# Supplementary material
Source: Research Square preprint supplement (doi:10.21203/rs.3.rs-10078689/v1)
Supplement: Supplementary file 1 [file 3d344a31fb519c52072abd4a.xlsx]

## Sheet: Sheet1
Index	Compounds	物质	Class I	物质一级分类	Class II	物质二级分类	Formula	Level	score	CAS	G1	G2	G3	H1	H2	H3	VIP	P-value	FDR	Fold_Change	Log2FC	Type
MW0115017	Nicotinamide riboside	烟酰胺核糖	Alcohol and amines	醇、胺类	Amines	胺类	C11H15N2O5+	2	0.9733	1341-23-7	164716	167644	200653	43853.9	52986.8	39257.2	1.33831	0.00374498	0.0192004	0.255337	-1.96953	down
MW0111826	1-Kestose	1-酮糖	Others	其它类	Saccharides	糖类	C18H32O16	2	0.9424	470-69-9	957841	1.14892e+06	1.11454e+06	139618	166176	244631	1.32976	0.000819648	0.00789895	0.170871	-2.54902	down
MW0003138	2-Hydroxybenzyl alcohol	水杨醇；邻羟基苄醇	Phenolic acids	酚酸类	Phenolic acids	酚酸类	C7H8O2	2	0.936	90-01-7	322056	154651	246171	542676	528124	504855	1.20003	0.0231838	0.0699386	2.1797	1.12413	up
MEDL00392	1-(9Z-octadecenoyl)-sn-glycero-3-phosphocholine	1-(9Z-十八烯酰基)-sn-glycero-3-phosphocholine	Lipids	脂质	LPC	溶血磷脂酰胆碱	C26H52NO7P	2	0.9238	19420-56-5	17159	4186.15	6792.35	20124.2	19538.8	24859.3	1.0356	0.0755571	0.16346	2.29311	1.19731	up
Lmrn003000	DL-3-Phenyllactic acid	DL-3-苯基乳酸	Organic acids	有机酸	Organic acids	有机酸	C9H10O3	2	0.9212	828-01-3	36680.3	38060.5	35996.1	6612.64	4892.62	5157.38	1.34838	3.11285e-06	0.00084365	0.150471	-2.73245	down
MW0104838	2-Phenylglycine	2-苯甘氨酸	Amino acids and derivatives	氨基酸及其衍生物	Amino acids and derivatives	氨基酸及其衍生物	C8H9NO2	2	0.9057	2835-06-5	11681.5	8794.33	13091.3	1516.03	1089.14	3585.93	1.25209	0.00643903	0.0278325	0.184439	-2.43878	down
MW0110291	Tyrosylphenylalanine	酪氨酰苯丙氨酸	Amino acids and derivatives	氨基酸及其衍生物	Amino acids and derivatives	氨基酸及其衍生物	C18H20N2O4	2	0.8557	17355-11-2	133494	133133	133243	263453	277924	276757	1.35341	0.00110064	0.00935412	2.046	1.03281	up
MW0122605	8-Desoxygartanin	8-脱氧花青素	Heterocyclic compounds	杂环化合物	Heterocyclic compounds	杂环化合物	C23H24O5	2	0.8467	33390-41-9	26509.2	30681.8	44195.4	80734.6	80749.6	73323.5	1.27505	0.00592435	0.026218	2.31597	1.21162	up
MW0129833	12a-Hydroxyrotenone	顺式鱼藤醇酮	Others	其它类	Ketone compounds	酮类化合物	C23H22O7	2	0.842	509-96-6	40591.9	36555.2	42004.1	91925.6	79808	118678	1.30436	0.0358888	0.0955418	2.43734	1.28531	up
MW0009160	Noroxycodone	去甲氧可酮	Benzene and substituted derivatives	苯及其衍生物	Benzene and substituted derivatives	苯及其衍生物	C17H19NO4	2	0.8324	57664-96-7	55695	56411.2	58306.4	480687	527493	573078	1.35346	0.00317961	0.0173849	9.27899	3.21397	up
MW0016178	Betulin	3,28-二羟基羽扇豆-20(29)-烯 (白桦脂醇)	Terpenoids	萜类	Triterpene	三萜	C30H50O2	2	0.8237	473-98-3	43594.9	40533.2	41062.7	20370.6	22144	12879.9	1.25632	0.00889475	0.0355407	0.44248	-1.17631	down
MEDN1606	N-Acetylarylamine	乙酰苯胺	Benzene and substituted derivatives	苯及其衍生物	Benzene and substituted derivatives	苯及其衍生物	C8H9NO	2	0.8158	55576-55-1	39433.1	51269.6	54555.5	395058	421911	412423	1.34906	1.90886e-05	0.00135636	8.4635	3.08125	up
MW0112967	4-(Methylnitrosamino)-1-(3-pyridyl)-1-butanone	4-(甲基亚硝基氨基)-1-(3-吡啶基)-1-丁酮	Others	其它类	Ketone compounds	酮类化合物	C10H13N3O2	2	0.8092	64091-91-4	79088.6	50269.6	52449.5	198116	130180	125389	1.23492	0.046361	0.114554	2.49541	1.31928	up
MW0104489	2-amino-3-(1H-pyrazol-1-yl)propanoic acid	L-2-氨基-3-(1-吡唑基）丙酸	Organic acids	有机酸	Organic acids	有机酸	C6H9N3O2	2	0.8039	2734-48-7	226017	229776	219380	580377	492069	899322	1.27976	0.0729544	0.159153	2.92039	1.54616	up
MW0013397	MG(0:0/20:4(5Z,8Z,11Z,14Z)/0:0)	2-花生四烯酰基甘油	GL	甘油脂类	MG	单甘油酯	C23H38O4	2	0.8	53847-30-6	22554.5	20051.5	21199.9	53228.4	58905.3	62746.1	1.34577	0.00353997	0.0184742	2.74081	1.4546	up
MW0000243	Ecgonine methyl ester	柠檬酸甲酯（EME）	Alkaloids	生物碱	Tropan alkaloids	莨菪烷类生物碱	C10H17NO3	2	0.7871	7143-09-1	42623.6	34801.2	42616.3	95602.8	90750.1	108013	1.3312	0.00218548	0.013596	2.45221	1.29408	up
MW0000024	Gnoscopine	诺斯卡品	Alkaloids	生物碱	Isoquinoline alkaloids	异喹啉类生物碱	C22H23NO7	2	0.7837	6035-40-1	23241.8	18354.2	14469.9	57953.8	42696.5	34804.8	1.23109	0.0463969	0.1146	2.416	1.27262	up
MW0005999	alpha-Hydroxyhippuric acid	羟基马尿酸	Benzene and substituted derivatives	苯及其衍生物	Benzene and substituted derivatives	苯及其衍生物	C9H9NO4	2	0.7829	16555-77-4	32819.2	27826.8	26733	96558.3	101267	98791.8	1.34747	1.64714e-05	0.00125977	3.39461	1.76324	up
MW0110241	Tyr-Asp	酪氨酸-天冬氨酸	Amino acids and derivatives	氨基酸及其衍生物	Amino acids and derivatives	氨基酸及其衍生物	C13H16N2O6	2	0.7826	87085-11-8	84613.9	55659.7	78507.7	22839	7569.5	26841.8	1.17599	0.0101259	0.0389221	0.261678	-1.93414	down
MW0004324	4-(4-Hydroxyphenyl)-2-butanone	覆盆子酮	Others	其它类	Ketone compounds	酮类化合物	C10H12O2	2	0.782	5471-51-2	17812.3	18353.8	19306	69108.8	79043.4	81936.5	1.35068	0.00403994	0.0202652	4.14783	2.05236	up
MW0109339	Pro-Tyr	脯氨酸-酪氨酸	Amino acids and derivatives	氨基酸及其衍生物	Amino acids and derivatives	氨基酸及其衍生物	C14H18N2O4	2	0.782	19786-36-8	10677.8	9107.55	5130.17	27577.5	28493.3	28001.6	1.27743	0.00590666	0.0262011	3.3743	1.75459	up
MW0104300	1-Phenyl-1-propanone	1-苯基丙酮	Others	其它类	Ketone compounds	酮类化合物	C9H10O	2	0.7799	93-55-0	13359.7	9196.56	11562.8	28296.3	32534.4	31773.1	1.31973	0.000404726	0.00534439	2.71414	1.44049	up
MW0118638	2-Hydroxyxanthone	2-羟基呫吨酮	Flavonoids	黄酮	Other Flavonoids	其它类黄酮	C13H8O3	2	0.7777	1915-98-6	62035.7	59814.5	60601.8	236803	203574	148137	1.31736	0.0345508	0.0930445	3.22558	1.68956	up
MW0006232	Benzidine	联苯胺	Benzene and substituted derivatives	苯及其衍生物	Benzene and substituted derivatives	苯及其衍生物	C12H12N2	2	0.776	92-87-5	81500.1	78666.1	73945.9	255421	309376	267043	1.34798	0.00597607	0.0263572	3.55317	1.82911	up
MW0112074	2-Aminoacetophenone	2-氨基苯乙酮	Others	其它类	Ketone compounds	酮类化合物	C8H9NO	2	0.7755	613-89-8	42881.4	37611.1	34117.6	285024	312388	307557	1.35163	0.000421253	0.00548624	7.89606	2.98113	up
MW0102922	Tributyrin	三丁酸甘油	GL	甘油脂类	TG	甘油三酯	C15H26O6	2	0.7751	60-01-5	52369	25587.6	25650.3	8398.47	10435.4	15026.9	1.19358	0.114882	0.22142	0.32682	-1.61343	down
MW0108617	2-Acetamido-3-methylbutanoic acid	N-乙酰基-DL-缬氨酸	Amino acids and derivatives	氨基酸及其衍生物	Amino acids and derivatives	氨基酸及其衍生物	C7H13NO3	2	0.7746	3067-19-4	663939	635773	642373	239491	234252	238899	1.3544	0.00027591	0.00434308	0.366947	-1.44636	down
MEDTP00969	Ser-phe	L-丝氨酰-L-苯丙氨酸	Amino acids and derivatives	氨基酸及其衍生物	Amino acids and derivatives	氨基酸及其衍生物	C12H16N2O4	2	0.7735	16875-28-8	9223.04	9950.51	14838.4	4039.82	3860.09	685.48	1.08614	0.0215605	0.0660842	0.252423	-1.98608	down
MW0003096	2-Hydroxy-3,4-dimethoxybenzoic acid	2-羟基-3,4-二甲氧基苯甲酸	Benzene and substituted derivatives	苯及其衍生物	Benzene and substituted derivatives	苯及其衍生物	C9H10O5	2	0.7734	5653-46-3	46196.7	41639.6	43626.2	2296.91	887.35	475.68	1.31695	0.000186936	0.00348499	0.0278402	-5.16669	down
MW0106972	Glu-Met	谷氨酸-蛋氨酸	Amino acids and derivatives	氨基酸及其衍生物	Amino acids and derivatives	氨基酸及其衍生物	C10H18N2O5S	2	0.7719	4423-22-7	29263.8	28397.5	31470.8	71469	81364.8	75195.5	1.34783	0.00189927	0.0125607	2.55833	1.3552	up
MW0109227	Phenylalanylserine	苯丙氨酰丝氨酸	Amino acids and derivatives	氨基酸及其衍生物	Amino acids and derivatives	氨基酸及其衍生物	C12H16N2O4	2	0.7692	16053-39-7	21701.7	9001.02	32446.2	74715.7	120422	79110.6	1.20319	0.0248414	0.073373	4.34288	2.11865	up
MW0168279	(2E)-2-[(2S,3R,4S,6R)-2-hydroxy-3,4-dimethoxy-6-[(2R,3R,4S,5S,6R)-3,4,5-trihydroxy-6-(hydroxymethyl)oxan-2-yl]oxycyclohexylidene]acetonitrile	西蒙得木素	Others	其它类	Others	其它	C16H25NO9	2	0.7687	51771-52-9	922.45	4609.81	4469.98	57439.6	63168.1	58222.8	1.28217	3.89904e-05	0.00171804	17.879	4.1602	up
MW0013556	2-Methyl-3-hydroxybutyric acid	2-甲基-3-羟基丁酸	Organic acids	有机酸	Organic acids	有机酸	C5H10O3	2	0.7681	473-86-9	56443.8	59958.7	64213.2	151668	158431	139305	1.34598	0.00131506	0.0102879	2.48818	1.31509	up
MW0125866	N'-nitrosonornicotine	N-亚硝基降烟碱	Heterocyclic compounds	杂环化合物	Heterocyclic compounds	杂环化合物	C9H11N3O	2	0.7678	16543-55-8	101.69	273.1	33.3	12064.3	12013.1	12718.5	1.31403	0.000109341	0.00268236	90.1662	6.49452	up
MW0052787	Limonin	柠檬苦素	Terpenoids	萜类	Triterpene	三萜	C26H30O8	2	0.7668	1180-71-8	18877.2	23991.6	19547	147215	113860	153175	1.34429	0.0097484	0.0379603	6.63694	2.73052	up
MW0109216	L-phenylalanyl-L-valine	L-苯丙氨酸-L-缬氨酸	Amino acids and derivatives	氨基酸及其衍生物	Amino acids and derivatives	氨基酸及其衍生物	C14H20N2O3	2	0.7648	3918-90-9	879254	896824	845592	448206	370699	367923	1.33632	0.000396911	0.00528039	0.452699	-1.14337	down
MEDN1036	Hydroxytyrosol	羟基酪醇	Phenolic acids	酚酸类	Phenolic acids	酚酸类	C8H10O3	2	0.7608	10597-60-1	257884	182381	184206	80104.8	88239.7	86430.2	1.30967	0.0372576	0.0982205	0.407985	-1.29341	down
MW0110092	Trp-Ala	色氨酸-丙氨酸	Amino acids and derivatives	氨基酸及其衍生物	Amino acids and derivatives	氨基酸及其衍生物	C14H17N3O3	2	0.7605	24046-71-7	559696	567453	586079	1.15864e+06	1.30882e+06	1.31082e+06	1.34701	0.00451429	0.0217889	2.20535	1.14101	up
MW0010762	Camphor	Camphor	Others	其它类	Others	其它	C10H16O	2	0.757	464-49-3	11627.7	5994.2	10891.9	38847.8	39978.9	39760.3	1.3019	0.00257875	0.0151852	4.15894	2.05622	up
MW0055118	Monomethyl glutaric acid	单甲基戊二酸	Organic acids	有机酸	Organic acids	有机酸	C6H10O4	2	0.7524	1501-27-5	6495.23	6179.47	5659.77	28772.8	30234.1	29283.6	1.35292	1.25497e-05	0.00116551	4.81555	2.2677	up
MW0125208	Monocrotaline	野百合碱	Alkaloids	生物碱	Pyrrole alkaloids	吡咯类生物碱	C16H23NO6	2	0.7523	315-22-0	226212	239161	236975	729610	803194	807740	1.35242	0.00172944	0.0119674	3.33246	1.73659	up
MEDN0441	Eudesmic acid	3,4,5-三甲氧基苯甲酸	Phenolic acids	酚酸类	Phenolic acids	酚酸类	C10H12O5	2	0.751	118-41-2	33964.8	33371.3	31068.9	109722	95783.7	96295.4	1.34906	0.00345424	0.0182421	3.06693	1.61679	up
MWS-00-149g_P	Alanylproline	L-丙氨酰基-L-脯氨酸	Amino acids and derivatives	氨基酸及其衍生物	Amino acids and derivatives	氨基酸及其衍生物	C8H14N2O3	2	0.7507	13485-59-1	560394	584841	508546	138282	257771	283556	1.21658	0.0078401	0.0324603	0.410943	-1.28299	down
MW0151171	Histidylserine	组氨酰丝氨酸	Amino acids and derivatives	氨基酸及其衍生物	Amino acids and derivatives	氨基酸及其衍生物	C9H14N4O4	2	0.7492	21438-60-8	19077	33400.9	21043.1	5296.22	14227.1	9890.48	1.11049	0.0608716	0.139242	0.400073	-1.32167	down
MW0111729	4-Hydroxy-3-(3-methyl-2-butenyl)acetophenone	3-异戊二烯基-4-羟基苯乙酮	Others	其它类	Ketone compounds	酮类化合物	C13H16O2	2	0.7484	26932-05-8	109886	116681	120636	29724.9	43116	34858.1	1.33145	0.000122016	0.00278408	0.31019	-1.68877	down
MW0114753	Lobeline	山梗菜碱	Alkaloids	生物碱	Piperidine alkaloids	哌啶类生物碱	C22H27NO2	2	0.7464	90-69-7	635.82	2544.94	2788.13	9864.47	11161.3	13168.3	1.21017	0.00204028	0.0130389	5.72871	2.51821	up
MW0106760	gamma-Glutamylalanine	5-L-谷氨酰-L-丙氨酸	Amino acids and derivatives	氨基酸及其衍生物	Amino acids and derivatives	氨基酸及其衍生物	C8H14N2O5	2	0.7455	5875-41-2	11871.5	10685.2	20597.3	3587.59	6549.46	4460.07	1.21071	0.0834987	0.175331	0.338256	-1.56381	down
MW0123887	Ethenodeoxyadenosine	乙氧基腺苷	Heterocyclic compounds	杂环化合物	Heterocyclic compounds	杂环化合物	C12H13N5O3	2	0.7453	68498-25-9	91527.6	121650	180961	13235.5	7282.41	11011.5	1.32578	0.0435962	0.109769	0.0799958	-3.64393	down
MEDL00684	FAA(18:1)	顺式十油酸	Lipids	脂质	Free fatty acids	游离脂肪酸	C18H34O2	2	0.7439	506-17-2	10969.2	11853.5	9527.45	26616	29245.2	28156.2	1.3409	7.94834e-05	0.00228638	2.59713	1.37692	up
MW0103346	2'-Deoxyguanosine-5'-diphosphate	2'-脱氧鸟苷-5'-二磷酸	Nucleotides and derivatives	核苷酸及其衍生物	Nucleotides and derivatives	核苷酸及其衍生物	C10H15N5O10P2	2	0.7414	3493-09-2	12187.6	28618.2	20561.3	5035.24	2922.43	877.63	1.19005	0.0584668	0.135296	0.143975	-2.79611	down
MW0113161	Musk ketone	4'-叔丁基-2'，6'-二甲基-3'，5'-二硝基苯乙酮	Others	其它类	Ketone compounds	酮类化合物	C14H18N2O5	2	0.7398	81-14-1	432.76	8094.89	6422.02	69840.5	84332.8	82481.1	1.17962	0.00074791	0.00750334	15.8301	3.9846	up
MEDL02462	Phosphoserine	O-磷酸-L-丝氨酸	Amino acids and derivatives	氨基酸及其衍生物	Amino acids and derivatives	氨基酸及其衍生物	C3H8NO6P	2	0.7397	407-41-0	6835.94	14727	13573.5	1128.8	1624.59	1351.96	1.31357	0.0517553	0.123563	0.11684	-3.09739	down
MW0153218	Lys-Asn	L-赖氨酸-L-天冬酰胺	Amino acids and derivatives	氨基酸及其衍生物	Amino acids and derivatives	氨基酸及其衍生物	C10H20N4O4	2	0.7396	19908-06-6	56001.9	52551.1	43244.2	177533	195017	190339	1.3443	5.82474e-05	0.00209208	3.70817	1.89071	up
MW0105739	Arg-Met	L-精氨酰-L-蛋氨酸	Amino acids and derivatives	氨基酸及其衍生物	Amino acids and derivatives	氨基酸及其衍生物	C11H23N5O3S	2	0.7352	45243-23-0	10343.3	13616.5	9592.57	39697.8	43889.5	41366.5	1.33665	6.18545e-05	0.00212651	3.72414	1.89691	up
MW0013024	2-(14,15-Epoxyeicosatrienoyl) Glycerol	2-(14,15-环氧二十碳三烯酰基）甘油	GL	甘油脂类	MG	单甘油酯	C23H38O5	2	0.7326	848667-56-1	46041.1	48104.3	45572.9	114769	119170	155789	1.33062	0.0231549	0.0698862	2.78938	1.47994	up
MW0153280	Lys-Trp	L-赖氨酸-L-色氨酸	Amino acids and derivatives	氨基酸及其衍生物	Amino acids and derivatives	氨基酸及其衍生物	C17H24N4O3	2	0.7295	50674-18-5	40668.6	20097.7	39186.7	16186.7	14274.9	15840.1	1.14038	0.113037	0.218968	0.463234	-1.11019	down
MW0102909	trans-Vaccenic acid	反式油酸	Lipids	脂质	Free fatty acids	游离脂肪酸	C18H34O2	2	0.7292	693-72-1	809767	777273	799843	1.87955e+06	2.00832e+06	2.0549e+06	1.35214	0.00145539	0.0109445	2.48977	1.31601	up
MEDL00096	2-Methylglutaric acid	2-甲基戊二酸	Organic acids	有机酸	Organic acids	有机酸	C6H10O4	2	0.7284	617-62-9	61186.8	72392.3	67858.6	20643	23952	25325.6	1.34029	0.00184334	0.0123925	0.347107	-1.52655	down
MW0125855	N-Methylphthalimide	N-甲基邻苯二甲酰亚胺	Alcohol and amines	醇、胺类	Amines	胺类	C9H7NO2	2	0.726	550-44-7	107320	100568	105598	24557.7	26181.7	26329.9	1.35376	0.000285719	0.00444555	0.245845	-2.02418	down
MW0011680	cis-4-Decen-1-ol	（Z)-4-癸烯-1-醇	Alcohol and amines	醇、胺类	Alcohols	醇类	C10H20O	2	0.7253	57074-37-0	44510	39947.6	42933	70934	169099	73905.3	1.11197	0.193343	0.324957	2.46437	1.30122	up
MEDN1876	Vanylglycol	3-甲氧基-4-羟基苯乙二醇	Benzene and substituted derivatives	苯及其衍生物	Benzene and substituted derivatives	苯及其衍生物	C9H12O4	2	0.7243	534-82-7	984218	928249	957077	433758	470548	483663	1.34809	2.45357e-05	0.00145006	0.48369	-1.04785	down
MW0138536	Isorhoifolin	异山豆素	Heterocyclic compounds	杂环化合物	Heterocyclic compounds	杂环化合物	C27H30O14	2	0.724	552-57-8	44276.6	40622.4	33773.5	8030.11	6264.58	7260.2	1.34441	0.00761258	0.031724	0.181633	-2.4609	down
MW0104828	2-Ketohexanoic acid	2-酮己酸	Organic acids	有机酸	Organic acids	有机酸	C6H10O3	2	0.7187	2492-75-3	38766.3	41540.3	34698.3	10301.8	14863	7142.05	1.28563	0.000827616	0.00793559	0.280917	-1.83179	down
MW0052411	Dimethyl succinate	丁二酸二甲酯	Others	其它类	Ketone compounds	酮类化合物	C6H10O4	2	0.7179	106-65-0	47862.3	36402.2	34043.8	106360	104204	105926	1.32584	0.00348769	0.0183146	2.67513	1.41961	up
MW0168166	Harmalol	骆驼蓬酚	Alkaloids	生物碱	Alkaloids	生物碱	C12H12N2O	2	0.7163	525-57-5	22446.9	7938.32	20923.8	148359	158245	89981.5	1.27488	0.0280288	0.0801299	7.72934	2.95035	up
MW0003179	2-Methoxyhydroquinone	2-甲氧基氢醌	Phenolic acids	酚酸类	Phenolic acids	酚酸类	C7H8O3	2	0.7127	824-46-4	39872.3	26533.5	7047.2	213167	213051	196053	1.23823	0.000296422	0.00452745	8.47169	3.08265	up
MW0107376	Homovanillic acid sulfate	硫酸高香草酸	Organic acids	有机酸	Organic acids	有机酸	C9H10O7S	2	0.7112	38339-06-9	421799	376736	244425	43945.2	154110	74059.9	1.18617	0.0213075	0.0655561	0.260906	-1.9384	down
MEDL00443	Gly-His	甘氨酸-组氨酸	Amino acids and derivatives	氨基酸及其衍生物	Amino acids and derivatives	氨基酸及其衍生物	C8H12N4O3	2	0.7084	2489-13-6	46820.5	22888.5	35543.8	87095.8	82684.6	85218.7	1.23471	0.0160887	0.0539743	2.42273	1.27663	up
MW0003213	2-Methoxynaphthalene	2-甲氧基萘	Benzene and substituted derivatives	苯及其衍生物	Benzene and substituted derivatives	苯及其衍生物	C11H10O	2	0.704	93-04-9	72507	56907	60236.3	135061	134863	143135	1.3301	0.000620816	0.00679448	2.178	1.12301	up
MW0114761	L-Quebrachitol	L-白雀木醇	Others	其它类	Saccharides	糖类	C7H14O6	2	0.7019	642-38-6 | 3564-07-6	11955.2	10771.5	13071.9	25624.9	26247.2	30724.4	1.33087	0.00459267	0.0220509	2.30725	1.20617	up
MEDP1775	Lipoamide	硫辛酰胺	Alcohol and amines	醇、胺类	Amines	胺类	C8H15NOS2	2	0.7006	940-69-2	45998.6	31908.4	29527	8956.95	14087.5	8709.5	1.28354	0.0287614	0.081695	0.295567	-1.75844	down
MEDP0022	L-Proline	L-脯氨酸	Amino acids and derivatives	氨基酸及其衍生物	Amino acids and derivatives	氨基酸及其衍生物	C5H9NO2	3	1	147-85-3	44089.8	29750.7	31771.3	130792	127403	120354	1.33038	0.000168941	0.00332814	3.58434	1.84171	up
MEDN1417	13-Hpode	13-过氧化羟基-9Z,11E-十八碳二烯酸	Lipids	脂质	Free fatty acids	游离脂肪酸	C18H32O4	3	0.9963	23017-93-8	22915.5	7512.83	15692.1	36266.9	38256.5	36984.9	1.12619	0.037275	0.0982264	2.41776	1.27367	up
MEDL01818	Brassinin	芸苔宁	Alkaloids	生物碱	Plumerane	吲哚类生物碱	C11H12N2S2	3	0.9883	105748-59-2	641636	295472	652580	157242	44669.2	106615	1.19554	0.0587784	0.135744	0.19408	-2.36528	down
MEDL00009	L-Valine	L-缬氨酸	Amino acids and derivatives	氨基酸及其衍生物	Amino acids and derivatives	氨基酸及其衍生物	C5H11NO2	3	0.9865	72-18-4	135574	182138	173778	731036	750744	767964	1.34524	1.08044e-05	0.00116551	4.57739	2.19453	up
MEDL02232	Salicin	水杨苷	Phenolic acids	酚酸类	Phenolic acids	酚酸类	C13H18O7	3	0.9844	138-52-3	69842.6	67359.5	69499.5	22350.5	22617	27916.1	1.34199	0.00036209	0.00496614	0.352602	-1.50389	down
MEDL00586	Arginine	L-精氨酸	Amino acids and derivatives	氨基酸及其衍生物	Amino acids and derivatives	氨基酸及其衍生物	C6H14N4O2	3	0.9827	74-79-3	1.33184e+06	1.12306e+06	1.13492e+06	5.65177e+06	5.57617e+06	5.5601e+06	1.3514	2.89636e-05	0.00164607	4.67656	2.22545	up
MEDL02681	6-Deoxyfagomine	6-脱氧荞麦碱	Alkaloids	生物碱	Piperidine alkaloids	哌啶类生物碱	C6H13NO2	3	0.9809	197449-09-5	830771	788894	741999	2.8776e+06	2.83062e+06	2.64719e+06	1.35201	0.000367568	0.00500956	3.53793	1.82291	up
MW0138335	(Z)-3-[4,5-dihydroxy-2-(2-hydroxypropan-2-yl)-2,3-dihydro-1-benzofuran-7-yl]prop-2-enoic acid	(Z)-3-[4,5-dihydroxy-2-(2-hydroxypropan-2-yl)-2,3-dihydro-1-benzofuran-7-yl]prop-2-enoic acid	Organic acids	有机酸	Organic acids	有机酸	C14H16O6	3	0.9809	13781-46-9	110567	107401	102485	61698.8	31609.1	63322.5	1.16265	0.0287648	0.081695	0.488777	-1.03275	down
MEDN0433	8-Hydroxy-2'-deoxyguanosine	8-羟基-2'-脱氧鸟苷	Nucleotides and derivatives	核苷酸及其衍生物	Nucleotides and derivatives	核苷酸及其衍生物	C10H13N5O5	3	0.9797	88847-89-6	51206.8	50162.7	49283.9	23667.4	24737.5	25936.5	1.35055	9.86733e-06	0.00116551	0.49346	-1.01899	down
MW0012329	13-Hydroxy-9-methoxy-10-oxo-11-octadecenoic acid	13-Hydroxy-9-methoxy-10-oxo-11-octadecenoic 酸	Lipids	脂质	Free fatty acids	游离脂肪酸	C19H34O5	3	0.9771	150147-08-3	3050.49	12090	13592.7	32425	32512.3	34944.7	1.12591	0.0143965	0.0496771	3.47619	1.79751	up
MEDP1647	2-Amino-1-phenylethanol	苯基乙醇胺	Alkaloids	生物碱	Alkaloids	生物碱	C8H11NO	3	0.9752	7568-93-6	2.0905e+06	2.08361e+06	1.95585e+06	6.13947e+06	6.05909e+06	6.36337e+06	1.35342	4.4941e-05	0.0018832	3.02807	1.5984	up
MW0114251	Dide-O-methyl-4-O-alpha-D-glucopyranosylsimmondsin	Dide-O-methyl-4-O-alpha-D-glucopyranosylsimmondsin	Others	其它类	Saccharides	糖类	C20H31NO14	3	0.9739	370068-00-1	187385	153002	173390	751490	868074	799093	1.34905	0.00144273	0.0108807	4.7076	2.23499	up
MEDL02347	L-Phenylalanine	L-苯丙氨酸	Amino acids and derivatives	氨基酸及其衍生物	Amino acids and derivatives	氨基酸及其衍生物	C9H11NO2	3	0.9702	63-91-2	406457	412841	440395	1.01123e+06	1.11542e+06	1.16054e+06	1.34833	0.00287008	0.0162388	2.60951	1.38378	up
MEDP0453	Indole	吲哚	Alkaloids	生物碱	Plumerane	吲哚类生物碱	C8H7N	3	0.969	120-72-9	68103.2	65850.4	45940.7	174947	190169	200913	1.32092	0.000243279	0.00404764	3.14645	1.65372	up
MW0015594	Agavasaponin C	龙舌兰皂苷C	Steroids	甾体	Steroidal saponins	甾体皂苷	C45H72O19	3	0.9678	56316-35-9	53034.2	45259	56695.3	8884.51	10033.4	7356.23	1.34426	0.0043659	0.0213243	0.169523	-2.56044	down
MEDN0417	Mevalonate	3,5-二羟基-3-甲基戊酸	Organic acids	有机酸	Organic acids	有机酸	C6H12O4	3	0.9663	150-97-0	51740.8	51900.4	50378.5	25761.2	23660.8	20893.9	1.33872	0.00101872	0.00896173	0.456538	-1.13119	down
MEDN0428	Succinyladenosine	琥珀酰腺苷	Nucleotides and derivatives	核苷酸及其衍生物	Nucleotides and derivatives	核苷酸及其衍生物	C14H17N5O8	3	0.9604	4542-23-8	697823	644446	648219	227714	257092	260183	1.34813	0.000137265	0.00296465	0.374274	-1.41783	down
MW0053447	Ganoderiol C	灵芝醇C	Others	其它类	Ketone compounds	酮类化合物	C32H54O5	3	0.9595	114567-44-1	466384	514796	445981	378299	78238.6	50122.6	1.02655	0.094858	0.192289	0.355012	-1.49406	down
MEDP0646	2,3-Dihydrobenzofuran	2,3-二氢苯并呋喃	Benzene and substituted derivatives	苯及其衍生物	Benzene and substituted derivatives	苯及其衍生物	C8H8O	3	0.9558	496-16-2	32.71	11.29	22.04	278.1	212.33	196.62	1.3076	0.0106525	0.0402734	10.4035	3.379	up
MW0007384	Iophendylate	碘芬酯	Benzene and substituted derivatives	苯及其衍生物	Benzene and substituted derivatives	苯及其衍生物	C19H29IO2	3	0.9557	99-79-6	3835.58	4774.08	4947.97	20277.1	11395.8	8880.79	1.21468	0.119888	0.228226	2.99121	1.58073	up
MW0110047	Tropate	莨菪酸	Organic acids	有机酸	Organic acids	有机酸	C9H10O3	3	0.9548	552-63-6	75748	72889.5	66235.2	197806	204473	186191	1.34871	0.000232453	0.00394859	2.73869	1.45349	up
MW0004489	4-((2-Hydroxy-1-naphthyl)azo)benzenesulphonic acid	4-((2-Hydroxy-1-naphthyl)azo)苯磺酸	Benzene and substituted derivatives	苯及其衍生物	Benzene and substituted derivatives	苯及其衍生物	C16H12N2O4S	3	0.9537	573-89-7	305611	295726	269608	142604	133873	131704	1.34571	0.00253749	0.0150376	0.468664	-1.09337	down
MEDN0551	3-Indoleacrylic acid	3-吲哚丙烯酸	Alkaloids	生物碱	Plumerane	吲哚类生物碱	C11H9NO2	3	0.9523	29953-71-7	2.88003e+06	2.82566e+06	2.90259e+06	1.20052e+07	1.30986e+07	1.30446e+07	1.3539	0.00125231	0.0100262	4.43158	2.14782	up
MEDP0178	Uracil	尿嘧啶	Nucleotides and derivatives	核苷酸及其衍生物	Nucleotides and derivatives	核苷酸及其衍生物	C4H4N2O2	3	0.9519	66-22-8	272268	258999	258101	45699.2	114295	94455.9	1.22832	0.0099745	0.0385748	0.322346	-1.63332	down
MEDN0236	Raffinose	棉籽糖	Others	其它类	Saccharides	糖类	C18H32O16	3	0.9515	512-69-6	98768.6	71414.8	92343.2	367.53	4321.15	8257.43	1.19767	0.00644757	0.0278388	0.0493135	-4.34187	down
MEDN0153	Adenosine monophosphate	腺苷-5'-单磷酸	Nucleotides and derivatives	核苷酸及其衍生物	Nucleotides and derivatives	核苷酸及其衍生物	C10H14N5O7P	3	0.9494	61-19-8	727446	677881	682259	295697	314455	332058	1.3481	0.000102245	0.00256747	0.45134	-1.14771	down
MEDN0068	S-(5-Adenosy)-L-Homocysteine	S-(5-腺苷)-L-高半胱氨酸	Amino acids and derivatives	氨基酸及其衍生物	Amino acids and derivatives	氨基酸及其衍生物	C14H20N6O5S	3	0.9485	979-92-0	146708	134450	125235	30075.5	33484.5	33286.4	1.35066	0.00285075	0.0162	0.238307	-2.06911	down
MEDL02230	Sarsasapogenin	螺旋甾烷-3-醇 (菝葜皂苷元)	Steroids	甾体	Steroid	甾体	C27H44O3	3	0.9458	126-19-2	1427.35	6509.21	3284.49	11105.3	12123	12970.6	1.13463	0.0203761	0.0634107	3.22598	1.68974	up
MW0148248	Deltonin	三角叶薯蓣皂苷	Steroids	甾体	Steroidal saponins	甾体皂苷	C45H72O17	3	0.9453	55659-75-1	6222.01	17167.9	13961.9	2971.84	1688.06	3557.79	1.20252	0.0921088	0.188598	0.220008	-2.18437	down
MW0054698	Medicagenic acid 28-O-[b-D-xylosyl-(1->4)-a-L-rhamnosyl-(1->2)-a-L-arabinosyl] ester	药源酸28-O-[bD-木糖基-(1->4)-aL-鼠李糖基-(1->2)-aL-阿拉伯糖基]酯	Terpenoids	萜类	Triterpene	三萜	C46H72O18	3	0.9448	129570-95-2	26337.3	49613.5	28236.4	6894.76	7744.91	7749.75	1.30695	0.067213	0.150207	0.214896	-2.21829	down
MEDN0562	Indole-3-carbinol	吲哚-3-甲醇	Alkaloids	生物碱	Plumerane	吲哚类生物碱	C9H9NO	3	0.9445	700-06-1	14050.1	17942.4	14092.6	53719.4	57873.1	56881.2	1.3439	2.25238e-05	0.00139655	3.65571	1.87015	up
MEDL01000	Octopamine	章鱼胺	Alcohol and amines	醇、胺类	Polyamines	多胺	C8H11NO2	3	0.9395	104-14-3	87584.9	13761.1	15861.8	610041	533068	562736	1.26188	9.23926e-05	0.00248671	14.554	3.86334	up
MW0127227	2,6-Dimethyl-3-((2-methyl-3-furyl)thio)-4-heptanone	2,6-二甲基-3-((2-甲基-3-呋喃基)硫代)-4-庚酮	Others	其它类	Ketone compounds	酮类化合物	C14H22O2S	3	0.9385	61295-51-0	17478.4	15558.9	19102.9	44255.7	44000.7	45430.1	1.34405	0.000293323	0.00449739	2.56398	1.35839	up
MEDP0276	Indole-3-carboxaldehyde	吲哚-3-甲醛	Alkaloids	生物碱	Plumerane	吲哚类生物碱	C9H7NO	3	0.9316	487-89-8	280828	295138	290868	1.09841e+06	1.2446e+06	1.27346e+06	1.35191	0.00331658	0.0178338	4.17204	2.06075	up
MEDP0151	Isoguanine	异鸟嘌呤	Nucleotides and derivatives	核苷酸及其衍生物	Nucleotides and derivatives	核苷酸及其衍生物	C5H5N5O	3	0.9282	3373-53-3	87946.7	143651	123306	20663	48887.9	40012.8	1.21662	0.0211027	0.0651728	0.308714	-1.69566	down
MEDP0302	Caffeic acid	咖啡酸	Phenolic acids	酚酸类	Phenolic acids	酚酸类	C9H8O4	3	0.9269	501-16-6	50762.7	49826	52839.6	3045.4	4368.25	4698.34	1.34741	1.39518e-05	0.00123915	0.0789423	-3.66306	down
MEDN0163	Hypoxanthine	次黄嘌呤	Nucleotides and derivatives	核苷酸及其衍生物	Nucleotides and derivatives	核苷酸及其衍生物	C5H4N4O	3	0.9174	68-94-0	29784.6	27430.9	26310.8	15083.4	6059.38	15878.6	1.10978	0.0292609	0.0826706	0.44323	-1.17387	down
MEDP1683	Trileucine	亮氨酸-亮氨酸-亮氨酸	Amino acids and derivatives	氨基酸及其衍生物	Amino acids and derivatives	氨基酸及其衍生物	C18H35N3O4	3	0.9147	10329-75-6	143568	135297	152091	298084	301918	328970	1.3454	0.00068263	0.0072435	2.15561	1.10809	up
MEDL02733	Tilarginine	N-单甲基-L-精氨酸	Amino acids and derivatives	氨基酸及其衍生物	Amino acids and derivatives	氨基酸及其衍生物	C7H16N4O2	3	0.9133	17035-90-4	23651.4	21611.4	22704	76047.1	59379	78473	1.33752	0.0142034	0.0491413	3.14711	1.65403	up
MEDP0128	Diethanolamine	二乙醇胺	Alkaloids	生物碱	Alkaloids	生物碱	C4H11NO2	3	0.9081	111-42-2	49404.2	48345.9	53842.3	143597	135826	139152	1.35146	1.20634e-05	0.00116551	2.76119	1.46529	up
MEDP0654	2-Phenylacetamide	2-苯乙酰胺	Alkaloids	生物碱	Alkaloids	生物碱	C8H9NO	3	0.9061	103-81-1	5367.81	11501.5	6067.65	155636	173299	141610	1.33845	0.00269867	0.0156018	20.5147	4.35859	up
MEDL02174	n-Oleoylethanolamine	油酰单乙醇胺	Alkaloids	生物碱	Alkaloids	生物碱	C20H39NO2	3	0.8822	111-58-0	6144.6	10488.6	5476.15	18902.5	28090.2	22868.8	1.26217	0.0116669	0.042851	3.15982	1.65984	up
MEDN1050	Phenyl acetate	乙酸苯酯	Phenolic acids	酚酸类	Phenolic acids	酚酸类	C8H8O2	3	0.8819	122-79-2	480317	454240	447123	185830	195089	188294	1.35264	0.000692416	0.00730584	0.411972	-1.27938	down
MEDL00388	Cathinone	卡西酮;阿拉伯茶酮	Alkaloids	生物碱	Alkaloids	生物碱	C9H11NO	3	0.8788	71031-15-7	35390.8	36580.5	37165	144247	156982	153273	1.35387	0.000890724	0.00829598	4.16453	2.05815	up
MEDP1315	Quinoline	喹啉	Alkaloids	生物碱	Quinoline alkaloids	喹啉类生物碱	C9H7N	3	0.8741	91-22-5	79160.2	84358.2	83357.5	281364	297635	308008	1.35322	0.000883957	0.00825662	3.59293	1.84516	up
MW0005990	Aloin	芦荟苷 B	Quinones	醌类	Anthraquinone	蒽醌	C21H22O9	3	0.8724	28371-16-6 | 8015-61-0 | 5133-19-7	345785	418190	334774	128773	103355	123078	1.33558	0.0070451	0.0298957	0.323282	-1.62913	down
MEDP0020	Methionine	L-蛋氨酸	Amino acids and derivatives	氨基酸及其衍生物	Amino acids and derivatives	氨基酸及其衍生物	C5H11NO2S	3	0.8703	63-68-3	2966.87	5503.37	5417.9	46404.1	22647.5	44248.4	1.29961	0.0470929	0.115983	8.15804	3.02822	up
MEDP1083	Oxypurinol	Oxypurinol	Heterocyclic compounds	杂环化合物	Heterocyclic compounds	杂环化合物	C5H4N4O2	3	0.8642	2465-59-0 | 184764-63-4 | 187486-05-1 | 187486-06-2	22998	20202.3	19791.8	74134.7	82046.4	84465.6	1.34924	0.00123889	0.00999263	3.82027	1.93367	up
MEDP0017	L-Histidine	L-组氨酸	Amino acids and derivatives	氨基酸及其衍生物	Amino acids and derivatives	氨基酸及其衍生物	C6H9N3O2	3	0.8636	71-00-1	58958.9	76100.1	63213.9	259722	267953	272109	1.34685	1.53994e-05	0.0012579	4.03375	2.01212	up
MEDP0370	Formylanthranilic acid	2-(甲酰氨基)苯甲酸	Phenolic acids	酚酸类	Phenolic acids	酚酸类	C8H7NO3	3	0.8553	3342-77-6	6861.34	6523.37	7587.37	456.97	666.4	318.17	1.33781	0.00100382	0.00887935	0.0687361	-3.86279	down
MW0138867	Malvidin 3-sophoroside 5-glucoside	Malvidin 3-槐糖苷 5-葡萄糖苷	Flavonoids	黄酮	Anthocyanidins	花青素	C35H45O22+	3	0.8517	61811-04-9	83588.8	70586.5	111430	429875	497704	456893	1.33632	0.000290811	0.00447796	5.21253	2.38198	up
MEDN0234	Globotriose	麦芽三糖	Others	其它类	Saccharides	糖类	C18H32O16	3	0.8499	1109-28-0 | 33404-34-1 | 66580-68-5	93611	81570.2	63411.8	652.87	2270.06	553.02	1.32658	0.0120555	0.0439308	0.0145685	-6.101	down
MW0013096	2,3-Dihydrowithanolide E	2,3-二氢紫苏内酯 E	Others	其它类	Lactones	内酯类化合物	C28H40O7	3	0.846	38253-76-8	69601.9	62257.3	80926.7	30847.7	28281.9	34771	1.31844	0.0112836	0.0419168	0.441291	-1.1802	down
MEDP1061	o-Tyrosine	DL-邻酪氨酸	Amino acids and derivatives	氨基酸及其衍生物	Amino acids and derivatives	氨基酸及其衍生物	C9H11NO3	3	0.8445	2370-61-8	226687	194738	185481	1.20312e+06	1.17617e+06	1.12041e+06	1.3513	5.25951e-05	0.00201082	5.76646	2.52769	up
MW0108661	3-(2-Acetamidoethyl)-1H-indol-5-yl hydrogen sulfate	3-(2-乙酰氨基乙基)-1H-吲哚-5-基硫酸氢盐	Tryptamines,Cholines,Pigments	色胺、胆碱、色素	Tryptamines	色胺	C12H14N2O5S	3	0.8293	94840-68-3	78354.2	25306.4	50969.1	474777	422169	462653	1.30058	5.42766e-05	0.00202789	8.79261	3.13629	up
MEDL02710	Indole-3-acetamide	吲哚-3-乙酰胺	Alkaloids	生物碱	Plumerane	吲哚类生物碱	C10H10N2O	3	0.8211	879-37-8	117278	120146	125160	53239.9	49426.8	47716.8	1.35006	3.55903e-05	0.00167509	0.414754	-1.26967	down
MW0013548	2''-Methoxy-(S)-oleuropein	2''-甲氧基-(S)-橄榄苦苷	Phenolic acids	酚酸类	Phenolic acids	酚酸类	C26H34O14	3	0.8185	256498-10-9	1748.62	1844.21	654.35	4450.77	6028.5	5685.03	1.21668	0.00344328	0.018199	3.80589	1.92823	up
MEDN1192	2',6'-Dihydroxyacetophenone	2',6'-二羟基苯乙酮	Phenolic acids	酚酸类	Phenolic acids	酚酸类	C8H8O3	3	0.8164	699-83-2	298631	265572	240097	105287	121576	113276	1.33456	0.00801295	0.0330325	0.422899	-1.24161	down
MW0109774	Suberylglycine	亚芥酸甘氨酸	Amino acids and derivatives	氨基酸及其衍生物	Amino acids and derivatives	氨基酸及其衍生物	C10H17NO5	3	0.8101	60317-54-6	231162	210003	215589	25781.9	30825.6	31797.6	1.35156	0.000485759	0.00585884	0.134609	-2.89315	down
MEDN0604	Tetradecanedioic acid	1,14-十四烷二酸	Lipids	脂质	Free fatty acids	游离脂肪酸	C14H26O4	3	0.8052	821-38-5	571262	543584	547202	965086	1.02589e+06	1.48018e+06	1.26882	0.0651634	0.146736	2.08848	1.06245	up
MW0134489	Calycopterin	5-羟基-2-(4-羟基苯基)-3,6,7,8-四甲氧基-4H-铬-4-酮	Others	其它类	Ketone compounds	酮类化合物	C19H18O8	3	0.8017	481-52-7	152874	146917	160892	49557.2	63389.4	60782.2	1.337	8.39966e-05	0.00234361	0.377111	-1.40694	down
MW0129934	1-O-E-Cinnamoyl-(6-arabinosylglucose)	1-OE-肉桂酰-(6-arabinosylglucose)	Benzene and substituted derivatives	苯及其衍生物	Benzene and substituted derivatives	苯及其衍生物	C20H26O11	3	0.8002	181373-66-0	638308	598737	621535	273510	299739	274475	1.34954	3.59242e-05	0.00167509	0.456114	-1.13254	down
MEDP0588	Ritalinic acid	利他宁酸	Organic acids	有机酸	Organic acids	有机酸	C13H17NO2	3	0.789	19395-41-6	27272.6	21980.9	24637.4	240893	272648	296624	1.35136	0.00402606	0.0202267	10.9644	3.45475	up
MEDP0560	Dihydrouracil	5,6-二氢尿嘧啶	Nucleotides and derivatives	核苷酸及其衍生物	Nucleotides and derivatives	核苷酸及其衍生物	C4H6N2O2	3	0.7875	504-07-4	3983.49	4827.88	1598.71	18939.2	12084.7	23234.6	1.23252	0.0369589	0.0976706	5.21212	2.38187	up
MEDP0792	Pyrrolidine	四氢吡咯	Alkaloids	生物碱	Pyrrole alkaloids	吡咯类生物碱	C4H9N	3	0.786	123-75-1	84272.2	84586.5	77120.8	297194	285952	320452	1.35167	0.00131705	0.0102911	3.67347	1.87714	up
MEDL01821	3-Furoic acid	3-糠酸	Organic acids	有机酸	Organic acids	有机酸	C5H4O3	3	0.7816	488-93-7	9796.52	10253.3	10261	155988	162749	174533	1.35451	0.00122098	0.0098849	16.2738	4.02448	up
MEDN0420	Acetylglycine	N-乙酰-L-甘氨酸	Amino acids and derivatives	氨基酸及其衍生物	Amino acids and derivatives	氨基酸及其衍生物	C4H7NO3	3	0.7808	543-24-8	130457	119029	125321	235027	273989	265692	1.34022	0.00497526	0.0232671	2.06695	1.0475	up
MEDN0056	N-Acetylleucine	N-乙酰基亮氨酸	Amino acids and derivatives	氨基酸及其衍生物	Amino acids and derivatives	氨基酸及其衍生物	C8H15NO3	3	0.7796	1188-21-2	92459.7	83963	87771.7	28503.3	23077.6	28903.1	1.34365	6.30903e-05	0.00212651	0.304639	-1.71483	down
MEDL02189	Gramine	芦竹碱	Alkaloids	生物碱	Plumerane	吲哚类生物碱	C11H14N2	3	0.7771	87-52-5	32469.8	28878.3	29464	11412	11719.1	3614.99	1.17329	0.00732708	0.0307908	0.294522	-1.76355	down
MW0136677	Fraxinol	白蜡树精	Lignans and Coumarins	木脂素和香豆素	Coumarins	香豆素	C11H10O5	3	0.7754	486-28-2	138899	151189	163729	47091.1	32621.3	44563.1	1.33127	0.0005548	0.00632904	0.273845	-1.86857	down
MW0123420	coproporphyrinogen III	卟啉原	Heterocyclic compounds	杂环化合物	Heterocyclic compounds	杂环化合物	C36H44N4O8	3	0.7746	2624-63-7	3673.04	2513.48	2508.22	4606.59	7070.94	8679.24	1.19148	0.06969	0.153891	2.34127	1.22729	up
MW0109300	Prilocaine	丙胺卡因	Alcohol and amines	醇、胺类	Amines	胺类	C13H20N2O	3	0.7743	721-50-6	45994	41950.8	37242.7	193886	190023	201272	1.35034	6.15266e-06	0.000949365	4.67444	2.22479	up
MEDL02197	7-O-Methylluteolin	羟基芫花素	Flavonoids	黄酮	Flavones	黄酮	C16H12O6	3	0.7702	20243-59-8	319874	337626	291948	160551	138167	139422	1.33656	0.00130136	0.0102423	0.461468	-1.1157	down
MEDN1397	Succinylacetone	4,6-二氧庚酸	Organic acids	有机酸	Organic acids	有机酸	C7H10O4	3	0.7699	51568-18-4	217358	200096	192281	66920.1	65168.1	72040.8	1.35008	0.001649	0.0116019	0.334783	-1.5787	down
MW0169164	Flavone	黄色素母酮	Flavonoids	黄酮	Flavones	黄酮	C15H10O2	3	0.7698	525-82-6	104007	56923.9	106019	29755.2	25002.9	28184	1.27033	0.0610484	0.139548	0.310703	-1.68639	down
MEDL02188	2-Aminobenzoic acid	邻氨基苯甲酸	Phenolic acids	酚酸类	Phenolic acids	酚酸类	C7H7NO2	3	0.7697	118-92-3	33165.9	28985.8	14690	165777	177399	180541	1.31235	4.519e-05	0.0018832	6.81554	2.76883	up
MEDP1646	Bis(3-aminopropyl)amine	3,3'-二氨基二丙胺	Alcohol and amines	醇、胺类	Amines	胺类	C6H17N3	3	0.7682	56-18-8	4865.35	4016.35	5267.67	2118.76	984.17	2041.33	1.2151	0.00445907	0.0216655	0.363568	-1.4597	down
MW0128061	2-Hydroxy-3-phenyl-2-propenal	（2Z)-2-羟基-3-苯基丙-2-烯醇	Others	其它类	Aldehyde compounds	醛类化合物	C9H8O2	3	0.768	82140-91-8	7728.87	5840.99	5995.83	14508.8	14765.1	13567.5	1.3188	0.00106616	0.00920465	2.18962	1.13068	up
MEDP0083	4-Hydroxyproline	反-4-羟基-L-脯氨酸	Amino acids and derivatives	氨基酸及其衍生物	Amino acids and derivatives	氨基酸及其衍生物	C5H9NO3	3	0.7675	51-35-4	145283	167484	138349	11576	12985.8	12945.3	1.35286	0.00395517	0.0199477	0.0831427	-3.58827	down
MEDL02411	5-hydroxy-L-tryptophan	5-羟基-L-色氨酸	Amino acids and derivatives	氨基酸及其衍生物	Amino acids and derivatives	氨基酸及其衍生物	C11H12N2O3	3	0.7665	4350-09-8	172277	180655	202982	484604	482487	440406	1.3447	0.000226517	0.0038874	2.53186	1.3402	up
MW0002036	2-(Methylamino)benzoic acid	N-邻氨基苯甲酸甲酯	Benzene and substituted derivatives	苯及其衍生物	Benzene and substituted derivatives	苯及其衍生物	C8H9NO2	3	0.7664	119-68-6	55529.2	46555.5	52539.7	168201	185434	201926	1.34587	0.00324685	0.0176363	3.59298	1.84518	up
MW0127398	Allyl methyl sulfone	Allyl methyl sulfone	Others	其它类	Ketone compounds	酮类化合物	C4H8O2S	3	0.7653	16215-14-8	28658.2	26145.6	26766.7	60737.9	70670	59461.4	1.34117	0.00722786	0.0304526	2.33993	1.22647	up
MEDN1539	Genipin	京尼平	Terpenoids	萜类	Monoterpenoids	倍萜	C11H14O5	3	0.7624	6902-77-8	127485	133429	133037	32477	33836.1	36681.4	1.35269	8.87537e-06	0.00116551	0.26144	-1.93545	down
MEDN1317	3,3-Dimethylglutaric acid	3,3-二甲基戊二酸	Organic acids	有机酸	Organic acids	有机酸	C7H12O4	3	0.7615	4839-46-7	66705.1	68977.6	64209.1	16375.7	21682.2	14722	1.3347	0.000117318	0.00273365	0.264042	-1.92116	down
MEDN1412	Aminopterin	氨基蝶呤	Heterocyclic compounds	杂环化合物	Heterocyclic compounds	杂环化合物	C19H20N8O5	3	0.7606	54-62-6	16373.6	16424.3	19848.1	99781.5	83580.8	94727.1	1.34835	0.00266277	0.0154515	5.28225	2.40115	up
MEDP1604	3-Indoleacetonitrile	3-吲哚乙腈	Alkaloids	生物碱	Plumerane	吲哚类生物碱	C10H8N2	3	0.7604	771-51-7	2951.53	3242.46	2220.4	24064.2	30270	30861.1	1.34533	0.00631863	0.0274215	10.125	3.33984	up
MEDL02023	Asparagine	L-天冬酰胺	Amino acids and derivatives	氨基酸及其衍生物	Amino acids and derivatives	氨基酸及其衍生物	C4H8N2O3	3	0.7604	70-47-3	17554.2	22278.7	25154	59694	62826.4	63144.8	1.32831	0.00057665	0.00649237	2.85697	1.51449	up
MEDL01843	Matairesinol	罗汉松树脂醇	Lignans and Coumarins	木脂素和香豆素	Lignans	木脂素	C20H22O6	3	0.7567	580-72-3	223691	214971	205377	550761	591415	572493	1.35202	0.000176911	0.00340815	2.66237	1.41271	up
MEDN0555	Hydroxyphenyllactic acid	2-羟基-3-(4-羟基苯基)丙酸	Benzene and substituted derivatives	苯及其衍生物	Phenolic acids	酚酸类	C9H10O4	3	0.7549	306-23-0	69521.1	64079.9	57296.8	6193.25	6426.9	11261.8	1.33111	0.00100403	0.00887935	0.125103	-2.99881	down
MEDP0426	Xanthurenic acid	4,8-二羟基喹啉-2-羧酸	Organic acids	有机酸	Organic acids	有机酸	C10H7NO4	3	0.7546	59-00-7	17254	20116.4	19842.2	55557.1	53465.3	56566.6	1.34868	9.69109e-06	0.00116551	2.89428	1.5332	up
MW0062070	Piperitone	胡椒酮	Terpenoids	萜类	Terpene	萜类	C10H16O	3	0.7545	89-81-6	19523	32304.6	26456.9	11987.6	6687.75	2776.46	1.14886	0.0172095	0.0565047	0.274024	-1.86763	down
MW0146493	Azaspiracid-1	阿扎哌酸-1	Organic acids	有机酸	Organic acids	有机酸	C47H71NO12	3	0.7544	214899-21-5	81.3	185.29	253.02	2417.55	2441.11	358.93	1.11813	0.150653	0.270401	10.0414	3.32788	up
MEDN0150	8-Hydroxyguanosine	8-羟基鸟苷	Nucleotides and derivatives	核苷酸及其衍生物	Nucleotides and derivatives	核苷酸及其衍生物	C10H13N5O6	3	0.7543	3868-31-3	210892	171269	157345	57226.2	30685.1	54571	1.29044	0.00513726	0.0237397	0.264097	-1.92086	down
MW0114721	Lepidimoic acid	鳞甲酸	Organic acids	有机酸	Organic acids	有机酸	C12H18O10	3	0.7498	157676-09-0	25034.4	21435.8	22937	6558.2	6877.03	2864.66	1.26697	0.000541499	0.0062306	0.234845	-2.09022	down
MEDP0081	Serotonin	血清素; 5-羟色胺	Alkaloids	生物碱	Plumerane	吲哚类生物碱	C10H12N2O	3	0.7489	50-67-9	8862.23	2951.68	8072.75	115740	135494	131030	1.31973	0.00113602	0.00951711	19.2221	4.2647	up
MW0006103	Avenanthramide L	燕麦蒽酰胺 L	Alkaloids	生物碱	Phenolamine	酚胺	C18H15NO5	3	0.7486	172549-38-1	39960.9	50240.4	39422.8	483.25	2810.83	4830.43	1.2371	0.00363818	0.0188111	0.0626775	-3.99591	down
MEDL02671	Sudachiin B	{6-[4-(5,7-二羟基-6,8-二甲氧基-4-氧代苯并吡喃-2-基)-2-甲氧基苯氧基]-3,4,5-三羟基恶烷-2-基}甲基-4-甲酰氧基-3-羟基-3-甲基丁酸酯	Flavonoids	黄酮	Flavones	黄酮	C30H34O17	3	0.7481	98891-96-4	1566.08	565.66	1607.64	5601.3	6641.13	3652.32	1.20704	0.0307553	0.0857971	4.25064	2.08768	up
MEDL00356	Phe-Asp	苯丙氨酸-天冬氨酸	Amino acids and derivatives	氨基酸及其衍生物	Amino acids and derivatives	氨基酸及其衍生物	C13H16N2O5	3	0.7474	22828-05-3	21839	21742.6	27635.8	77287.1	71254.1	66662.4	1.33755	0.000502734	0.00598585	3.02179	1.5954	up
MADP0489	Heptethylene glycol	七甘醇	Alcohol and amines	醇、胺类	Alcohols	醇类	C14H30O8	3	0.7458	5617-32-3	6897.29	1549.01	3136.65	10178.5	10447.4	10359.6	1.08794	0.0548567	0.128978	2.6751	1.41959	up
MEDL02755	5,7-Dimethoxyflavone	5,7-二甲氧基黄酮	Flavonoids	黄酮	Flavones	黄酮	C17H14O4	3	0.743	110241-33-3	131739	125524	127080	435678	464503	480205	1.35324	0.00127249	0.0101007	3.59155	1.84461	up
MW0111688	1,2-Benzoquinone	1,2-苯醌	Benzene and substituted derivatives	苯及其衍生物	Benzene and substituted derivatives	苯及其衍生物	C6H4O2	3	0.742	583-63-1	28279.2	22144.7	21552.3	13541.1	8192.86	10304.7	1.25376	0.00943463	0.0372175	0.44513	-1.1677	down
MW0103869	Canaline	L-副刀豆氨酸	Organic acids	有机酸	Organic acids	有机酸	C4H10N2O3	3	0.7412	496-93-5	690.27	709.02	214.36	6958.46	7431.03	6518.04	1.29968	0.000124211	0.00279573	12.9567	3.69562	up
MW0014136	3-Hydroxyvalproic acid	3-羟基丙戊酸	Organic acids	有机酸	Organic acids	有机酸	C8H16O3	3	0.7411	58888-84-9	39442.1	40703.8	38592	99047.8	102421	107512	1.35258	0.000852061	0.00806295	2.60221	1.37974	up
MW0137364	4(2H)-Benzofuranone, 7-beta-D-glucopyranosyl-3-[3-beta-D-glucopyranosyl-2,3,4-trihydroxy-5-[(2E)-3-(4-hydroxyphenyl)-1-oxo-2-propenyl]-6-oxo-1,4-cyclohexadien-1-yl]-3,7-dihydro-6,7-dihydroxy-5-[(2E)-3-(4-hydroxyphenyl)-1-oxo-2-propenyl]-2-[(1S,2R,3R)-1,2,3,4-tetrahydroxybutyl]-, (2S,3S)-	脱水红花黄色素 B	Phenolic acids	酚酸类	Phenolic acids	酚酸类	C48H52O26	3	0.7401	184840-84-4	6523.96	1512.79	2854.75	8399.43	9641.93	15013.5	1.09386	0.0474831	0.116706	3.03492	1.60166	up
MW0049061	CryptoMeridiol 11-rhaMnoside	柳杉二醇鼠李糖苷	Terpenoids	萜类	Sesquiterpenoids	倍半萜	C21H38O6	3	0.74	349112-30-7	604.38	2378.94	2677.53	12326.7	11563.5	9880.09	1.21717	0.000681603	0.0072435	5.96558	2.57666	up
MEDTP02578	2-Hydroxy-4-(methylthio)butyric acid	2-羟基-4-(甲硫基)丁酸	Organic acids	有机酸	Organic acids	有机酸	C5H10O3S	3	0.7393	120-91-2	1.18285e+06	909393	879519	352731	368955	506616	1.2861	0.0130583	0.0462123	0.413325	-1.27465	down
MW0123757	Dorzolamide	多佐胺	Alcohol and amines	醇、胺类	Amines	胺类	C10H16N2O4S3	3	0.7365	120279-96-1	17347	8191.22	16587.5	6504.19	1610	1953.84	1.14588	0.0475242	0.116763	0.238999	-2.06492	down
MEDN1558	Ascorbyl palmitate	L-抗坏血酸6-棕榈酸酯	Others	其它类	Lactones	内酯类化合物	C22H38O7	3	0.7354	137-66-6	1421.57	901.08	658.66	3799.02	5235.08	5228.9	1.29452	0.00676537	0.0289353	4.78414	2.25826	up
MEDP0437	Ergothioneine	麦角硫因	Alkaloids	生物碱	Alkaloids	生物碱	C9H15N3O2S	3	0.7345	497-30-3	806393	862394	854340	52446.3	59555.2	33416.6	1.34484	6.01687e-05	0.00212651	0.057634	-4.11694	down
MEDP1879	Phe-ala	L-苯丙氨酸基-L-丙氨酸	Amino acids and derivatives	氨基酸及其衍生物	Amino acids and derivatives	氨基酸及其衍生物	C12H16N2O3	3	0.7344	3918-87-4	13781.7	1581.53	4143.84	24130.9	20658.8	20493.5	1.05864	0.0438254	0.110168	3.34663	1.74271	up
MEDL02754	2,6-Dimethoxy-1,4-benzoquinone	2,6-二氧甲基-1,4-苯醌	Quinones	醌类	Quinones	醌类	C8H8O4	3	0.7341	530-55-2	10263.8	9397.35	8466.83	99.35	527.09	47.66	1.28386	0.00168136	0.0117282	0.0239654	-5.3829	down
MW0124205	Gambogic acid	藤黄酸	Organic acids	有机酸	Organic acids	有机酸	C38H44O8	3	0.7333	2752-65-0	357885	190427	83113.9	528535	508634	519147	1.06167	0.0604385	0.138349	2.46477	1.30145	up
MEDL02647	moracin I	桑辛素 I	Phenolic acids	酚酸类	Phenolic acids	酚酸类	C20H20O4	3	0.7322	73338-88-2	36449.6	34367.1	36310.9	9343.61	10471	14467.1	1.32087	0.00120927	0.00983916	0.320009	-1.64382	down
MEDP1294	Leu-Gly	L-亮氨酰-L-甘氨酸	Amino acids and derivatives	氨基酸及其衍生物	Amino acids and derivatives	氨基酸及其衍生物	C8H16N2O3	3	0.7309	686-50-0	260875	252654	265690	725445	770747	789569	1.35297	0.000987214	0.00886448	2.9334	1.55257	up
MW0108656	N-acetyl-S-(3-oxo-3-carboxy-n-propyl)cysteine	N-乙酰基-S-(3-氧代-3-羧基-正丙基）半胱氨酸	Amino acids and derivatives	氨基酸及其衍生物	Amino acids and derivatives	氨基酸及其衍生物	C9H13NO6S	3	0.7281	622368-00-7	192.76	1077.55	1269.6	4670.75	4986.03	6019.98	1.17218	0.00134754	0.010429	6.17217	2.62578	up
MW0128306	(7'R,8'R)-4,7'-Epoxy-3'-methoxy-4',5,9,9'-lignanetetrol 9'-glucoside	Eremopetasitenin B2	Terpenoids	萜类	Sesquiterpenoids	倍半萜	C25H32O11	3	0.7278	189100-15-0	10117.9	8221.97	14873.5	23082.6	25080.5	30201.7	1.24358	0.00664528	0.0285532	2.35944	1.23844	up
MEDN0499	L-Argininosuccinic acid	精氨基琥珀酸	Organic acids	有机酸	Organic acids	有机酸	C10H18N4O6	3	0.7277	2387-71-5	6033.34	9305.74	12819.4	31378.5	24027.9	20304.6	1.21445	0.0209647	0.0649007	2.68875	1.42694	up
MEDP0846	4-Methylbenzoic acid	4-甲基苯甲酸	Phenolic acids	酚酸类	Phenolic acids	酚酸类	C8H8O2	3	0.727	99-94-5	78972.9	90683.4	92551.3	203951	216939	228135	1.34361	0.000319669	0.00463876	2.47524	1.30757	up
MEDL00066	2-Hydroxy-2-methylbutyric acid	2-羟基-2-甲基丁酸	Organic acids	有机酸	Organic acids	有机酸	C5H10O3	3	0.7267	3739-30-8	17535.9	25848.6	36692.3	116049	100868	101676	1.2958	0.000462018	0.0057377	3.97859	1.99226	up
MW0122929	Artonol C	Artonol C	Heterocyclic compounds	杂环化合物	Heterocyclic compounds	杂环化合物	C30H28O7	3	0.7255	186824-59-9	11007	3775.57	4911	16712.4	14074	15632.1	1.12182	0.0461202	0.114176	2.35704	1.23698	up
MEDP0902	12-Hydroxydodecanoic acid	12-羟基十二酸	Lipids	脂质	Free fatty acids	游离脂肪酸	C12H24O3	3	0.7223	505-95-3	337.77	317.88	206.79	2399	2537.09	3019.38	1.33965	0.00464763	0.0221659	9.22438	3.20545	up
MEDP1869	Histidylleucine	组氨酸亮氨酸; N-L-组氨酸-L-亮氨酸	Amino acids and derivatives	氨基酸及其衍生物	Amino acids and derivatives	氨基酸及其衍生物	C12H20N4O3	3	0.7221	7763-65-7	13421	12602.3	13806.4	37834.2	43187	42442.8	1.3498	0.00256292	0.0151455	3.0998	1.63217	up
MW0112727	3,5-Dihydroxyphenyl 1-O-(6-O-galloyl-beta-D-glucopyranoside)	3,5-二羟基苯基 1-O-(6-O-没食子酰基-β-D-吡喃葡萄糖苷)	Benzene and substituted derivatives	苯及其衍生物	Benzene and substituted derivatives	苯及其衍生物	C19H20O12	3	0.7211	94356-21-5	261.93	539.64	878.15	3645.29	2684.61	2034.57	1.23112	0.0290482	0.0821876	4.97968	2.31605	up
MEDN0273	1,3-Dimethyluric acid	1,3-二甲基尿酸	Amino acids and derivatives	氨基酸及其衍生物	Amino acids and derivatives	氨基酸及其衍生物	C7H8N4O3	3	0.721	944-73-0	97303.6	74685.3	77740.1	30554.5	27297.6	30533.4	1.33488	0.0152182	0.051879	0.353926	-1.49848	down
MEDP1645	Benzamide	苯甲酰胺	Phenolic acids	酚酸类	Phenolic acids	酚酸类	C7H7NO	3	0.7183	55-21-0	99645.7	98668.8	107774	211788	225244	233738	1.34797	0.000641514	0.00691622	2.19143	1.13187	up
MW0111787	1-Cyano-2-hydroxy-3-butene	1-氰基-2-羟基-3-丁烯	Alcohol and amines	醇、胺类	Alcohols	醇类	C5H7NO	3	0.716	7451-85-6	1577.28	3357.31	2626.94	8059.36	9924.66	4494.58	1.16245	0.0773126	0.165954	2.97276	1.5718	up
MEDN1354	3-Methacrylic acid	3-甲基丙烯酸	Organic acids	有机酸	Organic acids	有机酸	C5H8O2	3	0.7156	541-47-9	15876.9	18449.5	17962.3	55132.1	63148.2	60759.1	1.34838	0.00139083	0.0106499	3.42405	1.7757	up
MEDP0291	3,7-Dimethyluric acid	3,7-二甲基尿酸	Amino acids and derivatives	氨基酸及其衍生物	Amino acids and derivatives	氨基酸及其衍生物	C7H8N4O3	3	0.7148	13087-49-5	299421	283871	275437	111681	96863.4	66045.6	1.30716	0.000991954	0.00887935	0.319763	-1.64492	down
MEDP0065	N-Acetyl-L-glutamic acid	N-乙酰-L-谷氨酸	Amino acids and derivatives	氨基酸及其衍生物	Amino acids and derivatives	氨基酸及其衍生物	C7H11NO5	3	0.7147	1188-37-0	5875.44	7654.21	11359.8	40550.9	39506.6	36705.4	1.31622	0.000198638	0.0036376	4.69127	2.22998	up
MW0119154	3,3-Dimethyl-1,2-dithiolane	3,3-二甲基-1,2-二硫杂环戊烷	Heterocyclic compounds	杂环化合物	Heterocyclic compounds	杂环化合物	C5H10S2	3	0.7134	58384-57-9	59530.6	43012.3	41778.4	20648.2	24123	23631.5	1.28474	0.0432975	0.109397	0.473961	-1.07716	down
MW0011146	(3b,16a,20R)-3,16,20,22,25-Pentahydroxy-5-cucurbiten-11-one 3-[rhamnosyl-(1->4)-[glucosyl-(1->6)]-glucoside]	(3b,16a,20R)-3,16,20,22,25-Pentahydroxy-5-cucurbiten-11-one 3-[rhamnosyl-(1->4)-[glucosyl-(1->6)]-glucoside]	Others	其它类	Ketone compounds	酮类化合物	C48H80O20	3	0.7126	251102-63-3	1548.16	1831.09	1781.02	755.61	579.23	941.61	1.27543	0.00239393	0.0144547	0.441149	-1.18066	down
MEDL01817	Quercetagetin	槲皮万寿菊素	Flavonoids	黄酮	Flavonols	黄酮醇	C15H10O8	3	0.7125	90-18-6	2103.08	3231.21	3966.37	13922.9	17376.4	12603.2	1.30972	0.00802453	0.0330592	4.72037	2.2389	up
MEDN0834	O-Succinyl-L-Homoserine	O-琥珀酰-L-高丝氨酸	Amino acids and derivatives	氨基酸及其衍生物	Amino acids and derivatives	氨基酸及其衍生物	C8H13NO6	3	0.7119	1492-23-5	28905.9	27324.5	26859.8	4870.65	7836.98	3473.6	1.30459	0.000713358	0.00738462	0.194743	-2.36036	down
MEDL00344	Glycyl-L-tyrosine	甘氨酸-酪氨酸	Amino acids and derivatives	氨基酸及其衍生物	Amino acids and derivatives	氨基酸及其衍生物	C11H14N2O4	3	0.7114	658-79-7	566.17	177.48	83.05	4100.52	3851.28	2960.16	1.26021	0.0043917	0.0214182	13.1994	3.7224	up
MW0109265	Phytosulfokine b	植物硫素b	Organic acids	有机酸	Organic acids	有机酸	C28H38N4O14S2	3	0.7081	179667-63-1	13551.8	13064.8	12134.4	1913.95	4883.04	4439.93	1.23312	0.00385314	0.0195595	0.289978	-1.78598	down
MW0124447	Isatin	靛红	Alkaloids	生物碱	Plumerane	吲哚类生物碱	C8H5NO2	3	0.7078	91-56-5	21204.3	21326.7	20383.2	2819.19	4591.83	3891.67	1.33664	5.68703e-05	0.00207387	0.179652	-2.47672	down
MEDL02624	Piperlonguminine	荜茇明宁碱	Alkaloids	生物碱	Alkaloids	生物碱	C16H19NO3	3	0.707	5950-12-9	654155	610911	643677	264122	262550	287500	1.35025	7.63201e-05	0.00227316	0.426549	-1.22922	down
MEDL01868	[6]-Gingerdione	[6]-姜辣二酮	Phenolic acids	酚酸类	Phenolic acids	酚酸类	C17H24O4	3	0.7065	61871-71-4	38957.4	32374.9	33327.9	65960.6	87844.6	75339.9	1.31183	0.0153464	0.0521247	2.18942	1.13055	up
MW0001678	1-nitrosonaphthalene	1-硝基萘	Benzene and substituted derivatives	苯及其衍生物	Benzene and substituted derivatives	苯及其衍生物	C10H7NO	3	0.7045	21711-65-9	448.63	378.58	587.51	7365.9	8690.9	9545.27	1.34793	0.00576086	0.0257575	18.0969	4.17767	up
MEDL02627	Melilotocarpan D	左旋白香草木犀紫檀酚 D	Phenolic acids	酚酸类	Phenolic acids	酚酸类	C17H16O6	3	0.7041	83013-81-4	14100.9	13181.7	10501.8	28208.2	49712.1	38788	1.2842	0.0477206	0.117001	3.0888	1.62705	up
MEDL01832	(-)-Arctigenin	牛蒡子苷元	Lignans and Coumarins	木脂素和香豆素	Lignans	木脂素	C21H24O6	3	0.7017	7770-78-7	1610.71	2024.86	5532.76	7791.89	11843.3	10759.8	1.16318	0.0151774	0.0517902	3.31521	1.7291	up
MEDP1136	D-Fructose-6-phosphate	D-果糖-6-磷酸	Others	其它类	Saccharides	糖类	C6H13O9P	3	0.7015	643-13-0	55513.4	66577.9	53798	16787.8	16688.7	16709.8	1.3473	0.00900874	0.035851	0.285329	-1.8093	down
MW0133198	3'-O-Methylepicatechin 7-O-glucuronide	3'-O-甲基表儿茶素 7-O-葡糖苷酸	Flavonoids	黄酮	Flavones	黄酮	C22H24O12	3	0.7005	603133-94-4	28861.6	20165.4	16729	50916.6	53402.6	48600.4	1.26901	0.00809539	0.0331914	2.32556	1.21758	up
MEDN0699	2-Phenylphenol	2-苯基苯酚	Phenolic acids	酚酸类	Phenolic acids	酚酸类	C12H10O	3	0.7004	90-43-7	1692.99	2229.59	1457.53	12105.1	11064.1	12099.7	1.34277	5.60929e-05	0.00206022	6.55543	2.71269	up
MW0137454	Avenanthramide A	燕麦蒽酰胺 A	Alkaloids	生物碱	Phenolamine	酚胺	C16H13NO5	3	0.6994	108605-70-5	38825.7	25988.5	34670.7	10068.3	17951.9	11554.8	1.23559	0.0161459	0.0540775	0.397798	-1.32989	down
MEDL01803	Pelletierine	石榴皮碱	Alkaloids	生物碱	Piperidine alkaloids	哌啶类生物碱	C8H15NO	3	0.699	539-00-4	381027	372757	355414	71953.2	66963.8	63866.5	1.35346	0.000220476	0.00386134	0.18282	-2.45151	down
MW0126798	Thioproperazine	硫代丙嗪	Heterocyclic compounds	杂环化合物	Heterocyclic compounds	杂环化合物	C22H30N4O2S2	3	0.6979	316-81-4	4173.12	3663.11	2773.67	5173.69	8077.88	7985.05	1.18618	0.048873	0.119042	2.00159	1.00114	up
MW0146370	Asp-Trp	天冬氨酸-色氨酸	Amino acids and derivatives	氨基酸及其衍生物	Amino acids and derivatives	氨基酸及其衍生物	C15H17N3O5	3	0.6974	71835-79-5	17987	19542.4	8314.38	5213.89	5180.7	1906.52	1.14111	0.0749577	0.162379	0.268327	-1.89794	down
MEDL01829	Isothankunic acid	异参枯尼酸	Terpenoids	萜类	Triterpene	三萜	C30H48O6	3	0.6969	22882-19-5	1623.87	230.16	828.65	7382.21	12907.2	14105	1.24198	0.0323019	0.0887177	12.8209	3.68043	up
MEDL02277	Methyl 2-aminobenzoate	邻氨基苯甲酸甲酯	Benzene and substituted derivatives	苯及其衍生物	Benzene and substituted derivatives	苯及其衍生物	C8H9NO2	3	0.6964	134-20-3	204391	220256	221208	62004.8	66237.7	68552.9	1.35198	0.000434085	0.00550064	0.304705	-1.71452	down
MEDL01930	Bis-ferulamidobutane	N,N'-二阿魏酰腐胺	Alkaloids	生物碱	Phenolamine	酚胺	C24H28N2O6	3	0.6953	42369-86-8	126032	114805	112449	26040.4	30759.8	26577.4	1.34983	0.000779236	0.00763898	0.236007	-2.0831	down
MW0108038	Lys-Asp	L-赖氨酸-L-天冬氨酸	Amino acids and derivatives	氨基酸及其衍生物	Amino acids and derivatives	氨基酸及其衍生物	C10H19N3O5	3	0.6946	20556-18-7	5299.2	5901.71	5029.65	44365.3	53684.8	47948.3	1.35204	0.00365938	0.0188637	8.99528	3.16917	up
MEDP0442	Choline Alfoscerate	甘磷酸胆碱 GPC	Lipids	脂质	PC	磷脂酰胆碱	C8H20NO6P	3	0.6935	28319-77-9	15408.2	21925.1	18640.5	36863.1	36879.3	40509.1	1.29983	0.00191294	0.0126126	2.04116	1.02939	up
MW0130376	2,3-Dihydro-5,5',7,7'-tetrahydroxy-2-(4-hydroxyphenyl)[3,8'-bi-4H-1-benzopyran]-4,4'-dione	2,3-Dihydro-5,5',7,7'-tetrahydroxy-2-(4-hydroxyphenyl)[3,8'-bi-4H-1-benzopyran]-4,4'-dione	Benzene and substituted derivatives	苯及其衍生物	Benzene and substituted derivatives	苯及其衍生物	C24H16O9	3	0.6922	60857-34-3	43825	45761.1	43298.5	22428.1	14534.9	11502.8	1.26878	0.0101302	0.0389221	0.364722	-1.45513	down
MW0103639	Orotidylic acid	乳清酸	Nucleotides and derivatives	核苷酸及其衍生物	Nucleotides and derivatives	核苷酸及其衍生物	C10H13N2O11P	3	0.6921	2149-82-8	21456.2	37635.6	19649.5	7064.67	11765.6	11988.7	1.17204	0.098456	0.197434	0.391395	-1.3533	down
MW0123113	Biotin sulfone	生物素砜	Others	其它类	Ketone compounds	酮类化合物	C10H16N2O5S	3	0.6917	40720-05-6	3859.62	5317.85	3000.39	49339.1	34222.4	23419.8	1.3139	0.0511339	0.122577	8.7849	3.13503	up
MW0014155	3-Methylglutaconic acid	3-甲基谷氨酸	Organic acids	有机酸	Organic acids	有机酸	C6H8O4	3	0.6914	5746-90-7	188822	224693	237648	129271	99527.5	88024.7	1.27291	0.00468722	0.0222421	0.48655	-1.03934	down
MEDL00643	Phenylacetylglutamine	苯乙酰-L-谷氨酰胺	Amino acids and derivatives	氨基酸及其衍生物	Amino acids and derivatives	氨基酸及其衍生物	C13H16N2O4	3	0.6909	28047-15-6	307051	250994	306808	126950	89850.3	102185	1.31729	0.00265695	0.0154359	0.368831	-1.43897	down
MEDP1739	4-Formyl-2-methoxyphenyl acetate	香兰素乙酸酯	Phenolic acids	酚酸类	Phenolic acids	酚酸类	C10H10O4	3	0.6906	881-68-5	666328	678157	637802	91533.8	93831.5	114725	1.35087	1.41694e-05	0.00123915	0.151386	-2.7237	down
MEDP1138	1-Methylhistamine	1-甲基组胺	Alkaloids	生物碱	Alkaloids	生物碱	C6H11N3	3	0.6892	501-75-7	12470.5	20575.1	20082.1	1793.62	2701.93	330.56	1.21512	0.0199185	0.062465	0.0908397	-3.46053	down
MW0103875	(2S)-2-Isopropyl-3-oxosuccinate	（2S)-2-异丙基-3-氧代琥珀酸酯	Organic acids	有机酸	Organic acids	有机酸	C7H10O5	3	0.6887	1245945-28-1	58227.9	57574.2	61583.1	16162.6	30105.9	18653.1	1.27328	0.00860269	0.0346721	0.365992	-1.45012	down
MEDP1665	Carnitine C3:0	肉碱 C3:0	FA	脂肪酰类	CAR	酰基肉碱	C10H19NO4	3	0.6864	17298-37-2	58849.9	54213.9	56402.2	1406.65	15860.4	4771.78	1.1795	0.00455555	0.0219375	0.130049	-2.94288	down
MW0114621	Indican	靛苷	Alkaloids	生物碱	Plumerane	吲哚类生物碱	C14H17NO6	3	0.6842	487-60-5	90836.8	95819.6	89645.9	173921	203167	201062	1.34061	0.00685393	0.0292371	2.09245	1.0652	up
MW0116583	1,2,5-Trimethylpyrrole	1,2,5-三甲基吡咯	Heterocyclic compounds	杂环化合物	Heterocyclic compounds	杂环化合物	C7H11N	3	0.6831	930-87-0	196.82	122.82	221	1086.46	830.66	1339.57	1.31406	0.0218082	0.0667807	6.02377	2.59067	up
MW0000447	Somniferine	催眠碱	Alkaloids	生物碱	Isoquinoline alkaloids	异喹啉类生物碱	C36H36N2O7	3	0.6831	117611-63-9	10194.6	4392.01	8802.96	20308.4	12791.5	28880.8	1.10198	0.095444	0.193116	2.64992	1.40595	up
MW0107641	L-Acetopine	L-乙酰丙酮	Amino acids and derivatives	氨基酸及其衍生物	Amino acids and derivatives	氨基酸及其衍生物	C8H16N4O4	3	0.6828	18416-86-9	2822.77	1106.74	4068.65	8912.35	8896.53	17284.5	1.17588	0.0729196	0.159153	4.38768	2.13346	up
MW0004342	4-(acetylamino)-N-(2,6-dimethylphenyl)benzamide	4-(乙酰氨基)-N-(2,6-二甲基苯基)苯甲酰胺	Benzene and substituted derivatives	苯及其衍生物	Benzene and substituted derivatives	苯及其衍生物	C17H18N2O2	3	0.6819	794-98-9	12992.3	4490.05	2973.24	38481.9	19284.6	33195.5	1.16661	0.0348905	0.0936724	4.44681	2.15277	up
MEDL02163	15(S)-HPETE	15(S)-过氧氢二十碳四烯酸	Lipids	脂质	Free fatty acids	游离脂肪酸	C20H32O4	3	0.6817	70981-96-3	63398.2	32882.2	38578.2	81555.1	97122.4	94702.1	1.18627	0.022105	0.0674037	2.02716	1.01946	up
MEDL02621	(R)-Higenamine	去甲乌药碱	Alkaloids	生物碱	Isoquinoline alkaloids	异喹啉类生物碱	C16H17NO3	3	0.6811	106032-53-5	126445	123139	118545	49402	56170.2	62555.7	1.33365	0.000384153	0.00515988	0.45671	-1.13065	down
MEDN1006	Uric acid	尿酸	Nucleotides and derivatives	核苷酸及其衍生物	Nucleotides and derivatives	核苷酸及其衍生物	C5H4N4O3	3	0.6804	69-93-2	144836	170249	113328	46165	61975	68982.1	1.26587	0.0237432	0.0710249	0.413437	-1.27426	down
MEDP1462	Eicosapentaenoic acid	二十碳五烯酸(顺-5,8,11,14,17)/EPA(C20:5)	Lipids	脂质	Free fatty acids	游离脂肪酸	C20H30O2	3	0.6801	10417-94-4	429588	520375	435521	882164	970847	947988	1.33063	0.000299336	0.00452745	2.02168	1.01555	up
MW0054155	Isovaleric acid	3-甲基丁酸酯	Lipids	脂质	Free fatty acids	游离脂肪酸	C5H10O2	3	0.6789	503-74-2	25704	23420.5	14603.8	151274	143767	131858	1.33195	0.000205703	0.00371728	6.69873	2.74389	up
MEDP0611	N-Acetylhistidine	N-乙酰-L-组氨酸	Amino acids and derivatives	氨基酸及其衍生物	Amino acids and derivatives	氨基酸及其衍生物	C8H11N3O3	3	0.6786	2497-02-1	94768.8	6806.01	36298	238312	249397	261520	1.10375	0.0116097	0.0427132	5.4342	2.44207	up
MEDP2134	(-)-alpha-Terpineol	α-松油醇	Alcohol and amines	醇、胺类	Alcohols	醇类	C10H18O	3	0.6785	10482-56-1	23176.8	29913.6	25830.8	55637.9	60059.1	61393.7	1.32981	0.000256371	0.00416855	2.24389	1.166	up
MW0112868	Prenol	3-甲基-2-丁烯-1-醇	Alcohol and amines	醇、胺类	Alcohols	醇类	C5H10O	3	0.6773	556-82-1	20393.1	12714.1	23301.8	59018.4	97694.8	94084.9	1.28785	0.0281399	0.0803767	4.44606	2.15253	up
MEDL02311	Moschamine	N-阿魏酰五羟色胺	Alkaloids	生物碱	Plumerane	吲哚类生物碱	C20H20N2O4	3	0.6746	68573-23-9	2041.08	2829.32	4147.46	1820.8	753.6	1494.31	1.0466	0.0972756	0.195786	0.451184	-1.14821	down
MEDN0743	2-Nonanone	2-壬酮	Others	其它类	Ketone compounds	酮类化合物	C9H18O	3	0.6746	821-55-6	38852.7	15566.2	39782.4	117069	87246.5	94993.4	1.20131	0.00480846	0.0226751	3.17733	1.66781	up
MEDL02592	4',5,7-Trimethoxyflavone	4',5,7-四甲氧基黄酮	Flavonoids	黄酮	Flavones	黄酮	C18H16O5	3	0.6717	5631-70-9	2404.18	2776.08	7261.95	8342.79	15438.4	7253.56	1.03474	0.122706	0.232231	2.49431	1.31864	up
MW0131207	3,5-Dimethoxycinnamic acid	3,5-二甲氧基肉桂酸	Organic acids	有机酸	Organic acids	有机酸	C11H12O4	3	0.6712	16909-11-8 | 20767-04-8	19227.1	17353.7	31285.4	40771.9	72437.3	37742.6	1.11279	0.116049	0.222809	2.22426	1.15332	up
MW0143525	5,6-epoxy-8Z,11Z,14Z-eicosatrienoic acid	5（6)-EET	Organic acids	有机酸	Organic acids	有机酸	C20H32O3	3	0.6697	81246-84-6	172779	156599	50063.6	280617	300847	306322	1.05223	0.0431304	0.109102	2.33972	1.22634	up
MEDP0577	Carnitine isoC4:0	异丁酰肉碱	Alkaloids	生物碱	Alkaloids	生物碱	C11H21NO4	3	0.6686	25518-49-4	10203.7	8903.89	10654.7	59337.1	67296.2	65485.4	1.35155	0.00131024	0.0102749	6.45512	2.69044	up
MW0103675	Thymidine-5'-phosphate	胸苷-5'-磷酸	Nucleotides and derivatives	核苷酸及其衍生物	Nucleotides and derivatives	核苷酸及其衍生物	C10H15N2O8P	3	0.6683	365-07-1	2295	22083.1	4240.36	297.22	495.26	1640.21	1.08558	0.299794	0.439055	0.0850041	-3.55632	down
MW0157888	Thr-His	L-苏氨酰-L-组氨酸	Amino acids and derivatives	氨基酸及其衍生物	Amino acids and derivatives	氨基酸及其衍生物	C10H16N4O4	3	0.6683	55831-93-1	11563.2	8368.47	10224.9	37017.7	40518	41728.5	1.34063	0.000168152	0.00332278	3.95482	1.98361	up
MW0104504	2-Amino-3-phosphonopropionic acid	2-氨基-3-膦酰基丙酸酯	Organic acids	有机酸	Organic acids	有机酸	C3H8NO5P	3	0.6683	5652-28-8	16458.8	14782.3	17898.4	38451.1	35613.3	35253.7	1.33911	0.000131691	0.00290516	2.22465	1.15358	up
MEDP0603	4-Isopropylbenzaldehyde	4-异丙基苯甲醛	Others	其它类	Aldehyde compounds	醛类化合物	C10H12O	3	0.6681	122-03-2	168.12	2214.77	488.14	5017.37	4871.43	4376.91	1.10811	0.0196094	0.0618238	4.96885	2.31291	up
MW0004109	3-Methoxyphenol	3-甲氧基苯酚	Phenolic acids	酚酸类	Phenolic acids	酚酸类	C7H8O2	3	0.6675	150-19-6	766991	743882	775739	321499	338085	328719	1.35353	3.67831e-05	0.00167509	0.432213	-1.21019	down
MEDN1016	Aminohippuric acid	氨基马尿酸	Amino acids and derivatives	氨基酸及其衍生物	Amino acids and derivatives	氨基酸及其衍生物	C9H10N2O3	3	0.6669	61-78-9	4.68629e+06	4.46028e+06	4.21156e+06	1.22163e+06	968993	1.43276e+06	1.33394	7.1733e-05	0.00220035	0.271249	-1.88231	down
MW0000121	Alkaloid RC	生物碱RC	Alkaloids	生物碱	Alkaloids	生物碱	C26H29NO11	3	0.6666	17948-36-6	153.22	294.66	250.52	1215.57	1834.19	1512.32	1.31726	0.0148436	0.0508687	6.53219	2.70757	up
MW0010025	Valdecoxib	伐地昔布	Benzene and substituted derivatives	苯及其衍生物	Benzene and substituted derivatives	苯及其衍生物	C16H14N2O3S	3	0.6652	181695-72-7	71755.3	115634	106608	49058.7	33796.8	49829.8	1.21545	0.0424618	0.108357	0.451314	-1.1478	down
MW0112259	Acetoxyacetone	乙酰氧丙酮	Others	其它类	Ketone compounds	酮类化合物	C5H8O3	3	0.6646	592-20-1	45186.9	40032.5	39368	127876	122106	132561	1.34961	7.74031e-05	0.00227316	3.07048	1.61846	up
MW0108975	Octanal	辛醛	Others	其它类	Aldehyde compounds	醛类化合物	C8H16O	3	0.663	124-13-0	3050.37	5933.89	52567.1	130334	128677	113188	1.12095	0.0153331	0.052107	6.04696	2.59621	up
MEDL00662	3-(2-Hydroxyphenyl)propanoic acid	3-(2-羟苯基)丙酸	Organic acids	有机酸	Organic acids	有机酸	C9H10O3	3	0.6606	495-78-3	5110.3	5691.93	5821.25	83930.2	73934	78407.4	1.35384	0.00147485	0.0110016	14.2131	3.82915	up
MEDL02423	Phosphocreatine	磷酸肌酸	Organic acids	有机酸	Organic acids	有机酸	C4H10N3O5P	3	0.6603	67-07-2	24374	27636.8	12051.8	62854.7	55190.3	48771.9	1.19684	0.00577516	0.0258036	2.60397	1.38071	up
MW0122821	Americanin B	美商陆素 B	Phenolic acids	酚酸类	Phenolic acids	酚酸类	C27H24O9	3	0.6594	77053-44-2	47680.3	41537	47811.8	16771.7	18722.8	10653	1.29017	0.000776363	0.00762407	0.336772	-1.57016	down
MW0109456	Pyridinoline	吡啶啉	Heterocyclic compounds	杂环化合物	Heterocyclic compounds	杂环化合物	C18H28N4O8	3	0.6593	63800-01-1	51451.4	47859.3	50356.2	21647	20566.4	20208.8	1.35188	0.000312692	0.00457428	0.417074	-1.26163	down
MW0006075	Arformoterol	阿福特罗	Benzene and substituted derivatives	苯及其衍生物	Benzene and substituted derivatives	苯及其衍生物	C19H24N2O4	3	0.659	67346-49-0	415.56	208.86	296.34	5268.44	8333.17	5638.05	1.33785	0.0237561	0.0710249	20.8954	4.38511	up
MEDP1157	3-Methylindole	粪臭素；3-甲基吲哚	Alkaloids	生物碱	Plumerane	吲哚类生物碱	C9H9N	3	0.6586	83-34-1	59255.6	60261.7	56297.5	246483	261395	272993	1.35338	0.00115277	0.00954669	4.44144	2.15103	up
MW0104448	[(1,3-Benzodioxol-5-ylcarbonyl)amino]acetic acid	2-{[（2H-1，3-苯并二氧杂环戊烯-5-基）（羟基）亚甲基]氨基}乙酸	Organic acids	有机酸	Organic acids	有机酸	C10H9NO5	3	0.6575	27855-25-0	4079.05	8575.73	15532.2	56728.9	62246.1	57335.4	1.26141	0.000920095	0.00850859	6.25504	2.64502	up
MEDP0298	Aminocaproic acid	6-氨基己酸	Organic acids	有机酸	Organic acids	有机酸	C6H13NO2	3	0.6573	60-32-2	7066.82	7138.13	8785.34	2453.73	3083.29	4250.53	1.2584	0.00468364	0.0222413	0.425725	-1.232	down
MW0127545	Pipazethate	哌嗪	Others	其它类	Lactones	内酯类化合物	C21H25N3O3S	3	0.6562	2167-85-3	84217.8	83345.8	82438.4	22943	23083.6	21359.2	1.35392	1.52007e-07	0.000266836	0.269541	-1.89142	down
MW0009771	Styrene Oxide	氧化苯乙烯	Benzene and substituted derivatives	苯及其衍生物	Benzene and substituted derivatives	苯及其衍生物	C8H8O	3	0.6548	96-09-3	4591.41	7874.54	3513.03	85050	93443.8	89826.4	1.33671	6.47013e-05	0.00212651	16.7921	4.06971	up
MEDL01782	Hydroxyanigorufone	2-羟基-9-(4-羟基苯基)-1H-萘嵌苯-1-酮	Others	其它类	Ketone compounds	酮类化合物	C19H12O3	3	0.6545	56252-02-9	16815.6	15667.4	19579.2	4991.63	3466.92	7157.03	1.27786	0.0015769	0.0113401	0.299941	-1.73725	down
MW0107291	His-Asp	组氨酸-天门冬氨酸	Amino acids and derivatives	氨基酸及其衍生物	Amino acids and derivatives	氨基酸及其衍生物	C10H14N4O5	3	0.6535	41658-60-0	30736.6	33326.9	31971.1	14033.7	10078	9481.18	1.31965	0.000970506	0.00882414	0.349799	-1.5154	down
MW0011145	(3b,16a,20R)-3,16,20,22,25-Pentahydroxy-5-cucurbiten-11-one 3-[glucosyl-(1->6)-glucoside]	(3b,16a,20R)-3,16,20,22,25-Pentahydroxy-5-cucurbiten-11-one 3-[glucosyl-(1->6)-glucoside]	Others	其它类	Ketone compounds	酮类化合物	C42H70O16	3	0.6522	178062-94-7	28251.2	33318.4	54597.4	6603.32	27250.3	8241.36	1.04882	0.0797556	0.169587	0.362367	-1.46448	down
MEDP0047	Histamine	组胺	Alkaloids	生物碱	Alkaloids	生物碱	C5H9N3	3	0.6511	51-45-6	35021.4	137835	44613.7	480517	462429	463077	1.25363	0.00552485	0.0250642	6.46535	2.69273	up
MEDL02258	Nordihydrocapsaicin	去甲二氢辣椒素	Alkaloids	生物碱	Phenolamine	酚胺	C17H27NO3	3	0.6507	28789-35-7	14633	6250.4	3904.04	62982.3	74443.8	118942	1.27792	0.041359	0.106149	10.3427	3.37054	up
MW0125248	Myristicin	肉豆蔻醚	Lignans and Coumarins	木脂素和香豆素	Lignans	木脂素	C11H12O3	3	0.6499	607-91-0	55413.9	51680.8	53732.7	25695.3	26220.8	25566.7	1.35263	0.00109657	0.00934316	0.481776	-1.05356	down
MW0127923	(E)-3-(2-hydroxyphenyl)-1-(4-methoxyphenyl)prop-2-en-1-one	（2E)-3-(2-羟基苯基)-1-(4-甲氧基苯基）丙-2-烯-1-酮	Others	其它类	Ketone compounds	酮类化合物	C16H14O3	3	0.6498	6607-92-7	35192.6	44674.2	35675.7	150418	156529	156811	1.34654	2.0238e-05	0.00135636	4.01375	2.00495	up
MEDN0403	Urocanic acid	尿刊酸	Organic acids	有机酸	Organic acids	有机酸	C6H6N2O2	3	0.6481	3465-72-3	84137.2	77553.6	92277.1	559499	588528	616685	1.35258	0.000560525	0.00635204	6.94856	2.79671	up
MW0000003	Cinchonan-3,9-diol, 6'-methoxy-, (8alpha,9R)-	（-)-(3S)-3-羟基奎宁	Alkaloids	生物碱	Alkaloids	生物碱	C20H24N2O3	3	0.6452	78549-61-8	51113.3	44925.2	44494.8	158744	162299	166719	1.35105	3.44883e-06	0.00084365	3.47079	1.79527	up
FDATP00848	Tromethamine	氨丁三醇	Alcohol and amines	醇、胺类	Alcohols	醇类	C4H11NO3	3	0.6446	77-86-1	11179.6	5501.15	3711.83	2118.84	1278.35	1716.43	1.18982	0.150531	0.270257	0.250759	-1.99563	down
MEDP1796	Perillyl alcohol	紫苏子醇	Terpenoids	萜类	Monoterpenoids	倍萜	C10H16O	3	0.6413	536-59-4	189723	210583	191686	509147	516132	546642	1.35055	9.35088e-05	0.00248671	2.6553	1.40888	up
MW0112179	2-Hydroxypropyl glucosinolate	2-羟丙基硫代葡萄糖苷	Others	其它类	Lactones	内酯类化合物	C10H19NO10S2	3	0.6412	76265-21-9	1619.94	1207.47	1123.52	61.35	66.26	235.48	1.27942	0.00901651	0.035851	0.0918999	-3.44379	down
MEDP0546	Oxindole	吲哚酮	Alkaloids	生物碱	Plumerane	吲哚类生物碱	C8H7NO	3	0.6406	59-48-3	4168.33	3121.55	2929.8	8398.8	8115.54	6057.02	1.26716	0.0156851	0.0529159	2.20862	1.14314	up
MEDL02259	Caffeine	咖啡碱	Alkaloids	生物碱	Alkaloids	生物碱	C8H10N4O2	3	0.6403	58-08-2	16018.6	18578.6	13635.2	4761.41	5080.06	3704.43	1.32685	0.0101505	0.0389591	0.280846	-1.83215	down
MW0062079	Pisumoside B	Pisumoside B	Alcohol and amines	醇、胺类	Alcohols	醇类	C32H52O16	3	0.6393	333334-43-3	2846.22	2834.31	4085.63	41105.4	44546.2	43242.5	1.34892	0.000111801	0.00269737	13.198	3.72225	up
MW0122299	Propylthiouracil	丙基硫氧嘧啶	Heterocyclic compounds	杂环化合物	Heterocyclic compounds	杂环化合物	C7H10N2OS	3	0.6393	51-52-5	39704.6	48943.3	40211.6	131508	136068	136627	1.34541	9.3564e-05	0.00248671	3.13677	1.64928	up
MW0014506	4-Hydroxyretinoic acid	4-羟基维A酸	Organic acids	有机酸	Organic acids	有机酸	C20H28O3	3	0.6392	66592-72-1	20650.3	20882.8	31232.7	77147.9	83729.9	81998	1.32177	0.000581643	0.0065145	3.33777	1.73889	up
MW0007639	Methocarbamol	美索巴莫	Phenolic acids	酚酸类	Phenolic acids	酚酸类	C11H15NO5	3	0.6383	532-03-6	40478	29344.4	24160.2	1465.98	577.71	1938.25	1.31685	0.0241421	0.0717967	0.0423689	-4.56085	down
MW0126643	1,3,7,9-Tetramethyluric acid	1,3,7,9-四甲基尿酸	Organic acids	有机酸	Organic acids	有机酸	C9H12N4O3	3	0.6381	2309-49-1	8590.3	7609.52	10419.1	49410.3	52825.2	52548.9	1.34738	1.24783e-05	0.00116551	5.81483	2.53974	up
MW0109398	Pro-Lys	脯氨酰-赖氨酸	Amino acids and derivatives	氨基酸及其衍生物	Amino acids and derivatives	氨基酸及其衍生物	C11H21N3O3	3	0.6365	71227-70-8	228266	200582	201158	85408.2	102399	83494.2	1.33281	0.00083792	0.00797926	0.430633	-1.21547	down
MEDL01937	2,3-Butanediol	2,3-丁二醇	Others	其它类	Alcohol compounds	醇类化合物	C4H10O2	3	0.6365	513-85-9	19010.5	16901.5	23704.5	37875.7	114246	91085.2	1.19563	0.112544	0.218402	4.07952	2.0284	up
MW0111358	(-)-erythro-Anethole glycol 1-glucoside	(-)-赤型-茴香脑二醇1-葡萄糖苷	Benzene and substituted derivatives	苯及其衍生物	Benzene and substituted derivatives	苯及其衍生物	C16H24O8	3	0.6337	217973-33-6	2635.79	3015.31	3024.44	3462.05	7548.84	6664.29	1.08681	0.135488	0.250087	2.03736	1.0267	up
MEDN0854	Methylglutaric acid	3-甲基戊二酸	Organic acids	有机酸	Organic acids	有机酸	C6H10O4	3	0.6333	626-51-7	537685	514904	513313	179236	187704	185483	1.35394	0.000175172	0.00340322	0.352782	-1.50315	down
FDATN00011	Lenalidomide	来那度胺	Alcohol and amines	醇、胺类	Amines	胺类	C13H13N3O3	3	0.6331	191732-72-6 | 443912-14-9	29622.6	12331.5	28423.5	36276.4	91405.5	46730.1	1.01661	0.167728	0.293226	2.47823	1.30931	up
MW0133045	7H-Furo(3,2-g)(1)benzopyran-7-one, 2,3-dihydro-3-hydroxy-2-(1-hydroxy-1-methylethyl)-	3-羟基-2-(2-羟基丙烷-2-基)-2H，3H，7H-呋喃并[3，2-g]苯并吡喃-7-酮	Others	其它类	Ketone compounds	酮类化合物	C14H14O5	3	0.6292	51580-96-2	1077.19	443.18	352.36	20458.6	22893	14267.3	1.32603	0.0179261	0.0581235	30.7673	4.94333	up
MW0127884	2'-Hydroxy-4'-Methoxychalcone	（2E)-1-(2-羟基-4-甲氧基苯基)-3-苯基丙-2-烯-1-酮	Others	其它类	Ketone compounds	酮类化合物	C16H14O3	3	0.6289	39273-61-5 | 52923-29-2	1923.52	1923.52	1923.52	27753.2	29280.5	29132	1.35485	0.000329033	0.0046905	14.9319	3.90033	up
MEDN1709	2-Octanamidoacetic acid	辛酰甘氨酸	Amino acids and derivatives	氨基酸及其衍生物	Amino acids and derivatives	氨基酸及其衍生物	C10H19NO3	3	0.6283	14246-53-8	36561.6	39475.7	42603.9	86591.7	80920.6	87197.4	1.34354	7.80201e-05	0.00227316	2.14689	1.10225	up
MW0056764	Panaxydol linoleate	人参酚亚油酸酯	FA	脂肪酰类	Others	其它	C35H54O3	3	0.6273	155551-19-2	103877	159495	61837.5	26768.8	29704.4	57362.7	1.10984	0.118477	0.226335	0.350039	-1.51441	down
MEDN1015	Nicotinic acid	烟酸 (维生素 B3)	Others	其它类	Vitamin	维生素	C6H5NO2	3	0.6269	59-67-6	46150.8	50619	37742.2	370855	342630	341614	1.34974	0.000224943	0.0038874	7.8439	2.97157	up
MEDTN00621	gamma-Glutamylglutamine	γ-L-谷氨酸-L-谷氨酰胺	Amino acids and derivatives	氨基酸及其衍生物	Amino acids and derivatives	氨基酸及其衍生物	C10H17N3O6	3	0.6259	10148-81-9	5060.06	3697	4481.68	52505.9	50095.3	58728.7	1.35033	0.00223203	0.0137932	12.1862	3.60718	up
MW0139288	Peonidin 3-arabinoside	芍药色素-3-阿拉伯糖苷	Flavonoids	黄酮	Anthocyanidins	花青素	C21H21ClO10	3	0.6257	524943-91-7	28972.6	8307.25	14182.7	1943.73	1827.19	3025.32	1.25342	0.13592	0.250601	0.132062	-2.92072	down
MW0116079	Angelicain	当归碱	Alkaloids	生物碱	Alkaloids	生物碱	C15H16O6	3	0.6245	49624-66-0	36494.4	41957.1	38120.2	16143.1	14049.3	16766.9	1.34018	0.00109395	0.00933302	0.402836	-1.31174	down
FDATN00757	Sulfinpyrazone	磺吡酮	Benzene and substituted derivatives	苯及其衍生物	Benzene and substituted derivatives	苯及其衍生物	C23H20N2O3S	3	0.6239	57-96-5	167321	164627	197135	46713.2	38561.6	87647.7	1.24406	0.0044869	0.0217519	0.326834	-1.61337	down
MW0053498	(2R)-3-sulfanyl-2-[(2E,6E,10E)-3,7,11,15-tetramethylhexadeca-2,6,10,14-tetraenamido]propanoic acid	香叶基香叶基半胱氨酸	Alcohol and amines	醇、胺类	Amines	胺类	C23H37NO3S	3	0.6217	169523-06-2	1.11069e+06	1.12649e+06	627796	219242	185091	135178	1.30181	0.0392231	0.102241	0.188312	-2.4088	down
MW0151169	His-Phe	L-苯丙氨酸-L-组氨酸	Amino acids and derivatives	氨基酸及其衍生物	Amino acids and derivatives	氨基酸及其衍生物	C15H18N4O3	3	0.6207	16874-81-0	12048.9	7815.28	4109.2	18006.4	26893.9	18577	1.13852	0.0250467	0.0737783	2.64782	1.4048	up
MEDP0203	Cinnamaldehyde	肉桂醛	Phenolic acids	酚酸类	Phenolic acids	酚酸类	C9H8O	3	0.6201	104-55-2	382.08	572.34	512.44	1125.22	2228.59	2164.49	1.26176	0.060253	0.138021	3.76198	1.91149	up
MW0105071	2-Amino-3-(4-hydroxy-3-iodophenyl)propanoic acid	2-氨基-3-(4-羟基-3-碘苯基)丙酸	Amino acids and derivatives	氨基酸及其衍生物	Amino acids and derivatives	氨基酸及其衍生物	C9H10INO3	3	0.6198	3078-39-5	11021.4	10378.2	9880.89	23423.4	27595.7	26894.1	1.34337	0.00456501	0.0219608	2.49079	1.3166	up
MEDN1138	3-Nitrotyrosine	3-硝基-L-酪氨酸	Amino acids and derivatives	氨基酸及其衍生物	Amino acids and derivatives	氨基酸及其衍生物	C9H10N2O5	3	0.6164	3604-79-3	60381.2	70732.5	70407.6	14264.4	13221.2	16801.3	1.34594	0.00212104	0.0133714	0.219763	-2.18598	down
MW0156343	Rebaudioside B	莱鲍迪甙B	Terpenoids	萜类	Ditepenoids	二萜	C38H60O18	3	0.6157	58543-17-2	22047.4	11918.1	18720.4	5326.98	4063.51	4437.52	1.29608	0.0471177	0.115983	0.262461	-1.92982	down
MEDP0745	2-Methoxy-4-methylphenol	2-甲氧基-4-甲基苯酚	Phenolic acids	酚酸类	Phenolic acids	酚酸类	C8H10O2	3	0.6147	93-51-6	299060	294641	279251	831091	818143	874284	1.35291	0.000283228	0.00444555	2.89078	1.53146	up
MW0006985	Eprosartan	依普罗沙坦	Benzene and substituted derivatives	苯及其衍生物	Benzene and substituted derivatives	苯及其衍生物	C23H24N2O4S	3	0.6146	133040-01-4	6661.51	4813.95	2522.08	15319.9	14757.9	30231.3	1.21236	0.0858238	0.178827	4.30855	2.1072	up
MW0138593	Kaempferol 3-(2'',3''-diacetyl-4''-p-coumaroylrhamnoside)	山奈酚 3-(2'',3''-diacetyl-4''-p-香豆酰鼠李糖苷)	Flavonoids	黄酮	Flavones	黄酮	C34H30O14	3	0.6142	128941-61-7	6164.08	1011.71	10641.4	31906	15271	51023.8	1.05616	0.113481	0.219239	5.51157	2.46246	up
MW0169501	Myricitrin	杨梅素-3-O-鼠李糖苷 (杨梅苷)	Flavonoids	黄酮	Flavonols	黄酮醇	C21H20O12	3	0.6139	17912-87-7	60252.1	38656	43207.7	22237.2	22390.2	17770.2	1.26748	0.0497767	0.120431	0.439062	-1.1875	down
MEDL00363	Ile-Met	L-异亮氨酸-L-蛋氨酸	Amino acids and derivatives	氨基酸及其衍生物	Amino acids and derivatives	氨基酸及其衍生物	C11H22N2O3S	3	0.6109	42384-14-5	95702.3	110476	99331.1	19359.7	18808.1	7732.57	1.29472	0.000141817	0.00303274	0.150242	-2.73464	down
MW0123195	Calabaxanthone	卡拉巴蒽醌	Flavonoids	黄酮	Other Flavonoids	其它类黄酮	C24H24O5	3	0.6101	39011-96-6	2051.28	2094.5	1724.98	8400.97	9065.11	8879.11	1.34982	4.62492e-05	0.00189098	4.48753	2.16592	up
MW0055103	Momordin Ie	莫尔丁	Terpenoids	萜类	Triterpene Saponin	三萜皂苷	C46H72O17	3	0.6068	96158-13-3	4238.01	1626.77	5107.26	1115.73	507.09	1430.68	1.08359	0.119721	0.227976	0.278298	-1.8453	down
MEDN1507	3-Methylpentanoic acid	3-甲基戊酸	Organic acids	有机酸	Organic acids	有机酸	C6H12O2	3	0.6029	105-43-1	4120.04	2084.86	1345.89	25934.2	24800.7	28564.6	1.30877	0.000115677	0.00271983	10.5021	3.39261	up
MEDL02553	Piperine	胡椒碱	Alkaloids	生物碱	Piperidine alkaloids	哌啶类生物碱	C17H19NO3	3	0.6021	94-62-2	92122	92347.6	93998.3	250233	254582	250988	1.35478	4.48378e-06	0.000949365	2.71415	1.4405	up
MW0137498	Benzyl cinnamate	肉桂酸苄酯	Benzene and substituted derivatives	苯及其衍生物	Benzene and substituted derivatives	苯及其衍生物	C16H14O2	3	0.5998	103-41-3 | 8014-16-2 | 78277-23-3	14022.4	15515.6	14468	41202	42744.1	44829.9	1.35152	0.000299462	0.00452745	2.92632	1.54909	up
MW0134506	5-Hydroxyflavone	5-羟基黄酮	Flavonoids	黄酮	Flavones	黄酮	C15H10O3	3	0.5986	491-78-1 | 66585-06-6	30203.6	14880.4	30486	10458.7	15681	6338.75	1.04638	0.0896313	0.184806	0.42978	-1.21833	down
MEDL02206	Anatabine	新烟草碱	Alkaloids	生物碱	Pyridine alkaloids	吡啶类生物碱	C10H12N2	3	0.5916	581-49-7	2728.24	1223.96	1905.09	7254.31	2596.42	5507.86	1.04352	0.134831	0.249442	2.62213	1.39074	up
MW0114532	3-Indolylmethyl glucosinolate	3-吲哚基甲基硫苷	Others	其它类	Glucosinolates	硫苷类	C16H20N2O9S2	3	0.5914	4356-52-9	13591.2	13638.9	14795.2	6867.15	3333.82	7168.67	1.19624	0.0148021	0.0508071	0.413315	-1.27469	down
MW0108074	Lys-Ser	赖氨酰丝氨酸	Amino acids and derivatives	氨基酸及其衍生物	Amino acids and derivatives	氨基酸及其衍生物	C9H19N3O4	3	0.5897	6665-19-6	21543.8	11046.2	10598.9	4608.58	4823.97	6959.74	1.17863	0.124293	0.234618	0.379549	-1.39764	down
MW0015736	alpha-Terpinyl anthranilate	α-萜品基邻氨基苯甲酸酯	Others	其它类	Lactones	内酯类化合物	C17H23NO2	3	0.5885	14481-52-8	3930.74	12773.5	7817.06	86116.6	94125.3	90735	1.30745	2.00604e-05	0.00135636	11.0507	3.46606	up
MEDL02632	5-[6-[[3,4-Dihydroxy-4-(hydroxymethyl)oxolan-2-yl]oxymethyl]-3,4,5-trihydroxyoxan-2-yl]oxy-6-hydroxy-8-methoxy-2-methylbenzo[g]chromen-4-one	决明子苷 B	Quinones	醌类	Quinones	醌类	C26H30O14	3	0.5844	119170-51-3	23538.6	46625.2	17394.7	10014.8	3640.11	6105.04	1.1841	0.120812	0.229649	0.225677	-2.14767	down
MEDN1677	2'-Adenylic acid	腺苷-2'-磷酸	Nucleotides and derivatives	核苷酸及其衍生物	Nucleotides and derivatives	核苷酸及其衍生物	C10H14N5O7P	3	0.5835	130-49-4	7511.62	3234.38	5318.33	28115	30861.9	29561.2	1.30486	0.000227229	0.0038874	5.51147	2.46244	up
MW0144098	(9E,11E)-Octadecadienoic acid	异亚油酸	Lipids	脂质	Free fatty acids	游离脂肪酸	C18H32O2	3	0.5818	1839-11-8	8583.61	6861.12	4111.85	12123.9	18977.1	18453.4	1.18798	0.0257699	0.0754641	2.5339	1.34136	up
MW0000925	Bis(2-methylpropanoyloxy)-9,10-epoxy-p-mentha-1,3,5-triene	双（2-甲基丙酰氧基）-9,10-epoxy-p-mentha-1,3,5-triene	Phenolic acids	酚酸类	Phenolic acids	酚酸类	C18H24O5	3	0.5779	22518-06-5	917.41	710.19	1305.57	365.31	238.71	432.82	1.22099	0.056867	0.132459	0.353488	-1.50027	down
MW0009517	Procainamide	普鲁卡因胺	Benzene and substituted derivatives	苯及其衍生物	Benzene and substituted derivatives	苯及其衍生物	C13H21N3O	3	0.5743	51-06-9	10097.7	6937.96	4203.64	25312.5	27900.5	16606.9	1.21745	0.0250263	0.0737516	3.2873	1.7169	up
MEDP0067	2-Acetamido-2-Deoxy-D-Mannopyranose	N-乙酰-D-甘露糖胺	Others	其它类	Saccharides	糖类	C8H15NO6	3	0.5743	7772-94-3 | 1136-44-3	140161	138294	125156	62682.1	8552.94	7709.96	1.14005	0.0214292	0.0658143	0.195597	-2.35405	down
MEDP0322	L-Homoserine	L-高丝氨酸	Amino acids and derivatives	氨基酸及其衍生物	Amino acids and derivatives	氨基酸及其衍生物	C4H9NO3	3	0.5733	672-15-1	18035.7	12943.8	5596.59	110939	113949	101223	1.29581	5.37986e-05	0.00202164	8.91591	3.15638	up
MW0118912	2-Thiophenethiol	2-噻吩硫醇	Heterocyclic compounds	杂环化合物	Heterocyclic compounds	杂环化合物	C4H4S2	3	0.5705	7774-74-5	2.4	2.37	2.37	905.98	507.44	626.4	1.35247	0.0290736	0.0822128	285.689	8.1583	up
MW0127431	Di-1-propenyl sulfide	二-1-丙烯硫醚	Others	其它类	Others	其它	C6H10S	3	0.5657	33922-80-4	108.91	79.65	109.46	2013.52	2050.51	2095.46	1.35164	1.55784e-05	0.0012579	20.668	4.36933	up
MEDN1402	3,4-Dihydroxyhydrocinnamic acid	二氢咖啡酸	Phenolic acids	酚酸类	Phenolic acids	酚酸类	C9H10O4	3	0.5613	1078-61-1	7908.26	6234.89	8071.08	21884.1	21429.8	24790.2	1.33611	0.000847812	0.00803444	3.06579	1.61626	up
MEDP0295	4-Acetamidobutanoic acid	4-乙酰氨基丁酸	Organic acids	有机酸	Organic acids	有机酸	C6H11NO3	3	0.5573	3025-96-5	234.58	146.25	142.75	318.83	1240.9	830.82	1.15184	0.143151	0.26046	4.56578	2.19086	up
MEDP0296	4-Guanidinobutyric acid	4-胍基丁酸	Organic acids	有机酸	Organic acids	有机酸	C5H11N3O2	3	0.5547	463-00-3	34331.2	19779.1	38599	6431.79	7251.81	4499.46	1.2935	0.0462426	0.114349	0.19613	-2.35012	down
FDATN00311	Ipriflavone	7-异丙氧基异黄酮	Flavonoids	黄酮	Isoflavones	异黄酮	C18H16O3	3	0.5512	35212-22-7	29364.8	32786.3	30364.7	12463.4	10915.1	5649.78	1.2549	0.00303403	0.0168728	0.313766	-1.67224	down
MEDN0050	L-Theanine	茶氨酸	Amino acids and derivatives	氨基酸及其衍生物	Amino acids and derivatives	氨基酸及其衍生物	C7H14N2O3	3	0.5444	3081-61-6	49568.3	31389.5	46450.1	94162.6	92706.6	122762	1.26768	0.0107152	0.0403822	2.43023	1.28109	up
MW0117833	2,3-Dihydro-5-methyl-3-thiophenethiol	2,3-二氢-5-甲基-3-噻吩硫醇	Heterocyclic compounds	杂环化合物	Heterocyclic compounds	杂环化合物	C5H8S2	3	0.5436	56079-02-8	10688.4	9139.98	12227.4	6478.18	2113.57	3902.81	1.13839	0.0170268	0.0561313	0.389776	-1.35928	down
MW0009105	Nitazoxanide	硝唑尼特	Benzene and substituted derivatives	苯及其衍生物	Benzene and substituted derivatives	苯及其衍生物	C12H9N3O5S	3	0.5424	55981-09-4	1588.63	801.73	921.79	3531.13	1949.86	2775.17	1.17035	0.0486685	0.118811	2.49269	1.3177	up
MW0055214	2-Isopropyl-N,2,3-trimethylbutanamide	2-异丙基-N,2,3-三甲基丁酰胺	FA	脂肪酰类	Others	其它	C10H21NO	3	0.5416	51115-67-4	348.49	249.15	288.91	1.77	1.77	1.77	1.35402	0.00951941	0.0374158	0.00598951	-7.38335	down
MEDP1080	Glycyltryptophan	甘氨酰-色氨酸	Amino acids and derivatives	氨基酸及其衍生物	Amino acids and derivatives	氨基酸及其衍生物	C13H15N3O3	3	0.5406	2390-74-1	12534.6	12225.8	14250.1	740.55	1449.84	306.61	1.29463	0.000405289	0.00534439	0.0640085	-3.96559	down
MW0127129	(E)-4-Isothiocyanato-1-(methylthio)-1-butene	(E)-4-异硫氰酸根-1-(甲硫基)-1-丁烯	Others	其它类	Others	其它	C6H9NS2	3	0.5399	13028-50-7	213.58	198.38	1309.32	4276.75	4217.26	4073.38	1.20472	0.00878817	0.0352448	7.30119	2.86813	up
MW0119095	3-(6-Amino-9h-purin-9-yl)propanoic acid	3-(6-Amino-9h-purin-9-yl)丙酸	Organic acids	有机酸	Organic acids	有机酸	C8H9N5O2	3	0.5394	4244-47-7	8699.82	9196.74	7842.08	73310	74690.4	79770.5	1.35334	0.000558264	0.00635204	8.84937	3.14558	up
MEDL02650	Cyclomorusin	环桑皮素 A	Flavonoids	黄酮	Other Flavonoids	其它类黄酮	C25H22O6	3	0.5321	62596-34-3	67446.1	72226.1	67614.5	242307	260444	283332	1.35111	0.00330293	0.0177963	3.79225	1.92306	up
MEDL02219	5,7-Dihydroxy-3',4',5'-trimethoxyflavone	5,7-二羟基-3',4',5'-三甲氧基黄酮	Flavonoids	黄酮	Flavones	黄酮	C18H16O7	3	0.5312	18103-42-9	19341.7	15048.9	20102.7	4638.13	7801.1	6736.49	1.28329	0.00595166	0.0263209	0.351891	-1.5068	down
MW0123657	Dihydro-4-mercapto-3(2H)-furanone	Dihydro-4-mercapto-3(2H)-furanone	Others	其它类	Ketone compounds	酮类化合物	C4H6O2S	3	0.5227	56078-98-9	14709.7	11941.4	16818	8220.23	5026.2	8443.45	1.18749	0.017318	0.0566983	0.498973	-1.00297	down
MEDN0052	N6-Acetyl-L-lysine	N6-乙酰-L-赖氨酸	Amino acids and derivatives	氨基酸及其衍生物	Amino acids and derivatives	氨基酸及其衍生物	C8H16N2O3	3	0.518	692-04-6	349591	337493	352485	93756.4	85508.2	91343.5	1.3536	1.57642e-05	0.0012579	0.260308	-1.94171	down
MW0105254	4-Mercapto-5-methyl-3(2H)-thiophenone	4-巯基-5-甲基-3(2H)-噻吩酮	Others	其它类	Ketone compounds	酮类化合物	C5H6OS2	3	0.5178	26486-09-9	562.14	74.72	548.7	7749.33	8342.67	8808.21	1.25899	0.000176065	0.00340653	21.0029	4.39252	up
MEDN0498	D-Ribulose 5-phosphate	核酮糖-5-磷酸	Others	其它类	Saccharides	糖类	C5H11O8P	3	0.5172	4151-19-3	580.25	760.72	870.67	30517.1	30815.1	32716.6	1.35222	0.000425358	0.00548624	42.5245	5.41022	up
MW0000531	(10S,11S)-Pterosin C	蕨素 C	Terpenoids	萜类	Sesquiterpenoids	倍半萜	C14H18O3	3	0.5044	35938-43-3	5548.58	10878	4649.21	14446.5	16633.6	13509	1.13523	0.0385933	0.101086	2.11566	1.08111	up
MW0131753	Oroxylin A-7-o-beta-D-glucuronide	3，4，5-三羟基-6-[（5-羟基-6-甲氧基-4-氧代-2-苯基-4H-苯并吡喃-7-基）氧基]恶烷-2-羧酸	Organic acids	有机酸	Organic acids	有机酸	C22H20O11	2	0.9319	-	318819	332760	349395	79622.3	78429.6	88787.5	1.35187	0.00035488	0.00490866	0.246599	-2.01976	down
MW0009362	Pentylone	戊烯酮	Benzene and substituted derivatives	苯及其衍生物	Benzene and substituted derivatives	苯及其衍生物	C13H17NO3	2	0.9008	-	12933.7	17622.5	17656.2	48423.7	50386.6	56463.4	1.33078	0.000577233	0.00649237	3.22062	1.68734	up
MW0106482	Disuccinimidyl suberate	辛二酸二琥珀酰亚胺酯	Others	其它类	Lactones	内酯类化合物	C16H20N2O8	2	0.8924	-	180449	181560	178249	436381	466103	445829	1.35366	0.000934852	0.008584	2.49568	1.31943	up
MW0054380	Ethyl alpha-linolenate	亚麻酸乙酯	Lipids	脂质	Free fatty acids	游离脂肪酸	C20H34O2	2	0.8689	-	135228	143072	141532	282025	308858	311989	1.34892	0.00215887	0.0135145	2.15056	1.10471	up
MW0106757	h-gamma-Glu-leu-oh	h-γ-Glu-leu-oh	Amino acids and derivatives	氨基酸及其衍生物	Amino acids and derivatives	氨基酸及其衍生物	C11H20N2O5	2	0.8285	-	56594.5	48678.5	47977.7	100694	148018	110915	1.29707	0.0369198	0.097607	2.34666	1.23061	up
MW0116901	1-Benzylimidazole	1-苯并咪唑	Benzene and substituted derivatives	苯及其衍生物	Benzene and substituted derivatives	苯及其衍生物	C10H10N2	2	0.7862	-	79230.9	80029.8	6385.27	322134	225228	357773	1.06201	0.0100347	0.0387109	5.46427	2.45003	up
MW0126941	Vasicinone	伐西酮	Others	其它类	Ketone compounds	酮类化合物	C11H10N2O2	2	0.7817	-	118550	109857	90117.2	344127	290801	367499	1.33167	0.0048567	0.0228297	3.1471	1.65402	up
MW0009501	p-Phenetidine	对苯吡啶	Phenolic acids	酚酸类	Phenolic acids	酚酸类	C8H11NO	2	0.7778	-	93875.9	92112.9	94647.9	23848.7	27644.8	28551.8	1.3496	3.06233e-05	0.00164607	0.285227	-1.80982	down
MW0168472	2-(N-Morpholino)ethanesulfonic acid	2-(N-吗啉代)乙磺酸	Organic acids	有机酸	Organic acids	有机酸	C6H13NO4S	2	0.777	-	104885	120423	125664	435808	477690	480527	1.34945	0.000378593	0.0051063	3.9719	1.98983	up
MW0110307	L-Tyrosyl-L-Threonine	酪氨酰-苏氨酸	Amino acids and derivatives	氨基酸及其衍生物	Amino acids and derivatives	氨基酸及其衍生物	C13H18N2O5	2	0.7768	-	153991	147594	153922	42650.2	25188.1	32947.2	1.3289	0.000436631	0.00551172	0.22126	-2.17618	down
MEDN1835	alpha-Methylphenylalanine	α-甲基-DL-苯丙氨酸	Amino acids and derivatives	氨基酸及其衍生物	Amino acids and derivatives	氨基酸及其衍生物	C10H13NO2	2	0.7739	-	4288.39	5047.36	3489.45	19487.4	18789.6	18203.6	1.34085	2.06518e-05	0.00136997	4.40388	2.13877	up
MW0012860	3-Palmitoyl-sn-glycerol	1-单棕榈精	GL	甘油脂类	MG	单甘油酯	C19H38O4	2	0.7724	-	447069	139212	205932	88299.4	65244.4	57672.6	1.16231	0.172989	0.299655	0.266615	-1.90717	down
MW0131367	4H-1-Benzopyran-4-one, 7-(beta-D-glucopyranosyloxy)-3-(4-hydroxyphenyl)-	3-(4-羟基苯基)-7-{[3，4，5-三羟基-6-(羟甲基）恶烷-2-基]氧}-4H-色烯-4-酮	Others	其它类	Ketone compounds	酮类化合物	C21H20O9	2	0.7624	-	142415	135433	139269	44654.7	43016.4	40808.5	1.35324	2.19098e-05	0.00139655	0.308019	-1.69891	down
MW0125624	N-Acetylimidazole	1-乙酰咪唑	Heterocyclic compounds	杂环化合物	Heterocyclic compounds	杂环化合物	C5H6N2O	2	0.7503	-	96401.9	91641.6	88112.6	494378	362594	494679	1.34264	0.0145044	0.0499435	4.89452	2.29117	up
MW0001532	1-Benzylpiperazine	苄基哌嗪	Phenolic acids	酚酸类	Phenolic acids	酚酸类	C11H16N2	2	0.7476	-	1.02214e+06	997731	1.023e+06	2.1832e+06	2.26442e+06	2.37666e+06	1.35216	0.00163073	0.0115166	2.24271	1.16524	up
MW0001603	1-Hydroxy-2-naphthoic acid	1-羟基-2-萘甲酸; 1-羟基-2-萘甲酸; 1-萘酚-2-羧酸	Organic acids	有机酸	Organic acids	有机酸	C11H8O3	2	0.7344	-	20020.9	17454.4	18043.2	71699.5	74101.1	73736.3	1.35231	9.1751e-07	0.000458826	3.9543	1.98342	up
MW0106296	Cys-Lys	半胱氨酸-赖氨酸	Amino acids and derivatives	氨基酸及其衍生物	Amino acids and derivatives	氨基酸及其衍生物	C9H19N3O3S	2	0.7308	-	187704	224914	212462	569013	340908	628113	1.23434	0.0715826	0.15726	2.46054	1.29897	up
MW0168295	Prolyltryptophan	Pro Trp	Amino acids and derivatives	氨基酸及其衍生物	Amino acids and derivatives	氨基酸及其衍生物	C16H19N3O3	2	0.7237	-	63674.3	60613.1	63681.1	169060	133071	239082	1.28569	0.0631556	0.143507	2.87928	1.52571	up
MW0107851	Leu-Tyr	Leu-Tyr	Amino acids and derivatives	氨基酸及其衍生物	Amino acids and derivatives	氨基酸及其衍生物	C15H22N2O4	2	0.7198	-	12171.7	9210.34	11352.5	32253.7	32384.5	29758.8	1.33664	7.53429e-05	0.00226761	2.88371	1.52793	up
MEDP0060	Methionine sulfoxide	蛋氨酸亚砜	Amino acids and derivatives	氨基酸及其衍生物	Amino acids and derivatives	氨基酸及其衍生物	C5H11NO3S	2	0.7189	-	67335	122286	94547.9	46729.3	34447.5	22024.3	1.19144	0.0455201	0.11322	0.363168	-1.46129	down
MW0138460	Isobergapten	Isobergapten	Lignans and Coumarins	木脂素和香豆素	Coumarins	香豆素	C12H8O4	2	0.7161	-	4544.11	8635.06	5378.15	22670.3	15171.5	23207	1.26219	0.0176979	0.0574982	3.28974	1.71797	up
MEDP1473	2H-Pyran-2-one, tetrahydro-4-hydroxy-4-methyl-, (R)-	DL-甲羟戊酸内酯	Others	其它类	Lactones	内酯类化合物	C6H10O3	2	0.703	-	109679	116158	122640	739249	763316	764728	1.3541	1.29324e-05	0.00118414	6.50629	2.70183	up
MW0133680	4'-Hydroxyflavanone	4-羟基黄烷酮	Flavonoids	黄酮	Flavones	黄酮	C15H12O3	2	0.7011	-	7927.93	6359.22	6641.78	19588.9	17182.9	20469.2	1.33566	0.00180762	0.012241	2.73502	1.45155	up
MW0136625	6-Caffeoylsucrose	6-咖啡酰蔗糖	Benzene and substituted derivatives	苯及其衍生物	Benzene and substituted derivatives	苯及其衍生物	C21H28O14	3	0.9954	-	48603.2	37142.3	24458.6	1887.22	2691.76	14213.1	1.1563	0.0290162	0.0821577	0.170521	-2.55198	down
MW0011913	1,2-Dipalmitoleoyl-sn-glycero-3-phosphocholine	1,2-二棕榈油酰基-sn-甘油-3-磷酸胆碱	GP	甘油磷脂类	PC	磷脂酰胆碱	C40H76NO8P	3	0.9951	-	13248.2	10891.7	155.23	97508.7	181700	258703	1.09648	0.0655763	0.14736	22.1407	4.46863	up
MW0114089	cis-Ferulic acid [arabinosyl-(1->3)-[glucosyl-(1->6)]-glucosyl] ester	顺式-阿魏酸[阿拉伯糖基-(1->3)-[葡糖基-(1->6)]-葡糖基]酯	Organic acids	有机酸	Organic acids	有机酸	C27H38O18	3	0.9929	-	33971.5	50556.9	47449.8	139032	162986	149647	1.32582	0.000396308	0.00528039	3.42227	1.77495	up
MW0135704	6-{[2-(2,4-dihydroxyphenyl)-3-(3,7-dimethylocta-2,6-dien-1-yl)-8-(3-methylbut-2-en-1-yl)-4-oxo-4H-chromen-7-yl]oxy}-3,4,5-trihydroxyoxane-2-carboxylic acid	6-{[2-(2，4-二羟基苯基)-3-(3，7-二甲基辛-2，6-二烯-1-基)-7-羟基-8-(3-甲基丁-2-烯-1-基)-4-氧代-4H-苯并吡喃-6-基]氧}-3，4，5-三羟基恶烷-2-羧酸	Organic acids	有机酸	Organic acids	有机酸	C36H42O11	3	0.9891	-	23596.5	13026.1	6266.84	30036.3	32392.4	31252.3	1.03941	0.0758882	0.164012	2.18425	1.12714	up
MW0055605	PA(15:0/22:6(4Z,7Z,10Z,13Z,16Z,19Z))	PA(15:0/22:6(4Z,7Z,10Z,13Z,16Z,19Z))	GP	甘油磷脂类	PA	磷脂酸	C40H67O8P	3	0.9777	-	108468	108502	107506	594327	1.08008e+06	574936	1.32437	0.0603811	0.138266	6.93222	2.79332	up
MW0122462	2-(1,3-dimethyl-2,6-dioxo-1,2,3,6-tetrahydro-7H-purin-7-yl)-N-(4-isopropylphenyl)acetamide	2-(1,3-二甲基-2,6-二氧代-1,2,3,6-四氢-7H-嘌呤-7-基)-N-(4-异丙基苯基)乙酰胺	Alcohol and amines	醇、胺类	Amines	胺类	C18H21N5O3	3	0.9733	-	1.38158e+06	1.26187e+06	1.25441e+06	2.70212e+06	3.02695e+06	3.02226e+06	1.3451	0.00167094	0.011693	2.24516	1.16682	up
MW0103884	(2S,3'S)-alpha-Amino-2-carboxy-5-oxo-1-pyrrolidinebutanoic acid	(2S,3'S)-α-氨基-2-羧基-5-氧代-1-吡咯烷丁酸	Organic acids	有机酸	Organic acids	有机酸	C9H14N2O5	3	0.9565	-	19265.8	22761	24153.4	53444.8	49700.2	54337.1	1.33643	0.000116307	0.00271983	2.3796	1.25072	up
MW0061833	PIP(16:0/18:2(9Z,12Z))	PIP(16:0/18:2(9Z,12Z))	GP	甘油磷脂类	PI-P	磷脂酰肌醇磷酸	C43H80O16P2	3	0.9443	-	168416	179976	170664	67115.8	73892.7	69499.6	1.35091	9.62789e-05	0.00251072	0.405559	-1.30202	down
MW0052520	Elatoside E	Elatoside E	Terpenoids	萜类	Triterpene Saponin	三萜皂苷	C46H74O16	3	0.9386	-	16272.5	17129.7	15079.3	1377.89	1401.45	6528.26	1.19532	0.0101783	0.0390149	0.191982	-2.38095	down
MEDL00326	DL-Arginine	DL-精氨酸	Amino acids and derivatives	氨基酸及其衍生物	Amino acids and derivatives	氨基酸及其衍生物	C6H14N4O2	3	0.9361	-	121518	138655	128670	775360	794727	378274	1.29207	0.0617026	0.140685	5.01065	2.325	up
MW0055602	PA(15:0/22:4(7Z,10Z,13Z,16Z))	PA(15:0/22:4(7Z,10Z,13Z,16Z))	GP	甘油磷脂类	PA	磷脂酸	C40H71O8P	3	0.9147	-	1.42764e+06	1.49566e+06	2.81918e+06	63470.6	44906.9	753129	1.11469	0.0497953	0.120431	0.150024	-2.73674	down
MW0011786	1-(13Z,16Z-docosadienoyl)-glycero-3-phosphate	1-(13Z,16Z-二十二碳二烯酰基)-甘油-3-磷酸	GP	甘油磷脂类	PA	磷脂酸	C25H47O7P	3	0.9053	-	6663.78	3547.39	7139.74	15099.2	14910.4	15220.2	1.2383	0.0139333	0.0484386	2.60677	1.38226	up
MEDTP01862	MG(18:4/0:0/0:0)	MG(18:4/0:0/0:0)	GL	甘油脂类	MG	单甘油酯	C21H34O4	3	0.8919	-	997186	968354	1.01686e+06	3.07261e+06	3.24831e+06	3.20003e+06	1.354	0.000261743	0.00421186	3.19238	1.67463	up
MW0025806	CL(8:0/8:0/8:0/10:0)	CL(8:0/8:0/8:0/10:0)	GL	甘油脂类	CL	双磷酸甘油酯	C43H82O17P2	3	0.8881	-	39958	34197.2	32607.8	16774	17130.9	16652.1	1.33669	0.0136235	0.0477189	0.473544	-1.07843	down
MW0130245	2-(3-hydroxyphenyl)-4-[3,5,7-trihydroxy-2-(4-hydroxy-3-methoxyphenyl)-3,4-dihydro-2H-1-benzopyran-8-yl]-6-[3,4,5-trihydroxy-6-(hydroxymethyl)oxan-2-yl]-3,4-dihydro-2H-1-benzopyran-3,5,7-triol	2-(3-羟基苯基)-4-[3，5，7-三羟基-2-(4-羟基-3-甲氧基苯基)-3，4-二氢-2H-1-苯并吡喃-8-基]-6-[3，4，5-三羟基-6-(羟甲基）恶烷-2-基]-3，4-二氢-2H-1-苯并吡喃-3，5，7-三醇	Benzene and substituted derivatives	苯及其衍生物	Benzene and substituted derivatives	苯及其衍生物	C37H38O16	3	0.8817	-	159.87	1203.01	120.54	5542.92	4293.63	3928.51	1.19803	0.00342344	0.0181384	9.27927	3.21401	up
MW0103413	6-Mercaptopurine ribonucleoside 5'-diphosphate	6-巯基嘌呤核苷5-二磷酸	Nucleotides and derivatives	核苷酸及其衍生物	Nucleotides and derivatives	核苷酸及其衍生物	C10H14N4O10P2S	3	0.881	-	27.86	26.23	41.09	2449.65	3029.91	3207.39	1.3515	0.00630508	0.027381	91.2686	6.51205	up
MW0112462	3,4,5-trihydroxy-6-[2-hydroxy-3,4-dimethoxy-5-(3-oxopropyl)phenoxy]oxane-2-carboxylic acid	3，4，5-三羟基-6-[2-羟基-3，4-二甲氧基-5-(3-氧代丙基）苯氧基]恶烷-2-羧酸	Organic acids	有机酸	Organic acids	有机酸	C17H22O11	3	0.8798	-	60006.9	55104	58325.2	10710.5	9214.38	10779.9	1.35209	0.000267202	0.00426801	0.177038	-2.49787	down
MW0104274	1-Hydroxyoct-2-enoylglycine	1-hydroxyoct-3-enoylglycine	Amino acids and derivatives	氨基酸及其衍生物	Amino acids and derivatives	氨基酸及其衍生物	C10H17NO4	3	0.8778	-	48833.4	50072	53546.7	152600	164321	163063	1.35232	0.000307812	0.00456793	3.14842	1.65463	up
MW0105162	4,5-Dihydro-4-hydroxy-5-S-glutathionyl-benzo[a]pyrene	4,5-二氢-4-羟基-5-S-谷胱甘肽-苯并[a]芘	Amino acids and derivatives	氨基酸及其衍生物	Amino acids and derivatives	氨基酸及其衍生物	C30H29N3O7S	3	0.8727	-	3.9907e+06	3.80753e+06	3.69468e+06	1.07432e+06	1.20803e+06	1.29789e+06	1.34802	3.05777e-05	0.00164607	0.311518	-1.68261	down
MW0132179	3,4,5-trihydroxy-6-{[5-methoxy-2,2-dimethyl-6-(3-oxo-3-phenylprop-1-en-1-yl)-2H-chromen-7-yl]oxy}oxane-2-carboxylic acid	6-{[2,2-二甲基-6-(3-氧代-3-苯基丙-1-烯-1-基)-2H-铬-5-基]氧基} -3,4,5-三羟基氧烷-2 -羧酸	Organic acids	有机酸	Organic acids	有机酸	C27H28O10	3	0.8642	-	13554.3	9868.11	8500.94	89435.6	104149	89307.6	1.34294	0.00173614	0.0119815	8.8616	3.14757	up
MW0105021	3-hydroxy-2-methyl-2-[(sulfooxy)methyl]propanoic acid	3-羟基-2-甲基-2-[（磺氧基）甲基]丙酸	Organic acids	有机酸	Organic acids	有机酸	C5H10O7S	3	0.8557	-	3447.25	225.48	47.29	22799.9	24553.1	25065.6	1.16889	0.000205849	0.00371728	19.4672	4.28298	up
MW0134395	5-{5-[(E)-2-(3,5-dihydroxyphenyl)ethenyl]-4-hydroxy-2-(4-hydroxyphenyl)-2,3-dihydro-1-benzofuran-3-yl}benzene-1,3-diol	5-{5-[（E)-2-(3,5-二羟苯基）乙烯基]-4-羟基-2-(4-羟基苯基)-2,3-二氢-1-苯并呋喃-3-基]-苯-1,3-二醇	Benzene and substituted derivatives	苯及其衍生物	Benzene and substituted derivatives	苯及其衍生物	C28H22O7	3	0.8549	-	131775	138694	197641	45142	45694.9	46326.3	1.32566	0.034033	0.0920335	0.293015	-1.77095	down
MW0055603	PA(15:0/22:5(4Z,7Z,10Z,13Z,16Z))	PA(15:0/22:5(4Z,7Z,10Z,13Z,16Z))	GP	甘油磷脂类	PA	磷脂酸	C40H69O8P	3	0.8515	-	3959.81	2768.55	1512.47	13676.8	15402.5	13639	1.28638	0.00028568	0.00444555	5.18375	2.374	up
MEDP0798	1-Naphthylamine	1-萘胺	Alkaloids	生物碱	Alkaloids	生物碱	C10H9N	3	0.8495	-	86606.9	88756.3	88168.2	322695	363979	356886	1.35293	0.00234333	0.0142908	3.95991	1.98547	up
MEDP1686	1-Pentadecanoyl-glycero-3-phosphoethanolamine	LPE(15:0/0:0)	Lipids	脂质	LPC	溶血磷脂酰胆碱	C20H42NO7P	3	0.8048	-	2164.09	3121.8	3177.26	1127.31	1406.54	958.17	1.26641	0.0247906	0.0732562	0.412615	-1.27713	down
MW0131564	3,4,5-Trihydroxy-6-[5-hydroxy-4-oxo-6-[3,4,5-trihydroxy-6-(hydroxymethyl)oxan-2-yl]-2-(2,4,5-trihydroxyphenyl)chromen-7-yl]oxyoxane-2-carboxylic acid	3，4，5-三羟基-6-({5-羟基-4-氧代-6-[3，4，5-三羟基-6-(羟甲基）恶烷-2-基]-2-(2，4，5三羟基苯基)-4H-色烯-7-基}氧基）恶烷-2-羧酸	Organic acids	有机酸	Organic acids	有机酸	C27H28O18	3	0.8025	-	17636.3	7596.09	12901.8	2635.54	2458.53	1687.69	1.28527	0.067707	0.150896	0.177839	-2.49135	down
MW0136556	6-{5-[3-(2,4-dihydroxyphenyl)-3-[2-(3,4-dihydroxyphenyl)-3,5,7-trihydroxy-3,4-dihydro-2H-1-benzopyran-8-yl]-2-hydroxypropyl]-2-hydroxyphenoxy}-3,4,5-trihydroxyoxane-2-carboxylic acid	6-{5-[3-(2,4-二羟苯基)-3-[2-(3,4-二羟苯基)-3,5,7-三羟基-3,4-二氢-2H-1-苯并吡喃-8-基]-2-羟丙基]-2-羟基苯氧基]-3,4,5-三羟基氧烷-2-羧酸	Organic acids	有机酸	Organic acids	有机酸	C36H36O17	3	0.7911	-	602918	661323	596589	97252.4	54742	78766	1.33763	0.000105441	0.00260636	0.124009	-3.01148	down
MEDP1022	2-[(2-Amino-3-hydroxybutanoyl)amino]-3-phenylpropanoic acid	苏氨酸-苯丙氨酸	Amino acids and derivatives	氨基酸及其衍生物	Amino acids and derivatives	氨基酸及其衍生物	C13H18N2O4	3	0.7903	-	17447.6	14777	17704.8	10220.1	4659.23	6089.87	1.20365	0.0133419	0.0469602	0.419978	-1.25162	down
MW0112109	2-Decarboxybetanin	2-脱羧甜菜碱	Others	其它类	Others	其它	C23H27N2O11	3	0.7903	-	100215	105752	99329.2	43929.6	35201.4	40923.5	1.34089	6.79742e-05	0.00214515	0.393239	-1.34652	down
MW0009811	Sulfinpyrazone sulfone	磺吡酮砜	Benzene and substituted derivatives	苯及其衍生物	Benzene and substituted derivatives	苯及其衍生物	C23H20N2O4S	3	0.7884	-	123220	98339.9	103161	281736	307776	279246	1.33935	0.000132167	0.00290516	2.6754	1.41975	up
MW0012773	1-arachidonoyl-sn-glycero-3-phospho-1D-myo-inositol	1-花生四烯酸-sn-glycero-3-phospho-1D-myo-inositol	GP	甘油磷脂类	PI	磷脂酰肌醇	C29H49O12P	3	0.7882	-	1368.55	424.56	54.81	10773	6314.04	3417.26	1.12388	0.0962562	0.194457	11.0959	3.47196	up
MW0129217	{3-[8-(5,7-dihydroxy-4-oxo-2-phenyl-3,4-dihydro-2H-1-benzopyran-3-yl)-5,7-dihydroxy-4-oxo-3,4-dihydro-2H-1-benzopyran-2-yl]phenyl}oxidanesulfonic acid	{3-[8-(5，7-二羟基-4-氧代-2-苯基-3，4-二氢-2H-1-苯并吡喃-3-基)-5，7-二羟基-4-氧代-3，4-二氢-2H-1-苯并吡喃-2-基]苯基}氧代磺酸	Organic acids	有机酸	Organic acids	有机酸	C30H22O12S	3	0.7741	-	3190.73	2465.23	2127.95	297.18	58.47	225.01	1.271	0.0132566	0.0467359	0.0745975	-3.74473	down
MW0057109	PC(18:3(6Z,9Z,12Z)/P-16:0)	PC(18:3(6Z,9Z,12Z)/P-16:0)	GP	甘油磷脂类	PC	磷脂酰胆碱	C42H78NO7P	3	0.7647	-	15267.6	34796.1	37321.8	14098.2	915.25	180.2	1.02498	0.0532848	0.126149	0.173869	-2.52393	down
MW0129321	[4-[5,7-Dihydroxy-8-(3-methylbut-2-enyl)-4-oxo-2,3-dihydrochromen-3-yl]-2-hydroxy-6-(3-methylbut-2-enyl)phenyl] hydrogen sulate	{4-[5，7-二羟基-8-(3-甲基丁-2-烯-1-基)-4-氧代-3，4-二氢-2H-1-苯并吡喃-3-基]-2-羟基-6-(3-甲基丁-2-烯-1-基）苯基}氧代磺酸	Organic acids	有机酸	Organic acids	有机酸	C25H28O9S	3	0.7627	-	64949.4	68884.5	56723.8	155942	165801	172208	1.3428	0.000113313	0.00271512	2.59213	1.37414	up
MW0128910	{[(2Z)-2-{2-[2-(2,4-dihydroxyphenyl)-7-hydroxy-4-oxo-4H-chromen-3-yl]ethylidene}-6-methylhept-5-en-1-yl]oxy}sulfonic acid	{[（2Z)-2-{2-[2-(2，4-二羟基苯基)-7-羟基-4-氧代-4H-苯并吡喃-3-基]亚乙基}-6-甲基庚-5-烯-1-基]氧基}磺酸	Organic acids	有机酸	Organic acids	有机酸	C25H26O9S	3	0.7579	-	30247.4	29612	30383.8	72665.6	72312.8	83292.5	1.34799	0.00590281	0.0262011	2.52951	1.33886	up
MW0061098	PG(16:0/20:3(5Z,8Z,11Z))	PG(16:0/20:3(5Z,8Z,11Z))	GP	甘油磷脂类	PG	磷脂酰甘油	C42H77O10P	3	0.7545	-	536.73	3227.75	9367.42	59852.9	68657.8	63905.6	1.20405	8.16162e-05	0.0023069	14.6526	3.87308	up
MW0135852	6-[[2-[4-[3-[3,4-dihydroxy-4-(1H-indole-3-carbonyloxymethyl)oxolan-2-yl]oxy-4,5-dihydroxy-6-(hydroxymethyl)oxan-2-yl]oxyphenyl]-4-oxo-2,3-dihydrochromen-7-yl]oxy]-3,4,5-trihydroxyoxane-2-carboxylic acid	6-{[2-(4-{[3-({3，4-二羟基-4-[（1H-吲哚-3-羰氧基）甲基]氧杂环戊烷-2-基}氧基)-4，5-二羟基-6-(羟甲基）氧杂-2-基]氧基}苯基)-4-氧代-3，4-二氢-2H-1-苯并吡喃-7-基]氧基}-3，4，5-三羟基氧杂-2-羧酸	Organic acids	有机酸	Organic acids	有机酸	C41H43NO20	3	0.7485	-	681.1	1264.22	1333.94	4821.82	4591.62	3406.97	1.28076	0.00842312	0.0342417	3.90954	1.967	up
MW0000106	7-Formyldehydrothalicsimidine	7-甲酰基脱氢噻嘧啶	Alkaloids	生物碱	Alkaloids	生物碱	C23H25NO6	3	0.7466	-	65862.9	176218	122620	276274	360055	367419	1.18394	0.00804338	0.0330949	2.75225	1.46061	up
MW0061633	Physalin I	酸浆苦味素 I	Steroids	甾体	Steroid	甾体	C29H34O11	3	0.745	-	20595.5	23788	9499.37	129682	132652	136788	1.30633	0.00021763	0.0038446	7.40722	2.88893	up
MW0118866	2-Pyridinecarboxaldehyde	2-吡啶甲醛	Heterocyclic compounds	杂环化合物	Heterocyclic compounds	杂环化合物	C6H5NO	3	0.7429	-	67864.5	66316.2	63163.2	17815.2	36097.3	37749.1	1.16415	0.0268526	0.0777243	0.464477	-1.10632	down
MW0115268	Semilepidinoside A	半萜甙A	Benzene and substituted derivatives	苯及其衍生物	Benzene and substituted derivatives	苯及其衍生物	C16H20N2O6	3	0.7415	-	5542.23	4734.27	5096.13	374.38	800.9	643.26	1.32559	0.000397187	0.00528039	0.118297	-3.07951	down
MW0004507	1-(4-Hydroxy-3-methoxyphenyl)-4-decene-3-ol	4-[（4E)-3-羟基十二烷基-4-烯-1-基]-2-甲氧基苯酚	Phenolic acids	酚酸类	Phenolic acids	酚酸类	C17H26O3	3	0.7408	-	486135	264664	380891	133325	149843	163382	1.25294	0.06774	0.150918	0.394587	-1.34159	down
MW0130071	2-(2,5-Dihydroxy-4-methoxyphenyl)-5-hydroxy-7-methoxy-6-[3,4,5-trihydroxy-6-(hydroxymethyl)oxan-2-yl]chromen-4-one	2-(2，5-二羟基-4-甲氧基苯基)-5-羟基-7-甲氧基-6-[3，4，5-三羟基-6-(羟甲基）恶烷-2-基]-4H-苯并吡喃-4-酮	Others	其它类	Ketone compounds	酮类化合物	C23H24O12	3	0.7388	-	55960.4	68086.4	63717	27499.1	18893.9	31039.3	1.27717	0.00190182	0.0125648	0.412392	-1.27791	down
MW0112382	3,4,5-trihydroxy-6-(2-oxoethoxy)oxane-2-carboxylic acid	3,4,5-三羟基-6-(2-氧代乙氧基）氧烷-2-羧酸	Organic acids	有机酸	Organic acids	有机酸	C8H12O8	3	0.7366	-	36443.5	37858.8	37153.9	15288.9	14891.4	14318.9	1.35338	5.05721e-06	0.000949365	0.399253	-1.32463	down
MW0013478	2-Hexaprenyl-6-methoxy-1,4-benzoquinone	2-己异戊烯基-6-甲氧基-1，4-苯醌	Benzene and substituted derivatives	苯及其衍生物	Benzene and substituted derivatives	苯及其衍生物	C37H54O3	3	0.7333	-	28874.7	32542.9	33774.9	66531.8	66322.4	69919.6	1.34331	6.45115e-05	0.00212651	2.13014	1.09095	up
MW0104470	Triethylene glycol dimethacrylate	三甘醇二甲基丙烯酸酯	Others	其它类	Lactones	内酯类化合物	C14H22O6	3	0.7279	-	21538	23878.4	4064.29	53717.3	38878.1	54301.4	1.01798	0.0169902	0.056107	2.96877	1.56987	up
MW0061676	1-hexadecanoyl-2-(9Z-hexadecenoyl)-glycero-3-phospho-(1'-myo-inositol)	PI(16:0/16:2(9Z,12Z))	GP	甘油磷脂类	PI	磷脂酰肌醇	C41H77O13P	3	0.7263	-	36098.3	28644.6	14063.9	4786.81	1647.36	789.17	1.23096	0.0617406	0.140685	0.0916588	-3.44758	down
MW0136081	6-{[7-({6-[(acetyloxy)methyl]-3-{[3,4-dihydroxy-4-(hydroxymethyl)oxolan-2-yl]oxy}-4,5-dihydroxyoxan-2-yl}oxy)-2-(4-hydroxyphenyl)-4-oxo-4H-chromen-5-yl]oxy}-3,4,5-trihydroxyoxane-2-carboxylic acid	6-{[7-({6-[（乙酰氧基）甲基]-3-{[3，4-二羟基-4-(羟甲基）氧杂环戊烷-2-基]氧基}-4，5-二羟基氧杂环戊烷-2-基}氧基)-2-(4-羟基苯基)-4-氧代-4H-苯并吡喃-5-基]氧基}-3，4，5-三羟基氧杂环己烷-2-羧酸	Organic acids	有机酸	Organic acids	有机酸	C34H38O21	3	0.7257	-	14288.9	19917.4	16298.5	41083	37425.5	34484.5	1.30884	0.00128204	0.0101641	2.23727	1.16174	up
MW0123366	Citbismine F	花旗松F	Heterocyclic compounds	杂环化合物	Heterocyclic compounds	杂环化合物	C36H34N2O10	3	0.7256	-	9376.49	5345.15	17310	33497.2	18488.6	35723.2	1.08952	0.0542622	0.12795	2.7382	1.45323	up
MW0007559	Mebeverine	美贝维林	Benzene and substituted derivatives	苯及其衍生物	Benzene and substituted derivatives	苯及其衍生物	C25H35NO5	3	0.723	-	13938.8	12290.1	12035.8	29719.7	31674.9	29748.9	1.34583	3.85427e-05	0.00171621	2.38192	1.25213	up
MW0141708	1-Cyclohexene-1-carboxylic acid	1-环己烯羧酸;环己-1-烯羧酸; 1-环己烯-1-羧酸	Organic acids	有机酸	Organic acids	有机酸	C7H10O2	3	0.7215	-	116624	126609	127770	40927.3	42817.8	49574.1	1.34424	9.94735e-05	0.00254597	0.359347	-1.47655	down
MW0130762	2-hydroxy-1,7-diphenylheptan-3-one	2-羟基-1，7-二苯基庚烷-3-酮	Others	其它类	Ketone compounds	酮类化合物	C19H22O2	3	0.7169	-	11134.6	9787.83	10314.6	33441.7	78306.9	24866.4	1.20666	0.16806	0.29354	4.37349	2.12878	up
mws4556_P	2,6-Diamino-5-hydroxyhexanoic acid	5-羟基-DL-赖氨酸	Amino acids and derivatives	氨基酸及其衍生物	Amino acids and derivatives	氨基酸及其衍生物	C6H14N2O3	3	0.7163	-	2176.06	4266.39	2904.12	4594.76	10915.8	9660.43	1.1145	0.100909	0.201293	2.69307	1.42925	up
MW0137304	CID 44256852	货号 44256852	Benzene and substituted derivatives	苯及其衍生物	Benzene and substituted derivatives	苯及其衍生物	C39H43O20+	3	0.7143	-	15188.8	26249.6	16212.5	13180.9	7268.63	6578.59	1.10235	0.0820934	0.17322	0.468824	-1.09288	down
MW0159316	1-[3alpha,17beta-Bis(acetyloxy)-2beta-(1-piperidinyl)-5alpha-androstan-16-yl]-1-methylpiperidinium	1-[3α,17β-双(乙酰氧基)-2β-(1-哌啶基)-5α-androstan-16-yl]-1-甲基哌啶鎓	Others	其它类	Lactones	内酯类化合物	C34H57N2O4+	3	0.714	-	6702.98	4825.1	6602.81	1058.92	1987.49	3117.08	1.17716	0.00945288	0.0372552	0.339944	-1.55663	down
MW0121652	5-methyltetrahydropteroyltri-L-glutamate	5-甲基四氢蝶酰基三-L-谷氨酸	Amino acids and derivatives	氨基酸及其衍生物	Amino acids and derivatives	氨基酸及其衍生物	C30H39N9O12	3	0.7105	-	24748.1	20527.6	18450.7	56110.3	61010.4	64026.2	1.33358	0.0002477	0.00408705	2.84257	1.5072	up
MW0111548	[4,5-dihydroxy-2-(hydroxymethyl)-6-(2,4,6-trihydroxyphenyl)oxan-3-yl]oxidanesulfonic acid	[4，5-二羟基-2-(羟甲基)-6-(2，4，6-三羟基苯基）恶烷-3-基]氧代磺酸	Organic acids	有机酸	Organic acids	有机酸	C12H16O11S	3	0.7066	-	94.43	91.47	128.44	717.19	849.75	742.51	1.34542	0.00200717	0.0129066	7.34698	2.87715	up
MW0130371	2,3-bis(3-hydroxyphenyl)-4-[(E)-2-phenylethenyl]-2,3-dihydro-1-benzofuran-6-ol	2，3-双（3-羟基苯基)-4-[（E)-2-苯基乙烯基]-2，3-二氢-1-苯并呋喃-6-醇	Benzene and substituted derivatives	苯及其衍生物	Benzene and substituted derivatives	苯及其衍生物	C28H22O4	3	0.7043	-	26437.3	36438.5	50706.8	3977.15	11326.2	9531.59	1.22368	0.0420276	0.10761	0.218651	-2.1933	down
MW0114034	3-[[4-[2-[1-[(2S,3R,4R,5R)-6-carboxy-3,4,5-trihydroxyoxan-2-yl]tetrazol-5-yl]phenyl]phenyl]methyl]-2-ethoxybenzimidazole-4-carboxylic acid	3-[[4-[2-[1-[(2S,3R,4R,5R)-6-carboxy-3,4,5-trihydroxyoxan-2-yl]tetrazol-5-yl]phenyl]phenyl]methyl]-2-ethoxybenzimidazole-4-carboxylic acid	Steroids	甾体	Steroid	甾体	C30H28N6O9	3	0.7028	-	53338.8	54770.5	39528.8	12555.5	13421.3	17142.8	1.32072	0.0134281	0.0472124	0.292063	-1.77565	down
MW0132083	3,4,5-trihydroxy-6-{[3-hydroxy-2-(4-hydroxyphenyl)-4-oxo-7-[(3,4,5-trihydroxy-6-methyloxan-2-yl)oxy]-4H-chromen-5-yl]oxy}oxane-2-carboxylic acid	3，4，5-三羟基-6-{[3-羟基-2-(4-羟基苯基)-4-氧代-7-[（3，4，5-三羟基-6-甲基氧烷-2-基）氧]-4H-色烯-5-基]氧}氧烷-2-羧酸	Organic acids	有机酸	Organic acids	有机酸	C27H28O16	3	0.7006	-	113.59	49.32	127.58	401.33	222.14	829.37	1.14781	0.162261	0.286258	5.00134	2.32232	up
MW0128614	CID 78055824	[2-羟基-5-(3，5，7-三羟基-3，4-二氢-2H-1-苯并吡喃-2-基）苯基]氧代磺酸	Organic acids	有机酸	Organic acids	有机酸	C15H14O9S	3	0.6994	-	8140.57	4814.92	6576.75	378.47	2338.7	1141.67	1.1634	0.0153755	0.0521964	0.197563	-2.33962	down
MW0157029	Ser-Trp	L-丝氨酸-L-色氨酸	Amino acids and derivatives	氨基酸及其衍生物	Amino acids and derivatives	氨基酸及其衍生物	C14H17N3O4	3	0.6965	-	3380.72	2991.71	5107.6	32466	37756.9	34690.9	1.34006	0.000624015	0.00680657	9.13881	3.19201	up
MW0128263	(6-{3-[3-(3,4-dihydroxyphenyl)propanoyl]-2,4,6-trihydroxyphenyl}-4,5-dihydroxy-2-(hydroxymethyl)oxan-3-yl)oxidanesulfonic acid	（6-{3-[3-(3，4-二羟基苯基）丙酰基]-2，4，6-三羟基苯基}-4，5-二羟基-2-(羟甲基）恶烷-3-基）氧代磺酸	Organic acids	有机酸	Organic acids	有机酸	C21H24O14S	3	0.6956	-	90597.2	86709.7	77856.2	15057.5	41329.6	45525.3	1.11171	0.0214553	0.0658549	0.399401	-1.32409	down
MW0133634	4-hydroxy-1,7-bis(3-methoxyphenyl)hept-1-ene-3,5-dione	3，4，5-三羟基-6-[（3-甲基-2-氧代-4-苯基-3-丁烯-1-基）氧基]恶烷-2-羧酸	Others	其它类	Ketone compounds	酮类化合物	C21H22O5	3	0.695	-	50986.1	41818.6	37977.4	82452.7	94287.9	113078	1.29132	0.015482	0.0524646	2.21604	1.14798	up
MW0128607	[8-(2-hydroxy-1-sulooxypropan-2-yl)-2-oxo-8,9-dihydrouro[2,3-h]chromen-9-yl] (E)-2-methylbut-2-enoate	[2-羟基-2-(9-{[（2E)-2-甲基丁-2-烯酰基]氧基}-2-氧代-2H，8H，9H-呋喃并[2，3-h]苯并吡喃-8-基）丙氧基]磺酸	Organic acids	有机酸	Organic acids	有机酸	C19H20O10S	3	0.6938	-	77742.7	68606	98091.8	13531	16673.2	17824.7	1.3369	0.0156534	0.0528364	0.196485	-2.34751	down
MW0000653	3'-Carbamoyl-[1,1'-biphenyl]-3-yl cyclohexylcarbamate	3'-氨基甲酰基-[1,1'-联苯]-3-基环己基氨基甲酸酯	Benzene and substituted derivatives	苯及其衍生物	Benzene and substituted derivatives	苯及其衍生物	C20H22N2O3	3	0.6936	-	2260.91	2350.19	1736.7	21762.7	25393.6	28502.1	1.34832	0.0066155	0.0284628	11.9188	3.57517	up
MW0106028	beta-Alanyl-L-lysine	B-丙氨酸-赖氨酸	Amino acids and derivatives	氨基酸及其衍生物	Amino acids and derivatives	氨基酸及其衍生物	C9H19N3O3	3	0.6924	-	184857	154225	158983	596012	677797	666513	1.34797	0.00100356	0.00887935	3.89572	1.96189	up
MW0012778	1-Docosanoyl-sn-glycero-3-phosphocholine	1-Behenoyl-2-hydroxy-sn-glycero-3-phosphocholine	GP	甘油磷脂类	PC	磷脂酰胆碱	C30H62NO7P	3	0.6886	-	9960.9	11902.9	10176	25072.5	20947.6	19913.1	1.31485	0.0106256	0.0402734	2.05785	1.04114	up
MEDN1106	Flavanone	黄烷酮	Flavonoids	黄酮	Flavanones	二氢黄酮	C15H12O2	3	0.6878	-	53037.3	35964	48672.9	19590.4	18288.2	15898.9	1.30305	0.02761	0.0791412	0.390615	-1.35618	down
MW0130459	Methyl 2,5-dihydroxycinnamate	2，5-二羟基肉桂酸甲酯	Organic acids	有机酸	Organic acids	有机酸	C10H10O4	3	0.685	-	6186.39	6330.34	6206.87	891.59	285.8	232.27	1.29733	0.000874477	0.00820342	0.0752879	-3.73144	down
MW0139960	Wuweizisu C	五味子素C	Lignans and Coumarins	木脂素和香豆素	Lignans	木脂素	C22H24O6	3	0.6834	-	78238.7	56219.7	61190.8	161160	184813	183172	1.32411	0.000430403	0.00550064	2.70456	1.43539	up
MW0134860	6-(2-{5,7-dihydroxy-3-[(2Z)-4-hydroxy-3-(4-methylpent-3-en-1-yl)but-2-en-1-yl]-6-(3-methylbut-2-en-1-yl)-4-oxo-3,4-dihydro-2H-1-benzopyran-2-yl}-5-hydroxyphenoxy)-3,4,5-trihydroxyoxane-2-carboxylic acid	6-(2-{5，7-二羟基-3-[（2Z)-4-羟基-3-(4-甲基戊-3-烯-1-基)-2-丁-1-基]-6-(3-甲基丁-2-烯-1-基)-4-氧代-3，4-二氢-2H-1-苯并吡喃-2-基}-5-羟基苯氧基)-3，4，5-三羟基恶烷-2-羧酸	Organic acids	有机酸	Organic acids	有机酸	C36H44O13	3	0.682	-	25.4	451.65	250.85	1037.96	1462.83	1154.48	1.04493	0.00526381	0.0242352	5.02167	2.32817	up
MW0003439	3-(3,4-dihydroxyphenyl)-N-(2-(3,4-dihydroxyphenyl)ethyl)propanamide	3-(3,4-二羟苯基)-N-[2-(3,4-二羟苯基）乙基]丙胺酸	Phenolic acids	酚酸类	Phenolic acids	酚酸类	C17H19NO5	3	0.6813	-	10792.4	7594.34	9972.2	1312.98	1941.41	3746.75	1.24178	0.00508734	0.0236124	0.246876	-2.01814	down
MW0137135	8,16-Dihydroxy-6-(6-hydroxy-1-benzouran-2-yl)-12-methyl-3,13-dioxapentacyclo[10.7.1.02,10.04,9.014,19]icosa-2(10),4,6,8,14(19),15,17-heptaen-11-one	8,16-二羟基二十碳四烯酸	Lipids	脂质	Free fatty acids	游离脂肪酸	C27H18O7	3	0.6805	-	49470.6	26579.3	65176.5	402440	316201	378111	1.31105	0.00220944	0.0137095	7.76591	2.95716	up
MW0001005	{[1-(4-hydroxy-3-methoxyphenyl)-3-oxobutan-2-yl]oxy}sulfonic acid	{[1-(4-羟基-3-甲氧基苯基)-3-氧代丁烷-2-基]氧基}磺酸	Phenolic acids	酚酸类	Phenolic acids	酚酸类	C11H14O7S	3	0.6802	-	3036.46	2497.5	3302.82	10492.6	10079.2	11836.2	1.34048	0.00130791	0.010269	3.6674	1.87476	up
MW0134899	CID 74977692	6-(3,4-二羟基-6-甲基-5-氧杂恶烷-2-基)-5,7-二羟基-2-(4-羟基-3-甲氧基苯基)-4H-铬-4-	Others	其它类	Ketone compounds	酮类化合物	C22H20O10	3	0.6794	-	10225.1	13750.3	15534.6	2203.71	1820.72	1507.32	1.33593	0.0171429	0.0564569	0.140009	-2.83641	down
MW0000244	Emetan, 6',7',10,11-tetramethoxy-	Emetan, 6',7',10,11-四甲氧基-	Benzene and substituted derivatives	苯及其衍生物	Benzene and substituted derivatives	苯及其衍生物	C29H40N2O4	3	0.6778	-	63681.9	36382.4	50465.4	2591.9	20258.2	18871.5	1.02125	0.0239769	0.0714035	0.277165	-1.85118	down
MW0111778	(3-Amino-5-methyl-1-adamantyl)methanol	(3-氨基-5-甲基-1-金刚烷基)甲醇	Alcohol and amines	醇、胺类	Amines	胺类	C12H21NO	3	0.6769	-	23209.1	25798.3	27887.1	57712.8	74169.1	54074.9	1.31439	0.0234226	0.0703326	2.41834	1.27402	up
MW0135707	6-{[2-(2,4-dihydroxyphenyl)-3-(3-hydroxy-3-methylbutyl)-8,8-dimethyl-4-oxo-4H,8H-pyrano[2,3-f]chromen-5-yl]oxy}-3,4,5-trihydroxyoxane-2-carboxylic acid	6-{[2-(2，4-二羟基苯基)-3-(3-羟基-3-甲基丁基)-8，8-二甲基-4-氧代-4H，8H-吡喃并[2，3-f]苯并吡喃-5-基]氧}-3，4，5-三羟基氧杂环己烷-2-羧酸	Organic acids	有机酸	Organic acids	有机酸	C31H34O13	3	0.6764	-	137015	145443	139900	599243	634723	677014	1.35314	0.00184086	0.0123886	4.52455	2.17778	up
MW0135380	6-[2-(6-carboxy-5-{4-[(E)-2-(2,4-dihydroxyphenyl)ethenyl]-2,6-dihydroxyphenyl}-3-methylcyclohex-3-en-1-yl)-5-hydroxyphenoxy]-3,4,5-trihydroxyoxane-2-carboxylic acid	6-[2-(6-羧基-5-{4-[（E)-2-(2，4-二羟基苯基）乙烯基]-2，6-二羟基苯基}-3-甲基环己-3-烯-1-基)-5-羟基苯氧基]-3，4，5-三羟基恶烷-2-羧酸	Organic acids	有机酸	Organic acids	有机酸	C34H34O14	3	0.6757	-	3190.06	978.89	1094.84	570.96	509.47	116.41	1.04477	0.196125	0.327345	0.227372	-2.13687	down
MW0136420	6-{4-[3-(2,4-dihydroxyphenyl)-3-[2-(3,4-dihydroxyphenyl)-3,5,7-trihydroxy-3,4-dihydro-2H-1-benzopyran-8-yl]-2-hydroxypropyl]-2-hydroxyphenoxy}-3,4,5-trihydroxyoxane-2-carboxylic acid	6-{4-[3-(2,4-二羟苯基)-3-[2-(3,4-二羟苯基)-3,5,7-三羟基-3,4-二氢-2H-1-苯并吡喃-8-基]-2-羟丙基]-2-羟基苯氧基]-3,4,5-三羟基氧烷-2-羧酸	Organic acids	有机酸	Organic acids	有机酸	C36H36O17	3	0.6747	-	391000	369319	379569	157592	147793	176915	1.34411	6.27404e-05	0.00212651	0.423111	-1.24089	down
MW0000103	7-Ethyl-10-(4-amino-1-piperidino)carbonyloxycamptothecin	7-乙基-10-(4-氨基-1-哌啶基）羰氧基喜树碱	Alkaloids	生物碱	Quinoline alkaloids	喹啉类生物碱	C28H30N4O6	3	0.6737	-	3442.79	2568.69	4510.24	49041.2	44649.3	44169.3	1.34401	0.000410054	0.00538538	13.1024	3.71176	up
MW0132086	3,4,5-trihydroxy-6-{[3-hydroxy-4-({4-methoxy-7-oxo-7H-furo[3,2-g]chromen-9-yl}oxy)-2-methylbutan-2-yl]oxy}oxane-2-carboxylic acid	3，4，5-三羟基-6-{[3-羟基-4-({4-甲氧基-7-氧代-7H-呋喃并[3，2-g]苯并吡喃-9-基}氧基)-2-甲基丁-2-基]氧基}氧杂环己烷-2-羧酸	Organic acids	有机酸	Organic acids	有机酸	C23H26O13	3	0.6718	-	31847.3	33465.7	29299.5	2240.14	7342.93	20833.2	1.02819	0.0552034	0.129652	0.321483	-1.63719	down
MW0110707	2-Amino-2-methyl-1,3-propanediol	2-氨基-2-甲基-1，3-丙二醇；氨甲基丙二醇	Alcohol and amines	醇、胺类	Alcohols	醇类	C4H11NO2	3	0.6661	-	117538	116497	96391	254390	259308	271868	1.33878	0.00010148	0.00256747	2.37744	1.24941	up
MEDP0154	5,6-dihydrothymine	5,6-二氢胸腺嘧啶	Nucleotides and derivatives	核苷酸及其衍生物	Nucleotides and derivatives	核苷酸及其衍生物	C5H8N2O2	3	0.6648	-	1623	1501.44	2272.44	27492.5	14886	26924.5	1.33158	0.0348956	0.0936724	12.8413	3.68272	up
MW0112346	3,4,5-trihydroxy-6-({2,3,4-trihydroxy-2-[(4-hydroxyphenyl)methyl]-2,3-dihydro-1-benzofuran-6-yl}oxy)oxane-2-carboxylic acid	3，4，5-三羟基-6-({2，3，4-三羟基-2-[（4-羟基苯基）甲基]-2，3-二氢-1-苯并呋喃-6-基}氧基）氧烷-2-羧酸	Organic acids	有机酸	Organic acids	有机酸	C21H22O12	3	0.6646	-	121592	123655	134365	35962.3	33840.2	34970.7	1.35288	0.00150564	0.0110835	0.276001	-1.85726	down
MW0112353	3,4,5-trihydroxy-6-({2-hydroxy-3-[4-hydroxy-3-(3-methylbut-2-en-1-yl)phenyl]propanoyl}oxy)oxane-2-carboxylic acid	3，4，5-三羟基-6-({2-羟基-3-[4-羟基-3-(3-甲基-2-丁烯-1-基）苯基]丙酰基}氧基）氧烷-2-羧酸	Organic acids	有机酸	Organic acids	有机酸	C20H26O10	3	0.6646	-	832.86	293.65	720.05	3818.61	4610.04	5174.77	1.28864	0.00423993	0.021009	7.3669	2.88106	up
MW0106007	Benazeprilat	贝那普利拉	Benzene and substituted derivatives	苯及其衍生物	Benzene and substituted derivatives	苯及其衍生物	C22H24N2O5	3	0.6634	-	48612	62936	86987.9	7842.59	5859.81	10298.6	1.32271	0.033646	0.0911767	0.12089	-3.04823	down
MW0128713	[3,5-dihydroxy-2-(hydroxymethyl)-6-{2,4,6-trihydroxy-3-[3-(3-hydroxyphenyl)propanoyl]phenyl}oxan-4-yl]oxidanesulfonic acid	[3，5-二羟基-2-(羟甲基)-6-{2，4，6-三羟基-3-[3-(3-羟基苯基）丙酰基]苯基}恶烷-4-基]氧代磺酸	Organic acids	有机酸	Organic acids	有机酸	C21H24O13S	3	0.6616	-	66986.6	74021.2	72754.3	34379.2	31058.4	33797.5	1.34609	0.000709358	0.00735892	0.464231	-1.10708	down
MW0128678	[3-(4-methoxyphenyl)-3-oxo-1-phenylpropoxy]sulfonic acid	[3-(4-甲氧基苯基)-3-氧代-1-苯基丙氧基]磺酸	Organic acids	有机酸	Organic acids	有机酸	C16H16O6S	3	0.6612	-	6060.6	10262.9	6020.66	14141.5	28205	31828.1	1.19992	0.0768023	0.165483	3.31964	1.73103	up
MW0134526	5-hydroxy-4-(2-hydroxyphenyl)-8,8-dimethyl-6-(2-methylpropanoyl)-2H,8H-pyrano[2,3-f]chromen-2-one	5-羟基-4-(2-羟基苯基)-8，8-二甲基-6-(2-甲基丙酰基)-2H，8H-吡喃并[2，3-f]色烯-2-酮	Others	其它类	Ketone compounds	酮类化合物	C24H22O6	3	0.6587	-	1400.23	1400.23	1400.23	27890.3	28646.3	29362.3	1.35489	0.000243444	0.00404764	20.4488	4.35394	up
MW0169577	N-PHENYL-1-NAPHTHYLAMINE	N-苯基-1-萘胺	Benzene and substituted derivatives	苯及其衍生物	Benzene and substituted derivatives	苯及其衍生物	C16H13N	3	0.6566	-	38271.4	32446.9	23395.5	2382.83	13376.6	12378	1.05244	0.0182777	0.0588189	0.298973	-1.74191	down
FDATP01790	Ethenzamide	乙酰胺	Benzene and substituted derivatives	苯及其衍生物	Benzene and substituted derivatives	苯及其衍生物	C9H11NO2	3	0.6541	-	27707.4	25683.6	27686.9	76834.3	79094	87480.6	1.35005	0.0025822	0.0151918	3.00216	1.586	up
MW0135982	6-{[4-(6,11-dihydroxy-2,2,5-trimethyl-10-oxo-5,10-dihydro-2H-1-oxa-5-azatetraphen-12-yl)-6-hydroxy-2-(hydroxymethyl)-2,5-dimethyl-10-oxo-3,4,5,10-tetrahydro-2H-1-oxa-5-azatetraphen-11-yl]oxy}-3,4,5-trihydroxyoxane-2-carboxylic acid	6-{[4-(6,11-二羟基-2,2,5-三甲基-10-氧代-5,10-二氢-2H-1-氧杂-5-氮杂二苯甲基-12-基)-6-羟基- 2-(羟甲基)-2,5-二甲基-10-氧代-3,4,5,10-四氢-2H-1-氧杂-5-氮杂二苯菲-11-基]氧基} -3,4,5-三羟基氧烷-2-羧酸	Organic acids	有机酸	Organic acids	有机酸	C44H42N2O15	3	0.6537	-	34329	23492.8	29919.7	184314	179334	175679	1.34482	4.97182e-06	0.000949365	6.14678	2.61983	up
MW0135587	6-[4,5-dihydroxy-2-(3,5,6,7-tetrahydroxy-4-oxo-3,4-dihydro-2H-1-benzopyran-2-yl)phenoxy]-3,4,5-trihydroxyoxane-2-carboxylic acid	6-[4，5-二羟基-2-(3，5，6，7-四羟基-4-氧代-3，4-二氢-2H-1-苯并吡喃-2-基）苯氧基]-3，4，5-三羟基恶烷-2-羧酸	Organic acids	有机酸	Organic acids	有机酸	C21H20O15	3	0.6509	-	595.69	498.3	905.92	27696.8	12764.9	13053	1.3309	0.0733706	0.159761	26.7585	4.74192	up
MW0127643	({2,3-dihydroxy-5-[(2E)-3-(4-hydroxyphenyl)prop-2-enoyl]-4,6-dioxo-3-[3,4,5-trihydroxy-6-(hydroxymethyl)oxan-2-yl]cyclohex-1-en-1-yl}(3,4,5-trihydroxyoxan-2-yl)methoxy)sulfonic acid	（{2，3-二羟基-5-[（2E)-3-(4-羟基苯基）丙-2-烯酰基]-4，6-二氧代-3-[3，4，5-三羟基-6-(羟甲基）恶烷-2-基]环己-1-烯-1-基}（3，4，5-三羟基恶烷-2-基）甲氧基）磺酸	Organic acids	有机酸	Organic acids	有机酸	C27H32O19S	3	0.6482	-	12192.5	8859.84	15707.3	918.02	222.25	4493.02	1.10768	0.0161905	0.0541431	0.153247	-2.70607	down
MW0113659	6-{[3,5-dihydroxy-2-(1-hydroxy-3-methoxy-4-oxocyclohex-2-en-1-yl)-6-methoxy-4-oxo-4H-chromen-7-yl]oxy}-3,4,5-trihydroxyoxane-2-carboxylic acid	6-{[3，5-二羟基-2-(1-羟基-3-甲氧基-4-氧代环己-2-烯-1-基)-6-甲氧基-4-氧代-4H-苯并吡喃-7-基]氧}-3，4，5-三羟基恶烷-2-羧酸	Organic acids	有机酸	Organic acids	有机酸	C23H24O15	3	0.6474	-	2005.5	6483.06	1355.99	22742.4	13397.3	12216.9	1.17733	0.0427644	0.108641	4.91202	2.29632	up
MW0001509	1-Aminoanthracene	1-氨基蒽	Benzene and substituted derivatives	苯及其衍生物	Benzene and substituted derivatives	苯及其衍生物	C14H11N	3	0.6467	-	749.13	783.22	2040.31	14301.6	15671.9	15926.6	1.31575	3.53926e-05	0.00167509	12.8476	3.68343	up
MW0105092	3-Methyl-2-thioxoimidazolidin-4-one	3-甲基-2-硫代咪唑啉	Others	其它类	Ketone compounds	酮类化合物	C4H6N2OS	3	0.6435	-	5384.13	13377.9	6764.08	88586.5	78891.6	58591.8	1.30925	0.0121811	0.0442399	8.85641	3.14672	up
MW0135715	6-{[2-(2,4-dihydroxyphenyl)-3-[4-hydroxy-3-(4-methylpent-3-en-1-yl)but-2-en-1-yl]-4-oxo-4H-chromen-7-yl]oxy}-3,4,5-trihydroxyoxane-2-carboxylic acid	3，4，5-三羟基-6-{3-羟基-4-[7-羟基-3-(8-羟基-3，7-二甲基辛-2，6-二烯-1-基)-4-氧代-4H-苯并吡喃-2-基]苯氧基}恶烷-2-羧酸	Organic acids	有机酸	Organic acids	有机酸	C31H34O12	3	0.6431	-	25769.4	61304.1	62661.2	12597.1	12822.8	14195.4	1.22577	0.0930963	0.190017	0.26457	-1.91828	down
MW0131214	3-(3,7-dimethylocta-2,6-dien-1-yl)-5,7-dihydroxy-6-(3-methylbut-2-en-1-yl)-2-(2,4,5-trihydroxyphenyl)-4H-chromen-4-one	2-(2，4-二羟基苯基)-3-(3，7-二甲基辛-2，6-二烯-1-基)-5，7-二羟基-6-(3-甲基丁-2-烯-1-基)-3，4-二氢-2H-1-苯并吡喃-4-酮	Others	其它类	Others	其它	C30H34O7	3	0.6427	-	67602.9	63297.6	63062.9	30114.6	35680.2	17986.8	1.22545	0.0142371	0.0492055	0.431945	-1.21108	down
MW0115496	Zileuton O-glucuronide	齐留通O-葡糖苷酸	Heterocyclic compounds	杂环化合物	Heterocyclic compounds	杂环化合物	C17H20N2O8S	3	0.6405	-	1103.1	38.09	322.21	10171.5	10439.2	16562.2	1.20781	0.0270945	0.0780424	25.4018	4.66686	up
MW0130187	2-(3,4-dihydroxyphenyl)-8-[1-(2,4-dihydroxyphenyl)-3-(3,4-dihydroxyphenyl)-2-hydroxypropyl]-3,4-dihydro-2H-1-benzopyran-3,5,7-triol	2-(3,4-二羟苯基)-8-[1-(2,4-二羟苯基)-3-(3,4-二羟苯基)-2-羟丙基]-3,4-二氢-2H-1-苯并吡喃-3,5,7-三醇	Benzene and substituted derivatives	苯及其衍生物	Benzene and substituted derivatives	苯及其衍生物	C30H28O11	3	0.6388	-	1938.59	2629.89	1981.75	14657.3	15737.6	16235	1.34773	0.000170099	0.00334084	7.11882	2.83164	up
MW0128919	Sulfuric acid (2Z)-1-methyl-2,3-diphenyl-3-[4-[2-(dimethylamino)ethoxy]phenyl]-2-propenyl ester	{[（3Z)-4-{4-[2-(二甲氨基）乙氧基]苯基}-3,4-二苯基-3-烯-2-基]氧基}磺酸	Organic acids	有机酸	Organic acids	有机酸	C26H29NO5S	3	0.6388	-	28741.8	30790.2	27439.3	84677.6	94738.7	82536.9	1.34856	0.00256648	0.0151455	3.01195	1.5907	up
MW0132575	3,4-dihydroxy-1-methyl-4,5-diphenylpiperidine-2,6-dione	3，4-二羟基-1-甲基-4，5-二苯基哌啶-2，6-二酮	Others	其它类	Ketone compounds	酮类化合物	C18H17NO4	3	0.6375	-	1.07331e+06	1.07966e+06	1.00987e+06	168119	194548	17703.6	1.15569	0.00113225	0.00951711	0.120263	-3.05574	down
MW0134631	6-({12-[6,11-dihydroxy-2-(hydroxymethyl)-2,5-dimethyl-10-oxo-3,4,5,10-tetrahydro-2H-1-oxa-5-azatetraphen-4-yl]-6-hydroxy-2,2,5-trimethyl-10-oxo-5,10-dihydro-2H-1-oxa-5-azatetraphen-11-yl}oxy)-3,4,5-trihydroxyoxane-2-carboxylic acid	6-({12- [6,11-二羟基-2-(羟甲基)-2,5-二甲基-10-氧代-3,4,5,10-四氢-2H-1-氧杂-5-叠氮根-4 -yl] -6-hydroxy-2,2,5-trimethyl-10-oxo-5,10-dihydro-2H-1-oxa-5-azatetraphen-11-yl} oxy)-3,4,5-trihydroxyoxane -2-羧酸	Organic acids	有机酸	Organic acids	有机酸	C44H42N2O15	3	0.6368	-	44131.5	71348.7	39735.8	265465	246262	287514	1.32276	0.000193174	0.00354752	5.14922	2.36435	up
MW0122935	[(2R)-2-[(1R)-1,2-dihydroxyethyl]-3-hydroxy-5-oxo-2H-furan-4-yl] hydrogen sulfate	[(2R)-2-[(1R)-1,2-二羟乙基]-3-羟基-5-氧代-2H-呋喃-4-基]硫酸氢盐	Organic acids	有机酸	Organic acids	有机酸	C6H8O9S	3	0.6347	-	45.66	199.56	337.17	1406.8	2706.52	2410.83	1.2251	0.0324891	0.089037	11.2024	3.48573	up
MW0062293	1-tetradecanoyl-2-(9Z-tetradecenoyl)-glycero-3-phosphoserine	1-十四烷酰基-2-(9Z-十四碳烯酰基)-甘油-3-磷酸丝氨酸	GP	甘油磷脂类	PS	磷脂酰丝氨酸	C34H64NO10P	3	0.6345	-	244	133.58	129.55	610.12	562.06	500.55	1.27991	0.00154495	0.0111861	3.29842	1.72178	up
MW0153991	Musk xylene	二甲苯麝香	Benzene and substituted derivatives	苯及其衍生物	Benzene and substituted derivatives	苯及其衍生物	C12H15N3O6	3	0.634	-	249506	235871	90760.1	50033.7	44122.4	46965.8	1.21098	0.103765	0.205788	0.244945	-2.02947	down
MW0135835	6-{[2-(3,4-dihydroxyphenyl)-8-[2-(3,4-dihydroxyphenyl)-3,7-dihydroxy-3,4-dihydro-2H-1-benzopyran-4-yl]-3,5-dihydroxy-3,4-dihydro-2H-1-benzopyran-7-yl]oxy}-3,4,5-trihydroxyoxane-2-carboxylic acid	6-{2-(3,4-二羟苯基)-8-[2-(3,4-二羟苯基)-3,7-二羟基-3,4-二氢-2H-1-苯并吡喃-4-基]-3,5-二羟基-3,4-二氢-2H-1-苯并吡喃-7-基]氧]-3,4,5-三羟基-2-羧酸	Organic acids	有机酸	Organic acids	有机酸	C36H34O17	3	0.6313	-	290770	147730	174239	22823	24240	10269.2	1.30247	0.0506417	0.121664	0.0935671	-3.41785	down
MW0131706	3,4,5-trihydroxy-6-[(2-{7-oxo-2H,3H,7H-furo[3,2-g]chromen-2-yl}propan-2-yl)oxy]oxane-2-carboxylic acid	3，4，5-三羟基-6-[（2-{7-氧代-2H，3H，7H-呋喃并[3，2-g]苯并吡喃-2-基}丙-2-基）氧基]恶烷-2-羧酸	Organic acids	有机酸	Organic acids	有机酸	C20H22O10	3	0.6309	-	24883.6	24025.7	29865.5	15684.9	9636.72	2781.67	1.04191	0.028448	0.0810787	0.356755	-1.487	down
MW0128569	[2-(acetyloxy)-2-(9-{[(2E)-2-methylbut-2-enoyl]oxy}-2-oxo-2H,8H,9H-furo[2,3-h]chromen-8-yl)propoxy]sulfonic acid	[2-(乙酰氧基)-2-(9-{[（2E)-2-甲基丁-2-烯酰基]氧基}-2-氧代-2H，8H，9H-呋喃并[2，3-h]苯并吡喃-8-基）丙氧基]磺酸	Organic acids	有机酸	Organic acids	有机酸	C21H22O11S	3	0.6296	-	564841	590394	563795	274661	240388	150846	1.26976	0.00812373	0.0332781	0.387366	-1.36823	down
MW0103364	3'-Amino-3'-deoxythimidine glucuronide	3'-氨基-3'-脱氧胸苷葡糖苷酸	Nucleotides and derivatives	核苷酸及其衍生物	Nucleotides and derivatives	核苷酸及其衍生物	C16H23N3O10	3	0.6275	-	48254.3	41870.7	48477.7	18525	15710.1	25834.1	1.27509	0.0030532	0.0169504	0.433392	-1.20626	down
MW0112404	3,4,5-trihydroxy-6-[(1-oxo-3-phenylpropan-2-yl)oxy]oxane-2-carboxylic acid	3,4,5-三羟基-6-[（1-氧代-3-苯基丙烷-2-基）氧]氧烷-2-羧酸	Organic acids	有机酸	Organic acids	有机酸	C15H18O8	3	0.6185	-	1.1844e+06	1.1771e+06	1.24237e+06	517537	534423	511112	1.35311	0.000302758	0.00455609	0.433721	-1.20516	down
MW0011581	(R)-1-O-[b-D-Glucopyranosyl-(1->6)-b-D-glucopyranoside]-1,3-octanediol	(R)-1-O-[b-D-Glucopyranosyl-(1->6)-b-D-glucopyranoside]-1,3-octanediol	Others	其它类	Saccharides	糖类	C20H38O12	3	0.6168	-	360.04	924.41	626.59	82.73	38.27	185.91	1.19024	0.0729341	0.159153	0.160598	-2.63847	down
MW0118630	2-Hydroxy-imipramine glucuronide	2-羟基丙咪嗪葡糖苷酸	Heterocyclic compounds	杂环化合物	Heterocyclic compounds	杂环化合物	C25H32N2O7	3	0.6158	-	1741.22	403.16	545.24	4949.07	14277.3	14255.5	1.243	0.078035	0.166905	12.4485	3.63791	up
MW0135085	6-(5-{8-[5,7-dihydroxy-2-(4-hydroxyphenyl)-4-oxo-3,4-dihydro-2H-1-benzopyran-3-yl]-5,7-dihydroxy-4-oxo-3,4-dihydro-2H-1-benzopyran-2-yl}-2-hydroxyphenoxy)-3,4,5-trihydroxyoxane-2-carboxylic acid	6-(5-{8-[5，7-二羟基-2-(4-羟基苯基)-4-氧代-3，4-二氢-2H-1-苯并吡喃-3-基]-5，7-二羟基-4-氧代-3，4-二氢-2H-1-苯并吡喃-2-基}-2-羟基苯氧基)-3，4，5-三羟基恶烷-2-羧酸	Organic acids	有机酸	Organic acids	有机酸	C36H30O17	3	0.611	-	32812.3	40127	38432.5	317.64	11632.6	82.74	1.08997	0.00385413	0.0195595	0.108044	-3.21031	down
MW0132444	3,4,5-trihydroxy-6-{3-hydroxy-4-[5-hydroxy-3-(3-hydroxy-3-methylbutyl)-8,8-dimethyl-4-oxo-4H,8H-pyrano[2,3-f]chromen-2-yl]phenoxy}oxane-2-carboxylic acid	3，4，5-三羟基-6-{3-羟基-4-[5-羟基-3-(3-羟基-3-甲基丁基)-8，8-二甲基-4-氧代-4H，8H-吡喃并[2，3-f]苯并吡喃-2-基]苯氧基}恶烷-2-羧酸	Organic acids	有机酸	Organic acids	有机酸	C31H34O13	3	0.6078	-	19486	24932.6	24578.2	154422	170476	171982	1.34985	0.000649166	0.00697559	7.20151	2.8483	up
MW0136427	6-{4-[3-(3,4-dihydroxyphenyl)-2-oxopropanoyl]-2,3,5-trihydroxyphenoxy}-3,4,5-trihydroxyoxane-2-carboxylic acid	6-{4-[3-(3，4-二羟基苯基)-2-氧代丙酰基]-2，3，5-三羟基苯氧基}-3，4，5-三羟基恶烷-2-羧酸	Organic acids	有机酸	Organic acids	有机酸	C21H20O14	3	0.5995	-	48149.1	39037.4	39152.7	19502.4	17222.6	20372.7	1.32451	0.011037	0.0412928	0.451939	-1.1458	down
MEDL02687	Feruloylcholine	阿魏酰胆碱	Alkaloids	生物碱	Phenolamine	酚胺	C15H22NO4+	3	0.5987	-	6046.79	4763.24	4674.04	487.01	746.98	195.91	1.29018	0.00445755	0.0216655	0.0923465	-3.4368	down
MW0106383	4-(Isopropylamino)-2-(2-pyridyl)-2-phenylbutyramide	去异丙基二吡胺	Alcohol and amines	醇、胺类	Amines	胺类	C18H23N3O	3	0.5985	-	6988.74	5854.59	6772.42	15816.4	28799.1	34513.5	1.27505	0.0691607	0.153034	4.03395	2.01219	up
MW0130509	(2-Hydroxybenzyl)succinic acid	2-[（2-羟基苯基）甲基]丁二酸	Organic acids	有机酸	Organic acids	有机酸	C11H12O5	3	0.5973	-	116727	123751	112660	32530.9	37194.9	33440.2	1.35061	0.00029809	0.00452745	0.29214	-1.77527	down
MW0106089	Cabbage identification factor 2	Cabbage identification factor 2	Organic acids	有机酸	Organic acids	有机酸	C15H12N4O3S	3	0.5941	-	5279.29	6029.51	3068.3	1032.85	964.39	1660.22	1.26063	0.0494413	0.119887	0.254395	-1.97486	down
MEDP1515	Carnitine C9:0(2,6-Dimethylheptanoyl carnitine)	肉碱 C9	FA	脂肪酰类	CAR	酰基肉碱	C16H31NO4	3	0.5929	-	6782.58	4475.96	13309.4	95056.8	83662.4	85067.5	1.31178	0.000103438	0.00257834	10.737	3.42452	up
MW0112365	3,4,5-trihydroxy-6-({7-oxo-7H-furo[3,2-g]chromen-4-yl}oxy)oxane-2-carboxylic acid	3，4，5-三羟基-6-({7-氧代-7H-呋喃并[3，2-g]苯并吡喃-4-基}氧基）氧烷-2-羧酸	Organic acids	有机酸	Organic acids	有机酸	C17H14O10	3	0.5925	-	2589.71	113.27	67.88	14689.9	15858.6	15399.1	1.17943	0.00104126	0.00907998	16.5824	4.05158	up
MEDL01981	4',5-Dihydroxy-3',5'-dimethoxyflavone	4',5-二羟基-3',5'-二甲氧基黄酮	Flavonoids	黄酮	Flavones	黄酮	C17H14O6	3	0.592	-	27448.2	27081.8	23504.1	56291.1	61425.4	57270.9	1.34197	0.000121414	0.00278408	2.24245	1.16508	up
MW0061096	PG(16:0/18:3(6Z,9Z,12Z))	PG(16:0/18:3(6Z,9Z,12Z))	GP	甘油磷脂类	PG	磷脂酰甘油	C40H73O10P	3	0.5872	-	131967	162598	113561	34383.3	44045.4	41008.2	1.32637	0.0182161	0.0586832	0.292647	-1.77277	down
MW0156239	Pyricarbate	焦碳酸	Others	其它类	Lactones	内酯类化合物	C11H15N3O4	3	0.5828	-	6431.82	2853.95	3389.22	10677	14143	6927.82	1.11683	0.0728464	0.159078	2.50476	1.32467	up
MW0134049	5,7-dihydroxy-2-(3-hydroxyphenyl)-3,6-dimethoxy-3,4-dihydro-2H-1-benzopyran-4-one	5，7-二羟基-2-(3-羟基苯基)-3，6-二甲氧基-3，4-二氢-2H-1-苯并吡喃-4-酮	Benzene and substituted derivatives	苯及其衍生物	Benzene and substituted derivatives	苯及其衍生物	C17H16O7	3	0.5827	-	20987	21399.3	21993.7	4861.14	4484.73	7539.18	1.31841	0.00188688	0.0125425	0.262271	-1.93087	down
MW0136132	6-{2-[(E)-2-(3,5-dihydroxyphenyl)ethenyl]-5-{[3,4,5-trihydroxy-6-(hydroxymethyl)oxan-2-yl]oxy}phenoxy}-3,4,5-trihydroxyoxane-2-carboxylic acid	6-{2-[（E)-2-(3，5-二羟基苯基）乙烯基]-5-{[3，4，5-三羟基-6-(羟甲基）恶烷-2-基]氧}苯氧基}-3，4，5-三羟基恶烷-2-羧酸	Organic acids	有机酸	Organic acids	有机酸	C26H30O15	3	0.582	-	19736.6	21922.3	17686.4	77153.7	88966	89765	1.34714	0.00202938	0.0130108	4.31179	2.10829	up
MW0107527	Imazethapyr	咪草烟	Organic acids	有机酸	Organic acids	有机酸	C15H19N3O3	3	0.5786	-	376.63	210.82	110.28	450.85	446.55	1053.88	1.02871	0.163501	0.287743	2.79661	1.48368	up
MW0000459	Tetrahydroharmine	四氢哈尔明	Alkaloids	生物碱	Alkaloids	生物碱	C13H16N2O	3	0.5774	-	38421.8	44491.1	45678.6	9429.14	8195.21	5356.65	1.32748	0.000737993	0.0074605	0.178713	-2.48428	down
MW0116694	1,4'-Bipiperidine-1'-carboxylic acid	1，4'-联哌啶-1'-羧酸；[1，4'-联哌啶]-1'-羧酸	Organic acids	有机酸	Organic acids	有机酸	C11H20N2O2	3	0.5737	-	2883.93	7626.65	6413.59	10917.8	13156.1	11785.5	1.09258	0.0310727	0.0864277	2.11883	1.08327	up
MW0104226	18-Carboxy-dinor-LTE4	18-Carboxy-dinor-LTE4	Organic acids	有机酸	Organic acids	有机酸	C21H31NO7S	3	0.5722	-	7558.94	2315.66	8582.41	16827.5	13230.2	17855.6	1.0668	0.0179544	0.0581864	2.59594	1.37626	up
MW0055935	1,2-di-(11Z-eicosenoyl)-sn-glycero-3-phosphate	PA(20:1(11Z)/20:1(11Z))	GP	甘油磷脂类	PA	磷脂酸	C43H81O8P	3	0.5712	-	8.16564e+06	1.51608e+07	2.57328e+07	3.94232e+06	3.52479e+06	7.5134e+06	1.10213	0.14941	0.268467	0.305355	-1.71144	down
MW0130909	2-Phenyl-1-(2,3,4-trihydroxyphenyl)propan-1-one	2-苯基-1-(2，3，4-三羟基苯基）丙-1-酮	Others	其它类	Ketone compounds	酮类化合物	C15H14O4	3	0.5681	-	3.53491e+06	3.42661e+06	5.5067e+06	6.31613e+06	1.31874e+07	7.52045e+06	1.09858	0.139163	0.255276	2.16743	1.11599	up
MW0138087	1-[5,7-dihydroxy-3-(3,4,5-trihydroxybenzoyl)oxy-3,4-dihydro-2H-chromen-2-yl]-3,4,6-trihydroxy-5-oxobenzo[7]annulene-8-carboxylic acid	1-[5,7-dihydroxy-3-(3,4,5-trihydroxybenzoyl)oxy-3,4-dihydro-2H-chromen-2-yl]-3,4,6-trihydroxy-5-oxobenzo[7]annulene-8-carboxylic acid	Organic acids	有机酸	Organic acids	有机酸	C28H20O14	3	0.5665	-	1115.9	511.89	357.75	2484.58	1469.71	3069.68	1.16093	0.0503387	0.121204	3.53756	1.82276	up
MW0135563	6-[4-(5,7-dihydroxy-6-{4-hydroxy-6-methyl-5-oxo-3-[(3,4,5-trihydroxy-6-methyloxan-2-yl)oxy]oxan-2-yl}-4-oxo-4H-chromen-2-yl)-2-hydroxyphenoxy]-3,4,5-trihydroxyoxane-2-carboxylic acid	6-[4-(5，7-二羟基-6-{4-羟基-6-甲基-5-氧代-3-[（3，4，5-三羟基-6-甲基氧烷-2-基）氧基]氧烷-2-基}-4-氧代-4H-苯并吡喃-2-基)-2-羟基苯氧基]-3，4，5-三羟基氧烷2-羧酸	Organic acids	有机酸	Organic acids	有机酸	C33H36O20	3	0.5638	-	103576	61689.8	108284	6216.84	467.63	21108.1	1.09397	0.0191684	0.0608169	0.1016	-3.29903	down
MW0112359	3,4,5-trihydroxy-6-({3-oxo-3-[(3,4,5,6-tetrahydroxyoxan-2-yl)methoxy]propanoyl}oxy)oxane-2-carboxylic acid	3,4,5-三羟基-6-({3-氧代-3-[（3,4,5,6-四羟基氧烷-2-基）甲氧基]丙酰基}氧基）氧烷-2-羧酸	Organic acids	有机酸	Organic acids	有机酸	C15H22O15	3	0.5634	-	71.65	38.19	159.21	1581.24	2087.33	2696.03	1.30925	0.0230889	0.0698143	23.6558	4.56412	up
MW0141744	(2S)-2-amino-3-[[3-hexadecanoyloxy-2-[(Z)-octadec-9-enoyl]oxypropoxy]-hydroxyphosphoryl]oxypropanoic acid	1-十六酰基-2-(9Z-十八酰基)-sn-甘油-3-磷酸丝氨酸	GP	甘油磷脂类	PS	磷脂酰丝氨酸	C40H76NO10P	3	0.5519	-	394703	378776	1.15081e+06	152762	42402.8	33276.8	1.19437	0.153901	0.274488	0.118714	-3.07443	down
MW0117865	6,7-Dinitro-1,4-dihydroquinoxaline-2,3-dione	6,7-二硝基-1,4-二氢喹喔啉-2,3-二酮	Others	其它类	Ketone compounds	酮类化合物	C8H4N4O6	3	0.5501	-	280127	166642	229160	91354.8	65578.4	159490	1.08676	0.0513386	0.122839	0.468131	-1.09502	down
MW0114285	Dimethyl 2-galloylgalactarate	2-没食子酰半乳酸二甲酯	Others	其它类	Lactones	内酯类化合物	C15H18O12	3	0.5467	-	17846.9	36252.2	7370.23	4459.11	1858.21	7296.8	1.03863	0.19605	0.327303	0.221478	-2.17476	down
MW0134501	5-Hydroxy-2-(4-methoxyphenyl)-8-(3-methylbut-2-enyl)-3,7-bis[[3,4,5-trihydroxy-6-(hydroxymethyl)oxan-2-yl]oxy]chromen-4-one	5-羟基-2-(4-甲氧基苯基)-8-(3-甲基-2-烯-1-基)-3,7-双（{[3,4,5-三羟基-6-(羟甲基）氧代-2-基]氧基]-4H-铬-4-酮	Others	其它类	Ketone compounds	酮类化合物	C33H40O16	3	0.5455	-	36265.9	38773.2	26119	144038	127094	120128	1.3297	0.00108835	0.00929745	3.86781	1.95152	up
MW0001612	1-Hydroxy-6-methoxypyrene	1-羟基-6-甲氧基芘	Benzene and substituted derivatives	苯及其衍生物	Benzene and substituted derivatives	苯及其衍生物	C17H12O2	3	0.5432	-	6315.11	1036	1198.45	16304.7	20266	4452.1	1.02797	0.138693	0.254557	4.79823	2.2625	up
MW0128656	[3-(3-Hydroxy-4-oxochromen-2-yl)phenyl] hydrogen sulate	[3-(3-羟基-4-氧代-4H-苯并吡喃-2-基）苯基]氧代磺酸	Organic acids	有机酸	Organic acids	有机酸	C15H10O7S	3	0.543	-	6141.23	4135.15	6451.85	72416.6	69652.4	40755.4	1.32967	0.0312963	0.0867251	10.9291	3.4501	up
MW0131816	3,4,5-trihydroxy-6-[2-hydroxy-2-(9-{[(2E)-2-methylbut-2-enoyl]oxy}-2-oxo-2H,8H,9H-furo[2,3-h]chromen-8-yl)propoxy]oxane-2-carboxylic acid	3，4，5-三羟基-6-[2-羟基-2-(9-{[（2E)-2-甲基丁-2-烯酰基]氧基}-2-氧代-2H，8H，9H-呋喃并[2，3-h]苯并吡喃-8-基）丙氧基]恶烷-2-羧酸	Organic acids	有机酸	Organic acids	有机酸	C25H28O13	3	0.5422	-	26475.5	27778.3	22946.8	7770.99	5530.98	4889.55	1.32737	0.00086525	0.00814037	0.235639	-2.08535	down
MW0103968	Formylcarbamic acid	（羟甲基亚乙基）氨基甲酸	Organic acids	有机酸	Organic acids	有机酸	C2H3NO3	3	0.5418	-	2785.9	2511.86	2697.75	649.32	715.58	683.87	1.35246	0.00100219	0.00887935	0.25624	-1.96443	down
MW0012723	19,20-DiHDPA	19,20-二羟基-4Z，7Z，10Z，13Z，16Z-二十二碳五烯酸	Lipids	脂质	Free fatty acids	游离脂肪酸	C22H34O4	3	0.5397	-	3619.77	1924.16	2488.62	7012.35	6129.82	9146.39	1.24932	0.0171911	0.0565047	2.77478	1.47237	up
MW0127683	({6-[(E)-2-methoxyethenyl]-2-oxo-2H-chromen-7-yl}methoxy)sulfonic acid	（{6-[（E)-2-甲氧基乙烯基]-2-氧代-2H-铬-7-基}甲氧基）磺酸	Organic acids	有机酸	Organic acids	有机酸	C13H12O7S	3	0.5394	-	404.12	42.43	134.47	3234.63	3590.28	3166.74	1.25586	6.59993e-05	0.00212651	17.1967	4.10406	up
MW0104534	2-amino-4-({1-[(carboxymethyl)-C-hydroxycarbonimidoyl]-2-[(1-hydroxy-2-methyl-3-oxo-1-phenylbutan-2-yl)sulfanyl]ethyl}-C-hydroxycarbonimidoyl)butanoic acid	2-氨基-4-({1-[（羧甲基)-C-羟基亚氨基甲酰基]-2-[（1-羟基-2-甲基-3-氧代-1-苯基丁-2-基）硫烷基]乙基}-C-羟基亚氨基甲酰基）丁酸	Organic acids	有机酸	Organic acids	有机酸	C21H29N3O8S	3	0.5341	-	18333	30496.8	42560.9	102551	95193.4	116263	1.26234	0.00144197	0.0108807	3.43587	1.78067	up
MW0061112	PG(16:1(9Z)/18:3(6Z,9Z,12Z))	PG(16:1(9Z)/18:3(6Z,9Z,12Z))	GP	甘油磷脂类	PG	磷脂酰甘油	C40H71O10P	3	0.5318	-	743737	1.67917e+06	884964	128839	201485	163714	1.29705	0.0835871	0.17546	0.149352	-2.74321	down
MEDN1861	N-Myristoylglycine	N-肉豆蔻酰甘氨酸	Amino acids and derivatives	氨基酸及其衍生物	Amino acids and derivatives	氨基酸及其衍生物	C16H31NO3	3	0.5311	-	5728.59	1202.19	7298.4	1215.31	346.06	422.5	1.09494	0.152271	0.272163	0.139423	-2.84246	down
MW0010618	Lyoniresinol 9'-sulfate	Lyoniresinol 9'-硫酸盐	Lignans and Coumarins	木脂素和香豆素	Lignans	木脂素	C22H28O11S	3	0.5309	-	63746.8	81721.3	70738	30221.4	20767.8	31260.5	1.29569	0.00360771	0.0187031	0.380423	-1.39432	down
MW0104471	20-COOH-leukotriene E4	20-COOH-白三烯 E4	Organic acids	有机酸	Organic acids	有机酸	C23H35NO7S	3	0.526	-	564.04	915.09	1519.98	22297.8	20534.2	18090.5	1.33144	0.00271556	0.0156506	20.3135	4.34437	up
MW0011288	(3S,7E,9S)-9-Hydroxy-4,7-megastigmadien-3-one 9-glucoside	(3S,7E,9S)-9-Hydroxy-4,7-megastigmadien-3-one 9-glucoside	Others	其它类	Ketone compounds	酮类化合物	C19H30O7	3	0.5228	-	34754.4	27612.2	31857.4	12415.5	21760.5	6765.76	1.09289	0.0379657	0.0997233	0.434515	-1.20252	down
MW0000357	N-Methyl-14-O-demethylepiporphyroxine	N-甲基-14-O-去甲基表卟啉	Alkaloids	生物碱	Alkaloids	生物碱	C20H21NO6	3	0.5214	-	46095.9	47533.9	47094.2	4296.57	10445.8	11956.6	1.27213	0.00295658	0.016541	0.189726	-2.39801	down
MW0052823	6-Pohpa	6-Pohpa	Lipids	脂质	Free fatty acids	游离脂肪酸	C32H60O4	3	0.5113	-	236.2	391.04	147.17	1055.3	2435.32	13045.3	1.1578	0.299755	0.439055	21.353	4.41636	up
MW0061091	1-hexadecanoyl-2-(9Z-hexadecenoyl)-glycero-3-phospho-(1'-sn-glycerol)	PG(16:0/16:1(9Z))	GP	甘油磷脂类	PG	磷脂酰甘油	C38H73O10P	3	0.5022	-	82605	43625.2	72716.9	22699.4	3826.77	5799.65	1.18819	0.0245414	0.0727182	0.162484	-2.62163	down
MW0145997	Asn-Tyr	L-天冬酰胺酰-L-酪氨酸	Amino acids and derivatives	氨基酸及其衍生物	Amino acids and derivatives	氨基酸及其衍生物	C13H17N3O5	3	0.5004	-	5795.03	1535.81	6204.29	36748.1	29580.6	33227.4	1.24694	0.000590626	0.00653003	7.35538	2.8788	up
MADP0527	O-phosphate-L-tyrosine	O-磷酸基-L-酪氨酸	Amino acids and derivatives	氨基酸及其衍生物	Amino acids and derivatives	氨基酸及其衍生物	C9H12NO6P	3	0.522	21820-51-9	13578.8	22814.3	19983.4	79924.9	75541	71058.4	1.322	0.000113769	0.00271512	4.01806	2.0065	up
MW0139371	Pinosylvin	银松素	Others	其它类	Stilbene	茋类	C14H12O2	2	0.9398	22139-77-1 | 102-61-4	65865.1	68519.9	70277	158615	151470	153246	1.35277	2.69149e-05	0.00157634	2.26388	1.1788	up
MW0124445	Irisxanthone	鸢尾口山酮	Flavonoids	黄酮	Other Flavonoids	其它类黄酮	C20H20O11	2	0.9	51419-56-8	1096.51	886.92	704.73	249.92	438.97	240.48	1.24543	0.018113	0.0585423	0.345727	-1.53229	down
MW0114048	Catalposide	梓苷	Terpenoids	萜类	Monoterpenoids	倍萜	C22H26O12	2	0.8948	6736-85-2	85262.9	80277.2	90443.8	37748	24151.9	36572.1	1.29661	0.00105686	0.00916082	0.38468	-1.37827	down
MW0057740	1,2-Dihexanoyl-sn-glycero-3-phosphocholine	PC(6:0/6:0)	GP	甘油磷脂类	PC	磷脂酰胆碱	C20H40NO8P	2	0.8844	34506-67-7	64315.5	55280.4	59594.9	25338.4	29735	25217.3	1.33513	0.00124787	0.0100153	0.448074	-1.15819	down
MW0009992	Triphenylphosphine oxide	三苯基氧化膦	Benzene and substituted derivatives	苯及其衍生物	Benzene and substituted derivatives	苯及其衍生物	C18H15OP	2	0.8805	791-28-6	41099	22784.8	29618.8	78221.9	79319.1	63327.4	1.24893	0.00464929	0.0221659	2.36216	1.24011	up
MW0000181	Chelidonine	白屈菜碱	Alkaloids	生物碱	Isoquinoline alkaloids	异喹啉类生物碱	C20H19NO5	2	0.8788	476-32-4	11022.1	9250.47	7050.82	27542	33422.1	23536.6	1.30108	0.0125597	0.045181	3.09261	1.62882	up
MW0120699	4-(Hydroxymethyl)pyrimidine	嘧啶-4-基甲醇	Heterocyclic compounds	杂环化合物	Heterocyclic compounds	杂环化合物	C5H6N2O	2	0.8712	33581-98-5	12638.7	16051.6	14170.5	75924.9	75658.5	110427	1.33815	0.0233991	0.0702947	6.11306	2.6119	up
MW0105581	Alitame	爱丽甜	Organic acids	有机酸	Organic acids	有机酸	C14H25N3O4S	2	0.8687	80863-62-3	19905.5	18385.2	25987.2	51043.2	60460.3	60564.6	1.31769	0.00115981	0.00958395	2.67694	1.42058	up
MW0126471	8-Demethyl-8-(dimethylamino)riboflavin	玫瑰黄素	Heterocyclic compounds	杂环化合物	Heterocyclic compounds	杂环化合物	C18H23N5O6	2	0.8592	51093-55-1	13553.9	22317.7	21114.5	52947.5	64941.7	53935.2	1.2967	0.00190951	0.0126028	3.0152	1.59225	up
MW0150465	Gly-Pro-Gly	甘氨酸-脯氨酸-甘氨酸	Amino acids and derivatives	氨基酸及其衍生物	Amino acids and derivatives	氨基酸及其衍生物	C9H15N3O4	2	0.8489	2441-63-6	37587.4	39397.2	36347	14085.5	14735.5	13973.3	1.35259	0.000731084	0.00744949	0.377602	-1.40506	down
MW0108880	N-omega-Propyl-L-arginine	N-ω-丙基-L-精氨酸	Amino acids and derivatives	氨基酸及其衍生物	Amino acids and derivatives	氨基酸及其衍生物	C9H20N4O2	2	0.8438	137361-05-8	1891.59	1861.26	1349.25	30131.6	30515.4	32510.8	1.35089	0.000339795	0.00476079	18.2587	4.19051	up
MW0005061	4-Hydroxy-3-methoxyphenylacetone	4-羟基-3-甲氧基苯丙酮	Phenolic acids	酚酸类	Phenolic acids	酚酸类	C10H12O3	2	0.8272	2503-46-0	155948	147360	158145	333770	363594	369486	1.34934	0.00152059	0.0111196	2.31193	1.2091	up
MW0114927	Metamfepramone	安非他酮	Benzene and substituted derivatives	苯及其衍生物	Benzene and substituted derivatives	苯及其衍生物	C11H15NO	2	0.8258	15351-09-4	123955	121834	126940	5605.2	5468.8	6193.21	1.35451	0.000114384	0.00271512	0.0463265	-4.43202	down
MW0012936	1-Oleoyl-2-acetyl-sn-glycerol	1-油酰基-2-乙酰基-sn-甘油	GL	甘油脂类	DG	甘油二酯	C23H42O5	2	0.8215	86390-77-4 | 92282-11-6	17879.4	23952.4	20858.7	71683.2	73621.6	74035.3	1.34291	0.000239086	0.00401628	3.49878	1.80685	up
MW0001243	Urea, tetraphenyl-	1,1,3,3-四苯基脲	Benzene and substituted derivatives	苯及其衍生物	Benzene and substituted derivatives	苯及其衍生物	C25H20N2O	2	0.8006	632-89-3	67037.1	19265.6	46594.8	239524	214091	194171	1.23957	0.000855166	0.00808057	4.87433	2.2852	up
MW0055475	(2-Hydroxy-2-oxo-1,2lambda5-oxaphospholan-5-yl)methyl (Z)-octadec-9-enoate	油酰基3-碳环磷酸	Lipids	脂质	Free fatty acids	游离脂肪酸	C22H41O5P	2	0.7963	779333-58-3	87404.1	65175.2	69679.5	158627	177605	180583	1.32033	0.000528135	0.00619749	2.32528	1.21741	up
MW0109322	Prolyl-leucyl-glycine	Pro Leu Gly	Amino acids and derivatives	氨基酸及其衍生物	Amino acids and derivatives	氨基酸及其衍生物	C13H23N3O4	2	0.7878	33676-42-5	3295.49	1883.2	2236.34	8687.94	10314	10418.2	1.31413	0.000681713	0.0072435	3.96763	1.98828	up
MW0107237	s-Hexylglutathione	S-己基-L-谷胱甘肽	Amino acids and derivatives	氨基酸及其衍生物	Amino acids and derivatives	氨基酸及其衍生物	C16H29N3O6S	2	0.7866	24425-56-7	89338.8	85485.5	83754.9	180188	342347	203971	1.2592	0.0908011	0.18634	2.80961	1.49037	up
MW0052336	Diethyl fumarate	富马酸二乙酯	Others	其它类	Lactones	内酯类化合物	C8H12O4	2	0.7835	623-91-6 | 26298-06-6	17190.3	21695.3	17165.3	5062.44	3043.85	2701.3	1.31527	0.00328774	0.017739	0.192817	-2.3747	down
MW0137994	Dimethylfraxetin	白蜡树素；6,7,8-三甲氧基香豆素	Lignans and Coumarins	木脂素和香豆素	Coumarins	香豆素	C12H12O5	2	0.7817	6035-49-0	106927	111246	108129	210964	227363	220826	1.35166	0.000978723	0.00884623	2.02007	1.0144	up
MW0123812	Ellipticine	玫瑰树碱	Alkaloids	生物碱	Plumerane	吲哚类生物碱	C17H14N2	2	0.7806	519-23-3	6253.65	10778.5	10046.9	70204.1	74021.4	77436.4	1.33754	4.07553e-05	0.00175464	8.18574	3.03311	up
MW0004284	4-(3-Hydroxybutyl)phenol	4-(4-羟基苯基)-2-丁醇；4-HPB；杜鹃醇；桦木酚	Phenolic acids	酚酸类	Phenolic acids	酚酸类	C10H14O2	2	0.7794	69617-84-1	44984.8	38752.5	46512.2	134067	151007	149966	1.3464	0.000760272	0.00758056	3.34005	1.73987	up
MW0113988	beta-D-Galp-(1->3)-D-GalpNAc	β-D-半乳糖基-(1->3)-N-乙酰基-D-半乳糖胺；β-D-吡喃半乳糖基-(1->3)-N-乙酰基-D-半乳糖胺	Others	其它类	Saccharides	糖类	C14H25NO11	2	0.7794	20972-29-6	7270.72	5175.64	8182.7	9968.94	20210.2	14413	1.1322	0.104344	0.206812	2.16162	1.11211	up
MW0169534	N-benzyl-1-methyl-1H-pyrazolo[3,4-d]pyrimidin-4-amine	N-苄基-1-甲基-1H-吡唑并[3,4-d]嘧啶-4-胺	Benzene and substituted derivatives	苯及其衍生物	Benzene and substituted derivatives	苯及其衍生物	C13H13N5	2	0.7769	105903-56-8	23304.4	15241.1	16149.5	85508.5	37691.7	35720.6	1.14885	0.1635	0.287743	2.90558	1.53883	up
MW0063689	Strictosidine	异胡豆苷	Alkaloids	生物碱	Alkaloids	生物碱	C27H34N2O9	2	0.7748	20824-29-7	581354	564008	605408	241891	223392	200515	1.34532	2.85277e-05	0.00164123	0.380289	-1.39483	down
MW0109433	Pro-Ser	L-脯氨酰-L-丝氨酸	Amino acids and derivatives	氨基酸及其衍生物	Amino acids and derivatives	氨基酸及其衍生物	C8H14N2O4	2	0.7724	71835-80-8	19815	19820.9	20531.1	2704.48	6378.57	4159.88	1.29215	0.00328343	0.017739	0.220103	-2.18375	down
MW0139693	Senecionine	千里光碱	Others	其它类	Lactones	内酯类化合物	C18H25NO5	2	0.7717	130-01-8	9602.49	10129.5	8233.6	17936.8	61106.9	61486.6	1.18195	0.121633	0.230737	5.02512	2.32916	up
MW0001692	N-Phenyl-N'-(2-pyridinyl)urea	1-苯基-3-(吡啶-2-基）脲	Benzene and substituted derivatives	苯及其衍生物	Benzene and substituted derivatives	苯及其衍生物	C12H11N3O	2	0.7697	2327-17-5	19441.4	21964.9	17176.1	44501.6	50014.6	40163.1	1.32104	0.00464043	0.0221659	2.29897	1.20099	up
MW0006306	Benzyl butyl phthalate	邻苯二甲酸丁苄酯	Benzene and substituted derivatives	苯及其衍生物	Benzene and substituted derivatives	苯及其衍生物	C19H20O4	2	0.7695	85-68-7	25519.4	29490.5	26227.6	60690.1	52968.9	53993.2	1.33593	0.0018984	0.0125607	2.06373	1.04525	up
MW0138292	Glycitin	黄豆黄苷	Flavonoids	黄酮	Isoflavones	异黄酮	C22H22O10	2	0.7666	40246-10-4	117298	117417	141276	39403.4	41350.7	23275.7	1.29917	0.0011941	0.00980154	0.276682	-1.8537	down
MW0168432	1,2-bis(heptanoylthio) Glycerophosphocholine	1,2-双(庚酰硫基)甘油磷酸胆碱	GP	甘油磷脂类	PC	磷脂酰胆碱	C22H44NO6PS2	2	0.7664	89019-63-6	36784.1	33076.4	45957.6	84461.4	115426	66074	1.23014	0.0652076	0.146785	2.29637	1.19936	up
MW0115996	(6R)-5-Methyltetrahydrofolic acid	(6R)-5-甲基四氢叶酸	Organic acids	有机酸	Organic acids	有机酸	C20H25N7O6	2	0.7657	31690-09-2	26445.6	27122.8	25023.1	72397.1	75696.3	84222.9	1.34901	0.00378231	0.0193005	2.956	1.56365	up
MW0109883	Threonyl-lysyl-glutamic acid	Thr Lys Glu	Amino acids and derivatives	氨基酸及其衍生物	Amino acids and derivatives	氨基酸及其衍生物	C15H28N4O7	2	0.764	122605-96-3	6707.39	6251.37	5203.16	24813.5	33277.2	36837.8	1.33557	0.0176322	0.0574282	5.22679	2.38593	up
MW0000125	Ambelline	安贝灵	Alkaloids	生物碱	Alkaloids	生物碱	C18H21NO5	2	0.7636	3660-62-6	259398	254771	253575	93844.1	96264	99109.4	1.35413	3.69409e-07	0.000266836	0.376711	-1.40847	down
MW0105376	7-Aminodesacetoxycephalosporanic acid	7-氨基乙酰氧基头孢菌酸	Organic acids	有机酸	Organic acids	有机酸	C8H10N2O3S	2	0.7634	22252-43-3 | 70287-30-8	25.83	380.7	91.45	25103.9	26672	28629.8	1.30618	0.00131401	0.0102879	161.464	7.33507	up
MW0054852	Acetylacrylic Acid Methyl Ester	4-氧-2-戊烯酸甲酯	FA	脂肪酰类	Others	其它	C6H8O3	2	0.7618	2833-24-1	4666.59	8965.03	17185.8	1349	2651.81	2039.6	1.18417	0.152124	0.272141	0.196007	-2.35103	down
MW0150813	His-Ala-Glu	组氨酸-丙氨酸-谷氨酸	Amino acids and derivatives	氨基酸及其衍生物	Amino acids and derivatives	氨基酸及其衍生物	C14H21N5O6	2	0.7615	64111-99-5	521244	441871	454930	966662	1.03859e+06	1.15244e+06	1.33336	0.00306683	0.016997	2.22679	1.15496	up
MW0150509	Gly-Trp-Trp	甘氨酸-色氨酸-色氨酸	Amino acids and derivatives	氨基酸及其衍生物	Amino acids and derivatives	氨基酸及其衍生物	C24H25N5O4	2	0.7609	57850-28-9	25009.1	18621	21402	65609.5	76169.9	77617.6	1.33685	0.00138113	0.0106131	3.37367	1.75432	up
MW0107062	Glycylglycyl-L-histidine	甘氨酰-L-组氨酸	Amino acids and derivatives	氨基酸及其衍生物	Amino acids and derivatives	氨基酸及其衍生物	C10H15N5O4	2	0.7607	7451-76-5 | 93404-95-6	21467.4	24700.9	13921.2	2234.93	6167.87	2744.72	1.25636	0.0244128	0.0724692	0.185515	-2.43039	down
MW0001365	1,4-Dibenzylpiperazine	1,4-二苄基哌嗪	Benzene and substituted derivatives	苯及其衍生物	Benzene and substituted derivatives	苯及其衍生物	C18H22N2	2	0.7606	1034-11-3	176096	148414	166071	56177.7	48567	53955.7	1.34581	0.00318514	0.0174005	0.323494	-1.62819	down
MEDP2132	1-Aminocyclobutanecarboxylic acid	1-氨基环戊烷羧酸	Amino acids and derivatives	氨基酸及其衍生物	Amino acids and derivatives	氨基酸及其衍生物	C5H9NO2	2	0.7595	22264-50-2 | 22264-16-0 | 117259-24-2	75398.6	65337.9	69471.4	155291	169124	175109	1.34418	0.000768392	0.00760322	2.37633	1.24874	up
MADN0578	3-(Pyrimidin-2-yl)propanoic acid	3-嘧啶-2-基-丙酸	Heterocyclic compounds	杂环化合物	Heterocyclic compounds	杂环化合物	C7H8N2O2	2	0.756	439108-20-0	3287.11	3566.99	2540.42	290.28	1752.7	724.07	1.09793	0.0175742	0.0572968	0.294539	-1.76347	down
MW0137880	Decursin	紫花前胡素	Lignans and Coumarins	木脂素和香豆素	Coumarins	香豆素	C19H20O5	2	0.7556	5928-25-6	12045.2	12858.7	16302	118224	99756.5	109169	1.34823	0.00196576	0.0128198	7.93938	2.98903	up
MW0168654	7(S),17(S)-dihydroxy-8(E),10(Z),13(Z),15(E),19(Z)-Docosapentaenoic Acid	7(S),17(S)-二羟基-8(E),10(Z),13(Z),15(E),19(Z)-二十二碳五烯酸	FA	脂肪酰类	Others	其它	C22H34O4	2	0.7555	887752-13-8	2032.39	21813.1	23636.7	202851	232659	226747	1.20081	9.35504e-05	0.00248671	13.9475	3.80193	up
MW0133704	4'-Methoxyflavanone	4′-甲氧基黄烷酮	Flavonoids	黄酮	Flavones	黄酮	C16H14O3	2	0.7552	3034-08-0 | 97005-76-0	3490.93	3548.79	2606.96	8043.48	8550.08	8071.9	1.3245	0.000631055	0.00684889	2.55689	1.35439	up
MW0157910	Thr-Ser-Lys	苏氨酸-丝氨酸-赖氨酸	Amino acids and derivatives	氨基酸及其衍生物	Amino acids and derivatives	氨基酸及其衍生物	C13H26N4O6	2	0.7547	71730-64-8	73167.2	197408	71043.6	34131.2	35427	36645.8	1.13961	0.201047	0.332911	0.310885	-1.68555	down
MW0110228	Tyrosyl-tyrosyl-phenylalanine	Tyr Tyr Phe	Amino acids and derivatives	氨基酸及其衍生物	Amino acids and derivatives	氨基酸及其衍生物	C27H29N3O6	2	0.7533	108322-11-8	3910.6	3097.09	2798.24	53959	57748.6	58943.2	1.35142	0.000469839	0.00578168	17.4028	4.12125	up
MW0117084	4-Cyanoindole	4-氰基吲哚	Alkaloids	生物碱	Plumerane	吲哚类生物碱	C9H6N2	2	0.75	16136-52-0	90707	103771	100875	45401.4	53790.9	28914	1.24087	0.006209	0.0271122	0.43374	-1.2051	down
MW0001284	1,2-Dibenzoylbenzene	1,2-二苯甲酰苯	Benzene and substituted derivatives	苯及其衍生物	Benzene and substituted derivatives	苯及其衍生物	C20H14O2	2	0.7496	1159-86-0	21635.6	21849.3	26282.9	65786.2	62570.1	68817	1.34328	6.87485e-05	0.00214872	2.82613	1.49883	up
MW0141895	2-Pyrimidinemethanol	2-嘧啶甲醇	Heterocyclic compounds	杂环化合物	Heterocyclic compounds	杂环化合物	C5H6N2O	2	0.7476	42839-09-8	31335.2	41094.7	26078	216334	208628	225022	1.34177	9.55148e-06	0.00116551	6.5983	2.72209	up
MW0000153	Bicuculline	比扣扣灵碱	Alkaloids	生物碱	Isoquinoline alkaloids	异喹啉类生物碱	C20H17NO6	2	0.7476	485-49-4	34243.8	44469.3	43825.2	107049	94391.6	98957.8	1.32759	0.000301925	0.00455409	2.45146	1.29364	up
MW0149960	Glu-Cys-Glu	谷氨酸-半胱氨酸-谷氨酸	Amino acids and derivatives	氨基酸及其衍生物	Amino acids and derivatives	氨基酸及其衍生物	C13H21N3O8S	2	0.7466	153147-66-1	12141.5	9076.29	10315.3	154528	155817	157581	1.35226	3.32638e-08	0.000108124	14.8392	3.89134	up
MW0105215	4-hydroxy Nonenal Mercapturic Acid	4-羟基壬巯基酸	Organic acids	有机酸	Organic acids	有机酸	C14H25NO5S	2	0.7447	146764-24-1	185881	301213	436151	600212	633038	664104	1.1424	0.039172	0.102201	2.05509	1.0392	up
MW0122604	8-Deoxylactucin	8-去氧山莴苣素	Terpenoids	萜类	Sesquiterpenoids	倍半萜	C15H16O4	2	0.7444	65725-10-2	22784.6	9372.22	27067	9441.79	5540.69	5251.28	1.08697	0.127489	0.239056	0.341649	-1.54941	down
MW0123638	Diethyl pyridine-2,4-dicarboxylate	2,4-DPD	Others	其它类	Lactones	内酯类化合物	C11H13NO4	2	0.7431	41438-38-4	15642.9	6292.01	14756.5	27594.8	28884.5	31685.7	1.149	0.0176929	0.0574982	2.40288	1.26476	up
MW0153885	Methionylvaline	甲硫氨酰缬氨酸	Amino acids and derivatives	氨基酸及其衍生物	Amino acids and derivatives	氨基酸及其衍生物	C10H20N2O3S	2	0.743	14486-13-6	434772	431177	418737	1.21591e+06	1.28886e+06	1.33689e+06	1.35293	0.00142846	0.010836	2.99035	1.58031	up
MW0107733	Leu-Leu-Ala	亮亮氨酸	Amino acids and derivatives	氨基酸及其衍生物	Amino acids and derivatives	氨基酸及其衍生物	C15H29N3O4	2	0.7427	20274-80-0	27958.7	24703.4	34804.7	6201.01	11242.5	14074	1.21388	0.00904582	0.0359236	0.360337	-1.47258	down
MW0153221	Lys-Gln-Ala-Gly-Asp-Val	Lys-Gln-Ala-Gly-Asp-Val	Amino acids and derivatives	氨基酸及其衍生物	Amino acids and derivatives	氨基酸及其衍生物	C25H44N8O10	2	0.7415	80755-87-9	33590.6	30048	31546.6	8399.29	5653.87	10947	1.30365	0.000472212	0.00579217	0.262647	-1.9288	down
MW0157031	Ser-Tyr	L-丝氨酰-L-酪氨酸	Amino acids and derivatives	氨基酸及其衍生物	Amino acids and derivatives	氨基酸及其衍生物	C12H16N2O5	2	0.7411	21435-27-8	35166.6	26027.5	42073.5	23166.2	8340.47	18930	1.02137	0.0515747	0.123313	0.488407	-1.03384	down
MW0107887	N-linoleoylglycine	亚油酰甘氨酸	Amino acids and derivatives	氨基酸及其衍生物	Amino acids and derivatives	氨基酸及其衍生物	C20H35NO3	2	0.7407	2764-03-6	5913.57	2687.7	6410.06	9729.66	12826.1	11519.5	1.13354	0.0143286	0.0494953	2.26997	1.18267	up
MW0138842	Luvangetin	luvangetin	Lignans and Coumarins	木脂素和香豆素	Coumarins	香豆素	C15H14O4	2	0.7393	483-92-1	187431	295868	150257	584421	648128	441439	1.23096	0.0125128	0.0450418	2.64221	1.40175	up
MW0137256	Acacetin diacetate	醋乙双酯	Flavonoids	黄酮	Flavones	黄酮	C20H16O7	2	0.7386	5892-39-7	190006	185528	190269	56405.2	55673.9	57985.5	1.35458	1.06429e-05	0.00116551	0.300572	-1.73422	down
MW0109401	L-Prolyl-L-methionine	L-脯氨酰-L-蛋氨酸	Amino acids and derivatives	氨基酸及其衍生物	Amino acids and derivatives	氨基酸及其衍生物	C10H18N2O3S	2	0.7371	52899-08-8	48146.6	58528.1	60153.2	169742	193832	197210	1.34216	0.00129089	0.0102093	3.36145	1.74908	up
MW0105949	Aspartylglutamate	天冬氨酰谷氨酸	Amino acids and derivatives	氨基酸及其衍生物	Amino acids and derivatives	氨基酸及其衍生物	C9H14N2O7	2	0.7367	6157-06-8	36645.2	25417.4	51414.9	14187.1	15526.5	10768.4	1.2301	0.0791084	0.168562	0.35674	-1.48705	down
MW0111615	1-(3,4-Dimethoxyphenyl)propan-1-one	1-(3,4-二甲氧基苯基)丙-1-酮	Others	其它类	Ketone compounds	酮类化合物	C11H14O3	2	0.7316	1835-04-7	19437.9	12223.1	15192.3	8773.03	5879.52	2649.61	1.11537	0.0239652	0.0714035	0.369283	-1.4372	down
MW0123481	Erythorbic acid	异抗坏血酸	Others	其它类	Vitamin	维生素	C6H8O6	2	0.7302	89-65-6	199145	196332	196310	86761.6	90741	89982.8	1.35404	5.33784e-07	0.000347013	0.451996	-1.14562	down
MW0107651	L-Allysine ethylene acetal	L-赖氨酸乙烯缩醛	Amino acids and derivatives	氨基酸及其衍生物	Amino acids and derivatives	氨基酸及其衍生物	C8H15NO4	2	0.7272	215054-80-1	43854.6	42560	40427.1	219.38	1912.85	2768.95	1.2454	1.07762e-05	0.00116551	0.0386402	-4.69376	down
MW0108765	Neotame	纽甜	Benzene and substituted derivatives	苯及其衍生物	Benzene and substituted derivatives	苯及其衍生物	C20H30N2O5	2	0.7265	165450-17-9	53418.2	49088.1	35649.7	17434.1	11162.2	35638.6	1.043	0.0588081	0.135764	0.464944	-1.10487	down
MW0138164	Fisetinidol	Fisetinidol	Flavonoids	黄酮	Flavanonols	二氢黄酮醇	C15H14O5	2	0.7245	490-49-3	47170.4	23489.2	22283	72354.4	74479.6	73869.6	1.20069	0.0336644	0.0911885	2.37463	1.2477	up
MW0107090	Glycyl-L-prolyl-L-lysine	甘氨酰-L-脯氨酰-L-赖氨酸	Amino acids and derivatives	氨基酸及其衍生物	Amino acids and derivatives	氨基酸及其衍生物	C13H24N4O4	2	0.7244	52766-29-7	6599.15	3120.6	10017.7	22931.5	19123	25187.4	1.19774	0.0041947	0.0208325	3.40681	1.76842	up
MW0115168	Primin	普里明	Others	其它类	Ketone compounds	酮类化合物	C12H16O3	2	0.7207	15121-94-5	62.78	1508.63	250.79	12295.2	2246.98	13920.5	1.12273	0.133411	0.247378	15.6199	3.96532	up
MW0106829	Gln-Val	谷酰氨-缬氨酸	Amino acids and derivatives	氨基酸及其衍生物	Amino acids and derivatives	氨基酸及其衍生物	C10H19N3O4	2	0.7193	31189-73-8	24034.9	14870.8	20300.7	54245.4	52187.1	48061.5	1.29864	0.00107689	0.00923596	2.60941	1.38373	up
MW0107078	Glycyl-leucyl-tyrosine	Gly Leu Tyr	Amino acids and derivatives	氨基酸及其衍生物	Amino acids and derivatives	氨基酸及其衍生物	C17H25N3O5	2	0.7185	4306-24-5	97270.6	45528.7	82275.4	150360	152138	159344	1.16055	0.0325124	0.089037	2.05195	1.037	up
MW0114021	Buphedrone	丁苯丙酮	Others	其它类	Ketone compounds	酮类化合物	C11H15NO	2	0.7168	408332-79-6	113579	107850	107614	420264	452025	458981	1.35348	0.000981643	0.00884623	4.04588	2.01645	up
MW0169766	Resorcinol sulfoxide	间苯二酚亚砜	Benzene and substituted derivatives	苯及其衍生物	Benzene and substituted derivatives	苯及其衍生物	C12H10O5S	2	0.7164	62845-75-4	13263.3	21111.3	15314.7	5729.22	2659.46	12540.2	1.00566	0.0655648	0.14736	0.421195	-1.24744	down
MW0108019	Lys-Pro-Val	L-赖氨酸-L-脯氨酸-L-缬氨酸	Amino acids and derivatives	氨基酸及其衍生物	Amino acids and derivatives	氨基酸及其衍生物	C16H30N4O4	2	0.7163	67727-97-3	11164.9	10916.3	8552.66	3711.56	1906.6	2179.93	1.29286	0.0027023	0.0156018	0.254558	-1.97393	down
MW0140682	Coclaurine	乌药碱	Alkaloids	生物碱	Isoquinoline alkaloids	异喹啉类生物碱	C17H19NO3	2	0.714	486-39-5	19009.7	5240.48	15007.7	53045.2	51770.2	60291	1.20745	0.00193637	0.0127155	4.20568	2.07234	up
MW0049133	Cymarin	磁麻苷	Steroids	甾体	Cardiac glycoside	强心苷	C30H44O9	2	0.7106	508-77-0	108800	106589	125214	49788.3	56099	53389.8	1.3375	0.00553986	0.0250973	0.467632	-1.09656	down
MW0156482	(4S)-3-Isobutyryl-4-benzyloxazolidine-2-one	S-4-苄基-3-异丁酰恶唑烷-2-	Benzene and substituted derivatives	苯及其衍生物	Benzene and substituted derivatives	苯及其衍生物	C14H17NO3	2	0.7061	652157-27-2	29860.4	14660.1	28392.4	52339.7	46636.7	49204.2	1.15497	0.0254278	0.0747859	2.0323	1.02311	up
MW0118839	6,7-Dimethoxy-2-(piperazin-1-yl)quinazolin-4-amine	4-氨基-6,7-二甲氧基-2-(1-哌嗪基）喹唑啉	Heterocyclic compounds	杂环化合物	Heterocyclic compounds	杂环化合物	C14H19N5O2	2	0.7041	60547-97-9	10728.4	13355.6	11810.1	7136.85	6505.85	2645.99	1.08983	0.0250132	0.0737464	0.453798	-1.13988	down
MW0006328	N-Benzyloxycarbonylglycine	N-苄氧基羰基甘氨酸	Benzene and substituted derivatives	苯及其衍生物	Benzene and substituted derivatives	苯及其衍生物	C10H11NO4	2	0.7032	1138-80-3	41585.2	45435.9	42892.4	91943.3	116752	69300.3	1.25214	0.0682099	0.151716	2.13985	1.09751	up
MW0157897	Thr-Met	苏氨酸-甲硫氨酸	Amino acids and derivatives	氨基酸及其衍生物	Amino acids and derivatives	氨基酸及其衍生物	C9H18N2O4S	2	0.7025	90729-28-5	479517	477959	430477	119142	115759	119048	1.35304	0.00208524	0.0131998	0.255015	-1.97134	down
MW0015922	Artemisin	Artemisin	Others	其它类	Lactones	内酯类化合物	C15H18O4	2	0.7019	481-05-0	17124.3	6525.61	13920.1	97386.4	107467	82682.4	1.30197	0.00266485	0.0154515	7.65334	2.93609	up
MW0014629	6-[(3Z,6Z,9Z)-1-hydroxypentadeca-3,6,9-trienyl]oxan-2-one	5,6-DHET内酯	Organic acids	有机酸	Organic acids	有机酸	C20H32O3	2	0.7003	213126-92-2	431015	431265	427918	992302	974573	1.01398e+06	1.35441	0.000367263	0.00500956	2.31039	1.20813	up
MW0115745	Cannabichromene	大麻色原烯	Others	其它类	Others	其它	C21H30O2	2	0.7001	20675-51-8 | 18793-28-7	78023.8	78017.5	80717.2	29290.5	36809.9	51526.6	1.23439	0.0242121	0.0719721	0.496823	-1.0092	down
Zmgn000503	2,3-Dihydroxy-3-methylbutanoic acid	2,3-二羟基-3-甲基丁酸	Organic acids	有机酸	Organic acids	有机酸	C5H10O4	3	0.9943	1756-18-9	241614	237462	221365	43187.3	40999.2	35839.2	1.35168	0.000310139	0.00457192	0.171357	-2.54492	down
FDATN01519	D-phenylalanine	D-苯丙氨酸	Amino acids and derivatives	氨基酸及其衍生物	Amino acids and derivatives	氨基酸及其衍生物	C9H11NO2	3	0.9828	673-06-3	2.44784e+06	2.35477e+06	2.2541e+06	5.75302e+06	5.87488e+06	5.81994e+06	1.35292	5.0041e-06	0.000949365	2.47252	1.30598	up
MW0146512	Bacopasaponin C	狗头皂苷C	Terpenoids	萜类	Triterpene Saponin	三萜皂苷	C46H74O17	3	0.9626	178064-13-6	44457.2	54657.5	53958.1	10798.8	8979.46	18224.2	1.29432	0.000999312	0.00887935	0.248264	-2.01005	down
MW0001670	1-Nitro-3-(4-nitrophenoxy)benzene	1-硝基-3-(4-硝基苯氧基)苯	Benzene and substituted derivatives	苯及其衍生物	Benzene and substituted derivatives	苯及其衍生物	C12H8N2O5	3	0.9593	2914-72-9	1091.7	1091.7	1091.7	15695.5	20591.6	21500	1.35178	0.00969835	0.03789	17.6444	4.14114	up
MW0151273	Hygromycin A	潮霉素A	Organic acids	有机酸	Organic acids	有机酸	C23H29NO12	3	0.9545	6379-56-2	48272.6	45306.7	49029.3	18120.9	21164.9	21879.6	1.34031	7.40801e-05	0.00223998	0.428904	-1.22127	down
MW0002730	2-Aminobenzenecarbothioamide	2-氨基苯硫代酰胺	Benzene and substituted derivatives	苯及其衍生物	Benzene and substituted derivatives	苯及其衍生物	C7H8N2S	3	0.9513	2454-39-9	555964	546403	516522	177320	188332	186495	1.353	0.00050595	0.00601313	0.341065	-1.55188	down
MW0116636	1,3-Benzothiazol-5-amine	1,3-苯并噻唑-5-胺	Benzene and substituted derivatives	苯及其衍生物	Benzene and substituted derivatives	苯及其衍生物	C7H6N2S	3	0.9507	1123-93-9	11161.9	10534.1	5689.76	3872.37	2375.96	6119.83	1.0361	0.0822988	0.17354	0.451628	-1.14679	down
MW0001807	2-Thiophen-2-yl-2,3-dihydro-1H-perimidine	2-Thiophen-2-yl-2,3-dihydro-1H-perimidine	Benzene and substituted derivatives	苯及其衍生物	Benzene and substituted derivatives	苯及其衍生物	C15H12N2S	3	0.9479	6584-40-3 | 5664-78-8	95280.2	21157.6	57714.9	10642.2	4852.38	4325.68	1.21056	0.136852	0.251891	0.11381	-3.1353	down
MW0009775	Sudan I	苏丹一	Benzene and substituted derivatives	苯及其衍生物	Benzene and substituted derivatives	苯及其衍生物	C16H12N2O	3	0.9433	842-07-9 | 40339-35-3 | 71351-99-0	95199.1	92418.2	88074.3	187189	238713	226057	1.33353	0.013707	0.0478823	2.36481	1.24173	up
MW0160090	Einecs	Einecs	Organic acids	有机酸	Organic acids	有机酸	C14H23NO12	3	0.9427	97747-46-1	36812.1	51473.9	28165.1	8343.37	13600.5	8383.78	1.27681	0.0444403	0.111246	0.260432	-1.94102	down
MW0103298	(R)-N-(1-Methyl-2-phenylethyl)adenosine	(R)-N-(1-甲基-2-苯乙基)腺苷	Nucleotides and derivatives	核苷酸及其衍生物	Nucleotides and derivatives	核苷酸及其衍生物	C19H23N5O4	3	0.9415	38594-96-6 | 29-36-7	7468.66	11955.4	9642.37	72490.1	68846	57009.1	1.33817	0.00425682	0.0210606	6.82385	2.77059	up
MW0008432	4-methyl-N-(naphthalen-1-yl)thiazol-2-amine	4-甲基-N-(萘-1-基)噻唑-2-胺	Benzene and substituted derivatives	苯及其衍生物	Benzene and substituted derivatives	苯及其衍生物	C14H12N2S	3	0.9347	1957-01-3	2658.38	301.58	462.85	16306.4	11353.6	19810.1	1.23647	0.0193582	0.0611802	13.8687	3.79377	up
MW0143066	N-Debenzoyltaxol	N-去苯甲酰紫杉醇	Benzene and substituted derivatives	苯及其衍生物	Benzene and substituted derivatives	苯及其衍生物	C40H47NO13	3	0.93	133524-70-6	278473	285898	283264	140263	139405	143092	1.35426	1.19254e-05	0.00116551	0.498753	-1.0036	down
MW0122725	SecinH3	SecinH3	Alcohol and amines	醇、胺类	Amines	胺类	C24H20N4O4S	3	0.926	853625-60-2	553803	424757	426924	184675	193994	201746	1.32677	0.0220208	0.0672732	0.412965	-1.27591	down
MW0118903	3-[(Aminocarbonyl)amino]-5-[4-(4-morpholinylmethyl)phenyl]-2-thiophenecarboxamide	3-[(氨基羰基)氨基]-5-[4-(4-吗啉基甲基)苯基]-2-噻吩甲酰胺	Alcohol and amines	醇、胺类	Amines	胺类	C17H20N4O3S	3	0.9203	494772-86-0	55627.7	50049.4	67717.5	18398.1	6752.72	18969.2	1.22167	0.00350631	0.0183787	0.254448	-1.97455	down
ZINC73280937	Regelidine	黑蔓定碱	Alkaloids	生物碱	Alkaloids	生物碱	C35H37NO8	3	0.9202	114542-54-0	2319.42	2262.2	13420.4	65904.1	71577	74981.1	1.25131	0.00026349	0.0042295	11.8021	3.56098	up
MEDP1310	4-Hydroxy-l-tryptophan	4-羟基-L-色氨酸	Amino acids and derivatives	氨基酸及其衍生物	Amino acids and derivatives	氨基酸及其衍生物	C11H12N2O3	3	0.9177	25242-90-4	12036.3	1650.95	5071.82	26704.2	28414.7	30054.8	1.14198	0.0123445	0.0445867	4.5404	2.18282	up
MW0009205	tert-butyl N-[2-[3-iodo-4-[4-tri(propan-2-yl)silyloxyphenoxy]phenyl]ethyl]carbamate	N-[2-[3-碘-4-[4-三(丙-2-基)甲硅烷氧基苯氧基]苯基]乙基]氨基甲酸叔丁酯	Benzene and substituted derivatives	苯及其衍生物	Benzene and substituted derivatives	苯及其衍生物	C28H42INO4Si	3	0.9171	788824-53-3	16614	19018	25916.8	149568	174212	178299	1.34289	0.00186132	0.0124747	8.15742	3.02811	up
MW0009860	9,10-Anthracenedione, 1,8-dihydroxy-4-nitro-5-(phenylamino)-	9,10-蒽二酮, 1,8-dihydroxy-4-nitro-5-(phenylamino)-	Benzene and substituted derivatives	苯及其衍生物	Benzene and substituted derivatives	苯及其衍生物	C20H12N2O6	3	0.9164	20241-76-3	8295.82	2850.4	7942.28	20395.8	16672	11957.1	1.08579	0.034016	0.0920259	2.5683	1.36081	up
MW0007454	1R,cis-RU 15525	1R,顺式-RU 15525	Benzene and substituted derivatives	苯及其衍生物	Benzene and substituted derivatives	苯及其衍生物	C23H24O4S	3	0.913	58769-20-3	160095	228665	192589	87807	53859.3	99067.5	1.22576	0.0122267	0.0443118	0.414095	-1.27197	down
MW0154497	Nifuradene	硝呋喃	Others	其它类	Ketone compounds	酮类化合物	C8H8N4O4	3	0.9117	555-84-0	175494	173125	216347	57514.7	81839.5	82275.1	1.29983	0.00464062	0.0221659	0.392288	-1.35001	down
MW0127552	Pyriftalid	Pyriftalid	Others	其它类	Others	其它	C15H14N2O4S	3	0.9108	135186-78-6	1587.78	376.91	2691.84	5168.02	8462.57	5535.43	1.09581	0.0236079	0.0707911	4.11594	2.04122	up
MW0157291	Sulfazecin	磺胺嘧啶	Amino acids and derivatives	氨基酸及其衍生物	Amino acids and derivatives	氨基酸及其衍生物	C12H20N4O9S	3	0.8943	77912-79-9	81.57	156.62	854.09	4107.34	4096.84	3748.07	1.21935	0.00114457	0.00951711	10.9425	3.45187	up
MW0010239	Colchicine	秋水仙碱	Alkaloids	生物碱	Alkaloids	生物碱	C22H25NO6	3	0.8874	64-86-8 | 30512-31-3	27844.8	28524.2	28398.4	49841	89534.8	52185.4	1.22001	0.109425	0.214333	2.25985	1.17622	up
MW0052353	Digoxigenin	异羟基洋地黄毒苷元	Steroids	甾体	Cardiac glycoside	强心苷	C23H34O5	3	0.887	1672-46-4	69875	81175.6	88734.6	208799	215050	213925	1.34146	0.000593884	0.00654502	2.65978	1.41131	up
MW0012303	9-Dihydro-13-acetylbaccatin III	13-乙酰基-9-二氢浆果赤霉素	Terpenoids	萜类	Ditepenoids	二萜	C33H42O12	3	0.875	142203-65-4	12270.4	11698.3	12485.8	36919.2	37209	42860	1.3495	0.00465106	0.0221659	3.20916	1.68219	up
MW0000390	Oxymatrine	氧化苦参碱	Alkaloids	生物碱	Quinorisidine alkaloids	奎诺里西啶类生物碱	C15H24N2O2	3	0.863	16837-52-8 | 54809-74-4	2758.84	5433.74	2624.63	1317.42	1741.97	2242.24	1.04366	0.174731	0.301866	0.490111	-1.02882	down
MW0008809	N-Acetyltyramine	N-乙酰乙胺	Phenolic acids	酚酸类	Phenolic acids	酚酸类	C10H13NO2	3	0.8536	1202-66-0	28607.3	26494.8	28458.5	8986.94	8081.67	9104.03	1.35095	0.00018727	0.00348499	0.313218	-1.67476	down
MW0157097	CAFFEINE and SODIUM BENZOATE	咖啡因和苯甲酸钠	Benzene and substituted derivatives	苯及其衍生物	Benzene and substituted derivatives	苯及其衍生物	C15H15N4NaO4	3	0.8395	8000-95-1	22169.2	17735	24769.2	5307.52	14127.4	10655.7	1.0906	0.0266704	0.0774383	0.465271	-1.10386	down
MW0123211	Carapanaubine	卡拉帕诺宾	Heterocyclic compounds	杂环化合物	Heterocyclic compounds	杂环化合物	C23H28N2O6	3	0.8039	1255-02-3	12653	7652.92	27574.3	34784.4	33647.1	31194.7	1.02808	0.0979737	0.196825	2.08074	1.0571	up
MEDP1127	1-Acetylindole	1-乙酰吲哚	Alkaloids	生物碱	Plumerane	吲哚类生物碱	C10H9NO	3	0.798	576-15-8	7383.93	5975.36	3553.37	25416.8	14607	22767	1.25131	0.0315647	0.0873097	3.71265	1.89245	up
MEDP1962	IAA-L-Ala	N-(3-吲哚乙酰基)-L-丙氨酸	Amino acids and derivatives	氨基酸及其衍生物	Amino acids and derivatives	氨基酸及其衍生物	C13H14N2O3	3	0.7969	57105-39-2	4334.7	16196.8	14236.8	36327.5	41799.1	39987	1.1543	0.00819428	0.0335249	3.39716	1.76433	up
MW0117525	N-(3-Hydroxypropyl)phthalimide	N-(3-羟丙基）邻苯二甲酰亚胺	Alkaloids	生物碱	Plumerane	吲哚类生物碱	C11H11NO3	3	0.7927	883-44-3	37043.4	35269.3	31258.5	16212.7	8020.32	19430.1	1.16632	0.0139861	0.0485731	0.421576	-1.24614	down
MW0107880	L-Homophenylalanine	L-高苯丙氨酸	Amino acids and derivatives	氨基酸及其衍生物	Amino acids and derivatives	氨基酸及其衍生物	C10H13NO2	3	0.7882	943-73-7	87953.7	82483	82932.4	25179.1	29883.2	21441.8	1.33737	8.15899e-05	0.0023069	0.301948	-1.72763	down
MW0111931	Gallacetophenone	没食子苯乙酮	Phenolic acids	酚酸类	Phenolic acids	酚酸类	C8H8O4	3	0.7881	528-21-2	1.2394e+06	1.21345e+06	1.16943e+06	215349	225757	230906	1.35429	0.000240034	0.00402181	0.185522	-2.43034	down
MW0142086	2,5-Dihydroxypyridine	2,5-二羟基吡啶	Alkaloids	生物碱	Pyridine alkaloids	吡啶类生物碱	C5H5NO2	3	0.7819	5154-01-8 | 84719-33-5 | 24154-26-5	30840.4	27918.2	28396.5	71226.4	79149	79707.8	1.34842	0.00147719	0.0110016	2.63993	1.4005	up
MEDP1675	Leu-Leu-Gly	L-亮氨酸-L-亮氨酸-L-甘氨酸	Amino acids and derivatives	氨基酸及其衍生物	Amino acids and derivatives	氨基酸及其衍生物	C14H27N3O4	3	0.7807	4464-36-2	30342.2	29917.2	20322.4	59578.5	53730.9	71682.7	1.26993	0.00842743	0.0342417	2.2957	1.19894	up
MW0141142	1,3,6,8-Tetrahydroxynaphthalene	1,3,6,8-萘基萘; 1,3,6,8-四羟基萘	Benzene and substituted derivatives	苯及其衍生物	Benzene and substituted derivatives	苯及其衍生物	C10H8O4	3	0.7801	18512-30-6	34377.9	30542.5	34719.9	14825.1	14966	15222.6	1.34751	0.00509482	0.0236244	0.451762	-1.14637	down
MEDP2063	2-Hydroxyethyl salicylate	乙二醇水杨酸酯	Benzene and substituted derivatives	苯及其衍生物	Benzene and substituted derivatives	苯及其衍生物	C9H10O4	3	0.775	87-28-5	47743.9	53881	44155.4	23700	14945	23607.6	1.26829	0.00237329	0.0143657	0.42703	-1.22759	down
MW0148475	Digitogenin	洋地黄苷元	Heterocyclic compounds	杂环化合物	Heterocyclic compounds	杂环化合物	C27H44O5	3	0.7713	511-34-2	18843.3	18015.9	17433.7	73217.6	80694	87262.9	1.35118	0.00391394	0.0198169	4.44211	2.15124	up
MW0109537	S-(1,2-Dicarboxyethyl)glutathione	S-(1,2-二羧甲基）谷胱甘肽	Amino acids and derivatives	氨基酸及其衍生物	Amino acids and derivatives	氨基酸及其衍生物	C14H21N3O10S	3	0.7693	1115-52-2	66014.8	30465.7	57096.2	285286	260996	286974	1.30632	0.000109791	0.00268327	5.42567	2.4398	up
MEDP1780	Leu-phe	L-亮氨酸-L-苯丙氨酸	Amino acids and derivatives	氨基酸及其衍生物	Amino acids and derivatives	氨基酸及其衍生物	C15H22N2O3	3	0.7639	3063-05-6	69522	82885	89227.4	262880	245596	245955	1.34285	3.04621e-05	0.00164607	3.1222	1.64256	up
MW0000171	Catharanthine	长春质碱	Alkaloids	生物碱	Plumerane	吲哚类生物碱	C21H24N2O2	3	0.7615	2468-21-5	35608.4	33704.9	24661.4	267743	293129	284769	1.3473	0.000132778	0.00290516	8.9986	3.1697	up
MW0157198	Stachyose hydrate	水苏糖四水合物	Others	其它类	Saccharides	糖类	C24H50O25	3	0.756	10094-58-3 | 54261-98-2 | 470-55-3	1173.29	807.96	384.09	2695.42	4631.33	1346.43	1.07867	0.151939	0.271885	3.66678	1.87451	up
MW0159545	beta-D-Glucopyranosiduronic acid,5-[3-[(2,2,3,3-tetramethylcyclopropyl)carbonyl]-1H-indol-1-yl]pentyl	beta-D-Glucopyranosiduronic acid,5-[3-[(2,2,3,3-tetramethylcyclopropyl)carbonyl]-1H-indol-1-yl]pentyl	Organic acids	有机酸	Organic acids	有机酸	C27H37NO8	3	0.7515	1630023-01-6	271222	252462	183883	1.40177e+06	1.48991e+06	1.52096e+06	1.34318	2.00521e-05	0.00135636	6.23636	2.6407	up
MW0118662	2-Mercapto-5-benzimidazolecarboxylic acid	2-巯基-5-苯并咪唑羧酸	Organic acids	有机酸	Organic acids	有机酸	C8H6N2O2S	3	0.7499	58089-25-1	969.41	487.53	803.37	5672.43	4840.5	3162.49	1.29857	0.0318087	0.0878082	6.05024	2.59699	up
MW0002734	2-Benzoylbenzoic acid	2-苯甲酰基苯甲酸	Benzene and substituted derivatives	苯及其衍生物	Benzene and substituted derivatives	苯及其衍生物	C14H10O3	3	0.7496	85-52-9 | 27458-06-6	541.6	467.26	688.04	3671.94	9642.13	8760.28	1.31075	0.0673481	0.150405	13.0086	3.7014	up
MW0141011	1(2H)-Phthalazinone	1(2H)-酞嗪酮	Others	其它类	Ketone compounds	酮类化合物	C8H6N2O	3	0.7492	119-39-1 | 62054-23-3	4367.44	1332.09	2763.19	9374.4	8003.01	6868.2	1.15202	0.0106875	0.0403246	2.86499	1.51853	up
MW0115052	(6aR,9R,9aR)-9-acetyl-3-[(1E,3E,5S)-3,5-dimethylhepta-1,3-dienyl]-6a-methyl-9,9a-dihydrofuro[2,3-h]isochromene-6,8-dione	(6aR,9R,9aR)-9-acetyl-3-[(1E,3E,5S)-3,5-dimethylhepta-1,3-dienyl]-6a-methyl-9,9a-dihydrofuro[2,3- h]isochromene-6,8-dione	Others	其它类	Ketone compounds	酮类化合物	C23H26O5	3	0.7485	53014-38-3	25358.9	16495.3	16338.1	3104.37	3593.12	4747.99	1.31893	0.0318769	0.0879217	0.196684	-2.34605	down
MEDN1359	2,4-Dihydroxypyridine	2,4-二羟基吡啶	Alkaloids	生物碱	Pyridine alkaloids	吡啶类生物碱	C5H5NO2	3	0.7482	626-03-9 | 84719-31-3 | 29212-35-9	1444.39	1953.69	862.17	3627.46	2179.16	3633.23	1.10315	0.048868	0.119042	2.2158	1.14783	up
MW0121732	2,6-Diamino-4-(2-pyridyl)-s-triazine	2,6-二氨基-4-(2-吡啶基)-s-三嗪	Heterocyclic compounds	杂环化合物	Heterocyclic compounds	杂环化合物	C8H8N6	3	0.7472	25007-79-8	424.02	1399.17	1562.01	11027.8	11262.6	9684.33	1.27861	0.000177196	0.00340815	9.44545	3.23962	up
MW0116152	[(6-Methyl-benzothiazol-2-ylcarbamoyl)-methyl-sulfanyl]-acetic acid	[(6-甲基-苯并噻唑-2-基氨基甲酰基)-甲基硫烷基]-乙酸	Organic acids	有机酸	Organic acids	有机酸	C12H12N2O3S2	3	0.7459	332383-09-2	11904.3	18217.2	8316.83	26904	26640.1	23620.2	1.15297	0.0345803	0.0930491	2.00748	1.00539	up
MW0116798	2,3-Dihydroindol-1-Yl-(2-Thiophen-3-Yl-1,3-Thiazol-4-Yl)methanone	2,3-Dihydroindol-1-Yl-(2-Thiophen-3-Yl-1,3-Thiazol-4-Yl)methanone	Alkaloids	生物碱	Plumerane	吲哚类生物碱	C16H12N2OS2	3	0.7435	879345-45-6	6135.93	8193.67	10071.8	1553.41	1556.02	4368.26	1.17276	0.0199067	0.0624581	0.306445	-1.7063	down
MW0122348	7-Amino-2-methylpyrazolo[1,5-a]pyrimidine-6-carbonitrile	7-氨基-2-甲基吡唑并[1,5-a]嘧啶-6-甲腈	Heterocyclic compounds	杂环化合物	Heterocyclic compounds	杂环化合物	C8H7N5	3	0.741	255389-59-4	3413.14	4325.23	5159.27	396.36	816.47	3373.39	1.00458	0.0769478	0.165639	0.355586	-1.49173	down
MEDP1674	Val-Val-Val	Val-Val-Val	Amino acids and derivatives	氨基酸及其衍生物	Amino acids and derivatives	氨基酸及其衍生物	C15H29N3O4	3	0.7406	28130-13-4	26937	27449.9	26884.5	57734.4	68593.3	65260.3	1.34524	0.00739621	0.0310612	2.35739	1.23719	up
MW0140114	(+)-Galbacin	（-)-半乳糖素	Lignans and Coumarins	木脂素和香豆素	Lignans	木脂素	C20H20O5	3	0.7395	61891-31-4	60623.6	109182	137341	316625	337888	364572	1.26098	0.00187334	0.0125165	3.31792	1.73028	up
MW0115750	N-Acetyl-3,4-methylenedioxyamphetamine	N-Acetyl-3,4-亚甲二氧苯丙胺	Alcohol and amines	醇、胺类	Amines	胺类	C12H15NO3	3	0.7381	36209-71-9	1609.18	1394.83	4280.33	6148.38	5247.63	5335.21	1.08935	0.0660876	0.148252	2.29688	1.19967	up
MW0116677	1,3-Oxathiolan-2-one	1,3-Oxathiolan-2-one	Others	其它类	Ketone compounds	酮类化合物	C3H4O2S	3	0.7376	3326-89-4	559.89	843.58	899.72	354.78	516.43	155.9	1.03059	0.0453722	0.113057	0.445951	-1.16504	down
MEDP1186	Methyl-2-pyrrolidone-5-carboxylate	2-吡咯烷酮-5-羧酸甲酯	Others	其它类	Lactones	内酯类化合物	C6H9NO3	3	0.735	4931-66-2	6963.5	6951.16	5465.88	16413.3	18888.2	19238.5	1.33288	0.00113773	0.00951711	2.81416	1.49271	up
MEDL00853	Oxfenicine	4-羟基-L-苯甘氨酸	Amino acids and derivatives	氨基酸及其衍生物	Amino acids and derivatives	氨基酸及其衍生物	C8H9NO3	3	0.735	32462-30-9	115985	115880	113251	311742	321852	341656	1.35298	0.00158864	0.0113867	2.82586	1.49869	up
MW0103202	Zygadenine	棋盘花碱	Alkaloids	生物碱	Steroid alkaloids	甾体类生物碱	C27H43NO7	3	0.7335	545-45-9	782.44	693.63	474.31	259.9	393.74	237.68	1.18681	0.0413345	0.106137	0.456998	-1.12974	down
MW0168098	6-O-(6-deoxy-alpha-L-mannopyranosyl)-beta-D-glucopyranose	芸香糖	Others	其它类	Saccharides	糖类	C12H22O10	3	0.7318	26184-96-3	11501.7	18483.4	10903.8	324.38	141.96	2695.43	1.19011	0.0256961	0.0753216	0.077326	-3.6929	down
MW0115963	5-Methoxyindole-3-acetonitrile	5-甲氧基吲哚-3-乙腈	Alkaloids	生物碱	Plumerane	吲哚类生物碱	C11H10N2O	3	0.7308	2436-17-1	1349.28	1883.82	2621.31	10732.9	14481.5	10335.5	1.31781	0.0124347	0.0448352	6.07232	2.60225	up
MW0116786	1-[4-(Acetylamino)phenyl]-5-oxopyrrolidine-3-carboxylic acid	1-[4-(乙酰氨基)苯基]-5-氧代吡咯烷-3-羧酸	Organic acids	有机酸	Organic acids	有机酸	C13H14N2O4	3	0.7282	133749-16-3	83909.9	69076.6	68108.7	33383.7	40192.4	33391.3	1.31398	0.00845444	0.03433	0.483807	-1.0475	down
MW0158340	Tutin	羟基马桑毒素	Terpenoids	萜类	Sesquiterpenoids	倍半萜	C15H18O6	3	0.7272	2571-22-4	40976.6	20403.8	24820.8	53390.7	68897.9	56283.3	1.17253	0.0196824	0.0619637	2.07157	1.05073	up
MW0105442	Agaric acid	木耳酸	Organic acids	有机酸	Organic acids	有机酸	C22H40O7	3	0.7263	666-99-9	5668.3	3511.57	3272.36	14957.7	17910.7	17442.8	1.31276	0.000533377	0.00620526	4.04033	2.01447	up
MW0012799	Napellonine	一枝蒿庚素; 准葛尔乌头碱	Alkaloids	生物碱	Terpenoid alkaloids	萜类生物碱	C22H31NO3	3	0.7248	509-24-0	24277.4	17628.7	16384.8	5511.25	7656.47	8324.05	1.27928	0.0272701	0.078409	0.368699	-1.43949	down
MW0141291	11-Hydroxycanthin-6-one	11-羟基铁屎米-6-酮	Alkaloids	生物碱	Plumerane	吲哚类生物碱	C14H8N2O2	3	0.7243	75969-83-4	19769.4	36045.7	20923.7	5123.25	2831.9	5903.83	1.28142	0.0533601	0.126281	0.1806	-2.46913	down
MW0008439	N-(p-Tolyl)-1-naphthylamine	N-(对甲苯基)-1-萘胺	Benzene and substituted derivatives	苯及其衍生物	Benzene and substituted derivatives	苯及其衍生物	C17H15N	3	0.7227	634-43-5	1003.53	64.38	407.93	2295.28	5533.34	5613.72	1.13382	0.0599221	0.137506	9.10826	3.18718	up
MEDP1464	1,3-Diphenylguanidine	1,3-二苯基胍	Alcohol and amines	醇、胺类	Polyamines	多胺	C13H13N3	3	0.7201	102-06-7	33609	34568	41494.6	111027	122797	119817	1.34478	0.000101984	0.00256747	3.22454	1.68909	up
MW0118667	2-Mercaptonicotinonitrile	2-巯基烟腈	Heterocyclic compounds	杂环化合物	Heterocyclic compounds	杂环化合物	C6H4N2S	3	0.7186	52505-45-0	45193.7	22892.5	31361.9	5783.03	5412.12	9073.24	1.28977	0.0516281	0.123313	0.203809	-2.29471	down
MW0009479	Piperidolate	哌啶醇	Benzene and substituted derivatives	苯及其衍生物	Benzene and substituted derivatives	苯及其衍生物	C21H25NO2	3	0.718	82-98-4	7482.1	6136.28	7552.6	986.81	1612.19	1851.33	1.31298	0.00148134	0.0110045	0.210209	-2.2501	down
MW0141403	[(1S,2R,3R,4S,5S,6S,8R,9S,10S,13S,16S,17R,18S)-11-ethyl-4,8,9-trihydroxy-6,16,18-trimethoxy-11-azahexacyclo[7.7.2.12,5.01,10.03,8.013,17]nonadecan-13-yl]methyl 2-[(3S)-3-methyl-2,5-dioxopyrrolidin-1-yl]benzoate	[(1S,2R,3R,4S,5S,6S,8R,9S,10S,13S,16S,17R,18S)-11-ethyl-4,8,9-trihydroxy-6,16,18-trimethoxy-11-azahexacyclo[7.7.2.12,5.01,10.03,8.013,17]nonadecan-13-yl]methyl 2-[(3S)-3-methyl-2,5-dioxopyrrolidin-1-yl]benzoate	Benzene and substituted derivatives	苯及其衍生物	Benzene and substituted derivatives	苯及其衍生物	C36H48N2O10	3	0.7179	119347-24-9	76350	87219	78558.5	34161.7	39579	33773.2	1.33772	0.00102678	0.00902042	0.444039	-1.17124	down
MW0118739	2-Methyl-4-phenylthiazole	2-甲基-4-苯基噻唑	Heterocyclic compounds	杂环化合物	Heterocyclic compounds	杂环化合物	C10H9NS	3	0.7156	1826-16-0	59420.3	38042.7	43844.3	11184.5	1871.84	12324.2	1.14591	0.0125757	0.045181	0.179613	-2.47704	down
MEDP1836	Nootkatone	圆柚酮	Terpenoids	萜类	Sesquiterpenoids	倍半萜	C15H22O	3	0.7151	4674-50-4 | 28834-25-5	80738.5	47441.7	61413.8	17360.3	29126.5	26855.7	1.22762	0.0433821	0.109533	0.38684	-1.37019	down
MW0000577	Aconiazide	附子	Benzene and substituted derivatives	苯及其衍生物	Benzene and substituted derivatives	苯及其衍生物	C15H13N3O4	3	0.7135	13410-86-1	1283.91	1277.83	2052.42	6248.26	2712.82	2151.2	1.0039	0.23026	0.365638	2.4083	1.26801	up
MW0116594	2-Mercapto-3-phenyl-3H-quinazolin-4-one	2-Mercapto-3-phenyl-3H-quinazolin-4-one	Others	其它类	Ketone compounds	酮类化合物	C14H10N2OS	3	0.7129	18741-24-7 | 2400-99-9	7786.68	12823.8	13028.2	116274	130527	118037	1.3414	0.000477987	0.00584096	10.8458	3.43907	up
MW0154645	N-Succinyl-5-aminoimidazole-4-carboxamide ribose	N-Succinyl-5-aminoimidazole-4-carboxamide ribose	Organic acids	有机酸	Organic acids	有机酸	C13H18N4O9	3	0.7126	17388-80-6	39479.1	34133.4	38942.3	4281.32	4953.56	7120.63	1.33751	0.000496859	0.00595378	0.145311	-2.78278	down
MEDP1243	4-Hydroxytryptamine	4-羟基色胺	Tryptamines,Cholines,Pigments	色胺、胆碱、色素	Tryptamines	色胺	C10H12N2O	3	0.7121	570-14-9	27176.6	25611.3	23205.9	88968.3	93212.2	102943	1.34878	0.00197317	0.0128198	3.75193	1.90763	up
MW0132544	3',4',6-TRIMETHOXYISOFLAVONE-7-O-beta-D-GLUCOPYRANOSIDE	3',4',6-三甲氧基异黄酮-7-O-β-D-吡喃葡萄糖苷	Flavonoids	黄酮	Flavones	黄酮	C24H26O11	3	0.7098	59183-50-5	123040	89656.8	48467.6	197899	180550	186698	1.13386	0.0365008	0.0967308	2.16395	1.11367	up
MW0003323	2-Phenyl-1,2,4-triazaspiro[4.5]dec-3-ene-3-thiol	2-Phenyl-1,2,4-triazaspiro[4.5]dec-3-ene-3-thiol	Benzene and substituted derivatives	苯及其衍生物	Benzene and substituted derivatives	苯及其衍生物	C13H17N3S	3	0.7092	39263-81-5	4669.57	7948.2	3006.92	20583.4	13214.1	20132.9	1.21823	0.0158707	0.0534033	3.45161	1.78727	up
MW0142881	3-Deacetylsalannin	3-Deacetylsalannin	Terpenoids	萜类	Triterpene	三萜	C32H42O8	3	0.7082	1110-56-1	790.68	290.34	257.92	1077.97	2261.43	1210.24	1.13577	0.086138	0.179309	3.39794	1.76466	up
MW0125794	Nicotelline	尼可替林	Alkaloids	生物碱	Pyridine alkaloids	吡啶类生物碱	C15H11N3	3	0.708	494-04-2	158.87	2893.23	27.69	12779.9	6046.9	3879.13	1.04057	0.122842	0.23242	7.37255	2.88216	up
MW0145976	Z-Asn-Gly-OH	Z-Asn-Gly-OH	Amino acids and derivatives	氨基酸及其衍生物	Amino acids and derivatives	氨基酸及其衍生物	C14H17N3O6	3	0.7061	56675-97-9	71958.6	71396.4	75883.9	30478.8	33196.3	32962.7	1.35043	6.97347e-05	0.00216912	0.440788	-1.18184	down
MW0104062	[1-(4-Hydroxyphenoxy)-1-phosphonoethyl]phosphonic acid	[1-(4-羟基苯氧基)-1-膦酰基乙基]膦酸	Organic acids	有机酸	Organic acids	有机酸	C8H12O8P2	3	0.7057	142523-38-4	213.44	164.58	238.92	732.26	937.01	722.19	1.32748	0.00874835	0.0351285	3.87633	1.95469	up
MW0155616	Plaunol B	普劳诺B	Others	其它类	Lactones	内酯类化合物	C20H20O6	3	0.7055	69749-00-4	1669.15	1933.58	1806.04	403.95	850.68	1183.15	1.09808	0.0371208	0.0979791	0.450709	-1.14973	down
MW0117846	1,2,3,4-Tetrahydro-2,3-dioxoquinoxaline-6-carboxylic acid	1,2,3,4-四氢-2,3-二氧喹喔啉-6-羧酸	Organic acids	有机酸	Organic acids	有机酸	C9H6N2O4	3	0.7049	14121-55-2	10271.7	6416.63	8417.45	2769.28	3585.35	1168.78	1.17882	0.0163071	0.0543654	0.299669	-1.73856	down
MW0110910	Aminophylline	氨茶碱	Alkaloids	生物碱	Alkaloids	生物碱	C16H24N10O4	3	0.7046	317-34-0 | 95646-60-9	2116.44	7283.7	4424.32	7259.49	11909.9	12035.8	1.02219	0.0558687	0.130764	2.25724	1.17456	up
MW0157471	Thalicoside A	唐松草苷A	Terpenoids	萜类	Triterpene	三萜	C42H70O14	3	0.7041	93208-45-8	873386	986374	223619	113874	96841.8	43959.5	1.18202	0.123199	0.232825	0.122241	-3.0322	down
MW0168385	Lacidipine	拉西地平	Organic acids	有机酸	Organic acids	有机酸	C26H33NO6	3	0.7029	103890-78-4	12430.1	12767.1	9314.17	46585	36456.1	58036.5	1.31739	0.0264337	0.0770263	4.08785	2.03134	up
MW0001062	N-Isopropylmethoxamine	N-异丙基甲氧胺	Benzene and substituted derivatives	苯及其衍生物	Benzene and substituted derivatives	苯及其衍生物	C14H23NO3	3	0.7028	550-53-8	7737.34	11401.5	10236.5	25010.5	23306.8	25518.6	1.31339	0.000809689	0.00785171	2.51353	1.32972	up
MW0115891	(3-Iodo-pyridin-4-yl)-carbamic acid tert-butyl ester	(3-碘-吡啶-4-基)-氨基甲酸叔丁酯	Organic acids	有机酸	Organic acids	有机酸	C10H13IN2O2	3	0.701	211029-67-3	4142.94	1865.5	3044.04	17071.6	12246.9	17086.2	1.29479	0.0083919	0.0341624	5.12618	2.35788	up
MW0117491	2-(Thiophen-2-yl)thiazole-4-carboxylic acid	2-(噻吩-2-基)噻唑-4-羧酸	Organic acids	有机酸	Organic acids	有机酸	C8H5NO2S2	3	0.7007	24044-07-3	1003.55	224.98	463.05	11278.8	11777.2	12765.5	1.30844	0.000166781	0.00331573	21.1763	4.40438	up
MW0131145	3-(3,4-Dimethoxyphenyl)-6-methyl-4-phenylchromen-2-one	3-(3,4-二甲氧基苯基)-6-甲基-4-苯基色烯-2-one	Lignans and Coumarins	木脂素和香豆素	Coumarins	香豆素	C24H20O4	3	0.7001	720675-47-8	4700.1	10105.1	7156.37	18852	12616.8	17824	1.15963	0.0230534	0.0697393	2.24451	1.1664	up
MW0003200	2-Methoxy-6-nitrobenzonitrile	2-甲氧基-6-硝基苄腈	Benzene and substituted derivatives	苯及其衍生物	Benzene and substituted derivatives	苯及其衍生物	C8H6N2O3	3	0.7	38469-85-1	167218	62825.7	111542	22085.5	8568.52	23131.9	1.23042	0.0828874	0.174386	0.15746	-2.66695	down
MW0015797	Anisatin	莽草毒素	Heterocyclic compounds	杂环化合物	Heterocyclic compounds	杂环化合物	C15H20O8	3	0.6999	5230-87-5	4337.41	4024.58	3444.96	9211.49	7420.62	9925.52	1.30668	0.0142164	0.04916	2.24932	1.16949	up
MW0112038	2-acetamido-2-deoxy-3-O-(alpha-L-fucopyranosyl)-D-glucopyranose	2-acetamido-2-deoxy-3-O-(alpha-L-fucopyranosyl)-D-glucopyranose	Others	其它类	Saccharides	糖类	C14H25NO10	3	0.6998	209977-50-4 | 24876-86-6	21596.8	20647.6	20418.6	3379.59	1764.65	1998.91	1.33347	1.8105e-05	0.00133941	0.113993	-3.13298	down
MW0121444	5-Ethynyl-1H-indole	5-Ethynyl-1H-吲哚	Alkaloids	生物碱	Plumerane	吲哚类生物碱	C10H7N	3	0.6996	889108-48-9	8290.58	9353.57	7200.13	35692.2	35120.9	37524.3	1.34743	1.01722e-05	0.00116551	4.36066	2.12455	up
MW0167999	(6R)-5,10-Methylenetetrahydrofolate	(6R)-5,10-亚甲基四氢叶酸	Others	其它类	Others	其它	C20H23N7O6	3	0.6991	31690-11-6 | 3432-99-3	17689.6	3622.84	10052.1	53228.9	56978.7	57408.2	1.21253	0.00434338	0.0212872	5.34412	2.41795	up
MW0001383	1,5-Diphenoxyanthraquinone	1,5-二苯氧基蒽醌	Benzene and substituted derivatives	苯及其衍生物	Benzene and substituted derivatives	苯及其衍生物	C26H16O4	3	0.6991	82-21-3	380.81	1758.64	1250.12	3035.01	2430.95	3568.59	1.04339	0.0238447	0.0711728	2.6654	1.41435	up
MW0000049	N-Nitrosoanabasine	N-亚硝基烟碱	Alkaloids	生物碱	Alkaloids	生物碱	C10H13N3O	3	0.6989	1133-64-8	10337.8	10968.7	8404.39	92740.4	74305.8	83312.5	1.34863	0.00449932	0.0217796	8.42652	3.07494	up
MW0127216	2-(Octylthio)ethanol	2-(辛硫基)乙醇	Alcohol and amines	醇、胺类	Alcohols	醇类	C10H22OS	3	0.6988	3547-33-9	17629.7	12240.4	9174.54	4675.18	2721.02	5733.12	1.19751	0.0596549	0.137086	0.336265	-1.57233	down
MW0118300	2-Benzimidazolylguanidine	2-苯并咪唑胍	Benzene and substituted derivatives	苯及其衍生物	Benzene and substituted derivatives	苯及其衍生物	C8H9N5	3	0.6966	5418-95-1	87.08	361.89	4861.22	60674.6	62558.1	56510.3	1.2126	1.92174e-05	0.00135636	33.8487	5.08103	up
MW0052770	Etretinate	依曲坦	Others	其它类	Lactones	内酯类化合物	C23H30O3	3	0.6965	54350-48-0	11370.5	13990.1	17612.6	48946.8	54212.2	62978.4	1.32504	0.0038307	0.0194862	3.86606	1.95086	up
MW0108481	N-(tert-Butoxycarbonyl)-L-leucine	N-(叔丁氧羰基)-L-亮氨酸	Amino acids and derivatives	氨基酸及其衍生物	Amino acids and derivatives	氨基酸及其衍生物	C11H21NO4	3	0.6963	13139-15-6 | 53296-34-7	34512.5	42525.1	40291.3	4279.79	7694.45	387.62	1.13516	0.000423311	0.00548624	0.105361	-3.24659	down
MW0141115	1,2-Dihydroxyfluorene	1，2-二羟基芴	Benzene and substituted derivatives	苯及其衍生物	Benzene and substituted derivatives	苯及其衍生物	C13H10O2	3	0.6957	42523-11-5	93575.3	76714.4	61625.2	22657.4	52563.5	36197.6	1.10993	0.0338545	0.0916652	0.480429	-1.05761	down
MW0139669	Schisandrin B	五味子乙素	Lignans and Coumarins	木脂素和香豆素	Lignans	木脂素	C23H28O6	3	0.6951	61281-37-6	61714.8	32096.2	61106.2	124036	136582	143420	1.2395	0.00411842	0.0205794	2.60809	1.38299	up
MW0111426	3-Amino-2-Benzoyl-4-Methylthieno[2,3-B]pyridin-6-Ol	3-Amino-2-Benzoyl-4-Methylthieno[2,3-B]pyridin-6-Ol	Others	其它类	Ketone compounds	酮类化合物	C15H12N2O2S	3	0.6941	93272-87-8	8484.74	3903.37	7995.85	3849.66	1562.5	3422.02	1.0147	0.100468	0.20072	0.433389	-1.20627	down
MW0008806	N(4)-Acetylsulfadiazine	N-乙酰磺胺嘧啶	Benzene and substituted derivatives	苯及其衍生物	Benzene and substituted derivatives	苯及其衍生物	C12H12N4O3S	3	0.6916	127-74-2 | 5572-57-6	112369	120427	82879	23459.5	39205.6	39365	1.27435	0.0128853	0.0458749	0.323213	-1.62944	down
MW0144436	Agroclavine	农棒菌	Alkaloids	生物碱	Alkaloids	生物碱	C16H18N2	3	0.6912	548-42-5	6371.42	2325.74	3825.26	5831.57	14809.8	14762.8	1.04768	0.110844	0.216136	2.82726	1.4994	up
MEDP2086	h-d-Tyr-otbu	D-酪氨酸叔丁酯	Benzene and substituted derivatives	苯及其衍生物	Benzene and substituted derivatives	苯及其衍生物	C13H19NO3	3	0.6883	87553-74-0	15216.4	11252.6	12689	77507.1	84334.9	81507	1.34823	4.83429e-05	0.00194628	6.21454	2.63565	up
MW0117533	2-(3-Nitrophenyl)quinoline-4-carboxylic acid	2-(3-硝基苯基)喹啉-4-羧酸	Organic acids	有机酸	Organic acids	有机酸	C16H10N2O4	3	0.6881	70097-12-0 | 572900-39-1	6641.52	6239.51	2825.18	17301.6	11837.8	16644.4	1.19458	0.0115734	0.0426281	2.91501	1.5435	up
MW0126537	Sempervirene	常绿钩吻碱	Alkaloids	生物碱	Plumerane	吲哚类生物碱	C19H16N2	3	0.6872	549-92-8	463.82	362.03	307.12	9283.29	10790.2	11664.5	1.35034	0.00447315	0.0217177	28.0131	4.80803	up
MW0105559	Ala-Ser	Ala-Ser	Amino acids and derivatives	氨基酸及其衍生物	Amino acids and derivatives	氨基酸及其衍生物	C6H12N2O4	3	0.6866	3303-41-1	198143	196828	205937	475486	503242	586923	1.34275	0.0102596	0.0392107	2.60548	1.38155	up
MW0012822	Azelaoyl PAF	壬二酰基PAF	GP	甘油磷脂类	PA	磷脂酸	C33H66NO9P	3	0.6866	354583-69-0	41453	27571.3	43345	74436.9	66339.7	125818	1.17239	0.1014	0.201775	2.37249	1.2464	up
MW0012950	1-O-Octadecyl-2-O-methyl-sn-glycero-3-phosphocholine	2-O-甲基PAF C-18	GP	甘油磷脂类	PC	磷脂酰胆碱	C27H58NO6P	3	0.6863	77286-66-9	8129.65	12500.1	10030.3	2673.1	3018.03	3443.02	1.31732	0.0267012	0.0774932	0.297917	-1.74702	down
MW0145581	Arg-Arg-Lys-Ala-Ser-Gly-Pro	Arg-Arg-Lys-Ala-Ser-Gly-Pro	Amino acids and derivatives	氨基酸及其衍生物	Amino acids and derivatives	氨基酸及其衍生物	C31H58N14O9	3	0.6857	65189-70-0	180282	139884	161757	85316.2	25429.5	39258.1	1.18216	0.0103011	0.0393232	0.311261	-1.6838	down
MW0119368	3-Allyl-5-(1-methyl-1H-pyridin-2-ylidene)-2-thioxo-thiazolidin-4-one	3-Allyl-5-(1-methyl-1H-pyridin-2-ylidene)-2-thioxo-thiazolidin-4-one	Others	其它类	Ketone compounds	酮类化合物	C12H12N2OS2	3	0.6855	34330-15-9	41220.9	31803.1	55269.2	17597.7	20246.1	15357.8	1.25163	0.0613741	0.140194	0.414688	-1.2699	down
MW0140902	[Ile7] Angiotensin III	[Ile7] Angiotensin III	Others	其它类	Others	其它	C43H68N12O9	3	0.6855	52498-25-6	467.52	645.78	233.69	55.33	236.03	43.5	1.0807	0.0867931	0.180327	0.248599	-2.00811	down
MW0144926	2-Amino-4-cyanobutanoic acid	α-氨基-γ-氰基丁酸酯；2-氨基-4-氰基丁酸	Organic acids	有机酸	Organic acids	有机酸	C5H8N2O2	3	0.6855	16051-93-7	348236	353969	347189	831488	1.32218e+06	940035	1.31096	0.0445017	0.111271	2.94808	1.55978	up
MW0125695	N-cyclohexyl-4-methylpiperazine-1-carboxamide	N-环己基-4-甲基哌嗪-1-甲酰胺	Alcohol and amines	醇、胺类	Amines	胺类	C12H23N3O	3	0.6851	116818-73-6	2793.99	7142.33	5408.52	25177.7	18301.2	13288.1	1.21418	0.0438891	0.110248	3.69942	1.8873	up
MW0116019	3,4-Methylenedioxycinnamaldehyde	3,4-亚甲基二氧肉桂醛	Others	其它类	Aldehyde compounds	醛类化合物	C10H8O3	3	0.6849	14756-00-4 | 58095-77-5	572.37	104.08	104.04	988.88	1188.43	675.91	1.09276	0.0329957	0.0897849	3.65568	1.87014	up
MW0144464	Ala-Ala-Tyr	L-丙氨酰-L-丙氨酰-L-酪氨酸	Amino acids and derivatives	氨基酸及其衍生物	Amino acids and derivatives	氨基酸及其衍生物	C15H21N3O5	3	0.6846	67131-52-6	35290	29917	30405.2	10824.7	16183.4	15839.7	1.28087	0.00195705	0.0127996	0.448142	-1.15797	down
MEDP1682	Leu-Gly-Phe	L-亮氨酸-L-甘氨酸-L-苯丙氨酸	Amino acids and derivatives	氨基酸及其衍生物	Amino acids and derivatives	氨基酸及其衍生物	C17H25N3O4	3	0.6845	17608-53-6	71232.1	63719.2	36961.6	111831	116867	159246	1.18649	0.0212424	0.0654178	2.25663	1.17417	up
MW0109627	L-Seryl-L-lysyl-L-lysine	L-丝氨酰-L-赖氨酰-L-赖氨酸	Amino acids and derivatives	氨基酸及其衍生物	Amino acids and derivatives	氨基酸及其衍生物	C15H31N5O5	3	0.684	213187-86-1	171366	158048	159146	31504.6	35343.3	34363.2	1.35294	0.000538699	0.00620937	0.207162	-2.27117	down
MEDP1359	Asterina 330	Asterina 330	Amino acids and derivatives	氨基酸及其衍生物	Amino acids and derivatives	氨基酸及其衍生物	C12H20N2O6	3	0.6838	84563-31-5	7898.27	8783.2	8016.78	2047.03	4002.63	4132.88	1.21357	0.0100788	0.0388165	0.412278	-1.27831	down
MW0127323	4-(Phenylthio)phthalonitrile	4-(苯硫基)邻苯二甲腈	Heterocyclic compounds	杂环化合物	Heterocyclic compounds	杂环化合物	C14H8N2S	3	0.6814	77474-63-6	7700.62	7512.07	7797.28	3299.32	1434.29	892.49	1.2163	0.0145196	0.0499693	0.244507	-2.03205	down
MW0109645	Ser-Ala	丝氨酸丙氨酸	Amino acids and derivatives	氨基酸及其衍生物	Amino acids and derivatives	氨基酸及其衍生物	C6H12N2O4	3	0.6808	6403-17-4	18108.9	23888.4	18779.2	165999	178046	167389	1.35028	6.83707e-05	0.00214724	8.41499	3.07296	up
MW0063313	Reciniferatoxin	树脂毒素	Terpenoids	萜类	Ditepenoids	二萜	C37H40O9	3	0.6802	57444-62-9	69950.4	64123.4	68188.8	172719	191876	178477	1.35043	0.00119044	0.00978391	2.68498	1.42491	up
MW0123302	Chlamydospordiol	衣藻二醇	Alcohol and amines	醇、胺类	Alcohols	醇类	C11H16O5	3	0.6789	157998-92-0	497.65	1480.48	353.29	3454.12	1918.58	4735.02	1.14421	0.0689848	0.152832	4.33544	2.11618	up
MW0123506	Decoyinine	癸二胺	Heterocyclic compounds	杂环化合物	Heterocyclic compounds	杂环化合物	C11H13N5O4	3	0.6779	2004-04-8	38502.8	30889	31499	7665.87	3129.31	12445.3	1.20753	0.00212469	0.0133714	0.230353	-2.11808	down
MW0011435	Icariside C(1)	伊卡里西 C(1)	Terpenoids	萜类	Terpene	萜类	C21H38O8	3	0.6764	108906-50-9	2226.57	2107.14	2536.26	1392.95	736.01	1084.78	1.21697	0.00859951	0.0346721	0.467795	-1.09605	down
MW0119900	4-(4-Amino-3-nitrophenyl)phthalazin-1-ol	4-(4-Amino-3-nitrophenyl)phthalazin-1-ol	Others	其它类	Ketone compounds	酮类化合物	C14H10N4O3	3	0.6755	58370-64-2	247501	233675	240091	115109	121016	115847	1.35223	0.000153586	0.00318827	0.48799	-1.03508	down
MW0123902	ethyl 5-[(methylamino)carbonyl]-10,11-dihydro-5H-dibenzo[b,f]azepin-3-ylcarbamate	5-[(甲氨基)羰基]-10,11-二氢-5H-二苯并[b,f]azepin-3-ylcarbamate乙酯	Benzene and substituted derivatives	苯及其衍生物	Benzene and substituted derivatives	苯及其衍生物	C19H21N3O3	3	0.6755	5957-43-7 | 332873-88-8	1032.72	659.39	1293.51	3101.16	3995.54	4537.72	1.28728	0.0104718	0.0398578	3.89682	1.9623	up
MW0120062	2-Methyl-4,5-diphenyl-1H-imidazole	2-甲基-4,5-二苯基-1H-咪唑	Heterocyclic compounds	杂环化合物	Heterocyclic compounds	杂环化合物	C16H14N2	3	0.6749	2818-82-8	40548.5	37166.4	41505.5	17397.9	16042.7	18818.8	1.3423	0.000419581	0.0054773	0.438343	-1.18987	down
MEDN1166	4-Hydroxybenzenesulfonic acid	4-羟基苯磺酸	Organic acids	有机酸	Organic acids	有机酸	C6H6O4S	3	0.6739	98-67-9	4280.63	4417.81	2668.25	342.06	792.31	704.09	1.28572	0.0244626	0.072582	0.161741	-2.62824	down
MW0117156	1-Hydroxyphenazine	1-羟基吩嗪	Heterocyclic compounds	杂环化合物	Heterocyclic compounds	杂环化合物	C12H8N2O	3	0.673	528-71-2	487.44	190.61	311.22	4559.37	4707.65	3742.52	1.32524	0.00327075	0.0177045	13.1506	3.71706	up
MW0004026	1H,3H-Naphtho[1,8-cd]pyran-1-one, 3-hydroxy-	1H,3H-Naphtho[1,8-cd]pyran-1-one, 3-hydroxy-	Benzene and substituted derivatives	苯及其衍生物	Benzene and substituted derivatives	苯及其衍生物	C12H8O3	3	0.6727	5656-90-6	3916.63	4251.94	6323.99	2571.89	655.9	500.79	1.13297	0.0239681	0.0714035	0.257275	-1.95861	down
MW0144229	Acanthoside D	无梗五加苷 D	Lignans and Coumarins	木脂素和香豆素	Lignans	木脂素	C34H46O18	3	0.6705	66791-77-3	22722.3	16313.7	20829.1	44102.9	34891.3	42340.4	1.28044	0.00580198	0.0259057	2.0268	1.01921	up
MW0003193	(E)-5-((2,4,6-trimethoxystyrylsulfonyl)methyl)-2-methoxybenzenamine	(E)-5-((2,4,6-三甲氧基苯乙烯基磺酰基)甲基)-2-甲氧基苯胺	Phenolic acids	酚酸类	Phenolic acids	酚酸类	C19H23NO6S	3	0.6702	592542-50-2	12728.9	10372.6	14307.9	48313.4	38700.7	57442	1.32326	0.0186467	0.0595394	3.86149	1.94916	up
MW0009823	Sulprofos sulfoxide	磺基亚砜	Benzene and substituted derivatives	苯及其衍生物	Benzene and substituted derivatives	苯及其衍生物	C12H19O3PS3	3	0.6701	34643-47-5	1170.24	262.87	1039.04	1968.98	2873.4	3593.5	1.09019	0.0311486	0.0864634	3.41237	1.77077	up
MW0004452	4,4'-Oxybis(benzoylhydrazide)	4,4'-氧双(苯甲酰肼)	Benzene and substituted derivatives	苯及其衍生物	Benzene and substituted derivatives	苯及其衍生物	C14H14N4O3	3	0.6692	13092-49-4	162002	148241	145145	30584.6	26355.1	21109.4	1.34416	0.000203907	0.00371316	0.171391	-2.54464	down
MW0116068	Demethylated Cyclopeptin	去甲基化环肽素	Benzene and substituted derivatives	苯及其衍生物	Benzene and substituted derivatives	苯及其衍生物	C16H14N2O2	3	0.666	32781-96-7	2627.86	3466.01	5618.54	9664.29	9743.02	11168.1	1.23573	0.00768221	0.0318711	2.61051	1.38433	up
MWS-04-288g_N	Phenyl dihydrogen phosphate	苯基磷酸	Benzene and substituted derivatives	苯及其衍生物	Benzene and substituted derivatives	苯及其衍生物	C6H7O4P	3	0.6648	701-64-4	8077.69	8679.97	7691.36	20849.6	23067.7	22106.8	1.3493	0.000462475	0.0057377	2.70048	1.43322	up
MW0105514	Ala-Gly	甘氨酸	Amino acids and derivatives	氨基酸及其衍生物	Amino acids and derivatives	氨基酸及其衍生物	C5H10N2O3	3	0.6646	687-69-4 | 25765-55-3	33443.4	35847	28919.6	128317	129936	164567	1.34165	0.010056	0.0387515	4.30527	2.1061	up
MW0119835	4-(2,6-Dioxo-1-propyl-3,7-dihydropurin-8-yl)benzenesulfonic acid	4-(2,6-Dioxo-1-propyl-3,7-dihydropurin-8-yl)benzenesulfonic acid	Organic acids	有机酸	Organic acids	有机酸	C14H14N4O5S	3	0.664	152529-79-8	10250.7	13758.7	20504.5	3988.73	2070.93	3863.49	1.2622	0.0565371	0.131968	0.222923	-2.16539	down
MW0152120	Lappaconitine	高乌甲素	Alkaloids	生物碱	Terpenoid alkaloids	萜类生物碱	C32H44N2O8	3	0.663	32854-75-4	96013.6	57919	48633.2	5536.17	10534.8	329.19	1.12004	0.0455836	0.11324	0.0809623	-3.62661	down
MW0156594	Huperizne	石杉碱	Heterocyclic compounds	杂环化合物	Heterocyclic compounds	杂环化合物	C15H18N2O	3	0.6626	116-28-9	10198.3	12402.6	11133.6	31454.6	33789.6	33015.8	1.34656	2.23532e-05	0.00139655	2.91274	1.54238	up
MW0118200	2-Aminobenzothiazole-6-carbonitrile	2-氨基苯并噻唑-6-甲腈	Benzene and substituted derivatives	苯及其衍生物	Benzene and substituted derivatives	苯及其衍生物	C8H5N3S	3	0.6603	19759-66-1	187202	75588.4	183505	65197.4	28724.8	38773.1	1.14035	0.0935983	0.190389	0.297326	-1.74988	down
MW0003798	3-Amino-5-sulfosalicylic acid	3-氨基-5-磺基水杨酸	Benzene and substituted derivatives	苯及其衍生物	Benzene and substituted derivatives	苯及其衍生物	C7H7NO6S	3	0.6598	6201-86-1	4837.48	5374.54	4722.93	1421.24	451.33	320.32	1.24733	0.00133813	0.0103685	0.146829	-2.76779	down
MW0001478	2H-Azepin-2-one, 1,1'-(1,3-phenylenedicarbonyl)bis[hexahydro-	2H-Azepin-2-one, 1,1'-(1,3-苯二羰基)双[六氢-	Benzene and substituted derivatives	苯及其衍生物	Benzene and substituted derivatives	苯及其衍生物	C20H24N2O4	3	0.659	7381-13-7	3216.04	2444.55	233.19	12865.7	14340	16674.3	1.12239	0.00107948	0.00923736	7.44514	2.8963	up
MW0001655	TCS JNK 5a	TCS JNK 5a	Benzene and substituted derivatives	苯及其衍生物	Benzene and substituted derivatives	苯及其衍生物	C20H16N2OS	3	0.656	312917-14-9	1925.86	1998.78	705.23	14109.3	12403.4	13343	1.29593	6.54133e-05	0.00212651	8.60838	3.10574	up
MW0152196	Leu-Ala-Gln	L-亮氨酸-L-丙氨酸-L-谷氨酰胺	Amino acids and derivatives	氨基酸及其衍生物	Amino acids and derivatives	氨基酸及其衍生物	C14H26N4O5	3	0.6555	85038-51-3	3487.42	1425.57	2562.95	14211.2	15275	9208.31	1.27319	0.0224597	0.068389	5.17587	2.3718	up
MW0143460	4-Formylbenzenesulfonic acid	4-磺基苯甲醛；4-甲酰基苯磺酸盐	Benzene and substituted derivatives	苯及其衍生物	Benzene and substituted derivatives	苯及其衍生物	C7H6O4S	3	0.6553	5363-54-2	34870.8	44862.3	32463.7	21843.8	18984.9	14436.8	1.24079	0.0200696	0.0627875	0.492576	-1.02158	down
MW0000546	2-(Diethylamino)-1-phenylpropan-1-OL	2-(二乙氨基)-1-苯基丙-1-OL	Benzene and substituted derivatives	苯及其衍生物	Benzene and substituted derivatives	苯及其衍生物	C13H21NO	3	0.655	18259-38-6	12175.6	16256.5	14772.4	4786.71	6726.2	4602.73	1.29869	0.00598652	0.0263853	0.373009	-1.42272	down
pme0321	Kaempferol-7-rhamnoside	山柰酚-7-O-鼠李糖苷	Flavonoids	黄酮	Flavonols	黄酮醇	C21H20O10	3	0.6549	20196-89-8	18799.2	20139.4	21402.7	8605.14	13510.4	4558.93	1.11067	0.0403984	0.104301	0.44206	-1.17768	down
MW0159919	7,8-dimethyl-10-[(2R,3R,4S)-2,3,4,5-tetrahydroxypentyl]-4a,5-dihydrobenzo[g]pteridine-2,4-dione	核黄素 (维生素 B2)	Others	其它类	Vitamin	维生素	C17H20N4O6	3	0.6535	83-88-5	15114.7	8167.14	5246.99	35377.1	25857.7	28418.9	1.2012	0.0075448	0.0315629	3.14256	1.65194	up
MW0000939	3-Nitro-4-piperidino-benzophenone	3-硝基-4-哌啶基-二苯甲酮	Benzene and substituted derivatives	苯及其衍生物	Benzene and substituted derivatives	苯及其衍生物	C18H18N2O3	3	0.6521	56106-97-9	1332.92	3590.35	2509.63	58812.9	61787.7	66668.2	1.33447	0.000697487	0.00730584	25.1946	4.65504	up
MW0106037	beta-N-Methylamino-L-alanine	β-N-甲基氨基-L-丙氨酸	Amino acids and derivatives	氨基酸及其衍生物	Amino acids and derivatives	氨基酸及其衍生物	C4H10N2O2	3	0.6506	15920-93-1 | 741643-07-2	73385.8	56626.1	79295.4	45070.6	26611.5	14946.3	1.11556	0.0234386	0.0703483	0.413882	-1.27271	down
MADP0532	6-Methylthioguanine	6-甲硫鸟嘌呤	Nucleotides and derivatives	核苷酸及其衍生物	Nucleotides and derivatives	核苷酸及其衍生物	C6H7N5S	3	0.6492	1198-47-6	48032.6	51460.5	51655.1	14572.7	10219.2	8678.81	1.32808	0.000132906	0.00290516	0.221443	-2.17499	down
MW0144828	Ala-ile	丙氨酸异亮氨酸	Amino acids and derivatives	氨基酸及其衍生物	Amino acids and derivatives	氨基酸及其衍生物	C9H18N2O3	3	0.6449	29727-65-9	213700	187853	187923	14106.1	16898.6	14692.6	1.35297	0.00206574	0.0131532	0.0775219	-3.68925	down
MW0137107	7-Methoxyflavanone	7-甲氧基黄烷酮	Others	其它类	Ketone compounds	酮类化合物	C16H14O3	3	0.642	21785-09-1	1434.8	692.09	2555.54	13157.5	12637	7054.19	1.24978	0.0330081	0.0897849	7.0153	2.81051	up
MEDN1841	CAY-10550	CAY-10550	Benzene and substituted derivatives	苯及其衍生物	Benzene and substituted derivatives	苯及其衍生物	C15H11N3O3	3	0.6414	34320-83-7	4190.17	5339.03	4642.85	975.89	821.41	2947.97	1.13891	0.0275395	0.0790088	0.334833	-1.57849	down
MW0108024	Lys-Trp-Lys	L-赖氨酸-L-色氨酸-L-赖氨酸	Amino acids and derivatives	氨基酸及其衍生物	Amino acids and derivatives	氨基酸及其衍生物	C23H36N6O4	3	0.6402	38579-27-0	245253	244343	251411	80188.7	98434.9	106246	1.33452	0.00133116	0.0103268	0.384436	-1.37918	down
MW0118724	2-Methyl-3-(pyrimidin-2-YL)propanoic acid	2-甲基-3-嘧啶-2-基-丙酸	Organic acids	有机酸	Organic acids	有机酸	C8H10N2O2	3	0.64	819850-14-1	95051.8	93308.2	82629.1	30163.4	27852.4	32581.1	1.34615	0.00178747	0.0121364	0.334319	-1.5807	down
MW0141958	2,3,3-Triphenylacrylonitrile	2,3,3-三苯基丙烯腈;三苯基氰基乙烯	Heterocyclic compounds	杂环化合物	Heterocyclic compounds	杂环化合物	C21H15N	3	0.6395	6304-33-2 | 7136-23-4	9760.59	7935.96	6270.53	40324.4	49085.2	46693.3	1.33764	0.00188588	0.0125425	5.67875	2.50557	up
MW0137619	Catechin pentaacetate	儿茶素五乙酸酯	Others	其它类	Lactones	内酯类化合物	C25H24O11	3	0.6384	16198-01-9	117216	137176	108114	58830.4	42811.4	56075.6	1.30159	0.0050886	0.0236124	0.435075	-1.20066	down
MW0000172	Cephaeline	头孢烯	Benzene and substituted derivatives	苯及其衍生物	Benzene and substituted derivatives	苯及其衍生物	C28H38N2O4	3	0.6377	483-17-0 | 5483-17-0 | 5853-29-2	303.79	148.64	237.29	101.46	52.67	148.48	1.03371	0.0837229	0.175575	0.438743	-1.18855	down
MEDN0670	O-Desmethylnaproxen	(S)-O-去甲基萘普生	Benzene and substituted derivatives	苯及其衍生物	Benzene and substituted derivatives	苯及其衍生物	C13H12O3	3	0.6356	52079-10-4	156431	160148	134567	63627.2	67303.4	77569.6	1.32665	0.00284695	0.0161925	0.462156	-1.11355	down
MW0160424	MeSPuRMP	MeSPuRMP	Nucleotides and derivatives	核苷酸及其衍生物	Nucleotides and derivatives	核苷酸及其衍生物	C11H15N4O7PS	3	0.6349	7021-52-5	193753	173677	191255	112129	43939.5	59475	1.19238	0.0231434	0.0698862	0.385805	-1.37406	down
MW0010655	Secoisolariciresinol diglucoside	开环异落叶松树脂酚二葡萄糖苷	Lignans and Coumarins	木脂素和香豆素	Lignans	木脂素	C32H46O16	3	0.634	158932-33-3 | 148244-82-0	9805.21	5671.91	11394.2	129954	154171	146665	1.33894	0.00179713	0.0121826	16.0316	4.00285	up
MW0117724	2-(Phenoxymethyl)-1,3-benzothiazole	2-(苯氧基甲基)-1,3-苯并噻唑	Benzene and substituted derivatives	苯及其衍生物	Benzene and substituted derivatives	苯及其衍生物	C14H11NOS	3	0.6329	37859-39-5	6655.66	4115.93	3175.63	56214	48127.5	57829.2	1.33344	0.00157355	0.0113285	11.6275	3.53946	up
MW0055194	N-(1,3-Dihydroxyoctadecan-2-YL)-6-[(7-nitro-2,1,3-benzoxadiazol-4-YL)amino]hexanamide	C-6 NBD-二氢神经酰胺	SL	鞘脂类	Cer	神经酰胺	C30H51N5O6	3	0.632	114301-95-0	8397.86	29743.3	19687	7571.16	4748.27	7330.98	1.04548	0.172593	0.299127	0.339807	-1.55721	down
MW0117339	5-(2-Hydroxyethyl)-1,3-thiazole	5-(2-羟乙基)-1,3-噻唑	Heterocyclic compounds	杂环化合物	Heterocyclic compounds	杂环化合物	C5H7NOS	3	0.6314	5664-55-1	1775.37	678.61	1773.32	15862.4	13265.4	9653.94	1.29484	0.0201201	0.0629151	9.1741	3.19757	up
MEDN1401	5-Phenylpenta-2,4-dienoic acid	5-苯基戊烷-2,4-双酸	Organic acids	有机酸	Organic acids	有机酸	C11H10O2	3	0.6302	1552-94-9 | 28010-12-0 | 185152-35-6 | 38446-98-9	20532.3	18707.3	20022.5	3180.98	2456.05	2383.48	1.34889	0.000142345	0.00303405	0.13534	-2.88534	down
MW0007892	Urea, 1-(1-naphthyl)-3-phenyl-2-thio-	脲，1-(1-萘基)-3-苯基-2-硫代-	Benzene and substituted derivatives	苯及其衍生物	Benzene and substituted derivatives	苯及其衍生物	C17H14N2S	3	0.6283	24775-57-3	51.79	2298.55	1636.82	13142.2	9804.63	13177.6	1.05672	0.0027382	0.0157253	9.0602	3.17954	up
MEDP1307	(2S,3S)-2-amino-3-phenylbutanoic acid	(2S,3S)-3-甲基苯丙氨酸	Amino acids and derivatives	氨基酸及其衍生物	Amino acids and derivatives	氨基酸及其衍生物	C10H13NO2	3	0.6283	25488-25-9	20970.7	21667.1	18062.4	47163	44432.8	48642.7	1.34035	9.63602e-05	0.00251072	2.31034	1.20811	up
MW0136735	6-Methoxyflavanone	6-甲氧基黄烷酮	Others	其它类	Ketone compounds	酮类化合物	C16H14O3	3	0.6282	3034-04-6	229002	243956	245838	595145	597002	773626	1.33359	0.0190042	0.0604139	2.73481	1.45144	up
MW0114601	Humulone	律草酮	Others	其它类	Others	其它	C21H30O5	3	0.628	26472-41-3	9877.65	2102.38	440.57	27720.2	23421	26800	1.10184	0.00813055	0.0332851	6.27515	2.64965	up
MW0004515	4-[(Z)-(4-oxo-2-thioxo-1,3-thiazolidin-5-ylidene)methyl]benzoic acid	4-[(Z)-(4-oxo-2-thioxo-1,3-thiazolidin-5-ylidene)methyl]苯甲酸	Benzene and substituted derivatives	苯及其衍生物	Benzene and substituted derivatives	苯及其衍生物	C11H7NO3S2	3	0.6267	103987-82-2	160.36	112.95	187.11	3373.28	3451.85	3363.66	1.34874	1.88638e-07	0.000266836	22.1293	4.46789	up
MW0121749	6-(4-methoxyphenyl)-2-thioxo-2,3-dihydropyrimidin-4(1H)-one	6-(4-甲氧基苯基)-2-thioxo-2,3-dihydropyrimidin-4(1H)-one	Others	其它类	Ketone compounds	酮类化合物	C11H10N2O2S	3	0.6251	33166-87-9	1091.68	290.7	439.57	1733.85	1530.57	1285.22	1.08254	0.046067	0.114132	2.49713	1.32027	up
MW0002836	2-Carbamoyl-3-nitrobenzoic acid	2-氨基甲酰基-3-硝基苯甲酸	Benzene and substituted derivatives	苯及其衍生物	Benzene and substituted derivatives	苯及其衍生物	C8H6N2O5	3	0.6237	77326-45-5	893.68	1242.21	1870.4	5045.17	2396.75	2534.25	1.10234	0.136362	0.251129	2.49013	1.31622	up
MW0000246	Ergocornine	麦角碱	Alkaloids	生物碱	Alkaloids	生物碱	C31H39N5O5	3	0.6231	564-36-3	60444.5	56477.4	59198.6	27831.1	29726.4	25440.1	1.34347	5.49212e-05	0.00204024	0.471255	-1.08542	down
MW0104210	11-Dehydro-2,3-dinor-txb2	11-脱氢-2,3-二恶烷B2	Organic acids	有机酸	Organic acids	有机酸	C18H28O6	3	0.6213	79250-60-5	68196.1	73688.5	73259.2	266245	298169	314674	1.35085	0.00366189	0.0188637	4.08605	2.03071	up
MW0107061	H-Gly-Gly-Glu-OH	Gly Gly Glu	Amino acids and derivatives	氨基酸及其衍生物	Amino acids and derivatives	氨基酸及其衍生物	C9H15N3O6	3	0.619	17343-05-4	98905.2	94948.1	102864	36824.2	21282.1	24730	1.3135	0.00103439	0.00905193	0.279175	-1.84076	down
MW0111656	1,2,3-Propanetriol, 1-(5-methyl-3-furanyl)-	1,2,3-丙三醇，1-(5-methyl-3-furanyl)-	Heterocyclic compounds	杂环化合物	Heterocyclic compounds	杂环化合物	C8H12O4	3	0.6185	33597-67-0	602.8	716.31	404.79	923.31	2008.6	4844.67	1.07184	0.225954	0.361093	4.51104	2.17346	up
MW0004658	4-amino-N-[2,6-bis(methylamino)pyrimidin-4-yl]benzenesulfonamide	4-氨基-N-[2,6-双(甲氨基)嘧啶-4-基]苯磺酰胺	Benzene and substituted derivatives	苯及其衍生物	Benzene and substituted derivatives	苯及其衍生物	C12H16N6O2S	3	0.6178	202466-68-0	3601.63	4590.91	1882	1191.45	458.92	1047.21	1.16165	0.0802426	0.170392	0.267762	-1.90098	down
MW0007080	Ethyl 4-hydroxy-3,5-dimethoxybenzoate	丁香酸乙酯	Benzene and substituted derivatives	苯及其衍生物	Benzene and substituted derivatives	苯及其衍生物	C11H14O5	3	0.6177	3943-80-4	19904	35277.9	40476.1	69406.7	77768.6	67867.8	1.20289	0.0110028	0.0412036	2.24804	1.16867	up
MW0006702	Damascenine	大马色宁	Benzene and substituted derivatives	苯及其衍生物	Benzene and substituted derivatives	苯及其衍生物	C10H13NO3	3	0.6166	483-64-7	76291	71065.6	63438.8	23884.9	24424.3	25584.6	1.34695	0.00589998	0.0262011	0.350548	-1.51232	down
ZINC85487129	Agrimol F	仙鹤草酚 F	Phenolic acids	酚酸类	Phenolic acids	酚酸类	C34H40O12	3	0.6165	121693-16-1	236913	245567	201734	13256.6	26361.6	62217.7	1.24457	0.000635387	0.00687296	0.148836	-2.7482	down
MW0142271	Pyrimidine-2-carboxylic acid	嘧啶-2-羧酸	Nucleotides and derivatives	核苷酸及其衍生物	Nucleotides and derivatives	核苷酸及其衍生物	C5H4N2O2	3	0.6134	31519-62-7 | 27457-25-6	253.64	43.34	25.12	16172.8	15492.6	16277.2	1.31307	7.83166e-05	0.00227316	148.844	7.21766	up
MW0152043	Kolaflavanone	科拉夫瓦诺内	Others	其它类	Ketone compounds	酮类化合物	C31H24O12	3	0.6134	68705-66-8 | 97560-11-7	88498.6	88735.9	82500.5	26503.1	29980.1	35037.7	1.33784	8.14012e-05	0.0023069	0.352362	-1.50487	down
MW0008894	1H-Tetrazol-5-amine, 1-methyl-N-(phenylmethyl)-	1H-四唑-5-胺，1-甲基-N-(苯基甲基)-	Benzene and substituted derivatives	苯及其衍生物	Benzene and substituted derivatives	苯及其衍生物	C9H11N5	3	0.6133	66907-74-2	6658.09	6202.87	7153.28	788.8	974.97	1732.31	1.30976	0.000161055	0.0032542	0.17468	-2.51722	down
MW0103862	NCGC00380616-01_C28H39NO7_Spiro[2H-furo[2,3-e]isoindole-2,1'(2'H)-naphthalene]-7(3H)-acetic acid, 3',4',4'a,5',6,6',7',8,8',8'a-decahydro-4,6',7'-trihydroxy-2',5',5',8'a-tetramethyl-alpha-(1-methylethyl)-6-oxo-, (alphaS,2R,2'R,6'S,7'R,8'aS)-	NCGC00380616-01_C28H39NO7_Spiro[2H-furo[2,3-e]isoindole-2,1'(2'H)-naphthalene]-7(3H)-acetic acid, 3',4',4'a,5',6,6',7',8,8',8'a-decahydro-4,6',7'-trihydroxy-2',5',5',8'a-tetramethyl-alpha-(1-methylethyl)-6-oxo-, (alphaS,2R,2'R,6'S,7'R,8'aS)-	Organic acids	有机酸	Organic acids	有机酸	C28H39NO7	3	0.6081	685141-56-4	5182.68	6151.31	4488.32	47354.5	50079.2	45944.6	1.35005	0.00017382	0.00339341	9.06178	3.1798	up
MW0116253	N-1,3-benzoxazol-2-ylguanidine	N-苯并恶唑-2-基胍	Benzene and substituted derivatives	苯及其衍生物	Benzene and substituted derivatives	苯及其衍生物	C8H8N4O	3	0.6081	39123-82-5	73798.8	65476.9	64399.5	134577	129018	143932	1.33901	0.000427189	0.00548845	2.00087	1.00062	up
MW0152737	Lobelanine	山梗菜酮硷	Alkaloids	生物碱	Alkaloids	生物碱	C22H25NO2	3	0.606	579-21-5	507.81	51.88	813.32	12884.8	14251.9	14641.7	1.2424	0.000365274	0.00499926	30.4283	4.92734	up
MW0148888	Emindole Sb	艾明多锑	Alkaloids	生物碱	Plumerane	吲哚类生物碱	C28H39NO	3	0.6024	112900-04-6	3581.51	3976.15	8134.25	16609.8	15686.5	12959.4	1.22291	0.00698126	0.0297	2.88402	1.52808	up
MW0116332	1-(2-Furoyl)-1H-benzotriazole	1-(2-Furoyl)-1H-苯并三唑	Benzene and substituted derivatives	苯及其衍生物	Benzene and substituted derivatives	苯及其衍生物	C11H7N3O2	3	0.6012	144223-33-6	509.56	143.52	580.7	2024.05	933.25	1319.13	1.09134	0.0698119	0.154055	3.46612	1.79332	up
MW0106630	Ethyl [(3-cyano-4,5-dimethylthiophen-2-yl)amino](oxo)acetate	[(3-氰基-4,5-二甲基噻吩-2-基)氨基](氧代)乙酸乙酯	Others	其它类	Lactones	内酯类化合物	C11H12N2O3S	3	0.5996	57785-66-7	1131.06	2061.77	1081.59	7413.79	6325.14	4839.55	1.28944	0.0130239	0.0461245	4.34643	2.11983	up
MW0003371	(5R)-5-[(E,3S)-3-hydroxy-4-phenylbut-1-enyl]-1-[6-(2H-tetrazol-5-yl)hexyl]pyrrolidin-2-one	(5R)-5-[(E,3S)-3-hydroxy-4-phenylbut-1-enyl]-1-[6-(2H-tetrazol-5-yl)hexyl]pyrrolidin-2-one	Benzene and substituted derivatives	苯及其衍生物	Benzene and substituted derivatives	苯及其衍生物	C21H29N5O2	3	0.5991	346673-06-1	13023.5	8879.86	15168	32995.7	30942.5	27534.2	1.27353	0.00189506	0.0125607	2.46747	1.30303	up
MW0106415	Didecyl hydrogen phosphate	磷酸氢二癸酯	Organic acids	有机酸	Organic acids	有机酸	C20H43O4P	3	0.5981	7795-87-1	1220.22	69.95	532.56	2661.08	2975.14	2804.57	1.04534	0.0167317	0.0555815	4.63085	2.21128	up
MW0104334	N-(3-Carboxy-1-oxopropyl)-DL-methionine	N-(3-Carboxy-1-oxopropyl)-DL-蛋氨酸	Organic acids	有机酸	Organic acids	有机酸	C9H15NO5S	3	0.5977	78306-53-3 | 7251-64-1	434166	275287	429837	95472.3	4777.63	5481.59	1.16376	0.00893282	0.035649	0.0928048	-3.42966	down
MW0063241	Pyripyropene A	吡唑啉 A	Terpenoids	萜类	Sesquiterpenoids	倍半萜	C31H37NO10	3	0.5972	147444-03-9	1398.21	1185.18	864.51	8569.39	27915.1	27522.3	1.29927	0.0870574	0.18076	18.564	4.21443	up
MW0107101	L-Lysine, glycyl-L-valyl-	L-赖氨酸、甘氨酰-L-缬氨酰-	Amino acids and derivatives	氨基酸及其衍生物	Amino acids and derivatives	氨基酸及其衍生物	C13H26N4O4	3	0.5956	71227-72-0	17989.3	17868.4	20506.6	6143.95	4829.96	6150.36	1.33922	0.000905948	0.0084257	0.303814	-1.71874	down
MW0146927	Butroxydim	丁羟胺	Benzene and substituted derivatives	苯及其衍生物	Benzene and substituted derivatives	苯及其衍生物	C24H33NO4	3	0.5954	138164-12-2	10414.5	9751.18	8558.52	28896.5	31811.1	33244.7	1.34529	0.00100213	0.00887935	3.27083	1.70966	up
MW0151707	Iminoacetic acid	亚氨基乙酸	Organic acids	有机酸	Organic acids	有机酸	C2H3NO2	3	0.5927	4472-12-2	8285.17	9357.61	9377.29	3083.82	2998.09	2046.39	1.32104	0.000220953	0.00386134	0.300825	-1.73301	down
MW0111080	2-[6-(2-Hydroxy-2-phenylethyl)-1-methyl-2-piperidyl]-1-phenylethanol	2-[6-(2-羟基-2-苯乙基)-1-甲基-2-哌啶基]-1-苯乙醇	Benzene and substituted derivatives	苯及其衍生物	Benzene and substituted derivatives	苯及其衍生物	C22H29NO2	3	0.5922	552-72-7	143414	168556	145450	497638	558573	563756	1.34785	0.00103804	0.00907027	3.54153	1.82437	up
MW0152754	Lonchocarpenin	龙胆苦素	Heterocyclic compounds	杂环化合物	Heterocyclic compounds	杂环化合物	C27H28O6	3	0.5917	22263-56-5	4305.39	1154.87	1263.4	10970.7	11538.8	3131.41	1.02124	0.133198	0.247194	3.81354	1.93113	up
MW0168473	2',3',5'-triacetyl-5-Azacytidine	2',3',5'-三乙酰-5-氮杂胞苷	Others	其它类	Others	其它	C14H18N4O8	3	0.5917	10302-78-0	304305	305038	308967	90753.7	79551.6	95840.2	1.34962	0.000177825	0.00341014	0.289821	-1.78677	down
MW0150668	Guibourtinidol-(4alpha->6)-catechin	Guibourtinidol-(4ALPHA->6)-儿茶素	Flavonoids	黄酮	Flavones	黄酮	C30H26O10	3	0.5911	26277-74-7	129972	121310	99705.9	64323.7	36108.3	51209.8	1.24432	0.00557994	0.0251562	0.432043	-1.21075	down
MW0140674	(S)-autumnaline	（S)-秋草碱；秋水仙碱	Alkaloids	生物碱	Isoquinoline alkaloids	异喹啉类生物碱	C21H27NO5	3	0.5904	23068-65-7	7598.01	2787.46	6739.88	14664.8	17435.7	18200.4	1.18379	0.00506388	0.0235313	2.93722	1.55445	up
MW0154029	Myricoside	Myricoside	Benzene and substituted derivatives	苯及其衍生物	Benzene and substituted derivatives	苯及其衍生物	C34H44O19	3	0.5892	76076-04-5	170181	150409	198206	358246	360780	389763	1.32323	0.000535479	0.00620526	2.13723	1.09574	up
MW0126431	Resorcinolnaphthalein	间苯二酚萘	Heterocyclic compounds	杂环化合物	Heterocyclic compounds	杂环化合物	C24H14O5	3	0.5884	41307-63-5	1317.14	968.53	1161.43	3059.42	1428.9	2951.98	1.0935	0.122556	0.232081	2.15842	1.10998	up
MW0003531	n-[3-(Cyclohexylamino)-4-methoxyphenyl]acetamide	n-[3-(环己基氨基)-4-甲氧基苯基]乙酰胺	Benzene and substituted derivatives	苯及其衍生物	Benzene and substituted derivatives	苯及其衍生物	C15H22N2O2	3	0.5882	29633-64-5	6251.91	10264.9	1609.86	43856.4	15143.1	40550.1	1.1087	0.0866984	0.18029	5.49189	2.4573	up
MW0116937	1-ethyl-1H-tetrazol-5-amine	1-乙基-1H-四唑-5-胺	Heterocyclic compounds	杂环化合物	Heterocyclic compounds	杂环化合物	C3H7N5	3	0.5875	65258-53-9	23067	21845.3	15931.9	116480	97469.7	126963	1.33762	0.00582153	0.0259752	5.60304	2.48621	up
MW0006013	Altersolanol A	Altersolanol?A	Benzene and substituted derivatives	苯及其衍生物	Benzene and substituted derivatives	苯及其衍生物	C16H16O8	3	0.5846	22268-16-2	284.88	192.87	279.04	36.57	150.8	83.63	1.09093	0.0224844	0.0684323	0.358091	-1.4816	down
MW0118609	2-Hydroxy-5-sulfonicotinic acid	2-Hydroxy-5-sulfonicotinic acid	Organic acids	有机酸	Organic acids	有机酸	C6H5NO6S	3	0.5834	334708-05-3	146.46	39.06	62.29	385.81	719.36	247.08	1.17913	0.112753	0.218612	5.4568	2.44806	up
MW0000510	Ethyl(1-phenylbutan-2-yl)amine	乙基(1-苯基丁-2-基)胺	Benzene and substituted derivatives	苯及其衍生物	Benzene and substituted derivatives	苯及其衍生物	C12H19N	3	0.5831	119486-07-6	4431.07	4573.33	3889.97	1572.97	1615.04	1775.09	1.34382	0.00356562	0.0185441	0.384904	-1.37743	down
MW0009767	Streptovaricinal C	链霉素C	Others	其它类	Lactones	内酯类化合物	C40H49NO14	3	0.5815	54955-14-5	50356.9	19588	21914.3	99543.2	43180.7	124751	1.04675	0.121847	0.231008	2.91179	1.54191	up
MW0110253	Tyr-Gly	酪氨酸-甘氨酸	Amino acids and derivatives	氨基酸及其衍生物	Amino acids and derivatives	氨基酸及其衍生物	C11H14N2O4	3	0.5804	673-08-5	303923	292643	561015	101135	98197.9	101851	1.28846	0.0826978	0.17414	0.260183	-1.9424	down
MW0111704	1,3-Dimethyl-1H-pyrazole-4-carbaldehyde	1,3-二甲基-1H-吡唑-4-甲醛	Heterocyclic compounds	杂环化合物	Heterocyclic compounds	杂环化合物	C6H8N2O	3	0.5795	25016-12-0	198104	220327	183106	459879	584649	949760	1.26619	0.0865201	0.180047	3.31532	1.72915	up
MW0143757	6-Acetylpicropolin	6-乙酰基苦酚	Amino acids and derivatives	氨基酸及其衍生物	Amino acids and derivatives	氨基酸及其衍生物	C24H28O9	3	0.5783	116187-56-5 | 28393-25-1	171138	171066	153460	456989	498475	478240	1.3503	0.000208012	0.00372531	2.8925	1.53232	up
MW0114960	N-acetyl-alpha-D-glucosamine 1-phosphate	N-乙酰基-α-D-葡糖胺1-磷酸	Organic acids	有机酸	Organic acids	有机酸	C8H16NO9P	3	0.577	119185-04-5 | 119185-08-9 | 25249-56-3	8325.57	6760.24	3651.71	257.91	2685.71	924.83	1.08398	0.0489048	0.119075	0.206455	-2.2761	down
MW0157019	Serpentine	蛇根碱	Alkaloids	生物碱	Plumerane	吲哚类生物碱	C21H20N2O3	3	0.5766	18786-24-8	68032.2	66048.7	62136.8	25064.6	22686.1	33876	1.30592	0.00221747	0.0137293	0.416001	-1.26534	down
FDATN00765	Sulisobenzone	舒异苯宗	Benzene and substituted derivatives	苯及其衍生物	Benzene and substituted derivatives	苯及其衍生物	C14H12O6S	3	0.5759	4065-45-6	747992	431796	711258	150391	101673	152066	1.30263	0.0352416	0.0942991	0.213707	-2.22629	down
MW0119990	4-Piperazin-1-yl-quinoline	4-哌嗪-1-基喹啉	Heterocyclic compounds	杂环化合物	Heterocyclic compounds	杂环化合物	C13H15N3	3	0.5689	118306-89-1	14621.5	12499.5	12197.4	47466.7	39916.9	73151.5	1.30648	0.0559777	0.13095	4.08295	2.02961	up
MW0105592	alpha-Amanitine	鹅膏毒素	Heterocyclic compounds	杂环化合物	Heterocyclic compounds	杂环化合物	C39H54N10O14S	3	0.5689	23109-05-9	2929.29	9497.86	3333.05	61838.2	66640.8	78154.7	1.30538	0.00187249	0.0125165	13.1111	3.71272	up
MW0009486	Platencin	铂金素	Benzene and substituted derivatives	苯及其衍生物	Benzene and substituted derivatives	苯及其衍生物	C24H27NO6	3	0.5684	869898-86-2	5150.63	1377.22	2667.71	7813.51	12649.8	16353.2	1.1661	0.0478865	0.117298	4.00373	2.00134	up
MW0149605	Glepidotin C	皂荚苷C	Flavonoids	黄酮	Flavones	黄酮	C19H22O3	3	0.5575	126026-25-3	5495.31	5201.38	6892.47	19802.8	18944.6	18487.5	1.34019	6.38931e-05	0.00212651	3.25398	1.70221	up
MEDP1101	Methyl (R)-(-)-3-hydroxybutyrate	3-羟基丁酸甲酯	Organic acids	有机酸	Organic acids	有机酸	C5H10O3	3	0.553	3976-69-0	7576.41	9479.06	10171	27001.5	26388.2	27215.7	1.3374	0.000799355	0.00776772	2.96055	1.56587	up
MW0116923	1-Cyclohexylpiperazine	1-环己基哌嗪	Heterocyclic compounds	杂环化合物	Heterocyclic compounds	杂环化合物	C10H20N2	3	0.5504	17766-28-8	9329.72	2289.89	8877.02	21390	23620	23834.5	1.12684	0.0122216	0.0443118	3.35882	1.74795	up
MW0001234	1-(4-Methylphenyl)-1-cyclopropanecarbonitrile	1-(4-甲基苯基)-1-环丙腈	Benzene and substituted derivatives	苯及其衍生物	Benzene and substituted derivatives	苯及其衍生物	C11H11N	3	0.5477	71172-78-6	31893.9	49878.5	36905.5	223695	211579	216873	1.33928	3.54129e-05	0.00167509	5.49511	2.45815	up
MW0121592	5-Methoxy-dl-tryptophan	5-甲氧基-DL-色氨酸	Amino acids and derivatives	氨基酸及其衍生物	Amino acids and derivatives	氨基酸及其衍生物	C12H14N2O3	3	0.5438	28052-84-8	3337.5	2924.5	4091.7	9551.03	13751.2	13342	1.31715	0.0175157	0.0572312	3.53924	1.82344	up
MW0119015	3-(3-Nitrophenyl)-5-(2-phenylethyl)-1,2,4-oxadiazole	3-(3-硝基苯基)-5-(2-苯乙基)-1,2,4-恶二唑	Heterocyclic compounds	杂环化合物	Heterocyclic compounds	杂环化合物	C16H13N3O3	3	0.5418	6136-89-6 | 425374-47-6	16916.1	19337.4	14018.2	2060.78	5785.14	3680.54	1.25617	0.0034692	0.0182766	0.229283	-2.1248	down
MW0006810	Diethyl 2-[(2-methoxyanilino)methylene]malonate	2-[(2-甲氧基苯胺基)亚甲基]丙二酸二乙酯	Phenolic acids	酚酸类	Phenolic acids	酚酸类	C15H19NO5	3	0.5287	104007-09-2	666.15	986.42	1971.05	4984.16	3089.02	2492.4	1.12682	0.0714894	0.157223	2.91575	1.54387	up
MW0002448	2-[(2-Ethylbutanoyl)amino]-4,5-dimethoxybenzoic acid	2-[(2-乙基丁酰基)氨基]-4,5-二甲氧基苯甲酸	Benzene and substituted derivatives	苯及其衍生物	Benzene and substituted derivatives	苯及其衍生物	C15H21NO5	3	0.5167	378202-24-5	2197.55	5660.75	2274	13200.7	16097	14376.5	1.25666	0.00197111	0.0128198	4.31039	2.10782	up
MW0148149	Dansyl-Tyr-Val-Gly	Dansyl-Tyr-Val-Gly	Amino acids and derivatives	氨基酸及其衍生物	Amino acids and derivatives	氨基酸及其衍生物	C28H34N4O7S	3	0.5164	113527-49-4	37615.9	16613.1	25168.8	119316	69460.9	94490.4	1.2421	0.0278871	0.0797598	3.56769	1.83499	up
MW0000632	(2-Methylbenzyl)(pyridin-4-ylmethyl)amine	(2-甲基苄基)(吡啶-4-基甲基)胺	Benzene and substituted derivatives	苯及其衍生物	Benzene and substituted derivatives	苯及其衍生物	C14H16N2	3	0.5062	880809-54-1	218.37	175.27	152.05	820.57	1161.22	817.38	1.33052	0.0198605	0.0624036	5.1296	2.35885	up
MW0014741	(5S)-5-Carboxystrictosidine	(5S)-5-羧缩丝氨酸	Organic acids	有机酸	Organic acids	有机酸	C28H34N2O11	3	0.5048	34371-47-6	122361	66899.5	171543	320777	376266	528387	1.21614	0.0267581	0.0775714	3.39639	1.764	up
MW0112943	Thalictricoside	松香甙	Benzene and substituted derivatives	苯及其衍生物	Benzene and substituted derivatives	苯及其衍生物	C19H27NO12	3	0.5018	649758-25-8	77.39	133.49	85.83	501.55	272.7	133.98	1.04533	0.194837	0.326285	3.061	1.614	up
MW0109147	Phe-Val-Phe	苯丙氨酰-缬氨酰-苯丙氨酸	Amino acids and derivatives	氨基酸及其衍生物	Amino acids and derivatives	氨基酸及其衍生物	C23H29N3O4	2	0.9276	-	240414	226029	236975	551487	623281	598437	1.34977	0.00251585	0.0149913	2.52084	1.3339	up
MW0136684	Dihydrorobustic acid	二氢丁酸	Organic acids	有机酸	Organic acids	有机酸	C22H22O6	2	0.9276	-	51830.7	61767.4	53250	14757	14661.4	17686	1.34363	0.0031766	0.0173831	0.282319	-1.8246	down
MW0105789	Asn-Phe-Arg	L-天冬酰胺-L-苯丙氨酰-L-精氨酸	Amino acids and derivatives	氨基酸及其衍生物	Amino acids and derivatives	氨基酸及其衍生物	C19H29N7O5	2	0.9039	-	136411	75442	123141	645535	390484	432629	1.28971	0.0351601	0.0941416	4.38411	2.13228	up
MW0145316	Arg-Cys-Ser	L-精氨酰-L-半胱氨酰-L-丝氨酸	Amino acids and derivatives	氨基酸及其衍生物	Amino acids and derivatives	氨基酸及其衍生物	C12H24N6O5S1	2	0.9027	-	286750	310193	292672	1.2058e+06	1.26226e+06	1.35938e+06	1.35273	0.0016903	0.0117651	4.30235	2.10512	up
MW0155216	Phe-His-Trp	苯丙氨酰-组氨酰-色氨酸	Amino acids and derivatives	氨基酸及其衍生物	Amino acids and derivatives	氨基酸及其衍生物	C26H28N6O4	2	0.9019	-	20970.6	29392.4	50740.5	3748.22	13747.1	13223.7	1.06707	0.104556	0.207104	0.303837	-1.71863	down
MW0144760	Ala-Trp-Glu	L-丙氨酰-L-色氨酸-L-谷氨酸	Amino acids and derivatives	氨基酸及其衍生物	Amino acids and derivatives	氨基酸及其衍生物	C19H24N4O6	2	0.8963	-	61815.9	48076.9	50183.9	250483	363605	263726	1.33677	0.0203231	0.0633467	5.4837	2.45515	up
MW0153644	Met-Pro-Gln	甲硫氨酰-脯氨酰-谷氨酰胺	Amino acids and derivatives	氨基酸及其衍生物	Amino acids and derivatives	氨基酸及其衍生物	C15H26N4O5S1	2	0.8951	-	142283	2261.65	49540.1	604316	732736	788072	1.08472	0.000986906	0.00886448	10.9495	3.45279	up
MW0158426	Tyr-Cys-Thr	酪氨酸-半胱氨酸-苏氨酸	Amino acids and derivatives	氨基酸及其衍生物	Amino acids and derivatives	氨基酸及其衍生物	C16H23N3O6S1	2	0.8922	-	38730.5	35771.2	34564.8	87474	122983	128449	1.32192	0.0260627	0.0762528	3.10733	1.63568	up
MW0153788	Methyl 10-gingerol	甲基- 10-姜酚	Others	其它类	Lactones	内酯类化合物	C22H36O4	2	0.8877	-	8274.68	14644.7	9484.45	24871.7	19500.3	21171.8	1.20702	0.0129118	0.0459439	2.02272	1.01629	up
MW0148015	Cys-His-Leu	半胱氨酸-组氨酸-亮氨酸	Amino acids and derivatives	氨基酸及其衍生物	Amino acids and derivatives	氨基酸及其衍生物	C15H25N5O4S1	2	0.8758	-	7219.09	7806.56	7904.87	50467.7	66578.5	69407.6	1.34834	0.0114278	0.0422521	8.13125	3.02348	up
MW0108726	N-[(3S)-2-Oxooxolan-3-yl]hexadec-9-enamide	N-[(3S)-2-Oxooxolan-3-yl]hexadec-9-enamide	Amino acids and derivatives	氨基酸及其衍生物	Amino acids and derivatives	氨基酸及其衍生物	C20H35NO3	2	0.8755	-	777228	198817	247691	71231.3	140560	102288	1.07296	0.242288	0.379125	0.256656	-1.96209	down
MW0153514	Met-Asp-Glu	L-蛋氨酸-L-天冬氨酸-L-谷氨酸	Amino acids and derivatives	氨基酸及其衍生物	Amino acids and derivatives	氨基酸及其衍生物	C14H23N3O8S1	2	0.8745	-	132082	109594	98514.1	45664.4	51080.2	47133.8	1.32477	0.0197714	0.0621839	0.422935	-1.24149	down
MW0151077	His-Ser-Gly	L-组氨酸-L-丝氨酸-甘氨酸	Amino acids and derivatives	氨基酸及其衍生物	Amino acids and derivatives	氨基酸及其衍生物	C11H17N5O5	2	0.874	-	19178.8	22335	8294.71	59877.8	64845.1	77506.6	1.24515	0.00197395	0.0128198	4.06014	2.02153	up
MW0146294	Asp-Tyr-Asn	L-天冬氨酰-L-酪氨酰-L-天冬酰胺	Amino acids and derivatives	氨基酸及其衍生物	Amino acids and derivatives	氨基酸及其衍生物	C17H22N4O8	2	0.8723	-	7133.16	5914.22	5989.72	57183.1	44793.7	53361.8	1.34938	0.00597268	0.0263572	8.15979	3.02853	up
MW0158251	Trp-Thr-Glu	色氨酸-苏氨酸-谷氨酸	Amino acids and derivatives	氨基酸及其衍生物	Amino acids and derivatives	氨基酸及其衍生物	C20H26N4O7	2	0.8723	-	85181.2	81431.6	77743.9	158276	157773	175643	1.34423	0.00215122	0.0134861	2.01219	1.00877	up
MW0054336	alpha-L-Fucp-(1->3)-[beta-D-Galp-(1->4)]-D-GlcpNAc	alpha-L-Fucp-(1->3)-[beta-D-Galp-(1->4)]-D-GlcpNAc	Others	其它类	Saccharides	糖类	C20H35NO15	2	0.868	-	21053.9	36733.4	27744.2	47928.6	91248.3	88314.2	1.18874	0.0655086	0.14736	2.65973	1.41128	up
MW0145308	Arg-Cys-Asn	L-精氨酰-L-半胱氨酰-L-天冬酰胺	Amino acids and derivatives	氨基酸及其衍生物	Amino acids and derivatives	氨基酸及其衍生物	C13H25N7O5S1	2	0.8654	-	32004.8	34578.3	42979.6	182944	165132	172514	1.34553	8.16151e-05	0.0023069	4.75152	2.24839	up
MW0157594	Thr-Asp-Trp	苏氨酸-天冬氨酸-色氨酸	Amino acids and derivatives	氨基酸及其衍生物	Amino acids and derivatives	氨基酸及其衍生物	C19H24N4O7	2	0.8639	-	98983.2	86610.5	85646.7	240362	365859	246276	1.31296	0.0404369	0.104318	3.14296	1.65212	up
MW0151081	His-Ser-Leu	L-组氨酸-L-丝氨酸-L-亮氨酸	Amino acids and derivatives	氨基酸及其衍生物	Amino acids and derivatives	氨基酸及其衍生物	C15H25N5O5	2	0.8555	-	21979.3	19717.9	18399	66106.2	71695.6	80062.7	1.34556	0.00385316	0.0195595	3.62526	1.85809	up
MW0158451	Tyr-Glu-Asp	酪氨酸-谷氨酸-天冬氨酸	Amino acids and derivatives	氨基酸及其衍生物	Amino acids and derivatives	氨基酸及其衍生物	C18H23N3O9	2	0.855	-	6892.83	8058.8	8232.98	27617.1	41792.7	28487.1	1.32811	0.0313859	0.0868624	4.2225	2.0781	up
MW0158210	Trp-Met-Trp	色氨酸-甲硫氨酸-色氨酸	Amino acids and derivatives	氨基酸及其衍生物	Amino acids and derivatives	氨基酸及其衍生物	C27H31N5O4S1	2	0.8521	-	22155.1	42408.1	21338	65607.4	71740.1	59747.6	1.2022	0.0178311	0.0578733	2.29444	1.19814	up
MW0146090	Asp-Gln-Tyr	L-天冬氨酰-L-谷氨酰胺-L-酪氨酸	Amino acids and derivatives	氨基酸及其衍生物	Amino acids and derivatives	氨基酸及其衍生物	C18H24N4O8	2	0.8519	-	23693.8	9736.04	17505.1	163477	176094	179776	1.32305	2.2771e-05	0.00139655	10.1963	3.34997	up
MW0158206	Trp-Met-His	色氨酸-甲硫氨酸-组氨酸	Amino acids and derivatives	氨基酸及其衍生物	Amino acids and derivatives	氨基酸及其衍生物	C22H28N6O4S1	2	0.8519	-	135997	109654	123718	49959.2	39755.7	57586.3	1.30872	0.00218257	0.0135909	0.398791	-1.32629	down
MW0145465	Arg-Phe-Leu	L-精氨酰-L-苯丙氨酰-L-亮氨酸	Amino acids and derivatives	氨基酸及其衍生物	Amino acids and derivatives	氨基酸及其衍生物	C21H34N6O4	2	0.8489	-	278770	400889	457438	108975	187679	208525	1.15976	0.0367997	0.0973956	0.444272	-1.17049	down
MW0158649	Tyr-Tyr-Glu	酪氨酸-酪氨酸-谷氨酸	Amino acids and derivatives	氨基酸及其衍生物	Amino acids and derivatives	氨基酸及其衍生物	C23H27N3O8	2	0.8481	-	36289.2	34248.7	35880.8	161181	177541	156457	1.35294	0.00223479	0.0137971	4.65313	2.2182	up
MW0153503	Met-Asn-Asp	L-蛋氨酸-L-天冬酰胺-L-天冬氨酸	Amino acids and derivatives	氨基酸及其衍生物	Amino acids and derivatives	氨基酸及其衍生物	C13H22N4O7S1	2	0.8423	-	29308.2	26994	32461.9	180687	187063	205920	1.35156	0.00151223	0.0110835	6.46286	2.69217	up
MW0153668	Met-Ser-Tyr	甲硫氨酰-丝氨酰-酪氨酸	Amino acids and derivatives	氨基酸及其衍生物	Amino acids and derivatives	氨基酸及其衍生物	C17H25N3O6S1	2	0.8404	-	49357.5	46077.5	43576.8	261978	296769	347287	1.3488	0.00901155	0.035851	6.51768	2.70436	up
MW0153487	Met-Ala-Leu	L-蛋氨酸-L-丙氨酸-L-亮氨酸	Amino acids and derivatives	氨基酸及其衍生物	Amino acids and derivatives	氨基酸及其衍生物	C14H27N3O4S1	2	0.8388	-	1068.8	698.44	8165.07	29482	17919.6	49127.8	1.17039	0.0780976	0.166905	9.71873	3.28077	up
MW0153015	Lys-Ile-Met	L-赖氨酸-L-异亮氨酸-L-蛋氨酸	Amino acids and derivatives	氨基酸及其衍生物	Amino acids and derivatives	氨基酸及其衍生物	C17H34N4O4S1	2	0.8344	-	64439.1	66486.1	75968.2	193023	196871	205735	1.34807	1.55367e-05	0.0012579	2.87892	1.52553	up
MW0151034	His-Met-Val	组氨酸-蛋氨酸-缬氨酸	Amino acids and derivatives	氨基酸及其衍生物	Amino acids and derivatives	氨基酸及其衍生物	C16H27N5O4S1	2	0.8343	-	28556.1	21594.6	32613.7	113273	122659	118361	1.33609	3.45326e-05	0.00167509	4.28074	2.09786	up
MW0149772	Gln-Phe-Asp	谷酰氨-苯丙氨酸-天门冬氨酸	Amino acids and derivatives	氨基酸及其衍生物	Amino acids and derivatives	氨基酸及其衍生物	C18H24N4O7	2	0.8334	-	17446.3	21048.5	13529.5	56948.7	63046.2	60859.1	1.32645	0.000136247	0.00295247	3.47634	1.79757	up
MW0158558	Tyr-Met-Thr	酪氨酸-甲硫氨酸--苏氨酸	Amino acids and derivatives	氨基酸及其衍生物	Amino acids and derivatives	氨基酸及其衍生物	C18H27N3O6S1	2	0.8331	-	16706.8	9606.22	46878.1	89179.1	136000	104371	1.18107	0.00960157	0.0376279	4.5026	2.17076	up
MW0150100	Glu-Phe-Glu	谷氨酸-苯丙氨酸-谷氨酸	Amino acids and derivatives	氨基酸及其衍生物	Amino acids and derivatives	氨基酸及其衍生物	C19H25N3O8	2	0.8269	-	25075.2	31041.6	21570.7	126108	111492	67138.4	1.28773	0.0477292	0.117001	3.92263	1.97182	up
MW0151691	Ile-Tyr	L-异亮氨酸-L-酪氨酸	Amino acids and derivatives	氨基酸及其衍生物	Amino acids and derivatives	氨基酸及其衍生物	C15H22N2O4	2	0.8209	-	15305.2	12265.6	15253.9	27299.3	32869.9	30852.6	1.31705	0.00236569	0.0143542	2.12545	1.08777	up
MW0146052	Asp-Asp-Glu	L-天冬氨酰-L-天冬氨酰-L-谷氨酸	Amino acids and derivatives	氨基酸及其衍生物	Amino acids and derivatives	氨基酸及其衍生物	C13H19N3O10	2	0.8205	-	104732	107015	141912	7343.46	17827.9	17115.6	1.30499	0.00902477	0.0358619	0.11957	-3.06407	down
MW0150519	Gly-Tyr-Met	甘氨酸-酪氨酸-蛋氨酸	Amino acids and derivatives	氨基酸及其衍生物	Amino acids and derivatives	氨基酸及其衍生物	C16H23N3O5S1	2	0.8185	-	31270	30942.3	29239	11500.8	10595.9	10025	1.35002	3.70243e-05	0.00167509	0.351243	-1.50946	down
MW0151154	His-Val-Ser	L-组氨酸-L-缬氨酸-L-丝氨酸	Amino acids and derivatives	氨基酸及其衍生物	Amino acids and derivatives	氨基酸及其衍生物	C14H23N5O5	2	0.8123	-	7089.94	6256.04	2511.88	15619.6	19981	23907.6	1.21224	0.0111672	0.0415796	3.7526	1.90789	up
MW0155389	Phe-Tyr-Met	苯丙氨酰-酪氨酰-蛋氨酸	Amino acids and derivatives	氨基酸及其衍生物	Amino acids and derivatives	氨基酸及其衍生物	C23H29N3O5S1	2	0.8105	-	8598.11	8958.84	8230.99	30325.9	42543.9	33603.9	1.34073	0.0176689	0.0574914	4.12882	2.04573	up
MW0148072	Cys-Thr-Tyr	半胱氨酸-苏氨酸-酪氨酸	Amino acids and derivatives	氨基酸及其衍生物	Amino acids and derivatives	氨基酸及其衍生物	C16H23N3O6S1	2	0.8084	-	523375	514021	445195	2.55576e+06	2.92424e+06	2.72617e+06	1.35114	0.00143735	0.0108653	5.53502	2.46859	up
MW0152897	Lys-Asp-Asp	L-赖氨酸-L-天冬氨酸-L-天冬氨酸	Amino acids and derivatives	氨基酸及其衍生物	Amino acids and derivatives	氨基酸及其衍生物	C14H24N4O8	2	0.8075	-	12457.1	5912.98	5658.52	100106	99322.5	108854	1.32926	3.17102e-05	0.00167509	12.8298	3.68143	up
MW0151135	His-Tyr-Ser	L-组氨酸-L-酪氨酸-L-丝氨酸	Amino acids and derivatives	氨基酸及其衍生物	Amino acids and derivatives	氨基酸及其衍生物	C18H23N5O6	2	0.8061	-	674.73	789.85	140.07	23738.3	28082.6	26419.4	1.30839	0.00198567	0.0128574	48.7585	5.60758	up
MW0150291	Gly-Ala-His	甘氨酸-丙氨酸-组氨酸	Amino acids and derivatives	氨基酸及其衍生物	Amino acids and derivatives	氨基酸及其衍生物	C11H17N5O4	2	0.8046	-	948.83	4113.64	706.93	6653.39	8148.91	6694.36	1.1235	0.0262008	0.076535	3.72598	1.89762	up
MW0107245	His-Asn-Arg	组氨酸-天门冬酰氨-精氨酸	Amino acids and derivatives	氨基酸及其衍生物	Amino acids and derivatives	氨基酸及其衍生物	C16H27N9O5	2	0.8045	-	34662.9	30433.8	30453.6	263521	273728	296826	1.35312	0.00132477	0.010326	8.72917	3.12584	up
MW0105871	Asp-Phe-Arg	L-天冬氨酰-L-苯丙氨酰-L-精氨酸	Amino acids and derivatives	氨基酸及其衍生物	Amino acids and derivatives	氨基酸及其衍生物	C19H28N6O6	2	0.8038	-	26974.8	30585.5	26849.2	86848.9	95783.1	134416	1.32532	0.0328752	0.0895687	3.75606	1.90922	up
MW0106916	Glu-Met-Lys	谷氨酸-蛋氨酸-赖氨酸	Amino acids and derivatives	氨基酸及其衍生物	Amino acids and derivatives	氨基酸及其衍生物	C16H30N4O6S1	2	0.8032	-	125060	106628	109446	468138	519294	579038	1.34769	0.00495669	0.0232157	4.59196	2.19911	up
MW0158103	Trp-Asn-Gly	色氨酸-天冬酰胺-甘氨酸	Amino acids and derivatives	氨基酸及其衍生物	Amino acids and derivatives	氨基酸及其衍生物	C17H21N5O5	2	0.7998	-	50602.1	55792	55423.6	110997	123734	130661	1.34178	0.00431613	0.0212248	2.25805	1.17508	up
MW0110061	Trp-Glu-Arg	色氨酸-谷氨酸-精氨酸	Amino acids and derivatives	氨基酸及其衍生物	Amino acids and derivatives	氨基酸及其衍生物	C22H31N7O6	2	0.7975	-	92137.9	77305.2	87760.4	556098	558320	566451	1.35279	3.69317e-07	0.000266836	6.53517	2.70823	up
MW0158421	Tyr-Cys-Asp	酪氨酸-半胱氨酸-天冬氨酸	Amino acids and derivatives	氨基酸及其衍生物	Amino acids and derivatives	氨基酸及其衍生物	C16H21N3O7S1	2	0.7971	-	485085	306719	431913	1.21382e+06	1.36095e+06	1.3817e+06	1.31699	0.000260288	0.00419884	3.23315	1.69294	up
MW0107442	Ile-His-Arg	L-异亮氨酸-L-组氨酸-L-精氨酸	Amino acids and derivatives	氨基酸及其衍生物	Amino acids and derivatives	氨基酸及其衍生物	C18H32N8O4	2	0.7965	-	60034.6	52258.9	53815.8	117055	114483	123280	1.34432	6.21286e-05	0.00212651	2.13605	1.09495	up
MW0153520	Met-Asp-Phe	L-蛋氨酸-L-天冬氨酸-L-苯丙氨酸	Amino acids and derivatives	氨基酸及其衍生物	Amino acids and derivatives	氨基酸及其衍生物	C18H25N3O6S1	2	0.7952	-	104130	81934	95925.4	324997	355544	358580	1.34556	0.000147111	0.00310509	3.68496	1.88165	up
MW0150161	Glu-Thr-His	谷氨酸-苏氨酸-组氨酸	Amino acids and derivatives	氨基酸及其衍生物	Amino acids and derivatives	氨基酸及其衍生物	C15H23N5O7	2	0.7951	-	140368	132774	129489	532673	566950	579098	1.35334	0.000628523	0.00684359	4.16937	2.05983	up
MW0144556	Ala-Glu-Asp	L-丙氨酰-L-谷氨酰-L-天冬氨酸	Amino acids and derivatives	氨基酸及其衍生物	Amino acids and derivatives	氨基酸及其衍生物	C12H19N3O8	2	0.7911	-	458098	459170	447994	181665	199952	243515	1.32343	0.00426584	0.0210731	0.457885	-1.12694	down
MW0155793	Pro-Asn-Gln	脯氨酰-天冬酰胺-谷氨酰胺	Amino acids and derivatives	氨基酸及其衍生物	Amino acids and derivatives	氨基酸及其衍生物	C14H23N5O6	2	0.7862	-	49794.7	45615.7	30843.2	83990.9	96922.8	94006.1	1.26415	0.00325989	0.0176666	2.17752	1.12269	up
MW0159048	Val-Ile-Thr	缬氨酸-异亮氨酸-苏氨酸	Amino acids and derivatives	氨基酸及其衍生物	Amino acids and derivatives	氨基酸及其衍生物	C15H29N3O5	2	0.7811	-	11671.7	13069.5	5311.46	41572	43463.4	36812.7	1.26166	0.000698938	0.00730584	4.05448	2.01952	up
MW0153525	Met-Cys-His	L-蛋氨酸-L-半胱氨酸-L-组氨酸	Amino acids and derivatives	氨基酸及其衍生物	Amino acids and derivatives	氨基酸及其衍生物	C14H23N5O4S2	2	0.7809	-	76324.1	23588.5	50024.3	177593	134558	101289	1.11356	0.0365193	0.0967308	2.75742	1.46332	up
MW0158588	Tyr-Pro-His	酪氨酸-脯氨酸-组氨酸	Amino acids and derivatives	氨基酸及其衍生物	Amino acids and derivatives	氨基酸及其衍生物	C20H25N5O5	2	0.7782	-	22679.3	18363.4	17286.4	6625.16	5056.09	3466.87	1.29862	0.00404929	0.0202964	0.259701	-1.94508	down
MW0153649	Met-Pro-Met	甲硫氨酰-脯氨酰-甲硫氨酸	Amino acids and derivatives	氨基酸及其衍生物	Amino acids and derivatives	氨基酸及其衍生物	C15H27N3O4S2	2	0.7775	-	15934.4	13780.6	15632.1	58642.1	74803.7	79303.2	1.34296	0.0116847	0.0428924	4.69157	2.23007	up
MW0158902	Val-Arg-Phe	缬氨酸-精氨酸-苯丙氨酸	Amino acids and derivatives	氨基酸及其衍生物	Amino acids and derivatives	氨基酸及其衍生物	C20H32N6O4	2	0.7739	-	9075.48	15196.4	7999.55	33939.2	37409.4	40369.8	1.29188	0.000946798	0.00864485	3.46184	1.79154	up
MW0105883	Asp-Val-Arg	Asp-Val-Arg	Amino acids and derivatives	氨基酸及其衍生物	Amino acids and derivatives	氨基酸及其衍生物	C15H28N6O6	2	0.7732	-	27002.3	6823.3	6086.46	3840.82	2640.32	2839.52	1.05544	0.274939	0.413696	0.23353	-2.09832	down
MW0158087	Trp-Ala-Glu	色氨酸-丙氨酸-谷氨酸	Amino acids and derivatives	氨基酸及其衍生物	Amino acids and derivatives	氨基酸及其衍生物	C19H24N4O6	2	0.7714	-	104025	68672.7	118439	413795	337433	425676	1.31314	0.00234736	0.0143019	4.04243	2.01522	up
MW0110256	Tyr-His	L-酪氨酸-L-组氨酸	Amino acids and derivatives	氨基酸及其衍生物	Amino acids and derivatives	氨基酸及其衍生物	C15H18N4O4	2	0.7712	-	69568.3	70906.6	65722.3	5326.71	3340.48	2797.14	1.34331	5.15663e-05	0.00198363	0.0555989	-4.1688	down
MW0107359	His-Trp	L-组氨酸-L-色氨酸	Amino acids and derivatives	氨基酸及其衍生物	Amino acids and derivatives	氨基酸及其衍生物	C17H19N5O3	2	0.7711	-	68677.9	9727.41	71480.4	221199	243083	251161	1.10922	0.00457418	0.0219784	4.77326	2.25497	up
MW0150924	His-Glu-Phe	组氨酸-谷氨酸-苯丙氨酸	Amino acids and derivatives	氨基酸及其衍生物	Amino acids and derivatives	氨基酸及其衍生物	C20H25N5O6	2	0.7657	-	8527.3	7696.48	7440.59	80063.2	87732.6	72366.8	1.35253	0.00360477	0.0187028	10.1487	3.34322	up
MW0109089	Phe-Ala-Leu	Phe-Ala-Leu	Amino acids and derivatives	氨基酸及其衍生物	Amino acids and derivatives	氨基酸及其衍生物	C18H27N3O4	2	0.7649	-	21370.4	20603.3	17007.8	38685.5	41082.8	38690.9	1.32602	0.000701295	0.00731801	2.00841	1.00605	up
MW0148022	Cys-Ile-His	半胱氨酸-异亮氨酸-组氨酸	Amino acids and derivatives	氨基酸及其衍生物	Amino acids and derivatives	氨基酸及其衍生物	C15H25N5O4S1	2	0.7647	-	98884.6	105267	102243	211385	249896	236818	1.34411	0.00630131	0.027381	2.27844	1.18804	up
MW0014461	Alkynyl 4-hydroxy-2-nonenal	4-羟基壬醛炔	Organic acids	有机酸	Organic acids	有机酸	C9H12O2	2	0.7634	-	117088	145332	150978	21432.6	15928	25268.1	1.33689	0.00538507	0.0245845	0.151497	-2.72264	down
MW0145899	Asn-Thr-Gln	L-天冬酰胺-L-苏氨酰-L-谷氨酰胺	Amino acids and derivatives	氨基酸及其衍生物	Amino acids and derivatives	氨基酸及其衍生物	C13H23N5O7	2	0.7621	-	11192	16243.1	21882.8	136990	141453	224640	1.3247	0.0324454	0.0890365	10.2008	3.35061	up
MW0151683	Ile-Phe	L-异亮氨酸-L-苯丙氨酸	Amino acids and derivatives	氨基酸及其衍生物	Amino acids and derivatives	氨基酸及其衍生物	C15H22N2O3	2	0.762	-	169729	176648	172168	65478.8	65374.3	69634.1	1.35324	5.77716e-06	0.000949365	0.386634	-1.37096	down
MW0158457	Tyr-Glu-Glu	酪氨酸谷氨酰谷氨酸	Amino acids and derivatives	氨基酸及其衍生物	Amino acids and derivatives	氨基酸及其衍生物	C19H25N3O9	2	0.7617	-	15066.5	15774.9	16932.9	49854.5	54880.4	54900.7	1.35098	0.000844715	0.00802849	3.34145	1.74048	up
MW0149949	Glu-Asp-Met	谷氨酸-天门冬氨酸-蛋氨酸	Amino acids and derivatives	氨基酸及其衍生物	Amino acids and derivatives	氨基酸及其衍生物	C14H23N3O8S1	2	0.7606	-	42842.7	43170.3	16908.7	13240.5	12534.8	9753.94	1.13176	0.120863	0.229679	0.345207	-1.53447	down
MW0155121	Phe-Asp-Asn	苯丙氨酰-天冬氨酰-天冬酰胺	Amino acids and derivatives	氨基酸及其衍生物	Amino acids and derivatives	氨基酸及其衍生物	C17H22N4O7	2	0.7596	-	47242.5	26114.3	16174.7	68663	60576	71230.2	1.11044	0.043949	0.110356	2.23909	1.16291	up
MW0149943	Glu-Asp-Asp	谷氨酸-天门冬氨酸-天门冬氨酸	Amino acids and derivatives	氨基酸及其衍生物	Amino acids and derivatives	氨基酸及其衍生物	C13H19N3O10	2	0.7595	-	29576.5	27441.9	35949.8	80212.1	76712	64220.2	1.31685	0.00425148	0.0210502	2.37871	1.25018	up
MW0106893	Glu-Asp-Leu	谷氨酸-天门冬氨酸-亮氨酸	Amino acids and derivatives	氨基酸及其衍生物	Amino acids and derivatives	氨基酸及其衍生物	C15H25N3O8	2	0.7593	-	27598.3	19499.4	28658.3	8920.63	10101.7	9287.59	1.31036	0.0303291	0.0849137	0.373699	-1.42005	down
MW0146006	Asp-Ala-Ile	L-天冬氨酰-L-丙氨酰-L-异亮氨酸	Amino acids and derivatives	氨基酸及其衍生物	Amino acids and derivatives	氨基酸及其衍生物	C13H23N3O6	2	0.7592	-	753323	728693	711747	1.45204e+06	1.59592e+06	1.5835e+06	1.3492	0.00189521	0.0125607	2.11119	1.07806	up
MW0156983	Ser-Val-Phe	丝氨酰-缬氨酰-苯丙氨酸	Amino acids and derivatives	氨基酸及其衍生物	Amino acids and derivatives	氨基酸及其衍生物	C17H25N3O5	2	0.7589	-	140497	139761	142736	57620.7	63425.9	63966.4	1.35035	9.50705e-05	0.00251072	0.437389	-1.19301	down
MW0158155	Trp-Gly-Leu	色氨酸-甘氨酸-亮氨酸	Amino acids and derivatives	氨基酸及其衍生物	Amino acids and derivatives	氨基酸及其衍生物	C19H26N4O4	2	0.7588	-	5632.68	5207.47	4401.02	184384	179628	209432	1.35337	0.00242793	0.0146283	37.6246	5.23361	up
MW0146129	Asp-His-Phe	L-天冬氨酰-L-组氨酰-L-苯丙氨酸	Amino acids and derivatives	氨基酸及其衍生物	Amino acids and derivatives	氨基酸及其衍生物	C19H23N5O6	2	0.7587	-	7335.88	13051.2	4287.71	19063	23126	22254.1	1.15283	0.0205364	0.0637569	2.6117	1.38499	up
MW0145374	Arg-His-His	L-精氨酰-L-组氨酰-L-组氨酸	Amino acids and derivatives	氨基酸及其衍生物	Amino acids and derivatives	氨基酸及其衍生物	C18H28N10O4	2	0.7581	-	56883.8	10216.1	17673.9	4100.54	5307.91	1630.15	1.13301	0.231084	0.366312	0.130212	-2.94106	down
MW0157568	Thr-Asn-Gly	苏氨酰-天冬酰胺-甘氨酸	Amino acids and derivatives	氨基酸及其衍生物	Amino acids and derivatives	氨基酸及其衍生物	C10H18N4O6	2	0.7575	-	3605.62	5121.72	2731.24	20111.7	21927.1	20302.1	1.32524	6.20043e-05	0.00212651	5.44054	2.44375	up
MW0150871	His-Asp-Glu	组氨酸-天门冬氨酸-谷氨酸	Amino acids and derivatives	氨基酸及其衍生物	Amino acids and derivatives	氨基酸及其衍生物	C15H21N5O8	2	0.7574	-	730.06	323.38	1621	108.47	289.64	176.93	1.0721	0.207508	0.340746	0.215013	-2.2175	down
MW0150859	His-Asn-Phe	组氨酸-天门冬酰氨-苯丙氨酸	Amino acids and derivatives	氨基酸及其衍生物	Amino acids and derivatives	氨基酸及其衍生物	C19H24N6O5	2	0.7574	-	18062.4	19026.7	14061.2	80463.5	37938.5	93466.9	1.24325	0.084391	0.176464	4.14209	2.05036	up
MW0158648	Tyr-Tyr-Gln	酪氨酸-酪氨酸-谷氨酰胺	Amino acids and derivatives	氨基酸及其衍生物	Amino acids and derivatives	氨基酸及其衍生物	C23H28N4O7	2	0.757	-	500.76	461.81	295.91	2495.77	2847.46	1912.09	1.32095	0.0144325	0.04975	5.76515	2.52736	up
MW0110336	Val-Asp-Arg	缬氨酸-天冬氨酸-精氨酸	Amino acids and derivatives	氨基酸及其衍生物	Amino acids and derivatives	氨基酸及其衍生物	C15H28N6O6	2	0.7563	-	14344.8	4946.68	17395	34838.4	37338.5	39832.8	1.14573	0.0126976	0.0453805	3.05317	1.61031	up
MW0155318	Phe-Pro-Ser	苯丙氨酰-脯氨酰-丝氨酸	Amino acids and derivatives	氨基酸及其衍生物	Amino acids and derivatives	氨基酸及其衍生物	C17H23N3O5	2	0.756	-	5254.36	1793.47	5983.62	34956.6	38585.1	35785.7	1.28255	5.55508e-05	0.00205191	8.3895	3.06859	up
MW0150989	His-Leu-Glu	组氨酸-亮氨酸-谷氨酸	Amino acids and derivatives	氨基酸及其衍生物	Amino acids and derivatives	氨基酸及其衍生物	C17H27N5O6	2	0.7558	-	9883.14	4046.04	4031.98	48137.1	44194.7	48617.5	1.30502	0.00013317	0.00290516	7.84745	2.97222	up
MW0153541	Met-Glu-Gln	蛋氨酸-谷氨酸-谷氨酰胺	Amino acids and derivatives	氨基酸及其衍生物	Amino acids and derivatives	氨基酸及其衍生物	C15H26N4O7S1	2	0.7552	-	4974.92	1477.33	6071.89	48319.7	46475	54121	1.28389	0.000264722	0.00423882	11.8903	3.57171	up
MW0151574	Ile-Ser-Glu	L-异亮氨酸-L-丝氨酸-L-谷氨酸	Amino acids and derivatives	氨基酸及其衍生物	Amino acids and derivatives	氨基酸及其衍生物	C14H25N3O7	2	0.755	-	24771.8	38925.4	18091.5	86152.4	47522.9	61136	1.14436	0.0590995	0.136129	2.38189	1.2521	up
MW0158438	Tyr-Gln-Leu	酪氨酸-谷氨酰胺-亮氨酸	Amino acids and derivatives	氨基酸及其衍生物	Amino acids and derivatives	氨基酸及其衍生物	C20H30N4O6	2	0.7547	-	276682	325335	330792	143598	171609	144488	1.32006	0.00369003	0.0189936	0.492807	-1.02091	down
MW0110227	Tyr-Tyr-Lys	酪氨酸-酪氨酸-赖氨酸	Amino acids and derivatives	氨基酸及其衍生物	Amino acids and derivatives	氨基酸及其衍生物	C24H32N4O6	2	0.7545	-	10935	13860.5	11646	115285	121023	140617	1.35076	0.0041264	0.0205876	10.3433	3.37062	up
MW0155763	Pro-Ala-Glu	脯氨酰-丙氨酰-谷氨酸	Amino acids and derivatives	氨基酸及其衍生物	Amino acids and derivatives	氨基酸及其衍生物	C13H21N3O6	2	0.7545	-	9928.89	4481.48	10173	24772.3	25500.1	27437	1.23716	0.00460034	0.0220714	3.16105	1.66041	up
MW0152471	Leu-Pro-Phe	L-亮氨酸-L-脯氨酸-L-苯丙氨酸	Amino acids and derivatives	氨基酸及其衍生物	Amino acids and derivatives	氨基酸及其衍生物	C20H29N3O4	2	0.7544	-	48368.1	69044.5	51759.1	14286.7	18623.5	20686.9	1.30797	0.019674	0.0619637	0.316821	-1.65826	down
MW0155281	Phe-Lys-Tyr	苯丙氨酰-赖氨酰-酪氨酸	Amino acids and derivatives	氨基酸及其衍生物	Amino acids and derivatives	氨基酸及其衍生物	C24H32N4O5	2	0.7543	-	11902.1	6228.7	7500.59	21727.6	14049.6	23964.5	1.16686	0.0423815	0.10824	2.3308	1.22083	up
MW0150329	Gly-Asp-Phe	甘氨酸-天门冬氨酸-苯丙氨酸	Amino acids and derivatives	氨基酸及其衍生物	Amino acids and derivatives	氨基酸及其衍生物	C15H19N3O6	2	0.7542	-	6440.39	14149.6	13671.6	34675.3	35290.3	46148.8	1.24541	0.00566392	0.0254114	3.38905	1.76088	up
MW0155088	Phe-Arg-Asp	苯丙氨酰精氨酰天冬氨酸	Amino acids and derivatives	氨基酸及其衍生物	Amino acids and derivatives	氨基酸及其衍生物	C19H28N6O6	2	0.7536	-	32496.7	35172.4	33094.3	77909.7	106487	50936.4	1.19516	0.107224	0.210976	2.3355	1.22373	up
MW0155125	Phe-Asp-Glu	苯丙氨酰-天冬氨酰-谷氨酸	Amino acids and derivatives	氨基酸及其衍生物	Amino acids and derivatives	氨基酸及其衍生物	C18H23N3O8	2	0.7536	-	17696.4	13674.4	16789.3	282.76	1307.91	648.47	1.30568	0.0042793	0.0211075	0.0464937	-4.42682	down
MW0151636	Ile-Tyr-Val	L-异亮氨酸-L-酪氨酸-L-缬氨酸	Amino acids and derivatives	氨基酸及其衍生物	Amino acids and derivatives	氨基酸及其衍生物	C20H31N3O5	2	0.7535	-	105292	75464.1	81564.9	529619	468740	434266	1.34243	0.00253575	0.0150376	5.46136	2.44926	up
MW0155374	Phe-Trp-Tyr	苯丙氨酰-色氨酸-酪氨酸	Amino acids and derivatives	氨基酸及其衍生物	Amino acids and derivatives	氨基酸及其衍生物	C29H30N4O5	2	0.7531	-	11697.6	4951.92	5810.34	39140.1	33867.8	46730.7	1.28936	0.00397125	0.0199823	5.33123	2.41447	up
MW0155129	Phe-Asp-His	苯丙氨酰-天冬氨酰-组氨酸	Amino acids and derivatives	氨基酸及其衍生物	Amino acids and derivatives	氨基酸及其衍生物	C19H23N5O6	2	0.7527	-	4356.17	5101.48	4882.8	43725	32190.7	15993	1.28333	0.084549	0.176733	6.40906	2.68011	up
MW0157840	Thr-Tyr-His	苏氨酸-酪氨酸-组氨酸	Amino acids and derivatives	氨基酸及其衍生物	Amino acids and derivatives	氨基酸及其衍生物	C19H25N5O6	2	0.7525	-	14269.5	27703.8	17623.6	42145.5	42352.3	49549.7	1.22246	0.0105929	0.0401899	2.24923	1.16943	up
MW0158424	Tyr-Cys-Leu	酪氨酸-半胱氨酸-亮氨酸	Amino acids and derivatives	氨基酸及其衍生物	Amino acids and derivatives	氨基酸及其衍生物	C18H27N3O5S1	2	0.7521	-	21982.8	20030.5	26427.9	6939.81	4416.52	14138.9	1.14394	0.0198813	0.0624389	0.372513	-1.42464	down
MW0153483	Met-Ala-Gln	L-蛋氨酸-L-丙氨酸-L-谷氨酰胺	Amino acids and derivatives	氨基酸及其衍生物	Amino acids and derivatives	氨基酸及其衍生物	C13H24N4O5S1	2	0.7514	-	3013.86	3912.11	9668.95	133529	96834.9	99712.1	1.31873	0.0106355	0.0402734	19.8902	4.31398	up
MW0153130	Lys-Ser-Gly	L-赖氨酸-L-丝氨酸-L-甘氨酸	Amino acids and derivatives	氨基酸及其衍生物	Amino acids and derivatives	氨基酸及其衍生物	C11H22N4O5	2	0.7513	-	17195.6	20457.3	11883.2	8058.3	9261.32	5656.52	1.17785	0.0547474	0.128881	0.463826	-1.10834	down
MW0157828	Thr-Trp-Trp	苏氨酸-色氨酸-色氨酸	Amino acids and derivatives	氨基酸及其衍生物	Amino acids and derivatives	氨基酸及其衍生物	C26H29N5O5	2	0.7512	-	2778.09	5307.37	568.07	41009.9	43583.4	50575.9	1.24433	0.00114092	0.00951711	15.6201	3.96533	up
MW0152388	Leu-Ile-Val	L-亮氨酸-L-异亮氨酸-L-缬氨酸	Amino acids and derivatives	氨基酸及其衍生物	Amino acids and derivatives	氨基酸及其衍生物	C17H33N3O4	2	0.7509	-	2.32957e+06	2.20913e+06	2.0987e+06	5.08317e+06	5.18582e+06	4.93831e+06	1.35055	8.65949e-06	0.00116551	2.29115	1.19607	up
MW0150873	His-Asp-His	组氨酸-天门冬氨酸-组氨酸	Amino acids and derivatives	氨基酸及其衍生物	Amino acids and derivatives	氨基酸及其衍生物	C16H21N7O6	2	0.7508	-	1298.97	19981.1	14016.3	50226.6	56557.1	56523.7	1.03503	0.00895097	0.0356995	4.62674	2.21	up
MW0144730	Ala-Ser-His	L-丙氨酰-L-丝氨酰-L-组氨酸	Amino acids and derivatives	氨基酸及其衍生物	Amino acids and derivatives	氨基酸及其衍生物	C12H19N5O5	2	0.7507	-	2.23982e+06	2.14973e+06	1.94087e+06	651168	606002	567611	1.34912	0.00199308	0.0128678	0.288256	-1.79458	down
MW0156871	Ser-Phe-Glu	L-丝氨酰-L-苯丙氨酰-L-谷氨酸	Amino acids and derivatives	氨基酸及其衍生物	Amino acids and derivatives	氨基酸及其衍生物	C17H23N3O7	2	0.7504	-	12449.4	19488	13849.4	30648.1	32299.8	36582.3	1.27271	0.00340366	0.0180924	2.17378	1.1202	up
MW0158362	Tyr-Ala-Ser	酪氨酸-丙氨酸-丝氨酸	Amino acids and derivatives	氨基酸及其衍生物	Amino acids and derivatives	氨基酸及其衍生物	C15H21N3O6	2	0.7501	-	75677	105979	58557.2	11097	19131.3	18848.6	1.29317	0.0401149	0.103816	0.204306	-2.2912	down
MW0168294	Phe Ile	Phe Ile	Amino acids and derivatives	氨基酸及其衍生物	Amino acids and derivatives	氨基酸及其衍生物	C15H22N2O3	2	0.7494	-	152500	138099	143039	43028	43581.9	43649	1.35339	0.00170705	0.0118332	0.300386	-1.73511	down
MW0158236	Trp-Ser-Ala	色氨酸-丝氨酸-丙氨酸	Amino acids and derivatives	氨基酸及其衍生物	Amino acids and derivatives	氨基酸及其衍生物	C17H22N4O5	2	0.7494	-	5760.2	8577.25	5935.7	21985.8	54038.7	75005.7	1.25482	0.105142	0.208075	7.44977	2.89719	up
MW0158565	Tyr-Phe-Gln	酪氨酸-苯丙氨酸-谷氨酰胺	Amino acids and derivatives	氨基酸及其衍生物	Amino acids and derivatives	氨基酸及其衍生物	C23H28N4O6	2	0.749	-	174446	175690	183657	78071.2	80388.8	90533.6	1.34436	6.60281e-05	0.00212651	0.466461	-1.10017	down
MW0157636	Thr-Glu-Met	苏氨酰-谷氨酰-甲硫氨酸	Amino acids and derivatives	氨基酸及其衍生物	Amino acids and derivatives	氨基酸及其衍生物	C14H25N3O7S1	2	0.7489	-	10374.1	8187.67	11939.6	53147.6	30254.2	59184.1	1.29365	0.0494314	0.119887	4.67474	2.22489	up
MW0153073	Lys-Met-Cys	L-赖氨酸-L-蛋氨酸-L-半胱氨酸	Amino acids and derivatives	氨基酸及其衍生物	Amino acids and derivatives	氨基酸及其衍生物	C14H28N4O4S2	2	0.7487	-	65611.4	25271.9	64683.1	100064	106114	110614	1.06038	0.049817	0.120439	2.03638	1.02601	up
MW0156984	Ser-Val-Ser	丝氨酰-缬氨酰-丝氨酸	Amino acids and derivatives	氨基酸及其衍生物	Amino acids and derivatives	氨基酸及其衍生物	C11H21N3O6	2	0.7486	-	34350.6	4968.45	11415.6	64241.1	88174	89079.8	1.15331	0.00636231	0.0275742	4.75995	2.25095	up
MW0109335	Pro-Ser-Arg	脯氨酰-丝氨酰-精氨酸	Amino acids and derivatives	氨基酸及其衍生物	Amino acids and derivatives	氨基酸及其衍生物	C14H26N6O5	2	0.7483	-	15477.1	22497.5	18731.6	71164.7	72620.3	80690.8	1.33689	0.00021912	0.00386043	3.95858	1.98498	up
MW0158164	Trp-His-Phe	色氨酸-组氨酸-苯丙氨酸	Amino acids and derivatives	氨基酸及其衍生物	Amino acids and derivatives	氨基酸及其衍生物	C26H28N6O4	2	0.7477	-	1432.33	2116.43	2304.6	51207.1	50054	49785.1	1.34964	8.7511e-07	0.000458826	25.805	4.68958	up
MW0155914	Pro-Leu-Met	脯氨酰-亮氨酰-蛋氨酸	Amino acids and derivatives	氨基酸及其衍生物	Amino acids and derivatives	氨基酸及其衍生物	C16H29N3O4S1	2	0.7475	-	69054.1	49624.3	48993.5	1281.73	11255.9	1306.56	1.22067	0.00640325	0.0277238	0.082567	-3.59829	down
MW0107750	Leu-Pro-Leu	L-亮氨酸-L-脯氨酸-L-亮氨酸	Amino acids and derivatives	氨基酸及其衍生物	Amino acids and derivatives	氨基酸及其衍生物	C17H31N3O4	2	0.7467	-	9587.7	14077	15325.5	69012	74156.1	66546.2	1.33518	5.71025e-05	0.00207387	5.37864	2.42724	up
MW0158130	Trp-Gln-Glu	色氨酸-谷氨酰胺-谷氨酸	Amino acids and derivatives	氨基酸及其衍生物	Amino acids and derivatives	氨基酸及其衍生物	C21H27N5O7	2	0.7459	-	2916.68	6226.15	8311.45	148192	156790	160023	1.33236	7.39669e-05	0.00223998	26.6414	4.7356	up
MW0155919	Pro-Leu-Val	脯氨酰-亮氨酰-缬氨酸	Amino acids and derivatives	氨基酸及其衍生物	Amino acids and derivatives	氨基酸及其衍生物	C16H29N3O4	2	0.7457	-	57928.5	59622.3	57174.7	21733.5	33687.9	28079.9	1.28315	0.0101518	0.0389591	0.4779	-1.06522	down
MW0155304	Phe-Phe-Met	苯丙氨酰-苯丙氨酰-蛋氨酸	Amino acids and derivatives	氨基酸及其衍生物	Amino acids and derivatives	氨基酸及其衍生物	C23H29N3O4S1	2	0.7451	-	52679.9	48322.9	48480.4	13890.7	20270.4	21881.2	1.30243	0.00114481	0.00951711	0.374908	-1.41539	down
MW0155830	Pro-Gln-Gln	脯氨酰-谷氨酰胺-谷氨酰胺	Amino acids and derivatives	氨基酸及其衍生物	Amino acids and derivatives	氨基酸及其衍生物	C15H25N5O6	2	0.745	-	1806.44	2720.44	1064.26	21696.7	26688.8	7363.29	1.24385	0.10099	0.201293	9.97091	3.31773	up
MW0153693	Met-Trp-Ser	甲硫氨酰-色氨酸-丝氨酸	Amino acids and derivatives	氨基酸及其衍生物	Amino acids and derivatives	氨基酸及其衍生物	C19H26N4O5S1	2	0.7435	-	9280.07	8083.92	10050.9	71310.1	82756.1	82572.7	1.3512	0.00244439	0.0146731	8.63177	3.10966	up
MW0149813	Gln-Thr-Asp	谷酰氨-苏氨酸-天门冬氨酸	Amino acids and derivatives	氨基酸及其衍生物	Amino acids and derivatives	氨基酸及其衍生物	C13H22N4O8	2	0.7427	-	13385.6	15088.7	20253.9	148676	156159	151727	1.34693	1.45349e-06	0.000559718	9.36957	3.22798	up
MW0155941	Pro-Met-Glu	脯氨酰-甲硫氨酰-谷氨酸	Amino acids and derivatives	氨基酸及其衍生物	Amino acids and derivatives	氨基酸及其衍生物	C15H25N3O6S1	2	0.742	-	95366.9	88120.2	83811.4	5305.72	7068.12	4343.01	1.34755	0.000982461	0.00884623	0.06254	-3.99908	down
MW0155874	Pro-His-Ala	脯氨酰-组氨酰-丙氨酸	Amino acids and derivatives	氨基酸及其衍生物	Amino acids and derivatives	氨基酸及其衍生物	C14H21N5O4	2	0.7418	-	25086.5	25435.1	26407.7	6920.1	12782.1	13819	1.21108	0.0185916	0.0593928	0.43574	-1.19846	down
MW0159247	Val-Val-Tyr	缬氨酸-缬氨酸-酪氨酸	Amino acids and derivatives	氨基酸及其衍生物	Amino acids and derivatives	氨基酸及其衍生物	C19H29N3O5	2	0.7404	-	47480.4	47246.7	36742.7	118441	115313	138412	1.32969	0.00246138	0.0147612	2.83081	1.50121	up
MW0155400	Phe-Val-Asn	苯丙氨酰-缬氨酰-天冬酰胺	Amino acids and derivatives	氨基酸及其衍生物	Amino acids and derivatives	氨基酸及其衍生物	C18H26N4O5	2	0.7396	-	6924.05	2726.09	1758.98	66825.3	84179.5	78614.1	1.31146	0.00260251	0.0152606	20.1259	4.33098	up
MW0155309	Phe-Phe-Val	苯丙氨酰-苯丙氨酰-缬氨酸	Amino acids and derivatives	氨基酸及其衍生物	Amino acids and derivatives	氨基酸及其衍生物	C23H29N3O4	2	0.7392	-	16371.4	11667.4	15568.5	51009.2	40371.5	73867.6	1.29295	0.0518202	0.123627	3.78947	1.922	up
MW0153614	Met-Lys-Tyr	甲硫氨酰-赖氨酰-酪氨酸	Amino acids and derivatives	氨基酸及其衍生物	Amino acids and derivatives	氨基酸及其衍生物	C20H32N4O5S1	2	0.7389	-	1879.14	313.15	14811.8	29177.8	48734.9	42670.1	1.07738	0.010672	0.0402903	7.09141	2.82607	up
MW0152869	Lys-Arg-Leu	L-赖氨酸-L-精氨酸-L-亮氨酸	Amino acids and derivatives	氨基酸及其衍生物	Amino acids and derivatives	氨基酸及其衍生物	C18H37N7O4	2	0.7383	-	1380.47	1581.71	3553.09	14701.9	14581.2	13809.7	1.29853	0.00101679	0.00895689	6.61411	2.72555	up
MW0144680	Ala-Met-Phe	L-丙氨酰-L-甲硫氨酰-L-苯丙氨酸	Amino acids and derivatives	氨基酸及其衍生物	Amino acids and derivatives	氨基酸及其衍生物	C17H25N3O4S1	2	0.7383	-	181360	157881	164883	377440	450164	441227	1.33991	0.00471412	0.0223371	2.5169	1.33165	up
MW0148003	Cys-Gln-Ser	半胱氨酸-谷酰氨-丝氨酸	Amino acids and derivatives	氨基酸及其衍生物	Amino acids and derivatives	氨基酸及其衍生物	C11H20N4O6S1	2	0.7376	-	538.59	1261.56	1819.76	6453.76	2910.66	1994.16	1.018	0.19213	0.324088	3.13781	1.64976	up
MW0151058	His-Pro-Asp	组氨酸-脯氨酸-天门冬氨酸	Amino acids and derivatives	氨基酸及其衍生物	Amino acids and derivatives	氨基酸及其衍生物	C15H21N5O6	2	0.7375	-	87410.8	97415.6	95240.9	713213	761467	441584	1.33257	0.0316459	0.0874575	6.84216	2.77445	up
MW0157808	Thr-Thr-Arg	苏氨酸-苏氨酸-精氨酸	Amino acids and derivatives	氨基酸及其衍生物	Amino acids and derivatives	氨基酸及其衍生物	C14H28N6O6	2	0.7371	-	110851	114889	96415.6	373758	389174	419915	1.34854	0.000593995	0.00654502	3.67167	1.87644	up
MW0155142	Phe-Cys-Asp	苯丙氨酰-半胱氨酰-天冬氨酸	Amino acids and derivatives	氨基酸及其衍生物	Amino acids and derivatives	氨基酸及其衍生物	C16H21N3O6S1	2	0.7371	-	33549.3	47876.8	26218.5	165872	174253	179121	1.32343	0.000191492	0.00353663	4.82371	2.27014	up
MW0158382	Tyr-Arg-Met	酪氨酸-精氨酸-甲硫氨酸	Amino acids and derivatives	氨基酸及其衍生物	Amino acids and derivatives	氨基酸及其衍生物	C20H32N6O5S1	2	0.7368	-	205269	118870	77322.7	46776.1	47985.2	40719.3	1.17815	0.142435	0.259876	0.337468	-1.56718	down
MW0155308	Phe-Phe-Tyr	苯丙氨酰-苯丙氨酰-酪氨酸	Amino acids and derivatives	氨基酸及其衍生物	Amino acids and derivatives	氨基酸及其衍生物	C27H29N3O5	2	0.7366	-	13239	19712.4	18136.8	10528	4650.49	7764.04	1.14314	0.0228855	0.0693282	0.449077	-1.15496	down
MW0153573	Met-His-Tyr	甲硫氨酰-组氨酰-酪氨酸	Amino acids and derivatives	氨基酸及其衍生物	Amino acids and derivatives	氨基酸及其衍生物	C20H27N5O5S1	2	0.7364	-	85249.1	92394.3	115153	39301.4	58436.5	37279.6	1.24581	0.011423	0.0422521	0.461131	-1.11675	down
MW0146238	Asp-Pro-Gly	L-天冬氨酰-L-脯氨酰-甘氨酸	Amino acids and derivatives	氨基酸及其衍生物	Amino acids and derivatives	氨基酸及其衍生物	C11H17N3O6	2	0.7356	-	59472.4	43436.5	53319.2	18919.7	14888.7	20077.1	1.31664	0.0115578	0.0425947	0.344916	-1.53568	down
MW0155951	Pro-Met-Val	脯氨酰-甲硫氨酰-缬氨酸	Amino acids and derivatives	氨基酸及其衍生物	Amino acids and derivatives	氨基酸及其衍生物	C15H27N3O4S1	2	0.7355	-	173388	200171	131158	441368	467761	491235	1.31531	0.000464819	0.00575578	2.77455	1.47225	up
MW0151021	His-Lys-Val	组氨酸-赖氨酸-缬氨酸	Amino acids and derivatives	氨基酸及其衍生物	Amino acids and derivatives	氨基酸及其衍生物	C17H30N6O4	2	0.7352	-	18547	12504.4	20577.6	54607.4	64005.9	58034.8	1.31325	0.000370131	0.00503394	3.42149	1.77462	up
MW0107077	Gly-Leu-Met	甘氨酸-亮氨酸-蛋氨酸	Amino acids and derivatives	氨基酸及其衍生物	Amino acids and derivatives	氨基酸及其衍生物	C13H25N3O4S1	2	0.7345	-	33009	33264.5	35447.5	68741.8	70713.7	80207.9	1.34248	0.00604589	0.0265501	2.15947	1.11068	up
MW0155623	14-Methyl-3,12-dioxahexacyclo[16.3.1.04,21.05,10.011,20.015,19]docosa-5(10),7-diene-2,6,9-trione	14-甲基-3,12-二氧六环[16.3.1.04,21.05,10.011,20.015,19]docosa-5(10),7-diene-2,6,9-trione	Benzene and substituted derivatives	苯及其衍生物	Benzene and substituted derivatives	苯及其衍生物	C21H22O5	2	0.7338	-	3397.89	4990.61	4148.04	33162.1	36277.3	37299.8	1.3472	0.000481765	0.00585884	8.51424	3.08988	up
MW0155232	Phe-Ile-Met	苯丙氨酰-异亮氨酰-蛋氨酸	Amino acids and derivatives	氨基酸及其衍生物	Amino acids and derivatives	氨基酸及其衍生物	C20H31N3O4S1	2	0.7336	-	11405.5	11863.4	12883.9	363.57	3278.36	2474.42	1.13557	0.00210263	0.0132839	0.16918	-2.56337	down
MW0159241	Val-Val-Ile	缬氨酸-缬氨酸-异亮氨酸	Amino acids and derivatives	氨基酸及其衍生物	Amino acids and derivatives	氨基酸及其衍生物	C16H31N3O4	2	0.7326	-	52210.6	55904.7	44233.1	181066	179062	175660	1.34666	9.58275e-05	0.00251072	3.51685	1.81429	up
MW0158427	Tyr-Cys-Trp	酪氨酸-半胱氨酸-色氨酸	Amino acids and derivatives	氨基酸及其衍生物	Amino acids and derivatives	氨基酸及其衍生物	C23H26N4O5S1	2	0.7324	-	37214.9	11686.6	20203.5	169544	172092	176446	1.29199	0.00140149	0.0106938	7.49701	2.90631	up
MW0149676	Gln-Glu-Asp	谷酰氨-谷氨酸-天门冬氨酸	Amino acids and derivatives	氨基酸及其衍生物	Amino acids and derivatives	氨基酸及其衍生物	C14H22N4O9	2	0.7324	-	2545.19	8241	8855.44	43678.8	45407.7	48482.2	1.26314	0.000183916	0.00347569	7.00393	2.80817	up
MW0156722	Ser-Glu-Ala	丝氨酰-谷氨酰-丙氨酸	Amino acids and derivatives	氨基酸及其衍生物	Amino acids and derivatives	氨基酸及其衍生物	C11H19N3O7	2	0.7321	-	3153.48	2772.94	3769.7	53767	51059.8	58675.4	1.35172	0.00162108	0.011513	16.8627	4.07576	up
MW0148027	Cys-Leu-His	半胱氨酸-亮氨酸-组氨酸	Amino acids and derivatives	氨基酸及其衍生物	Amino acids and derivatives	氨基酸及其衍生物	C15H25N5O4S1	2	0.7318	-	2.73041e+06	2.49661e+06	2.46619e+06	5.59005e+06	6.13585e+06	6.42678e+06	1.34501	0.00230985	0.0141397	2.35957	1.23853	up
MW0153677	Met-Thr-His	甲硫氨酰-苏氨酰-组氨酸	Amino acids and derivatives	氨基酸及其衍生物	Amino acids and derivatives	氨基酸及其衍生物	C15H25N5O5S1	2	0.7313	-	27814.9	15915.7	11493.7	74905.8	80332.4	83494.7	1.28263	0.00156581	0.0112978	4.32297	2.11202	up
MW0155335	Phe-Ser-Met	苯丙氨酰-丝氨酰-甲硫氨酸	Amino acids and derivatives	氨基酸及其衍生物	Amino acids and derivatives	氨基酸及其衍生物	C17H25N3O5S1	2	0.7304	-	88932.7	135369	94649.4	242332	248881	260561	1.29689	0.00517167	0.0238616	2.35702	1.23697	up
MW0158433	Tyr-Gln-Gln	酪氨酸-谷氨酸-谷氨酰胺	Amino acids and derivatives	氨基酸及其衍生物	Amino acids and derivatives	氨基酸及其衍生物	C19H27N5O7	2	0.7297	-	41784.1	12208	19974.7	139948	197709	156006	1.27094	0.00553036	0.0250718	6.67412	2.73858	up
MW0109323	Pro-Leu-Lys	脯氨酰-亮氨酰-赖氨酸	Amino acids and derivatives	氨基酸及其衍生物	Amino acids and derivatives	氨基酸及其衍生物	C17H32N4O4	2	0.7267	-	8142.93	6381.1	7686.06	560.99	1366.26	1833.31	1.26402	0.0011244	0.00949311	0.169318	-2.5622	down
MW0151022	His-Met-Ala	组氨酸-蛋氨酸-丙氨酸	Amino acids and derivatives	氨基酸及其衍生物	Amino acids and derivatives	氨基酸及其衍生物	C14H23N5O4S1	2	0.7264	-	13469.2	32036.4	24787.1	11349.9	12068.3	11148.3	1.05961	0.157988	0.280623	0.491752	-1.024	down
MW0149971	Glu-Gln-Glu	古氨酸-谷酰胺-谷氨酸	Amino acids and derivatives	氨基酸及其衍生物	Amino acids and derivatives	氨基酸及其衍生物	C15H24N4O9	2	0.7259	-	14106.8	13692.5	12003.4	27914.1	60181.1	61874.2	1.24982	0.0793419	0.168894	3.76782	1.91373	up
MW0158956	Val-Cys-Leu	缬氨酸-半胱氨酸-亮氨酸	Amino acids and derivatives	氨基酸及其衍生物	Amino acids and derivatives	氨基酸及其衍生物	C14H27N3O4S1	2	0.7254	-	101626	90890.7	87690.1	278823	297353	309195	1.34903	0.000333861	0.00471833	3.1597	1.65979	up
MW0158647	Tyr-Tyr-Asp	酪氨酸-酪氨酸-天冬氨酸	Amino acids and derivatives	氨基酸及其衍生物	Amino acids and derivatives	氨基酸及其衍生物	C22H25N3O8	2	0.7254	-	33361.6	48509.6	51455.4	92003.2	90917	112636	1.26815	0.00456715	0.0219608	2.21679	1.14847	up
MW0158142	Trp-Glu-Gln	色氨酸-谷氨酸-谷氨酰胺	Amino acids and derivatives	氨基酸及其衍生物	Amino acids and derivatives	氨基酸及其衍生物	C21H27N5O7	2	0.7251	-	84382.9	91248	86960.3	242284	260999	245529	1.35245	0.000422237	0.00548624	2.85163	1.51179	up
MW0149843	Gln-Tyr-Phe	谷酰氨-酪氨酸-苯丙氨酸	Amino acids and derivatives	氨基酸及其衍生物	Amino acids and derivatives	氨基酸及其衍生物	C23H28N4O6	2	0.7248	-	14075.8	20691.3	11529.8	5817.29	6172.6	8933.03	1.18385	0.0766217	0.165267	0.45193	-1.14583	down
MW0156326	R-4-benzyl-3-isobutyryloxazolidin-2-one	R-4-苄基-3-异丁酰恶唑烷-2-	Benzene and substituted derivatives	苯及其衍生物	Benzene and substituted derivatives	苯及其衍生物	C14H17NO3	2	0.7248	-	77463	75395.2	75940.3	360547	387781	402298	1.35381	0.00154517	0.0111861	5.02899	2.33027	up
MW0158405	Tyr-Asp-Ala	酪氨酸-天冬氨酸-丙氨酸	Amino acids and derivatives	氨基酸及其衍生物	Amino acids and derivatives	氨基酸及其衍生物	C16H21N3O7	2	0.7246	-	96427.9	90335.1	93713.4	40228.9	37011.3	46748	1.33528	0.000323347	0.00467128	0.442063	-1.17768	down
MW0149899	Glu-Ala-His	谷氨酸-丙氨酸-组氨酸	Amino acids and derivatives	氨基酸及其衍生物	Amino acids and derivatives	氨基酸及其衍生物	C14H21N5O6	2	0.7244	-	14993.9	10129.6	12074.7	2017.2	2160.92	1640.75	1.3397	0.0168429	0.0558368	0.156429	-2.67642	down
MW0158661	Tyr-Val-Asn	酪氨酸-缬氨酸-天冬酰胺	Amino acids and derivatives	氨基酸及其衍生物	Amino acids and derivatives	氨基酸及其衍生物	C18H26N4O6	2	0.7238	-	10042.9	6356.49	8615.45	22198.9	24668.5	28221.9	1.30719	0.00264651	0.0154166	3.00179	1.58582	up
MW0145477	Arg-Pro-Asp	L-精氨酰-L-脯氨酰-L-天冬氨酸	Amino acids and derivatives	氨基酸及其衍生物	Amino acids and derivatives	氨基酸及其衍生物	C15H26N6O6	2	0.7234	-	94234	87623.4	86778.2	247221	281214	265985	1.35019	0.00201343	0.0129341	2.95724	1.56425	up
MW0156052	Pro-Val-Met	脯氨酰-缬氨酰-蛋氨酸	Amino acids and derivatives	氨基酸及其衍生物	Amino acids and derivatives	氨基酸及其衍生物	C15H27N3O4S1	2	0.7225	-	2689.29	2771.76	12385.6	12132.2	14569.5	14624.5	1.00027	0.128015	0.239835	2.31563	1.21141	up
MW0168255	n6-(cis-hydroxyisopentenyl)adenosine	n6-(顺式-羟基异戊烯基)腺苷	Nucleotides and derivatives	核苷酸及其衍生物	Nucleotides and derivatives	核苷酸及其衍生物	C15H21N5O5	2	0.7215	-	200569	182700	180281	75314.8	78407	82743.1	1.34837	0.0015096	0.0110835	0.419599	-1.25292	down
MW0156754	Ser-Gly-His	L-丝氨酰-甘氨酰-L-组氨酸	Amino acids and derivatives	氨基酸及其衍生物	Amino acids and derivatives	氨基酸及其衍生物	C11H17N5O5	2	0.7214	-	4521.62	970.23	6247.66	97933.3	107180	107107	1.28847	9.79896e-05	0.00251791	26.5957	4.73312	up
MW0109111	Phe-His	苯丙氨酰-组氨酸	Amino acids and derivatives	氨基酸及其衍生物	Amino acids and derivatives	氨基酸及其衍生物	C15H18N4O3	2	0.721	-	805.85	201.43	116.25	8481.81	7836.7	12872.4	1.28493	0.0256051	0.0751508	25.9814	4.69941	up
MW0158609	Tyr-Ser-Met	酪氨酸-丝氨酸-甲硫氨酸	Amino acids and derivatives	氨基酸及其衍生物	Amino acids and derivatives	氨基酸及其衍生物	C17H25N3O6S1	2	0.7208	-	185423	170957	168930	828156	877488	891501	1.35348	0.000362051	0.00496614	4.94402	2.30568	up
MW0152910	Lys-Asp-Ser	L-赖氨酸-L-天冬氨酸-L-丝氨酸	Amino acids and derivatives	氨基酸及其衍生物	Amino acids and derivatives	氨基酸及其衍生物	C13H24N4O7	2	0.7206	-	69312	38434.3	40711.3	14572.3	16851	17633.5	1.27289	0.0781305	0.166916	0.330443	-1.59752	down
MW0150828	His-Ala-Tyr	组氨酸-丙氨酸-酪氨酸	Amino acids and derivatives	氨基酸及其衍生物	Amino acids and derivatives	氨基酸及其衍生物	C18H23N5O5	2	0.7205	-	19965.3	11982.5	19992.9	6103.05	5280.01	5142.51	1.29124	0.0458122	0.11363	0.318163	-1.65216	down
MW0155860	Pro-Glu-Thr	脯氨酰-谷氨酰-苏氨酸	Amino acids and derivatives	氨基酸及其衍生物	Amino acids and derivatives	氨基酸及其衍生物	C14H23N3O7	2	0.7203	-	546.04	5250.26	1764.14	38486.4	29785.9	34247.7	1.24035	0.00129714	0.0102215	13.5601	3.76129	up
MW0150438	Gly-Met-Thr	甘氨酸-蛋氨酸-苏氨酸	Amino acids and derivatives	氨基酸及其衍生物	Amino acids and derivatives	氨基酸及其衍生物	C11H21N3O5S1	2	0.7199	-	27823.8	28717.3	24283.9	6724.68	2727.6	6660.89	1.2753	0.000338696	0.00475564	0.199358	-2.32656	down
MW0114997	N-ethyl-N-Methylcathinone	N-乙基-N-甲基卡西酮	Others	其它类	Ketone compounds	酮类化合物	C12H17NO	2	0.7196	-	55221.1	54028.2	60762.9	210537	227389	190416	1.34879	0.0037443	0.0192004	3.69587	1.88591	up
MW0144703	Ala-Phe-Val	L-丙氨酰-L-苯丙氨酰-L-缬氨酸	Amino acids and derivatives	氨基酸及其衍生物	Amino acids and derivatives	氨基酸及其衍生物	C17H25N3O4	2	0.7195	-	64722.3	117275	98034.2	188124	183297	214758	1.2233	0.00799413	0.0329758	2.09326	1.06575	up
MW0156778	Ser-His-Met	丝氨酰-组氨酰-蛋氨酸	Amino acids and derivatives	氨基酸及其衍生物	Amino acids and derivatives	氨基酸及其衍生物	C14H23N5O5S1	2	0.7183	-	63161.2	139844	132695	453474	478630	449333	1.27956	0.0019939	0.0128678	4.11509	2.04093	up
MW0148043	Cys-Met-Ala	半胱氨酸-蛋氨酸-丙氨酸	Amino acids and derivatives	氨基酸及其衍生物	Amino acids and derivatives	氨基酸及其衍生物	C11H21N3O4S2	2	0.716	-	17690.9	16113.8	3173.61	58211.4	51871.1	61441.4	1.14545	0.00249031	0.0148664	4.6385	2.21366	up
MW0109129	Phe-Pro-Glu	苯丙氨酰-脯氨酰-谷氨酸	Amino acids and derivatives	氨基酸及其衍生物	Amino acids and derivatives	氨基酸及其衍生物	C19H25N3O6	2	0.716	-	46517.9	40010.4	52018.6	25521.3	15784.1	15601.9	1.26124	0.00472374	0.0223664	0.410744	-1.28369	down
MW0151086	His-Ser-Ser	L-组氨酸-L-丝氨酸-L-丝氨酸	Amino acids and derivatives	氨基酸及其衍生物	Amino acids and derivatives	氨基酸及其衍生物	C12H19N5O6	2	0.7139	-	26721.7	12116.4	23177.8	46433.8	47458.5	49145.7	1.18766	0.0226178	0.0686876	2.30647	1.20569	up
MW0155858	Pro-Glu-Met	脯氨酰-谷氨酰-蛋氨酸	Amino acids and derivatives	氨基酸及其衍生物	Amino acids and derivatives	氨基酸及其衍生物	C15H25N3O6S1	2	0.7138	-	35027.2	34513.3	36592.3	14492.8	7706.44	16758	1.23417	0.0112441	0.0417941	0.367061	-1.44591	down
MW0105658	Arg-Gly-Lys	L-精氨酰-甘氨酰-L-赖氨酸	Amino acids and derivatives	氨基酸及其衍生物	Amino acids and derivatives	氨基酸及其衍生物	C14H29N7O4	2	0.7136	-	11160.4	5927.39	15030.8	25791.9	26830.6	28771.3	1.18558	0.0169777	0.056107	2.53416	1.34151	up
MW0157674	Thr-Ile-Ala	苏氨酰-异亮氨酰-丙氨	Amino acids and derivatives	氨基酸及其衍生物	Amino acids and derivatives	氨基酸及其衍生物	C13H25N3O5	2	0.7129	-	17410.9	15378.7	32693.5	9399.56	8379.38	6936.21	1.19202	0.12842	0.240316	0.377427	-1.40573	down
MW0158119	Trp-Asp-Val	色氨酸-天冬氨酸-缬氨酸	Amino acids and derivatives	氨基酸及其衍生物	Amino acids and derivatives	氨基酸及其衍生物	C20H26N4O6	2	0.7118	-	51032.7	39985.3	43101.3	4142.85	4218.6	3225.74	1.34931	0.00604044	0.0265501	0.0863947	-3.53291	down
MW0146300	Asp-Tyr-Glu	L-天冬氨酰-L-酪氨酰-L-谷氨酸	Amino acids and derivatives	氨基酸及其衍生物	Amino acids and derivatives	氨基酸及其衍生物	C18H23N3O9	2	0.7117	-	13576.3	8422.65	13154.9	5273.45	1446	2140.62	1.18874	0.0154868	0.0524646	0.252036	-1.9883	down
MW0132617	5-Hydroxypseudobaptigenin	3′，4′-亚甲二氧基苯	Heterocyclic compounds	杂环化合物	Heterocyclic compounds	杂环化合物	C16H10O6	2	0.7115	-	28538.6	32157.1	28854.9	11005.4	11519.4	9580.76	1.3434	0.000739788	0.0074605	0.358517	-1.47989	down
MW0150969	His-Ile-Cys	组氨酸-异亮氨酸-半胱氨酸	Amino acids and derivatives	氨基酸及其衍生物	Amino acids and derivatives	氨基酸及其衍生物	C15H25N5O4S1	2	0.7106	-	46217.6	85444.1	98615.8	318847	152679	150571	1.11315	0.135307	0.249895	2.70151	1.43377	up
MW0110064	Trp-His-Lys	色氨酸-组氨酸-赖氨酸	Amino acids and derivatives	氨基酸及其衍生物	Amino acids and derivatives	氨基酸及其衍生物	C23H31N7O4	2	0.7097	-	14775.7	3082.52	3562.12	44394.5	49035.8	57428.7	1.23216	0.00132873	0.0103268	7.04279	2.81615	up
MW0155832	Pro-Gln-Glu	脯氨酰-谷氨酰胺-谷氨酸	Amino acids and derivatives	氨基酸及其衍生物	Amino acids and derivatives	氨基酸及其衍生物	C15H24N4O7	2	0.7095	-	67217.3	41267.2	219417	12252	17122.6	9266.21	1.18701	0.224671	0.359573	0.117843	-3.08506	down
MW0152276	Leu-Cys-His	L-亮氨酸-L-半胱氨酸-L-组氨酸	Amino acids and derivatives	氨基酸及其衍生物	Amino acids and derivatives	氨基酸及其衍生物	C15H25N5O4S1	2	0.7077	-	171057	159907	168233	64220.5	69699.7	68636.3	1.35151	0.000135636	0.00294906	0.405765	-1.30128	down
MW0105481	Ala-Pro-Glu	L-丙氨酰-L-脯氨酰-L-谷氨酸	Amino acids and derivatives	氨基酸及其衍生物	Amino acids and derivatives	氨基酸及其衍生物	C13H21N3O6	2	0.7056	-	28742.7	22183	20220	50254.7	46896.2	45380.6	1.29371	0.00337645	0.0180216	2.00338	1.00243	up
MW0146058	Asp-Asp-Phe	L-天冬氨酰-L-天冬氨酰-L-苯丙氨酸	Amino acids and derivatives	氨基酸及其衍生物	Amino acids and derivatives	氨基酸及其衍生物	C17H21N3O8	2	0.7055	-	24691.6	27343.7	25518.6	67456.6	65820.3	70364.6	1.35128	6.12827e-05	0.00212651	2.62581	1.39276	up
MW0110351	Val-Ile-Lys	缬氨酸-异亮氨酸-赖氨酸	Amino acids and derivatives	氨基酸及其衍生物	Amino acids and derivatives	氨基酸及其衍生物	C17H34N4O4	2	0.7054	-	42062.5	42494.4	45074.8	16217.4	11686.4	13831.2	1.33587	0.000106768	0.00262915	0.321951	-1.63509	down
MW0156024	Pro-Tyr-Asn	脯氨酰-酪氨酰-天冬酰胺	Amino acids and derivatives	氨基酸及其衍生物	Amino acids and derivatives	氨基酸及其衍生物	C18H24N4O6	2	0.7047	-	8086.91	10472.8	7681.25	2215.61	1045.86	1254.91	1.3074	0.00685942	0.0292414	0.172112	-2.53858	down
MW0153563	Met-His-Asn	甲硫氨酰-组氨酰-天冬酰胺	Amino acids and derivatives	氨基酸及其衍生物	Amino acids and derivatives	氨基酸及其衍生物	C15H24N6O5S1	2	0.703	-	42061.9	39238.5	36151	100177	114024	73359.1	1.29296	0.0391919	0.102201	2.44833	1.2918	up
MW0156745	Ser-Glu-Trp	丝氨酰-谷氨酰-色氨酸	Amino acids and derivatives	氨基酸及其衍生物	Amino acids and derivatives	氨基酸及其衍生物	C19H24N4O7	2	0.7027	-	7556.45	21164.7	14123.8	73064	35859.4	71918.4	1.20428	0.0526269	0.125001	4.22085	2.07753	up
MW0158464	Tyr-Glu-Thr	酪氨酸-谷氨酸-苏氨酸	Amino acids and derivatives	氨基酸及其衍生物	Amino acids and derivatives	氨基酸及其衍生物	C18H25N3O8	2	0.7026	-	52218.8	36871.4	31900.5	17141.3	18113.1	23942.7	1.208	0.0650282	0.146584	0.48927	-1.0313	down
MW0153136	Lys-Ser-Thr	L-赖氨酸-L-丝氨酸-L-苏氨酸	Amino acids and derivatives	氨基酸及其衍生物	Amino acids and derivatives	氨基酸及其衍生物	C13H26N4O6	2	0.7022	-	18941.3	19415.1	18010.9	125348	156502	137539	1.35187	0.0054861	0.0249058	7.44029	2.89536	up
MW0158352	Tyr-Ala-Glu	酪氨酸-丙氨酸-谷氨酸	Amino acids and derivatives	氨基酸及其衍生物	Amino acids and derivatives	氨基酸及其衍生物	C17H23N3O7	2	0.701	-	15146.8	15030.9	15758.2	59431.4	65127.3	77488.1	1.34722	0.0102247	0.0391465	4.39845	2.137	up
MW0055135	Multifloroside	多花甙	Terpenoids	萜类	Terpene	萜类	C32H38O16	3	0.9995	-	25785.3	37306	19434.3	15383.7	7929.84	7560.38	1.16594	0.0621836	0.141546	0.374113	-1.41845	down
MW0166195	Candicinolide	念珠菌内酯	Others	其它类	Ketone compounds	酮类化合物	C53H75NO12	3	0.998	-	691.91	416.39	341.38	1788.29	3922.91	5399.58	1.26093	0.0901378	0.185533	7.6643	2.93815	up
MW0140100	(3S,4R)-3,4-dihydrophenanthrene-3,4-diol	（+)-顺-3,4-二氢菲-3,4-二醇;顺-3,4-二羟基-3,4-二氢菲	Benzene and substituted derivatives	苯及其衍生物	Benzene and substituted derivatives	苯及其衍生物	C14H12O2	3	0.9834	-	452.87	434.77	738.22	1780.21	3507.04	682.62	1.00968	0.218907	0.353305	3.67182	1.8765	up
MW0151551	Ile-Phe-Tyr	L-异亮氨酸-L-苯丙氨酸-L-酪氨酸	Amino acids and derivatives	氨基酸及其衍生物	Amino acids and derivatives	氨基酸及其衍生物	C24H31N3O5	3	0.9794	-	1738.93	1396.21	4534.35	64621	46887.5	63850.1	1.32017	0.00898992	0.0358109	22.8644	4.51503	up
ZINC49841117	Taxuspine Z	紫杉碱Z	Terpenoids	萜类	Ditepenoids	二萜	C37H51NO9	3	0.9769	-	2454.05	7208.64	8120.11	13167.4	19729.5	16826.1	1.11086	0.0148374	0.0508687	2.79613	1.48343	up
ZINC95911730	3'-O-beta-Glucopyranosyl-stilbericoside	（2S，3R，4S，5S，6R)-2-[（2S，3R，4S，5R，6R)-2-[[（1R，2R，4s，5R，6S，10S)-5，6-二羟基-3，9-二氧杂三环[4.4.0.02，4]癸-7-烯-10-基]氧基]-3，5-二羟基-6-(羟甲基）恶烷-4-基]氧基-6-(羟甲基）恶烷-3，4，5-三醇	Alcohol and amines	醇、胺类	Alcohols	醇类	C20H30O15	3	0.9747	-	585.41	622.31	468.56	632.02	3526.51	3421.2	1.00365	0.173215	0.299806	4.52176	2.17688	up
MW0163380	beta-D-gentiobiosyl crocetin(1-)	β-D-龙胆二糖基藏红花素(1-)	Others	其它类	Lactones	内酯类化合物	C32H43O14-	3	0.9732	-	4308.9	8164.25	4000.08	74480.3	79048.3	70706.1	1.33552	0.000103514	0.00257834	13.6121	3.76681	up
ZINC85610912	Terrestrin E	[3-(3，4-二羟基苯基)-7，8-二羟基-1，2-双[（2-苯基乙酰氧基）二苯并呋喃-4-基]-2-苯乙酸酯	Benzene and substituted derivatives	苯及其衍生物	Benzene and substituted derivatives	苯及其衍生物	C42H30O11	3	0.9722	-	197.24	3072.08	311.61	3337.05	5260.95	4988.68	1.03711	0.0495777	0.120039	3.79418	1.92379	up
MW0164056	(1S,2R,3S,4S,5R,6S)-4-azaniumyl-2-{[azaniumyl(imino)methyl]amino}-3,5,6-trihydroxycyclohexyl phosphate	(1S,2R,3S,4S,5R,6S)-4-azaniumyl-2-{[azaniumyl(imino)methyl]amino}-3,5,6-trihydroxycyclohexyl phosphate	Others	其它类	Others	其它	C7H17N4O7P	3	0.9689	-	16330.3	16926.2	18758.1	36324.6	45602.9	40762.3	1.3333	0.00883091	0.0353911	2.35875	1.23802	up
MW0132733	[(2R,3S,4S,5R,6S)-6-[3,5-dihydroxy-4-[3-(4-hydroxyphenyl)propanoyl]phenoxy]-3,4,5-trihydroxyoxan-2-yl]methyl 3,4,5-trihydroxybenzoate	[(2R,3S,4S,5R,6S)-6-[3,5-二羟基-4-[3-(4-羟基苯基)丙酰基]苯氧基]-3,4,5-三羟基氧杂-2-基]甲基3,4,5-三羟基苯甲酸酯	Benzene and substituted derivatives	苯及其衍生物	Benzene and substituted derivatives	苯及其衍生物	C28H28O14	3	0.9629	-	2301.78	27891.8	5783.24	109599	77374.2	111049	1.18021	0.00408517	0.0204447	8.28374	3.05028	up
ZINC14655552	(4S)-4-(4,8-dimethoxy-9H-pyrido[3,4-b]indol-1-yl)-7,11-dimethoxy-2,3,4,12-tetrahydro-1H-indolo[2,3-a]quinolizin-5-ium	(4S)-4-(4,8-dimethoxy-9H-pyrido[3,4-b]indol-1-yl)-7,11-dimethoxy-2,3,4,12-tetrahydro-1H-indolo[2,3-a]quinolizin-5-ium	Alkaloids	生物碱	Alkaloids	生物碱	C30H29N4O4+	3	0.9586	-	14816.5	16347.1	11581.2	51976.4	48808.5	50544.9	1.33717	8.5409e-05	0.00236279	3.5403	1.82387	up
MW0163125	3-[(1R,2S,3S,4Z,7S,17R)-1-acetyl-8,13,17-tris(2-carboxylatoethyl)-2,7,12,18-tetrakis(carboxylatomethyl)-2,7,17-trimethyl-10,15,21,23-tetrahydro-3H-corrin-3-yl]propanoate	3-[(1R,2S,3S,4Z,7S,17R)-1-乙酰基-8,13,17-三(2-羧基乙基)-2,7,12,18-四(羧基甲基)-2,7 ,17-trimethyl-10,15,21,23-tetrahydro-3H-corrin-3-yl]propanoate	Others	其它类	Lactones	内酯类化合物	C44H44N4O17-8	3	0.9511	-	4078.89	4863.85	6277.44	9574.23	9759.21	16258.7	1.20574	0.0806183	0.170945	2.33848	1.22557	up
MEDP1662	NE,NE,NE-TRIMETHYLLYSINE	NE，NE，NE-三甲基赖氨酸	Amino acids and derivatives	氨基酸及其衍生物	Amino acids and derivatives	氨基酸及其衍生物	C9H20N2O2	3	0.951	-	38071.7	35390.4	39634	99002	111582	99950.4	1.3482	0.00191974	0.0126446	2.74575	1.4572	up
MW0013337	26-Desglucoavenacoside A	26-去葡萄糖基燕麦皂苷 A	Terpenoids	萜类	Triterpene Saponin	三萜皂苷	C45H72O18	3	0.9441	-	23612.6	16656.3	43673.4	11677.3	13407.6	5766.53	1.06681	0.152378	0.272163	0.367531	-1.44406	down
MW0112701	2-(3,4-Dimethoxyphenoxy)-6-[(3,4,5-trihydroxyoxan-2-yl)oxymethyl]oxane-3,4,5-triol	2-(3,4-二甲氧基苯氧基)-6-[(3,4,5-trihydroxyoxan-2-yl)oxymethyl]oxane-3,4,5-triol	Benzene and substituted derivatives	苯及其衍生物	Benzene and substituted derivatives	苯及其衍生物	C19H28O12	3	0.9434	-	1.24366e+06	1.16495e+06	1.23916e+06	348084	369328	384223	1.35257	0.00018161	0.00345218	0.302003	-1.72737	down
MW0154208	N-Acetyl-D-fucosamine	N-乙酰-D-岩藻糖胺；2-乙酰氨基-2，6-二脱氧-D-半乳糖	Alcohol and amines	醇、胺类	Amines	胺类	C8H15NO5	3	0.94	-	71535.7	67406.4	89677.4	17593.3	21182.4	19664.3	1.33977	0.0127143	0.0454152	0.255621	-1.96792	down
ZINC85970028	Thelephantin I	[2，5-双（4-羟基苯基)-4-甲氧基-3，6-二氧代环己-1，4-二烯-1-基]苯甲酸酯	Benzene and substituted derivatives	苯及其衍生物	Benzene and substituted derivatives	苯及其衍生物	C26H18O7	3	0.9339	-	3189.29	1226.45	7111.56	26204.3	31027.8	22576.4	1.22287	0.00243948	0.0146707	6.92343	2.79149	up
MW0163343	(R)-3-sulfolactate	(R)-3-磺基乳酸	Others	其它类	Lactones	内酯类化合物	C3H4O6S-2	3	0.9335	-	1218.37	2548.9	1558.12	53873.7	30066.6	56510.5	1.33335	0.0328873	0.0895687	26.3738	4.72103	up
MW0011753	[4,5-dihydroxy-3,4-bis(hydroxymethyl)-4a,8,8-trimethyl-5,6,7,8a-tetrahydro-1H-naphthalen-1-yl] octanoate	[4,5-dihydroxy-3,4-bis(hydroxymethyl)-4a,8,8-trimethyl-5,6,7,8a-tetrahydro-1H-naphthalen-1-yl] octanoate	Others	其它类	Lactones	内酯类化合物	C23H40O6	3	0.9163	-	35135.6	33643.4	38554.1	70303.4	72020	84596.9	1.33134	0.00763317	0.031769	2.11417	1.08009	up
MW0143128	(2E,4Z)-3-Sulfo-2,4-hexadienedioic acid	3-磺基葡萄糖酸盐	Organic acids	有机酸	Organic acids	有机酸	C6H6O7S	3	0.9106	-	1997.05	2175.82	1991.8	19818.8	19743.8	19835.9	1.35453	2.55683e-07	0.000266836	9.6353	3.26833	up
MW0148175	Deacetylipecoside	去乙酰哌啶糖苷	Alcohol and amines	醇、胺类	Amines	胺类	C25H33NO11	3	0.899	-	199831	173108	160933	818094	831812	856686	1.35013	2.15957e-06	0.000655134	4.69512	2.23116	up
MW0146072	Asp-Cys-Trp	L-天冬氨酰-L-半胱氨酰-L-色氨酸	Amino acids and derivatives	氨基酸及其衍生物	Amino acids and derivatives	氨基酸及其衍生物	C18H22N4O6S1	3	0.8948	-	625.19	459.99	1861.72	129.37	104.77	211.38	1.19121	0.199496	0.331453	0.151183	-2.72564	down
MW0141711	1D-3-amino-1-guanidino-1,3-dideoxy-scyllo-inositol	氨基链胺	Alcohol and amines	醇、胺类	Amines	胺类	C7H16N4O4	3	0.8819	-	14362.1	14281.1	14175.9	32583.8	38957.9	35441.8	1.34639	0.00730686	0.0307257	2.4985	1.32106	up
MW0165357	LL-S490beta	LL-S490beta	Others	其它类	Ketone compounds	酮类化合物	C25H25N3O3	3	0.8741	-	17560.8	12940.9	10773.8	27952.4	34493.1	32647.9	1.27215	0.00302542	0.0168528	2.30387	1.20406	up
MW0166426	6-deoxy-D-gluconate 6-sulfonate	6-脱氧-D-葡萄糖酸盐 6-磺酸盐	Organic acids	有机酸	Organic acids	有机酸	C6H10O9S-2	3	0.8682	-	1072.83	9776.47	254.06	68894.2	71025.4	76713.4	1.19361	9.21232e-05	0.00248671	19.5106	4.28618	up
MW0127818	(1S,3R,4R,5R)-3-[(E)-3-[2-(3,4-dihydroxyphenyl)-7-hydroxy-3-methoxycarbonyl-2,3-dihydro-1-benzofuran-5-yl]prop-2-enoyl]oxy-1,4,5-trihydroxycyclohexane-1-carboxylic acid	(1S,3R,4R,5R)-3-[(E)-3-[2-(3,4-dihydroxyphenyl)-7-hydroxy-3-methoxycarbonyl-2,3-dihydro-1-benzofuran-5-yl]prop-2-enoyl]oxy-1,4,5-trihydroxycyclohexane-1-carboxylic acid	Organic acids	有机酸	Organic acids	有机酸	C26H26O13	3	0.8577	-	439236	416348	464765	208463	200723	241855	1.33271	0.000308464	0.00456793	0.493082	-1.0201	down
MW0139284	Peonidin 3-(6''-acetylglucoside)	芍药花素-3-(6''-乙酰葡萄糖苷）	Flavonoids	黄酮	Anthocyanidins	花青素	C24H25O12+	3	0.8572	-	68244.1	44280.3	71212.5	19389.5	19894.9	18430.4	1.30826	0.0385097	0.100948	0.314117	-1.67063	down
MW0152115	Landomycin J	兰多霉素J	Benzene and substituted derivatives	苯及其衍生物	Benzene and substituted derivatives	苯及其衍生物	C43H54O17	3	0.8523	-	6666.2	6764.8	10578.2	32616.8	35746.3	40563.5	1.32498	0.00143621	0.0108653	4.53688	2.1817	up
ZINC95919335	3',5-Dihydroxy-4',5',6-trimethoxy-7-[6-O-(3-methoxy-4-hydroxybenzoyl)-beta-D-glucopyranosyloxy]isoflavone	4-羟基-3-甲氧基苯甲酸[（2R，3S，4S，5R，6S)-3，4，5-三羟基-6-[5-羟基-3-(3-羟基-4，5-二甲氧基苯基)-6-甲氧基-4-氧代苯并吡喃-7-基]氧基恶烷-2-基]甲酯	Benzene and substituted derivatives	苯及其衍生物	Benzene and substituted derivatives	苯及其衍生物	C32H32O16	3	0.8456	-	22261.8	18958.2	19530.6	282.23	2555.33	1001.88	1.25297	0.000253085	0.00415165	0.0632001	-3.98393	down
MW0167897	Strictosamide ketolactam	去甲酰胺酮内酰胺	Heterocyclic compounds	杂环化合物	Heterocyclic compounds	杂环化合物	C26H30N2O10	3	0.8107	-	102764	113475	112387	410006	428292	439925	1.35294	0.00016535	0.00329736	3.88961	1.95962	up
MW0141373	13-(beta-D-glucosyloxy)docosanoic acid	13-β-D-葡萄糖基氧基二十二烷酸酯	Lipids	脂质	Free fatty acids	游离脂肪酸	C28H54O8	3	0.8048	-	39150.9	28069.2	11309.5	160790	148879	198302	1.26444	0.00312608	0.017208	6.46853	2.69344	up
MW0148008	Cys-Glu-Phe	半胱氨酸-谷氨酸-苯丙氨酸	Amino acids and derivatives	氨基酸及其衍生物	Amino acids and derivatives	氨基酸及其衍生物	C17H23N3O6S1	3	0.7942	-	7521.21	13721.4	16637.8	79989.6	49346.3	40320	1.25144	0.0609741	0.139428	4.47872	2.16309	up
MW0015965	2-[(2E,6E,10Z)-14,15-dihydroxy-11-(hydroxymethyl)-3,7,15-trimethylhexadeca-2,6,10-trienyl]-2,4,6,9-tetrahydroxy-5,7-dimethylphenalene-1,3-dione	2-[(2E,6E,10Z)-14,15-dihydroxy-11-(hydroxymethyl)-3,7,15-trimethylhexadeca-2,6,10-trienyl]-2,4,6,9-tetrahydroxy- 5,7-二甲基苯-1,3-二酮	Phenolic acids	酚酸类	Phenolic acids	酚酸类	C35H46O9	3	0.786	-	11657.3	1521.01	7640.92	206.27	144.74	213.68	1.26645	0.149064	0.268141	0.0271234	-5.20432	down
MW0161276	Estra-1,3,5(10)-triene-3,17-diol	Estra-1,3,5(10)-triene-3,17-diol	Alcohol and amines	醇、胺类	Alcohols	醇类	C18H24O2	3	0.7803	-	16798.1	8793.06	10326.3	24437.8	28409.3	22732.7	1.1981	0.0148309	0.0508687	2.10427	1.07332	up
MW0013186	2-[(7a-Hydroxy-3-oxo-5-propan-2-yl-1,3a,4,5,6,7-hexahydro-2-benzofuran-4-yl)-hydroxymethyl]prop-2-enoic acid	2-[(7a-Hydroxy-3-oxo-5-propan-2-yl-1,3a,4,5,6,7-hexahydro-2-benzofuran-4-yl)-hydroxymethyl]prop-2-enoic酸	Benzene and substituted derivatives	苯及其衍生物	Benzene and substituted derivatives	苯及其衍生物	C15H22O6	3	0.78	-	3278.39	4107.53	7757.04	73378.5	65794.1	57140.4	1.32777	0.00348521	0.0183146	12.964	3.69644	up
MEDN1422	8-Hydroxyeicosa-9,11,14-trienoic acid	8-羟基-9E,11Z,14Z-十八碳三烯酸	Lipids	脂质	Free fatty acids	游离脂肪酸	C20H34O3	3	0.7722	-	43645.3	25098.8	41374.3	96482.9	103706	105355	1.28265	0.00263316	0.0153623	2.77469	1.47233	up
MW0145880	Asn-Pro-Thr	L-天冬酰胺基-L-脯氨酰-L-苏氨酸	Amino acids and derivatives	氨基酸及其衍生物	Amino acids and derivatives	氨基酸及其衍生物	C13H22N4O6	3	0.7655	-	16782.8	14968.9	16970.3	45143.5	47806.4	64080.3	1.32872	0.0247267	0.0731005	3.22299	1.6884	up
ZINC49823208	4,4',4'',7''-Tetramethoxy-1,1':8',1''-terphenanthrene-2,2',2'',7,7'-pentaol	1-(2，7-二羟基-4-甲氧基菲-1-基)-8-(2-羟基-4，7-二甲氧基菲-1-基)-4-甲氧基-2，7-菲二醇	Benzene and substituted derivatives	苯及其衍生物	Benzene and substituted derivatives	苯及其衍生物	C46H34O9	3	0.757	-	5632.11	4672.25	8615.55	18979	16358.3	21086.9	1.27939	0.00248172	0.0148424	2.98227	1.57641	up
MW0106024	(2S)-2-[[(2R,3R)-3-azaniumyl-2-hydroxy-4-phenylbutanoyl]amino]-4-methylpentanoate	(2S)-2-[[(2R,3R)-3-azaniumyl-2-hydroxy-4-phenylbutanoyl]amino]-4-methylpentanoate	Amino acids and derivatives	氨基酸及其衍生物	Amino acids and derivatives	氨基酸及其衍生物	C16H24N2O4	3	0.7569	-	24831.4	27528.6	26943.4	5520.11	2396.14	5845.06	1.29145	0.000152692	0.00318408	0.173527	-2.52676	down
MW0166313	(5S,6E,8Z,11Z,14Z,16E,18R)-5,18-dihydroxyicosa-6,8,11,14,16-pentaenoate	(5S,6E,8Z,11Z,14Z,16E,18R)-5,18-dihydroxyicosa-6,8,11,14,16-pentaenoate	Lipids	脂质	Free fatty acids	游离脂肪酸	C20H29O4-	3	0.7488	-	59180.5	62550.5	58592.1	25269.9	16143.6	37983.2	1.18055	0.0298144	0.0838335	0.440303	-1.18343	down
MW0161684	Thymidine 5'-monophosphate	胸苷 5'-一磷酸	Others	其它类	Others	其它	C10H13N2O8P-2	3	0.747	-	653.66	581.23	806.69	5484.19	12653.2	15362.9	1.31671	0.0706332	0.155656	16.409	4.03642	up
MW0148708	dTDP-2,6-dideoxy-D-kanosamine	dTDP-2，6-二脱氧-D-卡诺胺；DTDP-(3-氨基-2，3，6-三脱氧-alpha-D-阿拉伯-己吡喃糖）酯	Nucleotides and derivatives	核苷酸及其衍生物	Nucleotides and derivatives	核苷酸及其衍生物	C16H27N3O13P2	3	0.7459	-	3070.28	2769.47	5489.84	31148.5	29461	28974.4	1.32808	3.04874e-05	0.00164607	7.90707	2.98314	up
MW0009706	N-[3-[(2-oxo-1-naphthalenylidene)methylamino]phenyl]-2-phenylpropanamide	萨勒米德	Benzene and substituted derivatives	苯及其衍生物	Benzene and substituted derivatives	苯及其衍生物	C26H22N2O2	3	0.7457	-	40152.4	40631.4	42921.1	98500.3	92000.2	94498.9	1.3518	0.000211924	0.00377456	2.30387	1.20406	up
MW0144348	Ac-Val-Ala-Asp-CHO	Ac-Val-Ala-Asp-CHO	Amino acids and derivatives	氨基酸及其衍生物	Amino acids and derivatives	氨基酸及其衍生物	C14H23N3O6	3	0.7457	-	9758.71	7361.28	8759.09	71317.8	74454.7	76221	1.35075	4.32879e-05	0.00183931	8.5781	3.10066	up
MW0166724	4-(Isobutanoyl)sucrose	4-(异丁酰基)蔗糖	Others	其它类	Lactones	内酯类化合物	C16H28O12	3	0.7454	-	28873.4	10581.6	28989.6	37806.9	50403.9	49914.8	1.01671	0.0414373	0.106224	2.01806	1.01297	up
MW0166597	"""cyanidin 3-O-(6""""""""""""""""""""""""""""""""-O-malyl-beta-D-glucoside)"""""""""""	"""矢车菊素 3-O-(6""""""""""""""""""""""""""""""""-O-丙二酰基-beta-D-葡萄糖苷)"""""""""""	Flavonoids	黄酮	Anthocyanidins	花青素	C25H22O15-2	3	0.7443	-	8397.37	8134.75	9027.79	1222.4	2114.98	2076.12	1.32021	7.37862e-05	0.00223998	0.211797	-2.23925	down
MW0165810	1-naphthol 6'-O-malonylglucoside	1-萘酚 6'-O-丙二酰葡萄糖苷	Others	其它类	Lactones	内酯类化合物	C19H19O9-	3	0.7442	-	19019.6	16577.4	19586.8	8570.08	8616.54	4740.81	1.24554	0.00310488	0.0171428	0.397352	-1.33151	down
ZINC14618554	Orixine	奥里克辛	Heterocyclic compounds	杂环化合物	Heterocyclic compounds	杂环化合物	C17H21NO6	3	0.743	-	3704.47	7444.36	8061.37	17811.3	15342.9	24559.3	1.21283	0.0263102	0.0767695	3.00432	1.58704	up
MW0146386	Astragaloside V	黄芪皂苷 V	Terpenoids	萜类	Triterpene Saponin	三萜皂苷	C47H78O19	3	0.7429	-	23777.3	21387.6	24656.7	13425.4	8630.28	6603.86	1.23424	0.00986538	0.0382895	0.410468	-1.28466	down
MW0146061	Asp-Asp-Thr	L-天冬氨酰-L-天冬氨酰-L-苏氨酸	Amino acids and derivatives	氨基酸及其衍生物	Amino acids and derivatives	氨基酸及其衍生物	C12H19N3O9	3	0.742	-	1711.45	3725.26	2566.33	35543.4	37939.7	26332.4	1.32982	0.0114323	0.0422521	12.4722	3.64064	up
MW0167881	8-Glutathionyl-7,17-dihydroxydocosahexaenoic acid	8-谷胱甘肽-7,17-二羟基二十二碳六烯酸	Lipids	脂质	Free fatty acids	游离脂肪酸	C32H47N3O10S	3	0.742	-	412.8	2304.13	1961.7	4105.09	8629.87	4235.8	1.04857	0.0956217	0.193357	3.62729	1.85889	up
MW0145753	Asn-Gly-His	L-天冬酰胺酰-甘氨酰-L-组氨酸	Amino acids and derivatives	氨基酸及其衍生物	Amino acids and derivatives	氨基酸及其衍生物	C12H18N6O5	3	0.7418	-	3181.78	2450.63	9636.4	19049.8	22334.2	12016.9	1.13494	0.0322854	0.0887099	3.49738	1.80627	up
MW0161481	4-Coumaryl-4-coumarate	4-香豆素-4-香豆酸酯	Others	其它类	Lactones	内酯类化合物	C18H16O4	3	0.7413	-	3863.06	222.45	54.75	68719.4	80406.2	81815.9	1.22685	0.00151733	0.0111083	55.7795	5.80166	up
MW0112053	NCGC00381092-01_C15H20O8_2-Acetyl-5-hydroxy-3-methylphenyl beta-D-glucopyranoside	NCGC00381092-01_C15H20O8_2-乙酰基-5-羟基-3-甲基苯基β-D-吡喃葡萄糖苷	Benzene and substituted derivatives	苯及其衍生物	Benzene and substituted derivatives	苯及其衍生物	C15H20O8	3	0.7387	-	15239.2	16604.2	9154.22	27188.8	28572.9	28370	1.21338	0.0213591	0.0656526	2.05211	1.03711	up
MW0142494	2'-N-Acetylparomamine	2-N-乙酰基苯基丙胺	Alcohol and amines	醇、胺类	Amines	胺类	C14H27N3O8	3	0.7386	-	7864.6	3599.04	3470.38	22646.1	14692.2	23211	1.24883	0.0160049	0.0537438	4.05445	2.01951	up
MW0156488	Saccharocin	糖精	Steroids	甾体	Steroid	甾体	C21H40N4O12	3	0.7375	-	356.89	572.76	472.18	34.98	36.33	218.99	1.14297	0.0132401	0.0467359	0.207086	-2.27169	down
MW0165743	6'''-Hydroxyparomomycin	6'''-羟基巴龙霉素	Others	其它类	Others	其它	C23H48N4O15+4	3	0.7348	-	5044.03	585.23	256.71	10888.7	10712.7	8047.85	1.08202	0.0181806	0.058627	5.03727	2.33264	up
MW0147486	Cimigenol	升麻醇	Alcohol and amines	醇、胺类	Alcohols	醇类	C30H48O5	3	0.7335	-	593470	671607	404292	220901	160248	169975	1.28611	0.0364534	0.096649	0.330139	-1.59885	down
pmp001106	Vitexin-2''-O-glucoside	牡荆素-2''-O-葡萄糖苷	Flavonoids	黄酮	Flavones	黄酮	C27H30O16	3	0.7317	-	8053.92	6679.29	5487.83	34097.3	34091.2	34043.4	1.34253	0.000730536	0.00744949	5.05572	2.33792	up
MW0156501	Salbostatin 6'-phosphate	Salbostatin 6'-磷酸盐	Organic acids	有机酸	Organic acids	有机酸	C13H24NO11P	3	0.7315	-	7193.18	10751	13419.4	37093.3	41038.9	35325.4	1.30326	0.000386806	0.00517413	3.6175	1.85499	up
ZINC13431342	Sakambullin	萨坎布兰	Phenolic acids	酚酸类	Phenolic acids	酚酸类	C17H23NO5S	3	0.7312	-	9238.84	9821.02	9739.22	17600.8	27078.3	30474.8	1.27504	0.0565967	0.132018	2.60959	1.38382	up
MW0120525	4-Hydroxy-5-(1,2,3-trihydroxy-3-phenylpropyl)oxolan-2-one	4-Hydroxy-5-(1,2,3-trihydroxy-3-phenylpropyl)oxolan-2-one	Others	其它类	Ketone compounds	酮类化合物	C13H16O6	3	0.7309	-	5319.29	27740	9002.52	29522.2	29163.2	40901.1	1.00046	0.0911221	0.186872	2.36762	1.24344	up
MW0167053	Desacetoxyvindorosine	去乙酰氧基长春罗辛	Alkaloids	生物碱	Alkaloids	生物碱	C22H29N2O3+	3	0.7309	-	129.74	81.24	37.81	365.03	298.37	458.21	1.22483	0.0103862	0.0396015	4.50826	2.17257	up
MW0145532	Arg-Trp-Phe	L-精氨酰-L-色氨酸-L-苯丙氨酸	Amino acids and derivatives	氨基酸及其衍生物	Amino acids and derivatives	氨基酸及其衍生物	C26H33N7O4	3	0.7305	-	3784.03	3767.31	5823.21	15044.3	7438.03	16736.2	1.18042	0.0875236	0.181554	2.93232	1.55204	up
MW0164130	(S)-coclaurinium	(S)-coclaurinium	Heterocyclic compounds	杂环化合物	Heterocyclic compounds	杂环化合物	C17H20NO3+	3	0.7305	-	13844.3	9433.05	17767.2	37600	46361.1	41242.8	1.28331	0.00133094	0.0103268	3.05044	1.60902	up
ZINC14697269	Shancilin	Shancilin	Quinones	醌类	PhenAnthraquinones	菲醌	C30H28O6	3	0.7292	-	1979.06	261.12	447.65	11864.4	12367.2	9607.04	1.24863	0.00110074	0.00935412	12.5895	3.65415	up
MW0163755	2-Hydroxy-1-(3,11,17-trihydroxy-10,13-dimethyl-hexadecahydro-cyclopenta[a]phenanthren-17-yl)-ethanone	2-Hydroxy-1-(3,11,17-trihydroxy-10,13-dimethyl-hexadecahydro-cyclopenta[a]phenanthren-17-yl)-ethanone	Others	其它类	Ketone compounds	酮类化合物	C21H34O5	3	0.7271	-	69708.8	31223.7	75399.1	194059	307400	212551	1.24259	0.0241103	0.071735	4.04925	2.01765	up
MW0105955	Aspartylhistidyllysine	天冬氨酰组氨酰赖氨酸	Amino acids and derivatives	氨基酸及其衍生物	Amino acids and derivatives	氨基酸及其衍生物	C16H26N6O6	3	0.7266	-	5373.33	5141.51	2513.45	26163.7	30996.6	28136.9	1.31125	0.000338458	0.00475564	6.54707	2.71085	up
MW0104353	2-(5,6-Dihydroxy-3-methoxycarbonylcyclohex-3-en-1-yl)oxypropanoic acid	2-(5,6-Dihydroxy-3-methoxycarbonylcyclohex-3-en-1-yl)oxypropanoic acid	Organic acids	有机酸	Organic acids	有机酸	C11H16O7	3	0.7258	-	160.64	1001.26	100.85	8141.15	8360.61	9270.16	1.25893	6.76605e-05	0.00214515	20.4094	4.35116	up
MW0163905	2-Imino-3-(indol-3-yl)propanoate	2-亚氨基-3-(吲哚-3-基)丙酸酯	Others	其它类	Lactones	内酯类化合物	C11H9N2O2-	3	0.7255	-	1822.35	1340.1	2444.8	1207.44	600.29	807.83	1.11594	0.0689208	0.152763	0.46646	-1.10017	down
MW0164830	(5S)-1-(3,4-dihydroxyphenyl)-5-hydroxydecan-3-one	(5S)-1-(3,4-二羟基苯基)-5-羟基癸-3-酮	Benzene and substituted derivatives	苯及其衍生物	Benzene and substituted derivatives	苯及其衍生物	C16H24O4	3	0.7221	-	2029.45	1108.43	1484.38	25951.6	29010	25829	1.3446	0.00093223	0.00858397	17.4786	4.12752	up
ZINC95911667	Glochidacuminoside C	[（2R，3S，4S，5R，6S)-3，4，5-三羟基-6-[2-[（4S)-4-羟基环己烯-1-基]乙酰基]氧基恶烷-2-基]甲基2-[（4S)-4-羟基环己烯-1-基]乙酸酯	Others	其它类	Lactones	内酯类化合物	C22H32O10	3	0.7209	-	6657.63	3981.54	10903.4	3736.07	1197.5	2446.09	1.05374	0.131906	0.245357	0.342561	-1.54557	down
MW0166837	(3R,4S,9R,11R)-29-(4-hydroxyphenyl)-3-methoxy-4-methylnonacosane-9,11-diol	(3R,4S,9R,11R)-29-(4-hydroxyphenyl)-3-methoxy-4-methylnonacosane-9,11-diol	FA	脂肪酰类	Others	其它	C37H68O4	3	0.7181	-	20244.8	4317.15	30265.3	71702	42417.2	53401.7	1.01034	0.0307634	0.0857971	3.05543	1.61138	up
MW0157934	Tiliacorine	替利考林	Lignans and Coumarins	木脂素和香豆素	Lignans	木脂素	C36H36N2O5	3	0.7164	-	29122.8	30529.8	37052.7	10123.4	8552.4	13545.4	1.30627	0.00351121	0.0183787	0.33319	-1.58558	down
MW0054838	Methyl 3,15,21-tris[[3,4,5-trihydroxy-6-(hydroxymethyl)oxan-2-yl]oxy]docosanoate	3,15,21-tris[[3,4,5-trihydroxy-6-(hydroxymethyl)oxan-2-yl]oxy] docosanoate 甲酯	FA	脂肪酰类	Others	其它	C41H76O20	3	0.7149	-	2152.06	1391.71	1801.35	295.21	1100.34	877.46	1.02321	0.034983	0.0937833	0.42525	-1.23362	down
MW0151739	Inosine-5'-carboxylate	5'-肌苷羧酸盐	Organic acids	有机酸	Organic acids	有机酸	C11H12N4O7	3	0.7149	-	5542.91	7389.41	5308.47	2510.96	1934.84	1345.72	1.27597	0.0113851	0.0421497	0.317504	-1.65515	down
ZINC14859623	(2S,12R)-5-hydroxy-6,8,8,10,10-pentamethyl-2,12-diphenyl-3,12-dihydro-2H-pyrano[2,3-a]xanthene-4,9,11-trione	（2S，12R)-5-羟基-6，8，8，10，10-五甲基-2，12-二苯基-3，12-二氢-2H-吡喃并[2，3-a]]吨-4，9，11-三酮	Others	其它类	Ketone compounds	酮类化合物	C33H30O6	3	0.7149	-	35559.4	33929.5	39814.3	16074.9	16809	19666.4	1.32577	0.00174246	0.0119997	0.480775	-1.05657	down
MW0014313	4-(3-Acetyl-2,6-dihydroxyphenyl)-2-methoxy-4-[3,4,5-trihydroxy-6-(hydroxymethyl)oxan-2-yl]oxybutanoic acid	4-(3-Acetyl-2,6-dihydroxyphenyl)-2-methoxy-4-[3,4,5-trihydroxy-6-(hydroxymethyl)oxan-2-yl]oxybutanoic acid	Organic acids	有机酸	Organic acids	有机酸	C19H26O12	3	0.714	-	38295.7	16290.3	30691.2	12134.4	12970.7	11317.6	1.13404	0.12686	0.23815	0.42711	-1.22732	down
MW0148723	dTDP-D-ravidosamine	dTDP-D-拉维多胺	Nucleotides and derivatives	核苷酸及其衍生物	Nucleotides and derivatives	核苷酸及其衍生物	C18H31N3O14P2	3	0.7135	-	2953.41	7526.01	1619.04	8111.05	10736.2	12177.6	1.04745	0.0505024	0.121509	2.56437	1.3586	up
MW0141858	2-(2-Carboxy-4-methylthiazol-5-yl)ethyl phosphate	2-(2-Carboxy-4-methylthiazol-5-yl) 磷酸乙酯	Organic acids	有机酸	Organic acids	有机酸	C7H10NO6PS	3	0.7113	-	15389.9	12877.3	11079.3	4170.23	4467.16	3604.66	1.32969	0.0156142	0.0527587	0.311135	-1.68439	down
MW0119330	2-[4-(2-Oxo-1,3-Oxazolidin-3-Yl)phenyl]-3,4-Dihydroquinazolin-4-One	2-[4-(2-氧代-1,3-恶唑啉-3-Yl)苯基]-3,4-二氢喹唑啉-4-	Others	其它类	Ketone compounds	酮类化合物	C17H13N3O3	3	0.7086	-	9886.52	9546.81	2795.74	844.15	2139.14	1857.79	1.11237	0.124961	0.235539	0.217781	-2.19905	down
ZINC85921674	[4-[(3S)-3,4-dimethylpentanoyl]oxy-2,5-dihydroxy-3,6-bis(4-hydroxyphenyl)phenyl] 4-hydroxybenzoate	[4-[（3S)-3，4-二甲基戊酰基]氧-2，5-二羟基-3，6-双（4-羟基苯基）苯基]-4-羟基苯甲酸酯	Benzene and substituted derivatives	苯及其衍生物	Benzene and substituted derivatives	苯及其衍生物	C32H30O9	3	0.7079	-	4385.29	6046.85	5466.84	130.93	823.69	177.36	1.2631	0.00354082	0.0184742	0.0711983	-3.81201	down
MW0123076	methyl 4-[(2,4-diamino-7-oxo-8H-pteridin-6-yl)methyl-methylamino]benzoate	4-[(2,4-二氨基-7-氧代-8H-蝶啶-6-基)甲基-甲氨基]苯甲酸甲酯	Organic acids	有机酸	Organic acids	有机酸	C16H17N7O3	3	0.7074	-	19164.6	18811.3	29200.4	121440	63175.9	51831.8	1.21832	0.116889	0.224032	3.51981	1.8155	up
MW0105503	Alanylaspartylarginine	Ala Asp Arg	Amino acids and derivatives	氨基酸及其衍生物	Amino acids and derivatives	氨基酸及其衍生物	C13H24N6O6	3	0.7062	-	6292.19	6891.34	3040.8	23232.9	20130.5	40316.8	1.25597	0.0650975	0.146689	5.1577	2.36673	up
MW0001721	2-[[1-(4-Nitrobenzoyl)pyrrolidine-2-carbonyl]amino]benzoic acid	2-[[1-(4-硝基苯甲酰基)吡咯烷-2-羰基]氨基]苯甲酸	Benzene and substituted derivatives	苯及其衍生物	Benzene and substituted derivatives	苯及其衍生物	C19H17N3O6	3	0.7061	-	13729.9	12261.9	12190.1	923.89	2529.25	3387	1.24613	0.000537953	0.00620937	0.179146	-2.48079	down
MW0103905	[(1S,2R,4S,5R,6S,7S,8R,9R,12R)-7,12-diacetyloxy-6-(acetyloxymethyl)-5-benzoyloxy-2,10,10-trimethyl-4-octanoyloxy-11-oxatricyclo[7.2.1.01,6]dodecan-8-yl] benzoate	[(1S,2R,4S,5R,6S,7S,8R,9R,12R)-7,12-diacetyloxy-6-(acetyloxymethyl)-5-benzoyloxy-2,10,10-trimethyl-4-octanoyloxy-11-oxatricyclo[7.2.1.01,6]dodecan-8-yl] benzoate	Benzene and substituted derivatives	苯及其衍生物	Benzene and substituted derivatives	苯及其衍生物	C43H54O13	3	0.7058	-	1428.13	1770.89	2063.13	3487.91	5895.91	6409.81	1.25589	0.0547903	0.128915	3.00136	1.58562	up
MW0105833	Asparagylprolyllysine	Asn Pro Lys	Amino acids and derivatives	氨基酸及其衍生物	Amino acids and derivatives	氨基酸及其衍生物	C15H27N5O5	3	0.7035	-	3729.85	3179.68	1625.99	1200	234.78	666.43	1.11035	0.0590822	0.136129	0.246172	-2.02226	down
MW0163684	8-(Methylthio)-2-oxooctanoate	8-(甲硫基)-2-氧代辛酸酯	Others	其它类	Lactones	内酯类化合物	C9H15O3S-	3	0.7019	-	1804.69	2110.38	1565.3	3982.67	2224.82	6961.77	1.01985	0.203608	0.336038	2.40299	1.26483	up
MEDP1673	Ile-ile-thr	异亮氨酸-异亮氨酸-苏氨酸	Amino acids and derivatives	氨基酸及其衍生物	Amino acids and derivatives	氨基酸及其衍生物	C16H31N3O5	3	0.7004	-	50242.8	45217.8	15897.5	8166.79	7563.93	5358.96	1.21312	0.105857	0.209235	0.189386	-2.4006	down
MW0151069	His-Pro-Trp	L-组氨酸-L-脯氨酸-L-色氨酸	Amino acids and derivatives	氨基酸及其衍生物	Amino acids and derivatives	氨基酸及其衍生物	C22H26N6O4	3	0.6999	-	15205.7	18238.7	15626.4	71657.9	90979.2	79743.9	1.34665	0.00627493	0.0273449	4.93942	2.30434	up
MW0162234	N(4)-(beta-N-acetyl-D-glucosaminyl)-L-asparagine zwitterion	N(4)-(β-N-乙酰基-D-氨基葡萄糖)-L-天冬酰胺两性离子	Others	其它类	Lactones	内酯类化合物	C12H21N3O8	3	0.6988	-	11584.5	19833.2	16174.3	50010.4	53487.7	49682.2	1.30978	0.000993081	0.00887935	3.21861	1.68644	up
MW0146160	Asp-Ile-Tyr	L-天冬氨酰-L-异亮氨酰-L-酪氨酸	Amino acids and derivatives	氨基酸及其衍生物	Amino acids and derivatives	氨基酸及其衍生物	C19H27N3O7	3	0.6979	-	1677.37	911.98	872.82	6368.42	9559.37	4715.89	1.2872	0.0522029	0.124357	5.96264	2.57595	up
MW0149790	Gln-Pro-Glu	谷酰氨-脯氨酸-谷氨酸	Amino acids and derivatives	氨基酸及其衍生物	Amino acids and derivatives	氨基酸及其衍生物	C15H24N4O7	3	0.6979	-	129237	125403	119406	434802	498133	514160	1.35025	0.00412518	0.0205876	3.86876	1.95187	up
MW0150899	His-Gln-Gly	组氨酸-谷酰胺-甘氨酸	Amino acids and derivatives	氨基酸及其衍生物	Amino acids and derivatives	氨基酸及其衍生物	C13H20N6O5	3	0.6978	-	70328.9	50741.9	88105.7	329928	351448	350831	1.32879	8.78936e-05	0.00241095	4.93462	2.30294	up
ZINC95918804	(2R,3R,4S,5S,6R)-2-[3-[2-(3,4-dimethoxyphenyl)-7-methoxy-1-benzofuran-5-yl]propoxy]-6-[[(2S,3R,4S,5R)-3,4,5-trihydroxyoxan-2-yl]oxymethyl]oxane-3,4,5-triol	（2R，3R，4S，5S，6R)-2-[3-[2-(3，4-二甲氧基苯基)-7-甲氧基-1-苯并呋喃-5-基]丙氧基]-6-[[（2S，3R，4S，5R)-3，4，5-三羟基恶烷-2-基]氧甲基]恶烷-3，4，5-三醇	Benzene and substituted derivatives	苯及其衍生物	Benzene and substituted derivatives	苯及其衍生物	C31H40O14	3	0.6977	-	37137.1	10871.7	23820.9	58034.5	71704.4	63333.4	1.13024	0.017697	0.0574982	2.68792	1.42649	up
MW0161005	(2S)-2-azaniumyl-3-[4-(4-hydroxyphenoxy)phenyl]propanoate	(2S)-2-azaniumyl-3-[4-(4-hydroxyphenoxy)phenyl]propanoate	Others	其它类	Lactones	内酯类化合物	C15H15NO4	3	0.6972	-	2090.26	3020.23	7061.98	9649.34	15428.9	16161	1.16423	0.0225184	0.0684902	3.38791	1.76039	up
MW0012491	15-OxoEDE	15-氧合EDE	Lipids	脂质	Free fatty acids	游离脂肪酸	C20H34O3	3	0.6968	-	65797.4	69196.1	69676.1	166968	361585	186451	1.25535	0.110714	0.215948	3.49345	1.80465	up
MW0109833	2-Amino-5-carbamimidoylsulfanylpentanoic acid	2-Amino-5-carbamidoylsulfanylpentanoic 酸	Amino acids and derivatives	氨基酸及其衍生物	Amino acids and derivatives	氨基酸及其衍生物	C6H13N3O2S	3	0.6965	-	6039.72	12134.9	5732.32	3006.07	3955.1	3525.97	1.12913	0.162957	0.287096	0.438665	-1.18881	down
MW0156930	Ser-Thr-Phe	丝氨酰-苏氨酰-苯丙氨酸	Amino acids and derivatives	氨基酸及其衍生物	Amino acids and derivatives	氨基酸及其衍生物	C16H23N3O6	3	0.6943	-	88406.4	82213.9	82544.8	187026	196055	196338	1.35171	2.73866e-05	0.00158964	2.2887	1.19453	up
MW0157629	Thr-Glu-Gly	苏氨酸-谷氨酸-甘氨酸	Amino acids and derivatives	氨基酸及其衍生物	Amino acids and derivatives	氨基酸及其衍生物	C11H19N3O7	3	0.6943	-	132096	124080	216874	89666.1	50264.1	12649.9	1.01632	0.0492926	0.119616	0.322545	-1.63243	down
MW0158638	Tyr-Trp-His	酪氨酸-色氨酸-组氨酸	Amino acids and derivatives	氨基酸及其衍生物	Amino acids and derivatives	氨基酸及其衍生物	C26H28N6O5	3	0.6912	-	22460.8	14145.5	21174.7	7095.79	5081.49	5853.99	1.29716	0.0308016	0.08583	0.312062	-1.68009	down
MW0157820	Thr-Thr-Ser	苏氨酸-苏氨酸-丝氨酸	Amino acids and derivatives	氨基酸及其衍生物	Amino acids and derivatives	氨基酸及其衍生物	C11H21N3O7	3	0.6909	-	1409.33	538.25	2169.24	6912.65	6313.62	3186.96	1.13711	0.0552876	0.129756	3.98687	1.99526	up
MW0109328	Pro-Met-Lys	脯氨酰-甲硫氨酰-赖氨酸	Amino acids and derivatives	氨基酸及其衍生物	Amino acids and derivatives	氨基酸及其衍生物	C16H30N4O4S1	3	0.6895	-	12274.1	15665.2	39793.5	281275	312850	291232	1.30963	2.93071e-05	0.00164607	13.0713	3.70833	up
MW0108081	Lysyltryptophyllysine	赖氨酰色氨酸赖氨酸	Amino acids and derivatives	氨基酸及其衍生物	Amino acids and derivatives	氨基酸及其衍生物	C23H36N6O4	3	0.6891	-	19371.2	22306	19089	38345.2	61451.4	43166.3	1.27572	0.0572883	0.133297	2.35268	1.2343	up
MW0157772	Thr-Phe-Tyr	苏氨酸-苯丙氨酸-酪氨酸	Amino acids and derivatives	氨基酸及其衍生物	Amino acids and derivatives	氨基酸及其衍生物	C22H27N3O6	3	0.689	-	21183	23663.1	23464.9	57512.6	54856.8	53441.2	1.34913	6.57272e-05	0.00212651	2.42729	1.27935	up
MW0014331	NCGC00380171-01_C20H28O11_Pentanedioic acid, 3-hydroxy-3-methyl-, [4-(beta-D-glucopyranosyloxy)phenyl]methyl methyl ester	NCGC00380171-01_C20H28O11_戊二酸，3-羟基-3-甲基-，[4-(β-D-吡喃葡萄糖基氧基)苯基]甲基甲酯	Benzene and substituted derivatives	苯及其衍生物	Benzene and substituted derivatives	苯及其衍生物	C20H28O11	3	0.6887	-	76801.2	56994.3	54104.2	17203	14578.9	14342.4	1.33438	0.0206014	0.0639283	0.245473	-2.02636	down
MW0155954	Pro-Phe-Asn	脯氨酰-苯丙氨酰-天冬酰胺	Amino acids and derivatives	氨基酸及其衍生物	Amino acids and derivatives	氨基酸及其衍生物	C18H24N4O5	3	0.6885	-	2590.89	4729.51	9763.27	15239.9	10206.8	17234.8	1.0582	0.0458798	0.113755	2.49838	1.32099	up
MW0162041	Hexahomomethionine	六高蛋氨酸	Organic acids	有机酸	Organic acids	有机酸	C11H23NO2S	3	0.6885	-	15654.6	17460.7	13291.6	4145.29	7932.82	5628.97	1.25339	0.00436072	0.021315	0.381562	-1.39001	down
MW0126898	Tubastatin A	Tubastatin A	Heterocyclic compounds	杂环化合物	Heterocyclic compounds	杂环化合物	C20H21N3O2	3	0.6885	-	21701.4	19605.1	14948.9	47930.7	46548.8	63134.9	1.30252	0.0147347	0.0506025	2.80177	1.48634	up
MW0156841	Ser-Lys-Gly	丝氨酸-赖氨酸-甘氨酸	Amino acids and derivatives	氨基酸及其衍生物	Amino acids and derivatives	氨基酸及其衍生物	C11H22N4O5	3	0.6876	-	166493	165453	195977	56222.8	100040	40660.4	1.20647	0.0108962	0.0409457	0.373014	-1.4227	down
MW0148282	deoxylimonoic acid D-ring-lactone	脱氧柠檬苦素-D-环内酯	Others	其它类	Ketone compounds	酮类化合物	C26H34O9	3	0.6876	-	34629.5	38116.6	37444.6	4343.5	1011.35	3180.77	1.28836	2.10692e-05	0.00138355	0.0774623	-3.69036	down
MW0151049	His-Phe-Met	组氨酸-苯丙氨酸-蛋氨酸	Amino acids and derivatives	氨基酸及其衍生物	Amino acids and derivatives	氨基酸及其衍生物	C20H27N5O4S1	3	0.6873	-	15165	2931.55	3547.87	19846.8	17269.1	21515.3	1.04902	0.0792133	0.16873	2.70883	1.43767	up
MW0160934	4-Amino-4-deoxychorismate(2-)	4-氨基-4-脱氧分支酸(2-)	Organic acids	有机酸	Organic acids	有机酸	C10H9NO5-2	3	0.6873	-	1700.81	2873.22	2223.84	1303.52	1334.15	482.98	1.02623	0.0512881	0.122788	0.459063	-1.12324	down
MEDP1246	2,4-diacetamino-2,4,6-triphenoxy-D-mannopyranose	2,4-二乙酰氨基-2,4,6-三苯氧基-D-甘露吡喃糖	Others	其它类	Saccharides	糖类	C10H18N2O5	3	0.687	-	923.01	253.29	460.16	3478.85	7051.27	5791.46	1.27539	0.0387157	0.101325	9.97371	3.31813	up
MW0148082	Cys-Tyr-Asp	半胱氨酸-酪氨酸-天门冬氨酸	Amino acids and derivatives	氨基酸及其衍生物	Amino acids and derivatives	氨基酸及其衍生物	C16H21N3O7S1	3	0.6867	-	293729	265259	262643	65873.1	73690.9	83069.8	1.34599	0.000426173	0.00548624	0.270965	-1.88382	down
MW0155362	Phe-Thr-Tyr	苯丙氨酰-苏氨酰-酪氨酸	Amino acids and derivatives	氨基酸及其衍生物	Amino acids and derivatives	氨基酸及其衍生物	C22H27N3O6	3	0.6862	-	110770	107767	101220	368232	225268	215795	1.26384	0.0799732	0.169904	2.53097	1.33969	up
MW0155946	Pro-Met-Met	脯氨酰-甲硫氨酰-甲硫氨酸	Amino acids and derivatives	氨基酸及其衍生物	Amino acids and derivatives	氨基酸及其衍生物	C15H27N3O4S2	3	0.6861	-	4258.72	9510.11	7039.73	43816.9	66888.1	71876.8	1.31323	0.0220122	0.0672732	8.77436	3.13329	up
MW0158124	Trp-Cys-Phe	色氨酸-半胱氨酸-苯丙氨酸	Amino acids and derivatives	氨基酸及其衍生物	Amino acids and derivatives	氨基酸及其衍生物	C23H26N4O4S1	3	0.6857	-	38940.3	36319.4	43084.8	74956	80576.4	81485.9	1.33775	0.000154685	0.00319241	2.00278	1.00201	up
MW0158240	Trp-Ser-His	色氨酸-丝氨酸-组氨酸	Amino acids and derivatives	氨基酸及其衍生物	Amino acids and derivatives	氨基酸及其衍生物	C20H24N6O5	3	0.685	-	16896.7	13389.2	10010.3	25182	42354.9	33676.5	1.22925	0.0401806	0.103945	2.51173	1.32868	up
ZINC95911798	Grossamide K	（E)-3-[（2R，3S)-2-(4-羟基-3-甲氧基苯基)-3-(羟甲基)-7-甲氧基-2，3-二氢-1-苯并呋喃-5-基]-N-[2-(4-羟基苯基）乙基]丙-2-烯酰胺	Alcohol and amines	醇、胺类	Amines	胺类	C28H29NO7	3	0.6835	-	131854	105045	143245	30219.3	32283.4	26576	1.33986	0.0119749	0.0437353	0.234329	-2.09339	down
MW0150940	His-Gly-Leu	组氨酸-甘氨酸-亮氨酸	Amino acids and derivatives	氨基酸及其衍生物	Amino acids and derivatives	氨基酸及其衍生物	C14H23N5O4	3	0.6831	-	13507.7	5457.33	14645.8	55.86	3151.71	484.37	1.07497	0.0625408	0.142286	0.109844	-3.18647	down
ZINC85643397	Albibrissinoside A	白蕊草苷A	Heterocyclic compounds	杂环化合物	Heterocyclic compounds	杂环化合物	C29H38O17	3	0.6828	-	45793.7	18273.1	52184.3	84420.6	92072.8	104241	1.11503	0.0175716	0.0572968	2.4149	1.27196	up
MW0156632	Ser-Ala-Thr	L-丝氨酰-L-丙氨酰-L-苏氨酸	Amino acids and derivatives	氨基酸及其衍生物	Amino acids and derivatives	氨基酸及其衍生物	C10H19N3O6	3	0.6816	-	5563.35	27848.1	29329.6	57977.7	70181	72457.6	1.0634	0.0117794	0.0431424	3.19753	1.67696	up
MW0163023	trans-zeatin-O-glucoside-7-N-glucoside	反式玉米素-O-葡萄糖苷-7-N-葡萄糖苷	Alcohol and amines	醇、胺类	Alcohols	醇类	C22H33N5O11	3	0.6793	-	3072.35	3050.34	2979.26	38670.8	46547.2	46157.6	1.35354	0.00392753	0.0198535	14.4338	3.85138	up
MW0144620	Ala-Ile-Met	L-丙氨酰-L-异亮氨酰-L-蛋氨酸	Amino acids and derivatives	氨基酸及其衍生物	Amino acids and derivatives	氨基酸及其衍生物	C14H27N3O4S1	3	0.6789	-	10453	3378.39	10393.8	24482.5	25774.5	29772.2	1.17201	0.00433529	0.0212708	3.30355	1.72402	up
MW0153724	Met-Val-Val	甲硫氨酰-缬氨酰-缬氨酸	Amino acids and derivatives	氨基酸及其衍生物	Amino acids and derivatives	氨基酸及其衍生物	C15H29N3O4S1	3	0.6764	-	26448.7	20719	25761.4	62607.5	60088.1	70155.2	1.33225	0.000982063	0.00884623	2.64436	1.40292	up
MW0156481	S-4-benzyl-3-isobutyryl-5,5-dimethyloxazolidin-2-one	S-4-苄基-3-异丁酰基-5,5-二甲基恶唑烷-2-	Benzene and substituted derivatives	苯及其衍生物	Benzene and substituted derivatives	苯及其衍生物	C16H21NO3	3	0.6755	-	9667.65	8487.85	9705.54	41262.8	33820.9	36270.1	1.34739	0.00494452	0.0231754	3.99675	1.99883	up
MW0105520	Alanylisoleucyllysine	丙氨酰异亮氨酰赖氨酸	Amino acids and derivatives	氨基酸及其衍生物	Amino acids and derivatives	氨基酸及其衍生物	C15H30N4O4	3	0.6753	-	6178.78	7328.47	5016.53	13844.1	23198.1	23677.2	1.27749	0.0430529	0.109102	3.27792	1.71278	up
MW0151411	Ile-Glu-Asn	L-异亮氨酸-L-谷氨酸-L-天冬酰胺	Amino acids and derivatives	氨基酸及其衍生物	Amino acids and derivatives	氨基酸及其衍生物	C15H26N4O7	3	0.6746	-	56134.2	18889.5	58237.2	218043	255081	266156	1.25353	0.000519184	0.00612562	5.54762	2.47187	up
MW0152430	Leu-Met-Cys	L-亮氨酸-L-蛋氨酸-L-半胱氨酸	Amino acids and derivatives	氨基酸及其衍生物	Amino acids and derivatives	氨基酸及其衍生物	C14H27N3O4S2	3	0.6738	-	23676.7	23712.6	49906.8	2372.77	3185.15	2520.96	1.32394	0.0764216	0.164891	0.083034	-3.59015	down
MW0158425	Tyr-Cys-Ser	酪氨酸-半胱氨酸-丝氨酸	Amino acids and derivatives	氨基酸及其衍生物	Amino acids and derivatives	氨基酸及其衍生物	C15H21N3O6S1	3	0.6738	-	3733	2372.03	3131.54	51016	51676.7	53227.2	1.34901	3.44374e-06	0.00084365	16.8807	4.0773	up
MW0146207	Asp-Met-His	L-天冬氨酰-L-甲硫氨酰-L-组氨酸	Amino acids and derivatives	氨基酸及其衍生物	Amino acids and derivatives	氨基酸及其衍生物	C15H23N5O6S	3	0.6729	-	45788.6	37320.3	37926.7	15182.5	9720.9	14725.4	1.30527	0.00217657	0.0135665	0.327414	-1.61081	down
MW0164800	2-[(Z)-2-carboxyethenyl]-4,5-dihydroxyphenolate	2-[(Z)-2-羧基乙烯基]-4,5-二羟基苯酚	Others	其它类	Others	其它	C9H7O5-	3	0.6724	-	2979.93	2582.13	2072.06	10167.2	8439.18	6890.55	1.31243	0.0183899	0.0589512	3.33987	1.73979	up
MEDP1677	Trp-Ala-Asp	色氨酸-丙氨酸-天冬氨酸	Amino acids and derivatives	氨基酸及其衍生物	Amino acids and derivatives	氨基酸及其衍生物	C18H22N4O6	3	0.6719	-	31470.9	17490.3	21351.5	209663	209772	183814	1.33705	0.000434014	0.00550064	8.57951	3.1009	up
MW0158144	Trp-Glu-His	色氨酸-谷氨酸-组氨酸	Amino acids and derivatives	氨基酸及其衍生物	Amino acids and derivatives	氨基酸及其衍生物	C22H26N6O6	3	0.6715	-	29222.8	27908.6	31176.5	174983	173809	194274	1.35304	0.00159427	0.0114019	6.14969	2.62051	up
MW0150878	His-Asp-Trp	组氨酸-天门冬氨酸-色氨酸	Amino acids and derivatives	氨基酸及其衍生物	Amino acids and derivatives	氨基酸及其衍生物	C21H24N6O6	3	0.6715	-	127648	118276	114065	323759	354044	367064	1.34899	0.00151111	0.0110835	2.9025	1.5373	up
MW0158410	Tyr-Asp-Glu	酪氨酸-天冬氨酸-谷氨酸	Amino acids and derivatives	氨基酸及其衍生物	Amino acids and derivatives	氨基酸及其衍生物	C18H23N3O9	3	0.671	-	56954.9	7198.54	16757	93764.2	90398.5	91041.9	1.07646	0.050588	0.12158	3.40135	1.76611	up
MW0155207	Phe-His-Glu	苯丙氨酰-组氨酰-谷氨酸	Amino acids and derivatives	氨基酸及其衍生物	Amino acids and derivatives	氨基酸及其衍生物	C20H25N5O6	3	0.6707	-	13416.7	12042.6	11531.1	30281.4	27853.9	28452	1.345	8.87638e-05	0.00242459	2.3408	1.227	up
MW0159126	Val-Phe-Phe	缬氨酸-苯丙氨酸-苯丙氨酸	Amino acids and derivatives	氨基酸及其衍生物	Amino acids and derivatives	氨基酸及其衍生物	C23H29N3O4	3	0.6681	-	145960	145642	146463	334434	350538	370240	1.35193	0.00251224	0.0149835	2.4088	1.26831	up
MW0150394	Gly-Ile-Tyr	甘氨酸-异亮氨酸-酪氨酸	Amino acids and derivatives	氨基酸及其衍生物	Amino acids and derivatives	氨基酸及其衍生物	C17H25N3O5	3	0.6681	-	51186.6	18757.7	32197.5	78168.2	73356.7	69387.4	1.11674	0.0440426	0.110506	2.1628	1.1129	up
MW0144513	Ala-Asp-His	L-丙氨酰-L-天冬氨酰-L-组氨酸	Amino acids and derivatives	氨基酸及其衍生物	Amino acids and derivatives	氨基酸及其衍生物	C13H19N5O6	3	0.6663	-	10575	14419.2	9456.35	1284.64	945.12	3002.43	1.27116	0.0126705	0.0453583	0.151875	-2.71904	down
MW0158629	Tyr-Thr-Thr	酪氨酸-苏氨酸-苏氨酸	Amino acids and derivatives	氨基酸及其衍生物	Amino acids and derivatives	氨基酸及其衍生物	C17H25N3O7	3	0.6663	-	1276.23	407.34	1255.83	4091.72	5186.05	5763.2	1.23596	0.00450861	0.0217889	5.11702	2.3553	up
MW0146307	Asp-Tyr-Phe	L-天冬氨酰-L-酪氨酰-L-苯丙氨酸	Amino acids and derivatives	氨基酸及其衍生物	Amino acids and derivatives	氨基酸及其衍生物	C22H25N3O7	3	0.6658	-	6627.42	12706.9	11327	23158.6	28727.3	30345.3	1.24687	0.00415758	0.0207114	2.68192	1.42327	up
MW0144463	Ala-Ala-Thr	L-丙氨酰-L-丙氨酰-L-苏氨酸	Amino acids and derivatives	氨基酸及其衍生物	Amino acids and derivatives	氨基酸及其衍生物	C10H19N3O5	3	0.6652	-	15072.8	10224.4	10719.1	30551.2	30561.7	33910.9	1.31163	0.0007829	0.00765359	2.63836	1.39964	up
MW0155379	Phe-Tyr-Gln	苯丙氨酰-酪氨酰-谷氨酰胺	Amino acids and derivatives	氨基酸及其衍生物	Amino acids and derivatives	氨基酸及其衍生物	C23H28N4O6	3	0.6647	-	1325.79	1846.83	1529.6	16131.9	17612.4	17526.7	1.35034	0.000358416	0.00493657	10.9036	3.44673	up
MW0160892	Anhydroerythromycin	脱水红霉素	Others	其它类	Ketone compounds	酮类化合物	C37H65NO12	3	0.6647	-	397163	247407	206743	142240	113351	127586	1.19365	0.111642	0.217171	0.450101	-1.15168	down
MW0149067	Eudesobovatol B	欧德索博瓦托尔B	Alcohol and amines	醇、胺类	Alcohols	醇类	C33H44O4	3	0.6646	-	14217	2927.29	5660.4	18970.8	16840	19613.4	1.03555	0.0778165	0.166684	2.43039	1.28119	up
MW0150539	Gly-Val-Tyr	甘氨酸-缬氨酸-酪氨酸	Amino acids and derivatives	氨基酸及其衍生物	Amino acids and derivatives	氨基酸及其衍生物	C16H23N3O5	3	0.6603	-	7065.04	6295.09	6067.27	12952.1	15315.4	13713.1	1.3347	0.0032473	0.0176363	2.16089	1.11163	up
MW0151099	His-Thr-Met	L-组氨酸-L-苏氨酸-L-蛋氨酸	Amino acids and derivatives	氨基酸及其衍生物	Amino acids and derivatives	氨基酸及其衍生物	C15H25N5O5S1	3	0.66	-	67922.9	70810.2	57111.4	233541	220284	238780	1.34668	3.20203e-05	0.00167509	3.5365	1.82232	up
MW0146156	Asp-Ile-Ser	L-天冬氨酰-L-异亮氨酰-L-丝氨酸	Amino acids and derivatives	氨基酸及其衍生物	Amino acids and derivatives	氨基酸及其衍生物	C13H23N3O7	3	0.6594	-	9336.66	7239.76	13546.9	25234.5	32838	28650	1.27354	0.00308091	0.0170605	2.87892	1.52553	up
MW0166375	Petiveriin	S-苄基-L-半胱氨酸亚砜	Others	其它类	Others	其它	C10H13NO3S	3	0.6586	-	219.08	7.77	46.02	1337.61	1124.24	1721.79	1.1813	0.0100901	0.0388371	15.332	3.93847	up
MW0150088	Glu-Met-Gln	谷氨酸-蛋氨酸-谷酰胺	Amino acids and derivatives	氨基酸及其衍生物	Amino acids and derivatives	氨基酸及其衍生物	C15H26N4O7S1	3	0.6575	-	522485	483826	499990	158117	93094.6	108793	1.32399	0.00031641	0.00460174	0.238999	-2.06492	down
MW0109468	Pyroglutamylaspartylarginine	焦谷氨酰胺天冬氨酸精氨酸	Amino acids and derivatives	氨基酸及其衍生物	Amino acids and derivatives	氨基酸及其衍生物	C15H24N6O7	3	0.657	-	3990.88	545.88	7151.18	61501.5	57652.2	77382.6	1.22081	0.00556643	0.0251476	16.8153	4.0717	up
MW0156361	[(1R,2R,6R,10S,11R,15R,17R)-13-benzyl-6-hydroxy-4,17-dimethyl-5-oxo-15-prop-1-en-2-yl-12,14,18-trioxapentacyclo[11.4.1.01,10.02,6.011,15]octadeca-3,8-dien-8-yl]methyl 2-(4-hydroxy-2-methoxyphenyl)acetate	树脂毒素；RTX技术	Terpenoids	萜类	Ditepenoids	二萜	C37H40O9	3	0.6559	-	54515.4	2869.64	3227.05	72.29	804.16	527.62	1.08365	0.368964	0.503128	0.0231648	-5.43192	down
MW0147543	cis-3,4-Phenanthrenedihydrodiol-4-carboxylate	顺式-3，4-菲二氢二醇-4-羧酸酯	Benzene and substituted derivatives	苯及其衍生物	Benzene and substituted derivatives	苯及其衍生物	C15H12O4	3	0.6556	-	22300.1	14598.1	13213.2	63520	67845.8	74124.5	1.31965	0.00025417	0.00415165	4.10067	2.03586	up
MW0153098	Lys-Phe-Ile	L-赖氨酸-L-苯丙氨酸-L-异亮氨酸	Amino acids and derivatives	氨基酸及其衍生物	Amino acids and derivatives	氨基酸及其衍生物	C21H34N4O4	3	0.6551	-	2.58682e+06	1.48884e+06	808958	328317	564795	345989	1.17063	0.140779	0.257442	0.253674	-1.97895	down
MW0162200	4-(Phosphooxymethyl)-2-furancarboxaldehyde(2-)	4-(磷氧甲基)-2-呋喃甲醛(2-)	Others	其它类	Lactones	内酯类化合物	C6H5O6P-2	3	0.6549	-	1415.44	1392.16	1512.98	14556	14614.5	15420.2	1.35447	0.000350217	0.00486487	10.3205	3.36744	up
MW0157072	S-Inosyl-L-homocysteine	S-肌苷-L-高半胱氨酸	Amino acids and derivatives	氨基酸及其衍生物	Amino acids and derivatives	氨基酸及其衍生物	C14H19N5O6S	3	0.6546	-	3720.84	3663.48	6502.88	18880.9	21737.6	13712.6	1.28439	0.0180279	0.0583372	3.91232	1.96802	up
MW0104217	13-Dodecan-2-yl-6-(1-hydroxyethyl)-3-(hydroxymethyl)-12-methyl-9-propan-2-yl-1-oxa-4,7,10-triazacyclotridecane-2,5,8,11-tetrone	13-Dodecan-2-yl-6-(1-hydroxyethyl)-3-(hydroxymethyl)-12-methyl-9-propan-2-yl-1-oxa-4,7,10-triazacyclotridecane-2,5, 8,11-四酮	Organic acids	有机酸	Organic acids	有机酸	C28H51N3O7	3	0.6544	-	17479.3	14927.9	15351.6	3566.3	1677.22	2209.05	1.31861	0.000290211	0.00447796	0.156046	-2.67996	down
MW0111587	Ptd(S)Ins-(3,4)-P2 (1,2-dioctanoyl)	Ptd(S)Ins-(3,4)-P2 (1,2-dioctanoyl)	Organic acids	有机酸	Organic acids	有机酸	C25H49O18P3S	3	0.6541	-	5886.39	5581.19	6568.87	750.7	421.19	2200.19	1.20768	0.00396952	0.0199823	0.186959	-2.4192	down
MW0150516	Gly-Tyr-His	甘氨酸-酪氨酸-组氨酸	Amino acids and derivatives	氨基酸及其衍生物	Amino acids and derivatives	氨基酸及其衍生物	C17H21N5O5	3	0.654	-	5785.98	16557.1	15567.5	82708.3	62654.6	65837.7	1.26362	0.00338235	0.0180383	5.57102	2.47794	up
MW0158489	Tyr-His-Ser	酪氨酸-组氨酸-丝氨酸	Amino acids and derivatives	氨基酸及其衍生物	Amino acids and derivatives	氨基酸及其衍生物	C18H23N5O6	3	0.654	-	66495.6	59589.4	68858.6	312762	302416	353498	1.35056	0.00286285	0.0162251	4.96901	2.31296	up
MW0150089	Glu-Met-Glu	谷氨酸-蛋氨酸-谷氨酸	Amino acids and derivatives	氨基酸及其衍生物	Amino acids and derivatives	氨基酸及其衍生物	C15H25N3O8S1	3	0.6539	-	524143	495088	500307	136475	46895	51194.3	1.28146	0.00244277	0.0146731	0.154366	-2.69557	down
ZINC13378518	Blestrianol A	Blestrianol A	Others	其它类	Others	其它	C30H26O6	3	0.6538	-	84135.7	140340	115798	56370	48126.8	59395.6	1.23309	0.0632727	0.143588	0.481648	-1.05395	down
MW0155336	Phe-Ser-Phe	苯丙氨酰-丝氨酰-苯丙氨酸	Amino acids and derivatives	氨基酸及其衍生物	Amino acids and derivatives	氨基酸及其衍生物	C21H25N3O5	3	0.6533	-	77796.6	71283.9	56746.7	20950.8	18044.7	28526.4	1.30071	0.0074036	0.0310722	0.328051	-1.60801	down
MW0151548	Ile-Phe-Thr	L-异亮氨酸-L-苯丙氨酸-L-苏氨酸	Amino acids and derivatives	氨基酸及其衍生物	Amino acids and derivatives	氨基酸及其衍生物	C19H29N3O5	3	0.6532	-	2270.2	2196.61	628.95	17291.8	4507.6	7377.61	1.12833	0.171742	0.297935	5.72574	2.51746	up
MW0110057	Trp-Gln	色氨酸-谷氨酸	Amino acids and derivatives	氨基酸及其衍生物	Amino acids and derivatives	氨基酸及其衍生物	C16H20N4O4	3	0.653	-	21762.4	8955.58	11086.1	103761	73244	88603.6	1.29789	0.00589455	0.0262011	6.35365	2.66759	up
MW0012447	4-Ethenyl-21-hydroxy-6,8,10,12-tetramethyl-15,23-dioxa-25-azaheptacyclo[19.2.2.216,19.13,7.01,22.08,13.014,28]octacosa-5,16(27),17,19(26)-tetraene-2,24-dione	4-Ethenyl-21-hydroxy-6,8,10,12-tetramethyl-15,23-dioxa-25-azaheptacyclo[19.2.2.216,19.13,7.01,22.08,13.014,28]octacosa-5,16(27) ,17,19(26)-四烯-2,24-二酮	Benzene and substituted derivatives	苯及其衍生物	Benzene and substituted derivatives	苯及其衍生物	C31H37NO5	3	0.6529	-	10473.9	8197.15	15451.6	5495.09	5604.13	3196.65	1.16118	0.0769722	0.165639	0.418956	-1.25513	down
MW0000037	(9E)-4,5,6-trihydroxy-9,13,14-trimethyl-16-(2-methylpropyl)-17-azatricyclo[9.7.0.01,15]octadeca-9,12-diene-2,18-dione	(9E)-4,5,6-trihydroxy-9,13,14-trimethyl-16-(2-methylpropyl)-17-azatricyclo[9.7.0.01,15]octadeca-9,12-diene-2,18-dione	Benzene and substituted derivatives	苯及其衍生物	Benzene and substituted derivatives	苯及其衍生物	C24H37NO5	3	0.6521	-	20399.2	18058.2	16870.6	5382.74	3732.71	13058	1.10377	0.0483304	0.118208	0.400763	-1.31918	down
MW0112240	[(2R,3R,4S,5S,6R)-2,4,5-trihydroxy-6-(hydroxymethyl)oxan-3-yl] 2-phenylacetate	[(2R,3R,4S,5S,6R)-2,4,5-trihydroxy-6-(hydroxymethyl)oxan-3-yl] 2-phenylacetate	Benzene and substituted derivatives	苯及其衍生物	Benzene and substituted derivatives	苯及其衍生物	C14H18O7	3	0.6519	-	1117.93	1061.61	1267.53	822.01	299.05	525.54	1.09651	0.0431132	0.109102	0.477681	-1.06588	down
MW0110184	Tyr-Ala-Lys	酪氨酸-丙氨酸-赖氨酸	Amino acids and derivatives	氨基酸及其衍生物	Amino acids and derivatives	氨基酸及其衍生物	C18H28N4O5	3	0.6495	-	6110.47	11653.6	9415.17	3583.89	2202.53	499.58	1.09571	0.0301844	0.0847274	0.231279	-2.11229	down
MW0156697	Ser-Cys-Ser	丝氨酰-半胱氨酰-丝氨酸	Amino acids and derivatives	氨基酸及其衍生物	Amino acids and derivatives	氨基酸及其衍生物	C9H17N3O6S1	3	0.6483	-	76137.9	131814	178557	59289	42642.5	80051.3	1.03239	0.136009	0.250622	0.470837	-1.0867	down
MW0166343	25-O-deacetyl-27-O-demethylrifamycin S	25-O-deacetyl-27-O-demethylrifamycin S	Others	其它类	Ketone compounds	酮类化合物	C34H41NO11	3	0.6466	-	12850.6	11826.9	6859.96	80987.4	89369.7	83196.1	1.33157	3.67774e-05	0.00167509	8.03974	3.00715	up
MW0148086	Cys-Tyr-Thr	半胱氨酸-酪氨酸-苏氨酸	Amino acids and derivatives	氨基酸及其衍生物	Amino acids and derivatives	氨基酸及其衍生物	C16H23N3O6S1	3	0.6465	-	21027.2	22132.5	17718	50576.4	55602.3	39352.7	1.30329	0.0214319	0.0658143	2.39056	1.25735	up
MW0158688	Tyr-Gly-Tyr	酪氨酸-甘氨酸-酪氨酸	Amino acids and derivatives	氨基酸及其衍生物	Amino acids and derivatives	氨基酸及其衍生物	C20H23N3O6	3	0.6465	-	24645.1	15434.6	25557.5	69151.7	81020.8	78416.8	1.30907	0.000382139	0.00514344	3.48262	1.80017	up
MW0159219	Val-Tyr-Ile	缬氨酸-酪氨酸-异亮氨酸	Amino acids and derivatives	氨基酸及其衍生物	Amino acids and derivatives	氨基酸及其衍生物	C20H31N3O5	3	0.6463	-	3692.41	4278.09	11855.1	49436.7	50141.7	55306.6	1.28491	0.000290602	0.00447796	7.81238	2.96576	up
MW0146299	Asp-Tyr-Gln	L-天冬氨酰-L-酪氨酰-L-谷氨酰胺	Amino acids and derivatives	氨基酸及其衍生物	Amino acids and derivatives	氨基酸及其衍生物	C18H24N4O8	3	0.645	-	8309.3	5271.18	4211.25	20628.2	33590.6	32514.5	1.29117	0.0236469	0.0708754	4.87492	2.28538	up
MW0156902	Ser-Pro-Val	丝氨酰-脯氨酰-缬氨酸	Amino acids and derivatives	氨基酸及其衍生物	Amino acids and derivatives	氨基酸及其衍生物	C13H23N3O5	3	0.6445	-	6737.58	3156.51	1569.74	10838	12995.5	14136.9	1.14697	0.012352	0.0445867	3.31219	1.72779	up
MW0106971	Glutamyllysyllysine	谷氨酸-赖氨酸-赖氨酸	Amino acids and derivatives	氨基酸及其衍生物	Amino acids and derivatives	氨基酸及其衍生物	C17H33N5O6	3	0.6443	-	26326.4	25104.2	24749.8	4276.5	4177.81	4186.15	1.35464	0.000482976	0.00585884	0.165928	-2.59137	down
MW0160515	Isobutylacetate	异丁烯二酸	Organic acids	有机酸	Organic acids	有机酸	C6H11O2-	3	0.6441	-	2070.62	1771.03	419.79	14763.7	2678.14	13754.3	1.07238	0.143989	0.261598	7.32056	2.87195	up
MW0106861	Glutaminyllysyllysine	Gln Lys Lys	Amino acids and derivatives	氨基酸及其衍生物	Amino acids and derivatives	氨基酸及其衍生物	C17H34N6O5	3	0.6433	-	31283.5	30085.7	27273.2	78163.2	100221	96245.6	1.33903	0.0100393	0.0387109	3.09818	1.63142	up
MW0152976	Lys-Gly-His	L-赖氨酸-L-甘氨酸-L-组氨酸	Amino acids and derivatives	氨基酸及其衍生物	Amino acids and derivatives	氨基酸及其衍生物	C14H24N6O4	3	0.6423	-	27912.9	21174.7	34780.7	334155	95922.6	107157	1.21322	0.190578	0.32209	6.40569	2.67935	up
MW0145919	Asn-Trp-Phe	L-天冬酰胺-L-色氨酸-L-苯丙氨酸	Amino acids and derivatives	氨基酸及其衍生物	Amino acids and derivatives	氨基酸及其衍生物	C24H27N5O5	3	0.6422	-	1995.52	922.7	1927.83	72225.6	64707.8	66103.1	1.34287	0.00097904	0.00884623	41.8973	5.38879	up
MW0150131	Glu-Pro-Trp	谷氨酸-脯氨酸-色氨酸	Amino acids and derivatives	氨基酸及其衍生物	Amino acids and derivatives	氨基酸及其衍生物	C21H26N4O6	3	0.6416	-	76.71	1361	189.21	17450.2	19714.2	21203.3	1.25911	0.00120405	0.00982093	35.8762	5.16496	up
MW0148013	Cys-His-Ala	半胱氨酸-组氨酸-丙氨酸	Amino acids and derivatives	氨基酸及其衍生物	Amino acids and derivatives	氨基酸及其衍生物	C12H19N5O4S1	3	0.6407	-	20094.8	50919.2	64645.3	179256	208964	133945	1.1997	0.0119243	0.0435993	3.84909	1.94452	up
MW0152752	L-Olivosyl-oleandolide	L-橄榄核-齐墩果内酯	Heterocyclic compounds	杂环化合物	Heterocyclic compounds	杂环化合物	C26H44O10	3	0.6405	-	27848.1	7812.04	20021	36981.7	44958.4	38272.8	1.02548	0.0499295	0.120576	2.15895	1.11033	up
MW0153619	Met-Met-Gly	甲硫氨酰-甲硫氨酰-甘氨酸	Amino acids and derivatives	氨基酸及其衍生物	Amino acids and derivatives	氨基酸及其衍生物	C12H23N3O4S2	3	0.6403	-	78609.1	64334.7	68273.4	21724	24871	18175.2	1.33288	0.00255103	0.0150903	0.306652	-1.70533	down
MW0153629	Met-Phe-Glu	甲硫氨酰-苯丙氨酰-谷氨酸	Amino acids and derivatives	氨基酸及其衍生物	Amino acids and derivatives	氨基酸及其衍生物	C19H27N3O6S1	3	0.6402	-	164368	230556	150421	537458	612192	488816	1.31104	0.00185303	0.012432	3.00446	1.5871	up
MW0147998	Cys-Gln-Gln	半胱氨酸-谷酰氨-谷酰氨	Amino acids and derivatives	氨基酸及其衍生物	Amino acids and derivatives	氨基酸及其衍生物	C13H23N5O6S1	3	0.6391	-	77424.8	35454.9	55764.4	148877	172059	178347	1.25255	0.00254438	0.0150647	2.96058	1.56588	up
MW0157729	Thr-Lys-Ile	苏氨酸-赖氨酸-异亮氨酸	Amino acids and derivatives	氨基酸及其衍生物	Amino acids and derivatives	氨基酸及其衍生物	C16H32N4O5	3	0.6391	-	5049.11	6250.22	2942.92	8488.02	10853.6	9263.23	1.14289	0.019163	0.0608169	2.00845	1.00608	up
MW0152925	Lys-Cys-His	L-赖氨酸-L-半胱氨酸-L-组氨酸	Amino acids and derivatives	氨基酸及其衍生物	Amino acids and derivatives	氨基酸及其衍生物	C15H26N6O4S1	3	0.6383	-	52468.2	48489.7	48674.1	160265	193384	229241	1.33836	0.0181481	0.0585749	3.89549	1.9618	up
MW0167849	7,8-Dihydroneoxanthin	7,8-二氢新黄质	Terpenoids	萜类	Terpene	萜类	C40H58O4	3	0.6383	-	560798	906258	623611	240067	175466	137208	1.28801	0.0324976	0.089037	0.264385	-1.91929	down
MW0107457	Ile-Phe-Lys	L-异亮氨酸-L-苯丙氨酸-L-赖氨酸	Amino acids and derivatives	氨基酸及其衍生物	Amino acids and derivatives	氨基酸及其衍生物	C21H34N4O4	3	0.636	-	1.80423e+07	1.18506e+07	9.83879e+06	4.43687e+06	3.71834e+06	4.01279e+06	1.28953	0.0642125	0.145224	0.306254	-1.7072	down
MW0145393	Arg-Ile-Ile	L-精氨酰-L-异亮氨酰-L-异亮氨酸	Amino acids and derivatives	氨基酸及其衍生物	Amino acids and derivatives	氨基酸及其衍生物	C18H36N6O4	3	0.63	-	1061.67	2508.24	2666.46	6215.04	7526.29	3507.48	1.10157	0.0731503	0.159367	2.76584	1.46772	up
MW0105881	Asp-Tyr-Lys	L-天冬氨酰-L-酪氨酰-L-赖氨酸	Amino acids and derivatives	氨基酸及其衍生物	Amino acids and derivatives	氨基酸及其衍生物	C19H28N4O7	3	0.63	-	30068.2	41763.1	54710.8	145167	156224	146875	1.30844	0.00105628	0.00916082	3.54243	1.82474	up
MW0155268	Phe-Lys-Gln	苯丙氨酰-赖氨酰-谷氨酰胺	Amino acids and derivatives	氨基酸及其衍生物	Amino acids and derivatives	氨基酸及其衍生物	C20H31N5O5	3	0.6298	-	31800.8	17849.1	20348.7	5967.76	4823.16	5109.34	1.313	0.0514774	0.123125	0.227151	-2.13828	down
MW0166568	"""delphinidin 3-O-(6""""""""""""""""""""""""""""""""-O-malyl-beta-D-glucoside)"""""""""""	"""飞燕草素 3-O-(6""""""""""""""""""""""""""""""""-O-丙二酰基-beta-D-葡萄糖苷)"""""""""""	Flavonoids	黄酮	Anthocyanidins	花青素	C25H22O16-2	3	0.6286	-	958.94	810.51	594.02	2655.89	1455.6	2868.7	1.21936	0.0656601	0.147454	2.95337	1.56236	up
MW0161891	2-Methylbutyrate	2-丁酸甲酯	Organic acids	有机酸	Organic acids	有机酸	C5H9O2-	3	0.6272	-	4842.96	1817.13	1339.91	33383.3	32376.9	28467.8	1.29822	0.000179931	0.0034303	11.7785	3.55808	up
MW0110224	Tyr-Trp-Lys	酪氨酸-色氨酸-赖氨酸	Amino acids and derivatives	氨基酸及其衍生物	Amino acids and derivatives	氨基酸及其衍生物	C26H33N5O5	3	0.6241	-	19562.8	36109.1	41808.5	88250.6	62907.1	61196.2	1.14152	0.0282448	0.080641	2.17842	1.12328	up
MW0151152	His-Val-Met	L-组氨酸-L-缬氨酸-L-蛋氨酸	Amino acids and derivatives	氨基酸及其衍生物	Amino acids and derivatives	氨基酸及其衍生物	C16H27N5O4S1	3	0.6241	-	55111.2	47655.7	47702.7	26651.3	14519.9	6366.54	1.14242	0.0167173	0.0555618	0.315929	-1.66233	down
ZINC13380123	Bulbocodin C	bulbocodin C	Others	其它类	Stilbene	茋类	C29H28O5	3	0.623	-	44508.7	130500	86805.4	44065.2	21398.2	36131.3	1.03349	0.157142	0.279501	0.388042	-1.36572	down
MW0156886	Ser-Pro-Asn	L-丝氨酰-L-脯氨酰-L-天冬酰胺	Amino acids and derivatives	氨基酸及其衍生物	Amino acids and derivatives	氨基酸及其衍生物	C12H20N4O6	3	0.6227	-	58816.5	48671.8	54703.7	17974.5	11666.3	13219.8	1.32676	0.000785725	0.00766967	0.264259	-1.91998	down
MW0141697	1-Benzyl-7,8-dimethoxy-3-phenyl-3H-pyrazolo[3,4-c]isoquinoline	1-苄基-7，8-二甲氧基-3-苯基-3H-吡唑并[3，4-c]异喹啉	Benzene and substituted derivatives	苯及其衍生物	Benzene and substituted derivatives	苯及其衍生物	C25H21N3O2	3	0.6215	-	9583.2	12646	11000.7	4945.85	4963.53	5452.96	1.32171	0.018531	0.0592571	0.462305	-1.11308	down
MW0158445	Tyr-Gln-Tyr	酪氨酸-谷氨酰胺-酪氨酸	Amino acids and derivatives	氨基酸及其衍生物	Amino acids and derivatives	氨基酸及其衍生物	C23H28N4O7	3	0.6202	-	92341.7	72789.7	91490.4	173519	193180	196516	1.32316	0.000473463	0.00579657	2.19473	1.13404	up
MW0150426	Gly-Lys-Ser	甘氨酸-赖氨酸-丝氨酸	Amino acids and derivatives	氨基酸及其衍生物	Amino acids and derivatives	氨基酸及其衍生物	C11H22N4O5	3	0.6199	-	11539.9	9123.6	13552.7	4274.16	1824.47	3097.76	1.25727	0.00963631	0.0377363	0.268773	-1.89554	down
MW0157632	Thr-Glu-Ile	苏氨酰-谷氨酰-异亮氨酸	Amino acids and derivatives	氨基酸及其衍生物	Amino acids and derivatives	氨基酸及其衍生物	C15H27N3O7	3	0.6192	-	4021.27	1127.56	10532.7	21733	13284.8	20573.7	1.04349	0.0257665	0.0754641	3.54502	1.82579	up
MW0145727	Asn-Gln-Phe	L-天冬酰胺-L-谷氨酰胺-L-苯丙氨酸	Amino acids and derivatives	氨基酸及其衍生物	Amino acids and derivatives	氨基酸及其衍生物	C18H25N5O6	3	0.6186	-	19172.1	17459.6	5596.67	3187.19	5458.29	2736.7	1.09375	0.132794	0.246592	0.269539	-1.89143	down
MW0164263	D-nopalinate(1-)	D-胭脂酸盐(1-)	Organic acids	有机酸	Organic acids	有机酸	C11H19N4O6-	3	0.6177	-	32851.2	61261.2	49411.9	135369	125925	109645	1.26078	0.00252056	0.0150057	2.58451	1.36989	up
MW0001930	2-(4-Hydroxy-3-methoxyphenyl)-1,3-thiazolidin-3-ium-4-carboxylate	2-(4-Hydroxy-3-methoxyphenyl)-1,3-thiazolidin-3-ium-4-carboxylate	Benzene and substituted derivatives	苯及其衍生物	Benzene and substituted derivatives	苯及其衍生物	C11H13NO4S	3	0.6171	-	738.48	2616.03	617.19	3470.69	6257.59	6086.9	1.14742	0.0278166	0.0796281	3.98197	1.99348	up
MW0006184	2-(2,5-dimethoxy-4-methylsulfanylphenyl)-N-[(2-methoxyphenyl)methyl]ethanamine	2-(2,5-二甲氧基-4-甲基硫烷基苯基)-N-[(2-甲氧基苯基)甲基]乙胺	Benzene and substituted derivatives	苯及其衍生物	Benzene and substituted derivatives	苯及其衍生物	C19H25NO3S	3	0.6165	-	747.92	5457.96	3554.42	19520.9	25864.5	22822.9	1.18906	0.00145624	0.0109445	6.98834	2.80495	up
MW0159196	Val-Trp-Ala	缬氨酸-色氨酸-丙氨酸	Amino acids and derivatives	氨基酸及其衍生物	Amino acids and derivatives	氨基酸及其衍生物	C19H26N4O4	3	0.6157	-	195.05	123.92	488.58	55.5	65.2	102.54	1.07412	0.221587	0.356321	0.276441	-1.85496	down
MW0002514	2-(Dibenzylcarbamoyl)benzoic acid	2-(二苄基氨基甲酰基)苯甲酸	Benzene and substituted derivatives	苯及其衍生物	Benzene and substituted derivatives	苯及其衍生物	C22H19NO3	3	0.6155	-	1608.91	3486.32	903.85	11242.4	11538.3	15485.6	1.25568	0.00541417	0.024663	6.3787	2.67326	up
MW0163429	S-[(Z)-Phenylacetohydroxymoyl]-L-cysteine	S-(苯乙酰硫代羟氨酰基)-L-半胱氨酸	Others	其它类	Others	其它	C11H14N2O3S	3	0.6152	-	22019.5	20221.1	23049.3	7657.9	9814.6	7271.98	1.32728	0.000297044	0.00452745	0.378994	-1.39975	down
MW0150891	His-Cys-Val	组氨酸-半胱氨酸-缬氨酸	Amino acids and derivatives	氨基酸及其衍生物	Amino acids and derivatives	氨基酸及其衍生物	C14H23N5O4S1	3	0.6144	-	114543	105368	108283	19378.5	22355.8	8955.16	1.29987	0.000122481	0.00278408	0.15445	-2.69479	down
MW0145346	Arg-Glu-Gly	L-精氨酰-L-谷氨酰-甘氨酸	Amino acids and derivatives	氨基酸及其衍生物	Amino acids and derivatives	氨基酸及其衍生物	C13H24N6O6	3	0.6127	-	11078	14630.8	10791.6	176988	193303	196482	1.35125	0.000775859	0.00762407	15.5279	3.95679	up
MW0144784	Ala-Tyr-Trp	L-丙氨酰-L-酪氨酰-L-色氨酸	Amino acids and derivatives	氨基酸及其衍生物	Amino acids and derivatives	氨基酸及其衍生物	C23H26N4O5	3	0.6123	-	21753.9	22486.7	23300.6	1950.8	3486.4	3538.15	1.33059	1.11523e-05	0.00116551	0.132887	-2.91173	down
MW0113227	NCGC00384770-01_C19H28O13_5-Hydroxy-2,3-dimethoxyphenyl 4-O-[(2S,3R,4R)-3,4-dihydroxy-4-(hydroxymethyl)tetrahydro-2-furanyl]-beta-D-glucopyranoside	NCGC00384770-01_C19H28O13_5-Hydroxy-2,3-dimethoxyphenyl 4-O-[(2S,3R,4R)-3,4-dihydroxy-4-(hydroxymethyl)tetrahydro-2-furanyl]-beta-D-glucopyranoside	Benzene and substituted derivatives	苯及其衍生物	Benzene and substituted derivatives	苯及其衍生物	C19H28O13	3	0.6123	-	8666.37	9845.48	3552.87	21379.2	24433.5	12390.4	1.08451	0.0591734	0.136129	2.63784	1.39936	up
MW0142962	3-Hydroxy-7,8-dimethoxy-6-isopropoxy-2-naphthoate	3-羟基-7,8-二甲氧基-6-异丙氧基-2-萘甲酸; 3-羟基-7,8-二甲氧基-6-异丙氧基-2-萘甲酸	Benzene and substituted derivatives	苯及其衍生物	Benzene and substituted derivatives	苯及其衍生物	C16H18O6	3	0.6113	-	158791	78005.1	118927	35238.5	10956.2	42950.8	1.14521	0.0468447	0.115574	0.250603	-1.99652	down
MW0161435	(R)-[(2S,4R,5R)-5-ethenyl-1-azoniabicyclo[2.2.2]octan-2-yl]-(6-methoxyquinolin-4-yl)methanol	(R)-[(2S,4R,5R)-5-ethenyl-1-azoniabicyclo[2.2.2]octan-2-yl]-(6-methoxyquinolin-4-yl)methanol	Alkaloids	生物碱	Alkaloids	生物碱	C20H25N2O2+	3	0.6111	-	2930.76	1933.08	3194.27	1043.9	1031.07	1699.24	1.16631	0.0444157	0.111246	0.468374	-1.09427	down
MW0143289	4'-Cinnamoylmussatioside	4-肉桂酰-Mussatioside	Organic acids	有机酸	Organic acids	有机酸	C34H44O16	3	0.611	-	41032.1	23517.7	32209.2	69160.6	77791.1	76684.5	1.26474	0.00480986	0.0226751	2.31127	1.20869	up
MW0142637	3-(phosphoacetamido)-L-alanine	3-(磷酸乙酰氨基)-L-丙氨酸	Amino acids and derivatives	氨基酸及其衍生物	Amino acids and derivatives	氨基酸及其衍生物	C5H11N2O7P	3	0.6107	-	59.33	92.37	137.14	2616.23	2402.13	2736.17	1.34079	0.000946489	0.00864485	26.8471	4.7467	up
MW0147890	Cyanidin 3-glucoside 5-caffeoylglucoside	矢车菊素3-葡萄糖苷-5-咖啡酰葡萄糖苷	Flavonoids	黄酮	Anthocyanidins	花青素	C36H37O19+	3	0.6104	-	20796.6	10110.9	13966.6	2510.69	5718.39	6263.41	1.15393	0.0690475	0.152887	0.322959	-1.63058	down
MW0163482	Baicalin(1-)	黄芩(1-)	Organic acids	有机酸	Organic acids	有机酸	C21H17O11-	3	0.6104	-	14902.8	16424.5	14498.8	4973.38	942.6	1589.99	1.22207	0.00332228	0.0178497	0.163793	-2.61006	down
ZINC14591298	Aristolochic acid II methyl ester	6-硝基萘并[2，1-g][1，3]苯并二氧杂环戊烯-5-羧酸甲酯	Benzene and substituted derivatives	苯及其衍生物	Benzene and substituted derivatives	苯及其衍生物	C17H11NO6	3	0.6096	-	33943	63590.2	7703.2	2192.34	7205.58	4817.29	1.05886	0.200092	0.331752	0.135079	-2.88813	down
MW0144804	Ala-Val-Met	L-丙氨酰-L-缬氨酰-L-蛋氨酸	Amino acids and derivatives	氨基酸及其衍生物	Amino acids and derivatives	氨基酸及其衍生物	C13H25N3O4S1	3	0.6079	-	33289.1	25371.9	13526	42689.3	49505.6	54074.3	1.10032	0.030207	0.0847543	2.02626	1.01882	up
MW0146318	Asp-Val-Glu	Asp-Val-Glu	Amino acids and derivatives	氨基酸及其衍生物	Amino acids and derivatives	氨基酸及其衍生物	C14H23N3O8	3	0.607	-	161747	157065	163834	12603.6	47005.6	33193.5	1.23936	0.00451408	0.0217889	0.192279	-2.37873	down
MW0133594	4-Benzyloxy-2',3,4',6'-tetramethoxychalcone	4-苄氧基-2',3,4',6'-四甲氧基查耳酮	Benzene and substituted derivatives	苯及其衍生物	Benzene and substituted derivatives	苯及其衍生物	C26H26O6	3	0.6064	-	1888.61	907.47	1437.41	25105.2	29234.6	26368	1.34059	0.00146212	0.0109673	19.0641	4.25279	up
MW0150487	Gly-Thr-Gln	甘氨酸-苏氨酸-谷酰胺	Amino acids and derivatives	氨基酸及其衍生物	Amino acids and derivatives	氨基酸及其衍生物	C11H20N4O6	3	0.6063	-	8889.31	8204.7	5774.3	25665.5	40908.2	40895	1.30974	0.0275362	0.0790088	4.69946	2.23249	up
MW0145852	Asn-Phe-Asp	L-天冬酰胺-L-苯丙氨酰-L-天冬氨酸	Amino acids and derivatives	氨基酸及其衍生物	Amino acids and derivatives	氨基酸及其衍生物	C17H22N4O7	3	0.6062	-	34278.2	16450.8	27138.3	88524.4	84470.3	68073.7	1.25957	0.00291194	0.0163476	3.09589	1.63035	up
MW0142680	3',4'-Dihydrorhodovibrin	3',4'-二氢紫红丝蛋白	Alcohol and amines	醇、胺类	Alcohols	醇类	C41H62O2	3	0.6061	-	12812.8	15533	30350.3	11679.5	9757.22	7853.74	1.00826	0.210359	0.34395	0.499017	-1.00284	down
MW0158268	Trp-Trp-Ser	色氨酸-色氨酸-丝氨酸	Amino acids and derivatives	氨基酸及其衍生物	Amino acids and derivatives	氨基酸及其衍生物	C25H27N5O5	3	0.6058	-	1432.71	3969.57	3777.06	39558.7	33122.7	52994.2	1.3095	0.0203147	0.0633467	13.6911	3.77517	up
MW0155988	Pro-Ser-Asp	脯氨酰-丝氨酰-天冬氨酸	Amino acids and derivatives	氨基酸及其衍生物	Amino acids and derivatives	氨基酸及其衍生物	C12H19N3O7	3	0.6046	-	8046.82	3057.73	5103.05	10596.9	13185.1	25002.9	1.11704	0.12309	0.232687	3.01	1.58976	up
MW0151248	Hydronitroxide radical	氢氮氧自由基	Benzene and substituted derivatives	苯及其衍生物	Benzene and substituted derivatives	苯及其衍生物	C12H10NO	3	0.6041	-	181.93	458.71	727.38	3402.98	3789.22	6273.93	1.26925	0.0427111	0.108567	9.84352	3.29917	up
MW0146077	Asp-Gln-Asp	L-天冬氨酰-L-谷氨酰胺-L-天冬氨酸	Amino acids and derivatives	氨基酸及其衍生物	Amino acids and derivatives	氨基酸及其衍生物	C13H20N4O9	3	0.6032	-	79742.1	79026	84804.1	22452.9	11056.4	23715.4	1.28748	0.00114256	0.00951711	0.234939	-2.08964	down
MW0150847	His-Asn-Asp	组氨酸-天门冬酰氨-天门冬氨酸	Amino acids and derivatives	氨基酸及其衍生物	Amino acids and derivatives	氨基酸及其衍生物	C14H20N6O7	3	0.6027	-	4461.6	5631.5	5101.34	1107.49	2567.74	2159.19	1.20011	0.00571488	0.0255871	0.383984	-1.38088	down
MW0154136	N1,N5,N10-tricaffeoyl spermidine	N1,N5,N10-三咖啡酰亚精胺	Heterocyclic compounds	杂环化合物	Heterocyclic compounds	杂环化合物	C34H37N3O9	3	0.6027	-	29997.2	35186.4	20781.3	84764.2	71119.6	166405	1.22393	0.115169	0.22177	3.74907	1.90653	up
MW0156687	Ser-Asp-Thr	L-丝氨酰-L-天冬氨酰-L-苏氨酸	Amino acids and derivatives	氨基酸及其衍生物	Amino acids and derivatives	氨基酸及其衍生物	C11H19N3O8	3	0.6019	-	1.12927e+06	1.10299e+06	1.06216e+06	2.19958e+06	2.31821e+06	2.55269e+06	1.34468	0.00538507	0.0245845	2.14619	1.10178	up
MW0105560	Alanylserylarginine	Ala Ser Arg	Amino acids and derivatives	氨基酸及其衍生物	Amino acids and derivatives	氨基酸及其衍生物	C12H24N6O5	3	0.6016	-	8474.79	6298.24	6107.89	2387.42	2432.29	3209.32	1.29919	0.0205229	0.0637456	0.384515	-1.37889	down
MW0151381	Ile-Cys-Gln	L-异亮氨酸-L-半胱氨酸-L-谷氨酰胺	Amino acids and derivatives	氨基酸及其衍生物	Amino acids and derivatives	氨基酸及其衍生物	C14H26N4O5S1	3	0.6013	-	173582	175370	169938	77862.3	84690.9	84148	1.35096	1.10182e-05	0.00116551	0.47544	-1.07267	down
MW0110350	Val-Ile-Arg	缬氨酸-异亮氨酸-精氨酸	Amino acids and derivatives	氨基酸及其衍生物	Amino acids and derivatives	氨基酸及其衍生物	C17H34N6O4	3	0.6012	-	9949.61	8773.97	5606.23	1211.95	3322.76	250.35	1.08424	0.0183664	0.0589048	0.196675	-2.34612	down
MW0168177	Jadomycin B	佳多霉素B	Others	其它类	Ketone compounds	酮类化合物	C30H31NO9	3	0.6011	-	2020.21	645.42	2547.24	424.47	652.47	624.69	1.00478	0.173118	0.299718	0.326429	-1.61516	down
MW0155848	Pro-Glu-Gln	脯氨酰-谷氨酰-谷氨酰胺	Amino acids and derivatives	氨基酸及其衍生物	Amino acids and derivatives	氨基酸及其衍生物	C15H24N4O7	3	0.601	-	134571	138082	113539	47218.5	43165.7	38264.7	1.33853	0.00415166	0.0206978	0.333121	-1.58588	down
MW0115845	NCGC00380384-01_C21H26O7_(2E,4E)-6-{[(5R,9aS,9bS)-9b-Hydroxy-6,6,9a-trimethyl-1-oxo-1,3,5,5a,6,7,8,9,9a,9b-decahydronaphtho[1,2-c]furan-5-yl]oxy}-6-oxo-2,4-hexadienoic acid	NCGC00380384-01_C21H26O7_(2E,4E)-6-{[(5R,9aS,9bS)-9b-Hydroxy-6,6,9a-trimethyl-1-oxo-1,3,5,5a,6,7,8,9,9a,9b-decahydronaphtho[1,2-c]furan-5-yl]oxy}-6-oxo-2,4-hexadienoic acid	Organic acids	有机酸	Organic acids	有机酸	C21H26O7	3	0.6	-	1080.52	1013.48	997.32	53440.5	55514.1	54668.4	1.35482	0.000123321	0.00279342	52.9298	5.72601	up
MW0150273	Glutathionylaminopropylcadaverine	谷胱甘肽氨丙基尸胺	Alcohol and amines	醇、胺类	Polyamines	多胺	C18H36N6O5S	3	0.5995	-	16686.4	22823	17789.3	8755.86	7692.75	9605.14	1.29972	0.0239396	0.0713905	0.454701	-1.13701	down
MW0000941	Isobutyric acid 2-methoxy-4-[1-(acetyloxy)-2-propenyl]phenyl ester	异丁酸2-甲氧基-4-[1-(乙酰氧基)-2-丙烯基]苯基酯	Phenolic acids	酚酸类	Phenolic acids	酚酸类	C16H20O5	3	0.5968	-	171.16	84.22	397.46	517.62	821.08	628.15	1.09396	0.0273459	0.0785576	3.01276	1.59109	up
MW0010568	(2R,3S,4S,5R,6S)-2-(hydroxymethyl)-6-[4-[[(3S,4S)-4-(hydroxymethyl)-5-[3-methoxy-4-[(2S,3R,4S,5S,6R)-3,4,5-trihydroxy-6-(hydroxymethyl)oxan-2-yl]oxyphenyl]oxolan-3-yl]methyl]-2-methoxyphenoxy]oxane-3,4,5-triol	(2R,3S,4S,5R,6S)-2-(羟甲基)-6-[4-[[(3S,4S)-4-(羟甲基)-5-[3-甲氧基-4-[(2S, 3R,4S,5S,6R)-3,4,5-trihydroxy-6-(hydroxymethyl)oxan-2-yl]oxyphenyl]oxolan-3-yl]methyl]-2-methoxyphenoxy]oxane-3,4,5 -三醇	Lignans and Coumarins	木脂素和香豆素	Lignans	木脂素	C32H44O16	3	0.5953	-	24915.3	15199.4	17882.6	36837.5	33406.4	88263.1	1.08972	0.196925	0.328428	2.73301	1.45049	up
MW0157604	Thr-Gln-Asn	苏氨酸谷氨酰胺天冬酰胺	Amino acids and derivatives	氨基酸及其衍生物	Amino acids and derivatives	氨基酸及其衍生物	C13H23N5O7	3	0.5953	-	32632.7	11869.9	17652.3	8721.92	8633.13	5472.99	1.10586	0.164824	0.289756	0.367277	-1.44506	down
MW0148736	dTDP-4-amino-2,3,4,6-tetradeoxy-D-glucose	DTDP-4-氨基-2，3，4，6-四氧-D-葡萄糖；dTDP-[（2R，5S，6R)-5-氨基四氢-6-甲基-2H-吡喃-2-基]酯；DTDP-4-氨基-2，3，4，6-四脱氧-alpha-D-赤型吡喃己糖	Nucleotides and derivatives	核苷酸及其衍生物	Nucleotides and derivatives	核苷酸及其衍生物	C16H27N3O12P2	3	0.5931	-	7909.88	7407.09	8803.44	16383.3	16618.9	24071.5	1.2904	0.0457827	0.1136	2.3662	1.24257	up
MW0157694	Thr-Ile-Tyr	苏氨酰-异亮氨酰-酪氨酸	Amino acids and derivatives	氨基酸及其衍生物	Amino acids and derivatives	氨基酸及其衍生物	C19H29N3O6	3	0.5926	-	5942.51	22984.4	14871.9	45929.2	51399.6	45899.8	1.16034	0.012937	0.0459581	3.27015	1.70936	up
MW0150337	Gly-Cys-Val	甘氨酸-半胱氨酸-缬氨酸	Amino acids and derivatives	氨基酸及其衍生物	Amino acids and derivatives	氨基酸及其衍生物	C10H19N3O4S1	3	0.5917	-	8276.57	3447.16	1564.84	47003.4	49696	47742.2	1.27077	0.000579417	0.00650569	10.8696	3.44223	up
MW0144573	Ala-Glu-Tyr	L-丙氨酰-L-谷氨酰-L-酪氨酸	Amino acids and derivatives	氨基酸及其衍生物	Amino acids and derivatives	氨基酸及其衍生物	C17H23N3O7	3	0.5906	-	304118	297382	280819	803514	811421	837005	1.35307	6.27945e-06	0.000949365	2.77898	1.47455	up
MW0150069	Glu-Lys-Cys	谷氨酸-赖氨酸-半胱氨酸	Amino acids and derivatives	氨基酸及其衍生物	Amino acids and derivatives	氨基酸及其衍生物	C14H26N4O6S1	3	0.5894	-	14853.6	3458.21	5668.2	33877.1	32931.7	33814.9	1.19766	0.017534	0.0572418	4.19615	2.06907	up
MW0150870	His-Asp-Gln	组氨酸-天门冬氨酸-谷酰胺	Amino acids and derivatives	氨基酸及其衍生物	Amino acids and derivatives	氨基酸及其衍生物	C15H22N6O7	3	0.5884	-	99874.5	98918.2	98875.5	9361.5	10888	34176.9	1.24247	0.0095746	0.0375872	0.182842	-2.45133	down
MW0107367	Histidylvalyllysine	His Val Lys	Amino acids and derivatives	氨基酸及其衍生物	Amino acids and derivatives	氨基酸及其衍生物	C17H30N6O4	3	0.5874	-	37979.7	11284.6	18165.3	42077.2	41564	56284.4	1.02294	0.0742129	0.161303	2.07514	1.05321	up
MW0158360	Tyr-Ala-Phe	酪氨酸-丙氨酸-苯丙氨酸	Amino acids and derivatives	氨基酸及其衍生物	Amino acids and derivatives	氨基酸及其衍生物	C21H25N3O5	3	0.5874	-	172087	164233	170287	78223.2	40812	67972.8	1.26528	0.00848976	0.0343661	0.369138	-1.43777	down
MW0166214	15 epi-lipoxin B4	15 表脂氧素 B4	Lipids	脂质	Free fatty acids	游离脂肪酸	C20H31O5-	3	0.5873	-	13222.6	11315.1	11088.1	3541.21	4524.92	3210.01	1.32845	0.00140112	0.0106938	0.316515	-1.65965	down
MW0158832	Ureidoacrylic acid	脲基丙烯酸	Organic acids	有机酸	Organic acids	有机酸	C4H6N2O3	3	0.5869	-	1818.05	3469.94	2999.11	10261.3	10882.9	11455.8	1.30429	0.000333599	0.00471833	3.93383	1.97594	up
MW0151138	His-Tyr-Val	L-组氨酸-L-酪氨酸-L-缬氨酸	Amino acids and derivatives	氨基酸及其衍生物	Amino acids and derivatives	氨基酸及其衍生物	C20H27N5O5	3	0.5867	-	44151.2	54687.5	44366.5	5399.09	8346.98	18221.5	1.23704	0.00214997	0.0134861	0.223229	-2.1634	down
MW0110337	Val-Asp-Lys	缬氨酸-天冬氨酸-赖氨酸	Amino acids and derivatives	氨基酸及其衍生物	Amino acids and derivatives	氨基酸及其衍生物	C15H28N4O6	3	0.585	-	4522.67	5240.17	4331.34	5597.81	10164.5	14800.3	1.04605	0.173471	0.30009	2.16846	1.11667	up
MW0156020	Pro-Trp-Tyr	脯氨酰-色氨酸-酪氨酸	Amino acids and derivatives	氨基酸及其衍生物	Amino acids and derivatives	氨基酸及其衍生物	C25H28N4O5	3	0.5849	-	2215.55	6839.96	2599.76	5963.03	10519.3	9578.77	1.02452	0.0775421	0.166315	2.23599	1.16092	up
MW0148030	Cys-Leu-Thr	半胱氨酸-亮氨酸-苏氨酸	Amino acids and derivatives	氨基酸及其衍生物	Amino acids and derivatives	氨基酸及其衍生物	C13H25N3O5S1	3	0.5839	-	218511	216291	203033	10238.6	9159.02	8232.07	1.35374	0.000479257	0.0058455	0.043318	-4.52889	down
MW0103926	(4E,6E)-3-(4-formylanilino)-8-hydroxyocta-4,6-dienoic acid	(4E,6E)-3-(4-formyllanilino)-8-hydroxyocta-4,6-dienoic acid	Organic acids	有机酸	Organic acids	有机酸	C15H17NO4	3	0.5834	-	2876.14	1212.72	6974.66	40142.1	56722.2	56803.4	1.27391	0.00850594	0.0343674	13.8896	3.79593	up
MW0145862	Asn-Phe-Phe	L-天冬酰胺-L-苯丙氨酸-L-苯丙氨酸；	Amino acids and derivatives	氨基酸及其衍生物	Amino acids and derivatives	氨基酸及其衍生物	C22H26N4O5	3	0.5807	-	171470	152290	143959	219922	428145	423960	1.17471	0.0973451	0.195865	2.29203	1.19663	up
MW0158204	Trp-Met-Ala	色氨酸-甲硫氨酸-丙氨酸	Amino acids and derivatives	氨基酸及其衍生物	Amino acids and derivatives	氨基酸及其衍生物	C19H26N4O4S1	3	0.578	-	4851.2	3130.38	2196.45	26536.7	34020.1	45493.6	1.31924	0.0265374	0.0771691	10.4195	3.38122	up
MW0156783	Ser-His-Trp	丝氨酰-组氨酰-色氨酸	Amino acids and derivatives	氨基酸及其衍生物	Amino acids and derivatives	氨基酸及其衍生物	C20H24N6O5	3	0.578	-	19470.3	23587.3	18229	5658.89	6249.17	4611.84	1.3334	0.00747917	0.0313287	0.269551	-1.89137	down
MW0158585	Tyr-Pro-Gln	酪氨酸-脯氨酸-谷氨酰胺	Amino acids and derivatives	氨基酸及其衍生物	Amino acids and derivatives	氨基酸及其衍生物	C19H26N4O6	3	0.5773	-	106210	113946	117675	38514.2	17532.8	29672.5	1.28743	0.000999481	0.00887935	0.253735	-1.97861	down
MW0164153	1D-myo-inositol 2-(L-cysteiniumylamino)-2-deoxy-alpha-D-glucopyranoside	1D-肌醇 2-(L-半胱氨酰氨基)-2-脱氧-α-D-吡喃葡萄糖苷	Heterocyclic compounds	杂环化合物	Heterocyclic compounds	杂环化合物	C15H29N2O11S+	3	0.5765	-	3163.94	1732.29	888.16	8600.61	11301.6	4028.54	1.13287	0.0931533	0.190017	4.13712	2.04863	up
MW0158216	Trp-Phe-Glu	色氨酸-苯丙氨酸-谷氨酸	Amino acids and derivatives	氨基酸及其衍生物	Amino acids and derivatives	氨基酸及其衍生物	C25H28N4O6	3	0.5744	-	52454.4	16758.3	67074	107179	99855.4	122182	1.03967	0.0342095	0.0923571	2.41562	1.27239	up
MW0164095	11-Hydroxylaurate	11-羟基月桂酸酯	Lipids	脂质	Free fatty acids	游离脂肪酸	C12H23O3-	3	0.574	-	3306.49	6165.77	6073.91	25713	28015.1	27050.8	1.31625	9.66e-05	0.00251072	5.19606	2.37742	up
MW0148717	dTDP-3-amino-3,4,6-trideoxy-alpha-D-glucose	DTDP-3-氨基-3，4，6-三脱氧-D-葡萄糖；DTDP-3-氨基-3，4，6-三脱氧-α-D-葡萄糖	Nucleotides and derivatives	核苷酸及其衍生物	Nucleotides and derivatives	核苷酸及其衍生物	C16H27N3O13P2	3	0.574	-	82619.5	82545.3	69913.5	41818.7	36627.2	32630.8	1.31728	0.00235601	0.0143311	0.472509	-1.08159	down
MW0144493	Ala-Asn-His	L-丙氨酰-L-天冬酰胺酰-L-组氨酸	Amino acids and derivatives	氨基酸及其衍生物	Amino acids and derivatives	氨基酸及其衍生物	C13H20N6O5	3	0.5721	-	7684.2	4109.32	6947.38	19458.1	17334	9965.31	1.14984	0.0686051	0.152271	2.49494	1.31901	up
MW0145845	Asn-Met-Phe	L-天冬酰胺-L-甲硫氨酰-L-苯丙氨酸	Amino acids and derivatives	氨基酸及其衍生物	Amino acids and derivatives	氨基酸及其衍生物	C18H26N4O5S1	3	0.572	-	36834.2	57768.2	39710.6	16025.1	19748.2	13162	1.27348	0.0402175	0.103999	0.364337	-1.45665	down
MW0148216	Deinoxanthin	去甲黄黄素	Others	其它类	Ketone compounds	酮类化合物	C40H54O3	3	0.5703	-	32117.1	22272.1	10729.2	7261.15	5129.45	9515.51	1.10061	0.14004	0.256325	0.336404	-1.57173	down
MW0105650	Arg-Asn	L-精氨酰-L-天冬酰胺	Amino acids and derivatives	氨基酸及其衍生物	Amino acids and derivatives	氨基酸及其衍生物	C10H20N6O4	3	0.5696	-	5371.45	22515.4	24088.3	2553.32	2361.23	3176.93	1.16444	0.134544	0.249052	0.15568	-2.68335	down
MW0156934	Ser-Thr-Thr	L-丝氨酰-L-苏氨酰-L-苏氨酸	Amino acids and derivatives	氨基酸及其衍生物	Amino acids and derivatives	氨基酸及其衍生物	C11H21N3O7	3	0.5684	-	24738.5	26567.7	20391	83536.9	81001.8	106130	1.33453	0.0110545	0.041302	3.77517	1.91654	up
MW0105811	Asparagylcysteyllysine	天冬酰胺半胱氨酸	Amino acids and derivatives	氨基酸及其衍生物	Amino acids and derivatives	氨基酸及其衍生物	C13H25N5O5S	3	0.5672	-	1518.61	1814.1	902.76	33690.5	35399.9	36518.4	1.34373	0.000188763	0.00349615	24.9344	4.64007	up
MW0158121	Trp-Cys-Gln	色氨酸-半胱氨酸-谷氨酰胺	Amino acids and derivatives	氨基酸及其衍生物	Amino acids and derivatives	氨基酸及其衍生物	C19H25N5O5S1	3	0.5643	-	44277.3	42596.7	25505.2	93759.2	98189.1	68484.8	1.21591	0.0155786	0.0526932	2.31745	1.21254	up
MW0145467	Arg-Phe-Phe	L-苯丙氨酸，L-精氨酰-L-苯丙氨酰	Amino acids and derivatives	氨基酸及其衍生物	Amino acids and derivatives	氨基酸及其衍生物	C24H32N6O4	3	0.5632	-	2163.07	7469.06	9717.59	32221.3	26007	16358.3	1.12242	0.0392936	0.102302	3.85466	1.9466	up
MW0144561	Ala-Glu-Gly	L-丙氨酰-L-谷氨酰-甘氨酸	Amino acids and derivatives	氨基酸及其衍生物	Amino acids and derivatives	氨基酸及其衍生物	C10H17N3O6	3	0.5601	-	3346.64	4031.42	6201.72	37390.9	36602	36044.4	1.33546	9.7122e-05	0.00251072	8.10303	3.01846	up
MW0146223	Asp-Phe-Met	L-天冬氨酰-L-苯丙氨酰-L-蛋氨酸	Amino acids and derivatives	氨基酸及其衍生物	Amino acids and derivatives	氨基酸及其衍生物	C18H25N3O6S1	3	0.5581	-	188653	195218	178274	35984.1	42618.3	42236.3	1.3507	0.000205092	0.00371728	0.21496	-2.21786	down
MW0110079	Trp-Pro-Lys	色氨酸-脯氨酸-赖氨酸	Amino acids and derivatives	氨基酸及其衍生物	Amino acids and derivatives	氨基酸及其衍生物	C22H31N5O4	3	0.5569	-	31413.6	14768.7	30193.1	69300.5	182805	191818	1.22147	0.0872138	0.181027	5.81239	2.53913	up
MW0111875	Ncgc00384818-01_C27H30O11_	Ncgc00384818-01_C27H30O11_	Organic acids	有机酸	Organic acids	有机酸	C27H30O11	3	0.5565	-	2329.93	992.78	1987.37	13012	12371.6	12689.8	1.31173	0.000223555	0.00388591	7.17001	2.84198	up
MW0163163	[(Iminiomethyl)amino]acetate	[(亚氨基甲基)氨基]乙酸盐	Others	其它类	Lactones	内酯类化合物	C3H6N2O2	3	0.556	-	14207.6	11775.2	11617.4	30649.7	31258.6	36000.5	1.3352	0.00197278	0.0128198	2.60394	1.3807	up
MW0152530	Leu-Trp-Phe	L-亮氨酸-L-色氨酸-L-苯丙氨酸	Amino acids and derivatives	氨基酸及其衍生物	Amino acids and derivatives	氨基酸及其衍生物	C26H32N4O4	3	0.5556	-	1.04672e+06	574657	340854	216062	256608	179123	1.12375	0.168638	0.294235	0.33217	-1.59001	down
MW0166427	2-Keto-3,6-dideoxy-6-sulfogluconate	2-Keto-3,6-dideoxy-6-sulfogluconate	Organic acids	有机酸	Organic acids	有机酸	C6H8O8S-2	3	0.5528	-	121.26	304.39	532.26	1784.33	1429.32	1568.35	1.21615	0.00137371	0.0105686	4.99212	2.31965	up
MW0049245	NCGC00347533-02_C31H40O11_7,11-Methano-2H,4H-oxireno[1,8]cycloocta[1,2-f][2]benzopyran-8-acetic acid, 4-(3-furanyl)dodecahydro-alpha,11-dihydroxy-4a,7,9,9-tetramethyl-10-(2-methyl-1-oxopropoxy)-2,13-dioxo-, methyl ester, (alphaR,4R,4aR,7S,8S,10S,11S,11aR,12aS)-	NCGC00347533-02_C31H40O11_7,11-Methano-2H,4H-oxireno[1,8]cycloocta[1,2-f][2]benzopyran-8-乙酸, 4-(3-furanyl)dodecahydro-alpha,11-dihydroxy -4a,7,9,9-tetramethyl-10-(2-methyl-1-oxopropoxy)-2,13-dioxo-, 甲酯, (alphaR,4R,4aR,7S,8S,10S,11S,11aR, 12aS)-	Others	其它类	Lactones	内酯类化合物	C31H40O11	3	0.5518	-	61.18	45.32	98.8	962.65	105.15	902.38	1.06436	0.166624	0.292052	9.59659	3.26252	up
MW0155217	Phe-His-Tyr	苯丙氨酰-组氨酰-酪氨酸	Amino acids and derivatives	氨基酸及其衍生物	Amino acids and derivatives	氨基酸及其衍生物	C24H27N5O5	3	0.5514	-	47514.7	55372.8	38779.8	10954.2	6937.27	4834.04	1.30638	0.00775762	0.032143	0.160415	-2.64012	down
MW0004294	4-(3-Nitrophenoxy)benzene-1,2-dicarboxylic acid	4-(3-硝基苯氧基)苯-1,2-二羧酸	Benzene and substituted derivatives	苯及其衍生物	Benzene and substituted derivatives	苯及其衍生物	C14H9NO7	3	0.5496	-	285.77	326.14	312.11	1936.17	1180.83	1173.55	1.32163	0.0469766	0.115812	4.64335	2.21517	up
MW0152928	Lys-Cys-Met	L-赖氨酸-L-半胱氨酸-L-蛋氨酸	Amino acids and derivatives	氨基酸及其衍生物	Amino acids and derivatives	氨基酸及其衍生物	C14H28N4O4S2	3	0.5472	-	274382	245979	235488	80151.2	113858	121233	1.29516	0.00105887	0.00916602	0.41707	-1.26164	down
MW0106075	2-amino-4-(S-butylsulfonimidoyl)butanoate	2-氨基-4-(S-丁基磺酰亚胺基)丁酸酯	Amino acids and derivatives	氨基酸及其衍生物	Amino acids and derivatives	氨基酸及其衍生物	C8H18N2O3S	3	0.5466	-	42422.1	39061.8	43475.9	15271.5	10230.4	7348.21	1.29419	0.00105302	0.00915199	0.262885	-1.9275	down
MW0158149	Trp-Glu-Thr	色氨酸-谷氨酸-苏氨酸	Amino acids and derivatives	氨基酸及其衍生物	Amino acids and derivatives	氨基酸及其衍生物	C20H26N4O7	3	0.544	-	194454	192311	199607	91338.2	108393	85770.4	1.32968	0.0023147	0.0141561	0.486895	-1.03832	down
MW0165705	6-[3-Hydroxy-2-(3,5,7-trioxononanoyl)phenyl]-3,5-dioxohexanoate	6-[3-Hydroxy-2-(3,5,7-trioxonanoyl)phenyl]-3,5-dioxohexanoate	Phenolic acids	酚酸类	Phenolic acids	酚酸类	C21H21O9-	3	0.5436	-	1619.66	202.57	592.62	7379.91	4021.24	2097.01	1.09396	0.130757	0.243638	5.58965	2.48276	up
MW0105500	Alanylasparagylarginine	Ala Asn Arg	Amino acids and derivatives	氨基酸及其衍生物	Amino acids and derivatives	氨基酸及其衍生物	C13H25N7O5	3	0.5427	-	811.65	1062.16	4956.05	29793.7	20436.9	28213.1	1.2511	0.00606422	0.0266016	11.4854	3.52173	up
MW0158547	Tyr-Lys-Trp	酪氨酸-赖氨酸-色氨酸	Amino acids and derivatives	氨基酸及其衍生物	Amino acids and derivatives	氨基酸及其衍生物	C26H33N5O5	3	0.5421	-	12302.1	10155	14519.1	39719.5	41429.7	50260.6	1.32907	0.00512734	0.0237244	3.5539	1.8294	up
MW0156324	R-4-benzyl-3-((R)-3-hydroxy-2,2-dimethyloctanoyl)oxazolidin-2-one	R-4-苄基-3-(（R)-3-羟基-2,2-二甲基辛酰基）恶唑烷丁-2-酮	Benzene and substituted derivatives	苯及其衍生物	Benzene and substituted derivatives	苯及其衍生物	C20H29NO4	3	0.5406	-	47120.2	60147.9	50104.6	2515.6	12546.8	10730.8	1.20509	0.00119948	0.00980861	0.163899	-2.60912	down
MW0158580	Tyr-Phe-Val	酪氨酸-苯丙氨酸-缬氨酸	Amino acids and derivatives	氨基酸及其衍生物	Amino acids and derivatives	氨基酸及其衍生物	C23H29N3O5	3	0.5382	-	47098.8	48395.3	66339.3	278848	274232	293317	1.34299	1.18412e-05	0.00116551	5.23006	2.38683	up
MW0107076	Gly-Leu-Lys	甘氨酸-亮氨酸-赖氨酸	Amino acids and derivatives	氨基酸及其衍生物	Amino acids and derivatives	氨基酸及其衍生物	C14H28N4O4	3	0.5368	-	126468	119807	122407	46770.4	53546.8	48965.6	1.34895	1.25461e-05	0.00116551	0.404909	-1.30433	down
ZINC103550562	(R)-beta-(Dimethylamino)benzenepropanoic acid 2alpha,10beta-dihydroxy-9alpha-acetoxy-13-oxotaxa-4(20),11-dien-5alpha-yl ester	[（1R，2R，3R，5S，8R，9R，10R)-9-乙酰氧基-2，10-二羟基-8，12，15，15-四甲基-4-亚甲基-13-氧代-5-三环[9.3.1.03，8]十五-11-烯基]（3R)-3-(二甲氨基)-3-苯丙酸酯	Others	其它类	Lactones	内酯类化合物	C33H45NO7	3	0.5345	-	259.59	410.71	691.03	3544.68	1301.92	2081	1.21278	0.101034	0.201293	5.08885	2.34734	up
MW0165186	2-azaniumylprop-2-enoate	2-azaniumylprop-2-enoate	Others	其它类	Lactones	内酯类化合物	C3H5NO2	3	0.5339	-	19281.9	18015.9	22841.3	8437.54	9483.83	4756.25	1.23836	0.00357712	0.0185742	0.377086	-1.40703	down
MW0157611	Thr-Gln-Ile	苏氨酰-谷氨酰胺-异亮氨酸	Amino acids and derivatives	氨基酸及其衍生物	Amino acids and derivatives	氨基酸及其衍生物	C15H28N4O6	3	0.5338	-	45166.3	44723.1	44138.6	11418.2	29064.4	20256.9	1.14534	0.0404233	0.104318	0.453185	-1.14183	down
MW0142265	4-Carboxymuconolactone	2-羧基-2,5-二氢-5-氧呋喃-2-乙酸	Others	其它类	Lactones	内酯类化合物	C7H6O6	3	0.5327	-	29667.2	26872.5	36170.1	8131.61	2098.85	6166.36	1.2352	0.00275678	0.0157766	0.176862	-2.49931	down
MW0148779	dTDP-beta-L-4-epi-vancosamine	dTDP-L-表古可胺;dTDP-β-L-4-表古可胺; dTDP-3-氨基-2,3,6-三苯氧基-3-甲基-β-L-阿拉伯糖基己糖	Nucleotides and derivatives	核苷酸及其衍生物	Nucleotides and derivatives	核苷酸及其衍生物	C17H29N3O13P2	3	0.532	-	126523	131216	138982	43977.1	47511.9	53909.3	1.34363	7.83245e-05	0.00227316	0.366501	-1.44811	down
MW0164039	5-Guanidino-3-methyl-2-oxopentanoate	5-胍基-3-甲基-2-氧代戊酸酯；5-脒基-3-甲基-2-氧代戊酸酯	Others	其它类	Lactones	内酯类化合物	C7H13N3O3	3	0.5282	-	70049	68608.8	83040.6	3419.75	2752.47	10371.7	1.29802	0.0008799	0.00824241	0.0746235	-3.74423	down
MW0164819	Asterrate	星状体	Benzene and substituted derivatives	苯及其衍生物	Benzene and substituted derivatives	苯及其衍生物	C17H15O8-	3	0.5281	-	74.18	125.14	287.05	1526.67	1425.72	2937.55	1.27836	0.063851	0.144582	12.11	3.59813	up
MW0158459	Tyr-Glu-His	酪氨酸-谷氨酸-组氨酸	Amino acids and derivatives	氨基酸及其衍生物	Amino acids and derivatives	氨基酸及其衍生物	C20H25N5O7	3	0.5228	-	133036	107550	113814	357247	375879	420080	1.3427	0.00168579	0.0117463	3.25397	1.7022	up
MW0145622	Arnottin II	阿诺丁二世	Heterocyclic compounds	杂环化合物	Heterocyclic compounds	杂环化合物	C20H14O7	3	0.5161	-	2733.36	3655.47	1559.08	1261.26	922.64	1679.29	1.01802	0.142629	0.259876	0.486064	-1.04078	down
MW0145921	Asn-Trp-Tyr	L-天冬酰胺-L-色氨酸-L-酪氨酸	Amino acids and derivatives	氨基酸及其衍生物	Amino acids and derivatives	氨基酸及其衍生物	C24H27N5O6	3	0.5143	-	10726.4	21880.9	14793.5	33282.5	35519.5	27570.1	1.16824	0.0185217	0.0592566	2.03313	1.0237	up
MW0150330	Gly-Asp-Ser	甘氨酸-天门冬氨酸-丝氨酸	Amino acids and derivatives	氨基酸及其衍生物	Amino acids and derivatives	氨基酸及其衍生物	C9H15N3O7	3	0.5122	-	49257.2	29108.9	44725.2	2657.71	7207.27	3421.81	1.29901	0.0220886	0.0673854	0.107943	-3.21166	down
MW0155287	Phe-Met-Glu	苯丙氨酰-甲硫氨酰-谷氨酸	Amino acids and derivatives	氨基酸及其衍生物	Amino acids and derivatives	氨基酸及其衍生物	C19H27N3O6S1	3	0.5116	-	556586	572568	534827	281604	201021	286545	1.29847	0.00376326	0.0192486	0.462247	-1.11326	down
MW0148000	Cys-Gln-Leu	半胱氨酸-谷酰氨-亮氨酸	Amino acids and derivatives	氨基酸及其衍生物	Amino acids and derivatives	氨基酸及其衍生物	C14H26N4O5S1	3	0.5099	-	5547.6	3791.46	1898.91	10622.1	7579.6	8871.23	1.118	0.0195021	0.0616051	2.40906	1.26847	up
MW0152362	Leu-His-Phe	L-亮氨酸-L-组氨酸-L-苯丙氨酸	Amino acids and derivatives	氨基酸及其衍生物	Amino acids and derivatives	氨基酸及其衍生物	C21H29N5O4	3	0.5079	-	122310	191875	139608	8290.98	29177.5	18137	1.277	0.0176693	0.0574914	0.122535	-3.02874	down
MW0151591	Ile-Thr-Cys	L-异亮氨酸-L-苏氨酸-L-半胱氨酸	Amino acids and derivatives	氨基酸及其衍生物	Amino acids and derivatives	氨基酸及其衍生物	C13H25N3O5S1	3	0.5073	-	2801.42	1388.85	1032.46	3157.1	4911.04	5799.56	1.12515	0.0442909	0.111043	2.65526	1.40885	up
MW0010237	7-Deshydroxypyrogallin-4-carboxylic acid	7-去氧吡咯啉-4-羧酸	Organic acids	有机酸	Organic acids	有机酸	C12H8O6	3	0.5062	-	336.48	631.35	984.87	5129.2	5089.43	5690.11	1.30278	6.68461e-05	0.0021345	8.14705	3.02628	up
MW0151552	Ile-Phe-Val	L-异亮氨酸-L-苯丙氨酸-L-缬氨酸	Amino acids and derivatives	氨基酸及其衍生物	Amino acids and derivatives	氨基酸及其衍生物	C20H31N3O4	3	0.5043	-	636.17	366.8	609.75	22292	22073.5	17885.4	1.34765	0.00487115	0.022881	38.5999	5.27053	up
ZINC33832628	2-(beta-D-Glucopyranosyl)-10-hydroxy-4,5-[1,3]butadieno-6,7-(methylenebisoxy)-2-azaacenaphthylene-1(2H)-one	16-羟基-10-[（2R，3R，4S，5S，6R)-3，4，5-三羟基-6-(羟甲基）恶烷-2-基]-3，5-二氧杂-10-氮杂五环[9.7.1.02，6.08，19.013，18]十九-1（18）2（6）7，11（19）12，14，16-庚烯-9-酮	Benzene and substituted derivatives	苯及其衍生物	Benzene and substituted derivatives	苯及其衍生物	C22H19NO9	3	0.5038	-	1587.72	1067.1	605.44	11543.9	6504.79	3635.97	1.22708	0.115142	0.22177	6.65121	2.73362	up
MW0150323	Gly-Asp-Gln	甘氨酸-天门冬氨酸-谷酰胺	Amino acids and derivatives	氨基酸及其衍生物	Amino acids and derivatives	氨基酸及其衍生物	C11H18N4O7	3	0.5036	-	11173.6	3099.25	2633.87	63062.9	25385.7	66664.8	1.22553	0.06751	0.150612	9.17466	3.19765	up
MW0130163	3-[(2S,3R,4S,5R,6R)-4-[(2S,3R,4S,5S,6R)-4,5-dihydroxy-6-(hydroxymethyl)-3-[(2S,3R,4S,5R)-3,4,5-trihydroxyoxan-2-yl]oxyoxan-2-yl]oxy-3,5-dihydroxy-6-(hydroxymethyl)oxan-2-yl]oxy-2-(3,4-dihydroxyphenyl)-5,7-dihydroxychromen-4-one	3-[(2S,3R,4S,5R,6R)-4-[(2S,3R,4S,5S,6R)-4,5-二羟基-6-(羟甲基)-3-[(2S,3R, 4S,5R)-3,4,5-trihydroxyoxan-2-yl]oxyoxan-2-yl]oxy-3,5-dihydroxy-6-(hydroxymethyl)oxan-2-yl]oxy-2-(3,4 -二羟基苯基)-5,7-二羟基色素-4-一	Benzene and substituted derivatives	苯及其衍生物	Benzene and substituted derivatives	苯及其衍生物	C32H38O21	3	0.5011	-	33618.5	37070.8	34875.1	17189.8	4701.49	11541	1.16188	0.0161672	0.0541209	0.316701	-1.65881	down
MEDP2164	2,2-Dihydroxymethyl-1-azabicyclo[2.2.2]octan-3-one	2,2-二羟基甲基-1-氮杂双环[2.2.2]辛-3-酮	Heterocyclic compounds	杂环化合物	Heterocyclic compounds	杂环化合物	C9H15NO3	3	0.702	5608-24-2	216.48	3366.88	1458.05	37941.8	41680.3	45274.9	1.24108	0.000724754	0.00741988	24.7742	4.63077	up
MW0116629	1,3-Benzenedisulfonic acid,4-[2-[4-formyl-5-hydroxy-6-methyl-3-[(phosphonooxy)methyl]-2-pyridinyl]diazenyl]-	1,3-Benzenedisulfonic acid,4-[2-[4-formyl-5-hydroxy-6-methyl-3-[(phosphonooxy)methyl]-2-pyridinyl]diazenyl]-	Others	其它类	Others	其它	C14H14N3O12PS2	3	0.5767	149017-66-3	908.21	884.29	1178.5	3268.05	3496.73	2899.47	1.3336	0.00132002	0.0103019	3.25286	1.70171	up
MW0146296	Asp-Tyr-Asn-Leu-Leu	Asp-Tyr-Asn-Leu-Leu	Amino acids and derivatives	氨基酸及其衍生物	Amino acids and derivatives	氨基酸及其衍生物	C29H44N6O10	2	0.9285	-	53537.8	43540.2	46271.1	18146.1	19573.6	5023.97	1.13514	0.0060484	0.0265501	0.298179	-1.74575	down
MW0158350	Tyr-Ala-Asp-Lys	酪氨酸-丙氨酸-天冬氨酸-赖氨酸	Amino acids and derivatives	氨基酸及其衍生物	Amino acids and derivatives	氨基酸及其衍生物	C22H33N5O8	2	0.9237	-	45130.4	42106.7	37209	245706	272529	273788	1.35143	0.0009615	0.0087545	6.36438	2.67002	up
MW0157677	Thr-Ile-Asp-Phe-Glu	Thr-Ile-Asp-Phe-Glu	Amino acids and derivatives	氨基酸及其衍生物	Amino acids and derivatives	氨基酸及其衍生物	C28H41N5O11	2	0.9145	-	46787.3	64100.6	48977.9	122683	122043	120191	1.31901	0.00555916	0.0251456	2.28265	1.19071	up
MW0155082	Phe-Ala-Thr-Asp-Asp	Phe-Ala-Thr-Asp-Asp	Amino acids and derivatives	氨基酸及其衍生物	Amino acids and derivatives	氨基酸及其衍生物	C24H33N5O11	2	0.9062	-	40172.7	40196.9	43198.2	79870.1	84258.7	85370.1	1.34958	0.000124713	0.00279573	2.01912	1.01373	up
MW0151484	Ile-Leu-Arg-Lys	Ile-Leu-Arg-Lys	Amino acids and derivatives	氨基酸及其衍生物	Amino acids and derivatives	氨基酸及其衍生物	C24H48N8O5	2	0.9048	-	408400	244257	220422	162952	88987.4	36950.4	1.07851	0.0599438	0.137507	0.330887	-1.59559	down
MW0158453	Tyr-Glu-Asp-Tyr-Val	酪氨酸-谷氨酸-天冬氨酸-酪氨酸-缬氨酸	Amino acids and derivatives	氨基酸及其衍生物	Amino acids and derivatives	氨基酸及其衍生物	C32H41N5O12	2	0.9036	-	19750.5	14979.4	23375.3	219185	218377	210043	1.34717	1.21086e-06	0.000557991	11.1454	3.47837	up
MW0145746	Asn-Glu-Thr-Asp-Leu	Asn-Glu-Thr-Asp-Leu	Amino acids and derivatives	氨基酸及其衍生物	Amino acids and derivatives	氨基酸及其衍生物	C23H38N6O12	2	0.8919	-	19286.1	14272.7	5059.98	38821.9	32990.5	28256.8	1.07555	0.0196299	0.0618584	2.59121	1.37362	up
MW0150854	His-Asn-Ile-Asp	组氨酸-天门冬酰氨-异亮氨酸-天门冬氨酸	Amino acids and derivatives	氨基酸及其衍生物	Amino acids and derivatives	氨基酸及其衍生物	C20H31N7O8	2	0.8782	-	1216.13	7552.16	2432.04	41562.7	42353.1	40703.6	1.26029	0.00162098	0.011513	11.1264	3.47592	up
MW0146257	Asp-Ser-Glu-Glu-Glu	Asp-Ser-Glu-Glu-Glu	Amino acids and derivatives	氨基酸及其衍生物	Amino acids and derivatives	氨基酸及其衍生物	C22H33N5O15	2	0.8735	-	43051.8	24680.8	50642.1	206329	191324	211207	1.3108	0.000111854	0.00269737	5.14349	2.36275	up
MW0159213	Val-Tyr-Gln-Lys	Val-Tyr-Gln-Lys	Amino acids and derivatives	氨基酸及其衍生物	Amino acids and derivatives	氨基酸及其衍生物	C25H40N6O7	2	0.8724	-	131492	129116	116667	253558	263893	273140	1.34587	6.2335e-05	0.00212651	2.09553	1.06731	up
MW0144494	Ala-Asn-His-Asp	Ala-Asn-His-Asp	Amino acids and derivatives	氨基酸及其衍生物	Amino acids and derivatives	氨基酸及其衍生物	C17H25N7O8	2	0.8685	-	9429.61	13577.8	10661.6	28292.8	37234.4	20203.2	1.23526	0.0641108	0.14512	2.54627	1.34839	up
MW0157583	Thr-Asp-Asn-Asp	Thr-Asp-Asn-Asp	Amino acids and derivatives	氨基酸及其衍生物	Amino acids and derivatives	氨基酸及其衍生物	C16H25N5O11	2	0.8659	-	49474	51829.7	31385	135049	90023.8	128074	1.2516	0.0202068	0.0631255	2.66147	1.41222	up
MW0151222	HoPhe-Ser-OH	HoPhe-Ser-OH	Others	其它类	Lactones	内酯类化合物	C18H18N2O7	2	0.8657	-	46906.7	24248.9	48180.7	173560	183133	198613	1.30183	0.000172008	0.00336815	4.65327	2.21825	up
MW0149758	Gln-Lys-Leu-Glu	谷酰氨-赖氨酸-亮氨酸-谷氨酸	Amino acids and derivatives	氨基酸及其衍生物	Amino acids and derivatives	氨基酸及其衍生物	C22H40N6O8	2	0.8654	-	24723	21501.5	19263.2	72645	81107.6	77928.3	1.34445	0.000143012	0.00303584	3.53778	1.82285	up
MW0158347	Tyr-Ala-Arg-Asp-Glu	酪氨酸-丙氨酸-精氨酸-天冬氨酸	Amino acids and derivatives	氨基酸及其衍生物	Amino acids and derivatives	氨基酸及其衍生物	C27H40N8O11	2	0.8643	-	40407.2	28365.7	16444.1	89606.4	83618.9	69212.7	1.21469	0.00493053	0.0231393	2.84495	1.5084	up
MW0152337	Leu-Gly-Arg-Leu-Val	Leu-Gly-Arg-Leu-Val	Amino acids and derivatives	氨基酸及其衍生物	Amino acids and derivatives	氨基酸及其衍生物	C25H48N8O6	2	0.8536	-	188436	160598	117144	47082.2	44437.7	47647.2	1.31853	0.0341042	0.092115	0.298528	-1.74406	down
MW0150305	Gly-Arg-Ser-Asp-Asp	甘氨酸-精氨酸-丝氨酸-天门冬氨酸-天门冬氨酸	Amino acids and derivatives	氨基酸及其衍生物	Amino acids and derivatives	氨基酸及其衍生物	C19H32N8O11	2	0.8519	-	8521.91	2752.34	7867.53	48869.2	49416.9	64603.8	1.28486	0.00619969	0.0271043	8.50965	3.0891	up
MW0155119	Phe-Asp-Ala-Glu	Phe-Asp-Ala-Glu	Amino acids and derivatives	氨基酸及其衍生物	Amino acids and derivatives	氨基酸及其衍生物	C21H28N4O9	2	0.851	-	26734.4	18899.1	25373.2	100661	114862	120117	1.33907	0.00140964	0.0107307	4.72687	2.24089	up
MW0158167	Trp-His-Thr-Ile-Ile	Trp-His-Thr-Ile-Ile	Amino acids and derivatives	氨基酸及其衍生物	Amino acids and derivatives	氨基酸及其衍生物	C33H48N8O7	2	0.8507	-	13808.6	13649.2	20767.3	67606.6	46968.8	72432.7	1.30349	0.0201535	0.0629894	3.87782	1.95524	up
MW0152200	Leu-Ala-His-Tyr-Asn	Leu-Ala-His-Tyr-Asn	Amino acids and derivatives	氨基酸及其衍生物	Amino acids and derivatives	氨基酸及其衍生物	C28H40N8O8	2	0.8481	-	17798	16558.3	18378	64706.5	72666.5	64023.8	1.35107	0.00233102	0.0142291	3.81908	1.93323	up
MW0146084	Asp-Gln-Leu-Thr-Glu	Asp-Gln-Leu-Thr-Glu	Amino acids and derivatives	氨基酸及其衍生物	Amino acids and derivatives	氨基酸及其衍生物	C24H40N6O12	2	0.8463	-	1273.24	768.14	805.29	4280.44	2069.14	1282.48	1.02331	0.214624	0.348818	2.68105	1.4228	up
MW0138676	Kaempferol-3-O-alpha-L-rhamnopyranosyl(1-2)-beta-D-glucopyranoside-7-O-alpha-L-rhamnopyranoside	Kaempferol-3-O-alpha-L-rhamnopyranosyl(1-2)-beta-D-glucopyranoside-7-O-alpha-L-rhamnopyranoside	Flavonoids	黄酮	Flavones	黄酮	C33H40O19	2	0.8442	-	18010.6	8413.71	10670.3	39124.8	26209.4	54178.8	1.20067	0.0632215	0.143588	3.22184	1.68788	up
MW0158951	Val-Cys-Ala-Asp-Met	Val-Cys-Ala-Asp-Met	Amino acids and derivatives	氨基酸及其衍生物	Amino acids and derivatives	氨基酸及其衍生物	C20H35N5O8S2	2	0.8414	-	5067.68	4054.86	1648.81	6722.65	22055.5	9542.21	1.06267	0.186158	0.316826	3.55762	1.83091	up
MW0144639	Ala-Leu-Leu-Leu-Trp	Ala-Leu-Leu-Leu-Trp	Amino acids and derivatives	氨基酸及其衍生物	Amino acids and derivatives	氨基酸及其衍生物	C32H50N6O6	2	0.8401	-	38142.4	14739.8	42072.6	2342.29	2210.67	9629.6	1.17712	0.0776185	0.166424	0.149361	-2.74312	down
MW0155977	Pro-Pro-His	Pro-Pro-His	Amino acids and derivatives	氨基酸及其衍生物	Amino acids and derivatives	氨基酸及其衍生物	C16H23N5O4	2	0.839	-	13676.4	1911.17	10381.2	94507.9	94601.9	106121	1.23378	7.10129e-05	0.00219836	11.3687	3.50699	up
MW0157623	Thr-Glu-Asn-Glu-Val	Thr-Glu-Asn-Glu-Val	Amino acids and derivatives	氨基酸及其衍生物	Amino acids and derivatives	氨基酸及其衍生物	C23H38N6O12	2	0.83	-	1260.41	1470.01	138.37	7444.3	4457.55	6483.79	1.1129	0.0148886	0.050996	6.40885	2.68007	up
MW0153169	Lys-Tyr-Ala-Asp	Lys-Tyr-Ala-Asp	Amino acids and derivatives	氨基酸及其衍生物	Amino acids and derivatives	氨基酸及其衍生物	C22H33N5O8	2	0.8243	-	27553.5	14859.6	19326.4	95804.8	115083	122133	1.3215	0.00236988	0.0143584	5.39397	2.43135	up
MW0144774	Ala-Tyr-Glu-Asp	Ala-Tyr-Glu-Asp	Amino acids and derivatives	氨基酸及其衍生物	Amino acids and derivatives	氨基酸及其衍生物	C21H28N4O10	2	0.8235	-	1820.8	5306.1	6644.93	58729.3	58126.6	64210.7	1.29975	3.93768e-05	0.00171804	13.1476	3.71673	up
MW0159223	Val-Tyr-Lys-Val-Leu	Val-Tyr-Lys-Val-Leu	Amino acids and derivatives	氨基酸及其衍生物	Amino acids and derivatives	氨基酸及其衍生物	C31H52N6O7	2	0.8233	-	69310.2	62063	65801.9	15366.8	40591.3	41600.2	1.04381	0.0536608	0.126946	0.49478	-1.01514	down
MW0151208	HoPhe-Abu-OH	HoPhe-Abu-OH	Others	其它类	Lactones	内酯类化合物	C19H20N2O6	2	0.8137	-	40075.6	41692.8	45384.7	1479.29	1866.75	1166.25	1.35016	0.00126125	0.010073	0.0354871	-4.81656	down
MW0157545	Thr-Arg-Gln-Glu	Thr-Arg-Gln-Glu	Amino acids and derivatives	氨基酸及其衍生物	Amino acids and derivatives	氨基酸及其衍生物	C20H36N8O9	2	0.81	-	55.91	563.51	176.91	671.18	858.11	852.95	1.00784	0.0590202	0.136122	2.99152	1.58088	up
MW0156823	Ser-Leu-Lys-Glu	Ser-Leu-Lys-Glu	Amino acids and derivatives	氨基酸及其衍生物	Amino acids and derivatives	氨基酸及其衍生物	C20H37N5O8	2	0.8066	-	726.84	1442.62	985.58	732.55	236.86	185.69	1.05384	0.0727022	0.158816	0.366113	-1.44964	down
MW0146110	Asp-Glu-Val-Phe-Asp	Asp-Glu-Val-Phe-Asp	Amino acids and derivatives	氨基酸及其衍生物	Amino acids and derivatives	氨基酸及其衍生物	C27H37N5O12	2	0.8033	-	54152.6	50290.3	50469.8	532595	482209	497691	1.35417	0.00100784	0.00889006	9.76353	3.2874	up
MW0155896	Pro-Ile-His-Asp-Arg	Pro-Ile-His-Asp-Arg	Amino acids and derivatives	氨基酸及其衍生物	Amino acids and derivatives	氨基酸及其衍生物	C27H44N10O8	2	0.7887	-	50309.4	46353.2	54527.7	16644.9	12215.5	41310.2	1.05106	0.0879562	0.182161	0.464121	-1.10743	down
MW0144518	Ala-Asp-Phe-Asp	Ala-Asp-Phe-Asp	Amino acids and derivatives	氨基酸及其衍生物	Amino acids and derivatives	氨基酸及其衍生物	C20H26N4O9	2	0.7859	-	200557	203531	191458	398985	427159	424773	1.35096	0.000441731	0.00555453	2.10045	1.0707	up
MW0158615	Tyr-Thr-Ala-Glu	酪氨酸-苏氨酸-丙氨酸-谷氨酸	Amino acids and derivatives	氨基酸及其衍生物	Amino acids and derivatives	氨基酸及其衍生物	C21H30N4O9	2	0.7844	-	32698.7	35320.1	26276.3	342197	340822	373906	1.35091	0.000622551	0.00680202	11.2087	3.48655	up
MW0155123	Phe-Asp-Cys-Asn-Asn	Phe-Asp-Cys-Asn-Asn	Amino acids and derivatives	氨基酸及其衍生物	Amino acids and derivatives	氨基酸及其衍生物	C24H33N7O10S	2	0.7828	-	35622.4	32127.1	33284.5	152927	165779	181548	1.35135	0.00342742	0.0181447	4.95135	2.30782	up
MW0153524	Met-Cys-Asp-Phe-Thr	Met-Cys-Asp-Phe-Thr	Amino acids and derivatives	氨基酸及其衍生物	Amino acids and derivatives	氨基酸及其衍生物	C25H37N5O9S2	2	0.7796	-	51813.8	45574.4	42374.4	96078	89124.9	96907.4	1.3326	0.000233251	0.00394887	2.0185	1.01328	up
MW0144576	Ala-Glu-Val-Asp	Ala-Glu-Val-Asp	Amino acids and derivatives	氨基酸及其衍生物	Amino acids and derivatives	氨基酸及其衍生物	C17H28N4O9	2	0.7788	-	23725.2	21621.2	26073.8	167854	180255	186499	1.35237	0.000744749	0.00748317	7.48537	2.90407	up
MW0145775	Asn-His-Phe-Asp	Asn-His-Phe-Asp	Amino acids and derivatives	氨基酸及其衍生物	Amino acids and derivatives	氨基酸及其衍生物	C23H29N7O8	2	0.7761	-	13188.7	11218.8	22662.9	43246.2	51378.4	47929.1	1.26716	0.00287423	0.0162436	3.02852	1.59862	up
MW0158706	TyrMe-Lys-OH	TyrMe-Lys-OH	Amino acids and derivatives	氨基酸及其衍生物	Amino acids and derivatives	氨基酸及其衍生物	C22H27N3O7	2	0.7751	-	46283	37641.1	41834.1	11655.6	22905.7	13866.1	1.24683	0.00500623	0.0233636	0.385084	-1.37676	down
MW0159068	Val-Leu-Leu-Ser-Cys	Val-Leu-Leu-Ser-Cys	Amino acids and derivatives	氨基酸及其衍生物	Amino acids and derivatives	氨基酸及其衍生物	C23H43N5O7S	2	0.7736	-	48.54	108.75	43.96	94.29	187.95	458.45	1.00156	0.238711	0.375164	3.68045	1.87988	up
MW0151004	His-Leu-Val-Leu-Arg	组氨酸-亮氨酸-缬氨酸-亮氨酸-精氨酸	Amino acids and derivatives	氨基酸及其衍生物	Amino acids and derivatives	氨基酸及其衍生物	C29H52N10O6	2	0.7726	-	20249.5	40050.5	41978.4	146880	155884	209637	1.29257	0.0123519	0.0445867	5.00986	2.32477	up
MW0146027	Asp-Arg-Lys-Lys	Asp-Arg-Lys-Lys	Amino acids and derivatives	氨基酸及其衍生物	Amino acids and derivatives	氨基酸及其衍生物	C22H43N9O7	2	0.7663	-	19521.5	21829.3	15109.7	65376.3	56025.7	57061.4	1.32711	0.000694641	0.00730584	3.16085	1.66031	up
MW0145771	Asn-His-Ile-Arg	Asn-His-Ile-Arg	Amino acids and derivatives	氨基酸及其衍生物	Amino acids and derivatives	氨基酸及其衍生物	C22H38N10O6	2	0.7663	-	49950.3	52832.3	49489.1	14169.9	16593.8	16898.9	1.34788	1.84008e-05	0.00134408	0.31301	-1.67572	down
MW0150283	Gly-Ala-Asn-Phe-Glu	甘氨酸-丙氨酸-天门冬酰氨-苯丙氨酸-谷氨酸	Amino acids and derivatives	氨基酸及其衍生物	Amino acids and derivatives	氨基酸及其衍生物	C23H32N6O9	2	0.7662	-	22297.3	31143.3	22086.6	62284.1	65922.2	59974.8	1.31426	0.00121835	0.00987594	2.49157	1.31705	up
MW0144553	Ala-Glu-Ala-Leu-Glu	Ala-Glu-Ala-Leu-Glu	Amino acids and derivatives	氨基酸及其衍生物	Amino acids and derivatives	氨基酸及其衍生物	C22H37N5O10	2	0.7627	-	8468.13	9473.9	8267.21	49912.3	60345.8	72654.1	1.34529	0.0152288	0.0518879	6.97892	2.803	up
MW0156682	Ser-Asp-Ile-Glu-Val	Ser-Asp-Ile-Glu-Val	Amino acids and derivatives	氨基酸及其衍生物	Amino acids and derivatives	氨基酸及其衍生物	C23H39N5O11	2	0.7609	-	22371.1	15574.7	13380.4	130577	135639	133158	1.34034	3.34331e-05	0.00167509	7.78111	2.95998	up
MW0151427	Ile-Glu-Val-Asp-Leu	Ile-Glu-Val-Asp-Leu	Amino acids and derivatives	氨基酸及其衍生物	Amino acids and derivatives	氨基酸及其衍生物	C26H45N5O10	2	0.7603	-	86070.1	90436	85677.6	21201.8	19115.4	16955.9	1.34977	6.23303e-06	0.000949365	0.218446	-2.19465	down
MW0155244	Phe-Leu-Asp-Lys	Phe-Leu-Asp-Lys	Amino acids and derivatives	氨基酸及其衍生物	Amino acids and derivatives	氨基酸及其衍生物	C25H39N5O7	2	0.7602	-	117232	116933	124739	43079.2	45270.5	22887.2	1.27353	0.00355516	0.0185193	0.309935	-1.68996	down
MW0157802	Thr-Ser-Phe-Asp	Thr-Ser-Phe-Asp	Amino acids and derivatives	氨基酸及其衍生物	Amino acids and derivatives	氨基酸及其衍生物	C20H28N4O9	2	0.7596	-	34972.7	30862.8	34279.9	306668	312234	320900	1.35402	6.5843e-05	0.00212651	9.38718	3.23069	up
MW0156736	Ser-Glu-Leu-Ser-Met	Ser-Glu-Leu-Ser-Met	Amino acids and derivatives	氨基酸及其衍生物	Amino acids and derivatives	氨基酸及其衍生物	C22H39N5O10S	2	0.7582	-	27738.6	12726.4	26072.4	69327	44607.4	45197.7	1.14221	0.0421118	0.107783	2.39162	1.25799	up
MW0152262	Leu-Asp-Glu-Lys	Leu-Asp-Glu-Lys	Amino acids and derivatives	氨基酸及其衍生物	Amino acids and derivatives	氨基酸及其衍生物	C21H37N5O9	2	0.758	-	13741.5	12553.2	14223.2	34980.8	40499	36814.3	1.34662	0.00242565	0.0146281	2.77147	1.47065	up
MW0151609	Ile-Thr-Val-Lys-Leu	Ile-Thr-Val-Lys-Leu	Amino acids and derivatives	氨基酸及其衍生物	Amino acids and derivatives	氨基酸及其衍生物	C27H52N6O7	2	0.7575	-	50413.5	39199.5	24412.4	59294.2	69771.8	138637	1.05018	0.167665	0.293226	2.34775	1.23128	up
MW0145948	Asn-Val-Glu-Glu	Asn-Val-Glu-Glu	Amino acids and derivatives	氨基酸及其衍生物	Amino acids and derivatives	氨基酸及其衍生物	C19H31N5O10	2	0.7573	-	20230.3	10439.5	25900.2	54040.4	52284.2	69007.4	1.22203	0.00511007	0.0236782	3.09939	1.63198	up
MW0159139	Val-Pro-Glu-Lys-Lys	Val-Pro-Glu-Lys-Lys	Amino acids and derivatives	氨基酸及其衍生物	Amino acids and derivatives	氨基酸及其衍生物	C27H49N7O8	2	0.7565	-	120679	116002	100526	55982	54075.7	58066.3	1.33577	0.00951331	0.0374144	0.498579	-1.00411	down
MW0146199	Asp-Lys-Tyr-Asp	Asp-Lys-Tyr-Asp	Amino acids and derivatives	氨基酸及其衍生物	Amino acids and derivatives	氨基酸及其衍生物	C23H33N5O10	2	0.7556	-	12824.5	26226.4	28002	51418.3	36472.5	52951.3	1.10722	0.0262063	0.076535	2.10046	1.07071	up
MW0008766	N1,N1-dimethyl-4-[[4-(dimethylamino)phenyl](4-nitrophenyl)methyl]aniline	N1,N1-dimethyl-4-[[4-(dimethylamino)phenyl](4-nitrophenyl)methyl]aniline	Benzene and substituted derivatives	苯及其衍生物	Benzene and substituted derivatives	苯及其衍生物	C23H25N3O2	2	0.7551	-	9403.03	28982.2	11136.7	42189.5	48495.9	47375.8	1.15634	0.0328502	0.0895427	2.78788	1.47917	up
MW0158300	Trp-HoPhe-OH	Trp-HoPhe-OH	Amino acids and derivatives	氨基酸及其衍生物	Amino acids and derivatives	氨基酸及其衍生物	C27H25N3O6	2	0.7548	-	211666	213335	196339	483285	448301	504824	1.34759	0.00169396	0.0117654	2.31179	1.20901	up
MW0152891	Lys-Asn-Ser-Asp	Lys-Asn-Ser-Asp	Amino acids and derivatives	氨基酸及其衍生物	Amino acids and derivatives	氨基酸及其衍生物	C17H30N6O9	2	0.7548	-	4406.72	2202.27	2101.63	14593.4	17505.9	17956.3	1.30621	0.000736544	0.0074605	5.74651	2.52269	up
MW0146227	Asp-Phe-Ser-Arg	Asp-Phe-Ser-Arg	Amino acids and derivatives	氨基酸及其衍生物	Amino acids and derivatives	氨基酸及其衍生物	C22H33N7O8	2	0.7535	-	354.43	732.14	1237.13	1113.51	2737.62	3866.51	1.02602	0.1435	0.260949	3.32127	1.73174	up
MW0155183	Phe-Glu-Lys-Ala-Ala	Phe-Glu-Lys-Ala-Ala	Amino acids and derivatives	氨基酸及其衍生物	Amino acids and derivatives	氨基酸及其衍生物	C26H40N6O8	2	0.7529	-	2062.5	3705.85	542.83	4068.6	12741.9	11048.9	1.04848	0.101289	0.201616	4.41428	2.14218	up
MW0145402	Arg-Ile-Thr-Val-Lys	Arg-Ile-Thr-Val-Lys	Amino acids and derivatives	氨基酸及其衍生物	Amino acids and derivatives	氨基酸及其衍生物	C27H53N9O7	2	0.7524	-	1927.62	1577.86	2057.93	665.03	855.95	1149.6	1.22593	0.00867184	0.0348722	0.480026	-1.05882	down
MW0145339	Arg-Glu-Ala-Phe-Arg	Arg-Glu-Ala-Phe-Arg	Amino acids and derivatives	氨基酸及其衍生物	Amino acids and derivatives	氨基酸及其衍生物	C29H47N11O8	2	0.7508	-	529.52	7272.8	100.61	16245.5	10666.5	16676.8	1.03554	0.0181183	0.0585423	5.51552	2.4635	up
MW0156940	Ser-Trp-Asp-Pro-Phe	Ser-Trp-Asp-Pro-Phe	Amino acids and derivatives	氨基酸及其衍生物	Amino acids and derivatives	氨基酸及其衍生物	C32H38N6O9	2	0.7503	-	81928.3	39413.8	18589.5	128595	139906	143721	1.1174	0.0335543	0.0910419	2.94589	1.5587	up
MW0155263	Phe-Leu-Val-Met-Met	Phe-Leu-Val-Met-Met	Amino acids and derivatives	氨基酸及其衍生物	Amino acids and derivatives	氨基酸及其衍生物	C30H49N5O6S2	2	0.7503	-	100565	109965	102452	44339.3	38123.4	40813.5	1.34679	0.000163458	0.00326966	0.393876	-1.34419	down
MW0145884	Asn-Ser-Glu-Asp-Thr	Asn-Ser-Glu-Asp-Thr	Amino acids and derivatives	氨基酸及其衍生物	Amino acids and derivatives	氨基酸及其衍生物	C20H32N6O13	2	0.7501	-	6435.94	6406.11	5445.93	24475.5	11764.6	21442.9	1.24897	0.0746267	0.161878	3.15414	1.65725	up
MW0152975	Lys-Gly-Gly-Asn-Glu	Lys-Gly-Gly-Asn-Glu	Amino acids and derivatives	氨基酸及其衍生物	Amino acids and derivatives	氨基酸及其衍生物	C19H33N7O9	2	0.7486	-	2380.88	1880.73	7021.07	40540.8	64835.8	30992.6	1.27881	0.0504068	0.121323	12.0866	3.59534	up
MW0154295	Nap-Trp-OH	Nap-Trp-OH	Amino acids and derivatives	氨基酸及其衍生物	Amino acids and derivatives	氨基酸及其衍生物	C29H23N3O6	2	0.7469	-	25028.2	50591.6	42755.8	4937.94	15083.4	19310.6	1.06925	0.0525342	0.124867	0.332263	-1.5896	down
MW0146152	Asp-Ile-Lys-Glu-Met	Asp-Ile-Lys-Glu-Met	Amino acids and derivatives	氨基酸及其衍生物	Amino acids and derivatives	氨基酸及其衍生物	C26H46N6O10S	2	0.7456	-	1600.8	1555.46	3846.5	5189.27	4739.76	4824.08	1.10432	0.0716026	0.15726	2.10676	1.07502	up
MW0145573	Arg-Val-Ser-Leu-Asp	Arg-Val-Ser-Leu-Asp	Amino acids and derivatives	氨基酸及其衍生物	Amino acids and derivatives	氨基酸及其衍生物	C24H44N8O9	2	0.7451	-	280.4	295.98	259.78	123.84	113.98	127.66	1.3449	0.00165421	0.011626	0.437093	-1.19399	down
MW0154403	Neu5Ac2-6Gal1-4GlcNAcSp	Neu5Ac2-6Gal1-4GlcNAcSp	Others	其它类	Saccharides	糖类	C27H45N5O19	2	0.7442	-	3.89165e+06	5.44407e+06	5.16136e+06	1.36848e+06	1.30856e+06	1.43888e+06	1.33508	0.0180017	0.0582812	0.283914	-1.81647	down
MW0146239	Asp-Pro-His	Asp-Pro-His	Amino acids and derivatives	氨基酸及其衍生物	Amino acids and derivatives	氨基酸及其衍生物	C15H21N5O6	2	0.7441	-	621021	583312	618333	1.22614e+06	1.35075e+06	1.31785e+06	1.3491	0.00129647	0.0102215	2.13684	1.09548	up
MW0152437	Leu-Met-Lys-Asp-Gly	Leu-Met-Lys-Asp-Gly	Amino acids and derivatives	氨基酸及其衍生物	Amino acids and derivatives	氨基酸及其衍生物	C23H42N6O8S	2	0.7397	-	2309.39	2369.42	1608.27	22779.8	28057	29145.7	1.34607	0.00573913	0.025678	12.7217	3.66922	up
MW0145703	Asn-Asp-Leu-Asp	Asn-Asp-Leu-Asp	Amino acids and derivatives	氨基酸及其衍生物	Amino acids and derivatives	氨基酸及其衍生物	C18H29N5O10	2	0.7396	-	407527	366262	348970	102148	108786	101157	1.35069	0.00357308	0.018568	0.277968	-1.84701	down
MW0144808	Ala-Val-Thr-Asp-Asp	Ala-Val-Thr-Asp-Asp	Amino acids and derivatives	氨基酸及其衍生物	Amino acids and derivatives	氨基酸及其衍生物	C20H33N5O11	2	0.7382	-	26676.5	33886.9	36350.4	149689	286692	258402	1.32094	0.0406283	0.104728	7.16908	2.84179	up
MW0154274	Nap-HoPhe-OH	Nap-HoPhe-OH	Amino acids and derivatives	氨基酸及其衍生物	Amino acids and derivatives	氨基酸及其衍生物	C28H24N2O6	2	0.7372	-	152196	164347	135259	39430.4	50011.7	56046.3	1.32679	0.00139609	0.0106776	0.322018	-1.63479	down
MW0149822	Gln-Thr-Phe-Asp	谷酰氨-苏氨酸-苯丙氨酸-天门冬氨酸	Amino acids and derivatives	氨基酸及其衍生物	Amino acids and derivatives	氨基酸及其衍生物	C22H31N5O9	2	0.737	-	509.12	512.53	204.25	1199.59	1955.12	1342.42	1.21218	0.0274634	0.0788603	3.66843	1.87516	up
MW0157759	Thr-Phe-Glu-Glu-Asp	Thr-Phe-Glu-Glu-Asp	Amino acids and derivatives	氨基酸及其衍生物	Amino acids and derivatives	氨基酸及其衍生物	C27H37N5O13	2	0.7366	-	3783.93	8110.59	8466.64	31513.8	37254.9	39984.9	1.29351	0.00138448	0.0106202	5.34123	2.41717	up
MW0145407	Arg-Leu-Arg-Glu-Lys	Arg-Leu-Arg-Glu-Lys	Amino acids and derivatives	氨基酸及其衍生物	Amino acids and derivatives	氨基酸及其衍生物	C29H56N12O8	2	0.7337	-	50565.2	38853.5	27800.2	17278.9	10783	7571.05	1.21976	0.0378154	0.0994489	0.303986	-1.71792	down
MW0158570	Tyr-Phe-His-Glu	酪氨酸-苯丙氨酸-组氨酸-谷氨酸	Amino acids and derivatives	氨基酸及其衍生物	Amino acids and derivatives	氨基酸及其衍生物	C29H34N6O8	2	0.7324	-	1291.52	1917.79	601.38	56595.8	58967.2	58471.9	1.335	5.94977e-06	0.000949365	45.6702	5.51318	up
MW0150490	Gly-Thr-Gly-Glu-Ser	甘氨酸-苏氨酸-甘氨酸-谷氨酸-丝氨酸	Amino acids and derivatives	氨基酸及其衍生物	Amino acids and derivatives	氨基酸及其衍生物	C16H27N5O10	2	0.7318	-	9310.1	8553.7	10937.6	21399.2	25275.9	33360	1.30016	0.0356879	0.0951239	2.77887	1.4745	up
MW0153153	Lys-Thr-Ile-Thr-Leu	Lys-Thr-Ile-Thr-Leu	Amino acids and derivatives	氨基酸及其衍生物	Amino acids and derivatives	氨基酸及其衍生物	C26H50N6O8	2	0.7305	-	2692.37	5873.89	2388.75	563.42	633.42	2285.25	1.04314	0.14131	0.258121	0.317854	-1.65357	down
MW0155797	Pro-Asn-His	Pro-Asn-His	Amino acids and derivatives	氨基酸及其衍生物	Amino acids and derivatives	氨基酸及其衍生物	C15H22N6O5	2	0.7282	-	352036	356668	372345	2.27182e+06	2.31507e+06	2.3903e+06	1.35457	0.00020975	0.00374611	6.45409	2.69021	up
MW0156897	Ser-Pro-Pro-Ser-Ala	Ser-Pro-Pro-Ser-Ala	Amino acids and derivatives	氨基酸及其衍生物	Amino acids and derivatives	氨基酸及其衍生物	C19H31N5O8	2	0.7277	-	9464.8	6362.44	9458.69	38182.2	41841.6	34032.2	1.33081	0.00173877	0.011987	4.51065	2.17333	up
MW0152206	Leu-Ala-Pro-Leu-Glu	Leu-Ala-Pro-Leu-Glu	Amino acids and derivatives	氨基酸及其衍生物	Amino acids and derivatives	氨基酸及其衍生物	C25H43N5O8	2	0.7276	-	92.02	284.4	130.83	1531.66	217.11	1522.58	1.01839	0.167183	0.292559	6.44919	2.68912	up
MW0149677	Gln-Glu-Asp-Glu-Arg	谷酰氨-谷氨酸-天门冬氨酸-谷氨酸-精氨酸	Amino acids and derivatives	氨基酸及其衍生物	Amino acids and derivatives	氨基酸及其衍生物	C25H41N9O13	2	0.725	-	6783.56	7166.46	5773.71	19791.7	21430.4	17915.3	1.33978	0.00221089	0.0137095	2.99829	1.58414	up
MW0152865	Lys-Arg-Gly-Leu-Arg	Lys-Arg-Gly-Leu-Arg	Amino acids and derivatives	氨基酸及其衍生物	Amino acids and derivatives	氨基酸及其衍生物	C26H52N12O6	2	0.724	-	65722.8	59187.5	49631.3	25172.4	12740.5	14905.7	1.27533	0.00292763	0.0164074	0.302614	-1.72445	down
MW0156821	Ser-Leu-Leu-Ser-Phe	Ser-Leu-Leu-Ser-Phe	Amino acids and derivatives	氨基酸及其衍生物	Amino acids and derivatives	氨基酸及其衍生物	C27H43N5O8	2	0.7232	-	5448.91	1867.09	3081.39	13897.6	13915.8	15170.9	1.25292	0.0040898	0.0204521	4.13414	2.04759	up
MW0151465	Ile-Ile-Arg-Ser-Ser	Ile-Ile-Arg-Ser-Ser	Amino acids and derivatives	氨基酸及其衍生物	Amino acids and derivatives	氨基酸及其衍生物	C24H46N8O8	2	0.7219	-	39884.2	41686.3	35647.4	20842.5	13596.5	17277.5	1.29147	0.00150914	0.0110835	0.441199	-1.1805	down
MW0150512	Gly-Tyr-Asn-Ser-Tyr	甘氨酸-酪氨酸-天门冬酰氨-丝氨酸-酪氨酸	Amino acids and derivatives	氨基酸及其衍生物	Amino acids and derivatives	氨基酸及其衍生物	C27H34N6O10	2	0.7188	-	12081.9	4373.65	4488.99	52526.9	45112.3	40127.1	1.28097	0.0014484	0.0109108	6.57766	2.71757	up
MW0144468	Ala-Arg-Asp-Glu-Thr	Ala-Arg-Asp-Glu-Thr	Amino acids and derivatives	氨基酸及其衍生物	Amino acids and derivatives	氨基酸及其衍生物	C22H38N8O11	2	0.7153	-	2875.71	3034.82	1147.24	7248.13	5718.62	6129.73	1.16155	0.00744076	0.031208	2.70574	1.43602	up
MW0158699	TyrMe-Asn-OH	TyrMe-Asn-OH	Amino acids and derivatives	氨基酸及其衍生物	Amino acids and derivatives	氨基酸及其衍生物	C20H21N3O8	2	0.7118	-	781.73	1439.62	1874.23	3746.99	1946.16	2757.17	1.03096	0.0895754	0.184749	2.06328	1.04494	up
MW0150151	Glu-Ser-Tyr-Asp	谷氨酸-丝氨酸-酪氨酸-天门冬氨酸	Amino acids and derivatives	氨基酸及其衍生物	Amino acids and derivatives	氨基酸及其衍生物	C21H28N4O11	2	0.7104	-	143578	139821	132349	54687	36788.7	52345.1	1.31846	0.000538115	0.00620937	0.345932	-1.53144	down
MW0158717	TyrMe-Tyr-OH	TyrMe-Tyr-OH	Amino acids and derivatives	氨基酸及其衍生物	Amino acids and derivatives	氨基酸及其衍生物	C25H24N2O8	2	0.7102	-	204768	207562	200832	751995	694356	801880	1.352	0.0031345	0.0172106	3.66661	1.87445	up
MW0158995	Val-Glu-Phe-Asp	Val-Glu-Phe-Asp	Amino acids and derivatives	氨基酸及其衍生物	Amino acids and derivatives	氨基酸及其衍生物	C23H32N4O9	2	0.7084	-	196816	178557	190068	34192.2	40824.2	36094.1	1.35133	0.00035663	0.00492241	0.196502	-2.34738	down
MW0145307	Arg-Asp-Val-Glu	Arg-Asp-Val-Glu	Amino acids and derivatives	氨基酸及其衍生物	Amino acids and derivatives	氨基酸及其衍生物	C20H35N7O9	2	0.7027	-	51955.3	47112.5	44076	118530	123735	137926	1.34276	0.00203872	0.0130389	2.65601	1.40926	up
MW0157810	Thr-Thr-Asp-Glu-Tyr	Thr-Thr-Asp-Glu-Tyr	Amino acids and derivatives	氨基酸及其衍生物	Amino acids and derivatives	氨基酸及其衍生物	C26H37N5O13	2	0.7027	-	14106.1	12833.1	14721	2199.34	995.96	1447.24	1.32693	0.000156095	0.00320118	0.111438	-3.16569	down
MW0151041	His-Phe-Gln-Asp	组氨酸-苯丙氨酸-古酰氨-天门冬氨酸	Amino acids and derivatives	氨基酸及其衍生物	Amino acids and derivatives	氨基酸及其衍生物	C24H31N7O8	2	0.7018	-	19372.2	19859.6	18881.6	7842.02	9600.3	6590.85	1.31587	0.0030497	0.0169454	0.413556	-1.27384	down
MW0144212	Abu-Ser-OH	Abu-Ser-OH	Amino acids and derivatives	氨基酸及其衍生物	Amino acids and derivatives	氨基酸及其衍生物	C12H14N2O7	3	0.9937	-	24350.1	7506.49	38519.4	900.86	1016.83	3001.56	1.22478	0.134544	0.249052	0.0698995	-3.83857	down
MW0159005	Val-Glu-Val-Ala-Glu	Val-Glu-Val-Ala-Glu	Amino acids and derivatives	氨基酸及其衍生物	Amino acids and derivatives	氨基酸及其衍生物	C23H39N5O10	3	0.9861	-	1008.93	1550.91	2487.93	873.19	321.22	768.36	1.03412	0.127078	0.238422	0.388839	-1.36276	down
MW0146251	Asp-Ser-Asn-Lys	Asp-Ser-Asn-Lys	Amino acids and derivatives	氨基酸及其衍生物	Amino acids and derivatives	氨基酸及其衍生物	C17H30N6O9	3	0.9699	-	50952.6	36738.5	22023.9	15267.8	15376.8	12137.9	1.1749	0.113946	0.219875	0.389942	-1.35867	down
MW0155851	Pro-Glu-Glu-Leu-Lys	Pro-Glu-Glu-Leu-Lys	Amino acids and derivatives	氨基酸及其衍生物	Amino acids and derivatives	氨基酸及其衍生物	C27H46N6O10	3	0.8773	-	59377.9	62754.9	59548.8	17305.1	23444.1	11835	1.29376	0.00310632	0.0171428	0.289431	-1.78871	down
MW0156476	S1P Lyase Fluorogenic Substrate	S1P Lyase Fluorogenic Substrate	Benzene and substituted derivatives	苯及其衍生物	Benzene and substituted derivatives	苯及其衍生物	C14H18NO8P	3	0.7498	-	17480.1	15654.8	8159.11	2125.49	4805.57	3402.94	1.22	0.0598785	0.137454	0.250254	-1.99854	down
MW0151570	Ile-Ser-Asn-Asp	Ile-Ser-Asn-Asp	Amino acids and derivatives	氨基酸及其衍生物	Amino acids and derivatives	氨基酸及其衍生物	C17H29N5O9	3	0.7243	-	10197.2	10518.3	4699.76	62859	74204.6	73671.6	1.31521	0.000685741	0.00725016	8.29169	3.05167	up
MW0151553	Ile-Phe-Val-Lys	Ile-Phe-Val-Lys	Amino acids and derivatives	氨基酸及其衍生物	Amino acids and derivatives	氨基酸及其衍生物	C26H43N5O5	3	0.7221	-	17546.5	26280.1	17024.6	5063.06	7999.4	8918.02	1.24257	0.0361941	0.0960792	0.361217	-1.46906	down
MW0153048	Lys-Leu-Thr-Arg	Lys-Leu-Thr-Arg	Amino acids and derivatives	氨基酸及其衍生物	Amino acids and derivatives	氨基酸及其衍生物	C22H44N8O6	3	0.7209	-	24006	21020.7	20779	6241.48	11042.7	3604.56	1.2003	0.00964159	0.0377363	0.31743	-1.65549	down
MW0144653	Ala-Lys-Ala-Thr-Glu	Ala-Lys-Ala-Thr-Glu	Amino acids and derivatives	氨基酸及其衍生物	Amino acids and derivatives	氨基酸及其衍生物	C21H38N6O9	3	0.7028	-	1480.69	3260.88	1891.74	11989.4	17855.1	20702.3	1.3063	0.0252542	0.0743222	7.62014	2.92982	up
MW0156710	Ser-Gln-Ile-Asp	Ser-Gln-Ile-Asp	Amino acids and derivatives	氨基酸及其衍生物	Amino acids and derivatives	氨基酸及其衍生物	C18H31N5O9	3	0.6993	-	6013.07	3710.3	5484.01	46407.7	54459.9	49766.7	1.34284	0.00132629	0.010326	9.90534	3.30821	up
MW0158456	Tyr-Glu-Gln-Asp	酪氨酸-谷氨酸-谷氨酸-天冬氨酸	Amino acids and derivatives	氨基酸及其衍生物	Amino acids and derivatives	氨基酸及其衍生物	C23H31N5O11	3	0.6972	-	858	1333.19	888.57	9828.2	8740.39	9347.68	1.34358	0.000207565	0.00372531	9.06443	3.18022	up
MW0149690	Gln-Glu-Tyr-Asp	谷酰氨-谷氨酸-酪氨酸-天门冬氨酸	Amino acids and derivatives	氨基酸及其衍生物	Amino acids and derivatives	氨基酸及其衍生物	C23H31N5O11	3	0.6945	-	28916.2	25780	24590.1	5061.81	237.31	662.11	1.19356	0.000313114	0.00457428	0.0751861	-3.73339	down
MW0146252	Asp-Ser-Asp-Leu-Tyr	Asp-Ser-Asp-Leu-Tyr	Amino acids and derivatives	氨基酸及其衍生物	Amino acids and derivatives	氨基酸及其衍生物	C26H37N5O12	3	0.6909	-	22826.2	12738.6	27446.4	135810	146470	145443	1.3184	3.91306e-05	0.00171804	6.78805	2.763	up
MW0151643	Ile-Val-Glu-Asp	Ile-Val-Glu-Asp	Amino acids and derivatives	氨基酸及其衍生物	Amino acids and derivatives	氨基酸及其衍生物	C20H34N4O9	3	0.6778	-	41033.7	35469.4	23149.8	18656.8	11384.9	9930.69	1.18403	0.0444687	0.111271	0.401116	-1.31791	down
MW0150013	Glu-Gly-Leu-Arg-Gln	谷氨酸-甘氨酸-亮氨酸-精氨酸-谷酰胺	Amino acids and derivatives	氨基酸及其衍生物	Amino acids and derivatives	氨基酸及其衍生物	C24H43N9O9	3	0.6775	-	102.34	423.6	997.48	3063.28	1358.67	3484.67	1.08463	0.0662652	0.148448	5.19005	2.37575	up
MW0149412	GalNAc1-4[Fuc1-3]GlcNAcSp	GalNAc1-4[Fuc1-3]GlcNAcSp	Others	其它类	Saccharides	糖类	C24H41N5O15	3	0.6748	-	23632.7	14858.7	22282.9	100697	52430.8	83091.1	1.27404	0.0489664	0.119136	3.88683	1.95859	up
MW0157866	Thr-Val-Lys-Glu	Thr-Val-Lys-Glu	Amino acids and derivatives	氨基酸及其衍生物	Amino acids and derivatives	氨基酸及其衍生物	C20H37N5O8	3	0.6714	-	35587.9	33373.7	31415.7	14896	15013.1	7406.82	1.23257	0.00562824	0.0253298	0.371756	-1.42757	down
MW0145419	Arg-Leu-Leu-Asn-Leu	Arg-Leu-Leu-Asn-Leu	Amino acids and derivatives	氨基酸及其衍生物	Amino acids and derivatives	氨基酸及其衍生物	C28H53N9O7	3	0.663	-	15339.6	16371	13283	6267.32	5999.84	7135.15	1.33065	0.00560437	0.0252488	0.431223	-1.21349	down
MW0146254	Asp-Ser-Gln-Lys	Asp-Ser-Gln-Lys	Amino acids and derivatives	氨基酸及其衍生物	Amino acids and derivatives	氨基酸及其衍生物	C18H32N6O9	3	0.6586	-	3864.34	6153.47	3270.43	25730.5	7482.17	9688.06	1.06049	0.226242	0.361375	3.22847	1.69085	up
MW0158698	TyrMe-Ala-OH	TyrMe-Ala-OH	Amino acids and derivatives	氨基酸及其衍生物	Amino acids and derivatives	氨基酸及其衍生物	C19H20N2O7	3	0.6585	-	295143	349379	237437	55352.7	65250.1	57435.1	1.33915	0.0177533	0.0576493	0.201866	-2.30853	down
MW0146054	Asp-Asp-His	Asp-Asp-His	Amino acids and derivatives	氨基酸及其衍生物	Amino acids and derivatives	氨基酸及其衍生物	C14H19N5O8	3	0.6567	-	44273.4	45419.6	67936.1	13100.3	9866.6	13682.9	1.3181	0.0320791	0.0883671	0.232507	-2.10466	down
MW0146226	Asp-Phe-Ser-Ala-Thr	Asp-Phe-Ser-Ala-Thr	Amino acids and derivatives	氨基酸及其衍生物	Amino acids and derivatives	氨基酸及其衍生物	C23H33N5O10	3	0.6559	-	3536.69	1294.14	5715.59	13330.4	7803.92	9070.17	1.0684	0.0390783	0.102109	2.86396	1.51801	up
MW0150950	His-Gly-Val-Asp-Lys	组氨酸-甘氨酸-缬氨酸-天门冬氨酸-赖氨酸	Amino acids and derivatives	氨基酸及其衍生物	Amino acids and derivatives	氨基酸及其衍生物	C23H38N8O8	3	0.6528	-	3172.55	2768.66	3583.86	1409.03	1019.17	1992.96	1.20276	0.0106553	0.0402734	0.46416	-1.1073	down
MW0144209	Abu-Nap-OH	Abu-Nap-OH	Amino acids and derivatives	氨基酸及其衍生物	Amino acids and derivatives	氨基酸及其衍生物	C22H20N2O6	3	0.6479	-	743.42	120.78	284.73	1062.01	1029.81	1216.22	1.057	0.050542	0.121559	2.87924	1.52569	up
MW0155134	Phe-Asp-Phe-Gln-Asn	Phe-Asp-Phe-Gln-Asn	Amino acids and derivatives	氨基酸及其衍生物	Amino acids and derivatives	氨基酸及其衍生物	C31H39N7O10	3	0.6449	-	3902.19	5797.26	5292.12	9115.35	13160.9	62663.5	1.02033	0.308277	0.448062	5.66583	2.50229	up
MW0145551	Arg-Tyr-Thr-Glu	Arg-Tyr-Thr-Glu	Amino acids and derivatives	氨基酸及其衍生物	Amino acids and derivatives	氨基酸及其衍生物	C24H37N7O9	3	0.6433	-	878.61	3323.15	2724.34	34109.2	38170.8	53054.8	1.30241	0.0192695	0.0610119	18.096	4.1776	up
MW0150052	Glu-Leu-Gly-Lys-Gln	谷氨酸-亮氨酸-甘氨酸-赖氨酸-谷酰胺	Amino acids and derivatives	氨基酸及其衍生物	Amino acids and derivatives	氨基酸及其衍生物	C24H43N7O9	3	0.6422	-	24182.7	20508.8	24636.8	72531	139466	41600.1	1.16163	0.167044	0.292552	3.65792	1.87102	up
MW0153538	Met-Gln-Pro-Arg-Val	Met-Gln-Pro-Arg-Val	Amino acids and derivatives	氨基酸及其衍生物	Amino acids and derivatives	氨基酸及其衍生物	C26H47N9O7S	3	0.6413	-	15961	12051.2	13524	2030.87	1311.28	2446.56	1.32822	0.00567758	0.0254551	0.139365	-2.84306	down
MW0151482	Ile-Leu-Ala-Asp	Ile-Leu-Ala-Asp	Amino acids and derivatives	氨基酸及其衍生物	Amino acids and derivatives	氨基酸及其衍生物	C19H34N4O7	3	0.6405	-	13745.8	15967.7	16785.7	3808.91	2827.97	4463.99	1.32793	0.00136597	0.0105465	0.238732	-2.06653	down
MW0152400	Leu-Leu-Leu-Pro-Gly	Leu-Leu-Leu-Pro-Gly	Amino acids and derivatives	氨基酸及其衍生物	Amino acids and derivatives	氨基酸及其衍生物	C25H45N5O6	3	0.64	-	4250.36	1228.4	3914.56	17078.3	16213.1	19743.5	1.24226	0.000554922	0.00632904	5.64603	2.49724	up
MW0105471	Ala-Leu-Asp-Asp	Ala-Leu-Asp-Asp	Amino acids and derivatives	氨基酸及其衍生物	Amino acids and derivatives	氨基酸及其衍生物	C17H28N4O9	3	0.6396	-	3842.51	7115.12	3481.98	13689.8	23079.6	15032.9	1.24836	0.0372333	0.0981961	3.58751	1.84298	up
MW0155817	Pro-Asp-Thr-Gly-Ile	Pro-Asp-Thr-Gly-Ile	Amino acids and derivatives	氨基酸及其衍生物	Amino acids and derivatives	氨基酸及其衍生物	C21H35N5O9	3	0.6388	-	33312.4	39111.4	30837.8	6368.53	9615.9	5916.56	1.3253	0.00260995	0.0152858	0.212092	-2.23724	down
MW0149376	Gal(1-3)[Fuc(1-2)]Gal(1-4)GlcSp	Gal(1-3)[Fuc(1-2)]Gal(1-4)GlcSp	Others	其它类	Saccharides	糖类	C26H45N3O20	3	0.6362	-	5823.79	2058.52	6019.14	26124.9	13563.1	35148.8	1.19923	0.0776865	0.166515	5.38338	2.42851	up
MW0155188	Phe-Glu-Ser-Phe-Gly	Phe-Glu-Ser-Phe-Gly	Amino acids and derivatives	氨基酸及其衍生物	Amino acids and derivatives	氨基酸及其衍生物	C28H35N5O9	3	0.6328	-	142320	96262.3	97098	20001.1	36604.8	7355.31	1.19787	0.0124095	0.0447692	0.190542	-2.39182	down
MW0144245	Acetoxy-6-gingerol	Acetoxy-6-gingerol	Benzene and substituted derivatives	苯及其衍生物	Benzene and substituted derivatives	苯及其衍生物	C19H28O5	3	0.6315	-	6858.76	1384.23	4125.52	24132.9	28368.9	26191	1.22843	0.000524569	0.00616676	6.36235	2.66956	up
MEDP1245	3-Hydroxycaprolactone	3-羟基己内酯	Others	其它类	Lactones	内酯类化合物	C12H16N2O4	3	0.6303	-	27531	30025.2	43052.8	85337.4	138815	186233	1.2642	0.067593	0.150694	4.07901	2.02822	up
MW0144582	Ala-Gly-Leu-Val-Ser	Ala-Gly-Leu-Val-Ser	Amino acids and derivatives	氨基酸及其衍生物	Amino acids and derivatives	氨基酸及其衍生物	C19H35N5O7	3	0.6292	-	17611.2	18289.5	15139.4	49202.6	56124.2	54624.7	1.34483	0.0008226	0.00791083	3.13384	1.64793	up
MW0149402	Galb1-3[Neu5Aca2,6]GalNAca-Thr	Galb1-3[Neu5Aca2,6]GalNAca-Thr	Others	其它类	Saccharides	糖类	C32H53N3O22	3	0.6285	-	1271.91	685.24	3207.67	5337.74	5021.58	4511.67	1.10035	0.0410037	0.105555	2.87929	1.52571	up
MW0151168	His-Nap-OH	His-Nap-OH	Amino acids and derivatives	氨基酸及其衍生物	Amino acids and derivatives	氨基酸及其衍生物	C25H22N4O6	3	0.6279	-	309504	299386	309234	93158.6	81741.6	85698.2	1.35231	1.28747e-06	0.000557991	0.283838	-1.81686	down
MW0148400	Diacetyl-8-gingerdiol	Diacetyl-8-gingerdiol	Heterocyclic compounds	杂环化合物	Heterocyclic compounds	杂环化合物	C23H36O6	3	0.6275	-	56067.7	43883.3	43529.6	3967.16	30058.6	6011.86	1.08542	0.0361499	0.0960402	0.279046	-1.84143	down
MW0156931	Ser-Thr-Pro-Asp-Ala	Ser-Thr-Pro-Asp-Ala	Amino acids and derivatives	氨基酸及其衍生物	Amino acids and derivatives	氨基酸及其衍生物	C19H31N5O10	3	0.6251	-	16687.8	7861.05	9512.79	5755.94	4218.21	3266.39	1.15849	0.116159	0.222955	0.388723	-1.36319	down
MW0150327	Gly-Asp-Ile-Val-Ile	甘氨酸-天门冬氨酸-异亮氨酸	Amino acids and derivatives	氨基酸及其衍生物	Amino acids and derivatives	氨基酸及其衍生物	C23H41N5O8	3	0.6214	-	64240.3	47291.7	63670.8	136636	176488	156714	1.31379	0.00524071	0.0241459	2.68168	1.42314	up
MW0149894	Glu-Ala-Asn-Lys-Glu	谷氨酸-丙氨酸-天门冬酰氨-赖氨酸-谷氨酸	Amino acids and derivatives	氨基酸及其衍生物	Amino acids and derivatives	氨基酸及其衍生物	C23H39N7O11	3	0.6181	-	55896.5	48194.6	45872.2	197979	211555	225443	1.34851	0.000773484	0.00762407	4.23422	2.0821	up
MW0149861	Gln-Val-Ile-Asp	谷酰氨-缬氨酸-异亮氨酸-天门冬氨酸	Amino acids and derivatives	氨基酸及其衍生物	Amino acids and derivatives	氨基酸及其衍生物	C20H35N5O8	3	0.612	-	8994.96	9140.12	1843.75	16186.3	19316.6	17751	1.01238	0.0316547	0.0874575	2.66552	1.41442	up
MW0151217	HoPhe-Lys-OH	HoPhe-Lys-OH	Others	其它类	Lactones	内酯类化合物	C21H25N3O6	3	0.6106	-	12191.5	9302.4	7472.06	660.42	4171.18	429.7	1.13623	0.0129271	0.0459483	0.181638	-2.46087	down
MW0158690	Tyr-HoPhe-OH	Tyr-HoPhe-OH	Amino acids and derivatives	氨基酸及其衍生物	Amino acids and derivatives	氨基酸及其衍生物	C25H24N2O7	3	0.6054	-	596736	518929	558510	270474	208871	218088	1.32794	0.000438291	0.00552196	0.416583	-1.26332	down
MW0149996	Glu-Glu-Met-Ile-Ala	谷氨酸-谷氨酸-蛋氨酸-异亮氨酸-丙氨酸	Amino acids and derivatives	氨基酸及其衍生物	Amino acids and derivatives	氨基酸及其衍生物	C24H41N5O10S	3	0.602	-	1458.29	454.14	913.4	36430.7	40051.1	41844.3	1.33387	0.00126497	0.0100784	41.8731	5.38795	up
MW0156800	Ser-Ile-Lys-Gly-Lys	Ser-Ile-Lys-Gly-Lys	Amino acids and derivatives	氨基酸及其衍生物	Amino acids and derivatives	氨基酸及其衍生物	C23H45N7O7	3	0.601	-	389278	375841	394958	766084	909502	868181	1.3426	0.00759529	0.0317002	2.19276	1.13275	up
MW0156730	Ser-Glu-Glu-Glu-Ile	Ser-Glu-Glu-Glu-Ile	Amino acids and derivatives	氨基酸及其衍生物	Amino acids and derivatives	氨基酸及其衍生物	C24H39N5O13	3	0.593	-	73432.3	12673.8	70638.5	182846	188306	202881	1.08567	0.0136924	0.0478823	3.66222	1.87272	up
MW0153125	Lys-Ser-Asp-Glu-Met	Lys-Ser-Asp-Glu-Met	Amino acids and derivatives	氨基酸及其衍生物	Amino acids and derivatives	氨基酸及其衍生物	C23H40N6O11S	3	0.5917	-	510.75	1125.53	1335.75	16443.8	17507	16665.3	1.32793	5.07225e-06	0.000949365	17.0308	4.09007	up
MW0151500	Ile-Leu-Tyr-Asp	Ile-Leu-Tyr-Asp	Amino acids and derivatives	氨基酸及其衍生物	Amino acids and derivatives	氨基酸及其衍生物	C25H38N4O8	3	0.5914	-	28340.6	26742.7	23621.6	93743.6	169190	100145	1.31145	0.0587645	0.135744	4.61317	2.20576	up
MW0154272	Nap-Gly-OH	Nap-Gly-OH	Amino acids and derivatives	氨基酸及其衍生物	Amino acids and derivatives	氨基酸及其衍生物	C20H16N2O6	3	0.5867	-	13869.8	10066.1	7878.99	3128.29	2695.27	2757.89	1.31012	0.0467123	0.115291	0.269731	-1.89041	down
MW0153170	Lys-Tyr-Arg-Arg	Lys-Tyr-Arg-Arg	Amino acids and derivatives	氨基酸及其衍生物	Amino acids and derivatives	氨基酸及其衍生物	C27H47N11O6	3	0.5865	-	8830.28	16423	9607.12	8333.96	2883.02	5280.35	1.00184	0.111942	0.21756	0.473239	-1.07936	down
MW0143824	6-Desmethoxy hormothamnione triacetate	6-Desmethoxy hormothamnione triacetate	Others	其它类	Lactones	内酯类化合物	C27H26O11	3	0.5851	-	46747.2	30608.6	78998.1	223657	195717	237478	1.27001	0.000978899	0.00884623	4.20106	2.07075	up
MW0156954	Ser-Tyr-Glu-Asp	Ser-Tyr-Glu-Asp	Amino acids and derivatives	氨基酸及其衍生物	Amino acids and derivatives	氨基酸及其衍生物	C21H28N4O11	3	0.5753	-	102545	113273	114580	235174	250173	257195	1.34713	0.000226997	0.0038874	2.24742	1.16827	up
MW0152347	Leu-Gly-Phe-Glu-Val	Leu-Gly-Phe-Glu-Val	Amino acids and derivatives	氨基酸及其衍生物	Amino acids and derivatives	氨基酸及其衍生物	C27H41N5O8	3	0.5736	-	22729.2	21069	18228.5	534.94	2213.26	6163.81	1.16056	0.00142312	0.0108081	0.14368	-2.79906	down
MW0150845	His-Asn-Ala-Glu	组氨酸-天门冬酰氨-丙氨酸-谷氨酸	Amino acids and derivatives	氨基酸及其衍生物	Amino acids and derivatives	氨基酸及其衍生物	C18H27N7O8	3	0.5624	-	2014.94	2302.07	2587.59	11496.5	29469.6	14977	1.30253	0.096988	0.195449	8.10231	3.01833	up
MW0155972	Pro-Pro-Asp	Pro-Pro-Asp	Amino acids and derivatives	氨基酸及其衍生物	Amino acids and derivatives	氨基酸及其衍生物	C14H21N3O6	3	0.5519	-	9740.47	9763.71	9419.35	121377	121721	133673	1.35448	0.00120444	0.00982093	13.0265	3.70337	up
MW0144571	Ala-Glu-Ser-Glu	Ala-Glu-Ser-Glu	Amino acids and derivatives	氨基酸及其衍生物	Amino acids and derivatives	氨基酸及其衍生物	C16H26N4O10	3	0.5513	-	7117.74	33558.3	40929.6	256977	206058	248797	1.22955	0.000810413	0.00785171	8.72282	3.12479	up
MW0193286	Acacetin-7-O-glucuronide	金合欢素-7-O-葡萄糖醛酸苷	Flavonoids	黄酮	Flavones	黄酮	C26H20O8	3	0.5462	-	5950.88	3915.63	800.67	27133	21775.6	19889.1	1.17418	0.00285936	0.0162251	6.44948	2.68918	up
MEDP1418	Carnitine C11:1	肉碱 C11:1	FA	脂肪酰类	CAR	酰基肉碱	C18H33NO4	3	0.519	-	46602.6	42891.7	39585.5	5107.33	8616.71	9557.17	1.32086	0.000307521	0.00456793	0.180363	-2.47102	down
MW0112809	3'-Fucosyllactose	3'-岩藻糖半乳糖	Others	其它类	Saccharides	糖类	C18H32O15	2	0.8949	41312-47-4	965422	1.06848e+06	894014	151865	166130	207119	1.34489	0.00188552	0.0125425	0.179347	-2.47917	down
MW0114515	Gentianose	龙胆糖	Others	其它类	Saccharides	糖类	C18H32O16	2	0.8947	25954-44-3	121556	85788.9	105182	1298.6	3585.14	3136.04	1.33383	0.00995556	0.0385285	0.0256611	-5.28428	down
MW0107553	Isobutyrylglycine	异丁酰甘氨酸	Amino acids and derivatives	氨基酸及其衍生物	Amino acids and derivatives	氨基酸及其衍生物	C6H11NO3	2	0.8714	15926-18-8	754282	723020	847324	293905	301859	302388	1.34795	0.005894	0.0262011	0.386364	-1.37197	down
MW0052373	Dihydrojasmonic acid	二氢茉莉酮酸	Organic acids	有机酸	Organic acids	有机酸	C12H20O3	2	0.7776	98674-52-3	9892.12	4989.92	4912.56	56247.3	51658.4	58999.6	1.3247	8.54108e-05	0.00236279	8.43186	3.07585	up
MW0113991	beta-D-Glucosamine	D-葡糖胺	Alcohol and amines	醇、胺类	Amines	胺类	C6H13NO5	2	0.777	14257-69-3	3020.28	3471.84	2938.24	11395.2	8525.14	8477.23	1.32817	0.0200092	0.0626891	3.0113	1.59039	up
MW0136981	7,3'-Dihydroxyflavone	7，3-二羟基黄酮	Others	其它类	Ketone compounds	酮类化合物	C15H10O4	2	0.7737	108238-40-0	98475	107181	104041	40002.6	50152.8	56153.1	1.30776	0.00182113	0.0123068	0.472425	-1.08184	down
MW0127882	2,2'-Dihydroxy-4',6'-dimethoxychalcone	（2E)-1-(2-羟基-4,6-二甲氧基苯基)-3-(2-羟基苯基）丙基-2-烯-1-酮	Others	其它类	Ketone compounds	酮类化合物	C17H16O5	2	0.7695	1776-28-9	6632.42	5366.98	4087.24	1444.32	163.49	802.72	1.16161	0.0120837	0.044009	0.149847	-2.73844	down
MW0133044	3,2'-Dihydroxyflavone	3，2-二羟基黄酮	Flavonoids	黄酮	Flavones	黄酮	C15H10O4	2	0.7628	6068-76-4	194800	127361	185264	45037.9	52631.9	54113.5	1.31638	0.0283631	0.0809433	0.299124	-1.74118	down
MW0121650	5-Methyltetrahydrofolic acid	5-甲基四氢叶酸	Organic acids	有机酸	Organic acids	有机酸	C20H25N7O6	2	0.7623	134-35-0 | 31690-09-2	2500.64	5427.07	5868.01	53722.5	79261	64416.2	1.32442	0.0129726	0.0460093	14.3088	3.83883	up
MW0110113	Tryptophylglycine	色氨酸-甘氨酸	Amino acids and derivatives	氨基酸及其衍生物	Amino acids and derivatives	氨基酸及其衍生物	C13H15N3O3	2	0.7577	7360-09-0	152.13	153.26	200.13	13053.1	13789.7	13770.2	1.35379	0.000311496	0.00457428	80.339	6.32803	up
MEDP0434	1-Heptadecanoyl-sn-glycero-3-phosphocholine	溶血磷脂酰胆碱 17:0	Lipids	脂质	LPC	溶血磷脂酰胆碱	C25H52NO7P	2	0.7575	50930-23-9	71.17	178.6	132.58	19.85	13.14	12.99	1.29951	0.0683884	0.151894	0.120256	-3.05582	down
MW0113887	alpha,beta-Trehalose	α，β-海藻糖	Others	其它类	Saccharides	糖类	C12H22O11	2	0.7521	585-91-1	89.74	884.7	748.25	4141.46	2833.79	2994.02	1.11003	0.00834584	0.0340378	5.78704	2.53282	up
MW0168272	Oxycanthine	氧刺棘碱	Lignans and Coumarins	木脂素和香豆素	Lignans	木脂素	C37H40N2O6	2	0.7473	548-40-3	4833.46	6823.38	4848.58	83247.1	92665.6	89299.3	1.35014	0.000629513	0.00684359	16.0682	4.00613	up
MEDL01762	Sakuranetin	5,4'-二羟基-7-甲氧基黄酮 (樱花素)	Flavonoids	黄酮	Flavanones	二氢黄酮	C16H14O5	2	0.7471	2957-21-3	41401.7	46805.5	33745.4	116933	114696	119342	1.33342	0.000921491	0.0085094	2.87793	1.52503	up
MW0137409	Artemetin	蒿黄素	Flavonoids	黄酮	Flavones	黄酮	C20H20O8	2	0.7462	479-90-3	581950	599660	558263	205398	193865	332575	1.26475	0.012444	0.0448441	0.420627	-1.24939	down
MEDP1568	Xanthosine-5'-monophosphate	黄嘌呤-5'-单磷酸	Nucleotides and derivatives	核苷酸及其衍生物	Nucleotides and derivatives	核苷酸及其衍生物	C10H13N4O9P	2	0.7456	523-98-8	4128.52	3908.29	4088.28	1349.87	1425.44	890.52	1.31576	0.00112392	0.00949311	0.302334	-1.72578	down
MEDN1414	12S-HHT	12S-HHT	Lipids	脂质	Free fatty acids	游离脂肪酸	C17H28O3	2	0.7383	54397-84-1	7973.9	15234	8458.63	30347.4	38665.2	36172.6	1.27797	0.00198517	0.0128574	3.32165	1.7319	up
MEDL02244	Podofilox	苦鬼臼毒素	Lignans and Coumarins	木脂素和香豆素	Lignans	木脂素	C22H22O8	2	0.7367	477-47-4	2589.23	2805.56	3866.67	972.64	574.3	1032.55	1.28113	0.0200427	0.0627337	0.278519	-1.84415	down
MW0150227	Glu-Arg	谷氨酸-精氨酸	Amino acids and derivatives	氨基酸及其衍生物	Amino acids and derivatives	氨基酸及其衍生物	C11H21N5O5	2	0.7364	7219-59-2	4597.79	1740.74	4375.59	111600	103453	108989	1.33314	0.000111001	0.00269737	30.2444	4.91859	up
MW0053472	(1S,3Z,5R,7R)-3-[(3,4-dihydroxyphenyl)-hydroxy-methylene]-1-[(2S)-2-isopropenyl-5-methyl-hex-4-enyl]-6,6-dimethyl-5,7-bis(3-methylbut-2-enyl)bicyclo[3.3.1]nonane-2,4,9-trione	藤黄醇	Phenolic acids	酚酸类	Phenolic acids	酚酸类	C38H50O6	2	0.7303	78824-30-3	19854.8	19284	19024.4	42105.1	39888.6	44436.2	1.34982	0.00253408	0.0150376	2.17371	1.12016	up
MW0152083	Lactupicrin	山莴苣苦素	Terpenoids	萜类	Sesquiterpenoids	倍半萜	C23H22O7	2	0.7229	65725-11-3	9173.02	10465.5	9877.5	3910.1	4263.19	3791.42	1.34597	0.00153756	0.0111861	0.405364	-1.30271	down
MW0106961	Glu-His	谷氨酸-组氨酸	Amino acids and derivatives	氨基酸及其衍生物	Amino acids and derivatives	氨基酸及其衍生物	C11H16N4O5	2	0.7217	21435-29-0	1918.28	817.52	1559.07	6088.4	1833.12	3942.85	1.00514	0.169676	0.295489	2.76245	1.46595	up
MW0010818	(10E,12Z)-9-HODE	(10E,12Z)-9-HODE	Lipids	脂质	Free fatty acids	游离脂肪酸	C18H32O3	2	0.7143	98524-19-7	770894	771567	775483	1.73122e+06	1.93514e+06	1.83161e+06	1.35124	0.00305585	0.0169506	2.37192	1.24605	up
MW0061625	CID 431000	Physalin B	Steroids	甾体	Steroid	甾体	C28H30O9	2	0.7142	23133-56-4	9430.21	8675.9	10660	5344.21	3569.37	1925	1.17528	0.0113465	0.0420547	0.376783	-1.40819	down
FDATN00282	Neohesperidin dihydrochalcone	新橙皮苷二氢查耳酮	Flavonoids	黄酮	Chalcones	查耳酮	C28H36O15	2	0.7095	20702-77-6	171375	160914	194959	71073.8	82918.6	77961.5	1.33441	0.00570091	0.0255421	0.439933	-1.18464	down
MEDL02193	Methyl 4-hydroxycinnamate	对羟基肉桂酸甲酯	Others	其它类	Lactones	内酯类化合物	C10H10O3	2	0.7057	19367-38-5 | 3943-97-3	1.36723e+06	1.29732e+06	1.41564e+06	456222	489804	466246	1.35234	0.000697354	0.00730584	0.346129	-1.53062	down
MEDL01768	6-O-Acetylarbutin	6-O-乙酰熊果苷	Phenolic acids	酚酸类	Phenolic acids	酚酸类	C14H18O8	3	0.9896	10338-88-2	1110.66	1661.64	2657.42	4556.83	12510.2	3309.42	1.06987	0.223861	0.358837	3.75276	1.90795	up
MW0016105	Beta-Cortol	β-甲酚	Alcohol and amines	醇、胺类	Alcohols	醇类	C21H36O5	3	0.9831	667-65-2	13126.1	11719.9	12882.5	45471.6	47707.6	35974.2	1.33926	0.0126909	0.0453805	3.42323	1.77536	up
MEDP0208	Succinic acid	琥珀酸	Organic acids	有机酸	Organic acids	有机酸	C4H6O4	3	0.9731	110-15-6	664104	417676	664997	107414	118015	115087	1.33	0.0293091	0.0827709	0.19494	-2.3589	down
MEDL00575	L-Isoleucine	L-异亮氨酸	Amino acids and derivatives	氨基酸及其衍生物	Amino acids and derivatives	氨基酸及其衍生物	C6H13NO2	3	0.9657	73-32-5	273853	269223	268586	1.35083e+06	1.32294e+06	1.35207e+06	1.35485	4.96956e-05	0.00195379	4.96	2.31034	up
MEDL02331	3,4-Dimethoxycinnamic acid	3,4-二甲氧基肉桂酸	Phenolic acids	酚酸类	Phenolic acids	酚酸类	C11H12O4	3	0.9652	14737-89-4	58254.8	63665.3	56357.3	14788.5	8280	18714.4	1.28847	0.000452282	0.0056374	0.23437	-2.09314	down
MEDN0533	Xanthosine	黄苷	Nucleotides and derivatives	核苷酸及其衍生物	Nucleotides and derivatives	核苷酸及其衍生物	C10H12N4O6	3	0.9618	146-80-5	44761.8	43609.1	49126.3	200113	212194	217244	1.35275	0.000330312	0.0046905	4.57865	2.19492	up
MEDP0025	L-Tryptophan	L-色氨酸	Amino acids and derivatives	氨基酸及其衍生物	Amino acids and derivatives	氨基酸及其衍生物	C11H12N2O2	3	0.9563	73-22-3	332681	304670	310537	1.73701e+06	1.8634e+06	1.9186e+06	1.35355	0.0009735	0.00883899	5.82243	2.54162	up
MW0052351	Digitoxigenin 3-[glucosyl-(1->6)-glucosyl-(1->4)-2,6-dideoxyribohexoside]	地高辛配基3-[葡萄糖基-(1->6)-葡萄糖基-(1->4)-2，6-二脱氧核糖己苷]	Steroids	甾体	Steroid	甾体	C41H64O17	3	0.9526	220710-06-5	62842	68320.1	67315.8	21423.4	25744.8	32592.7	1.30864	0.00169327	0.0117654	0.401863	-1.31522	down
MEDN0469	Citraconic acid	柠康酸	Organic acids	有机酸	Organic acids	有机酸	C5H6O4	3	0.9469	498-23-7	70914.4	48489.3	47743.6	937757	991193	1.02598e+06	1.34923	0.000307481	0.00456793	17.6786	4.14393	up
MEDP0401	5'-Deoxy-5'-(Methylthio) Adenosine	5-脱氧-5-甲硫腺苷	Nucleotides and derivatives	核苷酸及其衍生物	Nucleotides and derivatives	核苷酸及其衍生物	C11H15N5O3S	3	0.9391	2457-80-9	35992.6	38512.4	39533.7	15444.9	12423.9	12603.9	1.34084	7.17543e-05	0.00220035	0.354903	-1.4945	down
MEDL02773	Indoleacetaldehyde	吲哚-3-乙醛	Alkaloids	生物碱	Plumerane	吲哚类生物碱	C10H9NO	3	0.9016	2591-98-2	22599.7	21955.4	23471.3	89475.9	98748	89560.9	1.35301	0.00161328	0.0114999	4.08348	2.0298	up
MW0150555	Glyceollin III	大豆素 III	Flavonoids	黄酮	Isoflavones	异黄酮	C20H18O5	3	0.8941	61080-23-7	6801.55	8695.72	7373.62	21525.8	23814.3	20645.7	1.33859	0.000632618	0.00685442	2.88514	1.52864	up
MEDL00375	Oglufanide	谷氨酰色氨酸	Amino acids and derivatives	氨基酸及其衍生物	Amino acids and derivatives	氨基酸及其衍生物	C16H19N3O5	3	0.8931	38101-59-6	5003.79	4858.38	3973.34	15530.7	15514	14897	1.34485	3.6617e-05	0.00167509	3.32056	1.73143	up
MEDN0060	N-Isovaleroylglycine	N-异戊酰氨基乙酸	Amino acids and derivatives	氨基酸及其衍生物	Amino acids and derivatives	氨基酸及其衍生物	C7H13NO3	3	0.8889	16284-60-9	78476.9	60734.8	61820.6	10893.9	28486.7	19471.8	1.2356	0.00365115	0.0188382	0.292751	-1.77225	down
MEDN0493	4-Methoxycinnamic acid	4-甲氧基肉桂酸	Phenolic acids	酚酸类	Phenolic acids	酚酸类	C10H10O3	3	0.8877	943-89-5	654826	619118	658911	61274.1	58294.5	58310	1.35465	0.0004341	0.00550064	0.0920289	-3.44177	down
MW0126948	Vilazodone	维拉佐酮	Others	其它类	Ketone compounds	酮类化合物	C26H27N5O2	3	0.8777	163521-12-8	50275.8	67868.7	48616.8	277637	314198	322762	1.34281	0.00077103	0.00761773	5.48447	2.45535	up
MW0123363	Citbismine C	花椒胺 C	Heterocyclic compounds	杂环化合物	Heterocyclic compounds	杂环化合物	C37H36N2O11	3	0.8757	169055-79-2	168038	196227	159638	565488	586702	538281	1.34632	3.97292e-05	0.00172186	3.22669	1.69006	up
MW0105439	Adouetine X	蛇婆子碱 X	Amino acids and derivatives	氨基酸及其衍生物	Amino acids and derivatives	氨基酸及其衍生物	C28H44N4O4	3	0.8499	19542-37-1	11019.8	13546.3	14960.7	5756.46	5468.69	8511.5	1.22598	0.0126662	0.0453583	0.499324	-1.00195	down
MEDP0046	Hexanoylglycine	己酰-L-甘氨酸	Amino acids and derivatives	氨基酸及其衍生物	Amino acids and derivatives	氨基酸及其衍生物	C8H15NO3	3	0.8493	24003-67-6	270607	199651	261587	114957	127738	116578	1.30177	0.0275692	0.0790594	0.490913	-1.02646	down
MW0149018	Estradiol-3-sulfate	雌二醇-17β-3-硫酸酯	Organic acids	有机酸	Organic acids	有机酸	C18H24O5S	3	0.8368	481-96-9	1455.22	348.27	912.38	8803.98	7519.65	4182.3	1.23599	0.0437925	0.110133	7.55041	2.91655	up
MEDN0222	Melezitose	D-松三糖	Others	其它类	Saccharides	糖类	C18H32O16	3	0.8258	597-12-6	188715	200606	202036	7873.23	5694.79	13305.9	1.33852	3.06374e-05	0.00164607	0.0454445	-4.45975	down
MW0157039	Sesartemin	色沙胺	Lignans and Coumarins	木脂素和香豆素	Lignans	木脂素	C23H26O8	3	0.8249	77394-27-5	319.42	143.82	111.85	556.37	460.73	295.79	1.04747	0.0710138	0.156442	2.28293	1.19089	up
MEDL02759	2-Hydroxyglutarate	2-羟基戊二酸	Organic acids	有机酸	Organic acids	有机酸	C5H8O5	3	0.8108	2889-31-8	91187	91398.9	90380.2	1.37657e+06	1.21542e+06	1.36116e+06	1.35433	0.00174647	0.0120146	14.4822	3.85621	up
MEDN1160	Mevalonate 5-phosphate	甲戊酸 5-磷酸酯	Organic acids	有机酸	Organic acids	有机酸	C6H13O7P	3	0.795	73566-35-5	376728	378117	436783	207478	209786	157354	1.30189	0.00154017	0.0111861	0.482213	-1.05226	down
MEDN1309	3-(Methylthio)propionic acid	3-甲硫基丙酸	Organic acids	有机酸	Organic acids	有机酸	C4H8O2S	3	0.7869	646-01-5	30813.6	41377.2	48341.1	12536.5	18186.7	16111.6	1.27241	0.0307054	0.0857089	0.388568	-1.36376	down
MEDP1614	Isopentenyl pyrophosphate	异戊烯焦磷酸	Organic acids	有机酸	Organic acids	有机酸	C5H12O7P2	3	0.7811	358-71-4	2533.27	565.59	1214.65	7660.65	8407.75	8536.15	1.23397	0.00227052	0.0139779	5.70407	2.51199	up
MW0138377	Hesperidin	橙皮素-7-O-芸香糖苷 (橙皮苷)	Flavonoids	黄酮	Flavanones	二氢黄酮	C28H34O15	3	0.78	520-26-3	84111.5	83861	75685.9	20873.1	45839.5	28988.1	1.22694	0.0129192	0.0459452	0.392766	-1.34826	down
MEDP2093	4'-Hydroxyflavone	4'-羟基黄酮	Flavonoids	黄酮	Flavones	黄酮	C15H10O3	3	0.7767	4143-63-9	400721	226547	204074	95729.4	72199	75525.3	1.2662	0.0855672	0.178382	0.292844	-1.77179	down
MEDL02231	Sennoside B	番泻苷 B	Quinones	醌类	Anthraquinone	蒽醌	C42H38O20	3	0.7712	128-57-4	5931.61	2270.07	6256.65	10386.1	10046.2	9073.89	1.04575	0.0489322	0.119097	2.04078	1.02912	up
MEDL00369	Glutamyl-phenylalanine	谷氨酰苯丙氨酸	Amino acids and derivatives	氨基酸及其衍生物	Amino acids and derivatives	氨基酸及其衍生物	C14H18N2O5	3	0.7681	20556-22-3	295214	277138	289674	727259	802353	737909	1.35124	0.0016351	0.0115166	2.63046	1.39531	up
MEDP0232	N-Acetyl-D-glucosamine	N-乙酰-D-葡萄糖胺	Alcohol and amines	醇、胺类	Amines	胺类	C8H15NO6	3	0.7665	7512-17-6	394.4	372.25	444.28	3295.07	3907.79	3678.31	1.35207	0.00273444	0.0157253	8.9858	3.16765	up
MEDL01744	Heterophylliin A	1,3-二-O-没食子酰-4,6-(S)-六羟基二苯甲酰基-β-D-葡萄糖; 榛子素 A	Tannins	鞣质	Tannin	鞣质	C34H26O22	3	0.7642	87687-52-3	2115.01	423.31	1009.51	3892.87	3186.75	3722.81	1.10151	0.0255903	0.0751412	3.0448	1.60635	up
MEDN0057	N-Acetyl-L-tyrosine	乙酰基L-酪氨酸	Amino acids and derivatives	氨基酸及其衍生物	Amino acids and derivatives	氨基酸及其衍生物	C11H13NO4	3	0.7576	537-55-3	21947.4	20616.9	18738.8	510.11	468.54	930.36	1.34446	0.00177801	0.0121364	0.0311405	-5.00506	down
MW0127912	2,3-Dihydroxycinnamic acid	反式-2，3-二羟基肉桂酸酯；（2E)-3-(2，3-二羟基苯基）丙-2-烯酸酯	Organic acids	有机酸	Organic acids	有机酸	C9H8O4	3	0.7543	38481-04-8	16529.2	6958.18	6294.58	54848.2	56752.5	52234	1.28221	0.00208302	0.0131985	5.50114	2.45973	up
Lmfn004093	Trilobatin	根皮素-4'-O-葡萄糖苷	Flavonoids	黄酮	Chalcones	查耳酮	C21H24O10	3	0.7529	4192-90-9	98099.4	80438.2	103361	12209.1	11093.8	16727.1	1.34034	0.00505024	0.0235015	0.142002	-2.81602	down
MW0142725	(-)-Glycinol	3,6,9-三羟基紫檀素	Flavonoids	黄酮	Flavones	黄酮	C15H12O5	3	0.7513	69393-95-9	84123.6	60381.8	86075.5	29333.5	18071.7	14847.9	1.28014	0.00887323	0.0354984	0.269984	-1.88906	down
MW0129998	5,7,2',4'-Tetrahydroxy-3-geranylflavone	5，7，2'，4'-四羟基-3-香叶基黄酮	Flavonoids	黄酮	Flavones	黄酮	C25H26O6	3	0.7503	376361-87-4	82100.3	81789.2	74641.9	243439	239542	239686	1.35273	1.023e-05	0.00116551	3.02965	1.59915	up
MEDL01927	Benzoylmalic acid	苯甲酰苹果酸	Phenolic acids	酚酸类	Phenolic acids	酚酸类	C11H10O6	3	0.7474	22138-51-8	148335	154395	130520	28045.3	17002	32806.4	1.31955	0.000385372	0.00516557	0.179697	-2.47636	down
MEDN1388	Sedoheptulose	景天庚酮糖	Others	其它类	Saccharides	糖类	C7H14O7	3	0.7471	3019-74-7	101611	97901.1	104238	284780	277894	286164	1.35388	1.63585e-06	0.000559718	2.79452	1.4826	up
MEDN0074	gamma-Glutamylcysteine	γ-L-谷氨酸-L-半胱氨酸	Amino acids and derivatives	氨基酸及其衍生物	Amino acids and derivatives	氨基酸及其衍生物	C8H14N2O5S	3	0.7461	636-58-8	4567.77	6311.6	5615.76	17386.1	16146	17181.7	1.33551	9.37153e-05	0.00248671	3.07447	1.62034	up
MW0154306	Narcotoline	那可托林	Alkaloids	生物碱	Isoquinoline alkaloids	异喹啉类生物碱	C21H21NO7	3	0.7447	521-40-4	340.33	1350.28	569.68	3310.05	2898.75	1608.65	1.12318	0.047472	0.116706	3.4586	1.79019	up
MEDN0812	4-Hydroxystyrene	4-羟基苯乙烯	Phenolic acids	酚酸类	Phenolic acids	酚酸类	C8H8O	3	0.7437	2628-17-3	59827.2	60955.8	40735.8	3258.57	1818.88	2292.91	1.34227	0.0156007	0.0527405	0.0456316	-4.45382	down
MEDL02214	Coumestrol	香豆雌酚	Lignans and Coumarins	木脂素和香豆素	Coumarins	香豆素	C15H8O5	3	0.7359	479-13-0	119262	139393	175804	40165.8	60116.3	45262.4	1.29749	0.0187203	0.0596863	0.335001	-1.57776	down
MEDL02666	Icaritin	淫羊藿黄素	Flavonoids	黄酮	Flavonols	黄酮醇	C21H20O6	3	0.7301	118525-40-9	36461.5	12569.2	35729.9	10981.2	1493.63	6453.01	1.04619	0.0947162	0.192178	0.22331	-2.16288	down
MEDL02571	Trigallic Acid	三没食子酸	Phenolic acids	酚酸类	Phenolic acids	酚酸类	C21H14O13	3	0.7294	2131-66-0	3591.79	2236.51	1117.16	9673.82	9778.48	9447.19	1.23873	0.00847357	0.0343506	4.16092	2.0569	up
MEDN0691	Maltitol	麦芽糖醇	Others	其它类	Saccharides	糖类	C12H24O11	3	0.7277	585-88-6	21527	17574.9	16887.6	36236.3	41353.2	41523.9	1.32014	0.000858527	0.00810056	2.12742	1.08911	up
MW0137297	Afzelechin-(4alpha->8)-afzelechin	阿夫儿茶精-(4A->8)-阿夫唑啉	Flavonoids	黄酮	Flavanols	黄烷醇类	C30H26O10	3	0.7238	101339-37-1	25846.5	40695.9	49481.3	15971.8	7934.21	18076.3	1.1537	0.0525361	0.124867	0.361843	-1.46657	down
MEDL02585	Veranisatin B	八角莽草毒素 B	Terpenoids	萜类	Sesquiterpenoids	倍半萜	C16H20O9	3	0.7169	153445-93-3	163291	175359	163587	60509.3	57679.2	65362.7	1.34997	0.000122422	0.00278408	0.365467	-1.45219	down
MW0112238	2-O-(4-O-Methyl-a-D-glucopyranuronosyl)-D-xylose	2-O-(4-O-Methyl-a-D-glucopyranuronosyl)-D-xylose	Others	其它类	Saccharides	糖类	C12H20O11	3	0.7161	7382-52-7	5518.96	5227.9	7907.39	3131.63	1565.1	4262.36	1.05216	0.0491777	0.119471	0.480271	-1.05808	down
MEDN0036	L-Alanyl-L-alanine	D-丙氨酰-D-丙氨酸	Amino acids and derivatives	氨基酸及其衍生物	Amino acids and derivatives	氨基酸及其衍生物	C6H12N2O3	3	0.7103	1948-31-8	1391.86	580.17	2118.72	14724.4	15306.3	15404	1.29744	0.000138589	0.00298334	11.1067	3.47336	up
MW0139010	Mulberrofuran A	桑呋喃A	Heterocyclic compounds	杂环化合物	Heterocyclic compounds	杂环化合物	C25H28O4	3	0.7077	68978-04-1	1555.02	848.35	2911.85	10846.2	9413.35	10236.1	1.26503	0.000639752	0.00690868	5.73741	2.5204	up
MW0052504	Ecabet	埃卡贝特	Organic acids	有机酸	Organic acids	有机酸	C20H28O5S	3	0.7056	86408-72-2	2256.3	4170.75	1826.89	118.7	834.15	268.21	1.17575	0.0722641	0.158178	0.147937	-2.75695	down
MW0115726	()-Anisoxide	茴香素	Heterocyclic compounds	杂环化合物	Heterocyclic compounds	杂环化合物	C14H18O	3	0.7044	643-49-2	15528.2	13087.2	18171.2	52786.7	61993.4	61663.5	1.3374	0.00119703	0.0098083	3.77124	1.91504	up
MW0125239	Murrayanine	九里香碱	Benzene and substituted derivatives	苯及其衍生物	Benzene and substituted derivatives	苯及其衍生物	C14H11NO2	3	0.7041	723-97-7	91.53	681	221.79	7061.23	6636.37	9721.09	1.28243	0.0139098	0.0484088	23.5525	4.55781	up
MEDL01999	Floionolic acid	9,10,18-三羟基硬脂酸	Lipids	脂质	Free fatty acids	游离脂肪酸	C18H36O5	3	0.6987	17705-68-9	7084.91	7161.63	7617.36	14683.6	15496	14567.9	1.35037	0.000128015	0.00285009	2.04664	1.03326	up
MEDL01726	6-Benzylaminopurine	6-苄基氨基嘌呤	Nucleotides and derivatives	核苷酸及其衍生物	Nucleotides and derivatives	核苷酸及其衍生物	C12H11N5	3	0.698	1214-39-7	21496.3	17351.8	20605.4	9805.14	9630.94	5044.65	1.21562	0.00496291	0.0232281	0.411763	-1.28012	down
MEDP1075	5,6-DHET	5,6-二羟基-8Z,11Z,14Z-二十碳三烯酸	Lipids	脂质	Free fatty acids	游离脂肪酸	C20H34O4	3	0.6917	213382-49-1	70300.9	76386.9	61428.2	194619	207003	185751	1.34259	0.000152813	0.00318408	2.82233	1.49689	up
MEDN0651	Succinic anhydride	琥珀酸酐	Organic acids	有机酸	Organic acids	有机酸	C4H4O3	3	0.6906	108-30-5	101822	98895.3	98351.2	35518.4	43278.4	39851.1	1.34434	0.000207114	0.00372531	0.396725	-1.33379	down
MW0111715	Xylobiose	木二糖	Others	其它类	Saccharides	糖类	C10H18O9	3	0.6904	6860-47-5 | 83113-52-4	12231.2	11426.6	10969.8	23187.5	23960.5	30822.9	1.31829	0.0248796	0.0734525	2.2517	1.17101	up
MW0132601	3-(3,4-dimethoxyphenyl)-7-hydroxy-4H-chromen-4-one	3-(3，4-二甲氧基苯基)-7-羟基-4H-苯并吡喃-4-酮	Flavonoids	黄酮	Flavones	黄酮	C17H14O5	3	0.6898	24160-14-3	6573.91	14249.8	14990	4485.63	3907.59	6986.8	1.0653	0.114677	0.221091	0.429446	-1.21945	down
MEDN1013	2'-Deoxyadenosine-5'-monophosphate	2'-脱氧腺苷-5'-单磷酸	Nucleotides and derivatives	核苷酸及其衍生物	Nucleotides and derivatives	核苷酸及其衍生物	C10H14N5O6P	3	0.6834	653-63-4	6108.31	4926.9	7464.92	24175.9	20536.2	16081.3	1.30362	0.0189645	0.0603173	3.28611	1.71638	up
MEDN1046	Pyrocatechol	邻苯二酚;儿茶酚	Phenolic acids	酚酸类	Phenolic acids	酚酸类	C6H6O2	3	0.6815	120-80-9	52901.8	49541.8	55379.6	1791.64	6287.19	6059.79	1.28889	3.30883e-05	0.00167509	0.0895852	-3.4806	down
MW0112914	Malonic semialdehyde	丙二酸半醛	Organic acids	有机酸	Organic acids	有机酸	C3H4O3	3	0.6785	926-61-4	118642	69632.3	39229.9	323948	272090	173826	1.1743	0.0353423	0.0944349	3.38395	1.75871	up
MEDL02595	3,3',4',5,6,7,8-Heptamethoxyflavone	3,5,6,7,8,3',4'-七甲氧基黄酮	Flavonoids	黄酮	Flavonols	黄酮醇	C22H24O9	3	0.6772	1178-24-1	20167.9	19119.3	22210.9	6349.78	6192.36	4839.96	1.33933	0.000693657	0.00730584	0.282645	-1.82294	down
MEDTP02757	beta-Glycerophosphoric acid	甘油 2-磷酸	GP	甘油磷脂类	GP	甘油磷脂类	C3H9O6P	3	0.677	17181-54-3	14006.5	5492.64	16581.2	352.72	1230.24	1881.87	1.21356	0.0808303	0.171221	0.0960312	-3.38035	down
MEDP1505	5-Methoxytryptophan	5-甲氧基色氨酸	Amino acids and derivatives	氨基酸及其衍生物	Amino acids and derivatives	氨基酸及其衍生物	C12H14N2O3	3	0.6725	2504-22-5	14114.3	17135.1	16230.8	177973	201047	178314	1.35282	0.00178409	0.0121364	11.7382	3.55314	up
MW0114763	L-(-)-Sorbose	L-(-)-山梨糖	Others	其它类	Saccharides	糖类	C6H12O6	3	0.6713	87-79-6	54424.2	49779.5	28005	22055.4	20917.2	20256.2	1.16182	0.105276	0.208277	0.478249	-1.06416	down
MW0052883	Farnesyl diphosphate	法尼焦磷酸	Organic acids	有机酸	Organic acids	有机酸	C15H28O7P2	3	0.6695	13058-04-3	3479.6	4645.69	2746.46	20246.3	20933	21571.4	1.33528	3.59783e-05	0.00167509	5.77191	2.52905	up
MW0139438	Pseudobaptigenin	野靛苷	Flavonoids	黄酮	Isoflavones	异黄酮	C16H10O5	3	0.6665	90-29-9	150768	182090	122887	51091.9	48551.8	37874.9	1.3159	0.0203619	0.0633968	0.301745	-1.7286	down
pmp000383	Liquiritin	甘草苷元-4'-O-葡萄糖苷 (甘草苷)	Flavonoids	黄酮	Flavanones	二氢黄酮	C21H22O9	3	0.6615	551-15-5	112695	108190	67830.6	23155.4	34923	37527.3	1.25708	0.0361875	0.0960792	0.33114	-1.59449	down
MW0005969	Acrivastine	阿伐斯汀	Benzene and substituted derivatives	苯及其衍生物	Benzene and substituted derivatives	苯及其衍生物	C22H24N2O2	3	0.6598	87848-99-5	153906	153036	145603	26051.8	27890.5	28202	1.3541	0.00021629	0.00383134	0.181516	-2.46183	down
MEDN0237	D-Glucuronic Acid	D-葡萄糖醛酸	Others	其它类	Saccharides	糖类	C6H10O7	3	0.6597	528-16-5	474.34	105.66	504.22	1356.58	1539.75	1463.2	1.14036	0.00643112	0.0278169	4.02089	2.00752	up
MW0151689	Ile-Trp	异亮氨酰-色氨酸	Amino acids and derivatives	氨基酸及其衍生物	Amino acids and derivatives	氨基酸及其衍生物	C17H23N3O3	3	0.653	13589-06-5	1221.22	1370.53	627.49	12048.8	16319.8	12924.3	1.32853	0.00878764	0.0352448	12.8269	3.6811	up
MW0000423	Rescinnamine	利血胺	Alkaloids	生物碱	Alkaloids	生物碱	C35H42N2O9	3	0.6481	24815-24-5	298.01	80.67	70.27	4243.74	3455.62	1056.38	1.25085	0.100976	0.201293	19.5027	4.2856	up
MW0119658	3-Isomangostin	3-异倒捻子素	Flavonoids	黄酮	Other Flavonoids	其它类黄酮	C24H26O6	3	0.6462	19275-46-8	6822.76	14315.1	20995.5	59524.9	68560.8	69340.9	1.25577	0.000762664	0.00758525	4.68576	2.22828	up
MW0103715	Zeatin riboside	反式玉米素核苷	Nucleotides and derivatives	核苷酸及其衍生物	Nucleotides and derivatives	核苷酸及其衍生物	C15H21N5O5	3	0.6456	6025-53-2 | 28542-78-1	58684.8	55794.7	58135.1	26246.9	27834.8	28815.2	1.35006	1.7041e-05	0.00128818	0.480242	-1.05817	down
MW0112142	2'-Fucosyl-D-lactose	2-岩藻糖半乳糖	Others	其它类	Saccharides	糖类	C18H32O15	3	0.6436	41263-94-9	41090.1	35565.6	32432.9	11036.7	15136.6	13171.5	1.32233	0.00447774	0.0217237	0.360669	-1.47125	down
MW0106552	3-Dihydropyridine-2,6-dicarboxylic acid	3-二氢吡啶-2,6-二羧酸	Heterocyclic compounds	杂环化合物	Heterocyclic compounds	杂环化合物	C18H18N2O8	3	0.6385	71199-31-0	284557	273780	277112	967482	1.02197e+06	1.05708e+06	1.35365	0.00107989	0.00923736	3.64658	1.86654	up
MW0147022	6-(3,3-Dimethylallyl)-1,5-dihydroxyxanthone	胡桐素B；6-(3，3-二甲基烯丙基)-1，5-二羟基口山酮	Flavonoids	黄酮	Other Flavonoids	其它类黄酮	C18H16O4	3	0.6379	17623-60-8	218860	212881	211275	38715.2	58487	57343.6	1.33186	0.000500628	0.00597172	0.240345	-2.05682	down
MW0006688	Cyperine	莎草碱	Benzene and substituted derivatives	苯及其衍生物	Benzene and substituted derivatives	苯及其衍生物	C15H16O4	3	0.633	33716-82-4	16294.2	18404.7	17320	132786	135976	134086	1.35417	3.4346e-07	0.000266836	7.74424	2.95312	up
MW0133646	10-Hydroxywarfarin	4-羟基-3-(2-羟基-3-氧代-1-苯基丁基)-2H-铬-2-酮	Others	其它类	Ketone compounds	酮类化合物	C19H16O5	3	0.6245	83219-99-2	183858	223946	196101	59523.7	76015.5	87845	1.31306	0.00154366	0.0111861	0.3699	-1.43479	down
MEDL02145	Procyanidin B1	原花青素 B1	Tannins	鞣质	Proanthocyanidins	原花青素	C30H26O12	3	0.6207	20315-25-7	7108.89	4688.68	5697.15	940.63	498.63	862.02	1.32173	0.015886	0.0534272	0.131541	-2.92641	down
MEDP0272	5-Hydroxyindoleacetic acid	5-羟基吲哚-3-乙酸	Alkaloids	生物碱	Plumerane	吲哚类生物碱	C10H9NO3	3	0.6201	54-16-0	104642	72979.8	104086	26868.3	20998.3	31134.2	1.31137	0.0172569	0.0566029	0.280435	-1.83426	down
MW0139637	Samarangenin B	桤木素B	Benzene and substituted derivatives	苯及其衍生物	Benzene and substituted derivatives	苯及其衍生物	C44H32O22	3	0.6194	147103-19-3	7455.2	2022.82	6630.36	828.71	1631.42	781.87	1.14581	0.122972	0.232599	0.201262	-2.31286	down
MW0010461	[8]-Dehydrogingerdione	1-脱氢-[8]-姜辣二酮	Phenolic acids	酚酸类	Phenolic acids	酚酸类	C19H26O4	3	0.6194	77334-08-8	57782.4	70277.8	59687.6	16831.2	15453	35699.8	1.21107	0.0108863	0.0409324	0.362103	-1.46553	down
MW0114028	Cadabicine	卡达比辛	Others	其它类	Others	其它	C25H29N3O4	3	0.6122	99964-83-7	2261.61	3157.2	2079.25	7208.53	3425.97	7707.28	1.11987	0.108534	0.212972	2.4462	1.29054	up
MW0141686	1-Acetoxypinoresinol	Acetoxypinoresinol	Lignans and Coumarins	木脂素和香豆素	Coumarins	香豆素	C22H24O8	3	0.6081	81426-14-4	13558.2	14630.8	5570.5	33663.2	49867.1	31271	1.19628	0.0269726	0.0778981	3.40056	1.76577	up
MW0134539	Hydroxyammeigin	5-羟基-6-(4-羟基-3-甲基丁酰基)-8，8-二甲基-4-苯基-2H，8H-吡喃并[2，3-f]色烯-2-酮	Others	其它类	Ketone compounds	酮类化合物	C25H24O6	3	0.6065	244162-29-6	114015	108012	85925.5	29672	52919.7	33051.9	1.26084	0.00499569	0.0233312	0.375525	-1.41302	down
MEDL02149	Acetaminophen glucuronide	P-醋氨酚-葡萄糖苷酸	Others	其它类	Ketone compounds	酮类化合物	C14H17NO8	3	0.6008	16110-10-4	12629.9	15956.8	18366.3	721.35	1072.78	873.98	1.34666	0.012215	0.0443118	0.0568251	-4.13733	down
MEDL02557	Melitric acid A	丹酚酸 I	Phenolic acids	酚酸类	Phenolic acids	酚酸类	C27H22O12	3	0.5952	153765-45-8	127290	147336	167741	43120.4	51356.8	5630.77	1.07097	0.00375631	0.0192369	0.226301	-2.14369	down
mws0895	Genistin	染料木苷(金雀异黄苷)	Flavonoids	黄酮	Isoflavones	异黄酮	C21H20O10	3	0.5868	529-59-9	58200.1	55266.5	60782	130180	119818	137411	1.34504	0.00271419	0.0156506	2.22331	1.15271	up
MW0130180	6,7,3',4'-Tetrahydroxyflavone	2-(3，4-二羟基苯基)-6，7-二羟基-4H-苯并吡喃-4-酮	Flavonoids	黄酮	Flavones	黄酮	C15H10O6	3	0.574	92915-82-7	17395	18227.5	18743.4	117.95	1275.92	765.09	1.25773	5.85983e-06	0.000949365	0.0397116	-4.65429	down
MW0114042	Casimiroedine	卡西定	Heterocyclic compounds	杂环化合物	Heterocyclic compounds	杂环化合物	C21H27N3O6	3	0.5681	5853-02-1	33675.8	24924.3	29032.9	115011	125790	138338	1.34198	0.00193132	0.0126952	4.32644	2.11318	up
MW0122915	Artobiloxanthoe	Artobiloxanthoe	Flavonoids	黄酮	Other Flavonoids	其它类黄酮	C25H22O7	3	0.546	121748-25-2	4932.57	7519.57	5209.21	1598.2	213.19	629.14	1.19915	0.012248	0.0443589	0.138185	-2.85533	down
MW0114185	De-O-methylsimmondsin	去-O-甲基西蒙新素	Others	其它类	Saccharides	糖类	C15H23NO9	3	0.5272	135105-75-8	670.11	295.02	124.67	9655.16	22421.7	18236.9	1.30654	0.048411	0.11836	46.1679	5.52882	up
MW0130772	(R)-2-Feruloyl-1-(4-Hydroxyphenyl)-1,2-ethanediol	(R)-2-阿魏酰-1-(4-羟基苯基)-1,2-乙二醇	Others	其它类	Lactones	内酯类化合物	C18H18O6	3	0.5252	177795-29-8	81449.9	83407.2	86187.9	16885.6	18026.8	33702	1.28762	0.00540523	0.0246592	0.273315	-1.87136	down
MW0135553	Naringenin-4'-o-beta-d-glucuronide	Naringenin-4'-o-beta-d-glucuronide	Flavonoids	黄酮	Chalcones	查耳酮	C21H20O11	2	0.853	-	71134.2	73004.5	66911.4	28931.4	33851.1	31516.4	1.3437	0.000102288	0.00256747	0.446808	-1.16227	down
MW0132728	3,5-Dihydroxy-2-(4-methoxyphenyl)-8-(3-methylbut-2-enyl)-7-[3,4,5-trihydroxy-6-(hydroxymethyl)oxan-2-yl]oxychromen-4-one	3,5-二羟基-2-(4-甲氧基苯基)-8-(3-甲基-2-烯-1-基)-7-{[3,4,5-三羟基-6-(羟甲基）氧代-2-基]氧基]-4H-铬-4-酮	Others	其它类	Ketone compounds	酮类化合物	C27H30O11	2	0.8432	-	15943.6	14189.1	19778.9	38858.4	31558.3	35036.1	1.29658	0.00281324	0.0160429	2.11279	1.07915	up
MW0002271	2,4-Dihydroxybenzophenone	2，4-二羟基二苯甲酮	Benzene and substituted derivatives	苯及其衍生物	Benzene and substituted derivatives	苯及其衍生物	C13H10O3	2	0.834	-	22189.9	22471.5	23732.4	5045.03	9357.72	4372.89	1.27976	0.00529823	0.0243309	0.274522	-1.865	down
MW0138618	Kaempferol 3-[6''-(3-hydroxy-3-methylglutaryl)glucoside]-7-glucoside	山奈酚 3-[6''-(3-hydroxy-3-methylglutaryl)glucoside]-7-glucoside	Flavonoids	黄酮	Flavonols	黄酮醇	C33H38O20	2	0.7955	-	58342.3	167635	66892.5	36470.3	26226.8	31414.1	1.1245	0.198886	0.330934	0.321341	-1.63782	down
MEDP1649	3-O-Methyl-a-methyldopa	3-O-甲基-酪氨酸	Amino acids and derivatives	氨基酸及其衍生物	Amino acids and derivatives	氨基酸及其衍生物	C10H13NO4	2	0.7789	-	94357.2	85794.9	89263.4	12562.7	12530.5	15251.1	1.35128	0.000306752	0.00456793	0.149748	-2.7394	down
MW0115119	Phenol glucuronide	苯基葡萄糖醛酸	Benzene and substituted derivatives	苯及其衍生物	Benzene and substituted derivatives	苯及其衍生物	C12H14O7	2	0.777	-	61815.1	60163.5	65732.3	140495	142278	142096	1.35213	0.000115981	0.00271983	2.26342	1.1785	up
MW0134494	Naringenin 7-0-glucoside	5-羟基-2-(4-羟基苯基)-7-{[3,4,5-三羟基-6-(羟甲基）氧代-2-基]氧基}-3,4-二氢-2H-1-苯并吡喃-4-酮	Benzene and substituted derivatives	苯及其衍生物	Benzene and substituted derivatives	苯及其衍生物	C21H22O10	2	0.7633	-	145096	154514	148318	59351.5	49208.5	23392.8	1.24014	0.00712762	0.0301279	0.294585	-1.76324	down
MW0122491	7-Hydroxymethotrexate	7-羟甲氨蝶呤	Heterocyclic compounds	杂环化合物	Heterocyclic compounds	杂环化合物	C20H22N8O6	2	0.7542	-	4449.27	2730.12	4878.38	65547.1	70026.4	63919.7	1.34386	0.000238469	0.00401628	16.5448	4.0483	up
MW0008784	N(4)-Acetylsulfamethazine	N4-乙酰基磺胺嘧啶	Benzene and substituted derivatives	苯及其衍生物	Benzene and substituted derivatives	苯及其衍生物	C14H16N4O3S	2	0.7485	-	73536	75543.4	75333.4	17879.6	22737.2	21310.2	1.34649	0.000104534	0.00259379	0.275951	-1.85751	down
MW0109201	Phenylalanylcysteine	Phe Cys	Amino acids and derivatives	氨基酸及其衍生物	Amino acids and derivatives	氨基酸及其衍生物	C12H16N2O3S	2	0.7269	-	1247.61	280.22	882.28	7983.21	10330.6	16857.6	1.2755	0.0528535	0.1254	14.5933	3.86723	up
MW0011287	(3S,7E,9R)-4,7-Megastigmadiene-3,9-diol 9-[apiosyl-(1->6)-glucoside]	(3S,7E,9R)-4,7-Megastigmadiene-3,9-diol 9-[apiosyl-(1->6)-glucoside]	Others	其它类	Saccharides	糖类	C24H40O11	3	0.9969	-	60999.1	78976.6	79053.6	22280	22830.6	20057.8	1.33829	0.0121632	0.0442223	0.297533	-1.74888	down
MW0058345	PE(18:3(6Z,9Z,12Z)/P-18:1(11Z))	PE(18:3(6Z,9Z,12Z)/P-18:1(11Z))	GP	甘油磷脂类	PE	磷脂酰乙醇胺	C41H74NO7P	3	0.99	-	106178	53565.4	25938.4	14603.7	541.75	6819.74	1.0506	0.142536	0.259876	0.118295	-3.07954	down
MW0139153	N'-Hydroxyneosaxitoxin	N'-羟基新蛤毒素	Amino acids and derivatives	氨基酸及其衍生物	Amino acids and derivatives	氨基酸及其衍生物	C10H17N7O6	3	0.943	-	16259.6	19469	15017.1	43855.1	46775.1	42580.8	1.33624	0.000114435	0.00271512	2.62507	1.39236	up
MEDN0220	Glucose	葡萄糖	Others	其它类	Saccharides	糖类	C6H12O6	3	0.9336	-	261391	237889	246066	72072.5	73774.2	83776	1.34931	0.000186526	0.00348499	0.308075	-1.69865	down
[truncated: 396 more rows]
