# Supplementary material
Source: Research Square preprint supplement (doi:10.21203/rs.3.rs-10078689/v1)
Supplement: Supplementary file 2 [file 55f66544cc8894bd9714bf6c.xlsx]

## Sheet: S3
GeneID	Length	G-Expression	H-Expression	log2FoldChange(H/G)	Pvalue	Padj	Up/Down-Regulation(H/G)	KEGG_ANNOT	KEGG_pathway	GO_MF	GO_BP	GO_CC	COG_Description	Gene_description
Cla97C00G000530	2475	8.80981	0.311552	-4.70119	0.00117005	0.00673665	Down	NA	NA	NA	NA	NA	beta-galactosidase	Beta-galactosidase
Cla97C01G000020	318	811.789	302.157	-1.42544	4.07e-53	4.9e-51	Down	NA	NA	NA	NA	NA	cellular response to sulfur starvation	Response to low sulfur protein, putative
Cla97C01G000110	684	179.383	52.9404	-1.76208	4.27e-18	1.76e-16	Down	K13993 HSP20; HSP20 family protein	ko04141:Protein processing in endoplasmic reticulum	GO:0003674;GO:0005488;GO:0005515;GO:0043621;	GO:0000302;GO:0006355;GO:0006950;GO:0006979;GO:0006996;GO:0008150;GO:0009266;GO:0009314;GO:0009408;GO:0009416;GO:0009628;GO:0009636;GO:0009642;GO:0009644;GO:0009657;GO:0009658;GO:0009889;GO:0009987;GO:0010035;GO:0010468;GO:0010556;GO:0016043;GO:0019219;GO:0019222;GO:0031323;GO:0031326;GO:0042221;GO:0042493;GO:0042542;GO:0046677;GO:0050789;GO:0050794;GO:0050896;GO:0051171;GO:0051252;GO:0060255;GO:…	GO:0005575;GO:0005622;GO:0005623;GO:0005737;GO:0009295;GO:0009507;GO:0009532;GO:0009536;GO:0009570;GO:0032991;GO:0042644;GO:0042646;GO:0043226;GO:0043227;GO:0043228;GO:0043229;GO:0043231;GO:0043232;GO:0044422;GO:0044424;GO:0044434;GO:0044435;GO:0044444;GO:0044446;GO:0044464;GO:0101031;	small heat shock protein	small heat shock protein, chloroplastic
Cla97C01G000440	522	31.7086	13.6396	-1.21735	0.00390719	0.0187653	Down	NA	NA	NA	NA	NA	At4g00950-like	DUF688 domain-containing protein
Cla97C01G000480	1815	268.207	132.133	-1.02322	4.23e-12	1.05e-10	Down	NA	NA	GO:0003674;GO:0003824;GO:0004857;GO:0016787;GO:0016788;GO:0030234;GO:0030599;GO:0046910;GO:0052689;GO:0098772;	GO:0008150;GO:0043086;GO:0044092;GO:0050790;GO:0065007;GO:0065009;	GO:0005575;GO:0005623;GO:0044464;GO:0071944;	pectinesterase pectinesterase inhibitor	Pectinesterase
Cla97C01G000840	570	37.5162	18.3808	-1.03037	0.00514736	0.023604	Down	NA	NA	NA	NA	NA	NA	WD repeat-containing protein 91-like protein
Cla97C01G002480	870	28.7802	4.15081	-2.80173	3.13e-06	3.48e-05	Down	K15746 crtZ; beta-carotene 3-hydroxylase [EC:1.14.15.24]	ko00906:Carotenoid biosynthesis	NA	NA	NA	Belongs to the sterol desaturase family	Beta-carotene hydroxylase
Cla97C01G002490	264	461.97	203.915	-1.17807	9.17e-25	5.3e-23	Down	NA	NA	NA	NA	NA	NA	Unknown protein
Cla97C01G003110	1185	1294.64	524.815	-1.30249	6.09e-70	1.02e-67	Down	K09419 HSFF; heat shock transcription factor, other eukaryote	NA	GO:0003674;GO:0003700;GO:0140110;	GO:0006355;GO:0008150;GO:0009889;GO:0009890;GO:0009892;GO:0010033;GO:0010200;GO:0010243;GO:0010468;GO:0010556;GO:0010558;GO:0010605;GO:0010629;GO:0019219;GO:0019222;GO:0031323;GO:0031324;GO:0031326;GO:0031327;GO:0042221;GO:0042493;GO:0045892;GO:0045934;GO:0048519;GO:0048523;GO:0050789;GO:0050794;GO:0050896;GO:0051171;GO:0051172;GO:0051252;GO:0051253;GO:0060255;GO:0065007;GO:0080090;GO:1901698;GO:…	NA	Heat Stress Transcription Factor	heat stress transcription factor B-2b
Cla97C01G003420	606	562.524	11.4153	-5.62324	2.42e-102	5.44e-100	Down	NA	NA	NA	NA	NA	Transcription factor	BHLH transcription factor
Cla97C01G005230	1449	122.754	51.9942	-1.23888	2.66e-08	4.14e-07	Down	K01179 E3.2.1.4; endoglucanase [EC:3.2.1.4]	ko00500:Starch and sucrose metabolism	NA	NA	NA	Belongs to the glycosyl hydrolase 5 (cellulase A) family	Mannan endo-1,4-beta-mannosidase
Cla97C01G005660	501	32.2592	5.07914	-2.67274	4.01e-06	4.37e-05	Down	NA	NA	NA	NA	NA	Olee1-like	olee1-like protein
Cla97C01G005690	1563	958.258	252.451	-1.92507	5.19e-79	9.35e-77	Down	K13783 SLC37A1_2; MFS transporter, OPA family, solute carrier family 37 (glycerol-3-phosphate transporter), member 1/2	NA	NA	GO:0008150;GO:0042592;GO:0048878;GO:0050801;GO:0055062;GO:0055081;GO:0055083;GO:0065007;GO:0065008;GO:0072505;GO:0072506;GO:0098771;	NA	glycerol-3-phosphate transporter	MFS domain-containing protein
Cla97C01G006380	411	154.228	7.28887	-4.40377	3.65e-35	2.98e-33	Down	NA	NA	NA	NA	NA	Chaperone protein	Chaperone protein DnaJ isoform X1
Cla97C01G006560	735	153.641	23.7658	-2.69302	1.6e-28	1.07e-26	Down	NA	NA	NA	NA	NA	B3 domain-containing protein	B3 domain-containing protein At2g31420-like
Cla97C01G006690	1548	109.243	30.7745	-1.83141	4.63e-13	1.26e-11	Down	K01051 E3.1.1.11; pectinesterase [EC:3.1.1.11]	ko00040:Pentose and glucuronate interconversions	GO:0003674;GO:0003824;GO:0004857;GO:0016787;GO:0016788;GO:0030234;GO:0030599;GO:0046910;GO:0052689;GO:0098772;	GO:0008150;GO:0043086;GO:0044092;GO:0050790;GO:0065007;GO:0065009;	GO:0005575;GO:0005623;GO:0044464;GO:0071944;	Acts in the modification of cell walls via demethylesterification of cell wall pectin	Pectinesterase
Cla97C01G007540	1707	24.3732	3.5023	-2.79855	3.58e-05	0.000316037	Down	K01051 E3.1.1.11; pectinesterase [EC:3.1.1.11]	ko00040:Pentose and glucuronate interconversions	GO:0003674;GO:0003824;GO:0004857;GO:0016787;GO:0016788;GO:0030234;GO:0030599;GO:0046910;GO:0052689;GO:0098772;	GO:0008150;GO:0043086;GO:0044092;GO:0050790;GO:0065007;GO:0065009;	GO:0005575;GO:0005623;GO:0044464;GO:0071944;	Pectinesterase	Pectinesterase
Cla97C01G007580	1536	1449.87	697.369	-1.05563	3.84e-60	5.2e-58	Down	K01881 PARS, proS; prolyl-tRNA synthetase [EC:6.1.1.15]	ko00970:Aminoacyl-tRNA biosynthesis	GO:0003674;GO:0003824;GO:0004812;GO:0004827;GO:0016874;GO:0016875;GO:0140098;GO:0140101;	GO:0006082;GO:0006139;GO:0006399;GO:0006412;GO:0006418;GO:0006433;GO:0006518;GO:0006520;GO:0006725;GO:0006807;GO:0008150;GO:0008152;GO:0009058;GO:0009059;GO:0009987;GO:0010467;GO:0016070;GO:0019538;GO:0019752;GO:0034641;GO:0034645;GO:0034660;GO:0043038;GO:0043039;GO:0043043;GO:0043170;GO:0043436;GO:0043603;GO:0043604;GO:0044237;GO:0044238;GO:0044249;GO:0044260;GO:0044267;GO:0044271;GO:0044281;GO:…	GO:0005575;GO:0005622;GO:0005623;GO:0005737;GO:0005829;GO:0005911;GO:0009506;GO:0016020;GO:0017101;GO:0030054;GO:0032991;GO:0044424;GO:0044444;GO:0044464;GO:0055044;	proline--tRNA ligase	Prolyl-tRNA synthetase
Cla97C01G008530	945	966.517	462.705	-1.06286	5.89e-39	5.46e-37	Down	K11982 RNF115_126; E3 ubiquitin-protein ligase RNF115/126 [EC:2.3.2.27]	NA	GO:0003674;GO:0003824;GO:0004842;GO:0016740;GO:0019787;GO:0061630;GO:0061659;GO:0140096;	GO:0000209;GO:0006464;GO:0006508;GO:0006511;GO:0006807;GO:0008150;GO:0008152;GO:0009056;GO:0009057;GO:0009987;GO:0010498;GO:0016567;GO:0019538;GO:0019941;GO:0030163;GO:0032446;GO:0036211;GO:0043161;GO:0043170;GO:0043412;GO:0043632;GO:0044237;GO:0044238;GO:0044248;GO:0044257;GO:0044260;GO:0044265;GO:0044267;GO:0051603;GO:0070647;GO:0071704;GO:1901564;GO:1901565;GO:1901575;	NA	E3 ubiquitin-protein ligase RING1-like	RING-type E3 ubiquitin transferase
Cla97C01G008540	203	157.355	73.5458	-1.09753	3.71e-09	6.49e-08	Down	NA	NA	NA	NA	NA	NA	Unknown protein
Cla97C01G008880	519	521.514	46.2727	-3.49398	8.18e-107	1.92e-104	Down	NA	NA	GO:0000166;GO:0003674;GO:0005488;GO:0008144;GO:0016208;GO:0017076;GO:0030554;GO:0032553;GO:0032555;GO:0032559;GO:0036094;GO:0043167;GO:0043168;GO:0043169;GO:0097159;GO:0097367;GO:1901265;GO:1901363;	NA	GO:0005575;GO:0005623;GO:0005886;GO:0016020;GO:0044464;GO:0071944;	Universal stress protein A-like protein	Adenine nucleotide alpha hydrolases-like superfamily protein
Cla97C01G008920	426	2290.97	460.112	-2.31571	9.39e-273	8.24e-270	Down	K13993 HSP20; HSP20 family protein	ko04141:Protein processing in endoplasmic reticulum	NA	GO:0000302;GO:0006457;GO:0006950;GO:0006979;GO:0008150;GO:0009266;GO:0009408;GO:0009628;GO:0009987;GO:0042221;GO:0050896;GO:1901700;	GO:0005575;GO:0005622;GO:0005623;GO:0005737;GO:0005777;GO:0005782;GO:0031907;GO:0031974;GO:0042579;GO:0043226;GO:0043227;GO:0043229;GO:0043231;GO:0043233;GO:0044422;GO:0044424;GO:0044438;GO:0044439;GO:0044444;GO:0044446;GO:0044464;GO:0070013;	Belongs to the small heat shock protein (HSP20) family	15.7 kDa heat shock protein, peroxisomal
Cla97C01G008930	1569	35.1535	12.9162	-1.4444	0.00117738	0.00677304	Down	K07195 EXOC7, EXO70; exocyst complex component 7	NA	NA	NA	NA	exocyst complex component	Exocyst subunit Exo70 family protein
Cla97C01G009560	558	58.743	19.2974	-1.60269	8.11e-07	1.01e-05	Down	NA	NA	NA	NA	NA	Protein PHLOEM PROTEIN 2-LIKE A9-like	protein PHLOEM PROTEIN 2-LIKE A9-like
Cla97C01G010660	717	25.5105	1.26717	-4.33421	4.3e-07	5.64e-06	Down	NA	NA	NA	NA	NA	NA	X-linked retinitis pigmentosa GTPase regulator-interacting protein 1-like
Cla97C01G011610	1446	99.1351	32.2694	-1.62111	5.49e-10	1.08e-08	Down	K14431 TGA; transcription factor TGA	ko04075:Plant hormone signal transduction	NA	NA	NA	transcription factor	transcription factor TGA9-like
Cla97C01G011880	984	5358.48	2479.94	-1.11208	2.9e-137	9.28e-135	Down	K12836 U2AF1; splicing factor U2AF 35 kDa subunit	ko03040:Spliceosome	NA	NA	NA	Splicing factor U2af small subunit	Splicing factor U2af small subunit B-like
Cla97C01G012760	510	323.931	150.581	-1.10691	8.79e-16	2.99e-14	Down	NA	NA	NA	NA	NA	Senescence regulator	Protein of unknown function, DUF584
Cla97C01G012820	837	12151	4621.67	-1.3945	1.33e-249	9.59e-247	Down	K11252 H2B; histone H2B	NA	NA	NA	NA	Core histone H2A/H2B/H3/H4	Histone H2B
Cla97C01G013060	1005	4.53177	0	-4.69479	0.00389228	0.0187203	Down	K00430 E1.11.1.7; peroxidase [EC:1.11.1.7]	ko00940:Phenylpropanoid biosynthesis	GO:0003674;GO:0003824;GO:0004553;GO:0009044;GO:0016787;GO:0016798;GO:0097599;	NA	NA	Belongs to the peroxidase family. Classical plant (class III) peroxidase subfamily	Peroxidase
Cla97C01G013690	861	20.9047	1.8874	-3.46071	7.31e-06	7.54e-05	Down	K09873 TIP; aquaporin TIP	NA	GO:0003674;GO:0005215;GO:0005372;GO:0015250;GO:0015267;GO:0015318;GO:0022803;GO:0022838;GO:0022857;	GO:0000003;GO:0003006;GO:0006810;GO:0006811;GO:0006833;GO:0006914;GO:0007275;GO:0008150;GO:0008152;GO:0009056;GO:0009791;GO:0009987;GO:0010154;GO:0010431;GO:0021700;GO:0022414;GO:0032501;GO:0032502;GO:0032504;GO:0034220;GO:0042044;GO:0044237;GO:0044248;GO:0048316;GO:0048608;GO:0048609;GO:0048731;GO:0048856;GO:0051179;GO:0051234;GO:0055085;GO:0061458;GO:0061919;GO:0071695;	GO:0000322;GO:0000325;GO:0000326;GO:0005575;GO:0005622;GO:0005623;GO:0005737;GO:0005773;GO:0005774;GO:0005886;GO:0005887;GO:0009705;GO:0016020;GO:0016021;GO:0031090;GO:0031224;GO:0031226;GO:0032586;GO:0042807;GO:0043226;GO:0043227;GO:0043229;GO:0043231;GO:0044422;GO:0044424;GO:0044425;GO:0044437;GO:0044444;GO:0044446;GO:0044459;GO:0044464;GO:0071944;GO:0098588;GO:0098805;	Belongs to the MIP aquaporin (TC 1.A.8) family	tonoplast intrinsic protein 2
Cla97C01G014100	642	29.3942	12.0415	-1.29018	0.00437599	0.0205546	Down	NA	NA	GO:0003674;GO:0003824;GO:0016787;	GO:0008150;GO:0008152;GO:0009056;	NA	Carboxylesterase	alpha/beta-Hydrolases superfamily protein
Cla97C01G015630	840	4.60712	0	-4.71343	0.00412155	0.0195943	Down	NA	NA	GO:0003674;GO:0003824;GO:0016787;GO:0016788;GO:0016829;GO:0016830;GO:0016832;GO:0046593;GO:0052689;GO:0080030;GO:0080031;GO:0080032;	GO:0002376;GO:0006082;GO:0006725;GO:0006950;GO:0006952;GO:0006955;GO:0008150;GO:0008152;GO:0009056;GO:0009605;GO:0009607;GO:0009611;GO:0009620;GO:0009627;GO:0009696;GO:0009814;GO:0009817;GO:0009987;GO:0010817;GO:0016137;GO:0016139;GO:0016999;GO:0017144;GO:0018958;GO:0019752;GO:0032787;GO:0042445;GO:0042537;GO:0043207;GO:0043436;GO:0044237;GO:0044281;GO:0045087;GO:0050832;GO:0050896;GO:0051704;GO:…	NA	salicylic acid-binding protein 2-like	salicylic acid-binding protein 2-like
Cla97C01G015640	816	299.98	148.508	-1.01443	2.65e-12	6.71e-11	Down	NA	NA	GO:0003674;GO:0003824;GO:0016787;	NA	NA	Alpha/beta hydrolase family	AB hydrolase-1 domain-containing protein
Cla97C01G015900	891	274.087	82.0499	-1.74013	7.27e-28	4.75e-26	Down	K09419 HSFF; heat shock transcription factor, other eukaryote	NA	GO:0003674;GO:0003700;GO:0140110;	GO:0006355;GO:0006950;GO:0008150;GO:0009266;GO:0009408;GO:0009628;GO:0009889;GO:0009890;GO:0009892;GO:0010468;GO:0010556;GO:0010558;GO:0010605;GO:0010629;GO:0019219;GO:0019222;GO:0031323;GO:0031324;GO:0031326;GO:0031327;GO:0045892;GO:0045934;GO:0048519;GO:0048523;GO:0050789;GO:0050794;GO:0050896;GO:0051171;GO:0051172;GO:0051252;GO:0051253;GO:0060255;GO:0065007;GO:0080090;GO:1902679;GO:1903506;GO:…	GO:0005575;GO:0005622;GO:0005623;GO:0005634;GO:0043226;GO:0043227;GO:0043229;GO:0043231;GO:0044424;GO:0044464;	heat shock factor protein	Heat shock transcription factor
Cla97C01G015940	1206	1408.15	691.717	-1.02512	3.31e-53	4e-51	Down	NA	NA	NA	NA	NA	Remorin, C-terminal region	Remorin_C domain-containing protein
Cla97C01G015950	201	123.061	47.5951	-1.37076	1.2e-09	2.24e-08	Down	NA	NA	NA	NA	NA	NA	Unknown protein
Cla97C01G015960	1446	1539.64	723.198	-1.09083	1.67e-60	2.3e-58	Down	NA	NA	NA	NA	GO:0005575;GO:0005576;GO:0005615;GO:0044421;	triglyceride lipase activity	Lipase_3 domain-containing protein
Cla97C01G015980	1455	97.5008	6.68673	-3.87124	9.62e-23	5.06e-21	Down	NA	NA	NA	NA	GO:0005575;GO:0005576;GO:0005615;GO:0044421;	triglyceride lipase activity	Lipase_3 domain-containing protein
Cla97C01G016060	207	122.841	33.2044	-1.88585	1.21e-13	3.46e-12	Down	NA	NA	NA	NA	NA	NA	Unknown protein
Cla97C01G016350	1824	257.747	85.1288	-1.59545	1.43e-22	7.44e-21	Down	K14487 GH3; auxin responsive GH3 gene family	ko04075:Plant hormone signal transduction	GO:0003674;GO:0003824;GO:0010279;GO:0016874;GO:0016879;GO:0016881;	GO:0008150;GO:0009314;GO:0009416;GO:0009628;GO:0009719;GO:0009725;GO:0009733;GO:0010033;GO:0010252;GO:0042221;GO:0042592;GO:0048878;GO:0050896;GO:0065007;GO:0065008;	NA	Indole-3-acetic acid-amido synthetase	Auxin-responsive GH3 family protein
Cla97C01G017090	1434	8.29881	0	-5.57045	0.000109998	0.000861297	Down	K01762 ACS; 1-aminocyclopropane-1-carboxylate synthase [EC:4.4.1.14]	ko00270:Cysteine and methionine metabolism	NA	NA	NA	1-aminocyclopropane-1-carboxylate synthase	1-aminocyclopropane-1-carboxylate synthase
Cla97C01G017110	954	7.20814	0	-5.35385	0.000345533	0.00233745	Down	K09422 MYBP; transcription factor MYB, plant	NA	GO:0000981;GO:0001067;GO:0001134;GO:0001135;GO:0003674;GO:0003676;GO:0003677;GO:0003700;GO:0005488;GO:0043565;GO:0044212;GO:0097159;GO:0140110;GO:1901363;GO:0005515;GO:0008134;	GO:0001101;GO:0006355;GO:0006357;GO:0008150;GO:0009719;GO:0009725;GO:0009751;GO:0009889;GO:0009987;GO:0010033;GO:0010468;GO:0010556;GO:0014070;GO:0019219;GO:0019222;GO:0030154;GO:0031323;GO:0031326;GO:0032502;GO:0042221;GO:0042493;GO:0046677;GO:0048869;GO:0050789;GO:0050794;GO:0050896;GO:0051171;GO:0051252;GO:0060255;GO:0065007;GO:0080090;GO:1901700;GO:1903506;GO:2000112;GO:2001141;GO:0008152;GO:…	GO:0005575;GO:0005622;GO:0005623;GO:0005634;GO:0043226;GO:0043227;GO:0043229;GO:0043231;GO:0044424;GO:0044464;	transcription factor	transcription factor RAX2
Cla97C01G017510	2082	65.4972	10.1468	-2.69268	4.96e-13	1.35e-11	Down	K18195 RGL4, rhiE; rhamnogalacturonan endolyase [EC:4.2.2.23]	NA	NA	NA	NA	Rhamnogalacturonate lyase	Rhamnogalacturonan endolyase
Cla97C01G017630	1425	191.051	88.2236	-1.11502	6.97e-11	1.52e-09	Down	NA	NA	NA	NA	NA	UDP-glycosyltransferase 91A1-like	UDP-glycosyltransferase 91A1-like
Cla97C01G017720	687	88.4535	20.945	-2.08326	1.14e-11	2.71e-10	Down	NA	NA	GO:0000900;GO:0003674;GO:0003676;GO:0003677;GO:0003700;GO:0005488;GO:0030371;GO:0043565;GO:0045182;GO:0090079;GO:0097159;GO:0140110;GO:1901363;	GO:0000003;GO:0003006;GO:0006355;GO:0006417;GO:0007275;GO:0008150;GO:0009266;GO:0009628;GO:0009791;GO:0009889;GO:0009890;GO:0009892;GO:0009908;GO:0009909;GO:0009910;GO:0009987;GO:0010468;GO:0010556;GO:0010558;GO:0010605;GO:0010608;GO:0010629;GO:0017148;GO:0019219;GO:0019222;GO:0022414;GO:0030154;GO:0031323;GO:0031324;GO:0031326;GO:0031327;GO:0032268;GO:0032269;GO:0032501;GO:0032502;GO:0034248;GO:…	GO:0005575;GO:0005622;GO:0005623;GO:0005634;GO:0043226;GO:0043227;GO:0043229;GO:0043231;GO:0044424;GO:0044464;	MADS-box protein	MADS-box protein SVP-like
Cla97C01G017890	1299	73.6658	33.9168	-1.12225	3.45e-05	0.000306596	Down	K03327 TC.MATE, SLC47A, norM, mdtK, dinF; multidrug resistance protein, MATE family	NA	GO:0003674;GO:0005215;GO:0015238;GO:0022857;	GO:0006810;GO:0006855;GO:0008150;GO:0015893;GO:0042221;GO:0042493;GO:0050896;GO:0051179;GO:0051234;GO:0055085;	NA	Belongs to the multi antimicrobial extrusion (MATE) (TC 2.A.66.1) family	Protein DETOXIFICATION
Cla97C01G018750	663	1009.12	107.272	-3.23194	5.39e-187	2.47e-184	Down	K09338 HD-ZIP; homeobox-leucine zipper protein	NA	GO:0003674;GO:0003700;GO:0140110;	GO:0006355;GO:0008150;GO:0009719;GO:0009725;GO:0009733;GO:0009889;GO:0010033;GO:0010468;GO:0010556;GO:0019219;GO:0019222;GO:0031323;GO:0031326;GO:0042221;GO:0050789;GO:0050794;GO:0050896;GO:0051171;GO:0051252;GO:0060255;GO:0065007;GO:0080090;GO:1903506;GO:2000112;GO:2001141;GO:0008152;GO:0006139;GO:0006351;GO:0006725;GO:0006807;GO:0009058;GO:0009059;GO:0009987;GO:0010467;GO:0016070;GO:0018130;GO:…	NA	Homeobox-leucine zipper protein	homeobox-leucine zipper protein ATHB-40
Cla97C01G020160	552	55.7788	3.81069	-3.87562	5.62e-14	1.67e-12	Down	NA	NA	GO:0003674;GO:0003824;GO:0004792;GO:0016740;GO:0016782;GO:0016783;	GO:0001101;GO:0006950;GO:0006979;GO:0007568;GO:0008150;GO:0009611;GO:0009719;GO:0009725;GO:0009753;GO:0010033;GO:0032502;GO:0042221;GO:0050896;GO:1901700;	GO:0005575;GO:0005622;GO:0005623;GO:0005737;GO:0009507;GO:0009536;GO:0043226;GO:0043227;GO:0043229;GO:0043231;GO:0044424;GO:0044444;GO:0044464;	Thiosulfate sulfurtransferase 16	thiosulfate sulfurtransferase 16, chloroplastic
Cla97C01G020240	1011	25.3747	8.88855	-1.51537	0.00221827	0.0116221	Down	NA	NA	NA	NA	NA	Arabidopsis protein of unknown function	Arabidopsis protein of unknown function (DUF241)
Cla97C01G022350	231	24.9118	7.89388	-1.65196	0.00138316	0.00776431	Down	NA	NA	NA	NA	NA	Wound-induced protein	Wound induced protein-like
Cla97C01G022500	708	31.5305	10.1528	-1.63774	0.000254074	0.00179264	Down	NA	NA	NA	NA	NA	NA	Unknown protein
Cla97C01G022530	750	75.8227	20.6125	-1.88197	3.63e-10	7.34e-09	Down	NA	NA	NA	NA	NA	NA	Unknown protein
Cla97C01G022730	771	2443.45	635.095	-1.9438	3.47e-242	2.26e-239	Down	NA	NA	NA	NA	NA	Stem-specific protein TSJT1-like	stem-specific protein TSJT1-like
Cla97C01G023030	363	17483.3	3828.74	-2.19116	0	0	Down	NA	NA	NA	NA	NA	Auxin-repressed 12.5 kDa	auxin-repressed 12.5 kDa protein-like
Cla97C01G023650	507	23.8317	7.65411	-1.64631	0.00214157	0.0112783	Down	NA	NA	NA	NA	NA	Olee1-like	olee1-like protein
Cla97C01G024970	207	10.238	0.635165	-4.00798	0.00137754	0.0077392	Down	NA	NA	NA	NA	NA	F-box LRR-repeat protein	F-box domain-containing protein
Cla97C02G026680	603	51.295	19.3021	-1.4109	3.66e-05	0.000321672	Down	NA	NA	NA	NA	NA	NAC transcription factor	NAC domain-containing protein
Cla97C02G026870	807	16.0591	1.5892	-3.3391	0.000106922	0.00083949	Down	NA	NA	NA	NA	NA	PDDEXK-like family of unknown function	Protein of unknown function (DUF506)
Cla97C02G027410	1614	21.0199	3.46928	-2.59805	0.000141254	0.00106752	Down	K01179 E3.2.1.4; endoglucanase [EC:3.2.1.4]	ko00500:Starch and sucrose metabolism	NA	NA	NA	Belongs to the glycosyl hydrolase 5 (cellulase A) family	Mannan endo-1,4-beta-mannosidase
Cla97C02G028020	1314	19.914	0.952747	-4.39235	1.05e-05	0.000105146	Down	NA	NA	NA	NA	NA	Belongs to the GRAS family	GRAS domain-containing protein
Cla97C02G028110	819	21.7159	8.87935	-1.29509	0.0123076	0.048514	Down	NA	NA	NA	GO:0001101;GO:0008150;GO:0009719;GO:0009725;GO:0009737;GO:0010033;GO:0033993;GO:0042221;GO:0050896;GO:0097305;GO:1901700;	GO:0005575;GO:0005618;GO:0005622;GO:0005623;GO:0005737;GO:0005773;GO:0030312;GO:0043226;GO:0043227;GO:0043229;GO:0043231;GO:0044424;GO:0044444;GO:0044464;GO:0071944;	cysteine-rich repeat secretory protein	cysteine-rich repeat secretory protein 38-like
Cla97C02G028550	1791	263.762	24.6554	-3.41619	6.82e-53	8.09e-51	Down	NA	NA	NA	NA	NA	NA	Lycopene beta/epsilon cyclase protein
Cla97C02G030370	753	3.54239	0	-4.33407	0.0125425	0.0492383	Down	NA	NA	NA	NA	GO:0005575;GO:0005618;GO:0005622;GO:0005623;GO:0005737;GO:0005794;GO:0005829;GO:0005911;GO:0009505;GO:0009506;GO:0012505;GO:0016020;GO:0030054;GO:0030312;GO:0043226;GO:0043227;GO:0043229;GO:0043231;GO:0044424;GO:0044444;GO:0044464;GO:0055044;GO:0071944;	Belongs to the expansin family	expansin-like A2
Cla97C02G030430	1560	568.592	277.047	-1.03695	7.13e-21	3.4e-19	Down	NA	NA	NA	NA	GO:0005575;GO:0005618;GO:0005622;GO:0005623;GO:0005737;GO:0005794;GO:0005829;GO:0005911;GO:0009505;GO:0009506;GO:0012505;GO:0016020;GO:0030054;GO:0030312;GO:0043226;GO:0043227;GO:0043229;GO:0043231;GO:0044424;GO:0044444;GO:0044464;GO:0055044;GO:0071944;	Belongs to the expansin family	Expansin-like A1
Cla97C02G030540	1068	19.1028	6.98019	-1.45431	0.00857015	0.0359682	Down	K22588 ASMT; acetylserotonin O-methyltransferase, plant [EC:2.1.1.4]	ko00380:Tryptophan metabolism	GO:0003674;GO:0003824;GO:0008168;GO:0008171;GO:0008757;GO:0016740;GO:0016741;GO:0017096;	GO:0006725;GO:0006807;GO:0008150;GO:0008152;GO:0009058;GO:0009987;GO:0010817;GO:0017144;GO:0018130;GO:0019438;GO:0030186;GO:0030187;GO:0032259;GO:0034641;GO:0034754;GO:0042430;GO:0042435;GO:0042445;GO:0042446;GO:0043603;GO:0043604;GO:0044237;GO:0044249;GO:0044271;GO:0046483;GO:0065007;GO:0065008;GO:0071704;GO:1901360;GO:1901362;GO:1901564;GO:1901566;GO:1901576;	GO:0005575;GO:0005622;GO:0005623;GO:0005737;GO:0044424;GO:0044464;	Belongs to the class I-like SAM-binding methyltransferase superfamily. Cation-independent O- methyltransferase family	O-methyltransferase family protein
Cla97C02G030550	1017	862.994	277.126	-1.63799	9.84e-65	1.45e-62	Down	K22588 ASMT; acetylserotonin O-methyltransferase, plant [EC:2.1.1.4]	ko00380:Tryptophan metabolism	GO:0003674;GO:0003824;GO:0008168;GO:0008171;GO:0008757;GO:0016740;GO:0016741;GO:0017096;	GO:0006725;GO:0006807;GO:0008150;GO:0008152;GO:0009058;GO:0009987;GO:0010817;GO:0017144;GO:0018130;GO:0019438;GO:0030186;GO:0030187;GO:0032259;GO:0034641;GO:0034754;GO:0042430;GO:0042435;GO:0042445;GO:0042446;GO:0043603;GO:0043604;GO:0044237;GO:0044249;GO:0044271;GO:0046483;GO:0065007;GO:0065008;GO:0071704;GO:1901360;GO:1901362;GO:1901564;GO:1901566;GO:1901576;	GO:0005575;GO:0005622;GO:0005623;GO:0005737;GO:0044424;GO:0044464;	Belongs to the class I-like SAM-binding methyltransferase superfamily. Cation-independent O- methyltransferase family	O-methyltransferase family protein
Cla97C02G031010	1413	262.998	63.716	-2.04318	3.17e-33	2.42e-31	Down	NA	NA	NA	NA	NA	Nodulin-like	protein NUCLEAR FUSION DEFECTIVE 4-like
Cla97C02G031180	1188	152.452	67.2173	-1.17902	3.21e-09	5.67e-08	Down	NA	NA	GO:0003674;GO:0003824;GO:0016740;GO:0016746;GO:0016747;GO:0090439;	GO:0006725;GO:0007275;GO:0008150;GO:0008152;GO:0009058;GO:0009555;GO:0009653;GO:0009987;GO:0010208;GO:0010584;GO:0010927;GO:0016043;GO:0019438;GO:0019748;GO:0022607;GO:0030198;GO:0030638;GO:0030639;GO:0032501;GO:0032502;GO:0032989;GO:0043062;GO:0044085;GO:0044237;GO:0044249;GO:0044550;GO:0045229;GO:0048229;GO:0048646;GO:0048856;GO:0048869;GO:0071704;GO:0071840;GO:0080110;GO:0085029;GO:1901576;	GO:0005575;GO:0005622;GO:0005623;GO:0005737;GO:0005783;GO:0012505;GO:0043226;GO:0043227;GO:0043229;GO:0043231;GO:0044424;GO:0044444;GO:0044464;	Belongs to the chalcone stilbene synthases family	Chalcone synthase
Cla97C02G031640	816	319.743	57.7962	-2.46865	8.57e-50	9.67e-48	Down	NA	NA	NA	NA	NA	B-box zinc finger protein 20-like	B-box zinc finger family protein
Cla97C02G031930	327	5.15246	0	-4.88499	0.00217541	0.0114267	Down	NA	NA	NA	NA	NA	NA	Unknown protein
Cla97C02G032620	249	886.572	311.072	-1.51044	4.72e-64	6.9e-62	Down	NA	NA	NA	NA	NA	NA	Unknown protein
Cla97C02G032900	1434	1035.14	431.278	-1.26452	7.69e-57	9.82e-55	Down	K09843 CYP707A; (+)-abscisic acid 8'-hydroxylase [EC:1.14.14.137]	ko00906:Carotenoid biosynthesis	GO:0003674;GO:0003824;GO:0004497;GO:0010295;GO:0016491;GO:0016705;GO:0016709;	GO:0006629;GO:0006694;GO:0007275;GO:0008150;GO:0008152;GO:0008202;GO:0008610;GO:0009058;GO:0010268;GO:0010817;GO:0016125;GO:0016128;GO:0016129;GO:0016131;GO:0016132;GO:0032501;GO:0032502;GO:0042445;GO:0042446;GO:0042592;GO:0044238;GO:0048856;GO:0048878;GO:0055088;GO:0055114;GO:0065007;GO:0065008;GO:0071704;GO:1901360;GO:1901362;GO:1901576;GO:1901615;GO:1901617;	NA	Belongs to the cytochrome P450 family	abscisic acid 8'-hydroxylase 4
Cla97C02G033210	2064	38.5716	16.2209	-1.2426	0.00325516	0.0160968	Down	NA	NA	NA	NA	NA	Encoded by	Proline-rich protein 36-like
Cla97C02G033360	348	12.3469	0.322031	-5.17485	0.000131086	0.00100269	Down	NA	NA	NA	NA	NA	NA	Unknown protein
Cla97C02G033390	633	59.0637	0.311552	-7.43625	1e-09	1.9e-08	Down	K13993 HSP20; HSP20 family protein	ko04141:Protein processing in endoplasmic reticulum	NA	GO:0006950;GO:0008150;GO:0009266;GO:0009408;GO:0009628;GO:0050896;	NA	Belongs to the small heat shock protein (HSP20) family	Heat-shock protein
Cla97C02G034050	489	11.1245	0.635165	-4.13335	0.000816887	0.00492818	Down	K13449 PR1; pathogenesis-related protein 1	ko04016:MAPK signaling pathway - plant|ko04075:Plant hormone signal transduction|ko04626:Plant-pathogen interaction	NA	NA	NA	Belongs to the CRISP family	Pathogenesis related protein-1
Cla97C02G034200	1320	1727.36	710.274	-1.2818	2.37e-69	3.92e-67	Down	NA	NA	NA	NA	NA	NA	Tunicamycin induced protein
Cla97C02G035120	525	22.297	2.5629	-3.13177	9.38e-06	9.46e-05	Down	NA	NA	NA	GO:0008150;GO:0009888;GO:0010087;GO:0010089;GO:0032502;GO:0048856;	GO:0005575;GO:0005622;GO:0005623;GO:0005634;GO:0005737;GO:0005829;GO:0043226;GO:0043227;GO:0043229;GO:0043231;GO:0044424;GO:0044444;GO:0044464;	NA	Vascular-related unknown protein 4
Cla97C02G035460	2241	79.9343	33.0285	-1.27538	1.98e-06	2.29e-05	Down	NA	NA	GO:0003674;GO:0003824;GO:0016740;GO:0016757;GO:0016758;GO:0016759;GO:0046527;	GO:0000271;GO:0000278;GO:0000281;GO:0000910;GO:0005975;GO:0005976;GO:0006073;GO:0007049;GO:0007275;GO:0008150;GO:0008152;GO:0009058;GO:0009059;GO:0009250;GO:0009653;GO:0009832;GO:0009833;GO:0009888;GO:0009987;GO:0010015;GO:0010053;GO:0010054;GO:0016049;GO:0016051;GO:0021700;GO:0022402;GO:0022622;GO:0030154;GO:0030243;GO:0030244;GO:0032501;GO:0032502;GO:0033692;GO:0034637;GO:0034645;GO:0040007;GO:…	GO:0005575;GO:0005622;GO:0005623;GO:0005737;GO:0005794;GO:0005886;GO:0012505;GO:0016020;GO:0043226;GO:0043227;GO:0043229;GO:0043231;GO:0044424;GO:0044444;GO:0044464;GO:0071944;	Belongs to the glycosyltransferase 2 family	cellulose synthase-like protein H1
Cla97C02G035940	405	11.5838	2.19895	-2.37645	0.00741933	0.0319946	Down	NA	NA	NA	NA	NA	NA	Unknown protein
Cla97C02G035990	282	14.9343	4.45031	-1.74011	0.00941648	0.0388873	Down	NA	NA	NA	NA	NA	NA	Unknown protein
Cla97C02G036050	1035	365.115	180.515	-1.01789	1.12e-16	4.13e-15	Down	K09510 DNAJB4; DnaJ homolog subfamily B member 4	NA	NA	GO:0000226;GO:0001578;GO:0006996;GO:0007010;GO:0007017;GO:0008150;GO:0009987;GO:0016043;GO:0022607;GO:0030030;GO:0030031;GO:0035082;GO:0044085;GO:0044782;GO:0060271;GO:0070925;GO:0071840;GO:0120031;GO:0120036;GO:1904158;	GO:0005575;GO:0005622;GO:0005623;GO:0005737;GO:0005856;GO:0005929;GO:0005930;GO:0031514;GO:0032838;GO:0036126;GO:0042995;GO:0043226;GO:0043228;GO:0043229;GO:0043232;GO:0044422;GO:0044424;GO:0044430;GO:0044441;GO:0044444;GO:0044446;GO:0044463;GO:0044464;GO:0097014;GO:0097223;GO:0097224;GO:0097729;GO:0099568;GO:0120025;GO:0120038;	DnaJ homolog subfamily B member	dnaJ homolog subfamily B member 13-like
Cla97C02G036600	1794	149.277	73.7476	-1.01467	9.94e-08	1.44e-06	Down	K00021 HMGCR; hydroxymethylglutaryl-CoA reductase (NADPH) [EC:1.1.1.34]	ko00900:Terpenoid backbone biosynthesis	GO:0003674;GO:0003824;GO:0004420;GO:0016491;GO:0016614;GO:0016616;GO:0042282;	GO:0006629;GO:0006694;GO:0006720;GO:0006721;GO:0006722;GO:0008150;GO:0008152;GO:0008202;GO:0008299;GO:0008610;GO:0009058;GO:0009987;GO:0016104;GO:0016114;GO:0016125;GO:0016126;GO:0044237;GO:0044238;GO:0044249;GO:0044255;GO:0055114;GO:0071704;GO:1901360;GO:1901362;GO:1901576;GO:1901615;GO:1901617;	GO:0005575;GO:0005622;GO:0005623;GO:0005737;GO:0005739;GO:0005740;GO:0005777;GO:0005778;GO:0005783;GO:0005789;GO:0009526;GO:0009536;GO:0012505;GO:0016020;GO:0031090;GO:0031903;GO:0031966;GO:0031967;GO:0031975;GO:0031984;GO:0042170;GO:0042175;GO:0042579;GO:0043226;GO:0043227;GO:0043229;GO:0043231;GO:0044422;GO:0044424;GO:0044425;GO:0044429;GO:0044432;GO:0044435;GO:0044438;GO:0044439;GO:0044444;GO:…	A reductase	3-hydroxy-3-methylglutaryl coenzyme A reductase
Cla97C02G037220	1695	106.081	38.7297	-1.45387	7.8e-10	1.51e-08	Down	NA	NA	NA	NA	NA	Proline-rich protein	proline-rich protein 4
Cla97C02G037320	450	531.991	140.195	-1.92143	3.63e-52	4.21e-50	Down	NA	NA	NA	NA	GO:0005575;GO:0005622;GO:0005623;GO:0005634;GO:0005737;GO:0009507;GO:0009536;GO:0043226;GO:0043227;GO:0043229;GO:0043231;GO:0044424;GO:0044444;GO:0044464;	Chaperone protein DNAj	Chaperone protein dnaJ 11
Cla97C02G037780	360	24.3322	6.31072	-1.93828	0.000397855	0.0026297	Down	NA	NA	NA	NA	NA	NA	zinc-regulated protein 8-like
Cla97C02G038560	1851	15.2069	3.16347	-2.2574	0.00191414	0.0102817	Down	NA	NA	GO:0003674;GO:0003824;GO:0004672;GO:0004674;GO:0004675;GO:0004888;GO:0016301;GO:0016740;GO:0016772;GO:0016773;GO:0019199;GO:0038023;GO:0060089;GO:0140096;	GO:0002237;GO:0002831;GO:0002833;GO:0006464;GO:0006468;GO:0006486;GO:0006793;GO:0006796;GO:0006807;GO:0007154;GO:0007165;GO:0007166;GO:0007167;GO:0007178;GO:0008150;GO:0008152;GO:0009058;GO:0009059;GO:0009100;GO:0009101;GO:0009605;GO:0009607;GO:0009617;GO:0009877;GO:0009987;GO:0010033;GO:0016310;GO:0019538;GO:0023052;GO:0031347;GO:0031349;GO:0032101;GO:0032103;GO:0034645;GO:0036211;GO:0042221;GO:…	GO:0005575;GO:0005622;GO:0005623;GO:0005737;GO:0005773;GO:0005775;GO:0005886;GO:0016020;GO:0031974;GO:0043226;GO:0043227;GO:0043229;GO:0043231;GO:0043233;GO:0044422;GO:0044424;GO:0044437;GO:0044444;GO:0044446;GO:0044464;GO:0070013;GO:0071944;	LYK5-like	Protein kinase domain-containing protein
Cla97C02G039800	429	2077.84	495.081	-2.06951	5.61e-191	2.69e-188	Down	K12859 TXNL4A, DIB1; U5 snRNP protein, DIM1 family	ko03040:Spliceosome	NA	NA	NA	Thioredoxin-like protein	Thioredoxin-like protein YLS8
Cla97C02G039810	1398	181.842	85.6686	-1.08335	7.05e-09	1.18e-07	Down	NA	NA	NA	NA	GO:0005575;GO:0005622;GO:0005623;GO:0005737;GO:0009507;GO:0009536;GO:0043226;GO:0043227;GO:0043229;GO:0043231;GO:0044424;GO:0044444;GO:0044464;	4Fe-4S single cluster domain of Ferredoxin I	J domain-containing protein
Cla97C02G039840	1530	16.2494	2.24087	-2.86995	0.000427701	0.00279313	Down	K24193 STP; MFS transporter, SP family, sugar:H+ symporter	NA	GO:0003674;GO:0005215;GO:0005351;GO:0005354;GO:0005355;GO:0005356;GO:0005402;GO:0008324;GO:0009679;GO:0015075;GO:0015077;GO:0015078;GO:0015144;GO:0015145;GO:0015149;GO:0015291;GO:0015293;GO:0015294;GO:0015295;GO:0015318;GO:0015578;GO:0022804;GO:0022857;GO:0022890;GO:0051119;GO:0055055;GO:0055056;	GO:0001678;GO:0006810;GO:0006811;GO:0006812;GO:0008150;GO:0008643;GO:0008645;GO:0009743;GO:0009746;GO:0009749;GO:0009987;GO:0010033;GO:0015672;GO:0015749;GO:0015757;GO:0015761;GO:0019725;GO:0033500;GO:0034219;GO:0034220;GO:0034284;GO:0042221;GO:0042592;GO:0042593;GO:0046323;GO:0048878;GO:0050896;GO:0051179;GO:0051234;GO:0051716;GO:0055082;GO:0055085;GO:0065007;GO:0065008;GO:0070887;GO:0071310;GO:…	GO:0005575;GO:0005623;GO:0005886;GO:0016020;GO:0044464;GO:0071944;	Belongs to the major facilitator superfamily. Sugar transporter (TC 2.A.1.1) family	Sugar transport protein 10-like
Cla97C02G039850	1542	17.6692	2.22436	-2.99436	8.49e-05	0.000685883	Down	K24193 STP; MFS transporter, SP family, sugar:H+ symporter	NA	GO:0003674;GO:0005215;GO:0005351;GO:0005354;GO:0005355;GO:0005356;GO:0005402;GO:0008324;GO:0009679;GO:0015075;GO:0015077;GO:0015078;GO:0015144;GO:0015145;GO:0015149;GO:0015291;GO:0015293;GO:0015294;GO:0015295;GO:0015318;GO:0015578;GO:0022804;GO:0022857;GO:0022890;GO:0051119;GO:0055055;GO:0055056;	GO:0001678;GO:0006810;GO:0006811;GO:0006812;GO:0008150;GO:0008643;GO:0008645;GO:0009743;GO:0009746;GO:0009749;GO:0009987;GO:0010033;GO:0015672;GO:0015749;GO:0015757;GO:0015761;GO:0019725;GO:0033500;GO:0034219;GO:0034220;GO:0034284;GO:0042221;GO:0042592;GO:0042593;GO:0046323;GO:0048878;GO:0050896;GO:0051179;GO:0051234;GO:0051716;GO:0055082;GO:0055085;GO:0065007;GO:0065008;GO:0070887;GO:0071310;GO:…	GO:0005575;GO:0005623;GO:0005886;GO:0016020;GO:0044464;GO:0071944;	Belongs to the major facilitator superfamily. Sugar transporter (TC 2.A.1.1) family	Sugar transport protein 10-like
Cla97C02G040500	252	121.324	52.5237	-1.20866	2.73e-08	4.24e-07	Down	NA	NA	NA	NA	NA	NA	LOW QUALITY PROTEIN: uncharacterized protein LOC111023284
Cla97C02G040920	528	336.536	139.213	-1.27179	6.85e-22	3.43e-20	Down	NA	NA	NA	NA	GO:0005575;GO:0005622;GO:0005623;GO:0005737;GO:0030016;GO:0030017;GO:0030018;GO:0031674;GO:0043226;GO:0043228;GO:0043229;GO:0043232;GO:0043292;GO:0044422;GO:0044424;GO:0044444;GO:0044449;GO:0044464;GO:0099080;GO:0099081;GO:0099512;	DnaJ homolog subfamily B member	dnaJ homolog subfamily B member 8
Cla97C02G041820	3681	570.373	0	-11.6707	5.58e-23	2.97e-21	Down	NA	NA	NA	NA	NA	TMV resistance protein N-like	TIR-NBS-LRR disease resistance protein
Cla97C02G043610	579	65.1248	22.2185	-1.55012	5.09e-07	6.57e-06	Down	NA	NA	NA	GO:0006139;GO:0006351;GO:0006725;GO:0006807;GO:0008150;GO:0008152;GO:0009058;GO:0009059;GO:0009299;GO:0009314;GO:0009416;GO:0009628;GO:0009653;GO:0009987;GO:0010467;GO:0016070;GO:0016071;GO:0018130;GO:0019438;GO:0032502;GO:0032774;GO:0034641;GO:0034645;GO:0034654;GO:0043170;GO:0044237;GO:0044238;GO:0044249;GO:0044260;GO:0044271;GO:0046483;GO:0048856;GO:0050896;GO:0071704;GO:0090304;GO:0090698;GO:…	GO:0005575;GO:0005622;GO:0005623;GO:0005634;GO:0043226;GO:0043227;GO:0043229;GO:0043231;GO:0044424;GO:0044464;	Protein LIGHT-DEPENDENT SHORT HYPOCOTYLS	Protein LIGHT-DEPENDENT SHORT HYPOCOTYLS 10-like
Cla97C02G044480	423	68.7478	32.6813	-1.0726	0.00012435	0.000957697	Down	K14488 SAUR; SAUR family protein	ko04075:Plant hormone signal transduction	NA	GO:0003002;GO:0006810;GO:0007275;GO:0007389;GO:0008150;GO:0009605;GO:0009606;GO:0009628;GO:0009629;GO:0009630;GO:0009914;GO:0009956;GO:0009958;GO:0010817;GO:0022622;GO:0032501;GO:0032502;GO:0048364;GO:0048731;GO:0048856;GO:0050896;GO:0051179;GO:0051234;GO:0060918;GO:0065007;GO:0065008;GO:0090057;GO:0099402;	GO:0005575;GO:0005622;GO:0005623;GO:0005737;GO:0044424;GO:0044464;	Auxin-induced protein	auxin-responsive protein SAUR71
Cla97C02G044490	207	19.0891	5.72795	-1.74097	0.00342107	0.016786	Down	NA	NA	NA	NA	NA	NA	Unknown protein
Cla97C02G045450	1764	169.732	11.7512	-3.85292	8.2e-38	7.35e-36	Down	K01953 asnB, ASNS; asparagine synthase (glutamine-hydrolysing) [EC:6.3.5.4]	ko00250:Alanine, aspartate and glutamate metabolism	NA	NA	NA	Asparagine synthetase	Asparagine synthetase [glutamine-hydrolyzing]
Cla97C02G045590	900	63.9078	15.5334	-2.04181	1.03e-09	1.94e-08	Down	K11778 DHDDS, RER2, SRT1; ditrans,polycis-polyprenyl diphosphate synthase [EC:2.5.1.87]	ko00900:Terpenoid backbone biosynthesis	GO:0002094;GO:0003674;GO:0003824;GO:0004659;GO:0016740;GO:0016765;	GO:0006066;GO:0006629;GO:0006720;GO:0006996;GO:0008150;GO:0008152;GO:0008299;GO:0008610;GO:0009058;GO:0009657;GO:0009668;GO:0009987;GO:0016043;GO:0016093;GO:0016094;GO:0044237;GO:0044238;GO:0044249;GO:0044255;GO:0044281;GO:0044283;GO:0046165;GO:0061024;GO:0071704;GO:0071840;GO:1901576;GO:1901615;GO:1901617;	GO:0005575;GO:0005622;GO:0005623;GO:0005737;GO:0005829;GO:0009507;GO:0009532;GO:0009536;GO:0009570;GO:0043226;GO:0043227;GO:0043229;GO:0043231;GO:0044422;GO:0044424;GO:0044434;GO:0044435;GO:0044444;GO:0044446;GO:0044464;	Belongs to the UPP synthase family	Alkyl transferase
Cla97C02G045670	1707	107.553	52.0368	-1.04841	2.06e-06	2.37e-05	Down	NA	NA	NA	NA	NA	Tetratricopeptide repeat (TPR)-like superfamily protein	TPR_REGION domain-containing protein
Cla97C02G046470	558	146.467	71.8431	-1.02816	2.58e-07	3.49e-06	Down	NA	NA	GO:0003674;GO:0003700;GO:0140110;	GO:0000003;GO:0003002;GO:0003006;GO:0006355;GO:0007275;GO:0007389;GO:0008150;GO:0008283;GO:0009791;GO:0009798;GO:0009889;GO:0009908;GO:0009943;GO:0009947;GO:0009955;GO:0010468;GO:0010556;GO:0010865;GO:0019219;GO:0019222;GO:0022414;GO:0031323;GO:0031326;GO:0032501;GO:0032502;GO:0048366;GO:0048367;GO:0048608;GO:0048731;GO:0048827;GO:0048856;GO:0050789;GO:0050794;GO:0051171;GO:0051252;GO:0060255;GO:…	GO:0005575;GO:0005622;GO:0005623;GO:0005634;GO:0043226;GO:0043227;GO:0043229;GO:0043231;GO:0044424;GO:0044464;	WUSCHEL-related homeobox	WUSCHEL-related homeobox 3
Cla97C02G047210	510	80.5138	15.8687	-2.34384	6.17e-14	1.82e-12	Down	NA	NA	NA	NA	NA	Senescence regulator	Protein of unknown function, DUF584
Cla97C02G048210	1533	161.58	65.2655	-1.30756	1.03e-11	2.48e-10	Down	K14431 TGA; transcription factor TGA	ko04075:Plant hormone signal transduction	NA	NA	NA	transcription factor	bZIP transcription factor family protein
Cla97C02G049690	2784	1006.44	243.741	-2.04564	9.88e-117	2.66e-114	Down	K00454 LOX2S; lipoxygenase [EC:1.13.11.12]	ko00591:Linoleic acid metabolism|ko00592:alpha-Linolenic acid metabolism	NA	NA	NA	Plant lipoxygenase may be involved in a number of diverse aspects of plant physiology including growth and development, pest resistance, and senescence or responses to wounding	Lipoxygenase
Cla97C02G049890	1023	248.91	114.954	-1.11471	7.17e-13	1.92e-11	Down	K00430 E1.11.1.7; peroxidase [EC:1.11.1.7]	ko00940:Phenylpropanoid biosynthesis	NA	NA	GO:0005575;GO:0005622;GO:0005623;GO:0005737;GO:0005773;GO:0005774;GO:0016020;GO:0031090;GO:0043226;GO:0043227;GO:0043229;GO:0043231;GO:0044422;GO:0044424;GO:0044437;GO:0044444;GO:0044446;GO:0044464;GO:0098588;GO:0098805;	Removal of H(2)O(2), oxidation of toxic reductants, biosynthesis and degradation of lignin, suberization, auxin catabolism, response to environmental stresses such as wounding, pathogen attack and oxidative stress	Peroxidase
Cla97C02G050740	1659	15.0615	2.23326	-2.76562	0.000713414	0.00438252	Down	K00423 E1.10.3.3; L-ascorbate oxidase [EC:1.10.3.3]	ko00053:Ascorbate and aldarate metabolism	NA	NA	NA	L-ascorbate oxidase homolog	L-ascorbate oxidase-like protein
Cla97C02G050750	1659	17.9967	4.13114	-2.12792	0.000988232	0.00581619	Down	K00423 E1.10.3.3; L-ascorbate oxidase [EC:1.10.3.3]	ko00053:Ascorbate and aldarate metabolism	NA	NA	NA	L-ascorbate oxidase homolog	L-ascorbate oxidase-like protein
Cla97C02G050760	1656	12.2493	0	-6.13664	1.08e-05	0.000107062	Down	K00423 E1.10.3.3; L-ascorbate oxidase [EC:1.10.3.3]	ko00053:Ascorbate and aldarate metabolism	NA	NA	NA	L-ascorbate oxidase homolog	L-ascorbate oxidase-like protein
Cla97C02G050770	1662	6.55154	0.317582	-4.26859	0.00481099	0.0222894	Down	K00423 E1.10.3.3; L-ascorbate oxidase [EC:1.10.3.3]	ko00053:Ascorbate and aldarate metabolism	NA	NA	NA	L-ascorbate oxidase homolog	L-ascorbate oxidase homolog
Cla97C03G051000	1581	27.5045	11.9831	-1.19537	0.010093	0.0411592	Down	NA	NA	NA	NA	NA	Nodulin-like	protein NUCLEAR FUSION DEFECTIVE 4
Cla97C03G051410	1455	106.334	28.4689	-1.89779	5.83e-13	1.57e-11	Down	NA	NA	GO:0003674;GO:0003824;GO:0004672;GO:0004674;GO:0004709;GO:0016301;GO:0016740;GO:0016772;GO:0016773;GO:0140096;	GO:0000003;GO:0000165;GO:0000186;GO:0000746;GO:0000747;GO:0000749;GO:0000750;GO:0001932;GO:0001934;GO:0006464;GO:0006468;GO:0006793;GO:0006796;GO:0006807;GO:0006950;GO:0007154;GO:0007165;GO:0007186;GO:0008150;GO:0008152;GO:0009893;GO:0009966;GO:0009967;GO:0009987;GO:0010033;GO:0010514;GO:0010562;GO:0010564;GO:0010604;GO:0010646;GO:0010647;GO:0010941;GO:0016310;GO:0019220;GO:0019222;GO:0019236;GO:…	GO:0000935;GO:0005575;GO:0005622;GO:0005623;GO:0005737;GO:0005886;GO:0016020;GO:0030428;GO:0032153;GO:0032155;GO:0044424;GO:0044464;GO:0051286;GO:0071944;	Belongs to the protein kinase superfamily	mitogen-activated protein kinase kinase kinase NPK1
Cla97C03G051750	1818	30.208	7.95073	-1.92516	0.00011175	0.000873998	Down	K05349 bglX; beta-glucosidase [EC:3.2.1.21]	ko00460:Cyanoamino acid metabolism|ko00500:Starch and sucrose metabolism|ko00999:Biosynthesis of various plant secondary metabolites	GO:0003674;GO:0003824;GO:0004553;GO:0008422;GO:0015926;GO:0016787;GO:0016798;	GO:0000272;GO:0005975;GO:0005976;GO:0008150;GO:0008152;GO:0009056;GO:0009057;GO:0009251;GO:0016052;GO:0043170;GO:0044042;GO:0044238;GO:0071704;GO:1901575;	GO:0000323;GO:0005575;GO:0005622;GO:0005623;GO:0005737;GO:0005764;GO:0005773;GO:0005886;GO:0016020;GO:0043226;GO:0043227;GO:0043229;GO:0043231;GO:0044424;GO:0044444;GO:0044464;GO:0071944;	Belongs to the glycosyl hydrolase 3 family	Beta-glucosidase
Cla97C03G051790	1074	4591.13	2175.88	-1.07741	3.63e-90	7.26e-88	Down	NA	NA	GO:0003674;GO:0003676;GO:0003723;GO:0005488;GO:0097159;GO:1901363;	GO:0006139;GO:0006325;GO:0006396;GO:0006464;GO:0006473;GO:0006475;GO:0006725;GO:0006807;GO:0006996;GO:0008150;GO:0008152;GO:0008380;GO:0009314;GO:0009416;GO:0009628;GO:0009642;GO:0009644;GO:0009987;GO:0010467;GO:0010468;GO:0016043;GO:0016070;GO:0016569;GO:0016570;GO:0016573;GO:0018193;GO:0018205;GO:0018393;GO:0018394;GO:0019219;GO:0019222;GO:0019538;GO:0031323;GO:0034641;GO:0036211;GO:0043170;GO:…	NA	RNA recognition motif. (a.k.a. RRM, RBD, or RNP domain)	serine/arginine-rich splicing factor SR45a-like
Cla97C03G051930	483	9775.39	333.374	-4.87353	0	0	Down	K13993 HSP20; HSP20 family protein	ko04141:Protein processing in endoplasmic reticulum	NA	NA	GO:0005575;GO:0005622;GO:0005623;GO:0005737;GO:0044424;GO:0044464;	Belongs to the small heat shock protein (HSP20) family	Class I heat shock protein
Cla97C03G051940	447	941.379	442.303	-1.09015	8.4e-31	5.91e-29	Down	K13993 HSP20; HSP20 family protein	ko04141:Protein processing in endoplasmic reticulum	NA	NA	NA	Belongs to the small heat shock protein (HSP20) family	17.5 kDa class I heat shock protein-like
Cla97C03G051970	933	174.824	86.906	-1.0106	8.41e-09	1.4e-07	Down	NA	NA	GO:0003674;GO:0003824;GO:0008194;GO:0016740;GO:0016757;GO:0016758;GO:0035251;GO:0046527;GO:0047254;GO:0080043;GO:0080044;	NA	GO:0005575;GO:0005622;GO:0005623;GO:0043226;GO:0043227;GO:0043229;GO:0043231;GO:0044424;GO:0044464;	UDP-glycosyltransferase 76E2-like	Glycosyltransferase
Cla97C03G052030	549	274.012	125.32	-1.12978	1.81e-14	5.66e-13	Down	NA	NA	NA	NA	NA	NA	Encodes a protein involved in salt tolerance, names SIS (Salt Induced Serine rich).
Cla97C03G052870	801	104.099	8.23084	-3.66057	5.74e-24	3.21e-22	Down	K09422 MYBP; transcription factor MYB, plant	NA	GO:0000981;GO:0001067;GO:0001134;GO:0001135;GO:0003674;GO:0003676;GO:0003677;GO:0003700;GO:0005488;GO:0043565;GO:0044212;GO:0097159;GO:0140110;GO:1901363;GO:0005515;GO:0008134;	GO:0000003;GO:0001101;GO:0003006;GO:0006082;GO:0006355;GO:0006357;GO:0006629;GO:0006720;GO:0006721;GO:0006950;GO:0007154;GO:0007165;GO:0007275;GO:0008150;GO:0008152;GO:0008299;GO:0008610;GO:0009058;GO:0009267;GO:0009605;GO:0009653;GO:0009685;GO:0009686;GO:0009719;GO:0009725;GO:0009739;GO:0009740;GO:0009751;GO:0009753;GO:0009755;GO:0009791;GO:0009867;GO:0009889;GO:0009890;GO:0009892;GO:0009908;GO:…	GO:0005575;GO:0005622;GO:0005623;GO:0005634;GO:0043226;GO:0043227;GO:0043229;GO:0043231;GO:0044424;GO:0044464;	Transcription factor	transcription factor MYB62-like
Cla97C03G054010	858	3.89041	0	-4.47039	0.0100653	0.0410712	Down	NA	NA	NA	NA	NA	NA	Proline-rich protein HaeIII subfamily 1-like
Cla97C03G054640	216	34.4126	7.90436	-2.11683	8.8e-06	8.91e-05	Down	NA	NA	NA	NA	NA	NA	Unknown protein
Cla97C03G054890	1053	51.7283	23.7883	-1.11636	0.000600082	0.00377831	Down	NA	NA	NA	NA	GO:0005575;GO:0005622;GO:0005623;GO:0005634;GO:0043226;GO:0043227;GO:0043229;GO:0043231;GO:0044424;GO:0044464;	f-box protein	F-box protein
Cla97C03G055130	900	172.466	30.1302	-2.51739	2.07e-29	1.41e-27	Down	K15382 SLC50A, SWEET; solute carrier family 50 (sugar transporter)	NA	GO:0003674;GO:0005215;GO:0008515;GO:0015144;GO:0015154;GO:0015157;GO:0022857;GO:0051119;	GO:0000003;GO:0003006;GO:0006810;GO:0007275;GO:0008150;GO:0008643;GO:0009790;GO:0009791;GO:0009793;GO:0009987;GO:0010154;GO:0010431;GO:0015766;GO:0015770;GO:0015772;GO:0016043;GO:0021700;GO:0022414;GO:0022607;GO:0032501;GO:0032502;GO:0032504;GO:0034219;GO:0043933;GO:0044085;GO:0048316;GO:0048608;GO:0048609;GO:0048731;GO:0048856;GO:0051179;GO:0051234;GO:0051259;GO:0051260;GO:0055085;GO:0061458;GO:…	GO:0005575;GO:0005623;GO:0005886;GO:0005887;GO:0016020;GO:0016021;GO:0031224;GO:0031226;GO:0044425;GO:0044459;GO:0044464;GO:0071944;	Mediates both low-affinity uptake and efflux of sugar across the membrane	Bidirectional sugar transporter SWEET
Cla97C03G055510	954	25.2035	9.52213	-1.40929	0.00306957	0.0153296	Down	K18368 CSE; caffeoylshikimate esterase [EC:3.1.1.-]	ko00940:Phenylpropanoid biosynthesis	NA	NA	NA	Caffeoylshikimate esterase-like	alpha/beta-Hydrolases superfamily protein
Cla97C03G055530	465	58.2329	26.6209	-1.13589	0.000423303	0.00276889	Down	NA	NA	NA	NA	NA	Stigma-specific protein, Stig1	stigma-specific STIG1-like protein 1
Cla97C03G056450	1725	6.59956	0	-5.23843	0.000545387	0.00346905	Down	K14175 NES1; (3S,6E)-nerolidol synthase [EC:4.2.3.48]	ko00909:Sesquiterpenoid and triterpenoid biosynthesis	GO:0000287;GO:0003674;GO:0003824;GO:0005488;GO:0010333;GO:0010334;GO:0016829;GO:0016835;GO:0016838;GO:0034007;GO:0043167;GO:0043169;GO:0046872;GO:0080013;	GO:0006629;GO:0006720;GO:0006721;GO:0006950;GO:0006952;GO:0008150;GO:0008152;GO:0008299;GO:0008610;GO:0009058;GO:0009605;GO:0009607;GO:0009611;GO:0009617;GO:0009987;GO:0016101;GO:0016102;GO:0016114;GO:0031347;GO:0042214;GO:0042742;GO:0043207;GO:0043692;GO:0043693;GO:0044237;GO:0044238;GO:0044249;GO:0044255;GO:0046246;GO:0048583;GO:0050789;GO:0050896;GO:0051704;GO:0051707;GO:0051761;GO:0051762;GO:…	GO:0005575;GO:0005622;GO:0005623;GO:0005737;GO:0009507;GO:0009536;GO:0043226;GO:0043227;GO:0043229;GO:0043231;GO:0044424;GO:0044444;GO:0044464;	(3S,6E)-nerolidol synthase	(3S,6E)-nerolidol synthase 1-like
Cla97C03G058120	1011	44.5735	19.5943	-1.18386	0.00117834	0.0067747	Down	K04125 GA2ox; gibberellin 2beta-dioxygenase [EC:1.14.11.13]	ko00904:Diterpenoid biosynthesis	GO:0003674;GO:0003824;GO:0016491;GO:0016705;GO:0016706;GO:0045543;GO:0051213;GO:0052634;	GO:0006082;GO:0006629;GO:0006720;GO:0006721;GO:0008150;GO:0008152;GO:0008299;GO:0008300;GO:0008610;GO:0009056;GO:0009058;GO:0009314;GO:0009416;GO:0009628;GO:0009639;GO:0009685;GO:0009686;GO:0009987;GO:0010114;GO:0010817;GO:0016042;GO:0016053;GO:0016054;GO:0016101;GO:0016102;GO:0016103;GO:0016114;GO:0016115;GO:0019752;GO:0042445;GO:0042446;GO:0042447;GO:0043436;GO:0044237;GO:0044238;GO:0044242;GO:…	NA	Belongs to the iron ascorbate-dependent oxidoreductase family	Gibberellin 2-beta-dioxygenase-like
Cla97C03G058180	1185	117.51	48.2616	-1.28543	1.39e-07	1.97e-06	Down	NA	NA	GO:0003674;GO:0005215;GO:0005345;GO:0015205;GO:0022857;	GO:0006810;GO:0006863;GO:0008150;GO:0009605;GO:0009607;GO:0009624;GO:0015851;GO:0043207;GO:0050896;GO:0051179;GO:0051234;GO:0051704;GO:0051707;GO:0055085;GO:0071702;GO:0071705;GO:0072530;GO:1904823;	GO:0005575;GO:0016020;	purine permease	purine permease 10
Cla97C03G059320	603	51.6308	23.4193	-1.13877	0.000571795	0.00361724	Down	K09286 EREBP; EREBP-like factor	NA	NA	NA	NA	ethylene-responsive transcription factor	ethylene-responsive transcription factor 8
Cla97C03G059720	1626	972.601	75.0598	-3.69446	1.03e-166	4.32e-164	Down	NA	NA	NA	NA	NA	Belongs to the oxygen-dependent FAD-linked oxidoreductase family	berberine bridge enzyme-like 18
Cla97C03G060130	447	71.6698	24.3562	-1.55408	5.38e-07	6.94e-06	Down	NA	NA	GO:0003674;GO:0005488;GO:0043167;GO:0043169;GO:0046872;GO:0046914;	GO:0006810;GO:0006811;GO:0006812;GO:0006873;GO:0006875;GO:0008150;GO:0009987;GO:0019725;GO:0030001;GO:0030003;GO:0042592;GO:0046916;GO:0048878;GO:0050801;GO:0051179;GO:0051234;GO:0055065;GO:0055076;GO:0055080;GO:0055082;GO:0065007;GO:0065008;GO:0098771;	GO:0005575;GO:0005622;GO:0005623;GO:0005737;GO:0044424;GO:0044464;	Heavy metal-associated isoprenylated plant protein	heavy metal-associated isoprenylated plant protein 24
Cla97C03G060150	2028	107.442	53.1474	-1.01633	1.27e-05	0.000125053	Down	K17469 SULTR2; sulfate transporter 2, low-affinity	NA	GO:0003674;GO:0005215;GO:0008509;GO:0015075;GO:0015103;GO:0015116;GO:0015318;GO:0022857;GO:1901682;	GO:0006810;GO:0006811;GO:0006820;GO:0008150;GO:0008272;GO:0015698;GO:0034220;GO:0051179;GO:0051234;GO:0055085;GO:0072348;GO:0098656;GO:0098660;GO:0098661;GO:1902358;	GO:0005575;GO:0005623;GO:0005886;GO:0005887;GO:0016020;GO:0016021;GO:0031224;GO:0031226;GO:0044425;GO:0044459;GO:0044464;GO:0071944;	low affinity sulfate transporter	low affinity sulfate transporter 3
Cla97C03G060820	951	175.327	45.9256	-1.9348	2.88e-21	1.39e-19	Down	K09287 RAV; RAV-like factor	NA	GO:0001067;GO:0003674;GO:0003676;GO:0003677;GO:0003700;GO:0005488;GO:0043565;GO:0044212;GO:0097159;GO:0140110;GO:1901363;	GO:0000003;GO:0003006;GO:0006355;GO:0007275;GO:0008150;GO:0009314;GO:0009416;GO:0009628;GO:0009648;GO:0009719;GO:0009725;GO:0009741;GO:0009791;GO:0009889;GO:0009890;GO:0009892;GO:0009909;GO:0009910;GO:0010033;GO:0010228;GO:0010468;GO:0010556;GO:0010558;GO:0010605;GO:0010629;GO:0014070;GO:0019219;GO:0019222;GO:0022414;GO:0022622;GO:0031323;GO:0031324;GO:0031326;GO:0031327;GO:0032501;GO:0032502;GO:…	GO:0005575;GO:0005622;GO:0005623;GO:0005634;GO:0043226;GO:0043227;GO:0043229;GO:0043231;GO:0044424;GO:0044464;	AP2 ERF and B3 domain-containing transcription	AP2/ERF and B3 domain-containing transcription factor RAV1-like
Cla97C03G061610	1038	72.5082	28.5067	-1.34584	1.47e-06	1.74e-05	Down	NA	NA	NA	NA	NA	NA	Unknown protein
Cla97C03G061920	603	2268.32	1126.45	-1.00978	6.08e-81	1.12e-78	Down	NA	NA	NA	NA	NA	Activator of Hsp90 ATPase, N-terminal	Aha1_N domain-containing protein
Cla97C03G062000	2703	14.4818	0	-6.37466	1.78e-06	2.08e-05	Down	NA	NA	NA	NA	NA	beta-galactosidase	Beta-galactosidase
Cla97C03G062120	1251	14468.8	4763.09	-1.60289	0	0	Down	K09503 DNAJA2; DnaJ homolog subfamily A member 2	ko04141:Protein processing in endoplasmic reticulum	NA	NA	NA	DnaJ protein homolog	DnaJ
Cla97C03G062800	828	230.422	96.2653	-1.25873	1.4e-15	4.69e-14	Down	K09419 HSFF; heat shock transcription factor, other eukaryote	NA	GO:0003674;GO:0003700;GO:0140110;	GO:0006355;GO:0008150;GO:0008356;GO:0009889;GO:0009987;GO:0010468;GO:0010556;GO:0019219;GO:0019222;GO:0031323;GO:0031326;GO:0050789;GO:0050794;GO:0051171;GO:0051252;GO:0051301;GO:0060255;GO:0065007;GO:0080090;GO:1903506;GO:2000112;GO:2001141;GO:0008152;GO:0006139;GO:0006351;GO:0006725;GO:0006807;GO:0009058;GO:0009059;GO:0010467;GO:0016070;GO:0018130;GO:0019438;GO:0032774;GO:0034641;GO:0034645;GO:…	NA	Heat stress transcription factor	Heat stress transcription factor B-4b-like
Cla97C03G065350	705	2037.57	760.648	-1.42122	2.32e-128	6.79e-126	Down	NA	NA	NA	GO:0006950;GO:0008150;GO:0009266;GO:0009409;GO:0009628;GO:0009719;GO:0009725;GO:0009735;GO:0010033;GO:0042221;GO:0050896;	GO:0005575;GO:0005576;GO:0005618;GO:0005622;GO:0005623;GO:0005634;GO:0009505;GO:0030312;GO:0031012;GO:0043226;GO:0043227;GO:0043229;GO:0043231;GO:0044421;GO:0044424;GO:0044464;GO:0048046;GO:0071944;	Auxin-binding protein	Germin-like protein
Cla97C03G065500	534	101.815	46.6449	-1.13184	3.6e-06	3.96e-05	Down	NA	NA	GO:0003674;GO:0003824;GO:0004842;GO:0016740;GO:0019787;GO:0061630;GO:0061659;GO:0140096;	GO:0006464;GO:0006508;GO:0006511;GO:0006807;GO:0008150;GO:0008152;GO:0009056;GO:0009057;GO:0009987;GO:0010498;GO:0016567;GO:0019538;GO:0019941;GO:0030163;GO:0032446;GO:0036211;GO:0043161;GO:0043170;GO:0043412;GO:0043632;GO:0044237;GO:0044238;GO:0044248;GO:0044257;GO:0044260;GO:0044265;GO:0044267;GO:0051603;GO:0070647;GO:0071704;GO:1901564;GO:1901565;GO:1901575;	NA	RING-H2 finger protein	RING-type E3 ubiquitin transferase
Cla97C03G065550	1167	4869.6	2309.52	-1.0762	6.73e-126	1.94e-123	Down	NA	NA	NA	NA	NA	membrane protein C776.05-like	Glycerophosphocholine acyltransferase 1
Cla97C03G065810	1659	16.2168	4.11779	-1.97173	0.00267329	0.0136374	Down	K00279 CKX; cytokinin dehydrogenase [EC:1.5.99.12]	ko00908:Zeatin biosynthesis	GO:0003674;GO:0003824;GO:0008131;GO:0016491;GO:0016638;GO:0016641;GO:0016645;GO:0019139;	GO:0006725;GO:0006807;GO:0008150;GO:0008152;GO:0009056;GO:0009308;GO:0009690;GO:0009823;GO:0009987;GO:0010817;GO:0034754;GO:0042445;GO:0042447;GO:0044237;GO:0046483;GO:0055114;GO:0065007;GO:0065008;GO:0071704;GO:1901564;	GO:0005575;GO:0005576;GO:0005615;GO:0005622;GO:0005623;GO:0005737;GO:0005783;GO:0005788;GO:0012505;GO:0031974;GO:0043226;GO:0043227;GO:0043229;GO:0043231;GO:0043233;GO:0044421;GO:0044422;GO:0044424;GO:0044432;GO:0044444;GO:0044446;GO:0044464;GO:0070013;	Cytokinin dehydrogenase	Cytokinin dehydrogenase
Cla97C03G066340	504	65.674	22.5361	-1.5473	5.88e-07	7.5e-06	Down	NA	NA	NA	NA	NA	RNA binding	Oxidative stress 3, putative isoform 1
Cla97C03G066360	351	6344.64	2367.81	-1.42187	1.86e-36	1.57e-34	Down	NA	NA	NA	NA	NA	NA	Programmed cell death protein 4-like
Cla97C03G066400	1593	22.3532	4.12224	-2.43256	0.000107054	0.000840197	Down	K03327 TC.MATE, SLC47A, norM, mdtK, dinF; multidrug resistance protein, MATE family	NA	GO:0003674;GO:0005215;GO:0015238;GO:0022857;	GO:0006810;GO:0006855;GO:0007275;GO:0007568;GO:0008150;GO:0009653;GO:0010015;GO:0010150;GO:0010252;GO:0015893;GO:0022622;GO:0031347;GO:0031348;GO:0032501;GO:0032502;GO:0040008;GO:0042221;GO:0042493;GO:0042592;GO:0046620;GO:0048364;GO:0048366;GO:0048367;GO:0048519;GO:0048583;GO:0048585;GO:0048638;GO:0048731;GO:0048827;GO:0048856;GO:0048878;GO:0050789;GO:0050793;GO:0050801;GO:0050896;GO:0051179;GO:…	GO:0005575;GO:0005622;GO:0005623;GO:0005737;GO:0005768;GO:0005770;GO:0010008;GO:0012505;GO:0016020;GO:0031090;GO:0031410;GO:0031982;GO:0043226;GO:0043227;GO:0043229;GO:0044422;GO:0044424;GO:0044433;GO:0044440;GO:0044444;GO:0044446;GO:0044464;GO:0097708;GO:0098588;GO:0098805;	Belongs to the multi antimicrobial extrusion (MATE) (TC 2.A.66.1) family	Protein DETOXIFICATION
Cla97C03G066520	564	1338.55	423.134	-1.66165	9.94e-112	2.45e-109	Down	NA	NA	NA	GO:0006139;GO:0006725;GO:0006807;GO:0008150;GO:0008152;GO:0009451;GO:0009987;GO:0016070;GO:0034641;GO:0043170;GO:0043412;GO:0044237;GO:0044238;GO:0046483;GO:0071704;GO:0090304;GO:1901360;	NA	deaminase	guanine deaminase
Cla97C03G066730	1140	213.251	102.689	-1.05399	8.14e-11	1.76e-09	Down	K25784 BZIP9_10_25_63; bZIP transcription factor 9/10/25/63	NA	GO:0003674;GO:0003676;GO:0003677;GO:0003700;GO:0005488;GO:0005515;GO:0042802;GO:0043565;GO:0046982;GO:0046983;GO:0097159;GO:0140110;GO:1901363;	GO:0001101;GO:0001678;GO:0006109;GO:0006355;GO:0008150;GO:0009719;GO:0009725;GO:0009737;GO:0009743;GO:0009746;GO:0009749;GO:0009889;GO:0009891;GO:0009893;GO:0009987;GO:0010033;GO:0010468;GO:0010556;GO:0010557;GO:0010581;GO:0010604;GO:0010628;GO:0010675;GO:0010962;GO:0019219;GO:0019222;GO:0019725;GO:0031323;GO:0031325;GO:0031326;GO:0031328;GO:0032870;GO:0032881;GO:0032885;GO:0033500;GO:0033993;GO:…	GO:0005575;GO:0005622;GO:0005623;GO:0005634;GO:0043226;GO:0043227;GO:0043229;GO:0043231;GO:0044424;GO:0044464;	Light-inducible protein	Light-inducible protein CPRF2-like
Cla97C03G067240	2295	51.0376	25.0117	-1.02637	0.00130272	0.00737016	Down	NA	NA	NA	GO:0006464;GO:0006807;GO:0008150;GO:0008152;GO:0009314;GO:0009416;GO:0009605;GO:0009606;GO:0009628;GO:0009637;GO:0009638;GO:0009987;GO:0016567;GO:0019538;GO:0032446;GO:0036211;GO:0043170;GO:0043412;GO:0044237;GO:0044238;GO:0044260;GO:0044267;GO:0050896;GO:0070647;GO:0071704;GO:1901564;	GO:0005575;GO:0005623;GO:0005886;GO:0016020;GO:0044464;GO:0071944;	Belongs to the NPH3 family	Root phototropism protein 3-like isoform X1
Cla97C03G067480	297	329.476	60.718	-2.43901	6.5e-43	6.56e-41	Down	NA	NA	NA	NA	NA	dormancy auxin associated family protein	dormancy-associated protein homolog 3-like isoform X1
Cla97C03G067540	1761	9.26226	0	-5.71924	6.3e-05	0.000527474	Down	K01051 E3.1.1.11; pectinesterase [EC:3.1.1.11]	ko00040:Pentose and glucuronate interconversions	GO:0003674;GO:0003824;GO:0004857;GO:0016787;GO:0016788;GO:0030234;GO:0030599;GO:0046910;GO:0052689;GO:0098772;	GO:0008150;GO:0043086;GO:0044092;GO:0050790;GO:0065007;GO:0065009;	GO:0005575;GO:0005623;GO:0044464;GO:0071944;	Acts in the modification of cell walls via demethylesterification of cell wall pectin	Pectinesterase
Cla97C03G067590	2100	53609.4	26464.9	-1.01837	1.84e-213	1.06e-210	Down	K04079 HSP90A, htpG; molecular chaperone HtpG	ko04141:Protein processing in endoplasmic reticulum|ko04626:Plant-pathogen interaction	GO:0003674;GO:0003824;GO:0016462;GO:0016787;GO:0016817;GO:0016818;GO:0016887;GO:0017111;	GO:0002376;GO:0006457;GO:0006950;GO:0006952;GO:0006955;GO:0008150;GO:0009266;GO:0009408;GO:0009605;GO:0009607;GO:0009617;GO:0009628;GO:0009814;GO:0009816;GO:0009987;GO:0010035;GO:0010038;GO:0016043;GO:0022607;GO:0034622;GO:0042221;GO:0042742;GO:0043207;GO:0043933;GO:0044085;GO:0045087;GO:0050896;GO:0051131;GO:0051592;GO:0051704;GO:0051707;GO:0051716;GO:0061077;GO:0065003;GO:0070887;GO:0071241;GO:…	GO:0005575;GO:0005576;GO:0005618;GO:0005622;GO:0005623;GO:0005634;GO:0005730;GO:0005737;GO:0005773;GO:0005774;GO:0005794;GO:0005829;GO:0005886;GO:0009507;GO:0009532;GO:0009536;GO:0009570;GO:0012505;GO:0016020;GO:0030312;GO:0031090;GO:0031974;GO:0031981;GO:0043226;GO:0043227;GO:0043228;GO:0043229;GO:0043231;GO:0043232;GO:0043233;GO:0044422;GO:0044424;GO:0044428;GO:0044434;GO:0044435;GO:0044437;GO:…	heat shock	Heat shock protein, putative
Cla97C03G067810	1281	38.1232	0.934655	-5.32888	6.54e-09	1.11e-07	Down	NA	NA	NA	NA	NA	Calmodulin-binding protein	Calmodulin-binding protein 60 G-like
Cla97C03G067840	1134	3.59724	0	-4.35137	0.0126416	0.0495116	Down	NA	NA	NA	NA	NA	Calmodulin-binding protein	calmodulin-binding protein 60 G-like
Cla97C04G069310	825	7.57527	0.952747	-2.99702	0.0115077	0.0458717	Down	NA	NA	NA	NA	NA	Encoded by	S-protein homolog
Cla97C04G069570	1374	33.1725	5.06738	-2.70131	5.75e-07	7.36e-06	Down	K14498 SNRK2; serine/threonine-protein kinase SRK2 [EC:2.7.11.1]	ko04016:MAPK signaling pathway - plant|ko04075:Plant hormone signal transduction	GO:0003674;GO:0003676;GO:0003723;GO:0003729;GO:0003824;GO:0004672;GO:0004674;GO:0005488;GO:0016301;GO:0016740;GO:0016772;GO:0016773;GO:0097159;GO:0140096;GO:1901363;	GO:0006464;GO:0006468;GO:0006793;GO:0006796;GO:0006807;GO:0006950;GO:0006970;GO:0007154;GO:0007165;GO:0008150;GO:0008152;GO:0009628;GO:0009651;GO:0009987;GO:0016310;GO:0019538;GO:0023052;GO:0035556;GO:0036211;GO:0043170;GO:0043412;GO:0044237;GO:0044238;GO:0044260;GO:0044267;GO:0050789;GO:0050794;GO:0050896;GO:0051716;GO:0065007;GO:0071704;GO:1901564;	GO:0005575;GO:0005622;GO:0005623;GO:0005634;GO:0005737;GO:0043226;GO:0043227;GO:0043229;GO:0043231;GO:0044424;GO:0044464;	Belongs to the protein kinase superfamily	Protein kinase
Cla97C04G069670	1824	723.795	325.074	-1.15466	5.18e-36	4.34e-34	Down	NA	NA	NA	NA	NA	Lipase (class 3)	lipase-like PAD4
Cla97C04G071360	666	13.1665	1.59968	-3.04282	0.000919627	0.00546953	Down	NA	NA	NA	NA	NA	NA	Proline-rich protein HaeIII subfamily 1-like
Cla97C04G071950	636	1254.64	168.419	-2.89547	2.38e-205	1.26e-202	Down	K13993 HSP20; HSP20 family protein	ko04141:Protein processing in endoplasmic reticulum	NA	GO:0006950;GO:0006970;GO:0008150;GO:0009266;GO:0009408;GO:0009628;GO:0050896;	NA	Belongs to the small heat shock protein (HSP20) family	Small heat shock protein
Cla97C04G072390	1299	976.09	378.518	-1.36585	4.9e-58	6.39e-56	Down	NA	NA	NA	GO:0007154;GO:0007165;GO:0008150;GO:0009719;GO:0009725;GO:0009733;GO:0009734;GO:0009755;GO:0009987;GO:0010033;GO:0023052;GO:0032870;GO:0042221;GO:0050789;GO:0050794;GO:0050896;GO:0051716;GO:0065007;GO:0070887;GO:0071310;GO:0071365;GO:0071495;	GO:0005575;GO:0005622;GO:0005623;GO:0005737;GO:0005886;GO:0005887;GO:0005938;GO:0016020;GO:0016021;GO:0031224;GO:0031226;GO:0044424;GO:0044425;GO:0044444;GO:0044459;GO:0044464;GO:0071944;GO:0099568;	WAT1-related protein	WAT1-related protein
Cla97C04G072960	423	11454.6	5638.77	-1.0227	1.22e-196	6.32e-194	Down	NA	NA	NA	GO:0006810;GO:0006869;GO:0008150;GO:0010876;GO:0033036;GO:0051179;GO:0051234;GO:0071702;	GO:0005575;GO:0016020;	Plant non-specific lipid-transfer proteins transfer phospholipids as well as galactolipids across membranes. May play a role in wax or cutin deposition in the cell walls of expanding epidermal cells and certain secretory tissues	Non-specific lipid-transfer protein
Cla97C04G073540	276	65.6	32.681	-1.00756	0.000298605	0.00205581	Down	NA	NA	GO:0003674;GO:0003676;GO:0003677;GO:0005488;GO:0097159;GO:1901363;	GO:0000003;GO:0001101;GO:0003006;GO:0007275;GO:0008150;GO:0009719;GO:0009725;GO:0009737;GO:0009791;GO:0010033;GO:0010154;GO:0010162;GO:0010431;GO:0021700;GO:0022414;GO:0022611;GO:0031647;GO:0032501;GO:0032502;GO:0032504;GO:0033993;GO:0042221;GO:0048316;GO:0048608;GO:0048609;GO:0048700;GO:0048731;GO:0048856;GO:0050821;GO:0050896;GO:0061458;GO:0065007;GO:0065008;GO:0071695;GO:0097305;GO:0097439;GO:…	GO:0005575;GO:0005622;GO:0005623;GO:0005737;GO:0005829;GO:0044424;GO:0044444;GO:0044464;	abundant protein	protein EMB-1
Cla97C04G074200	300	27.6811	6.65658	-2.05877	5.17e-05	0.000443223	Down	NA	NA	NA	NA	NA	NA	Unknown protein
Cla97C04G074210	432	512.213	111.792	-2.19572	3.99e-68	6.35e-66	Down	K13993 HSP20; HSP20 family protein	ko04141:Protein processing in endoplasmic reticulum	NA	NA	NA	Belongs to the small heat shock protein (HSP20) family	class I heat shock protein-like
Cla97C04G074240	1437	60.5122	13.9709	-2.11221	2.48e-09	4.45e-08	Down	NA	NA	NA	NA	NA	Belongs to the UDP-glycosyltransferase family	Glycosyltransferase
Cla97C04G074320	477	1288.04	308.36	-2.0628	2.08e-138	6.89e-136	Down	NA	NA	NA	NA	NA	expressed protein	Encodes a protein involved in salt tolerance, names SIS (Salt Induced Serine rich).
Cla97C04G076150	831	69.5626	33.9469	-1.04031	0.000344778	0.00233312	Down	K01674 cah; carbonic anhydrase [EC:4.2.1.1]	ko00910:Nitrogen metabolism	NA	NA	NA	Bifunctional monodehydroascorbate reductase and carbonic anhydrase nectarin-3-like	Carbonic anhydrase
Cla97C04G077250	1269	229.128	102.088	-1.1686	7.23e-14	2.11e-12	Down	K01054 MGLL; acylglycerol lipase [EC:3.1.1.23]	ko00561:Glycerolipid metabolism	NA	NA	NA	Monoglyceride lipase-like	alpha/beta-Hydrolases superfamily protein
Cla97C04G078780	2727	21444.7	1319.13	-4.02277	0	0	Down	K03695 clpB; ATP-dependent Clp protease ATP-binding subunit ClpB	NA	NA	GO:0000302;GO:0006417;GO:0006950;GO:0006979;GO:0008150;GO:0009266;GO:0009314;GO:0009408;GO:0009416;GO:0009628;GO:0009636;GO:0009642;GO:0009644;GO:0009889;GO:0009891;GO:0009893;GO:0009987;GO:0010035;GO:0010468;GO:0010556;GO:0010557;GO:0010604;GO:0010608;GO:0010628;GO:0019222;GO:0031323;GO:0031325;GO:0031326;GO:0031328;GO:0032268;GO:0032270;GO:0033554;GO:0034248;GO:0034250;GO:0034605;GO:0042221;GO:…	GO:0005575;GO:0005622;GO:0005623;GO:0005737;GO:0009507;GO:0009526;GO:0009532;GO:0009536;GO:0009570;GO:0009941;GO:0031967;GO:0031975;GO:0043226;GO:0043227;GO:0043229;GO:0043231;GO:0044422;GO:0044424;GO:0044434;GO:0044435;GO:0044444;GO:0044446;GO:0044464;	Chaperone protein	chaperone protein ClpB1
Cla97C04G079030	996	100.996	44.3843	-1.18471	3.39e-07	4.53e-06	Down	NA	NA	GO:0003674;GO:0003700;GO:0140110;	GO:0006355;GO:0008150;GO:0009889;GO:0010468;GO:0010556;GO:0019219;GO:0019222;GO:0031323;GO:0031326;GO:0050789;GO:0050794;GO:0051171;GO:0051252;GO:0060255;GO:0065007;GO:0080090;GO:1903506;GO:2000112;GO:2001141;GO:0008152;GO:0006139;GO:0006351;GO:0006725;GO:0006807;GO:0009058;GO:0009059;GO:0009987;GO:0010467;GO:0016070;GO:0018130;GO:0019438;GO:0032774;GO:0034641;GO:0034645;GO:0034654;GO:0043170;GO:…	NA	NAC domain-containing protein	NAC domain-containing protein
Cla97C04G079060	723	7.97813	0	-5.51255	0.000152775	0.00114008	Down	K20628 exlX; expansin	NA	NA	NA	NA	Rare lipoprotein A (RlpA)-like double-psi beta-barrel	Expansin
Cla97C04G079270	708	3273.59	1457.7	-1.16735	1.72e-116	4.57e-114	Down	K00799 GST, gst; glutathione S-transferase [EC:2.5.1.18]	ko00480:Glutathione metabolism	GO:0003674;GO:0003824;GO:0004364;GO:0016740;GO:0016765;	GO:0006518;GO:0006575;GO:0006749;GO:0006790;GO:0006807;GO:0008150;GO:0008152;GO:0009056;GO:0009404;GO:0009407;GO:0009636;GO:0009987;GO:0019748;GO:0034641;GO:0042221;GO:0043603;GO:0044237;GO:0044248;GO:0050896;GO:0051186;GO:0071704;GO:0098754;GO:1901564;	GO:0005575;GO:0005622;GO:0005623;GO:0005737;GO:0044424;GO:0044464;	Glutathione S-transferase	Glutathione s-transferase
Cla97C04G079350	948	251.226	106.555	-1.23982	1.28e-15	4.28e-14	Down	NA	NA	NA	NA	NA	Belongs to the iron ascorbate-dependent oxidoreductase family	flavonol synthase/flavanone 3-hydroxylase-like
Cla97C04G079370	852	139.765	52.1178	-1.42656	3.85e-11	8.67e-10	Down	NA	NA	GO:0003674;GO:0003700;GO:0140110;	GO:0000003;GO:0001101;GO:0003006;GO:0006355;GO:0007275;GO:0008150;GO:0008283;GO:0009719;GO:0009725;GO:0009735;GO:0009737;GO:0009739;GO:0009791;GO:0009889;GO:0010029;GO:0010033;GO:0010229;GO:0010468;GO:0010556;GO:0019219;GO:0019222;GO:0022414;GO:0031323;GO:0031326;GO:0031347;GO:0032501;GO:0032502;GO:0033993;GO:0042221;GO:0048367;GO:0048580;GO:0048583;GO:0048608;GO:0048731;GO:0048856;GO:0050789;GO:…	GO:0005575;GO:0005622;GO:0005623;GO:0005634;GO:0043226;GO:0043227;GO:0043229;GO:0043231;GO:0044424;GO:0044464;	Transcription factor	TCP domain-containing protein
Cla97C05G079920	666	358.62	122.128	-1.55326	2.7e-28	1.79e-26	Down	NA	NA	NA	NA	NA	Late embryogenesis abundant protein	Late embryogenesis abundant (LEA) hydroxyproline-rich glycoprotein family
Cla97C05G079930	1158	892.546	436.068	-1.03419	2.83e-35	2.32e-33	Down	NA	NA	GO:0003674;GO:0003700;GO:0140110;	GO:0006355;GO:0008150;GO:0009889;GO:0010468;GO:0010556;GO:0019219;GO:0019222;GO:0031323;GO:0031326;GO:0050789;GO:0050794;GO:0051171;GO:0051252;GO:0060255;GO:0065007;GO:0080090;GO:1903506;GO:2000112;GO:2001141;GO:0008152;GO:0006139;GO:0006351;GO:0006725;GO:0006807;GO:0009058;GO:0009059;GO:0009987;GO:0010467;GO:0016070;GO:0018130;GO:0019438;GO:0032774;GO:0034641;GO:0034645;GO:0034654;GO:0043170;GO:…	NA	transcription factor	transcription factor bHLH57-like
Cla97C05G080560	693	363.367	35.7651	-3.3427	3.24e-75	5.58e-73	Down	K09338 HD-ZIP; homeobox-leucine zipper protein	NA	GO:0003674;GO:0003676;GO:0003677;GO:0003700;GO:0005488;GO:0043565;GO:0097159;GO:0140110;GO:1901363;	GO:0001101;GO:0006355;GO:0006950;GO:0006970;GO:0008150;GO:0009414;GO:0009415;GO:0009605;GO:0009607;GO:0009615;GO:0009628;GO:0009719;GO:0009725;GO:0009737;GO:0009889;GO:0009891;GO:0009893;GO:0010033;GO:0010035;GO:0010468;GO:0010556;GO:0010557;GO:0010604;GO:0010628;GO:0019219;GO:0019222;GO:0031323;GO:0031325;GO:0031326;GO:0031328;GO:0033993;GO:0042221;GO:0043207;GO:0045893;GO:0045935;GO:0048518;GO:…	GO:0005575;GO:0005622;GO:0005623;GO:0005634;GO:0043226;GO:0043227;GO:0043229;GO:0043231;GO:0044424;GO:0044464;	Homeobox-leucine zipper protein	Homeobox leucine zipper family protein
Cla97C05G081100	639	53.0984	6.64323	-2.99554	1.22e-11	2.89e-10	Down	K08901 psbQ; photosystem II oxygen-evolving enhancer protein 3	ko00195:Photosynthesis	GO:0003674;GO:0003824;GO:0009055;GO:0016491;GO:0045156;	GO:0006091;GO:0008150;GO:0008152;GO:0009767;GO:0009987;GO:0015979;GO:0019684;GO:0022900;GO:0044237;GO:0055114;	GO:0005575;GO:0005622;GO:0005623;GO:0005737;GO:0009344;GO:0009507;GO:0009534;GO:0009535;GO:0009536;GO:0009543;GO:0009579;GO:0016020;GO:0031976;GO:0031977;GO:0031978;GO:0031984;GO:0032991;GO:0034357;GO:0042651;GO:0043226;GO:0043227;GO:0043229;GO:0043231;GO:0044422;GO:0044424;GO:0044434;GO:0044435;GO:0044436;GO:0044444;GO:0044446;GO:0044464;GO:0055035;	psbQ-like protein 1	photosynthetic NDH subunit of lumenal location 2, chloroplastic
Cla97C05G081460	1929	24.6909	8.83457	-1.4859	0.00336634	0.0165396	Down	K01183 E3.2.1.14; chitinase [EC:3.2.1.14]	ko00520:Amino sugar and nucleotide sugar metabolism	NA	NA	NA	Belongs to the glycosyl hydrolase 18 family	Acidic endochitinase-like
Cla97C05G085960	1071	18.1749	4.76028	-1.93238	0.00182996	0.00989543	Down	K09419 HSFF; heat shock transcription factor, other eukaryote	NA	GO:0003674;GO:0003700;GO:0140110;	GO:0006355;GO:0008150;GO:0009889;GO:0010468;GO:0010556;GO:0019219;GO:0019222;GO:0031323;GO:0031326;GO:0050789;GO:0050794;GO:0051171;GO:0051252;GO:0060255;GO:0065007;GO:0080090;GO:1903506;GO:2000112;GO:2001141;GO:0008152;GO:0006139;GO:0006351;GO:0006725;GO:0006807;GO:0009058;GO:0009059;GO:0009987;GO:0010467;GO:0016070;GO:0018130;GO:0019438;GO:0032774;GO:0034641;GO:0034645;GO:0034654;GO:0043170;GO:…	NA	Heat Stress Transcription Factor	heat stress transcription factor A-6b
Cla97C05G086420	1716	849.441	345.688	-1.2961	7.51e-52	8.62e-50	Down	K09489 HSPA4; heat shock 70kDa protein 4	NA	NA	GO:0000302;GO:0006950;GO:0006979;GO:0008150;GO:0009266;GO:0009314;GO:0009408;GO:0009416;GO:0009628;GO:0009636;GO:0009642;GO:0009644;GO:0010035;GO:0042221;GO:0042493;GO:0042542;GO:0046677;GO:0050896;GO:1901700;	NA	Heat shock 70 kDa protein	Heat shock 70 kDa protein 8
Cla97C05G086520	1533	31.6004	12.3639	-1.35029	0.00173902	0.00946959	Down	K24193 STP; MFS transporter, SP family, sugar:H+ symporter	NA	GO:0003674;GO:0005215;GO:0005351;GO:0005355;GO:0005356;GO:0005358;GO:0005402;GO:0008324;GO:0009679;GO:0015075;GO:0015077;GO:0015078;GO:0015144;GO:0015145;GO:0015149;GO:0015291;GO:0015293;GO:0015294;GO:0015295;GO:0015318;GO:0022804;GO:0022857;GO:0022890;GO:0051119;	GO:0001101;GO:0006810;GO:0006811;GO:0006812;GO:0006950;GO:0006970;GO:0008150;GO:0008643;GO:0008645;GO:0009414;GO:0009415;GO:0009628;GO:0009651;GO:0009719;GO:0009725;GO:0009737;GO:0010033;GO:0010035;GO:0015672;GO:0015749;GO:0033993;GO:0034219;GO:0034220;GO:0042221;GO:0046323;GO:0050896;GO:0051179;GO:0051234;GO:0055085;GO:0071702;GO:0097305;GO:0098655;GO:0098660;GO:0098662;GO:1901700;GO:1902600;GO:…	GO:0005575;GO:0005623;GO:0005886;GO:0005911;GO:0009506;GO:0016020;GO:0030054;GO:0044464;GO:0055044;GO:0071944;	Belongs to the major facilitator superfamily. Sugar transporter (TC 2.A.1.1) family	sugar transport protein 13-like
Cla97C05G086630	1578	114.159	43.1832	-1.3991	6.63e-09	1.12e-07	Down	K00975 glgC; glucose-1-phosphate adenylyltransferase [EC:2.7.7.27]	ko00500:Starch and sucrose metabolism|ko00520:Amino sugar and nucleotide sugar metabolism	GO:0003674;GO:0003824;GO:0008878;GO:0016740;GO:0016772;GO:0016779;GO:0070566;	NA	GO:0005575;GO:0005622;GO:0005623;GO:0005737;GO:0009501;GO:0009507;GO:0009526;GO:0009532;GO:0009536;GO:0009570;GO:0009941;GO:0031967;GO:0031975;GO:0043226;GO:0043227;GO:0043229;GO:0043231;GO:0044422;GO:0044424;GO:0044434;GO:0044435;GO:0044444;GO:0044446;GO:0044464;	This protein plays a role in synthesis of starch. It catalyzes the synthesis of the activated glycosyl donor, ADP- glucose from Glc-1-P and ATP	Glucose-1-phosphate adenylyltransferase
Cla97C05G087760	459	48.3612	14.2675	-1.76171	1.25e-06	1.5e-05	Down	NA	NA	NA	NA	NA	zinc-finger of the FCS-type, C2-C2	FLZ-type domain-containing protein
Cla97C05G087870	633	42.9909	19.0204	-1.17481	0.000967478	0.0057154	Down	K09286 EREBP; EREBP-like factor	NA	GO:0003674;GO:0003676;GO:0003677;GO:0003700;GO:0005488;GO:0043565;GO:0097159;GO:0140110;GO:1901363;	GO:0000160;GO:0001101;GO:0006355;GO:0006950;GO:0007154;GO:0007165;GO:0008150;GO:0008219;GO:0009266;GO:0009408;GO:0009605;GO:0009607;GO:0009628;GO:0009719;GO:0009723;GO:0009725;GO:0009735;GO:0009753;GO:0009755;GO:0009873;GO:0009889;GO:0009891;GO:0009893;GO:0009987;GO:0010033;GO:0010286;GO:0010468;GO:0010556;GO:0010557;GO:0010604;GO:0010628;GO:0019219;GO:0019222;GO:0023052;GO:0031323;GO:0031325;GO:…	GO:0005575;GO:0005622;GO:0005623;GO:0005634;GO:0005737;GO:0005886;GO:0016020;GO:0043226;GO:0043227;GO:0043229;GO:0043231;GO:0044424;GO:0044464;GO:0071944;	ethylene-responsive transcription factor	ethylene-responsive transcription factor ERF071-like
Cla97C05G088320	933	71.5295	35.5291	-1.01346	0.000272975	0.00190548	Down	K09422 MYBP; transcription factor MYB, plant	NA	GO:0000981;GO:0001067;GO:0001134;GO:0001135;GO:0003674;GO:0003676;GO:0003677;GO:0003700;GO:0005488;GO:0043565;GO:0044212;GO:0097159;GO:0140110;GO:1901363;GO:0005515;GO:0008134;	GO:0001101;GO:0006355;GO:0006357;GO:0006950;GO:0006970;GO:0008150;GO:0009605;GO:0009607;GO:0009620;GO:0009628;GO:0009651;GO:0009719;GO:0009723;GO:0009725;GO:0009737;GO:0009753;GO:0009889;GO:0009987;GO:0010033;GO:0010468;GO:0010556;GO:0019219;GO:0019222;GO:0030154;GO:0031323;GO:0031326;GO:0032502;GO:0033993;GO:0042221;GO:0043207;GO:0048869;GO:0050789;GO:0050794;GO:0050896;GO:0051171;GO:0051252;GO:…	GO:0005575;GO:0005622;GO:0005623;GO:0005634;GO:0043226;GO:0043227;GO:0043229;GO:0043231;GO:0044424;GO:0044464;	Transcription factor	transcription factor MYB108
Cla97C05G088420	831	2608.89	1189.83	-1.13245	1.83e-92	3.81e-90	Down	K11188 PRDX6; peroxiredoxin 6 [EC:1.11.1.7 1.11.1.27 3.1.1.-]	ko00480:Glutathione metabolism|ko00940:Phenylpropanoid biosynthesis	GO:0003674;GO:0003824;GO:0004601;GO:0008379;GO:0016209;GO:0016491;GO:0016684;GO:0051920;	GO:0000003;GO:0001101;GO:0003006;GO:0006950;GO:0007275;GO:0008150;GO:0008152;GO:0009269;GO:0009414;GO:0009415;GO:0009628;GO:0009636;GO:0009791;GO:0009987;GO:0010035;GO:0010154;GO:0010162;GO:0010231;GO:0010431;GO:0021700;GO:0022414;GO:0022611;GO:0032501;GO:0032502;GO:0032504;GO:0042221;GO:0048316;GO:0048608;GO:0048609;GO:0048731;GO:0048856;GO:0050896;GO:0051716;GO:0055114;GO:0061458;GO:0070887;GO:…	NA	1-Cys peroxiredoxin	Peroxiredoxin
Cla97C05G088850	1722	18568	2588.87	-2.84251	0	0	Down	K09571 FKBP4_5; FK506-binding protein 4/5 [EC:5.2.1.8]	NA	NA	NA	NA	Peptidyl-prolyl	Peptidylprolyl isomerase
Cla97C05G089130	1773	459.924	210.497	-1.12903	7.11e-23	3.78e-21	Down	NA	NA	GO:0003674;GO:0003824;GO:0016491;GO:0016722;	GO:0008150;GO:0008152;GO:0055114;	GO:0005575;GO:0005623;GO:0005886;GO:0005911;GO:0009506;GO:0016020;GO:0030054;GO:0031224;GO:0031225;GO:0031226;GO:0044425;GO:0044459;GO:0044464;GO:0046658;GO:0055044;GO:0071944;	Monocopper oxidase-like protein	monocopper oxidase-like protein SKS1
Cla97C05G089370	1413	116.166	47.9524	-1.27351	8.78e-08	1.28e-06	Down	NA	NA	NA	NA	NA	Domain of unknown function (DUF3475)	Protein of unknown function (DUF668)
Cla97C05G089700	1098	4330.95	1458.17	-1.57049	2.55e-253	1.91e-250	Down	K00008 SORD, gutB; L-iditol 2-dehydrogenase [EC:1.1.1.14]	ko00040:Pentose and glucuronate interconversions|ko00051:Fructose and mannose metabolism	GO:0003674;GO:0003824;GO:0003939;GO:0016491;GO:0016614;GO:0016616;	GO:0008150;GO:0008152;GO:0055114;	GO:0005575;GO:0005622;GO:0005623;GO:0005737;GO:0005829;GO:0005911;GO:0009506;GO:0030054;GO:0044424;GO:0044444;GO:0044464;GO:0055044;	Sorbitol dehydrogenase-like	sorbitol dehydrogenase
Cla97C05G089710	720	342.439	151.363	-1.17884	1.68e-19	7.45e-18	Down	NA	NA	NA	NA	NA	NA	ATP-dependent Clp protease ATP-binding subunit clpX
Cla97C05G089920	1212	986.07	476.088	-1.05001	5.15e-40	4.86e-38	Down	K09419 HSFF; heat shock transcription factor, other eukaryote	NA	GO:0003674;GO:0003700;GO:0140110;	GO:0006355;GO:0008150;GO:0009889;GO:0010033;GO:0010200;GO:0010243;GO:0010468;GO:0010556;GO:0019219;GO:0019222;GO:0031323;GO:0031326;GO:0042221;GO:0042493;GO:0050789;GO:0050794;GO:0050896;GO:0051171;GO:0051252;GO:0060255;GO:0065007;GO:0080090;GO:1901698;GO:1901700;GO:1903506;GO:2000112;GO:2001141;GO:0008152;GO:0006139;GO:0006351;GO:0006725;GO:0006807;GO:0009058;GO:0009059;GO:0009987;GO:0010467;GO:…	NA	Heat Stress Transcription Factor	heat stress transcription factor B-2b-like
Cla97C05G090520	522	352.864	15.2097	-4.53514	5.47e-78	9.77e-76	Down	NA	NA	NA	NA	NA	NA	Transmembrane protein, putative
Cla97C05G092670	681	176.099	71.5895	-1.2967	1.74e-12	4.51e-11	Down	K09422 MYBP; transcription factor MYB, plant	NA	GO:0000981;GO:0001067;GO:0001134;GO:0001135;GO:0003674;GO:0003676;GO:0003677;GO:0003700;GO:0005488;GO:0043565;GO:0044212;GO:0097159;GO:0140110;GO:1901363;GO:0005515;GO:0008134;	GO:0001101;GO:0006355;GO:0006357;GO:0006950;GO:0006952;GO:0006970;GO:0008150;GO:0009414;GO:0009415;GO:0009605;GO:0009607;GO:0009617;GO:0009620;GO:0009628;GO:0009651;GO:0009719;GO:0009723;GO:0009725;GO:0009733;GO:0009737;GO:0009739;GO:0009751;GO:0009753;GO:0009889;GO:0009966;GO:0009967;GO:0009987;GO:0010033;GO:0010035;GO:0010038;GO:0010200;GO:0010243;GO:0010468;GO:0010556;GO:0010646;GO:0010647;GO:…	GO:0005575;GO:0005622;GO:0005623;GO:0005634;GO:0043226;GO:0043227;GO:0043229;GO:0043231;GO:0044424;GO:0044464;	transcription factor	transcription factor MYB44-like
Cla97C05G094040	567	446.026	172.495	-1.37155	4.53e-32	3.35e-30	Down	K23327 HIKESHI; protein Hikeshi	NA	NA	NA	NA	Protein OPI10 homolog	DUF775 domain-containing protein
Cla97C05G094310	1533	547.5	103.047	-2.41001	1.07e-84	2.06e-82	Down	NA	NA	NA	NA	NA	Protein of unknown function (DUF3754)	Protein of unknown function (DUF3754)
Cla97C05G094590	303	62.9061	27.4565	-1.19193	0.000149368	0.00111962	Down	NA	NA	NA	NA	NA	Cleavage site for pathogenic type III effector avirulence factor Avr	AvrRpt-cleavage domain-containing protein
Cla97C05G095410	1161	3099.09	1172.75	-1.40165	1.97e-160	7.94e-158	Down	K18696 GDE1; glycerophosphodiester phosphodiesterase [EC:3.1.4.46]	ko00564:Glycerophospholipid metabolism	GO:0000287;GO:0003674;GO:0003824;GO:0005488;GO:0008081;GO:0008889;GO:0016787;GO:0016788;GO:0042578;GO:0043167;GO:0043169;GO:0046872;GO:0047389;	GO:0006629;GO:0006644;GO:0006650;GO:0006793;GO:0006796;GO:0006873;GO:0008150;GO:0008152;GO:0009056;GO:0009395;GO:0009987;GO:0016042;GO:0019637;GO:0019725;GO:0030002;GO:0030320;GO:0030643;GO:0042592;GO:0044237;GO:0044238;GO:0044242;GO:0044248;GO:0044255;GO:0046434;GO:0046475;GO:0046486;GO:0046503;GO:0048878;GO:0050801;GO:0055062;GO:0055081;GO:0055082;GO:0055083;GO:0065007;GO:0065008;GO:0071704;GO:…	GO:0005575;GO:0005622;GO:0005623;GO:0005737;GO:0009536;GO:0043226;GO:0043227;GO:0043229;GO:0043231;GO:0044424;GO:0044444;GO:0044464;	Glycerophosphodiester phosphodiesterase	Glycerophosphodiester phosphodiesterase
Cla97C05G095940	1374	6774.07	2613.81	-1.37366	4.65e-235	2.85e-232	Down	NA	NA	NA	GO:0001101;GO:0006464;GO:0006807;GO:0008150;GO:0008152;GO:0009719;GO:0009725;GO:0009751;GO:0009987;GO:0010033;GO:0014070;GO:0019538;GO:0036211;GO:0042221;GO:0042493;GO:0043170;GO:0043412;GO:0044237;GO:0044238;GO:0044260;GO:0044267;GO:0046677;GO:0050896;GO:0071704;GO:1901564;GO:1901700;	NA	Ubiquitin exists either covalently attached to another protein, or free (unanchored). When covalently bound, it is conjugated to target proteins via an isopeptide bond either as a monomer (monoubiquitin), a polymer linked via different Lys residues of the ubiquitin (polyubiquitin chains) or a linear polymer linked via the initiator Met of the ubiquitin (linear polyubiquitin chains). Polyubiquitin…	Polyubiquitin
Cla97C05G096020	363	29.6835	10.1078	-1.54573	0.00104715	0.00611801	Down	K03671 trxA; thioredoxin 1	NA	GO:0003674;GO:0003756;GO:0003824;GO:0004791;GO:0015035;GO:0015036;GO:0016209;GO:0016491;GO:0016651;GO:0016667;GO:0016668;GO:0016671;GO:0016853;GO:0016860;GO:0016864;GO:0047134;GO:0140096;	GO:0006950;GO:0006979;GO:0008150;GO:0008152;GO:0009636;GO:0009987;GO:0019725;GO:0033554;GO:0034599;GO:0042221;GO:0042592;GO:0045454;GO:0050789;GO:0050794;GO:0050896;GO:0051716;GO:0055114;GO:0065007;GO:0065008;GO:0070887;GO:0097237;GO:0098754;GO:0098869;GO:1990748;	GO:0005575;GO:0005622;GO:0005623;GO:0005737;GO:0005829;GO:0044424;GO:0044444;GO:0044464;	Belongs to the thioredoxin family	thioredoxin-like protein CXXS1
Cla97C05G096080	1317	180.607	80.7878	-1.16065	1.5e-11	3.52e-10	Down	NA	NA	NA	NA	NA	zinc finger	C2H2-type domain-containing protein
Cla97C05G096220	1824	2644.02	1155.77	-1.19371	1.46e-115	3.84e-113	Down	K14487 GH3; auxin responsive GH3 gene family	ko04075:Plant hormone signal transduction	GO:0003674;GO:0003824;GO:0010279;GO:0016874;GO:0016879;GO:0016881;	GO:0000902;GO:0006725;GO:0006790;GO:0006807;GO:0007154;GO:0007165;GO:0008150;GO:0008152;GO:0009058;GO:0009314;GO:0009403;GO:0009404;GO:0009416;GO:0009628;GO:0009653;GO:0009700;GO:0009719;GO:0009725;GO:0009733;GO:0009734;GO:0009755;GO:0009826;GO:0009889;GO:0009891;GO:0009893;GO:0009987;GO:0010033;GO:0010120;GO:0010252;GO:0016043;GO:0016049;GO:0018130;GO:0019222;GO:0019438;GO:0019748;GO:0023052;GO:…	GO:0005575;GO:0005622;GO:0005623;GO:0005737;GO:0009507;GO:0009536;GO:0043226;GO:0043227;GO:0043229;GO:0043231;GO:0044424;GO:0044444;GO:0044464;	Indole-3-acetic acid-amido synthetase	Auxin-responsive GH3 family protein
Cla97C05G096920	906	16.284	5.07628	-1.68446	0.00748846	0.0322443	Down	NA	NA	NA	NA	NA	NA	Hydroxyproline-rich glycoprotein family protein
Cla97C05G097000	465	106.588	50.0465	-1.08718	1.64e-06	1.93e-05	Down	NA	NA	NA	GO:0008150;GO:0032879;GO:0032890;GO:0034762;GO:0034765;GO:0043269;GO:0044070;GO:0050789;GO:0051049;GO:0051952;GO:0051955;GO:0065007;GO:0080143;GO:1903789;GO:1903959;GO:0051179;GO:0006810;GO:0015849;GO:0051234;GO:0071702;GO:0055085;GO:0006811;GO:0034220;GO:0006820;GO:0015837;GO:0071705;GO:0006865;GO:0015711;GO:0046942;GO:0003333;GO:0032973;GO:0098656;GO:0140115;GO:1903825;GO:1905039;	GO:0005575;GO:0016020;GO:0016021;GO:0031224;GO:0044425;	Protein GLUTAMINE DUMPER	protein GLUTAMINE DUMPER 5-like
Cla97C05G098070	771	244.003	45.9668	-2.40847	5.49e-34	4.28e-32	Down	NA	NA	NA	NA	NA	SPX domain-containing protein	SPX domain-containing protein
Cla97C05G098460	924	2115.62	966.857	-1.12994	1.07e-68	1.72e-66	Down	K10144 RCHY1, PIRH2; RING finger and CHY zinc finger domain-containing protein 1 [EC:2.3.2.27]	ko04120:Ubiquitin mediated proteolysis	GO:0002039;GO:0003674;GO:0003824;GO:0004842;GO:0005102;GO:0005488;GO:0005515;GO:0008270;GO:0016740;GO:0019787;GO:0042802;GO:0042803;GO:0043167;GO:0043169;GO:0046872;GO:0046914;GO:0046983;GO:0140096;	GO:0006464;GO:0006508;GO:0006511;GO:0006807;GO:0008150;GO:0008152;GO:0009056;GO:0009057;GO:0009893;GO:0009894;GO:0009896;GO:0009987;GO:0010604;GO:0016567;GO:0019222;GO:0019538;GO:0019941;GO:0030162;GO:0030163;GO:0031323;GO:0031325;GO:0031329;GO:0031331;GO:0031396;GO:0031398;GO:0031399;GO:0031401;GO:0032268;GO:0032270;GO:0032434;GO:0032436;GO:0032446;GO:0036211;GO:0042176;GO:0043170;GO:0043412;GO:…	GO:0000151;GO:0005575;GO:0005622;GO:0005623;GO:0005634;GO:0005654;GO:0005737;GO:0005829;GO:0031974;GO:0031981;GO:0032991;GO:0043226;GO:0043227;GO:0043229;GO:0043231;GO:0043233;GO:0044422;GO:0044424;GO:0044428;GO:0044444;GO:0044446;GO:0044464;GO:0070013;GO:1902494;GO:1990234;	RING finger and CHY zinc finger domain-containing protein	CHY-type/CTCHY-type/RING-type Zinc finger protein
Cla97C05G098470	204	570.918	234.965	-1.281	6.12e-37	5.28e-35	Down	NA	NA	NA	NA	NA	NA	Unknown protein
Cla97C05G098630	279	161.983	27.8592	-2.53836	5.02e-26	3.03e-24	Down	NA	NA	NA	NA	NA	NA	Unknown protein
Cla97C05G098640	414	2622.99	567.614	-2.20877	3.96e-246	2.66e-243	Down	K13120 FAM32A; protein FAM32A	NA	NA	NA	NA	FAM32A-like	protein FAM32A-like
Cla97C05G099440	471	13126.4	387.947	-5.08027	0	0	Down	K13993 HSP20; HSP20 family protein	ko04141:Protein processing in endoplasmic reticulum	NA	NA	GO:0005575;GO:0005622;GO:0005623;GO:0005737;GO:0044424;GO:0044464;	kDa class II heat shock protein-like	17.1 kDa class II heat shock protein-like
Cla97C05G101000	1569	30.5753	6.04998	-2.34242	4.58e-06	4.93e-05	Down	NA	NA	GO:0003674;GO:0003824;GO:0004497;GO:0016491;GO:0016705;GO:0016709;	GO:0008150;GO:0008152;GO:0009058;GO:0019748;GO:0044550;GO:0055114;	GO:0005575;GO:0016020;	Cytochrome p450	cytochrome P450 CYP82D47-like
Cla97C05G101520	1413	94.08	36.1205	-1.38222	2.33e-08	3.67e-07	Down	K09843 CYP707A; (+)-abscisic acid 8'-hydroxylase [EC:1.14.14.137]	ko00906:Carotenoid biosynthesis	GO:0003674;GO:0003824;GO:0004497;GO:0010295;GO:0016491;GO:0016705;GO:0016709;	GO:0006629;GO:0006694;GO:0007275;GO:0008150;GO:0008152;GO:0008202;GO:0008610;GO:0009058;GO:0010268;GO:0010817;GO:0016125;GO:0016128;GO:0016129;GO:0016131;GO:0016132;GO:0032501;GO:0032502;GO:0042445;GO:0042446;GO:0042592;GO:0044238;GO:0048856;GO:0048878;GO:0055088;GO:0055114;GO:0065007;GO:0065008;GO:0071704;GO:1901360;GO:1901362;GO:1901576;GO:1901615;GO:1901617;	NA	Belongs to the cytochrome P450 family	abscisic acid 8'-hydroxylase 4-like
Cla97C05G101780	186	3.81506	0	-4.44819	0.0087862	0.0367201	Down	NA	NA	NA	NA	NA	NA	Unknown protein
Cla97C05G102570	348	32.5662	13.3328	-1.29634	0.00229673	0.0119798	Down	NA	NA	NA	NA	NA	NA	Unknown protein
Cla97C05G102740	714	2309.98	876.806	-1.39665	3.67e-114	9.5e-112	Down	K22883 NATA1; L-ornithine N5-acetyltransferase [EC:2.3.1.-]	NA	GO:0003674;GO:0003824;GO:0008080;GO:0016407;GO:0016410;GO:0016740;GO:0016746;GO:0016747;	GO:0001101;GO:0006082;GO:0006520;GO:0006591;GO:0006807;GO:0008150;GO:0008152;GO:0009719;GO:0009725;GO:0009753;GO:0009987;GO:0010033;GO:0019752;GO:0042221;GO:0043436;GO:0044237;GO:0044238;GO:0044281;GO:0050896;GO:0071704;GO:1901564;GO:1901605;GO:1901700;	GO:0005575;GO:0005622;GO:0005623;GO:0005737;GO:0009507;GO:0009536;GO:0043226;GO:0043227;GO:0043229;GO:0043231;GO:0044424;GO:0044444;GO:0044464;	Tyramine N-feruloyltransferase 4	N-acetyltransferase domain-containing protein
Cla97C05G103060	1020	11.8275	3.1695	-1.90022	0.0114949	0.0458389	Down	NA	NA	GO:0003674;GO:0003676;GO:0003677;GO:0003700;GO:0005488;GO:0043565;GO:0097159;GO:0140110;GO:1901363;	GO:0006355;GO:0008150;GO:0009889;GO:0010468;GO:0010556;GO:0019219;GO:0019222;GO:0031323;GO:0031326;GO:0050789;GO:0050794;GO:0051171;GO:0051252;GO:0060255;GO:0065007;GO:0080090;GO:1903506;GO:2000112;GO:2001141;GO:0008152;GO:0006139;GO:0006351;GO:0006725;GO:0006807;GO:0009058;GO:0009059;GO:0009987;GO:0010467;GO:0016070;GO:0018130;GO:0019438;GO:0032774;GO:0034641;GO:0034645;GO:0034654;GO:0043170;GO:…	GO:0005575;GO:0005622;GO:0005623;GO:0005634;GO:0043226;GO:0043227;GO:0043229;GO:0043231;GO:0044424;GO:0044464;	ZINC FINGER protein	zinc finger protein ZAT5-like
Cla97C05G103940	795	932.513	218.566	-2.09385	1.1e-112	2.76e-110	Down	NA	NA	NA	NA	NA	methyltransferase DDB_G0268948	S-adenosyl-L-methionine-dependent methyltransferases superfamily protein
Cla97C05G104280	516	292.545	121.336	-1.27085	1.51e-19	6.76e-18	Down	K14484 IAA; auxin-responsive protein IAA	ko04075:Plant hormone signal transduction	GO:0003674;GO:0003700;GO:0140110;	GO:0000003;GO:0003006;GO:0006355;GO:0007275;GO:0008150;GO:0009555;GO:0009719;GO:0009725;GO:0009733;GO:0009790;GO:0009791;GO:0009793;GO:0009889;GO:0010033;GO:0010154;GO:0010468;GO:0010556;GO:0019219;GO:0019222;GO:0022414;GO:0031323;GO:0031326;GO:0032501;GO:0032502;GO:0042221;GO:0048229;GO:0048316;GO:0048608;GO:0048731;GO:0048856;GO:0050789;GO:0050794;GO:0050896;GO:0051171;GO:0051252;GO:0060255;GO:…	NA	Aux IAA proteins are short-lived transcriptional factors that function as repressors of early auxin response genes at low auxin concentrations	Auxin-responsive protein
Cla97C05G104620	963	33.2913	14.9192	-1.16102	0.00360766	0.0175862	Down	NA	NA	NA	GO:0006725;GO:0007275;GO:0008150;GO:0008152;GO:0009058;GO:0009555;GO:0009653;GO:0009987;GO:0010208;GO:0010584;GO:0010927;GO:0016043;GO:0019438;GO:0022607;GO:0030198;GO:0032501;GO:0032502;GO:0032989;GO:0043062;GO:0044085;GO:0044237;GO:0044249;GO:0045229;GO:0048229;GO:0048646;GO:0048856;GO:0048869;GO:0071840;GO:0080110;GO:0085029;	GO:0005575;GO:0005622;GO:0005623;GO:0005737;GO:0005829;GO:0044424;GO:0044444;GO:0044464;	Tetraketide alpha-pyrone reductase 2-like	Cinnamoyl-CoA reductase 14
Cla97C05G104870	1074	457.376	206.992	-1.14565	6.62e-24	3.68e-22	Down	NA	NA	GO:0000156;GO:0003674;GO:0003676;GO:0003677;GO:0003700;GO:0005488;GO:0043565;GO:0060089;GO:0097159;GO:0140110;GO:1901363;	GO:0000160;GO:0001101;GO:0001763;GO:0006355;GO:0006950;GO:0007154;GO:0007165;GO:0007275;GO:0008150;GO:0009267;GO:0009414;GO:0009415;GO:0009605;GO:0009628;GO:0009653;GO:0009719;GO:0009725;GO:0009735;GO:0009736;GO:0009737;GO:0009755;GO:0009787;GO:0009788;GO:0009888;GO:0009889;GO:0009890;GO:0009892;GO:0009933;GO:0009966;GO:0009968;GO:0009987;GO:0009991;GO:0010014;GO:0010015;GO:0010016;GO:0010033;GO:…	GO:0005575;GO:0005622;GO:0005623;GO:0005634;GO:0043226;GO:0043227;GO:0043229;GO:0043231;GO:0044424;GO:0044464;	transcription factor	myb-like transcription factor family protein
Cla97C05G104890	1047	570.111	225.076	-1.34232	1.07e-36	9.11e-35	Down	K09287 RAV; RAV-like factor	NA	GO:0001067;GO:0003674;GO:0003676;GO:0003677;GO:0003700;GO:0005488;GO:0043565;GO:0044212;GO:0097159;GO:0140110;GO:1901363;	GO:0000003;GO:0003006;GO:0006355;GO:0007275;GO:0008150;GO:0009314;GO:0009416;GO:0009628;GO:0009648;GO:0009719;GO:0009725;GO:0009741;GO:0009791;GO:0009889;GO:0009890;GO:0009892;GO:0009909;GO:0009910;GO:0010033;GO:0010228;GO:0010468;GO:0010556;GO:0010558;GO:0010605;GO:0010629;GO:0014070;GO:0019219;GO:0019222;GO:0022414;GO:0022622;GO:0031323;GO:0031324;GO:0031326;GO:0031327;GO:0032501;GO:0032502;GO:…	GO:0005575;GO:0005622;GO:0005623;GO:0005634;GO:0043226;GO:0043227;GO:0043229;GO:0043231;GO:0044424;GO:0044464;	AP2 ERF and B3 domain-containing transcription	AP2/ERF and B3 domain-containing transcription factor RAV1-like
Cla97C05G104950	1080	3.54239	0	-4.33407	0.0125425	0.0492383	Down	NA	NA	GO:0003674;GO:0003700;GO:0140110;	GO:0006355;GO:0008150;GO:0009889;GO:0010468;GO:0010556;GO:0019219;GO:0019222;GO:0022603;GO:0031323;GO:0031326;GO:0048831;GO:0050789;GO:0050793;GO:0050794;GO:0051171;GO:0051239;GO:0051252;GO:0060255;GO:0060688;GO:0065007;GO:0080090;GO:1900618;GO:1903506;GO:1905428;GO:2000026;GO:2000032;GO:2000112;GO:2001141;GO:0008152;GO:0006139;GO:0006351;GO:0006725;GO:0006807;GO:0009058;GO:0009059;GO:0009987;GO:…	GO:0005575;GO:0005622;GO:0005623;GO:0005634;GO:0043226;GO:0043227;GO:0043229;GO:0043231;GO:0044424;GO:0044464;	TCP family transcription factor	Transcription factor TCP12-like
Cla97C05G105730	1272	206.305	93.1901	-1.14914	8.69e-12	2.11e-10	Down	K15283 SLC35E1; solute carrier family 35, member E1	NA	GO:0003674;GO:0005215;GO:0005342;GO:0008028;GO:0008509;GO:0008514;GO:0015075;GO:0015120;GO:0015144;GO:0015318;GO:0015605;GO:0022857;GO:0042879;GO:0046943;GO:0071917;GO:1901505;	GO:0006810;GO:0006811;GO:0006820;GO:0008150;GO:0008643;GO:0009314;GO:0009416;GO:0009628;GO:0009642;GO:0009643;GO:0015711;GO:0015713;GO:0015717;GO:0015718;GO:0015748;GO:0015849;GO:0034219;GO:0034220;GO:0035436;GO:0042873;GO:0046942;GO:0050896;GO:0051179;GO:0051234;GO:0055085;GO:0071702;GO:0098656;GO:1901264;GO:1903825;GO:1905039;	GO:0005575;GO:0005622;GO:0005623;GO:0005737;GO:0009507;GO:0009526;GO:0009536;GO:0009941;GO:0016020;GO:0031090;GO:0031967;GO:0031969;GO:0031975;GO:0042170;GO:0043226;GO:0043227;GO:0043229;GO:0043231;GO:0044422;GO:0044424;GO:0044434;GO:0044435;GO:0044444;GO:0044446;GO:0044464;	Triose phosphate phosphate translocator	triose phosphate/phosphate translocator, chloroplastic-like
Cla97C05G105790	525	17.424	4.11018	-2.0813	0.00115767	0.00667296	Down	K25796 YAB; plant-specific transcription factor YABBY family protein	NA	GO:0003674;GO:0003700;GO:0140110;	GO:0000003;GO:0003002;GO:0003006;GO:0006355;GO:0007275;GO:0007389;GO:0008150;GO:0009653;GO:0009791;GO:0009798;GO:0009888;GO:0009889;GO:0009908;GO:0009943;GO:0009944;GO:0009955;GO:0010022;GO:0010073;GO:0010093;GO:0010094;GO:0010254;GO:0010468;GO:0010556;GO:0010582;GO:0019219;GO:0019222;GO:0022414;GO:0031323;GO:0031326;GO:0032501;GO:0032502;GO:0048366;GO:0048367;GO:0048437;GO:0048438;GO:0048440;GO:…	NA	crabs claw	protein CRABS CLAW
Cla97C05G106250	600	1802.37	189.866	-3.24494	2.24e-278	2.06e-275	Down	NA	NA	GO:0003674;GO:0003824;GO:0004842;GO:0005488;GO:0005515;GO:0016740;GO:0019787;GO:0051787;GO:0061630;GO:0061659;GO:0140096;	GO:0000003;GO:0000209;GO:0000902;GO:0000904;GO:0003006;GO:0006464;GO:0006508;GO:0006511;GO:0006515;GO:0006807;GO:0006950;GO:0007275;GO:0008150;GO:0008152;GO:0009056;GO:0009057;GO:0009653;GO:0009791;GO:0009826;GO:0009888;GO:0009987;GO:0010026;GO:0010033;GO:0010154;GO:0010498;GO:0016043;GO:0016049;GO:0016567;GO:0019538;GO:0019941;GO:0022412;GO:0022414;GO:0030154;GO:0030163;GO:0032446;GO:0032501;GO:…	GO:0005575;GO:0005622;GO:0005623;GO:0005737;GO:0005829;GO:0044424;GO:0044444;GO:0044464;	E3 ubiquitin-protein ligase	RING-type domain-containing protein
Cla97C05G106810	396	165.604	79.5599	-1.05902	5.49e-09	9.4e-08	Down	K03671 trxA; thioredoxin 1	NA	NA	NA	NA	Belongs to the thioredoxin family	Thioredoxin h
Cla97C05G106920	1926	1492.07	677.006	-1.14054	8.21e-59	1.08e-56	Down	NA	NA	GO:0003674;GO:0003824;GO:0004672;GO:0004674;GO:0004675;GO:0004888;GO:0016301;GO:0016740;GO:0016772;GO:0016773;GO:0019199;GO:0038023;GO:0060089;GO:0140096;	GO:0006464;GO:0006468;GO:0006793;GO:0006796;GO:0006807;GO:0006810;GO:0006897;GO:0006898;GO:0006950;GO:0006952;GO:0007154;GO:0007165;GO:0007166;GO:0007167;GO:0007178;GO:0008150;GO:0008152;GO:0009595;GO:0009605;GO:0009607;GO:0009617;GO:0009987;GO:0010359;GO:0016043;GO:0016045;GO:0016192;GO:0016310;GO:0019538;GO:0022898;GO:0023052;GO:0032409;GO:0032412;GO:0032879;GO:0033036;GO:0033037;GO:0033554;GO:…	GO:0005575;GO:0005622;GO:0005623;GO:0005737;GO:0005768;GO:0005886;GO:0012505;GO:0016020;GO:0031410;GO:0031982;GO:0043226;GO:0043227;GO:0043229;GO:0044424;GO:0044444;GO:0044464;GO:0071944;GO:0097708;	LRR receptor-like serine threonine-protein kinase	Leucine-rich repeat receptor protein kinase family protein
Cla97C05G108170	1533	18.7614	4.42935	-2.082	0.000789205	0.00478838	Down	NA	NA	GO:0003674;GO:0003824;GO:0004497;GO:0016491;GO:0016705;GO:0016709;	GO:0006950;GO:0008150;GO:0008152;GO:0009058;GO:0009266;GO:0009408;GO:0009628;GO:0010286;GO:0019748;GO:0044550;GO:0050896;GO:0055114;	GO:0005575;GO:0016020;	Cytochrome p450	cytochrome P450 71B34-like
Cla97C05G108190	678	27.6948	0	-7.30868	6.85e-09	1.16e-07	Down	NA	NA	GO:0003674;GO:0003824;GO:0004497;GO:0016491;GO:0016705;GO:0016709;	GO:0006950;GO:0008150;GO:0008152;GO:0009058;GO:0009266;GO:0009408;GO:0009628;GO:0010286;GO:0019748;GO:0044550;GO:0050896;GO:0055114;	GO:0005575;GO:0016020;	Cytochrome p450	cytochrome P450 71B19-like
Cla97C05G108440	705	5277.67	427.466	-3.62549	0	0	Down	K13993 HSP20; HSP20 family protein	ko04141:Protein processing in endoplasmic reticulum	NA	NA	NA	Belongs to the small heat shock protein (HSP20) family	small heat shock protein, chloroplastic-like
Cla97C06G109690	927	455.484	28.8274	-3.98064	6.27e-99	1.36e-96	Down	NA	NA	NA	NA	NA	Myelodysplasia-myeloid leukemia factor 1-interacting protein	FUNCTIONS IN: molecular_function unknown; INVOLVED IN: biological_process unknown; LOCATED IN: cellular_component unknown; EXPRESSED IN: inflorescence meristem, flower, cultured cell; EXPRESSED DURING: petal differentiation and expansion stage; BEST Arabidopsis thaliana protein match is: glycine-rich protein .
Cla97C06G110600	354	97.7507	16.7707	-2.53822	2.65e-16	9.51e-15	Down	NA	NA	NA	NA	NA	Protein of unknown function (DUF861)	RmlC-like cupins superfamily protein
Cla97C06G111050	432	2163.19	1068.4	-1.01672	5.2e-59	6.91e-57	Down	NA	NA	NA	GO:0007623;GO:0008150;GO:0009314;GO:0009416;GO:0009628;GO:0009987;GO:0048511;GO:0050896;GO:0051716;GO:0071214;GO:0071478;GO:0071482;GO:0104004;	GO:0005575;GO:0005622;GO:0005623;GO:0005737;GO:0009507;GO:0009526;GO:0009532;GO:0009534;GO:0009535;GO:0009536;GO:0009570;GO:0009579;GO:0009941;GO:0016020;GO:0031967;GO:0031975;GO:0031976;GO:0031984;GO:0032991;GO:0034357;GO:0042651;GO:0043226;GO:0043227;GO:0043229;GO:0043231;GO:0044422;GO:0044424;GO:0044425;GO:0044434;GO:0044435;GO:0044436;GO:0044444;GO:0044446;GO:0044464;GO:0055035;GO:0098796;GO:…	Light-regulated	light-regulated protein-like
Cla97C06G111340	756	14.8025	0	-6.40676	1.52e-06	1.79e-05	Down	NA	NA	NA	NA	NA	NA	Unknown protein
Cla97C06G111600	528	500.816	157.575	-1.66893	3.9e-46	4.21e-44	Down	NA	NA	GO:0003674;GO:0003676;GO:0003677;GO:0005488;GO:0005515;GO:0019904;GO:0097159;GO:1901363;	GO:0001101;GO:0006091;GO:0008150;GO:0008152;GO:0009719;GO:0009725;GO:0009737;GO:0009767;GO:0009773;GO:0009987;GO:0010033;GO:0015979;GO:0019684;GO:0022900;GO:0033993;GO:0042221;GO:0044237;GO:0050896;GO:0055114;GO:0097305;GO:1901700;	GO:0000229;GO:0005575;GO:0005622;GO:0005623;GO:0005694;GO:0005737;GO:0009295;GO:0009507;GO:0009508;GO:0009521;GO:0009522;GO:0009526;GO:0009532;GO:0009534;GO:0009535;GO:0009536;GO:0009579;GO:0009941;GO:0016020;GO:0030093;GO:0031967;GO:0031975;GO:0031976;GO:0031984;GO:0032991;GO:0034357;GO:0042646;GO:0042651;GO:0043226;GO:0043227;GO:0043228;GO:0043229;GO:0043231;GO:0043232;GO:0044422;GO:0044424;GO:…	Thylakoid membrane phosphoprotein 14 kDa	protein CURVATURE THYLAKOID 1B, chloroplastic
Cla97C06G111740	258	9.00186	0	-5.68726	6.29e-05	0.000526541	Down	NA	NA	NA	NA	NA	pollen allergen Ole e 6-like	major pollen allergen Ole e 6-like
Cla97C06G111760	258	10.9394	0.644062	-4.1114	0.00095112	0.00562864	Down	NA	NA	NA	NA	NA	pollen allergen Ole e 6-like	major pollen allergen Ole e 6-like
Cla97C06G112380	396	208.575	85.206	-1.29181	2.18e-14	6.74e-13	Down	NA	NA	NA	NA	NA	BEST Arabidopsis thaliana protein match is	Unknown protein
Cla97C06G112700	3756	3105	1311.44	-1.24362	4.27e-135	1.31e-132	Down	NA	NA	GO:0003674;GO:0005488;GO:0005515;GO:0005516;	GO:0000003;GO:0000302;GO:0002376;GO:0003006;GO:0006457;GO:0006914;GO:0006950;GO:0006952;GO:0006955;GO:0006979;GO:0007275;GO:0008150;GO:0008152;GO:0009056;GO:0009266;GO:0009314;GO:0009408;GO:0009416;GO:0009605;GO:0009607;GO:0009620;GO:0009628;GO:0009636;GO:0009642;GO:0009644;GO:0009791;GO:0009814;GO:0009817;GO:0009893;GO:0009894;GO:0009896;GO:0009987;GO:0010035;GO:0010228;GO:0010506;GO:0010508;GO:…	GO:0005575;GO:0005911;GO:0009506;GO:0030054;GO:0055044;	BAG family molecular chaperone regulator	BAG family molecular chaperone regulator 6
Cla97C06G113120	1071	13.9638	3.15457	-2.14112	0.00355875	0.0173687	Down	NA	NA	NA	NA	NA	Glutelin type-A	glutelin type-D 1-like
Cla97C06G113280	741	3.92475	0	-4.47969	0.00855542	0.0359192	Down	NA	NA	NA	NA	NA	NA	Unknown protein
Cla97C06G114170	2340	852.212	238.424	-1.83702	2.23e-81	4.12e-79	Down	NA	NA	GO:0003674;GO:0003824;GO:0004553;GO:0016787;GO:0016798;GO:0046556;	GO:0000003;GO:0003006;GO:0007275;GO:0008150;GO:0009791;GO:0010154;GO:0010214;GO:0022414;GO:0032501;GO:0032502;GO:0048316;GO:0048608;GO:0048731;GO:0048856;GO:0061458;	GO:0005575;GO:0005576;GO:0005618;GO:0005623;GO:0009505;GO:0030312;GO:0044464;GO:0048046;GO:0071944;	beta-D-xylosidase	beta-D-xylosidase 1-like
Cla97C06G114240	411	13.6829	0.635165	-4.43742	0.000237311	0.00168913	Down	NA	NA	NA	NA	NA	ZINC FINGER protein	zinc finger protein 6-like
Cla97C06G114450	1713	32.0483	9.52974	-1.75585	0.000117415	0.0009137	Down	K01051 E3.1.1.11; pectinesterase [EC:3.1.1.11]	ko00040:Pentose and glucuronate interconversions	GO:0003674;GO:0003824;GO:0004857;GO:0016787;GO:0016788;GO:0030234;GO:0030599;GO:0046910;GO:0052689;GO:0098772;	GO:0008150;GO:0043086;GO:0044092;GO:0050790;GO:0065007;GO:0065009;	GO:0005575;GO:0005623;GO:0044464;GO:0071944;	Acts in the modification of cell walls via demethylesterification of cell wall pectin	Pectinesterase
Cla97C06G114820	309	58.8046	28.5289	-1.04121	0.00051555	0.00329959	Down	K03676 grxC, GLRX, GLRX2; glutaredoxin 3	NA	NA	NA	NA	Monothiol	Glutaredoxin
Cla97C06G115060	1461	117.235	47.9	-1.29494	5.83e-09	9.96e-08	Down	K03444 ERD6, ESL1; MFS transporter, SP family, ERD6-like sugar transporter	NA	GO:0003674;GO:0005215;GO:0005351;GO:0005355;GO:0005402;GO:0008324;GO:0015075;GO:0015077;GO:0015078;GO:0015144;GO:0015145;GO:0015149;GO:0015291;GO:0015293;GO:0015294;GO:0015295;GO:0015318;GO:0022804;GO:0022857;GO:0022890;GO:0051119;	GO:0006810;GO:0006811;GO:0006812;GO:0008150;GO:0008643;GO:0008645;GO:0015672;GO:0015749;GO:0034219;GO:0034220;GO:0046323;GO:0051179;GO:0051234;GO:0055085;GO:0071702;GO:0098655;GO:0098660;GO:0098662;GO:1902600;GO:1904659;	NA	Belongs to the major facilitator superfamily. Sugar transporter (TC 2.A.1.1) family	sugar transporter ERD6-like 16
Cla97C06G115580	774	383.887	163.041	-1.23489	1.62e-22	8.38e-21	Down	K07025 K07025; putative hydrolase of the HAD superfamily	NA	NA	NA	NA	HAD-hyrolase-like	Haloacid dehalogenase-like hydrolase (HAD) superfamily protein
Cla97C06G116550	699	30.5562	7.27968	-2.06478	2.48e-05	0.000228211	Down	K14516 ERF1; ethylene-responsive transcription factor 1	ko04016:MAPK signaling pathway - plant|ko04075:Plant hormone signal transduction	GO:0003674;GO:0003676;GO:0003677;GO:0003700;GO:0005488;GO:0097159;GO:0140110;GO:1901363;	GO:0000160;GO:0001101;GO:0006355;GO:0006950;GO:0006952;GO:0007154;GO:0007165;GO:0008150;GO:0009719;GO:0009723;GO:0009725;GO:0009753;GO:0009755;GO:0009867;GO:0009873;GO:0009889;GO:0009987;GO:0010033;GO:0010468;GO:0010556;GO:0019219;GO:0019222;GO:0023052;GO:0031323;GO:0031326;GO:0032870;GO:0035556;GO:0042221;GO:0050789;GO:0050794;GO:0050896;GO:0051171;GO:0051252;GO:0051716;GO:0060255;GO:0065007;GO:…	GO:0005575;GO:0005622;GO:0005623;GO:0005634;GO:0043226;GO:0043227;GO:0043229;GO:0043231;GO:0044424;GO:0044464;	ethylene-responsive transcription factor	ethylene-responsive transcription factor 1B-like
Cla97C06G116590	231	3.54239	0	-4.33407	0.0125425	0.0492383	Down	NA	NA	NA	NA	NA	NA	Unknown protein
Cla97C06G117620	1092	8.74286	0	-5.64177	7.62e-05	0.000622548	Down	K24544 CYP714C; cytochrome P450 family 714 subfamily C	NA	GO:0003674;GO:0003824;GO:0004497;GO:0016491;	GO:0006629;GO:0008150;GO:0008152;GO:0008202;GO:0010268;GO:0010817;GO:0016128;GO:0016131;GO:0042445;GO:0042592;GO:0044238;GO:0048878;GO:0055088;GO:0055114;GO:0065007;GO:0065008;GO:0071704;GO:1901360;GO:1901615;	NA	Cytochrome p450	cytochrome P450 714C2-like
Cla97C06G118420	1416	16.721	3.16791	-2.39951	0.000908021	0.00541007	Down	K01369 LGMN; legumain [EC:3.4.22.34]	NA	NA	NA	NA	Vacuolar-processing enzyme-like	Vacuolar-processing enzyme
Cla97C06G119170	699	738.636	149.622	-2.30409	1.56e-103	3.53e-101	Down	K25079 RBM42; RNA-binding protein 42	NA	NA	NA	NA	RNA-binding protein	RNA-binding protein 42-like
Cla97C06G119580	438	119.481	45.5959	-1.39147	7.26e-10	1.41e-08	Down	NA	NA	NA	NA	NA	Heavy-metal-associated domain	Heavy metal-associated domain containing protein
Cla97C06G119700	543	118.517	57.3275	-1.04545	8.58e-07	1.06e-05	Down	K14484 IAA; auxin-responsive protein IAA	ko04075:Plant hormone signal transduction	NA	GO:0008150;GO:0009719;GO:0009725;GO:0009733;GO:0010033;GO:0042221;GO:0050896;	NA	Aux IAA proteins are short-lived transcriptional factors that function as repressors of early auxin response genes at low auxin concentrations	Auxin-responsive protein
Cla97C06G120270	1743	4567.73	1962.61	-1.21887	2.43e-167	1.04e-164	Down	NA	NA	NA	GO:0001101;GO:0006950;GO:0008150;GO:0009611;GO:0009719;GO:0009725;GO:0009753;GO:0010033;GO:0042221;GO:0050896;GO:1901700;	NA	Protein NRT1 PTR FAMILY	Protein NRT1/ PTR FAMILY 6.2-like
Cla97C06G120510	501	15.9426	0	-6.51158	8.47e-07	1.04e-05	Down	NA	NA	NA	GO:0002239;GO:0006810;GO:0006811;GO:0006812;GO:0006950;GO:0006979;GO:0008150;GO:0009266;GO:0009314;GO:0009409;GO:0009416;GO:0009605;GO:0009607;GO:0009628;GO:0009642;GO:0009646;GO:0009889;GO:0009987;GO:0015690;GO:0019222;GO:0030001;GO:0031323;GO:0031326;GO:0033554;GO:0043207;GO:0043455;GO:0050789;GO:0050794;GO:0050896;GO:0051179;GO:0051234;GO:0051704;GO:0051707;GO:0051716;GO:0065007;GO:0070417;GO:…	GO:0005575;GO:0005622;GO:0005623;GO:0005737;GO:0005773;GO:0005886;GO:0016020;GO:0031224;GO:0031225;GO:0031226;GO:0043226;GO:0043227;GO:0043229;GO:0043231;GO:0044424;GO:0044425;GO:0044444;GO:0044459;GO:0044464;GO:0046658;GO:0071944;	Plastocyanin-like domain	umecyanin-like
Cla97C06G120520	468	28.5226	9.14484	-1.63336	0.00113313	0.00654273	Down	NA	NA	NA	GO:0002239;GO:0006810;GO:0006811;GO:0006812;GO:0006950;GO:0006979;GO:0008150;GO:0009266;GO:0009314;GO:0009409;GO:0009416;GO:0009605;GO:0009607;GO:0009628;GO:0009642;GO:0009646;GO:0009889;GO:0009987;GO:0015690;GO:0019222;GO:0030001;GO:0031323;GO:0031326;GO:0033554;GO:0043207;GO:0043455;GO:0050789;GO:0050794;GO:0050896;GO:0051179;GO:0051234;GO:0051704;GO:0051707;GO:0051716;GO:0065007;GO:0070417;GO:…	GO:0005575;GO:0005622;GO:0005623;GO:0005737;GO:0005773;GO:0005886;GO:0016020;GO:0031224;GO:0031225;GO:0031226;GO:0043226;GO:0043227;GO:0043229;GO:0043231;GO:0044424;GO:0044425;GO:0044444;GO:0044459;GO:0044464;GO:0046658;GO:0071944;	Plastocyanin-like domain	cucumber peeling cupredoxin-like
Cla97C06G121320	2856	32.8625	15.5629	-1.0779	0.00793685	0.0338502	Down	K01535 PMA1, PMA2; H+-transporting ATPase [EC:7.1.2.1]	ko00190:Oxidative phosphorylation	NA	NA	GO:0005575;GO:0005623;GO:0005886;GO:0016020;GO:0044464;GO:0071944;	ATPase 8, plasma	Plasma membrane ATPase
Cla97C06G121400	555	1300.96	63.65	-4.35155	1.2e-267	9.67e-265	Down	K03098 APOD; apolipoprotein D and lipocalin family protein	NA	NA	NA	GO:0005575;GO:0005623;GO:0009279;GO:0016020;GO:0019867;GO:0030312;GO:0030313;GO:0031975;GO:0044462;GO:0044464;GO:0071944;	Belongs to the calycin superfamily. Lipocalin family	temperature-induced lipocalin-1
Cla97C06G122110	1131	197.588	65.6275	-1.59	2.32e-19	1.02e-17	Down	NA	NA	GO:0003674;GO:0005215;GO:0022857;	GO:0006810;GO:0007154;GO:0007165;GO:0008150;GO:0009719;GO:0009725;GO:0009733;GO:0009734;GO:0009755;GO:0009987;GO:0010033;GO:0023052;GO:0032870;GO:0042221;GO:0050789;GO:0050794;GO:0050896;GO:0051179;GO:0051234;GO:0051716;GO:0055085;GO:0065007;GO:0070887;GO:0071310;GO:0071365;GO:0071495;	GO:0005575;GO:0005622;GO:0005623;GO:0005737;GO:0005886;GO:0005887;GO:0005938;GO:0016020;GO:0016021;GO:0031224;GO:0031226;GO:0044424;GO:0044425;GO:0044444;GO:0044459;GO:0044464;GO:0071944;GO:0099568;	WAT1-related protein	WAT1-related protein
Cla97C06G123120	738	207.635	86.8891	-1.25694	5.22e-14	1.56e-12	Down	NA	NA	GO:0003674;GO:0003700;GO:0140110;	GO:0006355;GO:0008150;GO:0009889;GO:0010468;GO:0010556;GO:0019219;GO:0019222;GO:0031323;GO:0031326;GO:0050789;GO:0050794;GO:0051171;GO:0051252;GO:0060255;GO:0065007;GO:0080090;GO:1903506;GO:2000112;GO:2001141;GO:0008152;GO:0006139;GO:0006351;GO:0006725;GO:0006807;GO:0009058;GO:0009059;GO:0009987;GO:0010467;GO:0016070;GO:0018130;GO:0019438;GO:0032774;GO:0034641;GO:0034645;GO:0034654;GO:0043170;GO:…	NA	transcription factor	Basic helix-loop-helix transcription factor
Cla97C06G123440	738	2921.21	1221.15	-1.25844	2.72e-137	8.87e-135	Down	NA	NA	NA	NA	NA	NA	STE20-like serine/threonine-protein kinase
Cla97C06G124390	630	292.433	123.235	-1.24446	5.69e-18	2.32e-16	Down	NA	NA	NA	NA	NA	protein kinase activity	Unknown protein
Cla97C06G125980	1866	509.787	152.332	-1.74312	1.12e-49	1.26e-47	Down	K14638 SLC15A3_4, PHT; solute carrier family 15 (peptide/histidine transporter), member 3/4	NA	GO:0003674;GO:0005215;GO:0005319;GO:0005342;GO:0008028;GO:0008509;GO:0008514;GO:0015075;GO:0015318;GO:0015665;GO:0022857;GO:0046943;GO:0090440;GO:1901618;	GO:0006810;GO:0006811;GO:0006820;GO:0006869;GO:0008150;GO:0009605;GO:0009607;GO:0009624;GO:0010119;GO:0010876;GO:0015711;GO:0015718;GO:0015849;GO:0015850;GO:0033036;GO:0034220;GO:0043207;GO:0046864;GO:0046865;GO:0046942;GO:0050789;GO:0050794;GO:0050896;GO:0051179;GO:0051234;GO:0051704;GO:0051707;GO:0055085;GO:0065007;GO:0071702;GO:0080168;GO:0098656;GO:1903825;GO:1905039;GO:0009987;GO:0010118;	GO:0005575;GO:0005623;GO:0005886;GO:0016020;GO:0044464;GO:0071944;	Nitrate transporter	protein NRT1/ PTR FAMILY 4.6-like
Cla97C06G126070	1629	229.83	84.4955	-1.44445	7.37e-17	2.76e-15	Down	NA	NA	NA	NA	NA	Nodulin-like	protein NUCLEAR FUSION DEFECTIVE 4
Cla97C06G126960	801	211.503	85.9091	-1.29696	3.97e-14	1.2e-12	Down	NA	NA	NA	NA	NA	NA	VARLMGL domain-containing protein
Cla97C06G127630	516	41.1751	19.9716	-1.0429	0.00310916	0.0154695	Down	NA	NA	NA	NA	NA	Protein SHOOT GRAVITROPISM	protein indeterminate-domain 16
Cla97C07G130010	867	11.2617	2.19737	-2.34523	0.00731463	0.0316242	Down	NA	NA	NA	NA	NA	Carbohydrate esterase	SASA domain-containing protein
Cla97C07G130500	840	25.9079	8.60814	-1.59162	0.00287521	0.0145022	Down	NA	NA	NA	NA	NA	PDDEXK-like family of unknown function	Protein of unknown function (DUF506)
Cla97C07G130840	255	31.4552	5.364	-2.5504	1.87e-06	2.18e-05	Down	NA	NA	NA	NA	NA	NA	Unknown protein
Cla97C07G131170	924	569.718	209.389	-1.44258	4.05e-37	3.52e-35	Down	NA	NA	NA	NA	NA	PDDEXK-like family of unknown function	Protein of unknown function (DUF506)
Cla97C07G131350	366	12.7621	2.86398	-2.1633	0.00437649	0.0205546	Down	NA	NA	GO:0003674;GO:0005198;GO:0005488;GO:0005515;GO:0030276;GO:0032050;	GO:0006810;GO:0006897;GO:0006898;GO:0008150;GO:0016192;GO:0051179;GO:0051234;GO:0072583;GO:0098657;	GO:0005575;GO:0005622;GO:0005623;GO:0005737;GO:0005829;GO:0005886;GO:0012506;GO:0016020;GO:0030117;GO:0030118;GO:0030120;GO:0030125;GO:0030135;GO:0030136;GO:0030659;GO:0030662;GO:0030665;GO:0031090;GO:0031410;GO:0031982;GO:0032991;GO:0043226;GO:0043227;GO:0043229;GO:0044422;GO:0044424;GO:0044425;GO:0044433;GO:0044444;GO:0044446;GO:0044464;GO:0048475;GO:0071944;GO:0097708;GO:0098588;GO:0098796;GO:…	CAAX protease self-immunity	Unknown protein
Cla97C07G131360	2904	15.7318	0	-6.48935	1.06e-06	1.28e-05	Down	NA	NA	NA	NA	NA	ADP binding	Disease resistance protein
Cla97C07G131530	1155	143.825	61.3402	-1.22591	4.65e-09	8.05e-08	Down	NA	NA	GO:0003674;GO:0005215;GO:0005342;GO:0008324;GO:0008509;GO:0008514;GO:0015075;GO:0015171;GO:0015175;GO:0015179;GO:0015186;GO:0015238;GO:0015318;GO:0022857;GO:0046943;	GO:0000003;GO:0001504;GO:0001505;GO:0003006;GO:0003333;GO:0006810;GO:0006811;GO:0006812;GO:0006820;GO:0006835;GO:0006836;GO:0006855;GO:0006865;GO:0006868;GO:0007154;GO:0007165;GO:0007275;GO:0008150;GO:0009719;GO:0009725;GO:0009733;GO:0009734;GO:0009755;GO:0009791;GO:0009987;GO:0010033;GO:0010154;GO:0015711;GO:0015800;GO:0015804;GO:0015807;GO:0015813;GO:0015849;GO:0015893;GO:0022414;GO:0023052;GO:…	GO:0005575;GO:0005622;GO:0005623;GO:0005737;GO:0005886;GO:0005887;GO:0005938;GO:0016020;GO:0016021;GO:0031224;GO:0031226;GO:0044424;GO:0044425;GO:0044444;GO:0044459;GO:0044464;GO:0071944;GO:0099568;	WAT1-related protein	WAT1-related protein
Cla97C07G131830	822	52.638	25.0104	-1.07795	0.00112437	0.00650329	Down	NA	NA	NA	NA	NA	Transcription factor that specifically binds AT-rich DNA sequences related to the nuclear matrix attachment regions (MARs)	AT-hook motif nuclear-localized protein
Cla97C07G132100	345	14.2023	0.623104	-4.49084	0.000167996	0.00124037	Down	K03671 trxA; thioredoxin 1	NA	NA	NA	NA	Belongs to the thioredoxin family	Thioredoxin
Cla97C07G132150	480	6116.01	260.334	-4.55308	0	0	Down	K13993 HSP20; HSP20 family protein	ko04141:Protein processing in endoplasmic reticulum	NA	NA	NA	Belongs to the small heat shock protein (HSP20) family	17.8 kDa class I heat shock protein-like
Cla97C07G132180	465	304.461	19.0354	-3.99999	1.06e-68	1.71e-66	Down	K13993 HSP20; HSP20 family protein	ko04141:Protein processing in endoplasmic reticulum	NA	NA	NA	Belongs to the small heat shock protein (HSP20) family	17.8 kDa class I heat shock protein-like
Cla97C07G132190	480	6149.3	492.718	-3.64118	0	0	Down	K13993 HSP20; HSP20 family protein	ko04141:Protein processing in endoplasmic reticulum	NA	NA	NA	Belongs to the small heat shock protein (HSP20) family	17.8 kDa class I heat shock protein-like
Cla97C07G132200	315	41.009	3.14854	-3.69928	2.53e-10	5.22e-09	Down	NA	NA	NA	NA	NA	NA	Unknown protein
Cla97C07G132220	480	2336.58	359.838	-2.69985	7.64e-293	7.35e-290	Down	K13993 HSP20; HSP20 family protein	ko04141:Protein processing in endoplasmic reticulum	NA	NA	NA	Belongs to the small heat shock protein (HSP20) family	17.8 kDa class I heat shock protein-like
Cla97C07G132280	480	1453.64	276.318	-2.3949	2.39e-190	1.12e-187	Down	K13993 HSP20; HSP20 family protein	ko04141:Protein processing in endoplasmic reticulum	NA	NA	NA	Belongs to the small heat shock protein (HSP20) family	17.8 kDa class I heat shock protein-like
Cla97C07G132300	480	6174.89	499.019	-3.62882	0	0	Down	K13993 HSP20; HSP20 family protein	ko04141:Protein processing in endoplasmic reticulum	NA	NA	NA	Belongs to the small heat shock protein (HSP20) family	17.8 kDa class I heat shock protein-like
Cla97C07G132310	465	299.778	18.7222	-4.00201	3.2e-67	4.94e-65	Down	K13993 HSP20; HSP20 family protein	ko04141:Protein processing in endoplasmic reticulum	NA	NA	NA	Belongs to the small heat shock protein (HSP20) family	17.8 kDa class I heat shock protein-like
Cla97C07G133490	252	20.2977	3.15743	-2.67908	9.5e-05	0.000758166	Down	NA	NA	NA	NA	NA	pollen allergen Ole e 6-like	major pollen allergen Ole e 6-like
Cla97C07G133620	207	118.53	39.296	-1.59224	2.29e-09	4.15e-08	Down	NA	NA	NA	NA	GO:0005575;GO:0005622;GO:0005623;GO:0005737;GO:0005739;GO:0005740;GO:0005743;GO:0016020;GO:0019866;GO:0031090;GO:0031966;GO:0031967;GO:0031975;GO:0043226;GO:0043227;GO:0043229;GO:0043231;GO:0044422;GO:0044424;GO:0044429;GO:0044444;GO:0044446;GO:0044464;	Ubiquinol-cytochrome c reductase complex 6.7 kDa	ubiquinol-cytochrome c reductase complex 6.7 kDa protein
Cla97C07G135740	318	130.32	9.81114	-3.72675	2.94e-29	1.99e-27	Down	NA	NA	GO:0001786;GO:0003674;GO:0005488;GO:0005507;GO:0005543;GO:0008289;GO:0016151;GO:0035091;GO:0043167;GO:0043168;GO:0043169;GO:0046872;GO:0046914;GO:0070300;GO:0072341;GO:1901611;	GO:0001101;GO:0006950;GO:0008150;GO:0009266;GO:0009409;GO:0009414;GO:0009415;GO:0009628;GO:0009631;GO:0009719;GO:0009725;GO:0009737;GO:0009961;GO:0010033;GO:0010035;GO:0010243;GO:0033993;GO:0042221;GO:0043200;GO:0050896;GO:0097305;GO:1901698;GO:1901700;	GO:0005575;GO:0005622;GO:0005623;GO:0005737;GO:0005829;GO:0012506;GO:0016020;GO:0031090;GO:0031982;GO:0043226;GO:0043227;GO:0044422;GO:0044424;GO:0044444;GO:0044464;	Belongs to the plant dehydrin family	Dehydrin DHN1
Cla97C07G135750	546	93.4127	10.1738	-3.2016	3.78e-20	1.73e-18	Down	NA	NA	GO:0001786;GO:0003674;GO:0005488;GO:0005507;GO:0005543;GO:0008289;GO:0016151;GO:0035091;GO:0043167;GO:0043168;GO:0043169;GO:0046872;GO:0046914;GO:0070300;GO:0072341;GO:1901611;	GO:0001101;GO:0006950;GO:0008150;GO:0009266;GO:0009409;GO:0009414;GO:0009415;GO:0009628;GO:0009631;GO:0009719;GO:0009725;GO:0009737;GO:0009961;GO:0010033;GO:0010035;GO:0010243;GO:0033993;GO:0042221;GO:0043200;GO:0050896;GO:0097305;GO:1901698;GO:1901700;	GO:0005575;GO:0005622;GO:0005623;GO:0005737;GO:0005829;GO:0012506;GO:0016020;GO:0031090;GO:0031982;GO:0043226;GO:0043227;GO:0044422;GO:0044424;GO:0044444;GO:0044464;	Belongs to the plant dehydrin family	dehydrin DHN1
Cla97C07G136500	441	7.96446	0	-5.51063	0.000142912	0.00107804	Down	NA	NA	NA	NA	NA	NA	Unknown protein
Cla97C07G136770	894	59.302	21.8587	-1.43868	4.16e-06	4.52e-05	Down	NA	NA	NA	NA	NA	Protein trichome birefringence-like 42	protein trichome birefringence-like 42
Cla97C07G137000	1320	1697.18	801.194	-1.08229	1.31e-66	2e-64	Down	NA	NA	NA	GO:0006810;GO:0006833;GO:0008150;GO:0042044;GO:0051179;GO:0051234;	GO:0005575;GO:0005576;GO:0005618;GO:0005622;GO:0005623;GO:0005737;GO:0005773;GO:0005774;GO:0005794;GO:0005829;GO:0009505;GO:0012505;GO:0016020;GO:0030312;GO:0031090;GO:0043226;GO:0043227;GO:0043229;GO:0043231;GO:0044422;GO:0044424;GO:0044437;GO:0044444;GO:0044446;GO:0044464;GO:0048046;GO:0071944;GO:0098588;GO:0098805;	Epidermis-specific secreted glycoprotein	Epidermis-specific secreted glycoprotein EP1-like
Cla97C07G137160	1041	71.5805	9.18804	-2.9602	2.03e-15	6.69e-14	Down	K04125 GA2ox; gibberellin 2beta-dioxygenase [EC:1.14.11.13]	ko00904:Diterpenoid biosynthesis	GO:0003674;GO:0003824;GO:0016491;GO:0016705;GO:0016706;GO:0045543;GO:0051213;GO:0052634;	GO:0006082;GO:0006629;GO:0006720;GO:0006721;GO:0008150;GO:0008152;GO:0008300;GO:0009056;GO:0009314;GO:0009416;GO:0009628;GO:0009685;GO:0009987;GO:0010817;GO:0016042;GO:0016054;GO:0016101;GO:0016103;GO:0016115;GO:0019752;GO:0042445;GO:0042447;GO:0043436;GO:0044237;GO:0044238;GO:0044242;GO:0044248;GO:0044255;GO:0044281;GO:0044282;GO:0045487;GO:0046395;GO:0050896;GO:0055114;GO:0065007;GO:0065008;GO:…	NA	Belongs to the iron ascorbate-dependent oxidoreductase family	gibberellin 2-beta-dioxygenase 1
Cla97C07G137260	1737	112.171	49.492	-1.18377	8.72e-08	1.28e-06	Down	K09840 NCED; 9-cis-epoxycarotenoid dioxygenase [EC:1.13.11.51]	ko00906:Carotenoid biosynthesis	GO:0003674;GO:0003824;GO:0010436;GO:0016491;GO:0016701;GO:0016702;GO:0045549;GO:0051213;	GO:0000003;GO:0001101;GO:0003006;GO:0006066;GO:0006082;GO:0006629;GO:0006714;GO:0006720;GO:0006721;GO:0006950;GO:0006970;GO:0006972;GO:0007275;GO:0008150;GO:0008152;GO:0008299;GO:0008610;GO:0009058;GO:0009414;GO:0009415;GO:0009628;GO:0009651;GO:0009687;GO:0009688;GO:0009791;GO:0009987;GO:0010035;GO:0010154;GO:0010162;GO:0010431;GO:0016053;GO:0016106;GO:0016114;GO:0019752;GO:0021700;GO:0022414;GO:…	GO:0005575;GO:0005622;GO:0005623;GO:0005737;GO:0009507;GO:0009532;GO:0009534;GO:0009535;GO:0009536;GO:0009570;GO:0009579;GO:0016020;GO:0031976;GO:0031984;GO:0034357;GO:0042651;GO:0043226;GO:0043227;GO:0043229;GO:0043231;GO:0044422;GO:0044424;GO:0044434;GO:0044435;GO:0044436;GO:0044444;GO:0044446;GO:0044464;GO:0055035;	9-cis-epoxycarotenoid dioxygenase	9-cis-epoxycarotenoid dioxygenase
Cla97C07G137340	660	674.413	78.148	-3.11177	8.2e-110	1.99e-107	Down	K00799 GST, gst; glutathione S-transferase [EC:2.5.1.18]	ko00480:Glutathione metabolism	GO:0003674;GO:0003824;GO:0004364;GO:0005488;GO:0005515;GO:0016740;GO:0016765;GO:0019899;GO:0033218;GO:0042277;GO:0043167;GO:0043168;GO:0043295;GO:0048037;GO:0072341;GO:1900750;GO:1901681;	GO:0001101;GO:0006518;GO:0006575;GO:0006725;GO:0006749;GO:0006790;GO:0006807;GO:0006950;GO:0006979;GO:0007154;GO:0008150;GO:0008152;GO:0009056;GO:0009266;GO:0009404;GO:0009407;GO:0009409;GO:0009414;GO:0009415;GO:0009605;GO:0009628;GO:0009635;GO:0009636;GO:0009719;GO:0009725;GO:0009735;GO:0009987;GO:0009991;GO:0010033;GO:0010035;GO:0010038;GO:0018973;GO:0018974;GO:0019326;GO:0019439;GO:0019748;GO:…	GO:0005575;GO:0005576;GO:0005622;GO:0005623;GO:0005634;GO:0005737;GO:0005773;GO:0005774;GO:0005829;GO:0005886;GO:0009507;GO:0009532;GO:0009536;GO:0009570;GO:0016020;GO:0031090;GO:0043226;GO:0043227;GO:0043229;GO:0043231;GO:0044422;GO:0044424;GO:0044434;GO:0044435;GO:0044437;GO:0044444;GO:0044446;GO:0044464;GO:0048046;GO:0071944;GO:0098588;GO:0098805;	Glutathione S-transferase	Glutathione S-transferase
Cla97C07G137350	1428	55.1786	25.3178	-1.12447	0.000418434	0.00274416	Down	NA	NA	GO:0003674;GO:0003824;GO:0004672;GO:0004674;GO:0016301;GO:0016740;GO:0016772;GO:0016773;GO:0140096;	GO:0000003;GO:0003006;GO:0006464;GO:0006468;GO:0006793;GO:0006796;GO:0006807;GO:0006810;GO:0007154;GO:0007165;GO:0007275;GO:0008150;GO:0008152;GO:0009790;GO:0009791;GO:0009793;GO:0009914;GO:0009926;GO:0009987;GO:0010154;GO:0010817;GO:0016310;GO:0019538;GO:0022414;GO:0023052;GO:0032501;GO:0032502;GO:0035556;GO:0036211;GO:0043170;GO:0043412;GO:0044237;GO:0044238;GO:0044260;GO:0044267;GO:0048316;GO:…	GO:0005575;GO:0005622;GO:0005623;GO:0005634;GO:0005737;GO:0005886;GO:0016020;GO:0043226;GO:0043227;GO:0043229;GO:0043231;GO:0044424;GO:0044464;GO:0071944;	Serine threonine-protein kinase	serine/threonine-protein kinase WAG1
Cla97C07G139260	1122	26.2682	8.87491	-1.56882	0.00123429	0.0070542	Down	NA	NA	NA	GO:0000003;GO:0003006;GO:0006935;GO:0007275;GO:0008150;GO:0009553;GO:0009555;GO:0009605;GO:0009791;GO:0009856;GO:0009908;GO:0010183;GO:0022414;GO:0032501;GO:0032502;GO:0040011;GO:0042221;GO:0042330;GO:0044706;GO:0048229;GO:0048367;GO:0048437;GO:0048438;GO:0048443;GO:0048466;GO:0048608;GO:0048731;GO:0048827;GO:0048856;GO:0048868;GO:0050896;GO:0050918;GO:0051704;GO:0061458;GO:0090567;GO:0099402;	NA	SNF1-related protein kinase regulatory subunit gamma-like	SNF1-related protein kinase regulatory subunit gamma-like PV42a
Cla97C07G139290	189	62.6717	10.4612	-2.58513	3.77e-12	9.44e-11	Down	K20416 FAD5; palmitoyl-[glycerolipid] 7-desaturase [EC:1.14.19.42]	NA	NA	NA	NA	Palmitoyl-monogalactosyldiacylglycerol delta-7 desaturase, chloroplastic-like	Delta 9 desaturase
Cla97C07G139300	723	644.197	53.3043	-3.597	3.4e-135	1.06e-132	Down	K20416 FAD5; palmitoyl-[glycerolipid] 7-desaturase [EC:1.14.19.42]	NA	GO:0003674;GO:0003824;GO:0016491;	GO:0000038;GO:0006082;GO:0006629;GO:0006631;GO:0006633;GO:0006636;GO:0008150;GO:0008152;GO:0008610;GO:0009058;GO:0009987;GO:0016053;GO:0019752;GO:0032787;GO:0033559;GO:0042761;GO:0043436;GO:0044237;GO:0044238;GO:0044249;GO:0044255;GO:0044281;GO:0044283;GO:0046394;GO:0055114;GO:0071704;GO:0072330;GO:1901576;	GO:0005575;GO:0005622;GO:0005623;GO:0005737;GO:0005783;GO:0005789;GO:0012505;GO:0016020;GO:0031984;GO:0042175;GO:0043226;GO:0043227;GO:0043229;GO:0043231;GO:0044422;GO:0044424;GO:0044425;GO:0044432;GO:0044444;GO:0044446;GO:0044464;GO:0098827;	Palmitoyl-monogalactosyldiacylglycerol delta-7 desaturase, chloroplastic-like	Delta 9 desaturase
Cla97C07G140200	573	485.375	59.5763	-3.02481	2.1e-90	4.23e-88	Down	NA	NA	NA	NA	NA	RNA binding	Oxidative stress 3, putative isoform 2
Cla97C07G140340	762	32.1375	12.0371	-1.41975	0.000854177	0.00513167	Down	NA	NA	GO:0003674;GO:0003700;GO:0140110;	GO:0006355;GO:0008150;GO:0009889;GO:0010468;GO:0010556;GO:0019219;GO:0019222;GO:0031323;GO:0031326;GO:0048580;GO:0048583;GO:0048586;GO:0048587;GO:0050789;GO:0050793;GO:0050794;GO:0051171;GO:0051239;GO:0051252;GO:0060255;GO:0065007;GO:0080090;GO:1903506;GO:2000026;GO:2000028;GO:2000112;GO:2000241;GO:2001141;GO:0008152;GO:0006139;GO:0006351;GO:0006725;GO:0006807;GO:0009058;GO:0009059;GO:0009987;GO:…	GO:0005575;GO:0005622;GO:0005623;GO:0005634;GO:0043226;GO:0043227;GO:0043229;GO:0043231;GO:0044424;GO:0044464;	Transcription factor	transcription factor bHLH87-like
Cla97C07G141250	483	1561.67	65.5625	-4.57326	0	0	Down	K13993 HSP20; HSP20 family protein	ko04141:Protein processing in endoplasmic reticulum	NA	NA	NA	Belongs to the small heat shock protein (HSP20) family	17.4 kDa class III heat shock protein
Cla97C07G141260	369	230.612	97.3495	-1.245	3.96e-14	1.2e-12	Down	NA	NA	NA	GO:0001558;GO:0008150;GO:0030307;GO:0040008;GO:0045927;GO:0048518;GO:0048522;GO:0050789;GO:0050794;GO:0051128;GO:0065007;GO:0016049;GO:0040007;GO:0009987;GO:0016043;GO:0071840;	GO:0005575;GO:0005622;GO:0005623;GO:0005634;GO:0005737;GO:0005886;GO:0016020;GO:0019897;GO:0019898;GO:0043226;GO:0043227;GO:0043229;GO:0043231;GO:0044424;GO:0044425;GO:0044459;GO:0044464;GO:0071944;	Auxin responsive protein	auxin-responsive protein SAUR50-like
Cla97C07G142250	1587	41.7944	20.5211	-1.02719	0.00589579	0.0265653	Down	K13412 CPK; calcium-dependent protein kinase [EC:2.7.11.1]	ko04626:Plant-pathogen interaction	GO:0003674;GO:0003824;GO:0004672;GO:0004674;GO:0004683;GO:0005488;GO:0005515;GO:0005516;GO:0009931;GO:0010857;GO:0016301;GO:0016740;GO:0016772;GO:0016773;GO:0140096;	GO:0001101;GO:0001558;GO:0006464;GO:0006468;GO:0006793;GO:0006796;GO:0006807;GO:0007154;GO:0007165;GO:0008150;GO:0008152;GO:0009719;GO:0009725;GO:0009737;GO:0009738;GO:0009755;GO:0009987;GO:0010033;GO:0010769;GO:0010959;GO:0016310;GO:0018105;GO:0018193;GO:0018209;GO:0019538;GO:0022603;GO:0022604;GO:0022898;GO:0023052;GO:0032409;GO:0032412;GO:0032870;GO:0032879;GO:0033993;GO:0034762;GO:0034765;GO:…	GO:0005575;GO:0005622;GO:0005623;GO:0005634;GO:0005737;GO:0005886;GO:0016020;GO:0043226;GO:0043227;GO:0043229;GO:0043231;GO:0044424;GO:0044464;GO:0071944;	Calcium-dependent protein kinase	Calcium-dependent protein kinase, putative
Cla97C07G142350	1305	4267.18	93.8484	-5.50686	0	0	Down	NA	NA	NA	GO:0006457;GO:0008150;GO:0009266;GO:0009605;GO:0009607;GO:0009628;GO:0009987;GO:0043207;GO:0050896;	GO:0005575;GO:0005911;GO:0009506;GO:0030054;GO:0055044;	BAG family molecular chaperone regulator	BAG family molecular chaperone regulator 6-like
Cla97C07G142400	1065	8.57148	0	-5.6199	9.25e-05	0.000740837	Down	NA	NA	NA	GO:0008150;GO:0010817;GO:0032879;GO:0050789;GO:0051049;GO:0065007;GO:0065008;GO:2000012;GO:0051179;GO:0006810;GO:0051234;GO:0009914;GO:0009926;GO:0060918;	GO:0005575;GO:0005622;GO:0005623;GO:0005634;GO:0005886;GO:0016020;GO:0043226;GO:0043227;GO:0043229;GO:0043231;GO:0044424;GO:0044464;GO:0071944;	regulation of auxin polar transport	protein LAZY 1-like
Cla97C07G143290	288	30.6384	12.3966	-1.30253	0.00305151	0.0152479	Down	K16297 SCPL-II; serine carboxypeptidase-like clade II [EC:3.4.16.-]	NA	GO:0003674;GO:0003824;GO:0004180;GO:0004185;GO:0008233;GO:0008236;GO:0008238;GO:0016787;GO:0017171;GO:0070008;GO:0070011;GO:0140096;	GO:0006508;GO:0006807;GO:0007154;GO:0007165;GO:0008150;GO:0008152;GO:0009056;GO:0009057;GO:0009719;GO:0009725;GO:0009741;GO:0009742;GO:0009755;GO:0009987;GO:0010033;GO:0014070;GO:0019538;GO:0023052;GO:0030163;GO:0032870;GO:0033993;GO:0042221;GO:0043170;GO:0043401;GO:0044237;GO:0044238;GO:0044248;GO:0044257;GO:0044260;GO:0044265;GO:0044267;GO:0048545;GO:0050789;GO:0050794;GO:0050896;GO:0051603;GO:…	GO:0005575;GO:0005576;GO:0005615;GO:0044421;	Belongs to the peptidase S10 family	Carboxypeptidase
Cla97C07G143300	765	653.036	270.947	-1.26979	7.22e-37	6.21e-35	Down	K16297 SCPL-II; serine carboxypeptidase-like clade II [EC:3.4.16.-]	NA	GO:0003674;GO:0003824;GO:0004180;GO:0004185;GO:0008233;GO:0008236;GO:0008238;GO:0016787;GO:0017171;GO:0070008;GO:0070011;GO:0140096;	GO:0006508;GO:0006807;GO:0007154;GO:0007165;GO:0008150;GO:0008152;GO:0009056;GO:0009057;GO:0009719;GO:0009725;GO:0009741;GO:0009742;GO:0009755;GO:0009987;GO:0010033;GO:0014070;GO:0019538;GO:0023052;GO:0030163;GO:0032870;GO:0033993;GO:0042221;GO:0043170;GO:0043401;GO:0044237;GO:0044238;GO:0044248;GO:0044257;GO:0044260;GO:0044265;GO:0044267;GO:0048545;GO:0050789;GO:0050794;GO:0050896;GO:0051603;GO:…	GO:0005575;GO:0005576;GO:0005615;GO:0044421;	Belongs to the peptidase S10 family	Carboxypeptidase
Cla97C07G143400	318	5.10602	0	-4.85316	0.00277588	0.0140859	Down	NA	NA	NA	NA	NA	Nonspecific lipid-transfer protein	non-specific lipid-transfer protein 2P-like
Cla97C07G143430	294	48.9461	14.2389	-1.78424	1.65e-06	1.94e-05	Down	NA	NA	NA	NA	NA	Plant lipid transfer protein / seed storage protein / trypsin-alpha amylase inhibitor domain family	non-specific lipid-transfer protein 2-like
Cla97C07G144030	585	139.022	64.0263	-1.1195	8.63e-09	1.43e-07	Down	NA	NA	NA	NA	NA	ethylene-responsive transcription factor	ethylene-responsive transcription factor ERF106
Cla97C07G144280	393	2598.78	641.207	-2.01882	1.3e-196	6.55e-194	Down	NA	NA	NA	NA	NA	NA	late embryogenesis abundant protein At5g17165-like
Cla97C08G144620	927	100.207	25.1184	-2.00142	7.96e-13	2.12e-11	Down	K01061 E3.1.1.45; carboxymethylenebutenolidase [EC:3.1.1.45]	NA	GO:0003674;GO:0003824;GO:0004672;GO:0004674;GO:0005488;GO:0005515;GO:0005516;GO:0016301;GO:0016740;GO:0016772;GO:0016773;GO:0140096;	GO:0006464;GO:0006468;GO:0006793;GO:0006796;GO:0006807;GO:0008150;GO:0008152;GO:0009987;GO:0016310;GO:0019538;GO:0036211;GO:0043170;GO:0043412;GO:0044237;GO:0044238;GO:0044260;GO:0044267;GO:0071704;GO:1901564;	GO:0005575;GO:0005623;GO:0005886;GO:0016020;GO:0044464;GO:0071944;	Dienelactone hydrolase family	DLH domain-containing protein
Cla97C08G145950	567	213.05	12.6811	-4.06912	4.21e-47	4.62e-45	Down	K13993 HSP20; HSP20 family protein	ko04141:Protein processing in endoplasmic reticulum	NA	GO:0006950;GO:0008150;GO:0009266;GO:0009408;GO:0009628;GO:0050896;	GO:0005575;GO:0005622;GO:0005623;GO:0005737;GO:0005783;GO:0012505;GO:0043226;GO:0043227;GO:0043229;GO:0043231;GO:0044424;GO:0044444;GO:0044464;	Belongs to the small heat shock protein (HSP20) family	22.0 kDa class IV heat shock protein
Cla97C08G146320	300	106.737	28.2907	-1.91595	2e-13	5.65e-12	Down	NA	NA	NA	NA	NA	NA	Unknown protein
Cla97C08G146360	300	187.358	52.0013	-1.8494	7.55e-22	3.77e-20	Down	NA	NA	NA	NA	NA	NA	Unknown protein
Cla97C08G146370	300	193.638	51.9968	-1.89627	3.37e-23	1.82e-21	Down	NA	NA	NA	NA	NA	NA	Unknown protein
Cla97C08G146390	300	176.936	51.7091	-1.77526	2.91e-19	1.27e-17	Down	NA	NA	NA	NA	NA	NA	Unknown protein
Cla97C08G146740	327	32.321	13.0048	-1.31975	0.00163742	0.00896959	Down	NA	NA	NA	NA	NA	NA	Unknown protein
Cla97C08G147860	1446	5.84867	0	-5.06723	0.0010116	0.00592403	Down	K01179 E3.2.1.4; endoglucanase [EC:3.2.1.4]	ko00500:Starch and sucrose metabolism	NA	NA	NA	Belongs to the glycosyl hydrolase 5 (cellulase A) family	Mannan endo-1,4-beta-mannosidase
Cla97C08G147960	1113	397.854	165.412	-1.26692	4.13e-24	2.34e-22	Down	NA	NA	GO:0000156;GO:0003674;GO:0003676;GO:0003677;GO:0003700;GO:0005488;GO:0043565;GO:0060089;GO:0097159;GO:0140110;GO:1901363;	GO:0000160;GO:0001101;GO:0001763;GO:0006355;GO:0006950;GO:0007154;GO:0007165;GO:0007275;GO:0008150;GO:0009267;GO:0009414;GO:0009415;GO:0009605;GO:0009628;GO:0009653;GO:0009719;GO:0009725;GO:0009735;GO:0009736;GO:0009737;GO:0009755;GO:0009787;GO:0009788;GO:0009888;GO:0009889;GO:0009890;GO:0009892;GO:0009933;GO:0009966;GO:0009968;GO:0009987;GO:0009991;GO:0010014;GO:0010015;GO:0010016;GO:0010033;GO:…	GO:0005575;GO:0005622;GO:0005623;GO:0005634;GO:0043226;GO:0043227;GO:0043229;GO:0043231;GO:0044424;GO:0044464;	transcription factor	myb-like transcription factor family protein
Cla97C08G148320	855	142.447	33.6618	-2.0801	1.2e-17	4.79e-16	Down	K09422 MYBP; transcription factor MYB, plant	NA	GO:0000981;GO:0001067;GO:0001134;GO:0001135;GO:0003674;GO:0003676;GO:0003677;GO:0003700;GO:0005488;GO:0043565;GO:0044212;GO:0097159;GO:0140110;GO:1901363;GO:0005515;GO:0008134;	GO:0000003;GO:0001101;GO:0003006;GO:0006082;GO:0006355;GO:0006357;GO:0006629;GO:0006720;GO:0006721;GO:0006950;GO:0007154;GO:0007165;GO:0007275;GO:0008150;GO:0008152;GO:0008299;GO:0008610;GO:0009058;GO:0009267;GO:0009605;GO:0009653;GO:0009685;GO:0009686;GO:0009719;GO:0009725;GO:0009739;GO:0009740;GO:0009751;GO:0009753;GO:0009755;GO:0009791;GO:0009867;GO:0009889;GO:0009890;GO:0009892;GO:0009908;GO:…	GO:0005575;GO:0005622;GO:0005623;GO:0005634;GO:0043226;GO:0043227;GO:0043229;GO:0043231;GO:0044424;GO:0044464;	Transcription factor	MYB transcription factor
Cla97C08G148330	1158	117.721	35.4971	-1.72589	1.2e-12	3.16e-11	Down	NA	NA	NA	GO:0007154;GO:0007165;GO:0008150;GO:0009719;GO:0009725;GO:0009733;GO:0009734;GO:0009755;GO:0009987;GO:0010033;GO:0023052;GO:0032870;GO:0042221;GO:0050789;GO:0050794;GO:0050896;GO:0051716;GO:0065007;GO:0070887;GO:0071310;GO:0071365;GO:0071495;	GO:0005575;GO:0005622;GO:0005623;GO:0005737;GO:0005886;GO:0005887;GO:0005938;GO:0016020;GO:0016021;GO:0031224;GO:0031226;GO:0044424;GO:0044425;GO:0044444;GO:0044459;GO:0044464;GO:0071944;GO:0099568;	WAT1-related protein	WAT1-related protein
Cla97C08G148620	891	141.534	66.5022	-1.08972	1.58e-08	2.53e-07	Down	NA	NA	NA	NA	NA	No apical meristem (NAM) protein	NAC domain-containing protein
Cla97C08G149920	564	573.251	278.962	-1.03754	3.87e-23	2.09e-21	Down	K00760 hprT, hpt, HPRT1; hypoxanthine phosphoribosyltransferase [EC:2.4.2.8]	ko00230:Purine metabolism	NA	NA	NA	Belongs to the purine pyrimidine phosphoribosyltransferase family	Hypoxanthine phosphoribosyltransferase
Cla97C08G151500	2748	2122.09	842.168	-1.33365	8.39e-119	2.29e-116	Down	NA	NA	NA	NA	NA	T-complex protein 11	T-complex protein 11
Cla97C08G152580	699	87.5369	33.857	-1.36851	1.03e-07	1.49e-06	Down	NA	NA	NA	NA	NA	RNA binding	Damaged dna-binding 2, putative isoform 1
Cla97C08G152630	1764	19.6015	6.06046	-1.69618	0.00375066	0.0181648	Down	K01953 asnB, ASNS; asparagine synthase (glutamine-hydrolysing) [EC:6.3.5.4]	ko00250:Alanine, aspartate and glutamate metabolism	NA	NA	NA	Asparagine synthetase	Asparagine synthetase [glutamine-hydrolyzing]
Cla97C08G154150	927	340.242	63.4746	-2.42322	2.31e-41	2.26e-39	Down	NA	NA	NA	NA	NA	Phosphate-induced protein 1 conserved region	Protein EXORDIUM-like 2
Cla97C08G154780	900	563.419	245.337	-1.19851	5.69e-27	3.58e-25	Down	K01673 cynT, can; carbonic anhydrase [EC:4.2.1.1]	ko00910:Nitrogen metabolism	NA	NA	GO:0005575;GO:0005622;GO:0005623;GO:0005737;GO:0005739;GO:0043226;GO:0043227;GO:0043229;GO:0043231;GO:0044424;GO:0044444;GO:0044464;	Reversible hydration of carbon dioxide	Carbonic anhydrase
Cla97C08G154800	876	52.668	21.5459	-1.28863	0.00011136	0.000871281	Down	NA	NA	GO:0003674;GO:0003676;GO:0003677;GO:0003680;GO:0003690;GO:0003700;GO:0005488;GO:0043565;GO:0097159;GO:0140110;GO:1901363;GO:1990837;	GO:0006355;GO:0008150;GO:0009889;GO:0010468;GO:0010556;GO:0019219;GO:0019222;GO:0031323;GO:0031326;GO:0050789;GO:0050794;GO:0051171;GO:0051252;GO:0060255;GO:0065007;GO:0080090;GO:1903506;GO:2000112;GO:2001141;GO:0008152;GO:0006139;GO:0006351;GO:0006725;GO:0006807;GO:0009058;GO:0009059;GO:0009987;GO:0010467;GO:0016070;GO:0018130;GO:0019438;GO:0032774;GO:0034641;GO:0034645;GO:0034654;GO:0043170;GO:…	GO:0005575;GO:0005622;GO:0005623;GO:0005634;GO:0043226;GO:0043227;GO:0043229;GO:0043231;GO:0044424;GO:0044464;	Transcription factor that specifically binds AT-rich DNA sequences related to the nuclear matrix attachment regions (MARs)	AT-hook motif nuclear-localized protein
Cla97C08G155200	486	67.1158	24.0831	-1.47906	5.6e-07	7.19e-06	Down	NA	NA	NA	NA	NA	rRNA processing	oxidative stress 3
Cla97C08G155290	528	19.3425	2.54481	-2.92629	8.16e-05	0.000661902	Down	NA	NA	NA	NA	NA	Protein of unknown function (DUF1677)	Protein of unknown function (DUF1677)
Cla97C08G155310	492	86.1019	23.2307	-1.89418	1.5e-10	3.13e-09	Down	NA	NA	NA	NA	NA	Lachrymatory-factor	lachrymatory-factor synthase-like
Cla97C08G155900	201	437.88	82.9639	-2.39894	2.17e-66	3.29e-64	Down	NA	NA	NA	NA	NA	NA	Methionyl-tRNA synthetase
Cla97C08G156790	624	314.946	40.936	-2.94379	2.17e-60	2.96e-58	Down	K14484 IAA; auxin-responsive protein IAA	ko04075:Plant hormone signal transduction	GO:0003674;GO:0003700;GO:0140110;	GO:0006355;GO:0008150;GO:0009314;GO:0009416;GO:0009628;GO:0009639;GO:0009719;GO:0009725;GO:0009733;GO:0009889;GO:0010033;GO:0010114;GO:0010218;GO:0010468;GO:0010556;GO:0019219;GO:0019222;GO:0031323;GO:0031326;GO:0042221;GO:0050789;GO:0050794;GO:0050896;GO:0051171;GO:0051252;GO:0060255;GO:0065007;GO:0080090;GO:1903506;GO:2000112;GO:2001141;GO:0008152;GO:0006139;GO:0006351;GO:0006725;GO:0006807;GO:…	NA	Aux IAA proteins are short-lived transcriptional factors that function as repressors of early auxin response genes at low auxin concentrations	Auxin-responsive protein
Cla97C08G157460	630	712.725	199.455	-1.8385	2.34e-70	3.94e-68	Down	NA	NA	NA	NA	NA	Divergent CRAL/TRIO domain	CRAL-TRIO domain-containing protein
Cla97C08G157880	294	129.693	7.88469	-4.03459	5.6e-29	3.78e-27	Down	NA	NA	NA	GO:0000902;GO:0001101;GO:0008150;GO:0009653;GO:0009719;GO:0009725;GO:0009737;GO:0009739;GO:0009741;GO:0009826;GO:0009987;GO:0010033;GO:0014070;GO:0016043;GO:0016049;GO:0032502;GO:0032989;GO:0033993;GO:0040007;GO:0042221;GO:0048589;GO:0048856;GO:0048869;GO:0050896;GO:0060560;GO:0071840;GO:0097305;GO:1901700;	GO:0005575;GO:0005576;GO:0005618;GO:0005623;GO:0009505;GO:0030312;GO:0044464;GO:0071944;	Gibberellin-regulated protein	Gibberellin-regulated protein 2
Cla97C08G158900	1089	2624.89	912.717	-1.52441	1.01e-156	3.85e-154	Down	NA	NA	GO:0003674;GO:0003700;GO:0140110;	GO:0006355;GO:0008150;GO:0009314;GO:0009416;GO:0009628;GO:0009642;GO:0009644;GO:0009889;GO:0009891;GO:0009893;GO:0009962;GO:0010468;GO:0010556;GO:0010557;GO:0010604;GO:0010628;GO:0019219;GO:0019222;GO:0031323;GO:0031325;GO:0031326;GO:0031328;GO:0045893;GO:0045935;GO:0048518;GO:0048522;GO:0050789;GO:0050794;GO:0050896;GO:0051171;GO:0051173;GO:0051252;GO:0051254;GO:0060255;GO:0065007;GO:0080090;GO:…	GO:0005575;GO:0005622;GO:0005623;GO:0005634;GO:0005737;GO:0043226;GO:0043227;GO:0043229;GO:0043231;GO:0044424;GO:0044464;	NAC domain-containing protein	NAC domain-containing protein
Cla97C08G159840	831	10.8983	1.90233	-2.5273	0.00453528	0.0212018	Down	NA	NA	NA	NA	NA	Carbohydrate esterase	SASA domain-containing protein
Cla97C08G159860	867	23.3633	4.12669	-2.49605	3.48e-05	0.000308942	Down	NA	NA	NA	NA	NA	Carbohydrate esterase	SASA domain-containing protein
Cla97C08G159990	2640	16.9456	5.35639	-1.66007	0.00887792	0.0370344	Down	NA	NA	GO:0003674;GO:0003824;GO:0004672;GO:0004888;GO:0016301;GO:0016740;GO:0016772;GO:0016773;GO:0019199;GO:0038023;GO:0060089;GO:0140096;	GO:0002218;GO:0002253;GO:0002376;GO:0002682;GO:0002684;GO:0002764;GO:0006464;GO:0006468;GO:0006793;GO:0006796;GO:0006807;GO:0006950;GO:0006952;GO:0006955;GO:0007154;GO:0007165;GO:0008150;GO:0008152;GO:0008219;GO:0009595;GO:0009605;GO:0009607;GO:0009617;GO:0009626;GO:0009987;GO:0010204;GO:0010359;GO:0012501;GO:0016045;GO:0016310;GO:0019538;GO:0022898;GO:0023052;GO:0031347;GO:0031349;GO:0032409;GO:…	GO:0005575;GO:0005623;GO:0005886;GO:0012505;GO:0016020;GO:0044464;GO:0071944;	Belongs to the protein kinase superfamily. Ser Thr protein kinase family	Protein kinase domain-containing protein
Cla97C08G160000	1557	628.924	225.61	-1.47858	1.8e-48	2.01e-46	Down	NA	NA	NA	NA	NA	Cytochrome p450	Cytochrome P450 81E8
Cla97C08G160160	2472	3.87674	0	-4.46593	0.00837974	0.0353878	Down	NA	NA	NA	NA	NA	subtilisin-like	subtilisin-like protease SBT1.9
Cla97C08G160450	1323	20.5566	4.43983	-2.21133	0.000318907	0.00217923	Down	K01762 ACS; 1-aminocyclopropane-1-carboxylate synthase [EC:4.4.1.14]	ko00270:Cysteine and methionine metabolism	GO:0003674;GO:0003824;GO:0016829;GO:0016846;GO:0016847;	GO:0006082;GO:0006520;GO:0006807;GO:0008150;GO:0008152;GO:0008652;GO:0009058;GO:0009987;GO:0016053;GO:0018871;GO:0019752;GO:0032787;GO:0042218;GO:0043436;GO:0044237;GO:0044238;GO:0044249;GO:0044281;GO:0044283;GO:0046394;GO:0071704;GO:0072330;GO:1901564;GO:1901566;GO:1901576;GO:1901605;GO:1901607;	NA	Aminotransferase class I and II	1-aminocyclopropane-1-carboxylate synthase
Cla97C08G160510	921	444.886	132.372	-1.74861	1.21e-43	1.24e-41	Down	NA	NA	GO:0003674;GO:0005488;GO:0008270;GO:0043167;GO:0043169;GO:0046872;GO:0046914;	GO:0001101;GO:0007154;GO:0007165;GO:0007275;GO:0007568;GO:0008150;GO:0009719;GO:0009725;GO:0009753;GO:0009755;GO:0009867;GO:0009987;GO:0010033;GO:0010150;GO:0023052;GO:0032501;GO:0032502;GO:0032870;GO:0042221;GO:0048366;GO:0048367;GO:0048731;GO:0048827;GO:0048856;GO:0050789;GO:0050794;GO:0050896;GO:0051716;GO:0065007;GO:0070887;GO:0071229;GO:0071310;GO:0071395;GO:0071495;GO:0090693;GO:0099402;GO:…	GO:0005575;GO:0005622;GO:0005623;GO:0005634;GO:0043226;GO:0043227;GO:0043229;GO:0043231;GO:0044424;GO:0044464;	zinc finger CCCH domain-containing protein	Zinc finger CCCH domain-containing protein 20
Cla97C08G160520	621	106.196	33.9018	-1.64702	1.02e-11	2.44e-10	Down	K09422 MYBP; transcription factor MYB, plant	NA	GO:0000981;GO:0001067;GO:0001134;GO:0001135;GO:0003674;GO:0003676;GO:0003677;GO:0003700;GO:0005488;GO:0043565;GO:0044212;GO:0097159;GO:0140110;GO:1901363;GO:0005515;GO:0008134;	GO:0001101;GO:0006355;GO:0006357;GO:0008150;GO:0009719;GO:0009725;GO:0009751;GO:0009889;GO:0009987;GO:0010033;GO:0010468;GO:0010556;GO:0014070;GO:0019219;GO:0019222;GO:0030154;GO:0031323;GO:0031326;GO:0032502;GO:0042221;GO:0042493;GO:0046677;GO:0048869;GO:0050789;GO:0050794;GO:0050896;GO:0051171;GO:0051252;GO:0060255;GO:0065007;GO:0080090;GO:1901700;GO:1903506;GO:2000112;GO:2001141;GO:0008152;GO:…	GO:0005575;GO:0005622;GO:0005623;GO:0005634;GO:0043226;GO:0043227;GO:0043229;GO:0043231;GO:0044424;GO:0044464;	SANT SWI3, ADA2, N-CoR and TFIIIB'' DNA-binding domains	Myb transcription factor
Cla97C08G160780	1092	2853.43	314.368	-3.1825	3.67e-119	1.01e-116	Down	K09419 HSFF; heat shock transcription factor, other eukaryote	NA	GO:0001067;GO:0003674;GO:0003676;GO:0003677;GO:0003700;GO:0005488;GO:0044212;GO:0097159;GO:0140110;GO:1901363;	GO:0000302;GO:0001666;GO:0006355;GO:0006950;GO:0006979;GO:0006986;GO:0008150;GO:0009266;GO:0009314;GO:0009408;GO:0009416;GO:0009628;GO:0009636;GO:0009642;GO:0009644;GO:0009889;GO:0009891;GO:0009893;GO:0009987;GO:0010033;GO:0010035;GO:0010200;GO:0010243;GO:0010286;GO:0010468;GO:0010556;GO:0010557;GO:0010604;GO:0010628;GO:0019219;GO:0019222;GO:0031323;GO:0031325;GO:0031326;GO:0031328;GO:0033554;GO:…	GO:0005575;GO:0005622;GO:0005623;GO:0005634;GO:0043226;GO:0043227;GO:0043229;GO:0043231;GO:0044424;GO:0044464;	Heat shock factor protein	Heat stress transcription factor
Cla97C08G160790	1461	570.291	190.398	-1.58309	1.71e-45	1.81e-43	Down	NA	NA	NA	NA	NA	Short calmodulin-binding motif containing conserved Ile and Gln residues.	IQ domain-containing protein IQM1
Cla97C08G161110	1332	68.7839	18.0795	-1.92509	2.34e-09	4.23e-08	Down	K13065 E2.3.1.133, HCT; shikimate O-hydroxycinnamoyltransferase [EC:2.3.1.133]	ko00940:Phenylpropanoid biosynthesis|ko00941:Flavonoid biosynthesis|ko00945:Stilbenoid, diarylheptanoid and gingerol biosynthesis	GO:0003674;GO:0003824;GO:0016740;GO:0016746;GO:0016747;GO:0050636;	GO:0006807;GO:0008150;GO:0008152;GO:0009820;GO:0071704;GO:1901564;	NA	Vinorine synthase-like	Vinorine synthase-like
Cla97C08G161240	1224	100.68	39.7466	-1.34425	6.75e-08	1e-06	Down	K01728 pel; pectate lyase [EC:4.2.2.2]	ko00040:Pentose and glucuronate interconversions	NA	NA	NA	Pectate lyase	Pectate lyase
Cla97C08G161510	1056	70.6305	0	-8.65765	9.57e-13	2.53e-11	Down	K16903 TAA1; L-tryptophan---pyruvate aminotransferase [EC:2.6.1.99]	ko00380:Tryptophan metabolism	GO:0003674;GO:0003824;GO:0004021;GO:0004838;GO:0005488;GO:0008144;GO:0008483;GO:0008793;GO:0010326;GO:0016740;GO:0016769;GO:0019842;GO:0030170;GO:0036094;GO:0043167;GO:0043168;GO:0047312;GO:0047635;GO:0048037;GO:0050048;GO:0050362;GO:0050662;GO:0070279;GO:0070529;GO:0070546;GO:0070547;GO:0070548;GO:0080097;GO:0080098;GO:0080099;GO:0080100;GO:0080130;GO:0097159;GO:1901363;	GO:0000003;GO:0003006;GO:0006082;GO:0006725;GO:0006807;GO:0006810;GO:0006950;GO:0006952;GO:0007275;GO:0008150;GO:0008152;GO:0009058;GO:0009314;GO:0009416;GO:0009605;GO:0009606;GO:0009607;GO:0009617;GO:0009628;GO:0009629;GO:0009630;GO:0009639;GO:0009641;GO:0009653;GO:0009683;GO:0009684;GO:0009719;GO:0009723;GO:0009725;GO:0009791;GO:0009850;GO:0009851;GO:0009888;GO:0009908;GO:0009914;GO:0009926;GO:…	GO:0005575;GO:0005622;GO:0005623;GO:0005737;GO:0044424;GO:0044464;	L-tryptophan--pyruvate aminotransferase 1-like	L-tryptophan--pyruvate aminotransferase 1-like
Cla97C08G161580	828	558.839	268.757	-1.05693	8.08e-26	4.84e-24	Down	NA	NA	GO:0003674;GO:0003700;GO:0140110;	GO:0000003;GO:0003002;GO:0003006;GO:0006355;GO:0007154;GO:0007165;GO:0007275;GO:0007389;GO:0008150;GO:0009653;GO:0009719;GO:0009725;GO:0009735;GO:0009736;GO:0009755;GO:0009791;GO:0009888;GO:0009889;GO:0009908;GO:0009987;GO:0010033;GO:0010073;GO:0010093;GO:0010094;GO:0010468;GO:0010556;GO:0019219;GO:0019222;GO:0022414;GO:0023052;GO:0031323;GO:0031326;GO:0032501;GO:0032502;GO:0032870;GO:0042221;GO:…	GO:0005575;GO:0005622;GO:0005623;GO:0005634;GO:0043226;GO:0043227;GO:0043229;GO:0043231;GO:0044424;GO:0044464;	Homeobox protein knotted-1-like	Homeobox protein knotted-1-like 1
Cla97C09G162200	1398	72.7931	19.3269	-1.91454	4.75e-09	8.19e-08	Down	NA	NA	NA	NA	NA	Carbohydrate-binding protein of the ER	Leucine-rich repeat protein kinase family protein
Cla97C09G162350	1176	15.7041	3.48708	-2.17049	0.00241108	0.0124891	Down	NA	NA	NA	GO:0006355;GO:0008150;GO:0009889;GO:0010468;GO:0010556;GO:0019219;GO:0019222;GO:0031323;GO:0031326;GO:0048580;GO:0048583;GO:0048586;GO:0048587;GO:0050789;GO:0050793;GO:0050794;GO:0051171;GO:0051239;GO:0051252;GO:0060255;GO:0065007;GO:0080090;GO:1903506;GO:2000026;GO:2000028;GO:2000112;GO:2000241;GO:2001141;GO:0008152;GO:0006139;GO:0006351;GO:0006725;GO:0006807;GO:0009058;GO:0009059;GO:0009987;GO:…	GO:0005575;GO:0005622;GO:0005623;GO:0005634;GO:0043226;GO:0043227;GO:0043229;GO:0043231;GO:0044424;GO:0044464;	Transcription factor	transcription factor bHLH87
Cla97C09G163300	612	2144.98	676.378	-1.66542	4.19e-169	1.84e-166	Down	NA	NA	GO:0003674;GO:0005488;GO:0005515;GO:0051087;	NA	NA	DnaJ homolog subfamily B member	dnaJ homolog subfamily B member 6-like
Cla97C09G163860	2295	5.26899	0	-4.90987	0.00193445	0.010364	Down	K15820 IMS1; isomultiflorenol synthase [EC:5.4.99.36]	ko00909:Sesquiterpenoid and triterpenoid biosynthesis	GO:0003674;GO:0003824;GO:0016853;GO:0016866;GO:0031559;GO:0034074;GO:0034075;GO:0042299;GO:0051746;GO:0080011;	GO:0006629;GO:0006720;GO:0006721;GO:0006722;GO:0007275;GO:0008150;GO:0008152;GO:0008299;GO:0008610;GO:0009058;GO:0009987;GO:0010263;GO:0010683;GO:0010685;GO:0010686;GO:0016104;GO:0016114;GO:0022622;GO:0032501;GO:0032502;GO:0044237;GO:0044238;GO:0044249;GO:0044255;GO:0048364;GO:0048731;GO:0048856;GO:0071704;GO:0080003;GO:0099402;GO:1901360;GO:1901362;GO:1901576;	GO:0005575;GO:0005622;GO:0005623;GO:0005737;GO:0005783;GO:0005911;GO:0009506;GO:0012505;GO:0030054;GO:0043226;GO:0043227;GO:0043229;GO:0043231;GO:0044424;GO:0044444;GO:0044464;GO:0055044;	Belongs to the terpene cyclase mutase family	Terpene cyclase/mutase family member
Cla97C09G164420	354	6.47776	0	-5.20001	0.000644184	0.00402585	Down	NA	NA	NA	NA	NA	Thionin-like protein 2	thionin-like protein 2
Cla97C09G165430	543	21.4708	5.06896	-2.08438	0.00037106	0.0024761	Down	NA	NA	GO:0003674;GO:0003700;GO:0140110;	GO:0000160;GO:0006355;GO:0007154;GO:0007165;GO:0008150;GO:0009719;GO:0009723;GO:0009725;GO:0009755;GO:0009873;GO:0009889;GO:0009987;GO:0010033;GO:0010468;GO:0010556;GO:0019219;GO:0019222;GO:0023052;GO:0031323;GO:0031326;GO:0032870;GO:0035556;GO:0042221;GO:0050789;GO:0050794;GO:0050896;GO:0051171;GO:0051252;GO:0051716;GO:0060255;GO:0065007;GO:0070887;GO:0071310;GO:0071369;GO:0071495;GO:0080090;GO:…	NA	transcription factor	ethylene-responsive transcription factor ERF084-like
Cla97C09G165710	1227	28.31	12.7066	-1.15567	0.009463	0.0390554	Down	K09285 OVM, ANT; AP2-like factor, ANT lineage	NA	GO:0000981;GO:0003674;GO:0003700;GO:0140110;	GO:0001101;GO:0006355;GO:0006357;GO:0006950;GO:0006970;GO:0008150;GO:0009414;GO:0009415;GO:0009628;GO:0009651;GO:0009719;GO:0009725;GO:0009737;GO:0009889;GO:0009891;GO:0009893;GO:0010029;GO:0010033;GO:0010035;GO:0010187;GO:0010468;GO:0010556;GO:0010557;GO:0010565;GO:0010604;GO:0019216;GO:0019217;GO:0019219;GO:0019222;GO:0031323;GO:0031325;GO:0031326;GO:0031328;GO:0033993;GO:0040008;GO:0042221;GO:…	NA	AP2-like ethylene-responsive transcription factor	AP2-like ethylene-responsive transcription factor
Cla97C09G166730	1515	84.837	39.3643	-1.11266	3.29e-05	0.000294473	Down	NA	NA	NA	GO:0006950;GO:0006952;GO:0007154;GO:0007165;GO:0008150;GO:0009987;GO:0023052;GO:0050789;GO:0050794;GO:0050896;GO:0051716;GO:0065007;	GO:0005575;GO:0005623;GO:0005886;GO:0016020;GO:0044464;GO:0071944;	Belongs to the disease resistance NB-LRR family	disease resistance protein RGA2-like
Cla97C09G167950	480	296.072	128.189	-1.20644	1.66e-15	5.51e-14	Down	NA	NA	NA	NA	GO:0005575;GO:0005622;GO:0005623;GO:0005737;GO:0005813;GO:0005815;GO:0005856;GO:0015630;GO:0043226;GO:0043228;GO:0043229;GO:0043232;GO:0044422;GO:0044424;GO:0044430;GO:0044446;GO:0044464;	DnaJ homolog subfamily B member	Chaperone protein DnaJ-like
Cla97C09G168240	1035	11.6987	2.85191	-2.02912	0.0111004	0.0445296	Down	NA	NA	NA	NA	NA	NA	Ankyrin repeat protein
Cla97C09G168270	1035	11.2479	2.54036	-2.14439	0.0088269	0.0368524	Down	NA	NA	NA	NA	NA	NA	Ankyrin repeat protein
Cla97C09G168460	489	2261.69	1073.64	-1.07466	1.08e-86	2.11e-84	Down	NA	NA	NA	NA	NA	Universal stress protein	Adenine nucleotide alpha hydrolases-like superfamily protein
Cla97C09G168640	930	8.07416	0	-5.52565	0.000132679	0.00101258	Down	NA	NA	NA	NA	NA	Desiccation-related protein PCC13-62-like	desiccation-related protein PCC13-62-like
Cla97C09G170010	1113	706.263	72.2883	-3.28775	2.26e-139	7.86e-137	Down	K09419 HSFF; heat shock transcription factor, other eukaryote	NA	GO:0003674;GO:0003700;GO:0005488;GO:0005515;GO:0042802;GO:0140110;	GO:0006355;GO:0006950;GO:0008150;GO:0009266;GO:0009314;GO:0009408;GO:0009416;GO:0009628;GO:0009642;GO:0009644;GO:0009889;GO:0010468;GO:0010556;GO:0019219;GO:0019222;GO:0031323;GO:0031326;GO:0032268;GO:0050789;GO:0050794;GO:0050896;GO:0051171;GO:0051246;GO:0051252;GO:0060255;GO:0065007;GO:0080090;GO:1903506;GO:2000112;GO:2001141;GO:0008152;GO:0006139;GO:0006351;GO:0006725;GO:0006807;GO:0009058;GO:…	NA	Heat Stress Transcription Factor	heat stress transcription factor A-6b-like
Cla97C09G170020	378	623.038	172.146	-1.85413	2.97e-63	4.31e-61	Down	NA	NA	NA	NA	NA	NA	Unknown protein
Cla97C09G170160	702	1643.18	679.462	-1.27394	8.7e-84	1.66e-81	Down	K14484 IAA; auxin-responsive protein IAA	ko04075:Plant hormone signal transduction	NA	NA	NA	Aux IAA proteins are short-lived transcriptional factors that function as repressors of early auxin response genes at low auxin concentrations	Auxin-responsive protein
Cla97C09G171340	765	19.84	4.44427	-2.1599	0.000366806	0.00245258	Down	NA	NA	GO:0003674;GO:0003700;GO:0140110;	GO:0000003;GO:0003006;GO:0006355;GO:0007154;GO:0007165;GO:0007275;GO:0008150;GO:0009653;GO:0009719;GO:0009725;GO:0009733;GO:0009734;GO:0009755;GO:0009790;GO:0009791;GO:0009793;GO:0009888;GO:0009889;GO:0009933;GO:0009987;GO:0010014;GO:0010016;GO:0010033;GO:0010072;GO:0010154;GO:0010468;GO:0010556;GO:0019219;GO:0019222;GO:0022414;GO:0022622;GO:0023052;GO:0031323;GO:0031326;GO:0032501;GO:0032502;GO:…	GO:0005575;GO:0005622;GO:0005623;GO:0005634;GO:0043226;GO:0043227;GO:0043229;GO:0043231;GO:0044424;GO:0044464;	NAC domain-containing protein	NAC domain-containing protein
Cla97C09G171710	213	1730.66	323.038	-2.42048	3.79e-141	1.34e-138	Down	NA	NA	NA	NA	NA	SERF-like protein	4F5 domain-containing protein
Cla97C09G171720	216	1646.39	128.286	-3.68106	0	0	Down	NA	NA	NA	NA	NA	NA	Unknown protein
Cla97C09G171850	807	6117.8	2035.73	-1.58733	9.73e-267	7.56e-264	Down	K22762 DESI1, PPPDE2; desumoylating isopeptidase 1 [EC:3.4.-.-]	NA	NA	NA	NA	Desumoylating isopeptidase	desumoylating isopeptidase 1
Cla97C09G172790	747	20.6443	0.311552	-5.92504	4.34e-06	4.69e-05	Down	NA	NA	NA	NA	NA	NA	extensin-like
Cla97C09G172860	2034	1514.86	213.08	-2.82889	8.63e-237	5.44e-234	Down	K03283 HSPA1s; heat shock 70kDa protein 1/2/6/8	ko03040:Spliceosome|ko04141:Protein processing in endoplasmic reticulum|ko04144:Endocytosis	NA	GO:0006605;GO:0006810;GO:0006886;GO:0006950;GO:0008104;GO:0008150;GO:0009266;GO:0009408;GO:0009628;GO:0010035;GO:0010038;GO:0015031;GO:0015833;GO:0033036;GO:0033365;GO:0034613;GO:0042221;GO:0042886;GO:0045036;GO:0045184;GO:0046686;GO:0046907;GO:0050896;GO:0051179;GO:0051234;GO:0051641;GO:0051649;GO:0070727;GO:0071702;GO:0071705;GO:0072594;GO:0072596;GO:0072598;	GO:0005575;GO:0005576;GO:0005622;GO:0005623;GO:0005737;GO:0009507;GO:0009526;GO:0009532;GO:0009536;GO:0009570;GO:0009579;GO:0009941;GO:0031967;GO:0031975;GO:0043226;GO:0043227;GO:0043229;GO:0043231;GO:0044422;GO:0044424;GO:0044434;GO:0044435;GO:0044444;GO:0044446;GO:0044464;GO:0048046;	Stromal 70 kDa heat shock-related protein	Heat shock protein, putative
Cla97C09G173270	912	5.86917	0	-5.07123	0.000999775	0.00587524	Down	NA	NA	GO:0001067;GO:0003674;GO:0003676;GO:0003677;GO:0003700;GO:0005488;GO:0005515;GO:0042802;GO:0042803;GO:0043565;GO:0044212;GO:0046982;GO:0046983;GO:0097159;GO:0140110;GO:1901363;	GO:0001101;GO:0005975;GO:0005976;GO:0006355;GO:0006950;GO:0006952;GO:0008150;GO:0008152;GO:0009605;GO:0009607;GO:0009620;GO:0009719;GO:0009725;GO:0009733;GO:0009735;GO:0009737;GO:0009741;GO:0009888;GO:0009889;GO:0009891;GO:0009893;GO:0009987;GO:0010033;GO:0010087;GO:0010089;GO:0010383;GO:0010410;GO:0010468;GO:0010556;GO:0010557;GO:0010604;GO:0010628;GO:0014070;GO:0019219;GO:0019222;GO:0030154;GO:…	GO:0005575;GO:0005622;GO:0005623;GO:0005634;GO:0043226;GO:0043227;GO:0043229;GO:0043231;GO:0044424;GO:0044464;	NAC domain-containing protein	NAC domain-containing protein
Cla97C09G173550	339	3729.14	1162.59	-1.68097	1.8e-212	1.01e-209	Down	K03113 EIF1, SUI1; translation initiation factor 1	NA	NA	NA	NA	Protein translation factor SUI1 homolog	protein translation factor SUI1 homolog
Cla97C09G173910	957	6910.28	3047.37	-1.18086	2.27e-196	1.12e-193	Down	K05933 E1.14.17.4; aminocyclopropanecarboxylate oxidase [EC:1.14.17.4]	ko00270:Cysteine and methionine metabolism	NA	GO:0008150;GO:0008152;GO:0009058;GO:0009692;GO:0009693;GO:0009987;GO:0010817;GO:0042445;GO:0042446;GO:0043449;GO:0043450;GO:0044237;GO:0044249;GO:0065007;GO:0065008;GO:0071704;GO:1900673;GO:1900674;GO:1901576;	NA	Belongs to the iron ascorbate-dependent oxidoreductase family	1-aminocyclopropane-1-carboxylate oxidase 1
Cla97C09G173950	1776	113.457	52.9673	-1.0997	2.86e-07	3.85e-06	Down	NA	NA	NA	NA	NA	Clathrin coat assembly protein	clathrin coat assembly protein AP180
Cla97C09G175480	759	7.59577	0.957196	-2.9982	0.010694	0.043216	Down	NA	NA	NA	NA	NA	Belongs to the expansin family	expansin-like B1
Cla97C09G175530	747	426.991	130.248	-1.71342	2.72e-42	2.68e-40	Down	K21889 TMBIM6, BI1, TEGT; Bax inhibitor 1	NA	NA	GO:0000038;GO:0001101;GO:0006082;GO:0006629;GO:0006631;GO:0006950;GO:0006983;GO:0006984;GO:0007154;GO:0007165;GO:0008150;GO:0008152;GO:0009414;GO:0009415;GO:0009607;GO:0009628;GO:0009987;GO:0010035;GO:0010941;GO:0019752;GO:0023052;GO:0032787;GO:0033554;GO:0034976;GO:0042221;GO:0043067;GO:0043069;GO:0043436;GO:0044237;GO:0044238;GO:0044255;GO:0044281;GO:0048519;GO:0048523;GO:0050789;GO:0050794;GO:…	GO:0005575;GO:0005622;GO:0005623;GO:0005634;GO:0005635;GO:0005737;GO:0005783;GO:0012505;GO:0031967;GO:0031975;GO:0043226;GO:0043227;GO:0043229;GO:0043231;GO:0044422;GO:0044424;GO:0044428;GO:0044444;GO:0044446;GO:0044464;	Belongs to the BI1 family	BAX inhibitor 1
Cla97C09G176070	1965	1872.3	817.982	-1.1941	3.02e-76	5.3e-74	Down	K01613 psd, PISD; phosphatidylserine decarboxylase [EC:4.1.1.65]	ko00564:Glycerophospholipid metabolism	GO:0003674;GO:0003824;GO:0004609;GO:0016829;GO:0016830;GO:0016831;	NA	GO:0000325;GO:0005575;GO:0005622;GO:0005623;GO:0005737;GO:0005773;GO:0005774;GO:0005783;GO:0009705;GO:0012505;GO:0016020;GO:0031090;GO:0043226;GO:0043227;GO:0043229;GO:0043231;GO:0044422;GO:0044424;GO:0044437;GO:0044444;GO:0044446;GO:0044464;GO:0098588;GO:0098805;	Catalyzes the formation of phosphatidylethanolamine (PtdEtn) from phosphatidylserine (PtdSer). Plays a central role in phospholipid metabolism and in the interorganelle trafficking of phosphatidylserine	Phosphatidylserine decarboxylase proenzyme 2
Cla97C09G176180	561	38.5345	7.95073	-2.27754	5.56e-07	7.14e-06	Down	NA	NA	GO:0003674;GO:0003676;GO:0003677;GO:0003700;GO:0005488;GO:0043565;GO:0097159;GO:0140110;GO:1901363;	GO:0006355;GO:0007275;GO:0008150;GO:0009314;GO:0009416;GO:0009628;GO:0009639;GO:0009640;GO:0009641;GO:0009791;GO:0009889;GO:0010468;GO:0010556;GO:0019219;GO:0019222;GO:0031323;GO:0031326;GO:0032501;GO:0032502;GO:0048856;GO:0050789;GO:0050794;GO:0050896;GO:0051171;GO:0051252;GO:0060255;GO:0065007;GO:0080090;GO:1903506;GO:2000112;GO:2001141;GO:0008152;GO:0006139;GO:0006351;GO:0006725;GO:0006807;GO:…	GO:0005575;GO:0005622;GO:0005623;GO:0005634;GO:0043226;GO:0043227;GO:0043229;GO:0043231;GO:0044424;GO:0044464;	ZINC FINGER protein	Zinc finger, B-box
Cla97C09G176780	372	14.7887	3.79863	-1.96507	0.00484086	0.0223934	Down	NA	NA	NA	NA	NA	NA	major latex allergen Hev b 5-like
Cla97C09G177660	255	4.07405	0	-4.54971	0.00720277	0.0312342	Down	NA	NA	NA	NA	NA	NA	Unknown protein
Cla97C09G179110	324	139.767	28.2507	-2.30845	3.66e-21	1.75e-19	Down	NA	NA	NA	NA	NA	NA	Unknown protein
Cla97C09G179220	1107	68.5489	27.66	-1.31167	1.76e-05	0.000167197	Down	NA	NA	NA	NA	NA	UPF0496 protein At4g34320-like	UPF0496 protein
Cla97C09G179420	2337	25.4281	8.23687	-1.6317	0.00105432	0.00614926	Down	NA	NA	NA	GO:0008150;GO:0042592;GO:0048878;GO:0050801;GO:0055062;GO:0055065;GO:0055069;GO:0055076;GO:0055080;GO:0055081;GO:0055083;GO:0065007;GO:0065008;GO:0072505;GO:0072506;GO:0072507;GO:0098771;	GO:0005575;GO:0005622;GO:0005623;GO:0005737;GO:0005794;GO:0005802;GO:0005886;GO:0012505;GO:0016020;GO:0031984;GO:0043226;GO:0043227;GO:0043229;GO:0043231;GO:0044422;GO:0044424;GO:0044431;GO:0044444;GO:0044446;GO:0044464;GO:0071944;GO:0098791;	phosphate transporter PHO1 homolog	phosphate transporter PHO1 homolog 9-like
Cla97C09G179670	936	102.764	27.9398	-1.87884	5.34e-12	1.32e-10	Down	K09422 MYBP; transcription factor MYB, plant	NA	GO:0000981;GO:0001067;GO:0001134;GO:0001135;GO:0003674;GO:0003676;GO:0003677;GO:0003700;GO:0005488;GO:0043565;GO:0044212;GO:0097159;GO:0140110;GO:1901363;GO:0005515;GO:0008134;	GO:0000038;GO:0001101;GO:0001666;GO:0002376;GO:0006082;GO:0006355;GO:0006357;GO:0006629;GO:0006631;GO:0006633;GO:0006950;GO:0006952;GO:0006955;GO:0008150;GO:0008152;GO:0008219;GO:0008610;GO:0009058;GO:0009605;GO:0009607;GO:0009617;GO:0009626;GO:0009628;GO:0009719;GO:0009723;GO:0009725;GO:0009733;GO:0009739;GO:0009751;GO:0009753;GO:0009889;GO:0009987;GO:0010033;GO:0010468;GO:0010556;GO:0012501;GO:…	GO:0005575;GO:0005622;GO:0005623;GO:0005634;GO:0043226;GO:0043227;GO:0043229;GO:0043231;GO:0044424;GO:0044464;	Myb-related protein	MYB transcription factor
Cla97C09G180900	1452	1223.47	512.941	-1.25442	3.62e-69	5.94e-67	Down	K12639 CYP724, D11; steroid 22S-hydroxylase [EC:1.14.14.178]	ko00905:Brassinosteroid biosynthesis	GO:0003674;GO:0003824;GO:0004497;GO:0005488;GO:0016491;GO:0020037;GO:0046906;GO:0048037;GO:0097159;GO:1901363;	GO:0006629;GO:0006694;GO:0007275;GO:0008150;GO:0008152;GO:0008202;GO:0008610;GO:0009058;GO:0009314;GO:0009416;GO:0009628;GO:0009642;GO:0009646;GO:0009647;GO:0009791;GO:0010268;GO:0010817;GO:0016125;GO:0016128;GO:0016129;GO:0016131;GO:0016132;GO:0032501;GO:0032502;GO:0042445;GO:0042446;GO:0042592;GO:0044238;GO:0048856;GO:0048878;GO:0050896;GO:0055088;GO:0055114;GO:0065007;GO:0065008;GO:0071704;GO:…	NA	Belongs to the cytochrome P450 family	Cytochrome P450
Cla97C09G181360	1947	34291.3	3263.55	-3.39336	0	0	Down	K03283 HSPA1s; heat shock 70kDa protein 1/2/6/8	ko03040:Spliceosome|ko04141:Protein processing in endoplasmic reticulum|ko04144:Endocytosis	NA	NA	NA	Belongs to the heat shock protein 70 family	Heat shock 70 kDa protein
Cla97C09G181410	1959	33322	9815.05	-1.76344	0	0	Down	K03283 HSPA1s; heat shock 70kDa protein 1/2/6/8	ko03040:Spliceosome|ko04141:Protein processing in endoplasmic reticulum|ko04144:Endocytosis	GO:0002020;GO:0003674;GO:0005488;GO:0005515;GO:0019899;	GO:0006950;GO:0006952;GO:0008150;GO:0009266;GO:0009408;GO:0009409;GO:0009605;GO:0009607;GO:0009615;GO:0009617;GO:0009620;GO:0009628;GO:0009987;GO:0010029;GO:0010035;GO:0010038;GO:0010118;GO:0010187;GO:0042221;GO:0042742;GO:0043207;GO:0046686;GO:0048519;GO:0048580;GO:0048581;GO:0050789;GO:0050793;GO:0050832;GO:0050896;GO:0051093;GO:0051239;GO:0051241;GO:0051704;GO:0051707;GO:0065007;GO:0080167;GO:…	GO:0005575;GO:0005576;GO:0005618;GO:0005622;GO:0005623;GO:0005634;GO:0005730;GO:0005737;GO:0005773;GO:0005774;GO:0005794;GO:0005829;GO:0005840;GO:0005886;GO:0005911;GO:0009506;GO:0009507;GO:0009526;GO:0009536;GO:0009941;GO:0012505;GO:0016020;GO:0016363;GO:0022626;GO:0030054;GO:0030312;GO:0031090;GO:0031967;GO:0031974;GO:0031975;GO:0031981;GO:0032991;GO:0034399;GO:0043226;GO:0043227;GO:0043228;GO:…	Heat shock cognate 70 kDa	Heat shock 70 kDa protein
Cla97C09G183030	1218	497.089	244.633	-1.02197	3.12e-22	1.6e-20	Down	K01623 ALDO; fructose-bisphosphate aldolase, class I [EC:4.1.2.13]	ko00010:Glycolysis / Gluconeogenesis|ko00030:Pentose phosphate pathway|ko00051:Fructose and mannose metabolism|ko00710:Carbon fixation in photosynthetic organisms	GO:0003674;GO:0003824;GO:0004332;GO:0016829;GO:0016830;GO:0016832;	GO:0001666;GO:0005975;GO:0005996;GO:0006006;GO:0006082;GO:0006090;GO:0006091;GO:0006094;GO:0006096;GO:0006139;GO:0006163;GO:0006164;GO:0006165;GO:0006725;GO:0006732;GO:0006733;GO:0006753;GO:0006754;GO:0006757;GO:0006793;GO:0006796;GO:0006807;GO:0006950;GO:0008150;GO:0008152;GO:0009056;GO:0009058;GO:0009108;GO:0009117;GO:0009123;GO:0009124;GO:0009126;GO:0009127;GO:0009132;GO:0009135;GO:0009141;GO:…	GO:0005575;GO:0005622;GO:0005623;GO:0005737;GO:0009507;GO:0009536;GO:0043226;GO:0043227;GO:0043229;GO:0043231;GO:0044424;GO:0044444;GO:0044464;	fructose-bisphosphate aldolase	Fructose-bisphosphate aldolase
Cla97C09G183580	2301	31.6866	9.17153	-1.79138	0.000116032	0.000904683	Down	K15813 LUP4; beta-amyrin synthase [EC:5.4.99.39]	ko00909:Sesquiterpenoid and triterpenoid biosynthesis	NA	NA	NA	Belongs to the terpene cyclase mutase family	Terpene cyclase/mutase family member
Cla97C09G184080	282	165.146	36.1281	-2.19052	1.52e-23	8.35e-22	Down	NA	NA	NA	NA	NA	Cysteine-rich and transmembrane domain-containing protein	Cysteine-rich transmembrane CYSTM domain containing protein
Cla97C09G184400	1068	421.216	196.597	-1.09729	1.64e-20	7.59e-19	Down	K14709 SLC39A1_2_3, ZIP1_2_3; solute carrier family 39 (zinc transporter), member 1/2/3	NA	GO:0003674;GO:0005215;GO:0005385;GO:0008324;GO:0015075;GO:0015318;GO:0022857;GO:0022890;GO:0046873;GO:0046915;GO:0072509;	GO:0000041;GO:0006810;GO:0006811;GO:0006812;GO:0006829;GO:0008150;GO:0030001;GO:0034220;GO:0051179;GO:0051234;GO:0055085;GO:0070838;GO:0071577;GO:0072511;GO:0098655;GO:0098660;GO:0098662;	GO:0005575;GO:0005623;GO:0005886;GO:0016020;GO:0044464;GO:0071944;	Zinc transporter	zinc transporter 1
Cla97C10G184710	1239	36.561	13.9696	-1.38927	0.000496938	0.0031916	Down	K24139 PILS, ECM3; auxin efflux carrier family protein	NA	GO:0003674;GO:0005215;GO:0010329;GO:0015562;GO:0022857;GO:0080161;	GO:0006810;GO:0007275;GO:0008150;GO:0009653;GO:0009719;GO:0009725;GO:0009733;GO:0009791;GO:0009914;GO:0009966;GO:0010015;GO:0010033;GO:0010101;GO:0010102;GO:0010252;GO:0010311;GO:0010315;GO:0010646;GO:0010817;GO:0010928;GO:0022622;GO:0023051;GO:0032501;GO:0032502;GO:0040008;GO:0040009;GO:0042221;GO:0042592;GO:0048364;GO:0048527;GO:0048528;GO:0048583;GO:0048646;GO:0048731;GO:0048856;GO:0048878;GO:…	GO:0005575;GO:0005622;GO:0005623;GO:0005737;GO:0005783;GO:0005789;GO:0012505;GO:0016020;GO:0031984;GO:0042175;GO:0043226;GO:0043227;GO:0043229;GO:0043231;GO:0044422;GO:0044424;GO:0044425;GO:0044432;GO:0044444;GO:0044446;GO:0044464;GO:0098827;	Transporter	protein PIN-LIKES 7-like
Cla97C10G184930	873	230.459	90.1761	-1.35624	1.06e-13	3.05e-12	Down	NA	NA	NA	NA	NA	Arabidopsis protein of unknown function	Arabidopsis protein of unknown function (DUF241)
Cla97C10G185400	1350	5900.26	2029.71	-1.5398	5.53e-268	4.65e-265	Down	K01761 E4.4.1.11; methionine-gamma-lyase [EC:4.4.1.11]	ko00270:Cysteine and methionine metabolism|ko00450:Selenocompound metabolism	NA	NA	NA	Methionine gamma-lyase-like	methionine gamma-lyase-like
Cla97C10G186590	672	379.215	130.319	-1.54186	1.23e-27	7.87e-26	Down	K21806 VCPKMT, METTL21D; protein N-lysine methyltransferase METTL21D [EC:2.1.1.-]	NA	NA	NA	NA	Lysine methyltransferase	protein N-lysine methyltransferase METTL21A-like
Cla97C10G187290	636	14074.7	606.094	-4.53684	0	0	Down	K13993 HSP20; HSP20 family protein	ko04141:Protein processing in endoplasmic reticulum	NA	GO:0006950;GO:0006970;GO:0008150;GO:0009266;GO:0009408;GO:0009628;GO:0050896;	NA	Belongs to the small heat shock protein (HSP20) family	Small heat shock protein
Cla97C10G187580	579	5.21414	0	-4.89825	0.00209294	0.0110742	Down	NA	NA	NA	NA	NA	enzyme inhibitor activity	Plant invertase/pectin methylesterase inhibitor superfamily protein, putative
Cla97C10G188080	3291	16.9388	5.05818	-1.74447	0.0102057	0.0415349	Down	NA	NA	NA	NA	NA	Plant family of unknown function (DUF810)	Protein of unknown function (DUF810)
Cla97C10G188210	1179	31.203	9.5161	-1.71572	0.000150557	0.00112602	Down	K15803 GERD; (-)-germacrene D synthase [EC:4.2.3.75]	ko00909:Sesquiterpenoid and triterpenoid biosynthesis	NA	NA	NA	(-)-germacrene D synthase-like	(-)-germacrene D synthase-like
Cla97C10G188250	1674	167.333	3.47818	-5.58522	7.51e-32	5.5e-30	Down	K15803 GERD; (-)-germacrene D synthase [EC:4.2.3.75]	ko00909:Sesquiterpenoid and triterpenoid biosynthesis	GO:0003674;GO:0003824;GO:0010333;GO:0010334;GO:0016829;GO:0016835;GO:0016838;	GO:0006629;GO:0006644;GO:0006720;GO:0006721;GO:0006793;GO:0006796;GO:0008150;GO:0008152;GO:0008299;GO:0008610;GO:0009058;GO:0009987;GO:0019637;GO:0042214;GO:0044237;GO:0044238;GO:0044249;GO:0044255;GO:0045338;GO:0046246;GO:0051761;GO:0051762;GO:0071704;GO:1901576;	NA	(-)-germacrene D synthase-like	(-)-germacrene D synthase-like
Cla97C10G188480	2298	12.4209	1.25827	-3.29842	0.000641623	0.00401357	Down	NA	NA	NA	NA	NA	PA domain	subtilisin-like protease SBT5.3
Cla97C10G188490	2127	4.19058	0	-4.5812	0.00629998	0.0280422	Down	NA	NA	NA	NA	NA	PA domain	Subtilisin-like protease SBT5.3
Cla97C10G188540	1860	176.352	58.9995	-1.5782	1.15e-16	4.22e-15	Down	NA	NA	NA	NA	NA	PA domain	subtilisin-like protease SBT5.3
Cla97C10G189530	684	21.9628	2.24532	-3.30179	1.18e-05	0.000116837	Down	NA	NA	NA	NA	NA	Belongs to the 'GDSL' lipolytic enzyme family	GDSL esterase/lipase
Cla97C10G189600	558	50.0824	22.1417	-1.17365	0.000488719	0.00314783	Down	K09022 ridA, tdcF, RIDA; 2-iminobutanoate/2-iminopropanoate deaminase [EC:3.5.99.10]	NA	GO:0003674;GO:0003824;GO:0016787;GO:0019239;	GO:0006082;GO:0006520;GO:0006807;GO:0008150;GO:0008152;GO:0008652;GO:0009058;GO:0009081;GO:0009082;GO:0009987;GO:0010035;GO:0010038;GO:0016053;GO:0019752;GO:0042221;GO:0043436;GO:0044237;GO:0044238;GO:0044249;GO:0044281;GO:0044283;GO:0046394;GO:0046686;GO:0050896;GO:0071704;GO:1901564;GO:1901566;GO:1901576;	GO:0005575;GO:0005622;GO:0005623;GO:0005737;GO:0005739;GO:0005773;GO:0009507;GO:0009526;GO:0009532;GO:0009536;GO:0009570;GO:0009579;GO:0009941;GO:0031967;GO:0031975;GO:0043226;GO:0043227;GO:0043229;GO:0043231;GO:0044422;GO:0044424;GO:0044434;GO:0044435;GO:0044444;GO:0044446;GO:0044464;	Ribonuclease UK114-like	2-iminobutanoate/2-iminopropanoate deaminase-like
Cla97C10G190590	909	891.501	158.064	-2.4954	1.61e-136	5.08e-134	Down	NA	NA	GO:0003674;GO:0003700;GO:0140110;	GO:0001101;GO:0006355;GO:0006950;GO:0007154;GO:0007165;GO:0008150;GO:0009414;GO:0009415;GO:0009628;GO:0009719;GO:0009725;GO:0009753;GO:0009755;GO:0009867;GO:0009889;GO:0009987;GO:0010033;GO:0010035;GO:0010468;GO:0010556;GO:0019219;GO:0019222;GO:0023052;GO:0031323;GO:0031326;GO:0032870;GO:0042221;GO:0050789;GO:0050794;GO:0050896;GO:0051171;GO:0051252;GO:0051716;GO:0060255;GO:0065007;GO:0070887;GO:…	NA	NAC domain-containing protein	NAC domain-containing protein
Cla97C10G190620	351	69.7923	30.4852	-1.19524	2.52e-05	0.000231275	Down	NA	NA	NA	NA	NA	Thaumatin family	Thaumatin-like protein
Cla97C10G191220	573	5477.7	22.5615	-7.92727	0	0	Down	K13993 HSP20; HSP20 family protein	ko04141:Protein processing in endoplasmic reticulum	NA	NA	NA	Belongs to the small heat shock protein (HSP20) family	Heat-shock protein
Cla97C10G191780	795	184.518	88.6635	-1.05682	4e-10	8.04e-09	Down	NA	NA	NA	NA	NA	dof zinc finger protein	dof zinc finger protein DOF5.7
Cla97C10G192480	918	3220.35	1000.87	-1.68628	2.94e-152	1.1e-149	Down	NA	NA	NA	GO:0002239;GO:0008150;GO:0009605;GO:0009607;GO:0043207;GO:0050896;GO:0051704;GO:0051707;	GO:0005575;GO:0005618;GO:0005622;GO:0005623;GO:0005737;GO:0005794;GO:0005829;GO:0005911;GO:0009505;GO:0009506;GO:0012505;GO:0016020;GO:0030054;GO:0030312;GO:0043226;GO:0043227;GO:0043229;GO:0043231;GO:0044424;GO:0044444;GO:0044464;GO:0055044;GO:0071944;	Phosphate-induced protein 1 conserved region	protein EXORDIUM-like 2
Cla97C10G192580	1065	128.787	31.3989	-2.03575	4.02e-18	1.67e-16	Down	NA	NA	NA	NA	NA	Belongs to the iron ascorbate-dependent oxidoreductase family	protein DMR6-LIKE OXYGENASE 2-like
Cla97C10G192660	396	42.2278	13.3538	-1.65894	3.42e-05	0.000304119	Down	NA	NA	NA	NA	NA	NA	Proline-rich receptor-like protein kinase PERK2
Cla97C10G193050	1719	267.186	128.745	-1.05236	2.67e-12	6.74e-11	Down	K25380 EGY; zinc metalloprotease EGY, chloroplastic [EC:3.4.24.-]	NA	NA	GO:0000302;GO:0006950;GO:0006979;GO:0008150;GO:0009266;GO:0009314;GO:0009408;GO:0009416;GO:0009628;GO:0009636;GO:0009642;GO:0009644;GO:0010035;GO:0042221;GO:0042493;GO:0042542;GO:0046677;GO:0050896;GO:1901700;	NA	zinc metallopeptidase EGY3, chloroplastic	ethylene-dependent gravitropism-deficient and yellow-green-like 3
Cla97C10G193540	954	80.3591	23.8268	-1.75259	3.23e-09	5.69e-08	Down	NA	NA	GO:0003674;GO:0003824;GO:0016491;GO:0016705;GO:0016706;GO:0016707;GO:0051213;	GO:0001101;GO:0006082;GO:0006629;GO:0006720;GO:0006721;GO:0006790;GO:0006807;GO:0007154;GO:0007165;GO:0008150;GO:0008152;GO:0008299;GO:0008610;GO:0009058;GO:0009314;GO:0009416;GO:0009628;GO:0009685;GO:0009686;GO:0009719;GO:0009725;GO:0009739;GO:0009740;GO:0009755;GO:0009987;GO:0010033;GO:0010476;GO:0010817;GO:0016053;GO:0016101;GO:0016102;GO:0016114;GO:0016143;GO:0016144;GO:0019748;GO:0019752;GO:…	GO:0005575;GO:0016020;	Belongs to the iron ascorbate-dependent oxidoreductase family	2-oxoglutarate (2OG) and Fe(II)-dependent oxygenase superfamily protein
Cla97C10G193910	951	38.9647	18.6263	-1.05881	0.0053026	0.0242168	Down	NA	NA	GO:0000287;GO:0003674;GO:0003824;GO:0004301;GO:0005102;GO:0005488;GO:0005515;GO:0015643;GO:0016787;GO:0016788;GO:0016791;GO:0016801;GO:0016803;GO:0042577;GO:0042578;GO:0042802;GO:0042803;GO:0043167;GO:0043169;GO:0046872;GO:0046983;	GO:0001676;GO:0003008;GO:0003013;GO:0003018;GO:0006082;GO:0006605;GO:0006625;GO:0006629;GO:0006631;GO:0006633;GO:0006690;GO:0006725;GO:0006793;GO:0006796;GO:0006805;GO:0006810;GO:0006873;GO:0006874;GO:0006875;GO:0006886;GO:0006950;GO:0006952;GO:0006954;GO:0006996;GO:0007031;GO:0008015;GO:0008104;GO:0008150;GO:0008152;GO:0008217;GO:0008610;GO:0009056;GO:0009058;GO:0009410;GO:0009636;GO:0009810;GO:…	GO:0005575;GO:0005622;GO:0005623;GO:0005737;GO:0005777;GO:0005782;GO:0005829;GO:0031907;GO:0031974;GO:0042579;GO:0043226;GO:0043227;GO:0043229;GO:0043231;GO:0043233;GO:0044422;GO:0044424;GO:0044438;GO:0044439;GO:0044444;GO:0044446;GO:0044464;GO:0070013;	epoxide hydrolase	bifunctional epoxide hydrolase 2-like
Cla97C10G194190	2307	551.287	248.011	-1.15303	1.5e-28	1e-26	Down	NA	NA	NA	NA	GO:0005575;GO:0005618;GO:0005623;GO:0009505;GO:0030312;GO:0044464;GO:0071944;	beta-D-xylosidase	Fn3_like domain-containing protein
Cla97C10G195490	417	133.827	66.21	-1.01221	6.18e-07	7.85e-06	Down	NA	NA	GO:0003674;GO:0003700;GO:0140110;	GO:0006355;GO:0008150;GO:0009888;GO:0009889;GO:0009891;GO:0009893;GO:0010087;GO:0010088;GO:0010089;GO:0010468;GO:0010556;GO:0010557;GO:0010604;GO:0010628;GO:0019219;GO:0019222;GO:0031323;GO:0031325;GO:0031326;GO:0031328;GO:0032502;GO:0045893;GO:0045935;GO:0048518;GO:0048522;GO:0048856;GO:0050789;GO:0050794;GO:0051171;GO:0051173;GO:0051252;GO:0051254;GO:0060255;GO:0065007;GO:0080090;GO:1902680;GO:…	GO:0005575;GO:0005622;GO:0005623;GO:0005634;GO:0043226;GO:0043227;GO:0043229;GO:0043231;GO:0044424;GO:0044464;	MYB-CC type transfactor, LHEQLE motif	myb family transcription factor PHL5-like
Cla97C10G195530	810	254.498	102.028	-1.31972	5.66e-18	2.31e-16	Down	K09338 HD-ZIP; homeobox-leucine zipper protein	NA	NA	NA	NA	Homeobox-leucine zipper protein	homeobox-leucine zipper protein HOX11-like
Cla97C10G195690	1563	685.162	191.985	-1.83553	3.32e-65	4.93e-63	Down	NA	NA	NA	NA	NA	NA	Unknown protein
Cla97C10G197830	474	39.9664	17.1178	-1.2243	0.000901106	0.0053768	Down	NA	NA	NA	NA	NA	NA	GOLD domain-containing protein
Cla97C10G197910	444	162.872	71.9316	-1.17724	2.37e-10	4.89e-09	Down	K09874 NIP; aquaporin NIP	NA	NA	GO:0006810;GO:0008150;GO:0015840;GO:0019755;GO:0042886;GO:0051179;GO:0051234;GO:0071702;GO:0071705;	NA	Belongs to the MIP aquaporin (TC 1.A.8) family	aquaporin NIP2-1-like
Cla97C10G198100	798	1053.65	51.638	-4.34945	5.65e-219	3.35e-216	Down	NA	NA	NA	NA	NA	(NAC) domain-containing protein	NAC domain-containing protein
Cla97C10G198360	1740	4.26594	0	-4.6011	0.00552121	0.0250677	Down	NA	NA	NA	NA	NA	Protein of unknown function (DUF1336)	DUF1336 domain-containing protein
Cla97C10G199270	1179	228.946	109.045	-1.06874	4.65e-10	9.24e-09	Down	NA	NA	NA	NA	NA	WAT1-related protein	WAT1-related protein
Cla97C10G200540	1056	7306.03	3172.98	-1.20281	4.2e-157	1.63e-154	Down	K26216 AHSA1, AHA1; activator of Hsp90 ATPase protein 1	NA	GO:0001671;GO:0003674;GO:0005488;GO:0005515;GO:0008047;GO:0030234;GO:0031072;GO:0051087;GO:0051879;GO:0060589;GO:0060590;GO:0098772;	GO:0008150;GO:0032781;GO:0043085;GO:0043462;GO:0044093;GO:0050790;GO:0051336;GO:0051345;GO:0065007;GO:0065009;	GO:0005575;GO:0005622;GO:0005623;GO:0005737;GO:0005829;GO:0044424;GO:0044444;GO:0044464;	Activator of 90 kDa heat shock protein	activator of 90 kDa heat shock protein ATPase homolog 1
Cla97C10G200730	1017	224.123	104.073	-1.10758	6.29e-12	1.54e-10	Down	NA	NA	GO:0003674;GO:0005488;GO:0005515;GO:0019899;GO:0031625;GO:0044389;	GO:0006508;GO:0006511;GO:0006807;GO:0008150;GO:0008152;GO:0009056;GO:0009057;GO:0009966;GO:0009968;GO:0009987;GO:0010498;GO:0010646;GO:0010648;GO:0019222;GO:0019538;GO:0019941;GO:0023051;GO:0023057;GO:0030162;GO:0030163;GO:0031323;GO:0043161;GO:0043170;GO:0043455;GO:0043632;GO:0044237;GO:0044238;GO:0044248;GO:0044257;GO:0044260;GO:0044265;GO:0044267;GO:0048519;GO:0048523;GO:0048583;GO:0048585;GO:…	GO:0000151;GO:0005575;GO:0005622;GO:0005623;GO:0005737;GO:0005829;GO:0019005;GO:0031461;GO:0032991;GO:0044424;GO:0044444;GO:0044464;GO:1902494;GO:1990234;	F-box kelch-repeat protein	F-box/kelch-repeat protein
Cla97C10G200740	639	1523.49	679.4	-1.16611	9.74e-55	1.21e-52	Down	K12900 SRSF10, FUSIP1; serine/arginine-rich splicing factor 10	ko03040:Spliceosome	GO:0003674;GO:0005488;GO:0005515;GO:0019904;GO:0050733;GO:0051082;	GO:0000244;GO:0000245;GO:0000375;GO:0000377;GO:0000381;GO:0000387;GO:0000395;GO:0000398;GO:0006139;GO:0006376;GO:0006396;GO:0006397;GO:0006725;GO:0006807;GO:0008150;GO:0008152;GO:0008380;GO:0009892;GO:0009987;GO:0010467;GO:0010468;GO:0010605;GO:0010629;GO:0016043;GO:0016070;GO:0016071;GO:0019219;GO:0019222;GO:0022607;GO:0022613;GO:0022618;GO:0031323;GO:0031324;GO:0033119;GO:0034622;GO:0034641;GO:…	GO:0005575;GO:0005622;GO:0005623;GO:0005634;GO:0005654;GO:0031974;GO:0031981;GO:0043226;GO:0043227;GO:0043229;GO:0043231;GO:0043233;GO:0044422;GO:0044424;GO:0044428;GO:0044446;GO:0044464;GO:0070013;	serine arginine-rich splicing factor	serine/arginine-rich SC35-like splicing factor SCL33
Cla97C10G201290	1371	26.1136	9.46657	-1.45532	0.00330873	0.0163181	Down	K25841 ALMT; aluminum-activated malate transporter family protein	NA	GO:0003674;GO:0005215;GO:0005310;GO:0005342;GO:0008509;GO:0008514;GO:0015075;GO:0015140;GO:0015318;GO:0015556;GO:0022857;GO:0046943;	GO:0006810;GO:0006811;GO:0006820;GO:0006835;GO:0008150;GO:0015711;GO:0015740;GO:0015743;GO:0015849;GO:0034220;GO:0046942;GO:0051179;GO:0051234;GO:0055085;GO:0071423;GO:0071702;GO:0098656;GO:1903825;GO:1905039;	GO:0000325;GO:0005575;GO:0005622;GO:0005623;GO:0005737;GO:0005773;GO:0005774;GO:0009705;GO:0016020;GO:0031090;GO:0043226;GO:0043227;GO:0043229;GO:0043231;GO:0044422;GO:0044424;GO:0044437;GO:0044444;GO:0044446;GO:0044464;GO:0098588;GO:0098805;	Aluminum-activated malate transporter	aluminum-activated malate transporter 8-like
Cla97C10G202550	441	1824.19	82.3903	-4.46891	0	0	Down	NA	NA	NA	NA	NA	NA	Unknown protein
Cla97C10G202850	699	44.8013	11.6865	-1.93092	2.27e-06	2.59e-05	Down	K01166 RNASET2; ribonuclease T2 [EC:4.6.1.19]	NA	NA	NA	NA	ribonuclease T2 activity	Ribonuclease T(2)
Cla97C10G203070	762	907.991	240.96	-1.91526	3.36e-87	6.65e-85	Down	K09873 TIP; aquaporin TIP	NA	GO:0003674;GO:0005215;GO:0005372;GO:0015204;GO:0015250;GO:0015267;GO:0015318;GO:0022803;GO:0022838;GO:0022857;GO:0042887;	GO:0006810;GO:0006811;GO:0006833;GO:0006855;GO:0008150;GO:0015840;GO:0015893;GO:0019755;GO:0034220;GO:0042044;GO:0042221;GO:0042493;GO:0042886;GO:0042891;GO:0050896;GO:0051179;GO:0051181;GO:0051234;GO:0055085;GO:0071702;GO:0071705;GO:0071918;GO:0080170;	GO:0000322;GO:0000325;GO:0000326;GO:0005575;GO:0005622;GO:0005623;GO:0005737;GO:0005773;GO:0005774;GO:0005886;GO:0005887;GO:0009507;GO:0009526;GO:0009536;GO:0009705;GO:0009941;GO:0016020;GO:0016021;GO:0031090;GO:0031224;GO:0031226;GO:0031967;GO:0031975;GO:0042807;GO:0043226;GO:0043227;GO:0043229;GO:0043231;GO:0044422;GO:0044424;GO:0044425;GO:0044434;GO:0044435;GO:0044437;GO:0044444;GO:0044446;GO:…	Belongs to the MIP aquaporin (TC 1.A.8) family	aquaporin TIP1-1-like
Cla97C10G203560	1482	29.905	7.01321	-2.1018	4.28e-05	0.000371321	Down	K25870 IDD3S; zinc finger protein IDD3/4/5/6/7/8/9/10/11/12/13	NA	GO:0003674;GO:0003700;GO:0140110;	GO:0006355;GO:0008150;GO:0009889;GO:0010468;GO:0010556;GO:0019219;GO:0019222;GO:0031323;GO:0031326;GO:0050789;GO:0050794;GO:0051171;GO:0051252;GO:0060255;GO:0065007;GO:0080090;GO:1903506;GO:2000112;GO:2001141;GO:0008152;GO:0006139;GO:0006351;GO:0006725;GO:0006807;GO:0009058;GO:0009059;GO:0009987;GO:0010467;GO:0016070;GO:0018130;GO:0019438;GO:0032774;GO:0034641;GO:0034645;GO:0034654;GO:0043170;GO:…	GO:0005575;GO:0005622;GO:0005623;GO:0005634;GO:0043226;GO:0043227;GO:0043229;GO:0043231;GO:0044424;GO:0044464;	ZINC FINGER protein	C2H2-type domain-containing protein
Cla97C10G204820	432	174.117	45.963	-1.92153	5.15e-22	2.59e-20	Down	NA	NA	NA	NA	NA	expressed protein	Encodes a protein involved in salt tolerance, names SIS (Salt Induced Serine rich).
Cla97C10G204860	1044	269.233	92.9179	-1.53625	3.93e-24	2.23e-22	Down	NA	NA	NA	NA	NA	expressed protein	TIP41-like protein
Cla97C10G205380	711	33.0377	14.6254	-1.18301	0.00415283	0.0197245	Down	K23978 IAH1; isoamyl acetate esterase [EC:3.1.1.112]	NA	NA	NA	NA	GDSL esterase lipase	GDSL esterase/lipase
Cla97C10G205680	504	69.4988	19.0322	-1.86793	1.92e-09	3.52e-08	Down	NA	NA	NA	NA	NA	UPF0098 protein	UPF0098 protein
Cla97C10G205730	621	88.9712	44.3741	-1.00915	9.57e-05	0.00076286	Down	K14496 PYL; abscisic acid receptor PYR/PYL family	ko04016:MAPK signaling pathway - plant|ko04075:Plant hormone signal transduction	NA	NA	NA	Abscisic acid receptor	abscisic acid receptor PYL4-like
Cla97C10G206060	1542	28.7884	11.998	-1.25657	0.00538655	0.0245557	Down	K03327 TC.MATE, SLC47A, norM, mdtK, dinF; multidrug resistance protein, MATE family	NA	GO:0003674;GO:0005215;GO:0015238;GO:0022857;	GO:0006810;GO:0006855;GO:0008150;GO:0015893;GO:0042221;GO:0042493;GO:0050896;GO:0051179;GO:0051234;GO:0055085;	NA	Belongs to the multi antimicrobial extrusion (MATE) (TC 2.A.66.1) family	Protein DETOXIFICATION
Cla97C10G206300	582	8.7581	0	-5.63183	0.000118604	0.000921887	Down	NA	NA	NA	NA	NA	LURP-one-related	protein LURP-one-related 8
Cla97C11G206510	1785	25.498	10.7788	-1.24111	0.00930466	0.0384806	Down	NA	NA	GO:0003674;GO:0003824;GO:0004857;GO:0016787;GO:0016788;GO:0030234;GO:0030599;GO:0046910;GO:0052689;GO:0098772;	GO:0008150;GO:0043086;GO:0044092;GO:0050790;GO:0065007;GO:0065009;	GO:0005575;GO:0005623;GO:0044464;GO:0071944;	pectinesterase	Pectinesterase
Cla97C11G208900	912	273.403	67.6588	-2.0136	1.57e-30	1.1e-28	Down	K09419 HSFF; heat shock transcription factor, other eukaryote	NA	GO:0003674;GO:0003700;GO:0140110;	GO:0001101;GO:0006355;GO:0006950;GO:0006970;GO:0008150;GO:0009628;GO:0009719;GO:0009725;GO:0009737;GO:0009889;GO:0010033;GO:0010468;GO:0010556;GO:0019219;GO:0019222;GO:0031323;GO:0031326;GO:0033993;GO:0042221;GO:0050789;GO:0050794;GO:0050896;GO:0051171;GO:0051252;GO:0060255;GO:0065007;GO:0080090;GO:0097305;GO:1901700;GO:1903506;GO:2000112;GO:2001141;GO:0008152;GO:0006139;GO:0006351;GO:0006725;GO:…	GO:0005575;GO:0005622;GO:0005623;GO:0005634;GO:0043226;GO:0043227;GO:0043229;GO:0043231;GO:0044424;GO:0044464;	Heat Stress Transcription Factor	heat stress transcription factor C-1-like
Cla97C11G208930	438	7845.77	178.415	-5.45857	0	0	Down	K03627 MBF1; putative transcription factor	NA	GO:0003674;GO:0003700;GO:0003712;GO:0003713;GO:0140110;	GO:0000160;GO:0001101;GO:0006355;GO:0006950;GO:0007154;GO:0007165;GO:0008150;GO:0009266;GO:0009408;GO:0009414;GO:0009415;GO:0009628;GO:0009719;GO:0009723;GO:0009725;GO:0009737;GO:0009755;GO:0009873;GO:0009889;GO:0009891;GO:0009893;GO:0009987;GO:0010033;GO:0010035;GO:0010468;GO:0010556;GO:0010557;GO:0010604;GO:0010628;GO:0019219;GO:0019222;GO:0023052;GO:0031323;GO:0031325;GO:0031326;GO:0031328;GO:…	GO:0005575;GO:0005622;GO:0005623;GO:0005634;GO:0005730;GO:0005737;GO:0031974;GO:0031981;GO:0043226;GO:0043227;GO:0043228;GO:0043229;GO:0043231;GO:0043232;GO:0043233;GO:0044422;GO:0044424;GO:0044428;GO:0044446;GO:0044464;GO:0070013;	Multiprotein-bridging factor	multiprotein-bridging factor 1c
Cla97C11G209280	1560	292.873	145.047	-1.01597	1.38e-12	3.59e-11	Down	K15639 CYP734A1, BAS1; PHYB activation tagged suppressor 1 [EC:1.14.-.-]	ko00905:Brassinosteroid biosynthesis	GO:0003674;GO:0003824;GO:0004497;GO:0008395;GO:0016491;	GO:0006629;GO:0008150;GO:0008152;GO:0008202;GO:0009719;GO:0009725;GO:0009741;GO:0010033;GO:0010268;GO:0010817;GO:0014070;GO:0016128;GO:0016131;GO:0033993;GO:0042221;GO:0042445;GO:0042592;GO:0044238;GO:0048878;GO:0050896;GO:0055088;GO:0055114;GO:0065007;GO:0065008;GO:0071704;GO:1901360;GO:1901615;GO:1901700;	NA	Cytochrome p450	Cytochrome P450
Cla97C11G209530	867	925.194	442.943	-1.06191	2.3e-40	2.22e-38	Down	NA	NA	NA	GO:0006950;GO:0007154;GO:0008150;GO:0009267;GO:0009605;GO:0009987;GO:0009991;GO:0010646;GO:0010647;GO:0016036;GO:0031667;GO:0031668;GO:0031669;GO:0032101;GO:0032103;GO:0032104;GO:0032106;GO:0032107;GO:0032109;GO:0033554;GO:0042594;GO:0048518;GO:0048522;GO:0048583;GO:0048584;GO:0050789;GO:0050794;GO:0050896;GO:0051716;GO:0065007;GO:0071496;GO:0080040;GO:0080134;GO:0080135;GO:0140255;	GO:0005575;GO:0005622;GO:0005623;GO:0005634;GO:0005737;GO:0005783;GO:0012505;GO:0043226;GO:0043227;GO:0043229;GO:0043231;GO:0044424;GO:0044444;GO:0044464;	SPX domain-containing protein	SPX domain-containing protein
Cla97C11G210320	351	23.8932	8.24607	-1.53756	0.00386571	0.0186281	Down	NA	NA	NA	NA	NA	auxin-induced protein	auxin-responsive protein SAUR24-like
Cla97C11G211380	828	924.782	196.071	-2.23784	7.38e-113	1.89e-110	Down	NA	NA	NA	NA	NA	Uncharacterized ACR, COG1678	UPF0301 protein
Cla97C11G211700	1002	131.675	61.1502	-1.10488	4.39e-08	6.68e-07	Down	NA	NA	NA	NA	NA	PI-PLC X domain-containing protein	PI-PLC X domain-containing protein At5g67130
Cla97C11G211890	555	343.456	155.42	-1.14476	1.97e-19	8.69e-18	Down	NA	NA	GO:0003674;GO:0003700;GO:0140110;	GO:0006355;GO:0008150;GO:0009889;GO:0010468;GO:0010556;GO:0019219;GO:0019222;GO:0031323;GO:0031326;GO:0050789;GO:0050794;GO:0051171;GO:0051252;GO:0060255;GO:0065007;GO:0080090;GO:1903506;GO:2000112;GO:2001141;GO:0008152;GO:0006139;GO:0006351;GO:0006725;GO:0006807;GO:0009058;GO:0009059;GO:0009987;GO:0010467;GO:0016070;GO:0018130;GO:0019438;GO:0032774;GO:0034641;GO:0034645;GO:0034654;GO:0043170;GO:…	GO:0005575;GO:0005622;GO:0005623;GO:0005634;GO:0043226;GO:0043227;GO:0043229;GO:0043231;GO:0044424;GO:0044464;	Ocs element-binding factor	basic leucine zipper 43-like
Cla97C11G212390	1560	50.6774	23.1154	-1.1273	0.000884681	0.00529445	Down	K10717 CYP735A; cytokinin trans-hydroxylase	ko00908:Zeatin biosynthesis	GO:0003674;GO:0003824;GO:0004497;GO:0016491;	GO:0006725;GO:0006807;GO:0008150;GO:0008152;GO:0009058;GO:0009308;GO:0009690;GO:0009691;GO:0009987;GO:0010817;GO:0018130;GO:0019438;GO:0033397;GO:0033398;GO:0033400;GO:0033466;GO:0034641;GO:0034754;GO:0042445;GO:0042446;GO:0044237;GO:0044249;GO:0044271;GO:0046483;GO:0055114;GO:0065007;GO:0065008;GO:0071704;GO:0072521;GO:0072522;GO:1901360;GO:1901362;GO:1901564;GO:1901566;GO:1901576;	GO:0005575;GO:0005911;GO:0009506;GO:0030054;GO:0055044;	Cytokinin hydroxylase-like	Cytochrome P450
Cla97C11G212690	696	35.0864	16.811	-1.06321	0.00564136	0.0255615	Down	NA	NA	NA	NA	NA	NA	TPRXL protein
Cla97C11G212900	1245	153.381	30.3893	-2.3357	4.3e-24	2.43e-22	Down	K09286 EREBP; EREBP-like factor	NA	GO:0001067;GO:0003674;GO:0003676;GO:0003677;GO:0003700;GO:0005488;GO:0043565;GO:0044212;GO:0097159;GO:0140110;GO:1901363;	GO:0001101;GO:0006355;GO:0006950;GO:0008150;GO:0009266;GO:0009408;GO:0009628;GO:0009719;GO:0009725;GO:0009737;GO:0009889;GO:0009891;GO:0009893;GO:0010033;GO:0010286;GO:0010468;GO:0010556;GO:0010557;GO:0010604;GO:0010628;GO:0019219;GO:0019222;GO:0031323;GO:0031325;GO:0031326;GO:0031328;GO:0033993;GO:0042221;GO:0045893;GO:0045935;GO:0048518;GO:0048522;GO:0050789;GO:0050794;GO:0050896;GO:0051171;GO:…	GO:0005575;GO:0005622;GO:0005623;GO:0005634;GO:0043226;GO:0043227;GO:0043229;GO:0043231;GO:0044424;GO:0044464;	Dehydration-responsive element-binding protein	Dehydration-responsive element-binding protein 2C
Cla97C11G212910	618	187.017	54.3616	-1.78303	4.95e-18	2.04e-16	Down	K14496 PYL; abscisic acid receptor PYR/PYL family	ko04016:MAPK signaling pathway - plant|ko04075:Plant hormone signal transduction	NA	NA	NA	Abscisic acid receptor	abscisic acid receptor PYL4-like
Cla97C11G212930	282	17.3227	5.69968	-1.59672	0.00946612	0.0390603	Down	NA	NA	NA	NA	NA	NA	Unknown protein
Cla97C11G213310	1551	180.743	60.9158	-1.5704	1.45e-15	4.85e-14	Down	NA	NA	NA	GO:0000902;GO:0000904;GO:0008150;GO:0008152;GO:0009058;GO:0009059;GO:0009653;GO:0009888;GO:0009987;GO:0010026;GO:0010090;GO:0010143;GO:0016043;GO:0030154;GO:0032502;GO:0032989;GO:0043170;GO:0048468;GO:0048856;GO:0048869;GO:0051179;GO:0071704;GO:0071840;GO:0090558;GO:0090626;GO:1901576;	GO:0005575;GO:0005622;GO:0005623;GO:0005737;GO:0044424;GO:0044464;	Transferase family	HXXXD-type acyl-transferase family protein
Cla97C11G213940	2055	31.4292	13.3344	-1.23675	0.00356057	0.0173734	Down	NA	NA	GO:0003674;GO:0003824;GO:0004672;GO:0004674;GO:0004675;GO:0004888;GO:0016301;GO:0016740;GO:0016772;GO:0016773;GO:0019199;GO:0038023;GO:0060089;GO:0140096;	GO:0006464;GO:0006468;GO:0006793;GO:0006796;GO:0006807;GO:0007154;GO:0007165;GO:0007166;GO:0007167;GO:0007178;GO:0008150;GO:0008152;GO:0009987;GO:0016310;GO:0019538;GO:0023052;GO:0036211;GO:0043170;GO:0043412;GO:0044237;GO:0044238;GO:0044260;GO:0044267;GO:0050789;GO:0050794;GO:0050896;GO:0051716;GO:0065007;GO:0071704;GO:1901564;	GO:0005575;GO:0005623;GO:0005886;GO:0016020;GO:0044464;GO:0071944;	LysM domain	protein LYK2
Cla97C11G214380	627	173.02	34.1317	-2.34065	0.00966984	0.0397466	Down	NA	NA	NA	NA	NA	NA	Inactive ubiquitin carboxyl-terminal hydrolase 54
Cla97C11G214890	1419	10.6682	0	-5.92453	3.36e-05	0.000299759	Down	K26385 LHT; lysine histidine transporter	NA	GO:0003674;GO:0005215;GO:0005342;GO:0008509;GO:0008514;GO:0015075;GO:0015171;GO:0015318;GO:0022857;GO:0046943;	GO:0003333;GO:0006810;GO:0006811;GO:0006820;GO:0006865;GO:0008150;GO:0015711;GO:0015849;GO:0034220;GO:0046942;GO:0051179;GO:0051234;GO:0055085;GO:0071702;GO:0071705;GO:0098656;GO:1903825;GO:1905039;	GO:0005575;GO:0005623;GO:0005886;GO:0016020;GO:0044464;GO:0071944;	Lysine histidine transporter-like	lysine histidine transporter-like 5
Cla97C11G216290	1359	7.49291	0	-5.42731	0.000340608	0.00231265	Down	NA	NA	NA	NA	NA	phytochrome kinase substrate	protein PHYTOCHROME KINASE SUBSTRATE 1
Cla97C11G216370	324	20.8294	0.635165	-5.03883	1.02e-05	0.000102516	Down	K15382 SLC50A, SWEET; solute carrier family 50 (sugar transporter)	NA	GO:0003674;GO:0005215;GO:0008515;GO:0015144;GO:0015154;GO:0015157;GO:0022857;GO:0051119;	GO:0006810;GO:0008150;GO:0008643;GO:0015766;GO:0015770;GO:0015772;GO:0034219;GO:0046903;GO:0051179;GO:0051234;GO:0055085;GO:0071702;GO:0071836;	GO:0000139;GO:0005575;GO:0005622;GO:0005623;GO:0005737;GO:0005794;GO:0005802;GO:0005886;GO:0005887;GO:0012505;GO:0012506;GO:0016020;GO:0016021;GO:0031090;GO:0031224;GO:0031226;GO:0031982;GO:0031984;GO:0032588;GO:0043226;GO:0043227;GO:0043229;GO:0043231;GO:0044422;GO:0044424;GO:0044425;GO:0044431;GO:0044444;GO:0044446;GO:0044459;GO:0044464;GO:0071944;GO:0098588;GO:0098791;	Mediates both low-affinity uptake and efflux of sugar across the membrane	Bidirectional sugar transporter SWEET
Cla97C11G217390	1941	565.75	35.7536	-3.98197	1.73e-121	4.84e-119	Down	K03283 HSPA1s; heat shock 70kDa protein 1/2/6/8	ko03040:Spliceosome|ko04141:Protein processing in endoplasmic reticulum|ko04144:Endocytosis	NA	NA	NA	heat shock	heat shock 70 kDa protein
Cla97C11G217790	1230	38.0013	4.43983	-3.09753	3.64e-09	6.37e-08	Down	K22285 OSBPL8, ORP8; oxysterol-binding protein-related protein 8	NA	NA	NA	NA	Belongs to the OSBP family	oxysterol-binding protein-related protein 4C-like
Cla97C11G218400	855	55.6244	22.5199	-1.30313	0.000177379	0.00130345	Down	K08235 E2.4.1.207; xyloglucan:xyloglucosyl transferase [EC:2.4.1.207]	NA	NA	NA	GO:0005575;GO:0005618;GO:0005622;GO:0005623;GO:0005737;GO:0005794;GO:0012505;GO:0030312;GO:0043226;GO:0043227;GO:0043229;GO:0043231;GO:0044424;GO:0044444;GO:0044464;GO:0071944;	Catalyzes xyloglucan endohydrolysis (XEH) and or endotransglycosylation (XET). Cleaves and religates xyloglucan polymers, an essential constituent of the primary cell wall, and thereby participates in cell wall construction of growing tissues	Xyloglucan endotransglucosylase/hydrolase
Cla97C11G223290	318	32.0431	4.78568	-2.74932	5.76e-07	7.36e-06	Down	NA	NA	GO:0003674;GO:0003824;GO:0004672;GO:0004674;GO:0016301;GO:0016740;GO:0016772;GO:0016773;GO:0140096;	GO:0002376;GO:0002682;GO:0006464;GO:0006468;GO:0006793;GO:0006796;GO:0006807;GO:0006950;GO:0006952;GO:0006955;GO:0008150;GO:0008152;GO:0009605;GO:0009607;GO:0009611;GO:0009814;GO:0009861;GO:0009987;GO:0016310;GO:0019538;GO:0031347;GO:0036211;GO:0043170;GO:0043207;GO:0043412;GO:0044237;GO:0044238;GO:0044260;GO:0044267;GO:0045087;GO:0045088;GO:0048583;GO:0050776;GO:0050789;GO:0050896;GO:0051704;GO:…	GO:0005575;GO:0005623;GO:0005886;GO:0005911;GO:0009506;GO:0016020;GO:0030054;GO:0044464;GO:0055044;GO:0071944;	leucine-rich repeat receptor-like serine threonine-protein kinase	Non-specific serine/threonine protein kinase
Cla97C11G223430	387	76.4764	20.7189	-1.89145	1.29e-08	2.09e-07	Down	NA	NA	NA	NA	NA	NA	histidine-rich glycoprotein-like
Cla97C11G223810	1239	3070.92	555.232	-2.46732	0	0	Down	K00815 TAT; tyrosine aminotransferase [EC:2.6.1.5]	ko00130:Ubiquinone and other terpenoid-quinone biosynthesis|ko00270:Cysteine and methionine metabolism|ko00350:Tyrosine metabolism|ko00360:Phenylalanine metabolism|ko00400:Phenylalanine, tyrosine and tryptophan biosynthesis|ko00950:Isoquinoline alkaloid biosynthesis|ko00960:Tropane, piperidine and pyridine alkaloid biosynthesis	GO:0003674;GO:0003824;GO:0004838;GO:0008483;GO:0016740;GO:0016769;GO:0070547;	GO:0006082;GO:0006520;GO:0006570;GO:0006572;GO:0006725;GO:0006766;GO:0006775;GO:0006807;GO:0008150;GO:0008152;GO:0009056;GO:0009058;GO:0009063;GO:0009072;GO:0009074;GO:0009110;GO:0009987;GO:0010189;GO:0016054;GO:0018130;GO:0019439;GO:0019752;GO:0042360;GO:0042362;GO:0043436;GO:0044237;GO:0044238;GO:0044248;GO:0044249;GO:0044281;GO:0044282;GO:0044283;GO:0046395;GO:0046483;GO:0071704;GO:1901360;GO:…	GO:0005575;GO:0005622;GO:0005623;GO:0005737;GO:0005829;GO:0044424;GO:0044444;GO:0044464;	Aminotransferase	Aminotran_1_2 domain-containing protein
Cla97C11G224420	966	551.069	103.314	-2.41677	7.29e-69	1.19e-66	Down	NA	NA	GO:0003674;GO:0003700;GO:0140110;	GO:0001101;GO:0006355;GO:0006950;GO:0007154;GO:0007165;GO:0008150;GO:0009414;GO:0009415;GO:0009628;GO:0009719;GO:0009725;GO:0009753;GO:0009755;GO:0009867;GO:0009889;GO:0009987;GO:0010033;GO:0010035;GO:0010468;GO:0010556;GO:0019219;GO:0019222;GO:0023052;GO:0031323;GO:0031326;GO:0032870;GO:0042221;GO:0050789;GO:0050794;GO:0050896;GO:0051171;GO:0051252;GO:0051716;GO:0060255;GO:0065007;GO:0070887;GO:…	NA	NAC domain-containing protein	NAC domain-containing protein
Cla97C01G012640	171	379.679	0	-11.0835	0.00455663	0.0212818	Down	NA	NA	NA	NA	NA	NA	Unknown protein
Cla97C00G000380	1491	126.963	292.564	1.20305	4.76e-17	1.81e-15	Up	K11699 RDR, RDRP; RNA-dependent RNA polymerase [EC:2.7.7.48]	NA	NA	GO:0001101;GO:0006139;GO:0006396;GO:0006725;GO:0006807;GO:0008150;GO:0008152;GO:0009058;GO:0009605;GO:0009607;GO:0009615;GO:0009719;GO:0009725;GO:0009751;GO:0009892;GO:0009987;GO:0010025;GO:0010033;GO:0010166;GO:0010467;GO:0010468;GO:0010605;GO:0010608;GO:0010629;GO:0014070;GO:0016070;GO:0016246;GO:0016441;GO:0016458;GO:0019222;GO:0030422;GO:0031047;GO:0031050;GO:0034641;GO:0035194;GO:0040029;GO:…	NA	Probably involved in the RNA silencing pathway and required for the generation of small interfering RNAs (siRNAs)	RNA-dependent RNA polymerase
Cla97C01G001370	1047	57.625	219.466	1.93665	6.65e-26	4e-24	Up	K24028 DMR6, DLO; salicylic acid 3-hydroxylase [EC:1.14.11.-]	NA	NA	GO:0001101;GO:0002229;GO:0002239;GO:0006082;GO:0006725;GO:0006950;GO:0006952;GO:0007275;GO:0007568;GO:0008150;GO:0008152;GO:0009056;GO:0009605;GO:0009607;GO:0009617;GO:0009620;GO:0009696;GO:0009719;GO:0009725;GO:0009751;GO:0009987;GO:0010033;GO:0010150;GO:0010817;GO:0014070;GO:0016054;GO:0016999;GO:0017001;GO:0017144;GO:0018958;GO:0019336;GO:0019439;GO:0019752;GO:0032501;GO:0032502;GO:0032787;GO:…	NA	Belongs to the iron ascorbate-dependent oxidoreductase family	Protein DMR6-LIKE OXYGENASE 2-like
Cla97C01G005110	1320	18.1476	38.7876	1.09604	0.00504449	0.0232166	Up	NA	NA	GO:0003674;GO:0003824;GO:0004672;GO:0004674;GO:0004675;GO:0004888;GO:0016301;GO:0016740;GO:0016772;GO:0016773;GO:0019199;GO:0038023;GO:0060089;GO:0140096;	GO:0000003;GO:0001704;GO:0001706;GO:0003002;GO:0003006;GO:0006464;GO:0006468;GO:0006793;GO:0006796;GO:0006807;GO:0006810;GO:0006833;GO:0006950;GO:0007154;GO:0007165;GO:0007166;GO:0007167;GO:0007178;GO:0007275;GO:0007369;GO:0007389;GO:0007492;GO:0008104;GO:0008150;GO:0008152;GO:0009611;GO:0009653;GO:0009719;GO:0009725;GO:0009733;GO:0009734;GO:0009741;GO:0009742;GO:0009755;GO:0009790;GO:0009791;GO:…	GO:0005575;GO:0005618;GO:0005623;GO:0005886;GO:0009505;GO:0009531;GO:0016020;GO:0030312;GO:0044426;GO:0044462;GO:0044464;GO:0048226;GO:0071944;	LRR receptor-like serine threonine-protein kinase	receptor-like protein 12
Cla97C01G005560	639	223.939	502.695	1.17166	4.8e-25	2.79e-23	Up	NA	NA	GO:0003674;GO:0003700;GO:0140110;	GO:0000003;GO:0003006;GO:0006355;GO:0007275;GO:0007568;GO:0008150;GO:0009791;GO:0009838;GO:0009889;GO:0009908;GO:0009909;GO:0010150;GO:0010468;GO:0010556;GO:0019219;GO:0019222;GO:0022414;GO:0031323;GO:0031326;GO:0032501;GO:0032502;GO:0048366;GO:0048367;GO:0048437;GO:0048580;GO:0048608;GO:0048731;GO:0048827;GO:0048831;GO:0048856;GO:0050789;GO:0050793;GO:0050794;GO:0051171;GO:0051239;GO:0051252;GO:…	NA	MADS-box protein SOC1-like	MADS-box protein AGL42-like
Cla97C01G006770	3135	59.386	190.606	1.68947	4.93e-19	2.12e-17	Up	K11699 RDR, RDRP; RNA-dependent RNA polymerase [EC:2.7.7.48]	NA	NA	GO:0001101;GO:0006139;GO:0006396;GO:0006725;GO:0006807;GO:0008150;GO:0008152;GO:0009058;GO:0009605;GO:0009607;GO:0009615;GO:0009719;GO:0009725;GO:0009751;GO:0009892;GO:0009987;GO:0010025;GO:0010033;GO:0010166;GO:0010467;GO:0010468;GO:0010605;GO:0010608;GO:0010629;GO:0014070;GO:0016070;GO:0016246;GO:0016441;GO:0016458;GO:0019222;GO:0030422;GO:0031047;GO:0031050;GO:0034641;GO:0035194;GO:0040029;GO:…	NA	Probably involved in the RNA silencing pathway and required for the generation of small interfering RNAs (siRNAs)	RNA-dependent RNA polymerase
Cla97C01G006780	1410	583.274	1549.15	1.40826	2.06e-99	4.53e-97	Up	K14011 UBXN6, UBXD1; UBX domain-containing protein 6	ko04141:Protein processing in endoplasmic reticulum	NA	GO:0006508;GO:0006807;GO:0006810;GO:0006914;GO:0006950;GO:0006952;GO:0007034;GO:0007041;GO:0008150;GO:0008152;GO:0008333;GO:0009056;GO:0009057;GO:0009605;GO:0009607;GO:0009620;GO:0009987;GO:0010033;GO:0010243;GO:0010498;GO:0016192;GO:0016197;GO:0016236;GO:0019538;GO:0030163;GO:0032509;GO:0032510;GO:0033554;GO:0034976;GO:0036503;GO:0042221;GO:0043170;GO:0043207;GO:0044237;GO:0044238;GO:0044248;GO:…	GO:0000323;GO:0005575;GO:0005622;GO:0005623;GO:0005737;GO:0005764;GO:0005765;GO:0005768;GO:0005769;GO:0005770;GO:0005773;GO:0005774;GO:0005829;GO:0010008;GO:0012505;GO:0016020;GO:0019898;GO:0031090;GO:0031410;GO:0031901;GO:0031902;GO:0031982;GO:0032991;GO:0043226;GO:0043227;GO:0043229;GO:0043231;GO:0044422;GO:0044424;GO:0044425;GO:0044433;GO:0044437;GO:0044440;GO:0044444;GO:0044446;GO:0044464;GO:…	UBX domain-containing protein	UBX domain-containing protein
Cla97C01G006910	3363	20.44	43.7704	1.09449	0.00241896	0.0125235	Up	K11699 RDR, RDRP; RNA-dependent RNA polymerase [EC:2.7.7.48]	NA	NA	GO:0001101;GO:0006139;GO:0006396;GO:0006725;GO:0006807;GO:0008150;GO:0008152;GO:0009058;GO:0009605;GO:0009607;GO:0009615;GO:0009719;GO:0009725;GO:0009751;GO:0009892;GO:0009987;GO:0010025;GO:0010033;GO:0010166;GO:0010467;GO:0010468;GO:0010605;GO:0010608;GO:0010629;GO:0014070;GO:0016070;GO:0016246;GO:0016441;GO:0016458;GO:0019222;GO:0030422;GO:0031047;GO:0031050;GO:0034641;GO:0035194;GO:0040029;GO:…	NA	Probably involved in the RNA silencing pathway and required for the generation of small interfering RNAs (siRNAs)	RNA-dependent RNA polymerase
Cla97C01G007200	873	133.076	509.103	1.93188	2.04e-52	2.4e-50	Up	NA	NA	GO:0003674;GO:0005488;GO:0030246;	GO:0008150;GO:0009605;GO:0009607;GO:0009617;GO:0043207;GO:0050896;GO:0051704;GO:0051707;	GO:0005575;GO:0005622;GO:0005623;GO:0005737;GO:0005773;GO:0005774;GO:0016020;GO:0031090;GO:0043226;GO:0043227;GO:0043229;GO:0043231;GO:0044422;GO:0044424;GO:0044437;GO:0044444;GO:0044446;GO:0044464;GO:0098588;GO:0098805;	P-loop nucleoside triphosphate hydrolase superfamily protein	P-loop containing nucleoside triphosphate hydrolases superfamily protein
Cla97C01G008690	228	110.194	226.732	1.04006	4.34e-11	9.73e-10	Up	NA	NA	NA	NA	NA	NA	Unknown protein
Cla97C01G013280	1518	214.743	475.535	1.1499	8.6e-26	5.14e-24	Up	NA	NA	GO:0003674;GO:0003824;GO:0005215;GO:0008320;GO:0008565;GO:0016462;GO:0016787;GO:0016817;GO:0016818;GO:0016887;GO:0017111;GO:0022857;GO:0022884;GO:0042623;GO:0042887;GO:1904680;	GO:0006810;GO:0006996;GO:0007005;GO:0008104;GO:0008150;GO:0009987;GO:0015031;GO:0015833;GO:0016043;GO:0017004;GO:0017062;GO:0022607;GO:0033036;GO:0033108;GO:0034551;GO:0034622;GO:0042886;GO:0043933;GO:0044085;GO:0045184;GO:0051131;GO:0051179;GO:0051234;GO:0055085;GO:0065003;GO:0071702;GO:0071705;GO:0071806;GO:0071840;	GO:0005575;GO:0005622;GO:0005623;GO:0005737;GO:0005739;GO:0005740;GO:0005743;GO:0016020;GO:0019866;GO:0031090;GO:0031966;GO:0031967;GO:0031975;GO:0043226;GO:0043227;GO:0043229;GO:0043231;GO:0044422;GO:0044424;GO:0044429;GO:0044444;GO:0044446;GO:0044464;	Belongs to the AAA ATPase family	AAA-ATPase
Cla97C01G014990	579	5.58967	52.2852	3.22904	1.12e-11	2.68e-10	Up	NA	NA	GO:0003674;GO:0003700;GO:0140110;	GO:0001101;GO:0006355;GO:0006950;GO:0006952;GO:0007154;GO:0007165;GO:0008150;GO:0009605;GO:0009607;GO:0009617;GO:0009620;GO:0009719;GO:0009725;GO:0009753;GO:0009755;GO:0009867;GO:0009889;GO:0009987;GO:0010033;GO:0010468;GO:0010556;GO:0019219;GO:0019222;GO:0023052;GO:0031323;GO:0031326;GO:0032870;GO:0042221;GO:0042742;GO:0043207;GO:0050789;GO:0050794;GO:0050832;GO:0050896;GO:0051171;GO:0051252;GO:…	NA	WRKY transcription factor	WRKY domain-containing protein
Cla97C01G019250	1524	17.1307	34.792	1.02536	0.0125062	0.0491817	Up	K08900 BCS1; mitochondrial chaperone BCS1	NA	GO:0003674;GO:0003824;GO:0005488;GO:0005515;GO:0016462;GO:0016787;GO:0016817;GO:0016818;GO:0016887;GO:0017111;GO:0042623;GO:0042802;	GO:0001101;GO:0002237;GO:0002376;GO:0006950;GO:0006952;GO:0006955;GO:0006970;GO:0006996;GO:0007005;GO:0007154;GO:0007165;GO:0008150;GO:0008219;GO:0009314;GO:0009411;GO:0009416;GO:0009605;GO:0009607;GO:0009617;GO:0009626;GO:0009628;GO:0009651;GO:0009719;GO:0009725;GO:0009751;GO:0009863;GO:0009987;GO:0010033;GO:0012501;GO:0014070;GO:0016043;GO:0017004;GO:0017062;GO:0022607;GO:0023052;GO:0032870;GO:…	GO:0005575;GO:0005622;GO:0005623;GO:0005737;GO:0005739;GO:0005740;GO:0005741;GO:0005743;GO:0016020;GO:0019866;GO:0019867;GO:0031090;GO:0031966;GO:0031967;GO:0031968;GO:0031975;GO:0043226;GO:0043227;GO:0043229;GO:0043231;GO:0044422;GO:0044424;GO:0044429;GO:0044444;GO:0044446;GO:0044464;GO:0098588;GO:0098805;	Belongs to the AAA ATPase family	P-loop containing nucleoside triphosphate hydrolases superfamily protein
Cla97C01G020280	942	17.2747	80.4648	2.23076	5.76e-12	1.42e-10	Up	K20547 CHIB; basic endochitinase B [EC:3.2.1.14]	ko00520:Amino sugar and nucleotide sugar metabolism|ko04016:MAPK signaling pathway - plant	NA	NA	NA	Endochitinase-like	endochitinase-like
Cla97C01G022020	738	3.28339	17.0791	2.42213	0.000920583	0.00547361	Up	NA	NA	GO:0003674;GO:0003824;GO:0004672;GO:0004674;GO:0016301;GO:0016740;GO:0016772;GO:0016773;GO:0140096;	GO:0001101;GO:0006464;GO:0006468;GO:0006793;GO:0006796;GO:0006807;GO:0008150;GO:0008152;GO:0009719;GO:0009725;GO:0009737;GO:0009987;GO:0010033;GO:0016310;GO:0019538;GO:0033993;GO:0036211;GO:0042221;GO:0043170;GO:0043412;GO:0044237;GO:0044238;GO:0044260;GO:0044267;GO:0050896;GO:0071704;GO:0097305;GO:1901564;GO:1901700;	GO:0005575;GO:0005622;GO:0005623;GO:0005737;GO:0005773;GO:0005886;GO:0016020;GO:0043226;GO:0043227;GO:0043229;GO:0043231;GO:0044424;GO:0044444;GO:0044464;GO:0071944;	Cysteine-rich receptor-like protein kinase	Cysteine-rich receptor-like protein kinase 10
Cla97C02G027030	1107	22.5642	62.1335	1.46978	1.43e-05	0.000138788	Up	NA	NA	GO:0003674;GO:0005215;GO:0022857;	GO:0006810;GO:0007154;GO:0007165;GO:0008150;GO:0009719;GO:0009725;GO:0009733;GO:0009734;GO:0009755;GO:0009987;GO:0010033;GO:0023052;GO:0032870;GO:0042221;GO:0050789;GO:0050794;GO:0050896;GO:0051179;GO:0051234;GO:0051716;GO:0055085;GO:0065007;GO:0070887;GO:0071310;GO:0071365;GO:0071495;	GO:0005575;GO:0005622;GO:0005623;GO:0005737;GO:0005886;GO:0005887;GO:0005938;GO:0016020;GO:0016021;GO:0031224;GO:0031226;GO:0044424;GO:0044425;GO:0044444;GO:0044459;GO:0044464;GO:0071944;GO:0099568;	Auxin-induced protein	WAT1-related protein
Cla97C02G027100	1776	59.5011	142.661	1.26521	8.32e-10	1.6e-08	Up	NA	NA	GO:0003674;GO:0003824;GO:0009975;GO:0010333;GO:0010334;GO:0016829;GO:0016835;GO:0016838;GO:0034002;GO:0034768;GO:0050550;GO:0050551;GO:0050552;GO:0052578;GO:0080015;	GO:0001101;GO:0006629;GO:0006714;GO:0006720;GO:0006721;GO:0006950;GO:0008150;GO:0008152;GO:0008299;GO:0008610;GO:0009058;GO:0009605;GO:0009607;GO:0009611;GO:0009625;GO:0009719;GO:0009725;GO:0009753;GO:0009987;GO:0010033;GO:0016098;GO:0016099;GO:0016106;GO:0016114;GO:0042214;GO:0042221;GO:0043207;GO:0043692;GO:0043693;GO:0044237;GO:0044238;GO:0044249;GO:0044255;GO:0046246;GO:0050896;GO:0051704;GO:…	GO:0005575;GO:0005622;GO:0005623;GO:0005737;GO:0005829;GO:0009507;GO:0009532;GO:0009536;GO:0009570;GO:0043226;GO:0043227;GO:0043229;GO:0043231;GO:0044422;GO:0044424;GO:0044434;GO:0044435;GO:0044444;GO:0044446;GO:0044464;	synthase	terpene synthase 10-like
Cla97C02G027360	591	153.761	322.056	1.06413	8.96e-12	2.17e-10	Up	NA	NA	NA	NA	NA	WRKY transcription factor	WRKY domain-containing protein
Cla97C02G027780	258	913.701	2149.86	1.23368	1.06e-99	2.35e-97	Up	NA	NA	NA	NA	NA	Wound-induced protein	Wound-responsive family protein
Cla97C02G027790	453	63.5941	150.556	1.24178	3.23e-10	6.61e-09	Up	NA	NA	NA	NA	NA	NA	Unknown protein
Cla97C02G029380	513	5.79382	17.1404	1.54653	0.0102846	0.0418306	Up	NA	NA	NA	NA	NA	NA	Unknown protein
Cla97C02G030340	840	18.0929	42.1822	1.22044	0.00111822	0.00647849	Up	NA	NA	GO:0003674;GO:0003700;GO:0140110;	GO:0006355;GO:0008150;GO:0009889;GO:0010468;GO:0010556;GO:0019219;GO:0019222;GO:0031323;GO:0031326;GO:0050789;GO:0050794;GO:0051171;GO:0051252;GO:0060255;GO:0065007;GO:0080090;GO:1903506;GO:2000112;GO:2001141;GO:0008152;GO:0006139;GO:0006351;GO:0006725;GO:0006807;GO:0009058;GO:0009059;GO:0009987;GO:0010467;GO:0016070;GO:0018130;GO:0019438;GO:0032774;GO:0034641;GO:0034645;GO:0034654;GO:0043170;GO:…	NA	NAC domain-containing protein	NAC domain-containing protein
Cla97C02G032060	918	56.531	340.458	2.59212	8.21e-53	9.69e-51	Up	NA	NA	NA	NA	NA	NA	organ-specific protein S2-like isoform X2
Cla97C02G032920	879	4.47692	15.8627	1.81473	0.00502511	0.0231433	Up	NA	NA	GO:0003674;GO:0003700;GO:0140110;	GO:0000003;GO:0003006;GO:0006355;GO:0007275;GO:0008150;GO:0009790;GO:0009791;GO:0009793;GO:0009889;GO:0010154;GO:0010468;GO:0010556;GO:0019219;GO:0019222;GO:0022414;GO:0031323;GO:0031326;GO:0032501;GO:0032502;GO:0048316;GO:0048608;GO:0048731;GO:0048856;GO:0050789;GO:0050794;GO:0051171;GO:0051252;GO:0060255;GO:0061458;GO:0065007;GO:0080090;GO:1903506;GO:2000112;GO:2001141;GO:0008152;GO:0006139;GO:…	NA	Transcription factor bHLH95-like	Transcription factor bHLH95-like
Cla97C02G033340	1431	616.518	1435.28	1.22122	7.3e-63	1.05e-60	Up	NA	NA	NA	NA	NA	Belongs to the UDP-glycosyltransferase family	Glycosyltransferase
Cla97C02G034130	1071	70.0512	157.577	1.17	2.57e-10	5.3e-09	Up	NA	NA	NA	GO:0000003;GO:0003006;GO:0007275;GO:0007389;GO:0008150;GO:0009553;GO:0009653;GO:0009790;GO:0009791;GO:0009793;GO:0009798;GO:0009888;GO:0010154;GO:0010453;GO:0022414;GO:0022603;GO:0032501;GO:0032502;GO:0042659;GO:0045595;GO:0048229;GO:0048316;GO:0048608;GO:0048731;GO:0048856;GO:0050789;GO:0050793;GO:0050794;GO:0051239;GO:0051302;GO:0061458;GO:0065001;GO:0065007;GO:0090558;GO:0090708;GO:0099402;GO:…	GO:0005575;GO:0005618;GO:0005623;GO:0009505;GO:0009531;GO:0030312;GO:0044426;GO:0044462;GO:0044464;GO:0048226;GO:0071944;	LRR receptor-like serine threonine-protein kinase	leucine-rich repeat receptor protein kinase EMS1-like
Cla97C02G034340	432	17.3965	63.3966	1.86464	4.31e-08	6.56e-07	Up	NA	NA	NA	NA	NA	disease resistance protein	Fom-2 protein
Cla97C02G034350	303	7.24092	34.227	2.23137	2.76e-06	3.1e-05	Up	NA	NA	NA	NA	NA	disease resistance protein	Fom-2 protein
Cla97C02G034360	1584	7.49308	38.6472	2.34593	5.43e-07	6.98e-06	Up	NA	NA	NA	NA	NA	disease resistance protein	disease resistance protein RGA2-like
Cla97C02G034410	3228	4.13574	25.993	2.64126	8.32e-06	8.48e-05	Up	NA	NA	NA	NA	NA	disease resistance	disease resistance protein RGA2-like
Cla97C02G034890	1524	4.19058	16.1866	1.95161	0.00437269	0.0205546	Up	K13260 CYP81E; isoflavone/4'-methoxyisoflavone 2'-hydroxylase [EC:1.14.14.90 1.14.14.89]	ko00943:Isoflavonoid biosynthesis	GO:0003674;GO:0003824;GO:0004497;GO:0016491;GO:0016705;GO:0016709;	GO:0001666;GO:0002213;GO:0002376;GO:0006082;GO:0006725;GO:0006790;GO:0006807;GO:0006950;GO:0006952;GO:0006955;GO:0008150;GO:0008152;GO:0009058;GO:0009605;GO:0009607;GO:0009617;GO:0009620;GO:0009628;GO:0009682;GO:0009759;GO:0009987;GO:0016043;GO:0016143;GO:0016144;GO:0018130;GO:0019438;GO:0019748;GO:0019757;GO:0019758;GO:0019760;GO:0019761;GO:0033036;GO:0033037;GO:0033554;GO:0034641;GO:0036293;GO:…	GO:0005575;GO:0005622;GO:0005623;GO:0005737;GO:0005783;GO:0012505;GO:0016020;GO:0043226;GO:0043227;GO:0043229;GO:0043231;GO:0044424;GO:0044444;GO:0044464;	Cytochrome P450	cytochrome P450 81D1-like
Cla97C02G038410	609	53.1753	118.648	1.16503	2.9e-07	3.9e-06	Up	NA	NA	GO:0003674;GO:0003676;GO:0003677;GO:0003700;GO:0005488;GO:0043565;GO:0097159;GO:0140110;GO:1901363;	GO:0000003;GO:0003006;GO:0006355;GO:0007275;GO:0008150;GO:0009653;GO:0009791;GO:0009889;GO:0009891;GO:0009893;GO:0009908;GO:0010468;GO:0010500;GO:0010556;GO:0010557;GO:0010604;GO:0010628;GO:0019219;GO:0019222;GO:0022414;GO:0031323;GO:0031325;GO:0031326;GO:0031328;GO:0032501;GO:0032502;GO:0035670;GO:0045893;GO:0045935;GO:0048367;GO:0048437;GO:0048438;GO:0048440;GO:0048444;GO:0048445;GO:0048449;GO:…	NA	transcription factor	BHLH domain-containing protein
Cla97C02G038900	1179	32.628	92.7852	1.49773	2.92e-08	4.52e-07	Up	NA	NA	GO:0003674;GO:0003824;GO:0004620;GO:0016298;GO:0016787;GO:0016788;GO:0047372;GO:0052689;	NA	GO:0005575;GO:0005622;GO:0005623;GO:0005737;GO:0016020;GO:0044424;GO:0044464;	Lipolytic acyl hydrolase (LAH)	Patatin
Cla97C02G039210	1833	16.3607	35.1734	1.11879	0.00596466	0.0268038	Up	K07195 EXOC7, EXO70; exocyst complex component 7	NA	GO:0003674;GO:0005488;GO:0005515;GO:0005543;GO:0005546;GO:0008013;GO:0008289;GO:0035091;GO:0043167;GO:0043168;GO:1901981;GO:1902936;	GO:0001505;GO:0002237;GO:0002831;GO:0002833;GO:0006810;GO:0006836;GO:0006887;GO:0006903;GO:0006904;GO:0007154;GO:0007267;GO:0007268;GO:0007269;GO:0008150;GO:0009605;GO:0009607;GO:0009617;GO:0009620;GO:0009987;GO:0010033;GO:0016079;GO:0016080;GO:0016081;GO:0016192;GO:0017156;GO:0022406;GO:0023052;GO:0023061;GO:0031347;GO:0031349;GO:0032101;GO:0032103;GO:0032940;GO:0042221;GO:0043207;GO:0043900;GO:…	GO:0000145;GO:0005575;GO:0005622;GO:0005623;GO:0005634;GO:0005737;GO:0005829;GO:0005938;GO:0031982;GO:0032991;GO:0043226;GO:0043227;GO:0043229;GO:0043231;GO:0044424;GO:0044444;GO:0044448;GO:0044464;GO:0071944;GO:0099023;GO:0099568;	exocyst complex component	Exocyst subunit Exo70 family protein
Cla97C02G042460	429	11.5412	80.1767	2.80088	1.5e-15	5.01e-14	Up	NA	NA	NA	GO:0006950;GO:0006952;GO:0008150;GO:0050896;	NA	Pathogenesis-related protein	pathogenesis-related protein PR-4-like
Cla97C02G042470	429	15.082	35.8385	1.23645	0.00195888	0.0104609	Up	NA	NA	NA	GO:0006950;GO:0006952;GO:0008150;GO:0050896;	NA	Pathogenesis-related protein	pathogenesis-related protein PR-4-like
Cla97C02G042940	486	8.43445	23.176	1.43558	0.00954745	0.0393387	Up	NA	NA	NA	NA	NA	NA	basic-leucine zipper transcription factor A
Cla97C02G045510	237	2.82568	11.4257	2.02762	0.0120865	0.0477643	Up	NA	NA	NA	NA	NA	NA	Unknown protein
Cla97C03G051630	975	3.54922	14.8607	2.08389	0.00344894	0.0168981	Up	K02941 RP-LP0, RPLP0; large subunit ribosomal protein LP0	ko03010:Ribosome	NA	NA	NA	Ribosomal protein P0 is the functional equivalent of E.coli protein L10	60S acidic ribosomal protein P0
Cla97C03G051660	1170	25.3885	82.5453	1.69933	8.61e-09	1.43e-07	Up	K15356 GONST1_2, VRG4; GDP-mannose transporter	NA	NA	NA	NA	GDP-mannose transporter	GDP-mannose transporter GONST2
Cla97C03G051740	1830	80.8799	174.974	1.12211	5.37e-09	9.19e-08	Up	K05349 bglX; beta-glucosidase [EC:3.2.1.21]	ko00460:Cyanoamino acid metabolism|ko00500:Starch and sucrose metabolism|ko00999:Biosynthesis of various plant secondary metabolites	GO:0003674;GO:0003824;GO:0004553;GO:0008422;GO:0015926;GO:0016787;GO:0016798;	GO:0000272;GO:0005975;GO:0005976;GO:0008150;GO:0008152;GO:0009056;GO:0009057;GO:0009251;GO:0016052;GO:0043170;GO:0044042;GO:0044238;GO:0071704;GO:1901575;	GO:0000323;GO:0005575;GO:0005622;GO:0005623;GO:0005737;GO:0005764;GO:0005773;GO:0005886;GO:0016020;GO:0043226;GO:0043227;GO:0043229;GO:0043231;GO:0044424;GO:0044444;GO:0044464;GO:0071944;	Belongs to the glycosyl hydrolase 3 family	Beta-glucosidase
Cla97C03G054220	1263	106.353	334.603	1.65438	1.56e-31	1.12e-29	Up	K20617 CYP71A; cytochrome P450 family 71 subfamily A	NA	GO:0003674;GO:0003824;GO:0004497;GO:0016491;GO:0016705;GO:0016709;	GO:0008150;GO:0008152;GO:0009058;GO:0019748;GO:0044550;GO:0055114;	GO:0005575;GO:0005622;GO:0005623;GO:0005737;GO:0005783;GO:0005789;GO:0012505;GO:0016020;GO:0031090;GO:0031984;GO:0042175;GO:0043226;GO:0043227;GO:0043229;GO:0043231;GO:0044422;GO:0044424;GO:0044425;GO:0044432;GO:0044444;GO:0044446;GO:0044464;GO:0098827;	Cytochrome p450	cytochrome P450 71A1-like
Cla97C03G054230	945	51.1748	160.276	1.65164	3.66e-15	1.19e-13	Up	K20617 CYP71A; cytochrome P450 family 71 subfamily A	NA	GO:0003674;GO:0003824;GO:0004497;GO:0016491;GO:0016705;GO:0016709;	GO:0008150;GO:0008152;GO:0009058;GO:0019748;GO:0044550;GO:0055114;	GO:0005575;GO:0005622;GO:0005623;GO:0005737;GO:0005783;GO:0005789;GO:0012505;GO:0016020;GO:0031090;GO:0031984;GO:0042175;GO:0043226;GO:0043227;GO:0043229;GO:0043231;GO:0044422;GO:0044424;GO:0044425;GO:0044432;GO:0044444;GO:0044446;GO:0044464;GO:0098827;	Cytochrome p450	cytochrome P450 71A1-like
Cla97C03G056200	573	45.6217	107.495	1.22608	5.16e-07	6.66e-06	Up	NA	NA	NA	NA	NA	Late embryogenesis abundant protein	NDR1/HIN1-Like protein 3-like isoform X2
Cla97C03G056280	1875	7.63695	21.2594	1.47391	0.00583782	0.0263459	Up	NA	NA	NA	NA	NA	Cysteine-rich receptor-like protein kinase	cysteine-rich receptor-like protein kinase 28
Cla97C03G056500	1077	12.2304	52.4097	2.10334	1.98e-07	2.73e-06	Up	NA	NA	GO:0000976;GO:0000977;GO:0000978;GO:0000981;GO:0000987;GO:0001012;GO:0001067;GO:0001228;GO:0003674;GO:0003676;GO:0003677;GO:0003690;GO:0003700;GO:0005488;GO:0043565;GO:0044212;GO:0097159;GO:0140110;GO:1901363;GO:1990837;	GO:0000820;GO:0001101;GO:0006139;GO:0006351;GO:0006355;GO:0006357;GO:0006366;GO:0006521;GO:0006725;GO:0006807;GO:0006950;GO:0006970;GO:0007154;GO:0008150;GO:0008152;GO:0009058;GO:0009059;GO:0009414;GO:0009415;GO:0009605;GO:0009628;GO:0009651;GO:0009719;GO:0009725;GO:0009737;GO:0009889;GO:0009891;GO:0009893;GO:0009987;GO:0009991;GO:0010033;GO:0010035;GO:0010467;GO:0010468;GO:0010556;GO:0010557;GO:…	GO:0005575;GO:0005622;GO:0005623;GO:0005634;GO:0043226;GO:0043227;GO:0043229;GO:0043231;GO:0044424;GO:0044464;	transcription factor	transcription factor bHLH112-like
Cla97C03G056590	2421	1.00305	15.5286	3.90323	0.000138978	0.00105378	Up	NA	NA	GO:0000166;GO:0001784;GO:0003674;GO:0003824;GO:0004672;GO:0004674;GO:0004713;GO:0004715;GO:0005102;GO:0005178;GO:0005488;GO:0005515;GO:0005516;GO:0005524;GO:0008144;GO:0016301;GO:0016740;GO:0016772;GO:0016773;GO:0017076;GO:0019899;GO:0019900;GO:0019901;GO:0019902;GO:0019904;GO:0030554;GO:0031625;GO:0032553;GO:0032555;GO:0032559;GO:0035325;GO:0035639;GO:0036094;GO:0042169;GO:0043167;GO:0043168;GO:…	GO:0000165;GO:0000187;GO:0000302;GO:0001568;GO:0001775;GO:0001817;GO:0001819;GO:0001820;GO:0001932;GO:0001934;GO:0001944;GO:0001945;GO:0001959;GO:0002090;GO:0002092;GO:0002218;GO:0002220;GO:0002223;GO:0002238;GO:0002250;GO:0002252;GO:0002253;GO:0002263;GO:0002274;GO:0002275;GO:0002281;GO:0002283;GO:0002351;GO:0002366;GO:0002376;GO:0002429;GO:0002431;GO:0002433;GO:0002442;GO:0002520;GO:0002521;GO:…	GO:0001772;GO:0005575;GO:0005622;GO:0005623;GO:0005634;GO:0005737;GO:0005829;GO:0005886;GO:0005911;GO:0009898;GO:0016020;GO:0019814;GO:0019815;GO:0019897;GO:0019898;GO:0030054;GO:0030139;GO:0031234;GO:0031410;GO:0031982;GO:0032009;GO:0032991;GO:0042101;GO:0043226;GO:0043227;GO:0043229;GO:0043231;GO:0043235;GO:0044424;GO:0044425;GO:0044444;GO:0044459;GO:0044464;GO:0045335;GO:0071944;GO:0097708;GO:…	cellular response to molecule of fungal origin	Receptor-like serine/threonine-protein kinase
Cla97C03G056670	342	27.9058	87.7603	1.64416	1.42e-09	2.64e-08	Up	NA	NA	NA	NA	NA	G-type lectin S-receptor-like Serine	Receptor-like serine/threonine-protein kinase
Cla97C03G057140	1770	806.958	1930.1	1.25713	1.62e-92	3.4e-90	Up	K00422 E1.10.3.1; polyphenol oxidase [EC:1.10.3.1]	ko00350:Tyrosine metabolism|ko00950:Isoquinoline alkaloid biosynthesis	NA	NA	GO:0005575;GO:0005622;GO:0005623;GO:0005737;GO:0009507;GO:0009534;GO:0009536;GO:0009543;GO:0009579;GO:0031976;GO:0031977;GO:0031978;GO:0031984;GO:0043226;GO:0043227;GO:0043229;GO:0043231;GO:0044422;GO:0044424;GO:0044434;GO:0044435;GO:0044436;GO:0044444;GO:0044446;GO:0044464;	Polyphenol oxidase	polyphenol oxidase, chloroplastic-like
Cla97C03G057530	549	13.35	29.811	1.16524	0.00641008	0.028432	Up	NA	NA	NA	NA	NA	NA	ADP-ribosylation factor
Cla97C03G060420	2745	186.705	389.383	1.0566	3.75e-18	1.56e-16	Up	K10534 NR; nitrate reductase (NAD(P)H) [EC:1.7.1.1 1.7.1.2 1.7.1.3]	ko00910:Nitrogen metabolism	GO:0003674;GO:0003824;GO:0008940;GO:0009703;GO:0016491;GO:0016661;GO:0046857;	GO:0001505;GO:0006082;GO:0006807;GO:0006809;GO:0008150;GO:0008152;GO:0009058;GO:0009314;GO:0009416;GO:0009605;GO:0009607;GO:0009608;GO:0009610;GO:0009620;GO:0009628;GO:0009987;GO:0017144;GO:0034641;GO:0042126;GO:0042128;GO:0042133;GO:0042136;GO:0043207;GO:0043436;GO:0044237;GO:0044249;GO:0044271;GO:0044281;GO:0046209;GO:0050896;GO:0051704;GO:0051707;GO:0055114;GO:0065007;GO:0065008;GO:0071704;GO:…	GO:0005575;GO:0005622;GO:0005623;GO:0005737;GO:0005773;GO:0005829;GO:0005886;GO:0016020;GO:0043226;GO:0043227;GO:0043229;GO:0043231;GO:0044424;GO:0044444;GO:0044464;GO:0071944;	Nitrate reductase is a key enzyme involved in the first step of nitrate assimilation in plants, fungi and bacteria	Nitrate reductase
Cla97C03G060620	1401	147.467	353.44	1.2552	7.99e-21	3.79e-19	Up	K13946 AUX1, LAX; auxin influx carrier (AUX1 LAX family)	ko04075:Plant hormone signal transduction	GO:0003674;GO:0005215;GO:0005342;GO:0008509;GO:0008514;GO:0010328;GO:0015075;GO:0015171;GO:0015318;GO:0022857;GO:0046943;GO:0080161;	GO:0003333;GO:0006810;GO:0006811;GO:0006820;GO:0006865;GO:0007275;GO:0008150;GO:0009653;GO:0009719;GO:0009725;GO:0009733;GO:0009791;GO:0009914;GO:0009926;GO:0010015;GO:0010033;GO:0010101;GO:0010102;GO:0010311;GO:0010817;GO:0015711;GO:0015849;GO:0022622;GO:0032501;GO:0032502;GO:0034220;GO:0042221;GO:0046942;GO:0048364;GO:0048527;GO:0048528;GO:0048646;GO:0048731;GO:0048829;GO:0048856;GO:0050896;GO:…	GO:0005575;GO:0005623;GO:0005886;GO:0016020;GO:0044464;GO:0071944;	Auxin transporter-like protein	auxin transporter-like protein 3
Cla97C03G063770	1551	2311.69	5377.85	1.21793	2.75e-146	1.01e-143	Up	K01188 E3.2.1.21; beta-glucosidase [EC:3.2.1.21]	ko00460:Cyanoamino acid metabolism|ko00500:Starch and sucrose metabolism|ko00999:Biosynthesis of various plant secondary metabolites	GO:0003674;GO:0003824;GO:0004553;GO:0008422;GO:0015926;GO:0016787;GO:0016798;	GO:0008150;GO:0008152;GO:0071704;GO:1901135;GO:1901657;	NA	Belongs to the glycosyl hydrolase 1 family	beta-glucosidase 12-like
Cla97C03G063800	1548	15.4384	49.5428	1.68758	3.91e-06	4.27e-05	Up	K01188 E3.2.1.21; beta-glucosidase [EC:3.2.1.21]	ko00460:Cyanoamino acid metabolism|ko00500:Starch and sucrose metabolism|ko00999:Biosynthesis of various plant secondary metabolites	GO:0003674;GO:0003824;GO:0004553;GO:0008422;GO:0015926;GO:0016787;GO:0016798;	GO:0008150;GO:0008152;GO:0071704;GO:1901135;GO:1901657;	NA	Belongs to the glycosyl hydrolase 1 family	beta-glucosidase 12-like
Cla97C03G063890	1527	22.7328	53.8747	1.23679	0.000167383	0.0012363	Up	K01188 E3.2.1.21; beta-glucosidase [EC:3.2.1.21]	ko00460:Cyanoamino acid metabolism|ko00500:Starch and sucrose metabolism|ko00999:Biosynthesis of various plant secondary metabolites	GO:0003674;GO:0003824;GO:0004553;GO:0008422;GO:0015926;GO:0016787;GO:0016798;	GO:0008150;GO:0008152;GO:0071704;GO:1901135;GO:1901657;	NA	Belongs to the glycosyl hydrolase 1 family	beta-glucosidase 12-like
Cla97C03G063990	1164	31.0795	250.589	3.00206	2.23e-46	2.42e-44	Up	K00208 fabI; enoyl-[acyl-carrier protein] reductase I [EC:1.3.1.9 1.3.1.10]	ko00061:Fatty acid biosynthesis|ko00780:Biotin metabolism	GO:0003674;GO:0003824;GO:0005488;GO:0005507;GO:0016491;GO:0016627;GO:0016628;GO:0016631;GO:0043167;GO:0043169;GO:0046872;GO:0046914;	GO:0006082;GO:0006629;GO:0006631;GO:0006633;GO:0008150;GO:0008152;GO:0008610;GO:0009058;GO:0009987;GO:0016053;GO:0019752;GO:0032787;GO:0043436;GO:0044237;GO:0044238;GO:0044249;GO:0044255;GO:0044281;GO:0044283;GO:0046394;GO:0055114;GO:0071704;GO:0072330;GO:1901576;	GO:0005575;GO:0005622;GO:0005623;GO:0005737;GO:0005829;GO:0005835;GO:0009507;GO:0009526;GO:0009532;GO:0009536;GO:0009570;GO:0009579;GO:0009941;GO:0031967;GO:0031975;GO:0032991;GO:0043226;GO:0043227;GO:0043229;GO:0043231;GO:0044422;GO:0044424;GO:0044434;GO:0044435;GO:0044444;GO:0044445;GO:0044446;GO:0044464;	Enoyl- acyl-carrier-protein reductase NADH , chloroplastic-like	enoyl-[acyl-carrier-protein] reductase [NADH], chloroplastic-like
Cla97C03G064140	198	2.10213	9.82162	2.22997	0.0118057	0.0468745	Up	K11000 CALS; callose synthase [EC:2.4.1.-]	NA	NA	NA	NA	NA	1,3-beta-glucan synthase
Cla97C03G064220	1080	4.70315	19.9221	2.11722	0.000796561	0.00482285	Up	K00423 E1.10.3.3; L-ascorbate oxidase [EC:1.10.3.3]	ko00053:Ascorbate and aldarate metabolism	NA	NA	NA	Belongs to the multicopper oxidase family	L-ascorbate oxidase
Cla97C03G066260	960	83.5589	187.853	1.17111	1.86e-11	4.29e-10	Up	K00469 MIOX; inositol oxygenase [EC:1.13.99.1]	ko00053:Ascorbate and aldarate metabolism|ko00562:Inositol phosphate metabolism	GO:0003674;GO:0003824;GO:0016491;GO:0016701;GO:0050113;	GO:0008150;GO:0008152;GO:0055114;	NA	Inositol oxygenase	Inositol oxygenase
Cla97C03G067400	1284	143.709	368.242	1.36177	1.09e-22	5.69e-21	Up	NA	NA	NA	NA	NA	ZINC FINGER protein	protein indeterminate-domain 12-like
Cla97C03G067950	3231	121.274	245.479	1.01181	4.71e-11	1.05e-09	Up	K10406 KIFC2_3; kinesin family member C2/C3	NA	GO:0003674;GO:0003774;GO:0003777;GO:0003779;GO:0003824;GO:0005488;GO:0005515;GO:0008017;GO:0008092;GO:0008569;GO:0015631;GO:0016462;GO:0016787;GO:0016817;GO:0016818;GO:0016887;GO:0017111;GO:0042623;GO:0043621;GO:1990939;	GO:0006810;GO:0006928;GO:0007017;GO:0007018;GO:0007097;GO:0008150;GO:0009987;GO:0031534;GO:0046907;GO:0051012;GO:0051179;GO:0051234;GO:0051640;GO:0051641;GO:0051647;GO:0051649;GO:0051656;	GO:0005575;GO:0005622;GO:0005623;GO:0005856;GO:0005871;GO:0005875;GO:0015629;GO:0015630;GO:0032991;GO:0043226;GO:0043228;GO:0043229;GO:0043232;GO:0044422;GO:0044424;GO:0044430;GO:0044446;GO:0044464;	Belongs to the TRAFAC class myosin-kinesin ATPase superfamily. Kinesin family	kinesin-like protein KIN-14G
Cla97C04G069000	1086	6.25153	20.905	1.73946	0.00217439	0.0114243	Up	K14498 SNRK2; serine/threonine-protein kinase SRK2 [EC:2.7.11.1]	ko04016:MAPK signaling pathway - plant|ko04075:Plant hormone signal transduction	GO:0003674;GO:0003676;GO:0003723;GO:0003729;GO:0003824;GO:0004672;GO:0004674;GO:0005488;GO:0016301;GO:0016740;GO:0016772;GO:0016773;GO:0097159;GO:0140096;GO:1901363;	GO:0006464;GO:0006468;GO:0006793;GO:0006796;GO:0006807;GO:0006950;GO:0006970;GO:0007154;GO:0007165;GO:0008150;GO:0008152;GO:0009628;GO:0009651;GO:0009987;GO:0016310;GO:0019538;GO:0023052;GO:0035556;GO:0036211;GO:0043170;GO:0043412;GO:0044237;GO:0044238;GO:0044260;GO:0044267;GO:0050789;GO:0050794;GO:0050896;GO:0051716;GO:0065007;GO:0071704;GO:1901564;	GO:0005575;GO:0005622;GO:0005623;GO:0005634;GO:0005737;GO:0043226;GO:0043227;GO:0043229;GO:0043231;GO:0044424;GO:0044464;	Belongs to the protein kinase superfamily	serine/threonine-protein kinase SRK2H-like
Cla97C04G070470	243	114.832	244.697	1.09432	2.16e-11	4.97e-10	Up	NA	NA	NA	NA	NA	NA	Unknown protein
Cla97C04G072240	1713	59.1442	205.666	1.79671	1.56e-19	6.93e-18	Up	NA	NA	GO:0003674;GO:0003824;GO:0004672;GO:0004674;GO:0004683;GO:0005488;GO:0005515;GO:0005516;GO:0009931;GO:0010857;GO:0016301;GO:0016740;GO:0016772;GO:0016773;GO:0140096;	GO:0001101;GO:0006464;GO:0006468;GO:0006793;GO:0006796;GO:0006807;GO:0006950;GO:0007154;GO:0007165;GO:0008150;GO:0008152;GO:0009266;GO:0009408;GO:0009628;GO:0009719;GO:0009725;GO:0009737;GO:0009738;GO:0009755;GO:0009987;GO:0010033;GO:0010286;GO:0016310;GO:0018105;GO:0018193;GO:0018209;GO:0019538;GO:0023052;GO:0032870;GO:0033993;GO:0035556;GO:0036211;GO:0042221;GO:0043170;GO:0043412;GO:0044237;GO:…	GO:0005575;GO:0005622;GO:0005623;GO:0005634;GO:0005737;GO:0005886;GO:0016020;GO:0043226;GO:0043227;GO:0043229;GO:0043231;GO:0044424;GO:0044464;GO:0071944;	CDPK-related kinase	CDPK-related kinase
Cla97C04G073490	564	11.8412	32.6426	1.46297	0.000727655	0.0044578	Up	K01568 PDC, pdc; pyruvate decarboxylase [EC:4.1.1.1]	ko00010:Glycolysis / Gluconeogenesis	NA	NA	NA	Belongs to the TPP enzyme family	Pyruvate decarboxylase
Cla97C04G073510	1899	38.4879	104.885	1.4569	3.61e-09	6.32e-08	Up	K01568 PDC, pdc; pyruvate decarboxylase [EC:4.1.1.1]	ko00010:Glycolysis / Gluconeogenesis	NA	NA	NA	Belongs to the TPP enzyme family	Pyruvate decarboxylase
Cla97C04G074500	816	10.5641	30.3624	1.50827	0.00178768	0.00969276	Up	NA	NA	NA	NA	NA	Cysteine Histidine-rich C1 domain family protein	Cysteine/Histidine-rich C1 domain family protein
Cla97C04G078030	297	753.306	2130.43	1.50003	6.07e-12	1.49e-10	Up	NA	NA	NA	NA	NA	NA	vacuolar protein sorting-associated protein 13-like protein
Cla97C05G080270	2349	70.512	143.148	1.02806	3.49e-06	3.85e-05	Up	NA	NA	GO:0003674;GO:0003676;GO:0003723;GO:0003824;GO:0004518;GO:0004519;GO:0005488;GO:0016787;GO:0016788;GO:0097159;GO:1901363;	GO:0006139;GO:0006725;GO:0006807;GO:0008150;GO:0008152;GO:0009451;GO:0009987;GO:0016070;GO:0034641;GO:0043170;GO:0043412;GO:0044237;GO:0044238;GO:0046483;GO:0071704;GO:0090304;GO:0090305;GO:1901360;	GO:0005575;GO:0005622;GO:0005623;GO:0043226;GO:0043227;GO:0043229;GO:0043231;GO:0044424;GO:0044464;	Pentatricopeptide repeat-containing protein	Pentatricopeptide repeat-containing protein
Cla97C05G081790	1623	8.78247	33.972	1.92546	5.35e-05	0.000455892	Up	NA	NA	NA	GO:0000003;GO:0003006;GO:0006325;GO:0006464;GO:0006476;GO:0006807;GO:0006996;GO:0007275;GO:0007276;GO:0008150;GO:0008152;GO:0009555;GO:0009893;GO:0009987;GO:0010468;GO:0010604;GO:0010628;GO:0016043;GO:0016569;GO:0016570;GO:0016575;GO:0019222;GO:0019538;GO:0019953;GO:0022412;GO:0022414;GO:0030154;GO:0032501;GO:0032502;GO:0032504;GO:0035601;GO:0036211;GO:0043170;GO:0043412;GO:0044237;GO:0044238;GO:…	GO:0000118;GO:0005575;GO:0005622;GO:0005623;GO:0005634;GO:0005654;GO:0031974;GO:0031981;GO:0032991;GO:0043226;GO:0043227;GO:0043229;GO:0043231;GO:0043233;GO:0044422;GO:0044424;GO:0044428;GO:0044446;GO:0044451;GO:0044464;GO:0048555;GO:0048556;GO:0070013;GO:1902494;	AT-rich interactive domain-containing protein	AT-rich interactive domain-containing protein 2-like isoform X1
Cla97C05G082470	978	40.3282	90.9228	1.17182	2.4e-06	2.73e-05	Up	K15919 HPR2_3; glyoxylate/hydroxypyruvate reductase [EC:1.1.1.79 1.1.1.81]	ko00260:Glycine, serine and threonine metabolism|ko00630:Glyoxylate and dicarboxylate metabolism	NA	NA	NA	Belongs to the D-isomer specific 2-hydroxyacid dehydrogenase family	Glyoxylate/hydroxypyruvate reductase HPR3-like
Cla97C05G087270	525	10.5792	32.5956	1.63427	0.000246518	0.0017442	Up	NA	NA	GO:0003674;GO:0005488;GO:0048037;GO:0051536;GO:0051540;	NA	NA	Belongs to the Casparian strip membrane proteins (CASP) family	CASP-like protein
Cla97C05G087600	519	3.14636	19.3441	2.62391	0.000134942	0.00102868	Up	K05770 TSPO, BZRP; translocator protein	NA	GO:0003674;GO:0005488;GO:0020037;GO:0046906;GO:0048037;GO:0097159;GO:1901363;	GO:0001101;GO:0006725;GO:0006778;GO:0006807;GO:0006950;GO:0006970;GO:0008150;GO:0008152;GO:0009628;GO:0009651;GO:0009719;GO:0009725;GO:0009737;GO:0009987;GO:0010033;GO:0033013;GO:0033993;GO:0042221;GO:0044237;GO:0046483;GO:0050896;GO:0051186;GO:0071704;GO:0097305;GO:1901360;GO:1901564;GO:1901700;	GO:0000139;GO:0005575;GO:0005622;GO:0005623;GO:0005737;GO:0005783;GO:0005789;GO:0005794;GO:0005795;GO:0009507;GO:0009526;GO:0009536;GO:0009941;GO:0012505;GO:0016020;GO:0031090;GO:0031967;GO:0031969;GO:0031975;GO:0031984;GO:0042170;GO:0042175;GO:0043226;GO:0043227;GO:0043229;GO:0043231;GO:0044422;GO:0044424;GO:0044425;GO:0044431;GO:0044432;GO:0044434;GO:0044435;GO:0044444;GO:0044446;GO:0044464;GO:…	TspO/MBR family	translocator protein homolog
Cla97C05G088270	1047	31.4343	63.4213	1.00663	0.000560359	0.00355593	Up	NA	NA	NA	NA	NA	WRKY transcription factor	WRKY domain-containing protein
Cla97C05G089080	213	48.068	100.689	1.06729	1.31e-05	0.000128632	Up	NA	NA	NA	NA	NA	NA	Unknown protein
Cla97C05G089170	738	19.7112	68.1701	1.79866	3.37e-08	5.18e-07	Up	NA	NA	NA	NA	NA	21 kDa protein-like	Plant invertase/pectin methylesterase inhibitor superfamily protein
Cla97C05G089190	588	2.98865	18.9814	2.62084	0.000250177	0.00176823	Up	NA	NA	GO:0003674;GO:0004857;GO:0030234;GO:0046910;GO:0098772;	GO:0008150;GO:0043086;GO:0044092;GO:0050789;GO:0050790;GO:0050793;GO:0051239;GO:0065007;GO:0065009;GO:2000026;GO:2000280;GO:0032502;GO:0032501;GO:0007275;GO:0048856;GO:0022622;GO:0048364;GO:0048731;GO:0099402;	GO:0005575;GO:0005618;GO:0005623;GO:0009505;GO:0030312;GO:0044464;GO:0071944;	21 kDa protein-like	Plant invertase/pectin methylesterase inhibitor superfamily protein
Cla97C05G090380	2112	135.203	661.311	2.28193	8.64e-83	1.63e-80	Up	K00521 E1.16.1.7; ferric-chelate reductase [EC:1.16.1.7]	NA	GO:0000293;GO:0003674;GO:0003824;GO:0016491;GO:0016722;GO:0016723;	GO:0008150;GO:0008152;GO:0055114;	NA	Ferric reduction oxidase 4-like	ferric reduction oxidase 4-like
Cla97C05G090390	261	20.8362	76.1005	1.86613	4.75e-10	9.42e-09	Up	K01881 PARS, proS; prolyl-tRNA synthetase [EC:6.1.1.15]	ko00970:Aminoacyl-tRNA biosynthesis	NA	NA	NA	NA	Prolyl-tRNA synthetase
Cla97C05G091500	267	1235.97	2849.96	1.20531	2.87e-109	6.89e-107	Up	K25829 ELOF1, ELF1; transcription elongation factor 1	NA	GO:0000993;GO:0001098;GO:0001099;GO:0003674;GO:0005488;GO:0005515;GO:0019899;GO:0043175;GO:0044877;GO:0070063;	GO:0006139;GO:0006325;GO:0006338;GO:0006351;GO:0006354;GO:0006355;GO:0006366;GO:0006368;GO:0006725;GO:0006807;GO:0006996;GO:0008150;GO:0008152;GO:0009058;GO:0009059;GO:0009889;GO:0009891;GO:0009893;GO:0009987;GO:0010467;GO:0010468;GO:0010556;GO:0010557;GO:0010604;GO:0010628;GO:0016043;GO:0016070;GO:0018130;GO:0019219;GO:0019222;GO:0019438;GO:0031323;GO:0031325;GO:0031326;GO:0031328;GO:0032774;GO:…	GO:0005575;GO:0005622;GO:0005623;GO:0005634;GO:0005654;GO:0008023;GO:0031974;GO:0031981;GO:0032991;GO:0043226;GO:0043227;GO:0043229;GO:0043231;GO:0043233;GO:0044422;GO:0044424;GO:0044428;GO:0044446;GO:0044451;GO:0044464;GO:0070013;	Transcription elongation factor implicated in the maintenance of proper chromatin structure in actively transcribed regions	Transcription elongation factor 1 homolog
Cla97C05G092030	1068	2.1158	13.9064	2.72943	0.00130665	0.00738688	Up	NA	NA	NA	NA	NA	11S globulin seed storage protein	glutelin type-A 2-like
Cla97C05G093320	462	37.9534	80.1729	1.0789	6.38e-05	0.000531686	Up	NA	NA	NA	NA	NA	MLP-like protein	Bet_v_1 domain-containing protein
Cla97C05G094220	465	251.248	530.122	1.0784	1.29e-23	7.12e-22	Up	NA	NA	NA	NA	NA	NA	Unknown protein
Cla97C05G094510	885	15.3563	62.5793	2.028	7.98e-09	1.33e-07	Up	NA	NA	NA	NA	NA	Methyltransferase domain	Methyltransf_11 domain-containing protein
Cla97C05G095110	336	89.54	185.291	1.04436	1.76e-09	3.24e-08	Up	NA	NA	NA	NA	NA	NA	Unknown protein
Cla97C05G095200	357	6.51737	19.3904	1.55962	0.00660361	0.0291495	Up	NA	NA	NA	NA	NA	NA	Unknown protein
Cla97C05G095440	2427	22.9056	57.0223	1.3251	3.48e-05	0.000308512	Up	NA	NA	NA	GO:0006810;GO:0006811;GO:0006812;GO:0006885;GO:0008150;GO:0015672;GO:0042592;GO:0048878;GO:0050801;GO:0051179;GO:0051234;GO:0055067;GO:0055080;GO:0065007;GO:0065008;GO:0098771;	GO:0005575;GO:0005623;GO:0012505;GO:0044464;	cation H( ) antiporter 15-like	cation/H(+) antiporter 15-like
Cla97C05G095870	546	17.4568	45.6289	1.37278	0.000144676	0.0010885	Up	NA	NA	NA	GO:0008150;GO:0009825;GO:0009987;GO:0016049;GO:0040007;	NA	NA	Lysine-specific demethylase
Cla97C05G100850	1578	151.59	583.744	1.9477	8.16e-60	1.1e-57	Up	NA	NA	GO:0003674;GO:0003824;GO:0004497;GO:0016491;GO:0016705;GO:0016709;	GO:0008150;GO:0008152;GO:0009058;GO:0009987;GO:0010035;GO:0010038;GO:0010039;GO:0019748;GO:0042221;GO:0044550;GO:0050896;GO:0051716;GO:0055114;GO:0070887;GO:0071241;GO:0071248;GO:0071281;	GO:0005575;GO:0016020;	Cytochrome p450	Cytochrome P450
Cla97C05G100860	546	5.96363	22.7803	1.89563	0.00192856	0.0103399	Up	NA	NA	GO:0003674;GO:0003824;GO:0004497;GO:0016491;GO:0016705;GO:0016709;	GO:0008150;GO:0008152;GO:0009058;GO:0009987;GO:0010035;GO:0010038;GO:0010039;GO:0019748;GO:0042221;GO:0044550;GO:0050896;GO:0051716;GO:0055114;GO:0070887;GO:0071241;GO:0071248;GO:0071281;	GO:0005575;GO:0016020;	Cytochrome p450	Cytochrome P450
Cla97C05G102130	279	16.2359	32.5959	1.0004	0.0125413	0.0492383	Up	NA	NA	NA	NA	NA	NA	Unknown protein
Cla97C05G105780	207	12.8032	29.1711	1.18343	0.00876547	0.0366638	Up	NA	NA	NA	NA	NA	NA	Unknown protein
Cla97C05G108820	612	34.3369	97.219	1.50632	7.93e-09	1.32e-07	Up	NA	NA	NA	NA	NA	NA	DUF4378 domain-containing protein
Cla97C06G110120	567	6.43518	23.1757	1.82562	0.00136631	0.00768683	Up	NA	NA	NA	NA	GO:0005575;GO:0005576;	invertase	PMEI domain-containing protein
Cla97C06G110850	1605	157.118	330.269	1.07319	2.25e-16	8.13e-15	Up	K25487 CYP81Q58; 19-hydroxycucurbitadienol 25-hydroxylase [EC:1.14.14.-]	ko00996:Biosynthesis of various alkaloids	NA	NA	NA	iron ion binding	Cytochrome P450
Cla97C06G111020	156	7.3231	20.9225	1.51529	0.00606378	0.0271706	Up	NA	NA	NA	NA	NA	NA	Unknown protein
Cla97C06G111730	240	65.058	149.64	1.2085	1.91e-09	3.5e-08	Up	NA	NA	NA	NA	NA	pollen allergen Ole e 6-like	major pollen allergen Ole e 6-like
Cla97C06G112640	1362	30.8387	101.019	1.7318	3.83e-09	6.69e-08	Up	NA	NA	NA	NA	NA	Belongs to the UDP-glycosyltransferase family	Glycosyltransferase
Cla97C06G117180	1665	206.55	528.143	1.35553	1.37e-31	9.88e-30	Up	K01177 E3.2.1.2; beta-amylase [EC:3.2.1.2]	ko00500:Starch and sucrose metabolism	GO:0003674;GO:0003824;GO:0004553;GO:0016160;GO:0016161;GO:0016787;GO:0016798;	GO:0000272;GO:0001101;GO:0005975;GO:0005976;GO:0005982;GO:0005983;GO:0006073;GO:0006950;GO:0008150;GO:0008152;GO:0009056;GO:0009057;GO:0009251;GO:0009414;GO:0009415;GO:0009628;GO:0009987;GO:0010035;GO:0016052;GO:0042221;GO:0043170;GO:0044042;GO:0044237;GO:0044238;GO:0044247;GO:0044248;GO:0044260;GO:0044262;GO:0044264;GO:0044275;GO:0050896;GO:0071704;GO:1901575;GO:1901700;	GO:0005575;GO:0005622;GO:0005623;GO:0005634;GO:0005737;GO:0005829;GO:0043226;GO:0043227;GO:0043229;GO:0043231;GO:0044424;GO:0044444;GO:0044464;	Beta-amylase	Beta-amylase
Cla97C06G121580	369	9.0292	30.1677	1.73709	0.000232411	0.00165893	Up	NA	NA	NA	NA	NA	NA	Unknown protein
Cla97C06G124090	1287	44.9254	117.487	1.37609	5.85e-09	9.98e-08	Up	NA	NA	NA	NA	NA	Encoded by	Stress up-regulated Nod 19 protein
Cla97C06G124350	744	131.612	321.684	1.28899	4.34e-17	1.67e-15	Up	NA	NA	NA	NA	NA	LOB domain-containing protein	LOB domain-containing protein
Cla97C06G124380	384	199.901	819.538	2.03609	5.45e-10	1.07e-08	Up	NA	NA	NA	NA	NA	NA	Unknown protein
Cla97C07G128350	435	12.8991	60.5002	2.2308	5.93e-10	1.16e-08	Up	NA	NA	NA	NA	NA	NA	Unknown protein
Cla97C07G130240	228	23.5385	199.389	3.07587	1.01e-38	9.24e-37	Up	NA	NA	NA	NA	NA	NA	Unknown protein
Cla97C07G130250	1134	55.0978	250.95	2.18816	1.65e-34	1.31e-32	Up	NA	NA	NA	NA	NA	Zinc finger, C3HC4 type (RING finger)	RING-type domain-containing protein
Cla97C07G131030	948	23.9291	53.8538	1.17809	0.000261711	0.00183817	Up	K00430 E1.11.1.7; peroxidase [EC:1.11.1.7]	ko00940:Phenylpropanoid biosynthesis	NA	GO:0006725;GO:0008150;GO:0008152;GO:0009058;GO:0009698;GO:0009699;GO:0009808;GO:0009809;GO:0009888;GO:0009889;GO:0009891;GO:0009893;GO:0009987;GO:0010087;GO:0010089;GO:0019222;GO:0019438;GO:0019748;GO:0031323;GO:0031325;GO:0031326;GO:0031328;GO:0032502;GO:0043455;GO:0044237;GO:0044249;GO:0044550;GO:0048518;GO:0048522;GO:0048856;GO:0050789;GO:0050794;GO:0065007;GO:0071704;GO:1900376;GO:1900378;GO:…	GO:0005575;GO:0005576;GO:0005618;GO:0005622;GO:0005623;GO:0005737;GO:0005794;GO:0005829;GO:0012505;GO:0030312;GO:0043226;GO:0043227;GO:0043229;GO:0043231;GO:0044424;GO:0044444;GO:0044464;GO:0048046;GO:0071944;	Belongs to the peroxidase family. Classical plant (class III) peroxidase subfamily	Peroxidase
Cla97C07G131160	618	65.3908	337.019	2.36962	1.24e-47	1.37e-45	Up	NA	NA	NA	NA	NA	Transcription factor	BHLH domain-containing protein
Cla97C07G132660	1794	3141.92	7376.73	1.23101	2.74e-246	1.91e-243	Up	K05857 PLCD; phosphatidylinositol phospholipase C, delta [EC:3.1.4.11]	ko00562:Inositol phosphate metabolism|ko04070:Phosphatidylinositol signaling system	GO:0003674;GO:0003824;GO:0004620;GO:0004629;GO:0008081;GO:0016298;GO:0016787;GO:0016788;GO:0042578;	GO:0000003;GO:0003006;GO:0006950;GO:0006952;GO:0007049;GO:0007275;GO:0008150;GO:0009553;GO:0009555;GO:0009556;GO:0009605;GO:0009607;GO:0009617;GO:0009791;GO:0009889;GO:0009891;GO:0009893;GO:0009908;GO:0009987;GO:0010600;GO:0010601;GO:0010817;GO:0019222;GO:0019953;GO:0022402;GO:0022414;GO:0031323;GO:0031325;GO:0031326;GO:0031328;GO:0032350;GO:0032352;GO:0032501;GO:0032502;GO:0034293;GO:0042742;GO:…	GO:0005575;GO:0005623;GO:0005886;GO:0016020;GO:0044464;GO:0071944;	Phosphoinositide phospholipase C	Phosphoinositide phospholipase C
Cla97C07G133570	978	3.76704	17.1791	2.17279	0.00178058	0.00966464	Up	NA	NA	GO:0003674;GO:0003700;GO:0140110;	GO:0006355;GO:0008150;GO:0009889;GO:0010468;GO:0010556;GO:0019219;GO:0019222;GO:0031323;GO:0031326;GO:0050789;GO:0050794;GO:0051171;GO:0051252;GO:0060255;GO:0065007;GO:0080090;GO:1903506;GO:2000112;GO:2001141;GO:0008152;GO:0006139;GO:0006351;GO:0006725;GO:0006807;GO:0009058;GO:0009059;GO:0009987;GO:0010467;GO:0016070;GO:0018130;GO:0019438;GO:0032774;GO:0034641;GO:0034645;GO:0034654;GO:0043170;GO:…	NA	WRKY transcription factor	WRKY transcription factor 55
Cla97C07G133580	858	158.95	373.604	1.23045	5.53e-23	2.95e-21	Up	NA	NA	GO:0003674;GO:0003700;GO:0140110;	GO:0001101;GO:0002218;GO:0002252;GO:0002253;GO:0002376;GO:0002682;GO:0002684;GO:0006355;GO:0006950;GO:0006952;GO:0006955;GO:0007154;GO:0007165;GO:0008150;GO:0009605;GO:0009607;GO:0009617;GO:0009620;GO:0009627;GO:0009682;GO:0009719;GO:0009725;GO:0009751;GO:0009753;GO:0009755;GO:0009814;GO:0009862;GO:0009863;GO:0009864;GO:0009867;GO:0009889;GO:0009890;GO:0009892;GO:0009987;GO:0010033;GO:0010200;GO:…	NA	WRKY transcription factor	WRKY70
Cla97C07G133680	1494	34.2686	83.6508	1.29059	1.92e-06	2.24e-05	Up	K11699 RDR, RDRP; RNA-dependent RNA polymerase [EC:2.7.7.48]	NA	NA	GO:0001101;GO:0006139;GO:0006396;GO:0006725;GO:0006807;GO:0008150;GO:0008152;GO:0009058;GO:0009605;GO:0009607;GO:0009615;GO:0009719;GO:0009725;GO:0009751;GO:0009892;GO:0009987;GO:0010025;GO:0010033;GO:0010166;GO:0010467;GO:0010468;GO:0010605;GO:0010608;GO:0010629;GO:0014070;GO:0016070;GO:0016246;GO:0016441;GO:0016458;GO:0019222;GO:0030422;GO:0031047;GO:0031050;GO:0034641;GO:0035194;GO:0040029;GO:…	NA	Probably involved in the RNA silencing pathway and required for the generation of small interfering RNAs (siRNAs)	RNA-dependent RNA polymerase
Cla97C07G133710	1131	28.5827	66.5895	1.22052	4.22e-05	0.000366659	Up	NA	NA	NA	NA	NA	S-adenosylmethionine-dependent methyltransferase	S-adenosyl-L-methionine-dependent methyltransferases superfamily protein
Cla97C07G133850	1881	5.14562	19.3453	1.89676	0.00151305	0.00838159	Up	K12116 FKF1; flavin-binding kelch repeat F-box protein 1	ko04712:Circadian rhythm - plant	NA	GO:0006355;GO:0007623;GO:0008150;GO:0009314;GO:0009416;GO:0009628;GO:0009637;GO:0009889;GO:0009909;GO:0009911;GO:0010468;GO:0010556;GO:0019219;GO:0019222;GO:0031323;GO:0031326;GO:0048511;GO:0048518;GO:0048580;GO:0048582;GO:0048831;GO:0050789;GO:0050793;GO:0050794;GO:0050896;GO:0051094;GO:0051171;GO:0051239;GO:0051240;GO:0051252;GO:0060255;GO:0065007;GO:0080090;GO:1903506;GO:2000026;GO:2000112;GO:…	GO:0005575;GO:0005622;GO:0005623;GO:0005634;GO:0005737;GO:0043226;GO:0043227;GO:0043229;GO:0043231;GO:0044424;GO:0044464;	Adagio protein	adagio protein 3-like
Cla97C07G134280	3393	581.731	1232.97	1.08254	1.5e-50	1.71e-48	Up	K11699 RDR, RDRP; RNA-dependent RNA polymerase [EC:2.7.7.48]	NA	NA	GO:0001101;GO:0006139;GO:0006396;GO:0006725;GO:0006807;GO:0008150;GO:0008152;GO:0009058;GO:0009605;GO:0009607;GO:0009615;GO:0009719;GO:0009725;GO:0009751;GO:0009892;GO:0009987;GO:0010025;GO:0010033;GO:0010166;GO:0010467;GO:0010468;GO:0010605;GO:0010608;GO:0010629;GO:0014070;GO:0016070;GO:0016246;GO:0016441;GO:0016458;GO:0019222;GO:0030422;GO:0031047;GO:0031050;GO:0034641;GO:0035194;GO:0040029;GO:…	NA	Probably involved in the RNA silencing pathway and required for the generation of small interfering RNAs (siRNAs)	RNA-dependent RNA polymerase
Cla97C07G136940	765	3.39309	16.1981	2.32177	0.00237878	0.0123503	Up	NA	NA	NA	NA	NA	Pathogen-related	pathogen-related protein-like
Cla97C07G139430	399	7.38495	23.412	1.67295	0.00258468	0.0132456	Up	NA	NA	NA	NA	NA	EPIDERMAL PATTERNING FACTOR-like protein	Epidermal patterning factor-like protein
Cla97C07G140040	621	343.901	748.977	1.12326	1.03e-37	9.19e-36	Up	NA	NA	NA	NA	NA	Ribonuclease H protein	Avr9/Cf-9 rapidly elicited protein
Cla97C07G140090	612	105.438	264.449	1.32634	1.29e-17	5.11e-16	Up	K09286 EREBP; EREBP-like factor	NA	GO:0003674;GO:0003700;GO:0140110;	GO:0006355;GO:0008150;GO:0009889;GO:0010468;GO:0010556;GO:0019219;GO:0019222;GO:0031323;GO:0031326;GO:0050789;GO:0050794;GO:0051171;GO:0051252;GO:0060255;GO:0065007;GO:0080090;GO:1903506;GO:2000112;GO:2001141;GO:0008152;GO:0006139;GO:0006351;GO:0006725;GO:0006807;GO:0009058;GO:0009059;GO:0009987;GO:0010467;GO:0016070;GO:0018130;GO:0019438;GO:0032774;GO:0034641;GO:0034645;GO:0034654;GO:0043170;GO:…	NA	ethylene-responsive transcription factor	ethylene-responsive transcription factor TINY
Cla97C07G140380	1458	24.476	88.118	1.86342	9.48e-11	2.03e-09	Up	NA	NA	NA	NA	NA	F-Box protein	F-box domain-containing protein
Cla97C07G140650	2673	22.5697	49.7074	1.1373	0.000647736	0.00404304	Up	K08776 NPEPPS; puromycin-sensitive aminopeptidase [EC:3.4.11.14]	NA	GO:0003674;GO:0003824;GO:0004177;GO:0005488;GO:0008233;GO:0008235;GO:0008237;GO:0008238;GO:0008270;GO:0016787;GO:0033218;GO:0042277;GO:0043167;GO:0043169;GO:0046872;GO:0046914;GO:0070006;GO:0070011;GO:0140096;	GO:0001666;GO:0006508;GO:0006518;GO:0006807;GO:0006950;GO:0008150;GO:0008152;GO:0009056;GO:0009628;GO:0009987;GO:0019538;GO:0033554;GO:0034641;GO:0036293;GO:0036294;GO:0042221;GO:0043170;GO:0043171;GO:0043603;GO:0044237;GO:0044238;GO:0044248;GO:0050896;GO:0051716;GO:0070482;GO:0070887;GO:0071453;GO:0071456;GO:0071704;GO:1901564;GO:1901565;GO:1901575;	GO:0005575;GO:0005622;GO:0005623;GO:0005737;GO:0005829;GO:0044424;GO:0044444;GO:0044464;	Aminopeptidase	Aminopeptidase
Cla97C07G140940	354	0.723548	10.1872	3.85925	0.00195333	0.0104367	Up	K20623 CYP92A6; typhasterol/6-deoxotyphasterol 2alpha-hydroxylase	ko00905:Brassinosteroid biosynthesis	NA	NA	GO:0005575;GO:0005622;GO:0005623;GO:0005737;GO:0005783;GO:0005789;GO:0012505;GO:0016020;GO:0031090;GO:0031984;GO:0042175;GO:0043226;GO:0043227;GO:0043229;GO:0043231;GO:0044422;GO:0044424;GO:0044425;GO:0044432;GO:0044444;GO:0044446;GO:0044464;GO:0098827;	Cytochrome p450	Cytochrome P450 71A1-like
Cla97C07G140960	1536	71.3216	162.009	1.18636	3.87e-10	7.79e-09	Up	K20623 CYP92A6; typhasterol/6-deoxotyphasterol 2alpha-hydroxylase	ko00905:Brassinosteroid biosynthesis	NA	NA	GO:0005575;GO:0005622;GO:0005623;GO:0005737;GO:0005783;GO:0005789;GO:0012505;GO:0016020;GO:0031090;GO:0031984;GO:0042175;GO:0043226;GO:0043227;GO:0043229;GO:0043231;GO:0044422;GO:0044424;GO:0044425;GO:0044432;GO:0044444;GO:0044446;GO:0044464;GO:0098827;	Cytochrome p450	cytochrome P450 71A1-like
Cla97C07G141230	399	14.9122	37.6525	1.33375	0.000729875	0.00447004	Up	NA	NA	NA	NA	NA	NA	Unknown protein
Cla97C07G142980	216	0.668701	9.44116	3.7741	0.00370764	0.0179866	Up	NA	NA	NA	NA	NA	NADH-ubiquinone reductase complex 1 MLRQ subunit	B12D
Cla97C07G143550	1392	8.53871	42.0682	2.32079	3.06e-07	4.11e-06	Up	NA	NA	NA	NA	NA	Salutaridinol 7-O-acetyltransferase-like	salutaridinol 7-O-acetyltransferase-like
Cla97C07G144250	1104	39.162	135.386	1.79288	7.05e-16	2.41e-14	Up	K22684 MCA1; metacaspase-1 [EC:3.4.22.-]	NA	NA	GO:0008150;GO:0010941;GO:0043067;GO:0043069;GO:0048519;GO:0048523;GO:0050789;GO:0050794;GO:0060548;GO:0065007;GO:0008219;GO:0009987;GO:0012501;	NA	Metacaspase-1-like	metacaspase-1-like
Cla97C07G144530	1038	446.183	1172.85	1.39116	1.98e-67	3.08e-65	Up	K24028 DMR6, DLO; salicylic acid 3-hydroxylase [EC:1.14.11.-]	NA	GO:0003674;GO:0003824;GO:0004497;GO:0016491;GO:0016705;GO:0016706;GO:0016709;GO:0033759;GO:0034785;GO:0051213;	GO:0001101;GO:0002229;GO:0002239;GO:0006082;GO:0006725;GO:0006950;GO:0006952;GO:0007275;GO:0007568;GO:0008150;GO:0008152;GO:0009056;GO:0009058;GO:0009605;GO:0009607;GO:0009617;GO:0009620;GO:0009696;GO:0009719;GO:0009725;GO:0009751;GO:0009812;GO:0009813;GO:0009987;GO:0010033;GO:0010150;GO:0010817;GO:0014070;GO:0016054;GO:0016999;GO:0017001;GO:0017144;GO:0018958;GO:0019336;GO:0019439;GO:0019752;GO:…	NA	Belongs to the iron ascorbate-dependent oxidoreductase family	2-oxoglutarate (2OG) and Fe(II)-dependent oxygenase superfamily protein
Cla97C08G146010	432	193.405	409.187	1.08154	3.86e-20	1.77e-18	Up	NA	NA	NA	NA	NA	NA	keratin, type II cytoskeletal 3 isoform X1
Cla97C08G146160	354	22.5697	106.212	2.23156	5.47e-16	1.91e-14	Up	NA	NA	GO:0003674;GO:0003676;GO:0003677;GO:0005488;GO:0005515;GO:0008270;GO:0042802;GO:0042803;GO:0043167;GO:0043169;GO:0043565;GO:0046872;GO:0046914;GO:0046983;GO:0097159;GO:1901363;	GO:0001101;GO:0006355;GO:0006950;GO:0006979;GO:0008150;GO:0009414;GO:0009415;GO:0009628;GO:0009889;GO:0010035;GO:0010038;GO:0010044;GO:0010468;GO:0010556;GO:0019219;GO:0019222;GO:0031323;GO:0031326;GO:0042221;GO:0050789;GO:0050794;GO:0050896;GO:0051171;GO:0051252;GO:0060255;GO:0065007;GO:0080090;GO:1901700;GO:1903506;GO:2000112;GO:2001141;GO:0008152;GO:0006139;GO:0006351;GO:0006725;GO:0006807;GO:…	GO:0005575;GO:0005622;GO:0005623;GO:0005634;GO:0005737;GO:0032991;GO:0043226;GO:0043227;GO:0043229;GO:0043231;GO:0044424;GO:0044464;	Abscisic stress-ripening protein	abscisic stress-ripening protein 2-like
Cla97C08G147460	1641	194.96	636.619	1.70227	1.78e-45	1.88e-43	Up	NA	NA	NA	GO:0001906;GO:0008150;GO:0031640;GO:0035821;GO:0044364;GO:0044419;GO:0051704;	GO:0005575;GO:0005622;GO:0005623;GO:0005737;GO:0005783;GO:0012505;GO:0043226;GO:0043227;GO:0043229;GO:0043231;GO:0044424;GO:0044444;GO:0044464;	Encoded by	rRNA N-glycosidase
Cla97C08G147630	444	39.5153	79.8416	1.01163	0.000137843	0.00104684	Up	NA	NA	NA	NA	NA	NA	Zinc finger BED domain-containing protein RICESLEEPER 2-like
Cla97C08G148950	2232	21.0144	42.7564	1.02918	0.00345303	0.0169106	Up	NA	NA	GO:0003674;GO:0003824;GO:0004672;GO:0004674;GO:0016301;GO:0016740;GO:0016772;GO:0016773;GO:0140096;	GO:0000902;GO:0001101;GO:0005975;GO:0006464;GO:0006468;GO:0006793;GO:0006796;GO:0006807;GO:0006884;GO:0006950;GO:0006952;GO:0007154;GO:0007165;GO:0007166;GO:0008150;GO:0008152;GO:0008361;GO:0009311;GO:0009605;GO:0009607;GO:0009615;GO:0009620;GO:0009653;GO:0009719;GO:0009725;GO:0009751;GO:0009826;GO:0009987;GO:0009992;GO:0010033;GO:0014070;GO:0016043;GO:0016049;GO:0016310;GO:0019538;GO:0019725;GO:…	GO:0005575;GO:0005618;GO:0005622;GO:0005623;GO:0005737;GO:0005773;GO:0005886;GO:0009505;GO:0016020;GO:0030312;GO:0043226;GO:0043227;GO:0043229;GO:0043231;GO:0044424;GO:0044444;GO:0044464;GO:0071944;	Wall-associated receptor kinase	wall-associated receptor kinase 2-like
Cla97C08G149220	1197	385.82	1235.58	1.67961	4.65e-82	8.69e-80	Up	K03921 FAB2, SSI2, desA1; acyl-[acyl-carrier-protein] desaturase [EC:1.14.19.2 1.14.19.11 1.14.19.26]	ko00061:Fatty acid biosynthesis|ko01040:Biosynthesis of unsaturated fatty acids	NA	NA	GO:0005575;GO:0016020;	Introduction of a cis double bond between carbons of the acyl chain	Acyl-[acyl-carrier-protein] desaturase
Cla97C08G152220	210	14.7971	32.0443	1.12258	0.00713663	0.0310073	Up	NA	NA	NA	NA	NA	NA	Unknown protein
Cla97C08G152740	1461	2918.14	6466.44	1.14729	1.35e-160	5.55e-158	Up	NA	NA	NA	NA	NA	ankyrin repeat-containing protein	Ankyrin repeat-containing protein
Cla97C08G153400	672	6.45569	25.6961	1.97126	0.000283689	0.00196653	Up	K09264 K09264; MADS-box transcription factor, plant	NA	GO:0003674;GO:0003676;GO:0003677;GO:0003700;GO:0005488;GO:0005515;GO:0046982;GO:0046983;GO:0097159;GO:0140110;GO:1901363;	GO:0000003;GO:0003006;GO:0006355;GO:0007275;GO:0008150;GO:0009653;GO:0009791;GO:0009888;GO:0009889;GO:0009891;GO:0009893;GO:0009908;GO:0009909;GO:0009911;GO:0009933;GO:0010022;GO:0010073;GO:0010468;GO:0010556;GO:0010557;GO:0010582;GO:0010604;GO:0010628;GO:0019219;GO:0019222;GO:0022414;GO:0031323;GO:0031325;GO:0031326;GO:0031328;GO:0032501;GO:0032502;GO:0045893;GO:0045935;GO:0048367;GO:0048507;GO:…	GO:0005575;GO:0005622;GO:0005623;GO:0005634;GO:0043226;GO:0043227;GO:0043229;GO:0043231;GO:0044424;GO:0044464;	Floral homeotic protein APETALA	Transcription factor CAULIFLOWER
Cla97C08G159060	1218	18.6396	42.138	1.18382	0.00165289	0.00905187	Up	NA	NA	GO:0000166;GO:0003674;GO:0003824;GO:0004672;GO:0004674;GO:0004683;GO:0005488;GO:0005515;GO:0005524;GO:0008092;GO:0008144;GO:0016301;GO:0016740;GO:0016772;GO:0016773;GO:0016905;GO:0017022;GO:0017076;GO:0030554;GO:0032553;GO:0032555;GO:0032559;GO:0035639;GO:0036094;GO:0043167;GO:0043168;GO:0045159;GO:0097159;GO:0097367;GO:0140096;GO:1901265;GO:1901363;	GO:0000003;GO:0000278;GO:0000281;GO:0000910;GO:0006464;GO:0006468;GO:0006793;GO:0006796;GO:0006807;GO:0006996;GO:0007010;GO:0007049;GO:0008150;GO:0008152;GO:0009846;GO:0009856;GO:0009987;GO:0016043;GO:0016310;GO:0018107;GO:0018193;GO:0018210;GO:0019538;GO:0022402;GO:0022411;GO:0022414;GO:0030029;GO:0030036;GO:0031033;GO:0031035;GO:0031037;GO:0031038;GO:0032501;GO:0032984;GO:0036211;GO:0043170;GO:…	GO:0005575;GO:0005622;GO:0005623;GO:0005634;GO:0005737;GO:0005826;GO:0005856;GO:0005938;GO:0015629;GO:0030863;GO:0030864;GO:0032153;GO:0032155;GO:0043226;GO:0043227;GO:0043228;GO:0043229;GO:0043231;GO:0043232;GO:0044422;GO:0044424;GO:0044430;GO:0044444;GO:0044446;GO:0044448;GO:0044464;GO:0070938;GO:0071944;GO:0099568;	Vegetative incompatibility protein	Transducin/WD40 repeat-like superfamily protein
Cla97C09G162230	234	4.66057	16.73	1.81186	0.0105373	0.0426608	Up	NA	NA	NA	NA	NA	NA	Unknown protein
Cla97C09G167170	783	10.3804	39.0984	1.90686	1.42e-05	0.000137889	Up	NA	NA	NA	NA	NA	Short-chain dehydrogenase reductase	Short-chain dehydrogenase reductase 3b-like
Cla97C09G167220	396	92.021	488.426	2.40891	3.25e-65	4.86e-63	Up	NA	NA	NA	NA	NA	NPR1 interacting	Protein NIM1-INTERACTING 1
Cla97C09G176990	1173	11.2396	40.5371	1.83323	2.58e-05	0.000236535	Up	K01184 E3.2.1.15; polygalacturonase [EC:3.2.1.15]	ko00040:Pentose and glucuronate interconversions	NA	NA	GO:0005575;GO:0005576;GO:0005618;GO:0005623;GO:0030312;GO:0044464;GO:0071944;	Polygalacturonase-like	Pectin lyase-like superfamily protein
Cla97C09G178540	1350	319.126	1189.48	1.90167	1.85e-112	4.6e-110	Up	NA	NA	GO:0003674;GO:0003824;GO:0016740;GO:0016746;GO:0016747;GO:0047634;	NA	NA	Isoflavonoid malonyl transferase	malonyl-CoA:anthocyanidin 5-O-glucoside-6''-O-malonyltransferase-like
Cla97C09G181310	465	18.8454	38.1053	1.02848	0.00991546	0.0405415	Up	NA	NA	GO:0003674;GO:0005488;GO:0048037;GO:0051536;GO:0051540;	NA	GO:0005575;GO:0005623;GO:0005886;GO:0016020;GO:0044464;GO:0071944;	Belongs to the Casparian strip membrane proteins (CASP) family	CASP-like protein
Cla97C09G182690	231	22.3999	54.7916	1.29468	5.24e-05	0.0004485	Up	NA	NA	NA	NA	NA	NA	Unknown protein
Cla97C09G182730	3258	88.9046	185.853	1.06924	6.6e-09	1.12e-07	Up	K17964 LRPPRC; leucine-rich PPR motif-containing protein, mitochondrial	NA	GO:0003674;GO:0003676;GO:0003723;GO:0003824;GO:0004518;GO:0004519;GO:0005488;GO:0016787;GO:0016788;GO:0097159;GO:1901363;	GO:0006139;GO:0006725;GO:0006807;GO:0008150;GO:0008152;GO:0009451;GO:0009987;GO:0016070;GO:0034641;GO:0043170;GO:0043412;GO:0044237;GO:0044238;GO:0046483;GO:0071704;GO:0090304;GO:0090305;GO:1901360;	GO:0005575;GO:0005622;GO:0005623;GO:0043226;GO:0043227;GO:0043229;GO:0043231;GO:0044424;GO:0044464;	Pentatricopeptide repeat-containing protein	Pentatricopeptide repeat-containing protein
Cla97C10G184890	1164	18.242	45.0398	1.29482	0.000373972	0.00249224	Up	NA	NA	GO:0003674;GO:0003824;GO:0016787;GO:0016788;	GO:0001101;GO:0006950;GO:0008150;GO:0009605;GO:0009607;GO:0009611;GO:0009615;GO:0009620;GO:0009719;GO:0009723;GO:0009725;GO:0009751;GO:0009753;GO:0010033;GO:0014070;GO:0042221;GO:0042493;GO:0043207;GO:0046677;GO:0050896;GO:0051704;GO:0051707;GO:1901700;	GO:0005575;GO:0005622;GO:0005623;GO:0005737;GO:0005783;GO:0012505;GO:0016020;GO:0043226;GO:0043227;GO:0043229;GO:0043231;GO:0044424;GO:0044444;GO:0044464;	Adipocyte plasma membrane-associated	protein STRICTOSIDINE SYNTHASE-LIKE 6-like
Cla97C10G185780	1998	20.3114	51.5532	1.34878	7.95e-05	0.000646535	Up	K26271 MS1, MMD1; PHD finger protein MS1/MMD1	NA	GO:0003674;GO:0003676;GO:0003677;GO:0003682;GO:0005488;GO:0005515;GO:0008134;GO:0033613;GO:0042393;GO:0043565;GO:0097159;GO:1901363;GO:1990188;	GO:0000003;GO:0000212;GO:0000226;GO:0000280;GO:0003006;GO:0006323;GO:0006355;GO:0006996;GO:0007010;GO:0007017;GO:0007049;GO:0007051;GO:0007059;GO:0007060;GO:0007140;GO:0007275;GO:0007276;GO:0008150;GO:0009555;GO:0009889;GO:0009987;GO:0010032;GO:0010468;GO:0010556;GO:0016043;GO:0019219;GO:0019222;GO:0019953;GO:0022402;GO:0022412;GO:0022414;GO:0030154;GO:0030261;GO:0031323;GO:0031326;GO:0032501;GO:…	GO:0000228;GO:0000785;GO:0000790;GO:0000791;GO:0005575;GO:0005622;GO:0005623;GO:0005634;GO:0005694;GO:0005719;GO:0031974;GO:0031981;GO:0043226;GO:0043227;GO:0043228;GO:0043229;GO:0043231;GO:0043232;GO:0043233;GO:0044422;GO:0044424;GO:0044427;GO:0044428;GO:0044446;GO:0044454;GO:0044464;GO:0070013;	PHD finger protein MALE MEIOCYTE DEATH	PHD domain-containing protein
Cla97C10G185860	1497	124.422	345.562	1.46981	8.63e-28	5.62e-26	Up	K00938 E2.7.4.2, mvaK2; phosphomevalonate kinase [EC:2.7.4.2]	ko00900:Terpenoid backbone biosynthesis	GO:0003674;GO:0003824;GO:0004631;GO:0016301;GO:0016740;GO:0016772;GO:0016776;	GO:0006066;GO:0006084;GO:0006139;GO:0006163;GO:0006629;GO:0006637;GO:0006644;GO:0006694;GO:0006696;GO:0006720;GO:0006725;GO:0006732;GO:0006753;GO:0006790;GO:0006793;GO:0006796;GO:0006807;GO:0008150;GO:0008152;GO:0008202;GO:0008204;GO:0008299;GO:0008610;GO:0008654;GO:0009058;GO:0009117;GO:0009150;GO:0009240;GO:0009259;GO:0009987;GO:0016125;GO:0016126;GO:0016128;GO:0016129;GO:0016310;GO:0019287;GO:…	GO:0005575;GO:0005622;GO:0005623;GO:0005737;GO:0005777;GO:0042579;GO:0043226;GO:0043227;GO:0043229;GO:0043231;GO:0044424;GO:0044444;GO:0044464;	Phosphomevalonate	Phosphomevalonate kinase
Cla97C10G186190	732	26.4976	65.1703	1.31664	8.13e-05	0.000659987	Up	NA	NA	NA	NA	NA	NA	glycine-rich cell wall structural protein 1.8-like
Cla97C10G187780	585	18.2504	40.2904	1.14798	0.00163503	0.00896138	Up	NA	NA	NA	GO:0006950;GO:0006952;GO:0007154;GO:0007165;GO:0008150;GO:0009987;GO:0023052;GO:0050789;GO:0050794;GO:0050896;GO:0051716;GO:0065007;	GO:0005575;GO:0005623;GO:0005886;GO:0016020;GO:0044464;GO:0071944;	Belongs to the disease resistance NB-LRR family	disease resistance protein RGA2-like
Cla97C10G188160	1860	85.4157	1052.71	3.62928	4.73e-208	2.58e-205	Up	NA	NA	NA	NA	NA	glutamyl-tRNA(Gln) amidotransferase subunit	glutamyl-tRNA(Gln) amidotransferase subunit A
Cla97C10G189060	378	19.1713	42.1981	1.1385	0.00259358	0.0132878	Up	NA	NA	NA	NA	NA	NA	hydroxyproline-rich glycoprotein family protein
Cla97C10G189870	1101	22.4379	61.8042	1.44475	1.98e-05	0.000185965	Up	K03146 THI4, THI1; cysteine-dependent adenosine diphosphate thiazole synthase [EC:2.4.2.60]	ko00730:Thiamine metabolism	GO:0003674;GO:0005488;GO:0005506;GO:0043167;GO:0043169;GO:0046872;GO:0046914;	GO:0006725;GO:0006766;GO:0006767;GO:0006772;GO:0006790;GO:0006807;GO:0008150;GO:0008152;GO:0009058;GO:0009110;GO:0009228;GO:0009987;GO:0017144;GO:0018130;GO:0018131;GO:0019438;GO:0034641;GO:0042364;GO:0042723;GO:0042724;GO:0044237;GO:0044249;GO:0044271;GO:0044272;GO:0044281;GO:0044283;GO:0046483;GO:0046484;GO:0052837;GO:0052838;GO:0071704;GO:0072527;GO:0072528;GO:1901360;GO:1901362;GO:1901564;GO:…	GO:0005575;GO:0005622;GO:0005623;GO:0005737;GO:0005829;GO:0044424;GO:0044444;GO:0044464;	Involved in biosynthesis of the thiamine precursor thiazole. Catalyzes the conversion of NAD and glycine to adenosine diphosphate 5-(2-hydroxyethyl)-4-methylthiazole-2-carboxylic acid (ADT), an adenylated thiazole intermediate. The reaction includes an iron-dependent sulfide transfer from a conserved cysteine residue of the protein to a thiazole intermediate. The enzyme can only undergo a single …	Thiamine thiazole synthase, chloroplastic
Cla97C10G190580	1023	51.1853	120.536	1.23153	7.49e-08	1.1e-06	Up	NA	NA	GO:0001067;GO:0003674;GO:0003676;GO:0003677;GO:0003700;GO:0005488;GO:0043565;GO:0044212;GO:0097159;GO:0140110;GO:1901363;	GO:0000003;GO:0003006;GO:0006355;GO:0007275;GO:0008150;GO:0009555;GO:0009653;GO:0009791;GO:0009888;GO:0009889;GO:0009908;GO:0010154;GO:0010468;GO:0010556;GO:0019219;GO:0019222;GO:0022414;GO:0031323;GO:0031326;GO:0032501;GO:0032502;GO:0035670;GO:0045995;GO:0048229;GO:0048316;GO:0048317;GO:0048367;GO:0048437;GO:0048438;GO:0048440;GO:0048443;GO:0048466;GO:0048467;GO:0048481;GO:0048608;GO:0048653;GO:…	GO:0005575;GO:0005622;GO:0005623;GO:0005634;GO:0043226;GO:0043227;GO:0043229;GO:0043231;GO:0044424;GO:0044464;	NAC domain-containing protein	NAC domain-containing protein
Cla97C10G192620	270	13.9982	30.5732	1.12849	0.0123866	0.048778	Up	NA	NA	NA	NA	NA	NA	Unknown protein
Cla97C10G193360	216	52.1132	109.253	1.06246	7.15e-06	7.4e-05	Up	NA	NA	NA	NA	NA	NA	Unknown protein
Cla97C10G193560	1218	0.668701	17.1435	4.62694	7.31e-05	0.000600068	Up	NA	NA	GO:0003674;GO:0003824;GO:0016740;GO:0016746;	GO:0005975;GO:0005984;GO:0005985;GO:0008150;GO:0008152;GO:0009311;GO:0009987;GO:0044237;GO:0044238;GO:0044262;GO:0071704;	NA	Transferase family	vinorine synthase-like
Cla97C10G194080	3285	77.119	213.625	1.46458	6.51e-17	2.46e-15	Up	K00770 E2.4.2.24; 1,4-beta-D-xylan synthase [EC:2.4.2.24]	ko00520:Amino sugar and nucleotide sugar metabolism	GO:0000030;GO:0003674;GO:0003824;GO:0016740;GO:0016757;GO:0016758;GO:0019187;GO:0046527;GO:0051753;	GO:0000278;GO:0000281;GO:0000910;GO:0000911;GO:0000919;GO:0001101;GO:0006950;GO:0006970;GO:0007049;GO:0007275;GO:0008150;GO:0008152;GO:0009414;GO:0009415;GO:0009628;GO:0009651;GO:0009987;GO:0010035;GO:0016043;GO:0022402;GO:0022607;GO:0032501;GO:0032502;GO:0032506;GO:0042221;GO:0042546;GO:0044085;GO:0048367;GO:0048731;GO:0048856;GO:0050896;GO:0051301;GO:0061640;GO:0070085;GO:0071554;GO:0071669;GO:…	GO:0005575;GO:0005622;GO:0005623;GO:0005737;GO:0005794;GO:0012505;GO:0043226;GO:0043227;GO:0043229;GO:0043231;GO:0044424;GO:0044444;GO:0044464;	Belongs to the glycosyltransferase 2 family	Cellulose synthase-like protein
Cla97C10G194450	1020	1.3169	17.786	3.68879	4.71e-05	0.000406218	Up	K04125 GA2ox; gibberellin 2beta-dioxygenase [EC:1.14.11.13]	ko00904:Diterpenoid biosynthesis	GO:0003674;GO:0003824;GO:0016491;GO:0016705;GO:0016706;GO:0045543;GO:0051213;GO:0052634;	GO:0006082;GO:0006629;GO:0006720;GO:0006721;GO:0008150;GO:0008152;GO:0008300;GO:0009056;GO:0009314;GO:0009416;GO:0009628;GO:0009639;GO:0009685;GO:0009987;GO:0010817;GO:0016042;GO:0016054;GO:0016101;GO:0016103;GO:0016115;GO:0019752;GO:0042445;GO:0042447;GO:0043436;GO:0044237;GO:0044238;GO:0044242;GO:0044248;GO:0044255;GO:0044281;GO:0044282;GO:0045487;GO:0046395;GO:0050896;GO:0055114;GO:0065007;GO:…	NA	Belongs to the iron ascorbate-dependent oxidoreductase family	gibberellin 2-beta-dioxygenase 2
Cla97C10G195870	978	9.18007	23.7429	1.3821	0.00585938	0.0264213	Up	K09753 CCR; cinnamoyl-CoA reductase [EC:1.2.1.44]	ko00940:Phenylpropanoid biosynthesis	GO:0003674;GO:0003824;GO:0016491;GO:0016620;GO:0016621;GO:0016903;	GO:0006725;GO:0006950;GO:0007623;GO:0008150;GO:0008152;GO:0009058;GO:0009266;GO:0009409;GO:0009628;GO:0009698;GO:0009699;GO:0009808;GO:0009809;GO:0009987;GO:0019438;GO:0019748;GO:0042752;GO:0042754;GO:0044237;GO:0044249;GO:0044550;GO:0048511;GO:0048519;GO:0050789;GO:0050896;GO:0055114;GO:0065007;GO:0071704;GO:1901360;GO:1901362;GO:1901576;	GO:0005575;GO:0005622;GO:0005623;GO:0005737;GO:0005829;GO:0044424;GO:0044444;GO:0044464;	Cinnamoyl-CoA reductase	cinnamoyl coa reductase
Cla97C10G197630	1608	44.5857	148.514	1.73021	3.73e-15	1.21e-13	Up	NA	NA	GO:0003674;GO:0003824;GO:0005215;GO:0008320;GO:0008565;GO:0016462;GO:0016787;GO:0016817;GO:0016818;GO:0016887;GO:0017111;GO:0022857;GO:0022884;GO:0042887;GO:1904680;	GO:0000003;GO:0000302;GO:0000304;GO:0001101;GO:0003006;GO:0006810;GO:0006950;GO:0006970;GO:0006979;GO:0007275;GO:0007584;GO:0008104;GO:0008150;GO:0009266;GO:0009409;GO:0009414;GO:0009415;GO:0009605;GO:0009628;GO:0009651;GO:0009719;GO:0009725;GO:0009737;GO:0009791;GO:0009987;GO:0009991;GO:0010033;GO:0010035;GO:0010154;GO:0010431;GO:0015031;GO:0015833;GO:0016043;GO:0021700;GO:0022414;GO:0022607;GO:…	GO:0005575;GO:0005622;GO:0005623;GO:0005737;GO:0005739;GO:0005783;GO:0005911;GO:0009506;GO:0012505;GO:0030054;GO:0043226;GO:0043227;GO:0043229;GO:0043231;GO:0044424;GO:0044444;GO:0044464;GO:0055044;	Belongs to the AAA ATPase family	AAA-ATPase ASD
Cla97C10G198020	591	9.09772	55.1441	2.60408	4.01e-10	8.05e-09	Up	K01166 RNASET2; ribonuclease T2 [EC:4.6.1.19]	NA	NA	NA	NA	Belongs to the RNase T2 family	Ribonuclease T(2)
Cla97C10G198160	771	46.4646	140.647	1.60066	5.86e-14	1.73e-12	Up	NA	NA	NA	NA	NA	Protein of unknown function (DUF1997)	Protein of unknown function (DUF1997)
Cla97C10G198200	735	33.1542	118.996	1.83608	5.16e-14	1.54e-12	Up	K09422 MYBP; transcription factor MYB, plant	NA	GO:0000981;GO:0001067;GO:0001134;GO:0001135;GO:0003674;GO:0003676;GO:0003677;GO:0003700;GO:0005488;GO:0043565;GO:0044212;GO:0097159;GO:0140110;GO:1901363;GO:0005515;GO:0008134;	GO:0000902;GO:0000904;GO:0001101;GO:0003002;GO:0006355;GO:0006357;GO:0006950;GO:0006970;GO:0007275;GO:0007389;GO:0008150;GO:0009628;GO:0009651;GO:0009653;GO:0009719;GO:0009723;GO:0009725;GO:0009733;GO:0009739;GO:0009751;GO:0009753;GO:0009888;GO:0009889;GO:0009987;GO:0010026;GO:0010033;GO:0010035;GO:0010038;GO:0010090;GO:0010091;GO:0010468;GO:0010556;GO:0014070;GO:0016043;GO:0019219;GO:0019222;GO:…	GO:0005575;GO:0005622;GO:0005623;GO:0005634;GO:0043226;GO:0043227;GO:0043229;GO:0043231;GO:0044424;GO:0044464;	transcription factor	MYB-related transcription factor
Cla97C10G202590	1401	566.3	1340.26	1.24178	5e-66	7.54e-64	Up	NA	NA	NA	NA	NA	Myb/SANT-like DNA-binding domain	sequence-specific DNA binding transcription factors
Cla97C10G203590	969	157.422	1019.34	2.69324	1.3e-138	4.36e-136	Up	K00430 E1.11.1.7; peroxidase [EC:1.11.1.7]	ko00940:Phenylpropanoid biosynthesis	GO:0003674;GO:0003824;GO:0004601;GO:0016209;GO:0016491;GO:0016684;	GO:0006950;GO:0006952;GO:0008150;GO:0008152;GO:0009605;GO:0009607;GO:0009620;GO:0009636;GO:0009664;GO:0009987;GO:0016043;GO:0042221;GO:0043207;GO:0045229;GO:0050832;GO:0050896;GO:0051704;GO:0051707;GO:0051716;GO:0055114;GO:0070887;GO:0071554;GO:0071555;GO:0071669;GO:0071840;GO:0097237;GO:0098542;GO:0098754;GO:0098869;GO:1990748;	GO:0005575;GO:0005618;GO:0005622;GO:0005623;GO:0005737;GO:0005829;GO:0005911;GO:0009505;GO:0009506;GO:0030054;GO:0030312;GO:0044424;GO:0044444;GO:0044464;GO:0055044;GO:0071944;	Removal of H(2)O(2), oxidation of toxic reductants, biosynthesis and degradation of lignin, suberization, auxin catabolism, response to environmental stresses such as wounding, pathogen attack and oxidative stress	Peroxidase
Cla97C10G205510	882	251.916	728.249	1.53295	1.13e-57	1.47e-55	Up	NA	NA	GO:0003674;GO:0005488;GO:0030246;	GO:0008150;GO:0009605;GO:0009607;GO:0009617;GO:0043207;GO:0050896;GO:0051704;GO:0051707;	GO:0005575;GO:0005622;GO:0005623;GO:0005737;GO:0005773;GO:0005774;GO:0016020;GO:0031090;GO:0043226;GO:0043227;GO:0043229;GO:0043231;GO:0044422;GO:0044424;GO:0044437;GO:0044444;GO:0044446;GO:0044464;GO:0098588;GO:0098805;	P-loop nucleoside triphosphate hydrolase superfamily protein	P-loop containing nucleoside triphosphate hydrolases superfamily protein
Cla97C10G206240	831	822.51	1740.66	1.08249	1.11e-67	1.75e-65	Up	NA	NA	GO:0003674;GO:0003700;GO:0140110;	GO:0001101;GO:0002218;GO:0002252;GO:0002253;GO:0002376;GO:0002682;GO:0002684;GO:0006355;GO:0006950;GO:0006952;GO:0006955;GO:0007154;GO:0007165;GO:0008150;GO:0009605;GO:0009607;GO:0009617;GO:0009620;GO:0009627;GO:0009682;GO:0009719;GO:0009725;GO:0009751;GO:0009753;GO:0009755;GO:0009814;GO:0009862;GO:0009863;GO:0009864;GO:0009867;GO:0009889;GO:0009890;GO:0009892;GO:0009987;GO:0010033;GO:0010200;GO:…	NA	WRKY transcription factor	WRKY protein
Cla97C11G206930	840	118.175	291.218	1.30429	5.16e-18	2.11e-16	Up	K20416 FAD5; palmitoyl-[glycerolipid] 7-desaturase [EC:1.14.19.42]	NA	NA	NA	NA	Palmitoyl-monogalactosyldiacylglycerol delta-7 desaturase, chloroplastic-like	palmitoyl-monogalactosyldiacylglycerol delta-7 desaturase, chloroplastic-like
Cla97C11G207650	456	13.9982	132.889	3.25206	1.06e-27	6.84e-26	Up	NA	NA	GO:0003674;GO:0005488;GO:0005507;GO:0043167;GO:0043169;GO:0046872;GO:0046914;	GO:0000003;GO:0003006;GO:0007275;GO:0008150;GO:0009719;GO:0009725;GO:0009735;GO:0009791;GO:0010033;GO:0010035;GO:0010038;GO:0010043;GO:0010228;GO:0014070;GO:0022414;GO:0032501;GO:0032502;GO:0042221;GO:0048608;GO:0048731;GO:0048856;GO:0050896;GO:0061458;GO:0080184;	GO:0005575;GO:0005622;GO:0005623;GO:0005737;GO:0005829;GO:0044424;GO:0044444;GO:0044464;	MLP-like protein	MLP-like protein 328
Cla97C11G209110	1383	19.2673	43.9525	1.19473	0.00159353	0.00876722	Up	NA	NA	GO:0001871;GO:0003674;GO:0003824;GO:0004553;GO:0005488;GO:0016787;GO:0016798;GO:0030246;GO:0030247;	GO:0008150;GO:0009664;GO:0009987;GO:0016043;GO:0045229;GO:0071554;GO:0071555;GO:0071669;GO:0071840;	GO:0005575;GO:0005576;GO:0005623;GO:0005886;GO:0005911;GO:0009506;GO:0016020;GO:0030054;GO:0031224;GO:0031225;GO:0031226;GO:0044425;GO:0044459;GO:0044464;GO:0046658;GO:0048046;GO:0055044;GO:0071944;	Belongs to the glycosyl hydrolase 17 family	Glucan endo-1,3-beta-D-glucosidase
Cla97C11G209540	735	7.9918	25.0479	1.6459	0.00155796	0.00859967	Up	NA	NA	GO:0003674;GO:0003700;GO:0140110;	GO:0006355;GO:0008150;GO:0009889;GO:0010468;GO:0010556;GO:0019219;GO:0019222;GO:0031323;GO:0031326;GO:0050789;GO:0050794;GO:0051171;GO:0051252;GO:0060255;GO:0065007;GO:0080090;GO:1903506;GO:2000112;GO:2001141;GO:0008152;GO:0006139;GO:0006351;GO:0006725;GO:0006807;GO:0009058;GO:0009059;GO:0009987;GO:0010467;GO:0016070;GO:0018130;GO:0019438;GO:0032774;GO:0034641;GO:0034645;GO:0034654;GO:0043170;GO:…	NA	Ethylene-responsive transcription factor WIN1-like	Ethylene-responsive transcription factor WIN1-like
Cla97C11G209650	645	119.981	251.566	1.06683	1.02e-12	2.69e-11	Up	NA	NA	NA	NA	NA	Umecyanin-like	Cucumber peeling cupredoxin-like
Cla97C11G210270	294	2.76399	22.8581	3.03865	1.01e-05	0.000101133	Up	K14488 SAUR; SAUR family protein	ko04075:Plant hormone signal transduction	NA	NA	NA	Auxin responsive protein	auxin-responsive protein SAUR21-like
Cla97C11G211230	315	17.0143	38.8835	1.19137	0.00254812	0.0130881	Up	NA	NA	NA	NA	NA	Organ-specific protein	organ-specific protein P4-like
Cla97C11G211530	1116	8.96908	23.8299	1.43134	0.00543506	0.0247454	Up	NA	NA	NA	NA	NA	NA	F-box protein
Cla97C11G212080	195	76.0179	181.341	1.25858	2.65e-12	6.7e-11	Up	NA	NA	NA	NA	NA	NA	stress-induced protein KIN2-like
Cla97C11G214590	306	9.78709	53.5362	2.45537	7.31e-10	1.42e-08	Up	NA	NA	NA	NA	NA	NA	Unknown protein
Cla97C11G216360	342	8.52347	40.8823	2.24221	5.66e-07	7.24e-06	Up	K15382 SLC50A, SWEET; solute carrier family 50 (sugar transporter)	NA	GO:0003674;GO:0005215;GO:0008515;GO:0015144;GO:0015154;GO:0015157;GO:0022857;GO:0051119;	GO:0006810;GO:0008150;GO:0008643;GO:0015766;GO:0015770;GO:0015772;GO:0034219;GO:0046903;GO:0051179;GO:0051234;GO:0055085;GO:0071702;GO:0071836;	GO:0000139;GO:0005575;GO:0005622;GO:0005623;GO:0005737;GO:0005794;GO:0005802;GO:0005886;GO:0005887;GO:0012505;GO:0012506;GO:0016020;GO:0016021;GO:0031090;GO:0031224;GO:0031226;GO:0031982;GO:0031984;GO:0032588;GO:0043226;GO:0043227;GO:0043229;GO:0043231;GO:0044422;GO:0044424;GO:0044425;GO:0044431;GO:0044444;GO:0044446;GO:0044459;GO:0044464;GO:0071944;GO:0098588;GO:0098791;	Mediates both low-affinity uptake and efflux of sugar across the membrane	Bidirectional sugar transporter SWEET
Cla97C11G216560	1446	1.00305	11.0697	3.41947	0.00208808	0.0110543	Up	K03320 amt, AMT, MEP; ammonium transporter, Amt family	NA	GO:0003674;GO:0005215;GO:0008324;GO:0008519;GO:0015075;GO:0022857;	GO:0006810;GO:0006811;GO:0006812;GO:0008150;GO:0009605;GO:0009607;GO:0009624;GO:0015695;GO:0015696;GO:0015837;GO:0015843;GO:0019755;GO:0034220;GO:0043207;GO:0050896;GO:0051179;GO:0051234;GO:0051704;GO:0051707;GO:0055085;GO:0071702;GO:0071705;GO:0072488;GO:0098655;	GO:0005575;GO:0005623;GO:0005886;GO:0005887;GO:0016020;GO:0016021;GO:0031224;GO:0031226;GO:0044425;GO:0044459;GO:0044464;GO:0071944;	Ammonium transporter	Ammonium transporter
Cla97C11G218180	1644	8.5098	21.5999	1.32567	0.0121194	0.0478844	Up	K08248 MDL3; (R)-mandelonitrile lyase [EC:4.1.2.10]	ko00460:Cyanoamino acid metabolism	NA	NA	GO:0005575;GO:0005622;GO:0005623;GO:0005737;GO:0031410;GO:0031982;GO:0033095;GO:0043226;GO:0043227;GO:0043229;GO:0044424;GO:0044444;GO:0044464;GO:0097708;	(R)-mandelonitrile lyase	(R)-mandelonitrile lyase 1-like
Cla97C11G219090	3894	10.8106	25.7653	1.25244	0.0103103	0.0419014	Up	K05658 ABCB1, CD243; ATP-binding cassette, subfamily B (MDR/TAP), member 1 [EC:7.6.2.2]	ko02010:ABC transporters	GO:0003674;GO:0005215;GO:0010329;GO:0015562;GO:0022857;GO:0080161;	GO:0006810;GO:0008150;GO:0009914;GO:0009926;GO:0009966;GO:0010315;GO:0010540;GO:0010646;GO:0010817;GO:0010928;GO:0023051;GO:0048583;GO:0050789;GO:0050794;GO:0051179;GO:0051234;GO:0055085;GO:0060918;GO:0065007;GO:0065008;GO:0007165;GO:0007154;GO:0009987;GO:0023052;GO:0050896;GO:0051716;GO:0009719;GO:0009725;GO:0009733;GO:0009734;GO:0009755;GO:0010033;GO:0070887;GO:0032870;GO:0042221;GO:0071310;GO:…	GO:0005575;GO:0005623;GO:0005886;GO:0005911;GO:0009506;GO:0016020;GO:0030054;GO:0044464;GO:0055044;GO:0071944;	ABC transporter B family member	ABC transporter B family protein
Cla97C11G222860	672	14.0995	32.6559	1.20202	0.00364829	0.0177627	Up	NA	NA	GO:0003674;GO:0003824;GO:0008194;GO:0016740;GO:0016757;GO:0016758;GO:0035251;GO:0046527;GO:0080043;GO:0080044;GO:0080046;	GO:0001101;GO:0006066;GO:0006082;GO:0006629;GO:0006714;GO:0006720;GO:0006721;GO:0006950;GO:0006970;GO:0008150;GO:0008152;GO:0008300;GO:0009056;GO:0009628;GO:0009651;GO:0009687;GO:0009719;GO:0009725;GO:0009737;GO:0009987;GO:0010033;GO:0016042;GO:0016054;GO:0016107;GO:0016115;GO:0019752;GO:0032787;GO:0033993;GO:0042221;GO:0043288;GO:0043290;GO:0043436;GO:0044237;GO:0044238;GO:0044242;GO:0044248;GO:…	GO:0005575;GO:0005622;GO:0005623;GO:0005737;GO:0005829;GO:0016020;GO:0043226;GO:0043227;GO:0043229;GO:0043231;GO:0044424;GO:0044444;GO:0044464;	Belongs to the UDP-glycosyltransferase family	Glycosyltransferase
Cla97C11G223130	1434	20.5583	45.1323	1.14386	0.00453129	0.021188	Up	NA	NA	NA	NA	NA	Pentatricopeptide repeat-containing protein	Pentatricopeptide repeat-containing protein
Cla97C11G223150	1074	211.796	592.674	1.4835	7.1e-45	7.38e-43	Up	NA	NA	GO:0003674;GO:0003824;GO:0016491;GO:0016679;GO:0016682;	GO:0007275;GO:0007568;GO:0008150;GO:0008152;GO:0010150;GO:0032501;GO:0032502;GO:0048366;GO:0048367;GO:0048731;GO:0048827;GO:0048856;GO:0055114;GO:0090693;GO:0099402;	NA	Belongs to the iron ascorbate-dependent oxidoreductase family	2-oxoglutarate (2OG) and Fe(II)-dependent oxygenase superfamily protein
Cla97C01G003790	1593	5.73371	21.5306	1.93165	0.00195766	0.0104571	Up	NA	NA	GO:0003674;GO:0003824;GO:0004497;GO:0016491;GO:0016705;GO:0016709;	GO:0008150;GO:0008152;GO:0009058;GO:0019748;GO:0044550;GO:0055114;	GO:0005575;GO:0016020;	Belongs to the cytochrome P450 family	cytochrome P450, family 706, subfamily A, polypeptide 3
Cla97C04G075540	813	3.13269	13.5634	2.11564	0.00814402	0.0345368	Up	NA	NA	NA	NA	NA	Protamine P1 family protein	FUNCTIONS IN: molecular_function unknown; INVOLVED IN: biological_process unknown; LOCATED IN: plasma membrane; BEST Arabidopsis thaliana protein match is: protamine P1 family protein .
Cla97C05G108200	1527	0.716713	39.6104	5.82751	7.51e-08	1.1e-06	Up	NA	NA	GO:0003674;GO:0003824;GO:0004497;GO:0016491;GO:0016705;GO:0016709;	GO:0006950;GO:0008150;GO:0008152;GO:0009058;GO:0009266;GO:0009408;GO:0009628;GO:0010286;GO:0019748;GO:0044550;GO:0050896;GO:0055114;	GO:0005575;GO:0016020;	Cytochrome p450	cytochrome P450 71B34-like
Cla97C07G129290	1629	1.43343	10.5032	2.90168	0.00380759	0.0184008	Up	K08176 PHO84; MFS transporter, PHS family, inorganic phosphate transporter	NA	GO:0003674;GO:0005215;GO:0005315;GO:0008509;GO:0015075;GO:0015291;GO:0015318;GO:0022804;GO:0022857;GO:1901683;	GO:0001101;GO:0006810;GO:0006811;GO:0006820;GO:0008150;GO:0009719;GO:0009725;GO:0009737;GO:0010033;GO:0033993;GO:0034220;GO:0042221;GO:0050896;GO:0051179;GO:0051234;GO:0055085;GO:0097305;GO:0098656;GO:1901684;GO:1901700;	GO:0005575;GO:0005622;GO:0005623;GO:0005634;GO:0005737;GO:0005773;GO:0005794;GO:0005886;GO:0005887;GO:0005911;GO:0009506;GO:0012505;GO:0016020;GO:0016021;GO:0030054;GO:0031224;GO:0031226;GO:0043226;GO:0043227;GO:0043229;GO:0043231;GO:0044424;GO:0044425;GO:0044444;GO:0044459;GO:0044464;GO:0055044;GO:0071944;	Inorganic phosphate transporter	Inorganic phosphate transporter 1-1
Cla97C09G171040	759	2.08846	18.3748	3.13705	7.45e-05	0.000610475	Up	NA	NA	NA	NA	NA	NA	Pentatricopeptide repeat-containing protein
Cla97C10G196680	531	2.60102	17.4192	2.80838	0.000284477	0.00197064	Up	NA	NA	NA	NA	NA	LOB domain-containing protein	LOB domain-containing protein
Cla97C04G076360	1854	1.31006	14.567	3.40714	0.000362042	0.00242716	Up	K01754 E4.3.1.19, ilvA, tdcB; threonine dehydratase [EC:4.3.1.19]	ko00260:Glycine, serine and threonine metabolism|ko00290:Valine, leucine and isoleucine biosynthesis	GO:0003674;GO:0005488;GO:0005515;GO:0042802;	NA	GO:0005575;GO:0005622;GO:0005623;GO:0005737;GO:0009507;GO:0009536;GO:0043226;GO:0043227;GO:0043229;GO:0043231;GO:0044424;GO:0044444;GO:0044464;	Threonine dehydratase biosynthetic	Threonine dehydratase
Cla97C06G115590	243	0.655031	9.18804	3.73765	0.00333206	0.0163931	Up	NA	NA	NA	NA	NA	NA	Unknown protein
Cla97C08G145240	387	0.982546	9.22551	3.1641	0.00550384	0.0250001	Up	NA	NA	NA	NA	NA	NA	Unknown protein
Cla97C09G174940	516	0.655031	169.622	7.92892	2.04e-14	6.32e-13	Up	NA	NA	NA	NA	NA	NA	Unknown protein
Cla97C01G006540	714	0	4.12066	4.41806	0.0079041	0.0337462	Up	NA	NA	NA	NA	NA	B3 domain-containing protein	B3 domain-containing protein At2g31420-like
Cla97C01G008220	213	0	11.0904	5.84653	2.11e-05	0.000196919	Up	NA	NA	NA	NA	NA	NA	Unknown protein
Cla97C01G019200	1107	0	5.04929	4.71248	0.00353235	0.0172524	Up	K21483 SAMT; salicylate 1-O-methyltransferase [EC:2.1.1.274]	NA	NA	NA	NA	Salicylate	S-adenosyl-L-methionine-dependent methyltransferases superfamily protein
Cla97C02G030290	855	0	7.28571	5.24045	0.000362661	0.00243034	Up	NA	NA	NA	NA	NA	Arabidopsis protein of unknown function	Arabidopsis protein of unknown function (DUF241)
Cla97C02G030390	789	0	29.5277	7.2587	8.28e-09	1.38e-07	Up	NA	NA	NA	NA	GO:0005575;GO:0005618;GO:0005622;GO:0005623;GO:0005737;GO:0005794;GO:0005829;GO:0005911;GO:0009505;GO:0009506;GO:0012505;GO:0016020;GO:0030054;GO:0030312;GO:0043226;GO:0043227;GO:0043229;GO:0043231;GO:0044424;GO:0044444;GO:0044464;GO:0055044;GO:0071944;	Belongs to the expansin family	expansin-like A2
Cla97C02G030410	792	0	5.71589	4.88962	0.00157135	0.00866409	Up	NA	NA	NA	NA	GO:0005575;GO:0005618;GO:0005622;GO:0005623;GO:0005737;GO:0005794;GO:0005829;GO:0005911;GO:0009505;GO:0009506;GO:0012505;GO:0016020;GO:0030054;GO:0030312;GO:0043226;GO:0043227;GO:0043229;GO:0043231;GO:0044424;GO:0044444;GO:0044464;GO:0055044;GO:0071944;	Belongs to the expansin family	Expansin A3-like protein
Cla97C02G043560	279	0	4.42173	4.52085	0.00591458	0.0266321	Up	K00815 TAT; tyrosine aminotransferase [EC:2.6.1.5]	ko00130:Ubiquinone and other terpenoid-quinone biosynthesis|ko00270:Cysteine and methionine metabolism|ko00350:Tyrosine metabolism|ko00360:Phenylalanine metabolism|ko00400:Phenylalanine, tyrosine and tryptophan biosynthesis|ko00950:Isoquinoline alkaloid biosynthesis|ko00960:Tropane, piperidine and pyridine alkaloid biosynthesis	GO:0003674;GO:0003824;GO:0004838;GO:0008483;GO:0016740;GO:0016769;GO:0070547;	GO:0006082;GO:0006520;GO:0006570;GO:0006572;GO:0006725;GO:0006807;GO:0008150;GO:0008152;GO:0009056;GO:0009063;GO:0009072;GO:0009074;GO:0009987;GO:0016054;GO:0019439;GO:0019752;GO:0043436;GO:0044237;GO:0044238;GO:0044248;GO:0044281;GO:0044282;GO:0046395;GO:0071704;GO:1901360;GO:1901361;GO:1901564;GO:1901565;GO:1901575;GO:1901605;GO:1901606;	GO:0005575;GO:0005622;GO:0005623;GO:0005737;GO:0005829;GO:0044424;GO:0044444;GO:0044464;	Aminotransferase	tyrosine aminotransferase-like
Cla97C03G066540	879	0	34.9219	7.50078	1.67e-09	3.08e-08	Up	K01738 cysK; cysteine synthase [EC:2.5.1.47]	ko00270:Cysteine and methionine metabolism|ko00920:Sulfur metabolism	GO:0003674;GO:0003824;GO:0004124;GO:0005488;GO:0008144;GO:0016740;GO:0016765;GO:0016829;GO:0016846;GO:0019842;GO:0030170;GO:0036094;GO:0043167;GO:0043168;GO:0048037;GO:0050662;GO:0070279;GO:0080146;GO:0097159;GO:1901363;	GO:0000096;GO:0000097;GO:0006082;GO:0006520;GO:0006534;GO:0006535;GO:0006563;GO:0006790;GO:0006807;GO:0008150;GO:0008152;GO:0008652;GO:0009058;GO:0009069;GO:0009070;GO:0009987;GO:0016053;GO:0019344;GO:0019752;GO:0042592;GO:0043436;GO:0044237;GO:0044238;GO:0044249;GO:0044272;GO:0044281;GO:0044283;GO:0046394;GO:0048878;GO:0050801;GO:0055080;GO:0055081;GO:0065007;GO:0065008;GO:0071704;GO:0080144;GO:…	GO:0005575;GO:0005622;GO:0005623;GO:0005737;GO:0044424;GO:0044464;	Belongs to the cysteine synthase cystathionine beta- synthase family	Cysteine synthase
Cla97C04G069820	597	0	4.11018	4.41514	0.00808395	0.034347	Up	NA	NA	NA	NA	NA	NA	Unknown protein
Cla97C05G105070	486	0	4.76631	4.62732	0.00391344	0.0187774	Up	K03574 mutT, NUDT15, MTH2; 8-oxo-dGTP diphosphatase [EC:3.6.1.55]	NA	GO:0003674;GO:0003824;GO:0008413;GO:0016462;GO:0016787;GO:0016817;GO:0016818;GO:0019177;GO:0035539;GO:0047429;	GO:0006139;GO:0006163;GO:0006195;GO:0006203;GO:0006725;GO:0006753;GO:0006793;GO:0006796;GO:0006807;GO:0006950;GO:0006974;GO:0008150;GO:0008152;GO:0009056;GO:0009058;GO:0009117;GO:0009141;GO:0009143;GO:0009144;GO:0009146;GO:0009151;GO:0009155;GO:0009166;GO:0009200;GO:0009204;GO:0009215;GO:0009217;GO:0009262;GO:0009264;GO:0009394;GO:0009987;GO:0018130;GO:0019438;GO:0019439;GO:0019637;GO:0019692;GO:…	GO:0005575;GO:0005622;GO:0005623;GO:0005737;GO:0005829;GO:0044424;GO:0044444;GO:0044464;	Belongs to the Nudix hydrolase family	Nudix hydrolase
Cla97C07G136250	1026	0	6.00806	4.96281	0.00114086	0.00658359	Up	NA	NA	NA	NA	NA	MADS-box transcription factor	agamous-like MADS-box protein AGL104
Cla97C07G144360	183	0	7.59726	5.30107	0.000283626	0.00196653	Up	NA	NA	NA	NA	NA	NA	Unknown protein
Cla97C08G147530	194	0	16.2251	6.39429	1.39e-06	1.65e-05	Up	NA	NA	NA	NA	NA	NA	Unknown protein
Cla97C08G148500	978	0	109.902	9.15549	2.41e-14	7.43e-13	Up	K10523 SPOP; speckle-type POZ protein	NA	GO:0003674;GO:0005488;GO:0005515;GO:0019899;GO:0031625;GO:0044389;	GO:0006508;GO:0006511;GO:0006807;GO:0008150;GO:0008152;GO:0009056;GO:0009057;GO:0009987;GO:0010498;GO:0019222;GO:0019538;GO:0019941;GO:0030162;GO:0030163;GO:0043161;GO:0043170;GO:0043632;GO:0044237;GO:0044238;GO:0044248;GO:0044257;GO:0044260;GO:0044265;GO:0044267;GO:0050789;GO:0051171;GO:0051246;GO:0051603;GO:0060255;GO:0065007;GO:0071704;GO:0080090;GO:1901564;GO:1901565;GO:1901575;	GO:0000151;GO:0005575;GO:0005622;GO:0005623;GO:0005737;GO:0019005;GO:0031461;GO:0031463;GO:0032991;GO:0044424;GO:0044464;GO:1902494;GO:1990234;	BTB POZ domain-containing protein	BTB/POZ domain-containing protein
Cla97C09G168920	333	0	4.13272	4.42141	0.00783601	0.0335265	Up	NA	NA	NA	NA	NA	NA	Unknown protein
Cla97C10G187970	249	0	6.68356	5.11461	0.000658843	0.00409843	Up	NA	NA	NA	NA	NA	NA	Retrotransposable element Tf2
Cla97C10G187980	213	0	5.68762	4.88393	0.00170359	0.00929674	Up	NA	NA	NA	NA	NA	NA	Unknown protein
Cla97C10G188240	1011	0	5.07786	4.71903	0.00279195	0.0141508	Up	K15803 GERD; (-)-germacrene D synthase [EC:4.2.3.75]	ko00909:Sesquiterpenoid and triterpenoid biosynthesis	NA	NA	NA	(-)-germacrene D synthase-like	(-)-germacrene D synthase-like
Cla97C11G216460	480	0	5.38654	4.80467	0.00216516	0.0113847	Up	K09422 MYBP; transcription factor MYB, plant	NA	NA	NA	NA	Transcription factor	transcription factor MYB90-like
Cla97C11G217460	1596	0	7.29619	5.24209	0.000360974	0.00242081	Up	K00487 CYP73A; trans-cinnamate 4-monooxygenase [EC:1.14.14.91]	ko00130:Ubiquinone and other terpenoid-quinone biosynthesis|ko00940:Phenylpropanoid biosynthesis|ko00941:Flavonoid biosynthesis|ko00945:Stilbenoid, diarylheptanoid and gingerol biosynthesis	NA	NA	NA	Belongs to the cytochrome P450 family	cytochrome P450 CYP73A100-like
