# Supplementary material
Source: Research Square preprint supplement (doi:10.21203/rs.3.rs-10078689/v1)
Supplement: Supplementary file 3 [file 7cf8f5398c2512637a99e1fa.xlsx]

## Sheet: Sheet1
Index	Compounds	物质	Class I	物质一级分类	Class II	物质二级分类	Formula	Level	score	CAS	E1	E2	E3	F1	F2	F3	VIP	P-value	FDR	Fold_Change	Log2FC	Type
MEDL00392	1-(9Z-octadecenoyl)-sn-glycero-3-phosphocholine	1-(9Z-十八烯酰基)-sn-glycero-3-phosphocholine	Lipids	脂质	LPC	溶血磷脂酰胆碱	C26H52NO7P	2	0.9238	19420-56-5	35559.1	64606.6	51639.7	962246	1198198	444276	1.37579	0.0666088	0.173583	17.1583	4.10083	up
MW0053722	Glycerol trihexanoate	Glycerol trihexanoate	GL	甘油脂类	TG	甘油三酯	C21H38O6	2	0.9113	621-70-5	117222	172905	121889	62155.4	68437.5	66691.4	1.33743	0.0553782	0.152003	0.478828	-1.06242	down
MW0104838	2-Phenylglycine	2-苯甘氨酸	Amino acids and derivatives	氨基酸及其衍生物	Amino acids and derivatives	氨基酸及其衍生物	C8H9NO2	2	0.9057	2835-06-5	11039	13302.5	15697.8	5583.07	3360.64	6007.33	1.30967	0.0101473	0.0505965	0.373408	-1.42117	down
MW0113755	6-Methyl-5-hepten-2-one	6-甲基-5-庚烯-2-酮	Others	其它类	Ketone compounds	酮类化合物	C8H14O	2	0.8824	110-93-0	8751.4	4064.66	9288.73	18934.2	23301.2	18831.2	1.26199	0.0044376	0.0316671	2.7626	1.46603	up
MEDN0851	Indolepyruvate	吲哚-3-丙酮酸	Organic acids	有机酸	Organic acids	有机酸	C11H9NO3	2	0.8603	392-12-1	3534.82	2902.4	5521.07	5471.51	7468.61	19167.8	1.02008	0.254339	0.420045	2.685	1.42492	up
MW0132606	3',4'-Dimethoxyflavone	3',4'-二甲氧基黄酮	Flavonoids	黄酮	Flavones	黄酮	C17H14O4	2	0.8268	4143-62-8	5310.55	6959.3	4007.6	18767.3	13536	30672.8	1.30077	0.087847	0.209916	3.86892	1.95193	up
MW0159262	Val-Gln	缬氨酸-谷氨酰胺	Amino acids and derivatives	氨基酸及其衍生物	Amino acids and derivatives	氨基酸及其衍生物	C10H19N3O4	2	0.7952	42854-54-6	79945.4	78656.3	77229	31279.7	35687	35408.9	1.41	8.24246e-05	0.00426559	0.434107	-1.20388	down
MW0123588	Dhurrin	蜀黍苷	Alkaloids	生物碱	Phenolamine	酚胺	C14H17NO7	2	0.7829	499-20-7	95308.7	166150	86712.6	282060	171179	257815	1.16531	0.0494247	0.140902	2.04226	1.03016	up
MW0109339	Pro-Tyr	脯氨酸-酪氨酸	Amino acids and derivatives	氨基酸及其衍生物	Amino acids and derivatives	氨基酸及其衍生物	C14H18N2O4	2	0.782	19786-36-8	5617.29	7906.88	8729.1	21775.7	19481.7	19447.6	1.36781	0.000534589	0.0108962	2.72791	1.4478	up
MW0104300	1-Phenyl-1-propanone	1-苯基丙酮	Others	其它类	Ketone compounds	酮类化合物	C9H10O	2	0.7799	93-55-0	15803.6	16038.8	16714.3	61025.4	63001.2	64793	1.41686	0.000268418	0.00755521	3.88864	1.95927	up
MW0108617	2-Acetamido-3-methylbutanoic acid	N-乙酰基-DL-缬氨酸	Amino acids and derivatives	氨基酸及其衍生物	Amino acids and derivatives	氨基酸及其衍生物	C7H13NO3	2	0.7746	3067-19-4	663748	698257	702113	201213	191784	205211	1.41649	0.000200908	0.00651656	0.289813	-1.78681	down
MW0130752	Murrangatin	8-(1，2-二羟基-3-甲基丁-3-烯-1-基)-7-甲氧基-2H-苯并吡喃-2-酮	Others	其它类	Ketone compounds	酮类化合物	C15H16O5	2	0.7683	88546-96-7 | 37126-91-3	109952	116542	91256.6	26460.4	50027	75860.6	1.12334	0.0411102	0.124152	0.479458	-1.06052	down
MW0125866	N'-nitrosonornicotine	N-亚硝基降烟碱	Heterocyclic compounds	杂环化合物	Heterocyclic compounds	杂环化合物	C9H11N3O	2	0.7678	16543-55-8	47.15	474.29	295.13	10567.1	11537.1	11807.7	1.34049	0.00042224	0.00982709	41.5297	5.37607	up
MW0012772	Glyceryl arachidonate	1-花生四烯酸甘油酯	GL	甘油脂类	MG	单甘油酯	C23H38O4	2	0.7629	35474-99-8	11197.7	8495.44	9314.92	20780	15105.6	23969.7	1.29491	0.047787	0.13791	2.0634	1.04502	up
MW0056883	Colfosceril palmitate	菊苣棕榈酸酯	GP	甘油磷脂类	PC	磷脂酰胆碱	C40H80NO8P	2	0.7588	63-89-8	3.98423e+06	2.23047e+06	1.32597e+06	347851	215068	89375.4	1.31208	0.0973718	0.224667	0.0865035	-3.5311	down
MW0055118	Monomethyl glutaric acid	单甲基戊二酸	Organic acids	有机酸	Organic acids	有机酸	C6H10O4	2	0.7524	1501-27-5	11194.7	14243.1	13841.1	57834.2	56714	54943.3	1.40989	5.17128e-06	0.00144509	4.31507	2.10938	up
MW0111729	4-Hydroxy-3-(3-methyl-2-butenyl)acetophenone	3-异戊二烯基-4-羟基苯乙酮	Others	其它类	Ketone compounds	酮类化合物	C13H16O2	2	0.7484	26932-05-8	84643.7	62292.9	87600.4	31741.6	30210.9	30562.6	1.37929	0.0269773	0.0940013	0.394458	-1.34206	down
MEDL00416	3-Hydroxydodecanoic acid	3-羟基十二烷酸	Organic acids	有机酸	Organic acids	有机酸	C12H24O3	2	0.7484	1883-13-2	3122.04	3106.71	2396.91	1184.62	305.99	351.87	1.26534	0.00410109	0.0303358	0.213605	-2.22699	down
MW0005951	Acetyleugenol	乙酸丁香酚酯	Phenolic acids	酚酸类	Phenolic acids	酚酸类	C12H14O3	2	0.7466	93-28-7	7453.11	7534.7	9308.42	1633.79	3575.05	5120.4	1.14887	0.0244719	0.0885454	0.425138	-1.234	down
MW0157885	Thr-Glu	苏氨酸-谷氨酸	Amino acids and derivatives	氨基酸及其衍生物	Amino acids and derivatives	氨基酸及其衍生物	C9H16N2O6	2	0.7465	54532-73-9	119759	107929	124990	210560	252890	260820	1.38393	0.00981447	0.0497876	2.05364	1.03818	up
MW0114753	Lobeline	山梗菜碱	Alkaloids	生物碱	Piperidine alkaloids	哌啶类生物碱	C22H27NO2	2	0.7464	90-69-7	4631.02	2766.36	1876.51	25719.9	27991.9	34642.3	1.37921	0.00628393	0.0389125	9.52718	3.25205	up
MEDL00684	FAA(18:1)	顺式十油酸	Lipids	脂质	Free fatty acids	游离脂肪酸	C18H34O2	2	0.7439	506-17-2	17398.5	21722.2	21412.8	81184.9	77685.3	74212.4	1.40879	4.95221e-05	0.00353838	3.85047	1.94504	up
MW0104285	2-amino-3-(1-methyl-1H-imidazol-4-yl)propanoic acid	2-氨基-3-(1-甲基-1H-咪唑-4-基)丙酸	Organic acids	有机酸	Organic acids	有机酸	C7H11N3O2	2	0.742	28095-60-5	1.27388e+06	1.07213e+06	2.22991e+06	732127	839533	667446	1.16667	0.158498	0.310222	0.489324	-1.03114	down
MW0103346	2'-Deoxyguanosine-5'-diphosphate	2'-脱氧鸟苷-5'-二磷酸	Nucleotides and derivatives	核苷酸及其衍生物	Nucleotides and derivatives	核苷酸及其衍生物	C10H15N5O10P2	2	0.7414	3493-09-2	45368.9	23737	33305	15519.8	14029.2	9013.25	1.25882	0.0654765	0.171457	0.376545	-1.40911	down
MW0000126	(-)-Anabasine	八角枫碱	Alkaloids	生物碱	Alkaloids	生物碱	C10H14N2	2	0.7414	494-52-0	16647.7	18175.6	14348.8	37117	39151.5	36460.9	1.39712	0.000185792	0.00632471	2.29255	1.19695	up
MW0113161	Musk ketone	4'-叔丁基-2'，6'-二甲基-3'，5'-二硝基苯乙酮	Others	其它类	Ketone compounds	酮类化合物	C14H18N2O5	2	0.7398	81-14-1	4313.08	7266.72	3927.36	13045.5	13377.9	10982.4	1.29801	0.00657805	0.0398606	2.41216	1.27033	up
MEDP1830	Ethyl p-methoxycinnamate	对甲氧基肉桂酸乙酯	Phenolic acids	酚酸类	Phenolic acids	酚酸类	C12H14O3	2	0.7295	24393-56-4	4776.17	4997.55	2858.75	7548.31	9935.21	11188.4	1.26282	0.0189405	0.0753198	2.2697	1.1825	up
MEDL00096	2-Methylglutaric acid	2-甲基戊二酸	Organic acids	有机酸	Organic acids	有机酸	C6H10O4	2	0.7284	617-62-9	49050.9	66992.8	55355.3	12509.3	15263	15297.5	1.3992	0.012737	0.0584445	0.251284	-1.99261	down
MW0125855	N-Methylphthalimide	N-甲基邻苯二甲酰亚胺	Alcohol and amines	醇、胺类	Amines	胺类	C9H7NO2	2	0.726	550-44-7	140623	156040	151965	66914.4	65673.2	72309.8	1.40944	0.000834972	0.0135386	0.45672	-1.13062	down
MEDN1876	Vanylglycol	3-甲氧基-4-羟基苯乙二醇	Benzene and substituted derivatives	苯及其衍生物	Benzene and substituted derivatives	苯及其衍生物	C9H12O4	2	0.7243	534-82-7	493812	559944	539623	211358	234440	233172	1.40806	0.00152974	0.0182191	0.426119	-1.23067	down
MW0052411	Dimethyl succinate	丁二酸二甲酯	Others	其它类	Ketone compounds	酮类化合物	C6H10O4	2	0.7179	106-65-0	71061.6	88415.4	83573.7	197202	221365	158025	1.36665	0.020141	0.0784549	2.37231	1.24629	up
MW0168897	Ergocalciferol	维生素D2；麦角钙化醇	Others	其它类	Vitamin	维生素	C28H44O	2	0.7153	50-14-6	13153.1	28360.4	17837.5	45986.9	40498.4	46449.3	1.25116	0.0195071	0.0768233	2.2398	1.16337	up
MEDL00443	Gly-His	甘氨酸-组氨酸	Amino acids and derivatives	氨基酸及其衍生物	Amino acids and derivatives	氨基酸及其衍生物	C8H12N4O3	2	0.7084	2489-13-6	64852.5	72580.6	174201	32643.2	34109.3	38635.6	1.19252	0.189996	0.347108	0.338179	-1.56414	down
MEDP1775	Lipoamide	硫辛酰胺	Alcohol and amines	醇、胺类	Amines	胺类	C8H15NOS2	2	0.7006	940-69-2	27856.1	23740	33017.3	10249.4	7559.3	9144.6	1.38252	0.0134223	0.0606053	0.318547	-1.65042	down
MW0011161	Anemarsaponin E	知母皂苷E	Terpenoids	萜类	Terpene	萜类	C46H78O19	3	0.9928	244779-38-2	32418	38004	30187.4	89260.4	89893.7	94027.7	1.40421	0.000102358	0.0045602	2.71527	1.4411	up
MEDL01818	Brassinin	芸苔宁	Alkaloids	生物碱	Plumerane	吲哚类生物碱	C11H12N2S2	3	0.9883	105748-59-2	372513	520231	815841	166569	254657	201651	1.2524	0.103807	0.232422	0.364557	-1.45578	down
MEDP0453	Indole	吲哚	Alkaloids	生物碱	Plumerane	吲哚类生物碱	C8H7N	3	0.969	120-72-9	57659	37686.1	66527.4	124304	124723	134389	1.32161	0.00670098	0.0400458	2.36863	1.24405	up
MW0015599	Agavoside B	龙舌兰苷B	Steroids	甾体	Steroidal saponins	甾体皂苷	C39H62O14	3	0.9666	56857-66-0	151962	167885	176869	333098	375124	433807	1.38642	0.0137565	0.0615162	2.29916	1.20111	up
MW0110474	Vulgaxanthin II	仙人掌黄质 II	Amino acids and derivatives	氨基酸及其衍生物	Amino acids and derivatives	氨基酸及其衍生物	C14H16N2O8	3	0.9601	1047-87-6	380712	308046	273095	158978	147300	139156	1.36703	0.028956	0.0987785	0.463101	-1.1106	down
MEDP1448	1-Stearoyl-sn-glycerol	MG(18:0/0:0/0:0)	GL	甘油脂类	MG	单甘油酯	C21H42O4	3	0.9587	22610-61-3	1.84571e+06	857491	476422	116478	539461	212665	1.06185	0.192399	0.350413	0.273178	-1.87209	down
MW0007384	Iophendylate	碘芬酯	Benzene and substituted derivatives	苯及其衍生物	Benzene and substituted derivatives	苯及其衍生物	C19H29IO2	3	0.9557	99-79-6	8776.64	4739.62	7249.47	45832.9	57507.9	55736.3	1.39305	0.00323201	0.0272618	7.66056	2.93745	up
MEDN0551	3-Indoleacrylic acid	3-吲哚丙烯酸	Alkaloids	生物碱	Plumerane	吲哚类生物碱	C11H9NO2	3	0.9523	29953-71-7	2.46708e+06	2.79381e+06	2.70678e+06	7.06162e+06	7.0393e+06	7.29486e+06	1.41333	5.28636e-06	0.00144509	2.68533	1.4251	up
MEDP0178	Uracil	尿嘧啶	Nucleotides and derivatives	核苷酸及其衍生物	Nucleotides and derivatives	核苷酸及其衍生物	C4H4N2O2	3	0.9519	66-22-8	180912	185949	179655	59832.5	105211	60378.8	1.31358	0.0178591	0.0728483	0.412471	-1.27764	down
MEDL01799	Isoscutellarein	异野黄芩素	Flavonoids	黄酮	Flavones	黄酮	C15H10O6	3	0.9501	41440-05-5	100.77	85.96	29.66	84.18	4278.16	5905.2	1.03128	0.193036	0.351349	47.4492	5.56831	up
MEDN0153	Adenosine monophosphate	腺苷-5'-单磷酸	Nucleotides and derivatives	核苷酸及其衍生物	Nucleotides and derivatives	核苷酸及其衍生物	C10H14N5O7P	3	0.9494	61-19-8	355886	393865	377273	138012	126018	129849	1.41379	0.000852785	0.0136723	0.349486	-1.51669	down
MEDN0068	S-(5-Adenosy)-L-Homocysteine	S-(5-腺苷)-L-高半胱氨酸	Amino acids and derivatives	氨基酸及其衍生物	Amino acids and derivatives	氨基酸及其衍生物	C14H20N6O5S	3	0.9485	979-92-0	103362	108642	105160	52694.9	49543.2	53936.7	1.41304	1.54471e-05	0.00224386	0.492411	-1.02206	down
MEDP0071	Glycyl-L-leucine	N-甘氨酰-L-亮氨酸	Amino acids and derivatives	氨基酸及其衍生物	Amino acids and derivatives	氨基酸及其衍生物	C8H16N2O3	3	0.9476	869-19-2	10391.3	4802.57	13942	2810.92	2354.85	4789.16	1.13814	0.129448	0.269249	0.341673	-1.54931	down
MW0137771	Cyanidin 3-(3''-malonyl-glucoside)	Cyanidin 3-(3''-丙二酰-葡萄糖苷)	Flavonoids	黄酮	Anthocyanidins	花青素	C24H23O14+	3	0.9462	171828-61-8	88.68	178.54	260.87	1976.05	378.52	1022.78	1.18235	0.175943	0.331685	6.39541	2.67704	up
MW0148248	Deltonin	三角叶薯蓣皂苷	Steroids	甾体	Steroidal saponins	甾体皂苷	C45H72O17	3	0.9453	55659-75-1	26994.5	36223.3	43082.6	74513	94808.5	82571	1.33807	0.00354413	0.0280664	2.36963	1.24466	up
MEDN0562	Indole-3-carbinol	吲哚-3-甲醇	Alkaloids	生物碱	Plumerane	吲哚类生物碱	C9H9NO	3	0.9445	700-06-1	11988.7	12734.8	12838.3	34532.1	35789.4	37073.1	1.41547	0.000278366	0.00773477	2.85914	1.51558	up
MEDP0276	Indole-3-carboxaldehyde	吲哚-3-甲醛	Alkaloids	生物碱	Plumerane	吲哚类生物碱	C9H7NO	3	0.9316	487-89-8	247878	285597	275364	688691	719252	719094	1.41169	9.29757e-06	0.00176455	2.62974	1.39492	up
MEDN0163	Hypoxanthine	次黄嘌呤	Nucleotides and derivatives	核苷酸及其衍生物	Nucleotides and derivatives	核苷酸及其衍生物	C5H4N4O	3	0.9174	68-94-0	22903.4	21952.1	22292.8	6896.41	7202.74	2503.83	1.28756	0.00656693	0.0398304	0.247258	-2.01591	down
MW0015654	All-trans-heptaprenyl diphosphate	全反式庚二烯二磷酸	Organic acids	有机酸	Organic acids	有机酸	C35H60O7P2	3	0.9108	76078-18-7	124360	108396	112881	267704	272184	253058	1.40915	4.9198e-05	0.00353838	2.29416	1.19797	up
MW0114716	[(2R,3R,4R,5R,6R)-4-[(2S,3R,4R,5R,6S)-4,5-dihydroxy-6-methyl-3-[(2S,3R,4S,5S)-3,4,5-trihydroxyoxan-2-yl]oxyoxan-2-yl]oxy-6-[2-(3,4-dihydroxyphenyl)ethoxy]-5-hydroxy-2-(hydroxymethyl)oxan-3-yl] (E)-3-(4-hydroxy-3-methoxyphenyl)prop-2-enoate	[(2R,3R,4R,5R,6R)-4-[(2S,3R,4R,5R,6S)-4,5-二羟基-6-甲基-3-[(2S,3R,4S,5S) -3,4,5-trihydroxyoxan-2-yl]oxyoxan-2-yl]oxy-6-[2-(3,4-dihydroxyphenyl)ethoxy]-5-hydroxy-2-(hydroxymethyl)oxan-3-yl ] (E)-3-(4-hydroxy-3-methoxyphenyl)prop-2-enoate	Benzene and substituted derivatives	苯及其衍生物	Benzene and substituted derivatives	苯及其衍生物	C35H46O19	3	0.894	140147-66-6	1130.16	1697	650.66	3632.87	1546.47	4882.38	1.075	0.143306	0.289192	2.89311	1.53262	up
MEDL02174	n-Oleoylethanolamine	油酰单乙醇胺	Alkaloids	生物碱	Alkaloids	生物碱	C20H39NO2	3	0.8822	111-58-0	18126.2	17037.5	21959.5	144238	132465	138520	1.41311	0.000128423	0.0052516	7.26891	2.86174	up
MEDP1776	L-Leucyl-L-alanine	L-亮氨酸-L-丙氨酸	Amino acids and derivatives	氨基酸及其衍生物	Amino acids and derivatives	氨基酸及其衍生物	C9H18N2O3	3	0.8801	7298-84-2	15665.3	14594.9	20138.9	9886.62	6124.63	7816.4	1.295	0.0167349	0.069572	0.47278	-1.08076	down
MEDL00388	Cathinone	卡西酮;阿拉伯茶酮	Alkaloids	生物碱	Alkaloids	生物碱	C9H11NO	3	0.8788	71031-15-7	28393.3	35904.1	32954.3	83789.3	90225.2	95193.7	1.40149	0.000316589	0.00841681	2.76816	1.46893	up
MEDP1315	Quinoline	喹啉	Alkaloids	生物碱	Quinoline alkaloids	喹啉类生物碱	C9H7N	3	0.8741	91-22-5	51658	53818.7	56913.4	185839	228689	198616	1.41055	0.00645915	0.0394451	3.77575	1.91676	up
MW0005990	Aloin	芦荟苷 B	Quinones	醌类	Anthraquinone	蒽醌	C21H22O9	3	0.8724	28371-16-6 | 8015-61-0 | 5133-19-7	326051	161575	218687	119867	122348	107613	1.20181	0.131415	0.272381	0.495287	-1.01366	down
MW0015757	Amitenone	阿米替尼酮	Others	其它类	Ketone compounds	酮类化合物	C53H72O8	3	0.8346	21682-47-3	1934.56	1906.26	1141.17	7773.9	5275.77	2966.71	1.22291	0.113165	0.246024	3.21486	1.68475	up
MEDP0461	2-Methylguanosine	2-甲基鸟苷	Nucleotides and derivatives	核苷酸及其衍生物	Nucleotides and derivatives	核苷酸及其衍生物	C11H15N5O5	3	0.8293	2140-77-4	6139.76	12462.3	8996.06	24489.2	28630.1	28820.5	1.32726	0.00183573	0.0198601	2.96904	1.56999	up
MW0108661	3-(2-Acetamidoethyl)-1H-indol-5-yl hydrogen sulfate	3-(2-乙酰氨基乙基)-1H-吲哚-5-基硫酸氢盐	Tryptamines,Cholines,Pigments	色胺、胆碱、色素	Tryptamines	色胺	C12H14N2O5S	3	0.8293	94840-68-3	56723.8	77875.8	56490	353505	376970	400483	1.40674	0.000245672	0.00715211	5.91847	2.56522	up
MEDP0636	2-Furancarboxaldehyde	糠醛	Others	其它类	Aldehyde compounds	醛类化合物	C5H4O2	3	0.8088	98-01-1	46203.5	108982	38158.1	22315.9	22950.3	22522	1.16759	0.202491	0.3619	0.350609	-1.51206	down
MEDL02488	Quercetin	槲皮素	Flavonoids	黄酮	Flavonols	黄酮醇	C15H10O7	3	0.8058	117-39-5	45.38	30.7	46.83	0.57	7.31	7.3	1.17586	0.0102217	0.0507725	0.123505	-3.01736	down
MW0013089	2',3'-Anhydrolutein	2',3'-Anhydrolutein	Alcohol and amines	醇、胺类	Alcohols	醇类	C40H54O	3	0.8055	92760-19-5	32048	114962	142164	26173	21470	11142.2	1.15025	0.143915	0.290241	0.203287	-2.29841	down
mws1068	Kaempferol	山柰酚	Flavonoids	黄酮	Flavonols	黄酮醇	C15H10O6	3	0.7895	520-18-3	1159.3	929.52	1003.89	539.82	166.87	282.53	1.2409	0.0094182	0.0487099	0.319855	-1.64451	down
MEDP0560	Dihydrouracil	5,6-二氢尿嘧啶	Nucleotides and derivatives	核苷酸及其衍生物	Nucleotides and derivatives	核苷酸及其衍生物	C4H6N2O2	3	0.7875	504-07-4	4159.49	5160.72	1411.74	12087.5	13853.5	8176.38	1.17369	0.0233153	0.0858901	3.17905	1.66859	up
MEDP0525	N-Acetyl-L-alanine	N-乙酰基-L-丙氨酸	Amino acids and derivatives	氨基酸及其衍生物	Amino acids and derivatives	氨基酸及其衍生物	C5H9NO3	3	0.7856	97-69-8	5713.92	49700.9	53536.5	134110	138963	118062	1.06021	0.0149436	0.0651044	3.59	1.84399	up
MEDL01821	3-Furoic acid	3-糠酸	Organic acids	有机酸	Organic acids	有机酸	C5H4O3	3	0.7816	488-93-7	7740.26	7960.89	7873.59	133912	136583	133934	1.41774	4.47896e-05	0.00350869	17.1552	4.10057	up
MEDN0056	N-Acetylleucine	N-乙酰基亮氨酸	Amino acids and derivatives	氨基酸及其衍生物	Amino acids and derivatives	氨基酸及其衍生物	C8H15NO3	3	0.7796	1188-21-2	85492.4	88846.1	91662.5	22416.7	22325.5	24410.9	1.41588	0.000171012	0.0061432	0.259973	-1.94357	down
MEDP0587	N-Alpha-acetyllysine	N-α-乙酰赖氨酸	Amino acids and derivatives	氨基酸及其衍生物	Amino acids and derivatives	氨基酸及其衍生物	C8H16N2O3	3	0.7781	152473-69-3	4786.84	10672.8	6552.52	20361.9	21647	20932.1	1.30556	0.0129622	0.0589824	2.85938	1.5157	up
MEDN0722	Orcinol	3-羟基-5-甲基苯酚	Phenolic acids	酚酸类	Phenolic acids	酚酸类	C7H8O2	3	0.778	504-15-4	40843.6	41459.3	39527.9	167824	193044	179492	1.41548	0.00258468	0.0243756	4.43533	2.14904	up
MEDL02197	7-O-Methylluteolin	羟基芫花素	Flavonoids	黄酮	Flavones	黄酮	C16H12O6	3	0.7702	20243-59-8	137337	262438	240196	84024.6	82882.6	94834.2	1.27696	0.0806737	0.197794	0.408989	-1.28986	down
MW0128061	2-Hydroxy-3-phenyl-2-propenal	（2Z)-2-羟基-3-苯基丙-2-烯醇	Others	其它类	Aldehyde compounds	醛类化合物	C9H8O2	3	0.768	82140-91-8	11150.6	11268.9	10514	28722.1	30926.4	30530.2	1.41508	0.000423191	0.00982709	2.73821	1.45323	up
MEDP0083	4-Hydroxyproline	反-4-羟基-L-脯氨酸	Amino acids and derivatives	氨基酸及其衍生物	Amino acids and derivatives	氨基酸及其衍生物	C5H9NO3	3	0.7675	51-35-4	53484.4	48849.3	47036.4	113668	115367	116224	1.41187	0.000195936	0.00646689	2.31143	1.20879	up
MW0106937	Glu-Ala	谷氨酸-丙氨酸	Amino acids and derivatives	氨基酸及其衍生物	Amino acids and derivatives	氨基酸及其衍生物	C8H14N2O5	3	0.7665	21064-18-6	82128.9	81930	78252.4	160434	160264	166422	1.41547	2.23052e-05	0.00255827	2.01031	1.00742	up
MW0108268	Methylacetoacetic acid	乙酰乙酸甲酯	Others	其它类	Lactones	内酯类化合物	C5H8O3	3	0.7628	105-45-3	58203.6	59719.7	50976.7	24636.5	25739.2	23205.2	1.40419	0.00457805	0.03218	0.435648	-1.19877	down
MEDN1317	3,3-Dimethylglutaric acid	3,3-二甲基戊二酸	Organic acids	有机酸	Organic acids	有机酸	C7H12O4	3	0.7615	4839-46-7	65113.4	69616.7	69803.4	13489.6	15945.1	8549.4	1.38491	7.00314e-05	0.00401875	0.185711	-2.42887	down
MEDP1604	3-Indoleacetonitrile	3-吲哚乙腈	Alkaloids	生物碱	Plumerane	吲哚类生物碱	C10H8N2	3	0.7604	771-51-7	5021.07	2784.06	3071.58	10566.7	15762.7	14450.1	1.34796	0.0124069	0.0574979	3.74924	1.9066	up
MW0114721	Lepidimoic acid	鳞甲酸	Organic acids	有机酸	Organic acids	有机酸	C12H18O10	3	0.7498	157676-09-0	31098.6	34674.9	35034	15055.9	16267.9	15949.8	1.40806	0.00282027	0.0256109	0.468949	-1.0925	down
MEDL02671	Sudachiin B	{6-[4-(5,7-二羟基-6,8-二甲氧基-4-氧代苯并吡喃-2-基)-2-甲氧基苯氧基]-3,4,5-三羟基恶烷-2-基}甲基-4-甲酰氧基-3-羟基-3-甲基丁酸酯	Flavonoids	黄酮	Flavones	黄酮	C30H34O17	3	0.7481	98891-96-4	3553.32	2331.93	2402.51	5050.61	7025.78	5130.51	1.2839	0.024428	0.0884361	2.07618	1.05393	up
MW0111068	Isothipendyl	异噻吩基	Heterocyclic compounds	杂环化合物	Heterocyclic compounds	杂环化合物	C16H19N3S	3	0.748	482-15-5	420.32	369.64	394.15	1842.91	773.06	563.24	1.09051	0.235163	0.399319	2.68489	1.42487	up
MEDL02755	5,7-Dimethoxyflavone	5,7-二甲氧基黄酮	Flavonoids	黄酮	Flavones	黄酮	C17H14O4	3	0.743	110241-33-3	205156	211378	228718	456338	484078	528693	1.40574	0.00291808	0.0260866	2.2768	1.18701	up
MW0117984	2,5-Dimethyl-1,4-dithiane-2,5-diol	2,5-二甲基-1,4-二噻烷-2,5-二醇	Alcohol and amines	醇、胺类	Alcohols	醇类	C6H12O2S2	3	0.742	55704-78-4	8366.29	4151.39	6493.23	11122.9	16280	16531.8	1.23585	0.0222785	0.0838281	2.31102	1.20853	up
MEDN0061	Phenylacetylglycine	N-苯乙酰甘氨酸	Amino acids and derivatives	氨基酸及其衍生物	Amino acids and derivatives	氨基酸及其衍生物	C10H11NO3	3	0.742	500-98-1	685.14	1768.15	2204.39	4846.39	3819.65	7456.31	1.20378	0.0555016	0.152005	3.46146	1.79138	up
MW0127750	5-Hydroxy-4-methoxy-6-(2-phenylethyl)-5,6-dihydro-2H-pyran-2-one	5-Hydroxy-4-methoxy-6-(2-phenylethyl)-5,6-dihydro-2H-pyran-2-one	Others	其它类	Ketone compounds	酮类化合物	C14H16O4	3	0.7413	52247-81-1	8917.47	9200.74	13004.3	32585.8	32113.7	32966.6	1.38759	0.00269282	0.0249115	3.13812	1.6499	up
MW0114195	D-erythro-D-galacto-Octitol	D-赤型-D-半乳糖-辛醇	Alcohol and amines	醇、胺类	Alcohols	醇类	C8H18O8	3	0.7396	27655-86-3	260	414.39	219.81	81.96	31.76	28.14	1.31526	0.0424884	0.127016	0.158645	-2.65613	down
FDATN00564	Nordihydroguaiaretic acid	去甲二氢愈创木酸	Benzene and substituted derivatives	苯及其衍生物	Benzene and substituted derivatives	苯及其衍生物	C18H22O4	3	0.7372	500-38-9 | 27686-84-6	6390.46	5046.96	8167.06	2365.5	2687.64	1392.41	1.30114	0.0257988	0.0915633	0.328779	-1.60481	down
MW0123757	Dorzolamide	多佐胺	Alcohol and amines	醇、胺类	Amines	胺类	C10H16N2O4S3	3	0.7365	120279-96-1	17095.5	14022.8	18439.4	7433.33	4718.84	9864.69	1.24733	0.0101302	0.0505965	0.444267	-1.1705	down
MEDP0437	Ergothioneine	麦角硫因	Alkaloids	生物碱	Alkaloids	生物碱	C9H15N3O2S	3	0.7345	497-30-3	189621	155593	222227	294152	398870	451611	1.28273	0.038165	0.118267	2.01719	1.01234	up
MEDP1879	Phe-ala	L-苯丙氨酸基-L-丙氨酸	Amino acids and derivatives	氨基酸及其衍生物	Amino acids and derivatives	氨基酸及其衍生物	C12H16N2O3	3	0.7344	3918-87-4	7655.59	14280.8	7244.62	19926.7	26168.3	20191.1	1.24513	0.0159354	0.0675878	2.27155	1.18368	up
MEDL02675	Anaxagoreine	1-甲氧基-5,6,6a,7-四氢-4h-二苯并[de,g]喹啉-2,7-二醇	Alkaloids	生物碱	Aporphine alkaloids	阿朴啡型生物碱	C17H17NO3	3	0.7336	77410-38-9	913.31	1695.71	1785.28	3454.01	9934.85	9365.76	1.26255	0.09553	0.222072	5.17821	2.37245	up
MW0017109	Cincassiol B	肉桂醇B	Terpenoids	萜类	Ditepenoids	二萜	C20H32O8	3	0.7327	73599-13-0	18983	26950.4	14518.9	64800.4	45198.8	25816.9	1.08973	0.145404	0.292609	2.24666	1.16778	up
MEDP2077	1-Phenylbiguanide	1-苯乙双胍	Benzene and substituted derivatives	苯及其衍生物	Benzene and substituted derivatives	苯及其衍生物	C8H11N5	3	0.7278	102-02-3	25091.5	23920.1	28820.7	11055.6	10098.4	11942.9	1.39716	0.00496149	0.0337091	0.425233	-1.23367	down
MEDP1589	Theonylleucine	异亮氨酸-色氨酸	Amino acids and derivatives	氨基酸及其衍生物	Amino acids and derivatives	氨基酸及其衍生物	C10H20N2O4	3	0.7269	50299-12-2	7513.53	8045.28	6749.66	2011.1	880.08	2386.23	1.31217	0.000757916	0.0128843	0.236565	-2.07969	down
MEDP0598	2'-Hydroxy-5'-methylacetophenone	2'-羟基-5'-甲基苯乙酮	Benzene and substituted derivatives	苯及其衍生物	Benzene and substituted derivatives	苯及其衍生物	C9H10O2	3	0.7241	1450-72-2	134706	135461	140304	54822.7	59942.7	58687.6	1.4144	5.33407e-06	0.00144509	0.42257	-1.24274	down
MEDP0065	N-Acetyl-L-glutamic acid	N-乙酰-L-谷氨酸	Amino acids and derivatives	氨基酸及其衍生物	Amino acids and derivatives	氨基酸及其衍生物	C7H11NO5	3	0.7147	1188-37-0	11254.4	7519.23	12226.3	24000.8	20740.6	19897.9	1.30405	0.00439878	0.0315335	2.08514	1.06015	up
MEDP0002	D-Homocysteine	D-高半胱氨酸	Amino acids and derivatives	氨基酸及其衍生物	Amino acids and derivatives	氨基酸及其衍生物	C4H9NO2S	3	0.7138	6027-14-1 | 454-28-4	1802.34	1001.83	1243.21	326.73	1014.53	161.39	1.05174	0.0745884	0.187465	0.371265	-1.42948	down
MW0124712	Lotusine	牛角花素	Alkaloids	生物碱	Isoquinoline alkaloids	异喹啉类生物碱	C19H24NO3+	3	0.7128	6871-67-6	3302.92	3592.97	4646.35	13324.8	10759	8945.68	1.36004	0.0217023	0.0821981	2.86162	1.51683	up
MEDL01817	Quercetagetin	槲皮万寿菊素	Flavonoids	黄酮	Flavonols	黄酮醇	C15H10O8	3	0.7125	90-18-6	9387.36	4234.45	7786.51	19627.2	16705	15942.1	1.25409	0.00703841	0.0411544	2.44178	1.28793	up
MW0011263	Anhydrolutein-I	(3R,6'R)-3-Hydroxy-3',4'-didehydro-beta,gamma-carotene	Others	其它类	Hydrocarbon derivatives	烃衍生物	C40H54O	3	0.7117	92760-20-8	50110.2	52745	122470	20241.7	14565.2	7207.09	1.26732	0.119779	0.255215	0.18646	-2.42306	down
MW0153300	Madecassic acid	2,3,6,23-四羟基熊果-12-烯-28-酸 (羟基积雪草酸)	Terpenoids	萜类	Triterpene	三萜	C30H48O6	3	0.7073	18449-41-7	70216.8	46030.8	27295.3	165647	127885	120747	1.25987	0.00870877	0.0465326	2.8861	1.52912	up
MEDL02624	Piperlonguminine	荜茇明宁碱	Alkaloids	生物碱	Alkaloids	生物碱	C16H19NO3	3	0.707	5950-12-9	816665	836651	873052	372106	375904	383614	1.41581	0.000841331	0.0135404	0.447925	-1.15867	down
MW0001678	1-nitrosonaphthalene	1-硝基萘	Benzene and substituted derivatives	苯及其衍生物	Benzene and substituted derivatives	苯及其衍生物	C10H7NO	3	0.7045	21711-65-9	31.94	1446.35	129.33	4737.61	5154.62	4439.68	1.17125	0.00451377	0.0318689	8.91499	3.15623	up
MEDL02627	Melilotocarpan D	左旋白香草木犀紫檀酚 D	Phenolic acids	酚酸类	Phenolic acids	酚酸类	C17H16O6	3	0.7041	83013-81-4	6496.7	6853.96	2015.24	110.53	696.24	959.11	1.18234	0.0968927	0.223879	0.114922	-3.12127	down
MEDL02668	1-Hydroxy-3,7-dimethoxyxanthone	1-羟基-3,7-二甲氧基氧杂蒽酮	Flavonoids	黄酮	Other Flavonoids	其它类黄酮	C15H12O5	3	0.704	13379-35-6	89873.9	103905	92949.4	178477	191491	216137	1.39043	0.00603076	0.0378717	2.04411	1.03147	up
MW0134606	5'-Methoxybilobetin	5′-甲氧基银杏内酯	Flavonoids	黄酮	Flavones	黄酮	C32H22O11	3	0.7006	77053-35-1	12659.3	13366.1	14536.9	1418.9	7454.48	2320.32	1.19231	0.0272035	0.0945362	0.275963	-1.85745	down
MEDP0058	L-Saccharopine	L-酵母氨酸	Amino acids and derivatives	氨基酸及其衍生物	Amino acids and derivatives	氨基酸及其衍生物	C11H20N2O6	3	0.6988	997-68-2	3364.04	5731.23	4776.48	14758	13886.5	13120.8	1.36354	0.00069364	0.0124932	3.01081	1.59015	up
MW0139091	Caffeoylferuloylspermidine	N1-咖啡酰-N10-阿魏酰亚精胺	Heterocyclic compounds	杂环化合物	Heterocyclic compounds	杂环化合物	C26H33N3O6	3	0.6979	114916-07-3	2918.55	2226.55	10198.3	960.63	1409.64	612.57	1.1498	0.246848	0.412146	0.194405	-2.36286	down
MW0112046	2-Acetyl-3-ethylpyrazine	2-乙酰基-3-乙基吡嗪	Alkaloids	生物碱	Alkaloids	生物碱	C8H10N2O	3	0.6971	32974-92-8	20950.3	23203.3	35328.8	88323	85674.1	83917.8	1.36961	0.00329425	0.0275665	3.24493	1.69819	up
MEDL01829	Isothankunic acid	异参枯尼酸	Terpenoids	萜类	Triterpene	三萜	C30H48O6	3	0.6969	22882-19-5	1078.84	2094.92	1757.34	6353.36	4122.28	9562.98	1.29043	0.0810447	0.198431	4.06372	2.0228	up
MEDL01930	Bis-ferulamidobutane	N,N'-二阿魏酰腐胺	Alkaloids	生物碱	Phenolamine	酚胺	C24H28N2O6	3	0.6953	42369-86-8	49105.8	55889.4	40986.3	16567	17119.3	20323.2	1.38399	0.0141725	0.0628577	0.369975	-1.4345	down
MEDP0442	Choline Alfoscerate	甘磷酸胆碱 GPC	Lipids	脂质	PC	磷脂酰胆碱	C8H20NO6P	3	0.6935	28319-77-9	8703.43	4152.85	8923.83	37305.2	36644.9	34580.2	1.3568	0.000458471	0.0101802	4.983	2.31701	up
MEDL00643	Phenylacetylglutamine	苯乙酰-L-谷氨酰胺	Amino acids and derivatives	氨基酸及其衍生物	Amino acids and derivatives	氨基酸及其衍生物	C13H16N2O4	3	0.6909	28047-15-6	169459	137902	188444	64244.1	79379.9	86862.8	1.34465	0.0145875	0.0642165	0.464874	-1.10509	down
MEDP1138	1-Methylhistamine	1-甲基组胺	Alkaloids	生物碱	Alkaloids	生物碱	C6H11N3	3	0.6892	501-75-7	14181.6	17719.9	18010.2	2735.2	5636.47	7053.48	1.28003	0.00290371	0.0260866	0.309048	-1.6941	down
MEDN0128	Vanillin	香草醛; 4-羟基-3-甲氧基苯甲醛	Phenolic acids	酚酸类	Phenolic acids	酚酸类	C8H8O3	3	0.6873	121-33-5	236704	223073	238427	106210	119340	117816	1.40773	5.97384e-05	0.0039633	0.491785	-1.0239	down
MEDP1799	Quinaldic acid	2-喹啉羧酸	Organic acids	有机酸	Organic acids	有机酸	C10H7NO2	3	0.6868	93-10-7	593448	570601	582409	375573	87951.8	58556.2	1.14408	0.0556952	0.15222	0.298937	-1.74209	down
MEDN1328	Hydroxyisocaproic acid	羟基异己酸	Organic acids	有机酸	Organic acids	有机酸	C6H12O3	3	0.6853	13748-90-8	21327.3	20071.6	27675.1	60326.1	51402	50038.5	1.36958	0.00214499	0.0218944	2.34193	1.2277	up
MEDN1534	D-Tagatose	D-塔格糖	Others	其它类	Saccharides	糖类	C6H12O6	3	0.6837	41847-61-4	41258.5	43361.5	45920.4	95825.5	94427.7	94430.6	1.41316	0.000200232	0.00651656	2.18081	1.12486	up
MW0116583	1,2,5-Trimethylpyrrole	1,2,5-三甲基吡咯	Heterocyclic compounds	杂环化合物	Heterocyclic compounds	杂环化合物	C7H11N	3	0.6831	930-87-0	382.28	51.11	234.79	2614.15	2426.77	2046.74	1.28774	0.00117445	0.0158758	10.6074	3.407	up
MEDN0819	3-Hydroxymandelic acid	3-羟基扁桃酸	Organic acids	有机酸	Organic acids	有机酸	C8H8O4	3	0.6808	17119-15-2	69105.5	72518.2	24025	17741	16761.8	16176.1	1.17545	0.133596	0.275496	0.305942	-1.70867	down
MEDP1102	Carnitine C10:0	癸酰基左旋肉碱	FA	脂肪酰类	CAR	酰基肉碱	C17H33NO4	3	0.6806	1492-27-9	50116.8	52422.9	48521.2	101801	104890	119652	1.40371	0.00688433	0.04054	2.16034	1.11126	up
MEDP0611	N-Acetylhistidine	N-乙酰-L-组氨酸	Amino acids and derivatives	氨基酸及其衍生物	Amino acids and derivatives	氨基酸及其衍生物	C8H11N3O3	3	0.6786	2497-02-1	29417.6	71913.7	75842.5	130371	125124	160699	1.17162	0.0149977	0.0652098	2.34907	1.23209	up
MW0052355	Digoxin	地高辛	Steroids	甾体	Steroid	甾体	C41H64O14	3	0.6751	20830-75-5	16311.7	20148.5	8172.17	64665.2	65668.1	65677.4	1.3375	0.00456131	0.0321318	4.39166	2.13477	up
MEDN0743	2-Nonanone	2-壬酮	Others	其它类	Ketone compounds	酮类化合物	C9H18O	3	0.6746	821-55-6	58972.4	42439.2	57067.7	96813.3	143757	77263.2	1.20398	0.106296	0.236124	2.00552	1.00398	up
MEDP0457	5-Aminolevulinic acid	5-氨基酮戊酸	Alkaloids	生物碱	Alkaloids	生物碱	C5H9NO3	3	0.6707	106-60-5	38589.6	41346.4	43441.7	84428.1	90905.4	88626.9	1.40972	6.97275e-05	0.00401875	2.13945	1.09724	up
MW0125753	Neoacrimarine E	新吖啶 E	Alcohol and amines	醇、胺类	Amines	胺类	C35H35NO9	3	0.6685	104188-25-2	419.35	1912.44	1586.88	7860.78	7466.26	5979.82	1.25869	0.00168654	0.0192047	5.43727	2.44288	up
MW0103675	Thymidine-5'-phosphate	胸苷-5'-磷酸	Nucleotides and derivatives	核苷酸及其衍生物	Nucleotides and derivatives	核苷酸及其衍生物	C10H15N2O8P	3	0.6683	365-07-1	22180.4	24329.1	16606.5	3442.66	7394.83	8255.05	1.27967	0.00903728	0.0475243	0.302499	-1.725	down
MW0157888	Thr-His	L-苏氨酰-L-组氨酸	Amino acids and derivatives	氨基酸及其衍生物	Amino acids and derivatives	氨基酸及其衍生物	C10H16N4O4	3	0.6683	55831-93-1	3436.08	6902.36	2034.89	11054.7	8320.79	7450.17	1.08427	0.0607934	0.162332	2.16802	1.11638	up
MEDN1016	Aminohippuric acid	氨基马尿酸	Amino acids and derivatives	氨基酸及其衍生物	Amino acids and derivatives	氨基酸及其衍生物	C9H10N2O3	3	0.6669	61-78-9	3.494e+06	3.81142e+06	3.7209e+06	1.20518e+06	1.14834e+06	1.14114e+06	1.41573	0.000919078	0.0140608	0.316937	-1.65773	down
MW0000121	Alkaloid RC	生物碱RC	Alkaloids	生物碱	Alkaloids	生物碱	C26H29NO11	3	0.6666	17948-36-6	220.42	388.97	392.11	750.8	1386.93	716.58	1.24076	0.0969509	0.223934	2.85003	1.51098	up
MEDL01730	Methotrexate	甲氨蝶呤	Nucleotides and derivatives	核苷酸及其衍生物	Nucleotides and derivatives	核苷酸及其衍生物	C20H22N8O5	3	0.6654	59-05-2	2109.4	2467.92	1228.7	6073.96	2639.12	3462.89	1.05435	0.167028	0.320737	2.09713	1.06842	up
MW0014221	C18 Sulfatide	C18 硫苷	SL	鞘脂类	Cer	神经酰胺	C42H81NO11S	3	0.6644	244215-65-4	68024.1	70661.5	61887.1	5020.72	3891.3	7046.67	1.40457	0.000613829	0.0119138	0.0795656	-3.65171	down
MEDP0298	Aminocaproic acid	6-氨基己酸	Organic acids	有机酸	Organic acids	有机酸	C6H13NO2	3	0.6573	60-32-2	1825.05	2491.81	3592.03	16161.8	19637.1	19009	1.38797	0.00115663	0.0157331	6.9299	2.79284	up
MW0053955	Hovenidulcioside B2	Hovenidulcioside B2	Others	其它类	Lactones	内酯类化合物	C38H60O12	3	0.6563	174902-17-1	3430.93	6792.78	9045.85	34790.4	77999.1	30211.3	1.30957	0.111886	0.244039	7.42107	2.89163	up
MEDL02258	Nordihydrocapsaicin	去甲二氢辣椒素	Alkaloids	生物碱	Phenolamine	酚胺	C17H27NO3	3	0.6507	28789-35-7	17891.6	21837.4	17703.4	67336.8	67799.5	39746.6	1.33913	0.0491478	0.140342	3.04502	1.60645	up
MEDN0403	Urocanic acid	尿刊酸	Organic acids	有机酸	Organic acids	有机酸	C6H6N2O2	3	0.6481	3465-72-3	34055.8	37979.2	35367.3	94053.2	94766.9	85655.9	1.41116	0.00086658	0.0137079	2.55559	1.35366	up
MW0137646	Cyanidin 3-glucoside	矢车菊素-3-O-葡萄糖苷	Flavonoids	黄酮	Anthocyanidins	花青素	C21H21ClO11	3	0.6467	7084-24-4 | 27214-71-7	14753.1	23575.2	7190.39	7389.3	4946.26	5026.27	1.08056	0.182888	0.339584	0.381421	-1.39054	down
MW0000003	Cinchonan-3,9-diol, 6'-methoxy-, (8alpha,9R)-	（-)-(3S)-3-羟基奎宁	Alkaloids	生物碱	Alkaloids	生物碱	C20H24N2O3	3	0.6452	78549-61-8	30657.9	31302.5	31495.8	153337	148279	157740	1.41732	0.000454389	0.0101802	4.9152	2.29725	up
MEDL00434	Turanose	松二糖	Others	其它类	Saccharides	糖类	C12H22O11	3	0.6439	547-25-1	4463.27	8198.25	5216.26	12305.2	18083.5	10856	1.2354	0.0519598	0.145685	2.30704	1.20604	up
MW0105387	7-Hydroxyoctanoic acid	7-羟基辛酸	Organic acids	有机酸	Organic acids	有机酸	C8H16O3	3	0.6439	17173-14-7	7162.06	11585.4	3854.48	25012.2	24015.2	13529	1.16413	0.0469536	0.13623	2.76775	1.46871	up
MEDL01940	Feruloylputrescine	阿魏酰腐胺	Alkaloids	生物碱	Phenolamine	酚胺	C14H20N2O3	3	0.6437	501-13-3 | 91000-11-2	5328.43	2480.76	2525.17	8855.83	8631.26	10447.5	1.27373	0.0101332	0.0505965	2.70308	1.4346	up
MEDP1660	Bis(2-ethylhexyl) adipate	己二酸二(2-乙基己基)酯	Others	其它类	Lactones	内酯类化合物	C22H42O4	3	0.6436	103-23-1	3051.51	3140.35	6497.25	487.61	2041.83	1780.48	1.06713	0.118107	0.253192	0.339655	-1.55786	down
MEDP1796	Perillyl alcohol	紫苏子醇	Terpenoids	萜类	Monoterpenoids	倍萜	C10H16O	3	0.6413	536-59-4	303881	344761	353429	725094	847947	872713	1.39847	0.00485235	0.0332805	2.4407	1.2873	up
MW0113919	Alpha-Tetrasaccharide	α-四糖	Others	其它类	Saccharides	糖类	C26H45NO20	3	0.6409	59957-92-5	125136	123310	118960	15529.4	19478.9	20995.6	1.4111	2.14679e-06	0.00139584	0.152431	-2.71377	down
MEDL01937	2,3-Butanediol	2,3-丁二醇	Others	其它类	Alcohol compounds	醇类化合物	C4H10O2	3	0.6365	513-85-9	58994.3	56249.2	57757.7	165029	165165	160335	1.41706	1.25456e-05	0.00203915	2.8354	1.50355	up
MW0010966	(24R)-5b,8b-Epidioxyergosta-6,22E-dien-3b-ol 3-glucoside	(24R)-5b,8b-Epidioxyergosta-6,22E-dien-3b-ol 3-glucoside	Terpenoids	萜类	Terpene	萜类	C34H54O8	3	0.6335	348144-81-0	102431	105065	47277.8	46957	26065.8	20837	1.15272	0.0881581	0.210427	0.368404	-1.44064	down
MEDN0854	Methylglutaric acid	3-甲基戊二酸	Organic acids	有机酸	Organic acids	有机酸	C6H10O4	3	0.6333	626-51-7	536342	567019	562689	146165	151497	155547	1.41675	0.00023269	0.00694013	0.272026	-1.87818	down
MW0114702	Lacto-N-tetraose	乳糖-N-四糖	Others	其它类	Saccharides	糖类	C26H45NO21	3	0.6296	14116-68-8	13774.4	16152.9	18326.6	35256.2	40107.8	41275.1	1.38568	0.000896095	0.0138381	2.41719	1.27333	up
MW0133045	7H-Furo(3,2-g)(1)benzopyran-7-one, 2,3-dihydro-3-hydroxy-2-(1-hydroxy-1-methylethyl)-	3-羟基-2-(2-羟基丙烷-2-基)-2H，3H，7H-呋喃并[3，2-g]苯并吡喃-7-酮	Others	其它类	Ketone compounds	酮类化合物	C14H14O5	3	0.6292	51580-96-2	1049.8	707.43	1411.06	2998.07	3370.69	3171.67	1.33562	0.00253901	0.0241708	3.01122	1.59035	up
MW0127884	2'-Hydroxy-4'-Methoxychalcone	（2E)-1-(2-羟基-4-甲氧基苯基)-3-苯基丙-2-烯-1-酮	Others	其它类	Ketone compounds	酮类化合物	C16H14O3	3	0.6289	39273-61-5 | 52923-29-2	1888.5	1846.92	1912.46	29500.1	25007.2	29410.4	1.41654	0.00321079	0.0272618	14.8583	3.89319	up
MEDP0359	Curcumin	姜黄素	Phenolic acids	酚酸类	Phenolic acids	酚酸类	C21H20O6	3	0.6282	458-37-7	76.96	414.48	724.65	942.47	1574.07	1974.97	1.06487	0.0466486	0.135527	3.6934	1.88495	up
MEDN1015	Nicotinic acid	烟酸 (维生素 B3)	Others	其它类	Vitamin	维生素	C6H5NO2	3	0.6269	59-67-6	106209	120938	85964.1	245213	229829	203639	1.36166	0.00173059	0.0194459	2.16754	1.11606	up
MEDTN00621	gamma-Glutamylglutamine	γ-L-谷氨酸-L-谷氨酰胺	Amino acids and derivatives	氨基酸及其衍生物	Amino acids and derivatives	氨基酸及其衍生物	C10H17N3O6	3	0.6259	10148-81-9	7262.04	4357.84	7907.76	15101.3	15061.9	13109	1.28579	0.00642318	0.0392883	2.21595	1.14792	up
MW0139288	Peonidin 3-arabinoside	芍药色素-3-阿拉伯糖苷	Flavonoids	黄酮	Anthocyanidins	花青素	C21H21ClO10	3	0.6257	524943-91-7	4267.95	3679.19	6638.22	835.25	444.35	1966.66	1.23561	0.0343841	0.110512	0.22257	-2.16767	down
MW0139880	Tricin 7-diglucuronoside	苜蓿素-7-O-二葡萄糖醛酸苷	Flavonoids	黄酮	Flavones	黄酮	C29H30O19	3	0.6194	83097-44-3	20856.9	12090.3	14119	29300.8	37393.4	30380.5	1.27812	0.0105091	0.0517259	2.06251	1.0444	up
MW0054460	Lutein	叶黄素	Others	其它类	Vitamin	维生素	C40H56O2	3	0.6192	127-40-2	20846.2	31173.4	52833.1	11014.6	12287.5	2631.97	1.13867	0.0965175	0.223532	0.247338	-2.01545	down
MW0112824	3-Hydroxy-2-(4-methylbenzoyl)-4H-1-benzopyran-4-one	3-Hydroxy-2-(4-methylbenzoyl)-4H-1-benzopyran-4-one	Benzene and substituted derivatives	苯及其衍生物	Benzene and substituted derivatives	苯及其衍生物	C17H12O4	3	0.6185	173866-78-9	7215.36	5821.93	9275.15	1888.7	4448.45	4682.18	1.08182	0.0494987	0.141	0.493865	-1.01781	down
MEDP1764	Harmaline	骆驼蓬灵	Alkaloids	生物碱	Plumerane	吲哚类生物碱	C13H14N2O	3	0.6172	304-21-2	21179.5	97673.2	85427	337124	332033	297439	1.23586	0.00239839	0.0233799	4.73172	2.24237	up
MW0150774	Hexacarboxylporphyrin I	六羧基卟啉I	Organic acids	有机酸	Organic acids	有机酸	C38H38N4O12	3	0.6162	73913-56-1	31956.1	26278	21490.9	11465.9	11037.6	10958.6	1.3686	0.0360718	0.114036	0.41972	-1.2525	down
MW0006985	Eprosartan	依普罗沙坦	Benzene and substituted derivatives	苯及其衍生物	Benzene and substituted derivatives	苯及其衍生物	C23H24N2O4S	3	0.6146	133040-01-4	3545.46	4848.3	2084.16	29461.2	30629.5	8671.18	1.24948	0.110724	0.242483	6.56255	2.71426	up
MW0138593	Kaempferol 3-(2'',3''-diacetyl-4''-p-coumaroylrhamnoside)	山奈酚 3-(2'',3''-diacetyl-4''-p-香豆酰鼠李糖苷)	Flavonoids	黄酮	Flavones	黄酮	C34H30O14	3	0.6142	128941-61-7	733.97	4492.55	2622.74	4147.05	8718.44	11886	1.02521	0.1126	0.245186	3.15335	1.65689	up
MW0106579	Edetic acid	乙二胺四乙酸	Organic acids	有机酸	Organic acids	有机酸	C10H16N2O8	3	0.611	62-33-9	71031.5	74405.5	50169.5	49570.4	19291.9	17689.6	1.12391	0.0524455	0.146541	0.44248	-1.17632	down
MW0123195	Calabaxanthone	卡拉巴蒽醌	Flavonoids	黄酮	Other Flavonoids	其它类黄酮	C24H24O5	3	0.6101	39011-96-6	1157.88	425.54	285.49	1803.95	1581.36	1892.38	1.16698	0.0406597	0.123595	2.82394	1.49771	up
MEDP1613	Val-val	缬氨酸-缬氨酸	Amino acids and derivatives	氨基酸及其衍生物	Amino acids and derivatives	氨基酸及其衍生物	C10H20N2O3	3	0.6085	3918-94-3	124547	154157	111942	313584	303866	320728	1.386	0.0017523	0.0194924	2.40161	1.264	up
MW0055103	Momordin Ie	莫尔丁	Terpenoids	萜类	Triterpene Saponin	三萜皂苷	C46H72O17	3	0.6068	96158-13-3	7746.18	4723.96	3122.93	15742.2	13945.9	11435.3	1.2474	0.0100601	0.0504967	2.63728	1.39905	up
MEDN1507	3-Methylpentanoic acid	3-甲基戊酸	Organic acids	有机酸	Organic acids	有机酸	C6H12O2	3	0.6029	105-43-1	747.02	376.89	951.48	8157.43	7912.11	7679.74	1.38413	7.0122e-06	0.00157871	11.4433	3.51643	up
MW0108636	N-Acetyl-L-citrulline	乙酰瓜氨酸	Amino acids and derivatives	氨基酸及其衍生物	Amino acids and derivatives	氨基酸及其衍生物	C8H15N3O4	3	0.6026	33965-42-3	38540.1	32442.1	39295.4	8005.92	2544.26	19212.9	1.14524	0.018803	0.0749128	0.269892	-1.88954	down
MEDP0053	L-Dopa	L-多巴	Amino acids and derivatives	氨基酸及其衍生物	Amino acids and derivatives	氨基酸及其衍生物	C9H11NO4	3	0.602	59-92-7	6161.47	5828.27	6055.99	430.02	2027.26	2946.4	1.10884	0.0273271	0.0948643	0.299444	-1.73964	down
MEDP0894	3-Methoxytyramine	3-甲氧基酪胺	Phenolic acids	酚酸类	Phenolic acids	酚酸类	C9H13NO2	3	0.599	554-52-9	48069	43732.7	50279.5	93773.8	99453.6	101929	1.40571	0.000109397	0.00474199	2.07738	1.05476	up
MW0011570	(Methylthio)acetic acid	（甲硫基）乙酸	Organic acids	有机酸	Organic acids	有机酸	C3H6O2S	3	0.5971	2444-37-3	122514	171547	138033	62340	71168.7	71093.9	1.36105	0.0303606	0.102058	0.473514	-1.07852	down
MEDP0812	5-Methyl-2-furancarboxaldehyde	5-甲基糠醛	Others	其它类	Aldehyde compounds	醛类化合物	C6H6O2	3	0.5963	620-02-0	262409	322801	364239	142253	171150	157858	1.35205	0.025576	0.0909711	0.496351	-1.01057	down
MW0010475	2,3-Dehydrosilybin	2,3-脱氢水飞蓟宾	Lignans and Coumarins	木脂素和香豆素	Lignans	木脂素	C25H20O10	3	0.592	25166-14-7	21980.4	61657.6	54639.3	9325.69	9931.03	3878.02	1.26755	0.0848064	0.204909	0.167307	-2.57943	down
MEDL02206	Anatabine	新烟草碱	Alkaloids	生物碱	Pyridine alkaloids	吡啶类生物碱	C10H12N2	3	0.5916	581-49-7	1400.52	2240.81	2398.25	942.54	589.21	645.23	1.29922	0.0410127	0.12403	0.360452	-1.47212	down
MW0000925	Bis(2-methylpropanoyloxy)-9,10-epoxy-p-mentha-1,3,5-triene	双（2-甲基丙酰氧基）-9,10-epoxy-p-mentha-1,3,5-triene	Phenolic acids	酚酸类	Phenolic acids	酚酸类	C18H24O5	3	0.5779	22518-06-5	2075.69	2896.82	2632.84	1013.71	545.06	126	1.16559	0.00505006	0.0340739	0.221524	-2.17446	down
MW0109152	Phe-arg	苯丙氨酰精氨酸	Amino acids and derivatives	氨基酸及其衍生物	Amino acids and derivatives	氨基酸及其衍生物	C15H23N5O3	3	0.5736	1238-09-1	23667.4	29772	37420.3	67392.6	72940	89494.4	1.34421	0.0072588	0.0418411	2.52947	1.33883	up
MW0118912	2-Thiophenethiol	2-噻吩硫醇	Heterocyclic compounds	杂环化合物	Heterocyclic compounds	杂环化合物	C4H4S2	3	0.5705	7774-74-5	20.86	2.38	2.37	54.83	125.82	50.95	1.22429	0.0980769	0.225414	9.04334	3.17686	up
MW0127431	Di-1-propenyl sulfide	二-1-丙烯硫醚	Others	其它类	Others	其它	C6H10S	3	0.5657	33922-80-4	94.5	74.91	128.96	2373.87	2689.32	2273.34	1.41036	0.00249921	0.0239382	24.5887	4.61992	up
MW0114223	D-glucosamine 6-phosphate	D-氨基葡萄糖-6-磷酸	Others	其它类	Saccharides	糖类	C6H14NO8P	3	0.5641	6815-93-6	54.72	174.16	6289.47	9669.06	11078.8	11717.7	1.07333	0.0430145	0.128176	4.98063	2.31633	up
MW0168881	Quinaprilat	喹那普利拉	Organic acids	有机酸	Organic acids	有机酸	C23H26N2O5	3	0.5636	82768-85-2	4530.22	16183	10031.2	1523.83	4072.4	3869.88	1.07563	0.163556	0.316407	0.307896	-1.69948	down
MEDN1402	3,4-Dihydroxyhydrocinnamic acid	二氢咖啡酸	Phenolic acids	酚酸类	Phenolic acids	酚酸类	C9H10O4	3	0.5613	1078-61-1	14288.5	20120.5	16278.2	6626.95	6918.82	8525.16	1.35599	0.0213765	0.0813283	0.435435	-1.19947	down
MEDP0295	4-Acetamidobutanoic acid	4-乙酰氨基丁酸	Organic acids	有机酸	Organic acids	有机酸	C6H11NO3	3	0.5573	3025-96-5	255.6	605.73	600.93	2073.78	1147.28	1843.02	1.2536	0.0350135	0.111652	3.46319	1.7921	up
MW0013349	27-Nor-5b-cholestane-3a,7a,12a,24,25-pentol	27-Nor-5b-cholestane-3a,7a,12a,24,25-pentol	Alcohol and amines	醇、胺类	Alcohols	醇类	C26H46O5	3	0.5539	78648-95-0	65338.3	70257.5	66672.1	245313	157704	162169	1.36269	0.0508828	0.143591	2.79424	1.48246	up
MW0128022	(S)-2-Hydrazino-3-(4-hydroxy-3-methoxyphenyl)-2-methylpropionic acid	（2S)-2-肼基-3-(4-羟基-3-甲氧基苯基)-2-甲基丙酸	Organic acids	有机酸	Organic acids	有机酸	C11H16N2O4	3	0.553	84488-77-7	3105.62	2945.72	2672.27	1726.46	1702.97	896.5	1.21838	0.0189908	0.0754297	0.495888	-1.01191	down
MEDL02549	Imperatorin	欧前胡素	Lignans and Coumarins	木脂素和香豆素	Coumarins	香豆素	C16H14O4	3	0.5448	482-44-0	472283	573291	617562	211996	238218	137853	1.33879	0.00356852	0.0280788	0.353589	-1.49985	down
MEDN0050	L-Theanine	茶氨酸	Amino acids and derivatives	氨基酸及其衍生物	Amino acids and derivatives	氨基酸及其衍生物	C7H14N2O3	3	0.5444	3081-61-6	93185.4	100659	100835	220002	209907	217809	1.4137	1.07601e-05	0.00189086	2.19804	1.13622	up
MEDP1080	Glycyltryptophan	甘氨酰-色氨酸	Amino acids and derivatives	氨基酸及其衍生物	Amino acids and derivatives	氨基酸及其衍生物	C13H15N3O3	3	0.5406	2390-74-1	2346.12	293.23	675.3	228.8	53.4	59.74	1.15594	0.255961	0.421125	0.10316	-3.27704	down
MW0119095	3-(6-Amino-9h-purin-9-yl)propanoic acid	3-(6-Amino-9h-purin-9-yl)丙酸	Organic acids	有机酸	Organic acids	有机酸	C8H9N5O2	3	0.5394	4244-47-7	4558.64	8955.36	7108.76	22569.8	15998.1	22766	1.31048	0.0112764	0.0539114	2.97409	1.57245	up
MEDL02593	Demethylnobiletin	去甲基川陈皮素	Flavonoids	黄酮	Flavones	黄酮	C20H20O8	3	0.5238	2174-59-6	3991.29	4247.32	3535.09	448.67	1377.61	43.64	1.11055	0.00492637	0.033611	0.158822	-2.65452	down
MW0105254	4-Mercapto-5-methyl-3(2H)-thiophenone	4-巯基-5-甲基-3(2H)-噻吩酮	Others	其它类	Ketone compounds	酮类化合物	C5H6OS2	3	0.5178	26486-09-9	455.4	592.55	572.22	8553.1	8501.6	8675.54	1.41521	4.75886e-08	0.000276831	15.8812	3.98925	up
MEDN0498	D-Ribulose 5-phosphate	核酮糖-5-磷酸	Others	其它类	Saccharides	糖类	C5H11O8P	3	0.5172	4151-19-3	201.72	257.28	289.45	30729.4	30555.8	30742.6	1.41636	1.05241e-07	0.000276831	122.958	6.94202	up
MW0107572	1-(2-Amino-3-methylpentanoyl)pyrrolidine-2-carboxylic acid	异亮氨酸脯氨酸	Organic acids	有机酸	Organic acids	有机酸	C11H20N2O3	2	0.8719	-	42961.4	38630.9	40403.1	18442.3	17789.3	13184.1	1.37772	0.000454971	0.0101802	0.405061	-1.30379	down
MW0012817	1-Hexadecyl-sn-glycerol 3-phosphate	1-十六烷基溶血磷脂酸	GP	甘油磷脂类	LPA	溶血磷脂酸	C19H41O6P	2	0.8393	-	10871.3	21831.7	9391.51	42646.6	35483.9	33424.4	1.25817	0.0110487	0.0533718	2.6501	1.40605	up
MW0108562	Phenylbutyrylglutamine	苯基丁酰谷氨酰胺	Alcohol and amines	醇、胺类	Amines	胺类	C15H20N2O4	2	0.8042	-	846178	918796	943884	2.49873e+06	2.40566e+06	2.56328e+06	1.4138	3.3037e-05	0.00315037	2.75676	1.46297	up
MW0116901	1-Benzylimidazole	1-苯并咪唑	Benzene and substituted derivatives	苯及其衍生物	Benzene and substituted derivatives	苯及其衍生物	C10H10N2	2	0.7862	-	67259.4	81323.1	78052.9	189656	193656	196351	1.40688	0.000217926	0.00685836	2.55769	1.35484	up
MW0009501	p-Phenetidine	对苯吡啶	Phenolic acids	酚酸类	Phenolic acids	酚酸类	C8H11NO	2	0.7778	-	90435.3	96686.5	95631.6	25045.1	25278	24536.8	1.41698	0.000677219	0.012468	0.264754	-1.91728	down
MW0012973	1-Palmitoyl-2-oleoyl-sn-glycero-3-phosphate	1-棕榈酰基-2-油酰基-sn-甘油-3-磷酸	GP	甘油磷脂类	PA	磷脂酸	C37H71O8P	2	0.7729	-	41098.8	49211.8	10709.1	3288.21	10965.1	815.6	1.10078	0.12656	0.265193	0.149168	-2.74499	down
MW0117760	2,2'-Dipyridylamine	2,2'-联吡啶胺	Alkaloids	生物碱	Pyridine alkaloids	吡啶类生物碱	C10H9N3	2	0.7712	-	42661.9	42158.3	19938.9	104036	115894	94746.5	1.29445	0.00224873	0.0224596	3.00382	1.5868	up
MW0061712	PI(18:0/20:4(5Z,8Z,11Z,14Z))	PI(18:0/20:4(8Z,11Z,14Z,17Z))	GP	甘油磷脂类	PI	磷脂酰肌醇	C47H83O13P	2	0.7379	-	64579.7	70709.8	57271.5	243581	115938	143926	1.26785	0.114498	0.247743	2.61447	1.38652	up
MW0105125	3-Oxopentanoic acid	3-氧戊酸	Organic acids	有机酸	Organic acids	有机酸	C5H8O3	2	0.7363	-	22668.6	22257.4	22496.8	12332.8	8149.8	11568.4	1.34283	0.0111668	0.0537032	0.475373	-1.07287	down
MW0001603	1-Hydroxy-2-naphthoic acid	1-羟基-2-萘甲酸; 1-羟基-2-萘甲酸; 1-萘酚-2-羧酸	Organic acids	有机酸	Organic acids	有机酸	C11H8O3	2	0.7344	-	18163.1	18578.9	18775.3	50778.3	44587.8	45794.3	1.41231	0.004098	0.0303358	2.54264	1.34633	up
MW0012843	1-Tetracosanoyl-sn-glycero-3-phosphocholine	1-Lignoceroyl-2-hydroxy-sn-glycero-3-phosphocholine	Lipids	脂质	LPC	溶血磷脂酰胆碱	C32H66NO7P	2	0.7276	-	66146.8	68045.4	64501.6	207577	209793	222552	1.41631	0.000621591	0.0119583	3.22064	1.68735	up
MW0011898	1,2-Dioctanoyl-sn-glycerol	1,2-Dioctanoyl-sn-glycerol	GL	甘油脂类	DG	甘油二酯	C19H36O5	2	0.7075	-	85.74	73.62	74.92	60.75	26.97	21.68	1.14234	0.0654672	0.171457	0.466963	-1.09862	down
MEDTP02401	Cyclocreatine	环癸胺	Nucleotides and derivatives	核苷酸及其衍生物	Nucleotides and derivatives	核苷酸及其衍生物	C5H9N3O2	2	0.7049	-	6684.86	5400.27	11082.9	23537.3	19655.6	19781.2	1.30499	0.00449709	0.0318173	2.71814	1.44262	up
MW0114089	cis-Ferulic acid [arabinosyl-(1->3)-[glucosyl-(1->6)]-glucosyl] ester	顺式-阿魏酸[阿拉伯糖基-(1->3)-[葡糖基-(1->6)]-葡糖基]酯	Organic acids	有机酸	Organic acids	有机酸	C27H38O18	3	0.9929	-	39205.8	40142.2	41187.8	123842	116363	128738	1.41529	0.00150547	0.0181606	3.06086	1.61394	up
MW0051287	[(2S)-2-[9-(3,4-dimethyl-5-propylfuran-2-yl)nonanoyloxy]-3-hydroxypropyl] 9-(3,4-dimethyl-5-propylfuran-2-yl)nonanoate	[(2S)-2-[9-(3,4-dimethyl-5-propylfuran-2-yl)nonanoyloxy]-3-hydroxypropyl] 9-(3,4-dimethyl-5-propylfuran-2-yl)nonanoate	GL	甘油脂类	DG	甘油二酯	C39H64O7	3	0.9921	-	12686.5	1840.05	10005.6	61095.3	65530.1	59206.9	1.25402	0.000532225	0.0108962	7.57505	2.92126	up
MW0102835	(1R,2S,4S,6R,7S,8R,9S,12S,13R,18S,19S)-6-methoxy-7,9,13-trimethyl-6-[(3S)-3-methyl-4-[(2R,3R,4S,5S,6R)-3,4,5-trihydroxy-6-(hydroxymethyl)oxan-2-yl]oxybutyl]-19-[(2R,3R,4S,5S,6R)-3,4,5-trihydroxy-6-methyloxan-2-yl]oxy-5-oxapentacyclo[10.8.0.02,9.04,8.013,18]icosan-16-one	(1R,2S,4S,6R,7S,8R,9S,12S,13R,18S,19S)-6-methoxy-7,9,13-trimethyl-6-[(3S)-3-methyl-4-[(2R,3R,4S,5S,6R)-3,4,5-trihydroxy-6-(hydroxymethyl)oxan-2-yl]oxybutyl]-19-[(2R,3R,4S,5S,6R)-3,4,5-trihydroxy-6-methyloxan-2-yl]oxy-5-oxapentacyclo[10.8.0.02,9.04,8.013,18]icosan-16-one	Benzene and substituted derivatives	苯及其衍生物	Benzene and substituted derivatives	苯及其衍生物	C40H66O14	3	0.9917	-	49745.4	48181.3	41283.2	156619	175124	165568	1.41036	0.000335209	0.00858081	3.57239	1.83689	up
MW0055682	PA(18:0/22:6(4Z,7Z,10Z,13Z,16Z,19Z))	PA(18:0/22:6(4Z,7Z,10Z,13Z,16Z,19Z))	GP	甘油磷脂类	PA	磷脂酸	C43H73O8P	3	0.9774	-	96281.2	62014.4	48429.9	240274	298156	246980	1.35478	0.001459	0.0178581	3.79929	1.92573	up
MW0021617	CL(8:0/10:0/10:0/11:0)	CL(8:0/10:0/10:0/11:0)	GL	甘油脂类	CL	双磷酸甘油酯	C48H92O17P2	3	0.9762	-	6565.26	5560.25	7439.9	17717.7	15231.7	12584.2	1.3546	0.0184036	0.0742618	2.32725	1.21863	up
MW0061236	PG(20:4(5Z,8Z,11Z,14Z)/22:6(4Z,7Z,10Z,13Z,16Z,19Z))	PG(20:4(5Z,8Z,11Z,14Z)/22:6(4Z,7Z,10Z,13Z,16Z,19Z))	GP	甘油磷脂类	PG	磷脂酰甘油	C48H75O10P	3	0.9652	-	67253.4	65605.5	32419.3	8316.93	3195.94	7827.32	1.33442	0.0477568	0.137906	0.117016	-3.09522	down
MW0001405	1,9-Pyrazoloanthrone	1,9-吡唑蒽酮	Benzene and substituted derivatives	苯及其衍生物	Benzene and substituted derivatives	苯及其衍生物	C14H8N2O	3	0.9602	-	76216.2	106201	126513	11139.3	23486.8	37020.4	1.27356	0.0172796	0.0711989	0.231918	-2.10832	down
MW0061511	Pgp(22:5(4Z,7Z,10Z,13Z,16Z)/22:5(4Z,7Z,10Z,13Z,16Z))	PGP(22:5(4Z,7Z,10Z,13Z,16Z)/22:5(4Z,7Z,10Z,13Z,16Z))	GP	甘油磷脂类	PG-P	磷脂酰甘油磷酸	C50H80O13P2	3	0.9601	-	50286.8	63118.4	49941.4	115347	112854	114582	1.38846	0.0042828	0.0310108	2.0985	1.06936	up
MW0061386	1-Stearoyl-2-vaccenoyl-sn-glycero-3-phospho-(1'-sn-glycerol-3'-phosphate)	1-Stearoyl-2-vaccenoyl-sn-glycero-3-phospho-(1'-sn-glycerol-3'-phosphate)	GP	甘油磷脂类	PG-P	磷脂酰甘油磷酸	C42H82O13P2	3	0.9432	-	109917	125582	111437	229622	252604	245166	1.40467	0.000193248	0.00642068	2.09661	1.06806	up
MW0054110	Isonuatigenin 3-[rhamnosyl-(1->2)-glucoside]	Isonuatigenin 3-[鼠李糖基-(1->2)-葡萄糖苷]	Steroids	甾体	Steroid	甾体	C39H62O13	3	0.9379	-	8646.11	27277.5	22831.6	112275	83397.1	127439	1.30659	0.0108297	0.0525877	5.49928	2.45924	up
MW0104596	2-amino-4-({1-[(carboxymethyl)-C-hydroxycarbonimidoyl]-2-{[1-hydroxy-1-(1-oxo-1H-isochromen-3-yl)butan-2-yl]sulfanyl}ethyl}-C-hydroxycarbonimidoyl)butanoic acid	2-氨基-4-({1-[（羧甲基)-C-羟基亚氨基甲酰基]-2-{[1-羟基-1-(1-氧代-1H-异色烯-3-基）丁-2-基]硫烷基}乙基}-C-羟基亚氨基甲酰基）丁酸	Organic acids	有机酸	Organic acids	有机酸	C23H29N3O9S	3	0.9312	-	6945.27	4455.37	8440.26	691.97	706.79	551.08	1.39561	0.035735	0.113286	0.0982738	-3.34705	down
MW0061550	PGP(a-13:0/i-18:0)	PGP(a-13:0/i-18:0)	GP	甘油磷脂类	PG-P	磷脂酰甘油磷酸	C37H74O13P2	3	0.9258	-	240855	248293	237000	545169	582751	577869	1.41538	0.000624827	0.0119841	2.34909	1.2321	up
FDATN00542	2-Hydroxy-1,4-naphthoquinone	2-Hydroxy-1,4-naphthoquinone	Benzene and substituted derivatives	苯及其衍生物	Benzene and substituted derivatives	苯及其衍生物	C10H6O3	3	0.9247	-	12537.7	3248.07	666.32	33431.1	57208.6	49492.2	1.19746	0.0136839	0.0614453	8.51756	3.09044	up
MW0010492	3'-Demethyletoposide	3'-去甲基依托泊苷	Lignans and Coumarins	木脂素和香豆素	Lignans	木脂素	C28H30O13	3	0.8973	-	377553	788550	916429	126831	136482	156674	1.33191	0.0759011	0.189738	0.201672	-2.30992	down
MW0058806	1-Adrenoyl-2-(1-enyl-stearoyl)-sn-glycero-3-phosphoethanolamine	PE(22:4(7Z,10Z,13Z,16Z)/P-18:0)	GP	甘油磷脂类	PE	磷脂酰乙醇胺	C45H82NO7P	3	0.8896	-	503.32	128.61	205.99	7824.29	7236.78	4846.4	1.37305	0.018623	0.0745443	23.7582	4.57035	up
MW0025806	CL(8:0/8:0/8:0/10:0)	CL(8:0/8:0/8:0/10:0)	GL	甘油脂类	CL	双磷酸甘油酯	C43H82O17P2	3	0.8881	-	21717.8	25312.3	19228.9	47790.1	48976.2	46518.9	1.38816	0.00168155	0.0191815	2.1625	1.1127	up
MW0050226	1-(6Z,9Z,12Z-octadecatrienoyl)-2-(5Z,8Z,11Z,14Z,17Z-eicosapentaenoyl)-sn-glycerol	1-(6Z,9Z,12Z-octadecatrienoyl)-2-(5Z,8Z,11Z,14Z,17Z-eicosapentaenoyl)-sn-glycerol	GL	甘油脂类	DG	甘油二酯	C41H64O5	3	0.8835	-	19562.3	14046.6	20258.4	41796.2	55428.8	45443.3	1.36063	0.00819827	0.0447943	2.64851	1.40518	up
MW0061286	CID 131823277	PG(a-13:0/i-14:0)	GP	甘油磷脂类	PG	磷脂酰甘油	C33H65O10P	3	0.8834	-	782455	1.49955e+06	218837	27593.7	14019.8	48209.7	1.30669	0.162279	0.315156	0.0359172	-4.79918	down
MW0130245	2-(3-hydroxyphenyl)-4-[3,5,7-trihydroxy-2-(4-hydroxy-3-methoxyphenyl)-3,4-dihydro-2H-1-benzopyran-8-yl]-6-[3,4,5-trihydroxy-6-(hydroxymethyl)oxan-2-yl]-3,4-dihydro-2H-1-benzopyran-3,5,7-triol	2-(3-羟基苯基)-4-[3，5，7-三羟基-2-(4-羟基-3-甲氧基苯基)-3，4-二氢-2H-1-苯并吡喃-8-基]-6-[3，4，5-三羟基-6-(羟甲基）恶烷-2-基]-3，4-二氢-2H-1-苯并吡喃-3，5，7-三醇	Benzene and substituted derivatives	苯及其衍生物	Benzene and substituted derivatives	苯及其衍生物	C37H38O16	3	0.8817	-	639.48	264.71	485.78	3271.64	5536.14	5073.9	1.37136	0.024126	0.0876844	9.98704	3.32006	up
MW0103413	6-Mercaptopurine ribonucleoside 5'-diphosphate	6-巯基嘌呤核苷5-二磷酸	Nucleotides and derivatives	核苷酸及其衍生物	Nucleotides and derivatives	核苷酸及其衍生物	C10H14N4O10P2S	3	0.881	-	65.89	1586.78	58.41	4760.37	4496.23	5195.73	1.18239	0.00701594	0.04106	8.44632	3.07832	up
MW0104274	1-Hydroxyoct-2-enoylglycine	1-hydroxyoct-3-enoylglycine	Amino acids and derivatives	氨基酸及其衍生物	Amino acids and derivatives	氨基酸及其衍生物	C10H17NO4	3	0.8778	-	36022.4	39863.4	37987.4	90828.4	91268.3	98893.8	1.41213	0.000551944	0.0110956	2.46758	1.30309	up
MW0128558	[2-(5,7-Dihydroxy-4-oxo-2-phenyl-2,3-dihydrochromen-8-yl)-3,5-dihydroxy-6-(hydroxymethyl)oxan-4-yl] hydrogen sulate	[2-(5，7-二羟基-4-氧代-2-苯基-3，4-二氢-2H-1-苯并吡喃-8-基)-3，5-二羟基-6-(羟甲基）恶烷-4-基]氧代磺酸	Organic acids	有机酸	Organic acids	有机酸	C21H22O12S	3	0.8774	-	57637.4	68338.3	87251.9	20119.6	42819.5	42272.2	1.13935	0.0356152	0.113137	0.493422	-1.01911	down
MW0015806	Annoglaxin	Annoglaxin	FA	脂肪酰类	Others	其它	C35H62O8	3	0.8744	-	1.1251e+06	1.00842e+06	1.23175e+06	2.42751e+06	2.55415e+06	1.95252e+06	1.36545	0.0147159	0.0644931	2.06051	1.043	up
MW0132179	3,4,5-trihydroxy-6-{[5-methoxy-2,2-dimethyl-6-(3-oxo-3-phenylprop-1-en-1-yl)-2H-chromen-7-yl]oxy}oxane-2-carboxylic acid	6-{[2,2-二甲基-6-(3-氧代-3-苯基丙-1-烯-1-基)-2H-铬-5-基]氧基} -3,4,5-三羟基氧烷-2 -羧酸	Organic acids	有机酸	Organic acids	有机酸	C27H28O10	3	0.8642	-	4413.42	4736.56	5231.53	10342.6	20895.7	10952.2	1.29294	0.112762	0.245458	2.93366	1.5527	up
MW0105021	3-hydroxy-2-methyl-2-[(sulfooxy)methyl]propanoic acid	3-羟基-2-甲基-2-[（磺氧基）甲基]丙酸	Organic acids	有机酸	Organic acids	有机酸	C5H10O7S	3	0.8557	-	5200.42	6901.22	6543.65	27069.6	27767.4	25944.6	1.40748	9.83526e-06	0.00177636	4.33255	2.11522	up
MEDP0798	1-Naphthylamine	1-萘胺	Alkaloids	生物碱	Alkaloids	生物碱	C10H9N	3	0.8495	-	72448.1	84400.8	81765	193712	202826	213119	1.4084	0.00014843	0.00571062	2.55499	1.35332	up
MEDP1438	Carnitine C6:1	肉碱 C6:1	FA	脂肪酰类	CAR	酰基肉碱	C13H23NO4	3	0.8145	-	245.47	116.53	233.98	886.3	368.52	591.13	1.20255	0.0997767	0.227791	3.09734	1.63103	up
MEDP1022	2-[(2-Amino-3-hydroxybutanoyl)amino]-3-phenylpropanoic acid	苏氨酸-苯丙氨酸	Amino acids and derivatives	氨基酸及其衍生物	Amino acids and derivatives	氨基酸及其衍生物	C13H18N2O4	3	0.7903	-	10630.8	10690.4	11643.7	3271.1	5425.45	1732.41	1.253	0.0136043	0.0611721	0.316366	-1.66033	down
MW0112109	2-Decarboxybetanin	2-脱羧甜菜碱	Others	其它类	Others	其它	C23H27N2O11	3	0.7903	-	161634	163879	160555	60975.4	56385.8	56314	1.41584	3.58935e-06	0.00144509	0.357306	-1.48477	down
MW0012773	1-arachidonoyl-sn-glycero-3-phospho-1D-myo-inositol	1-花生四烯酸-sn-glycero-3-phospho-1D-myo-inositol	GP	甘油磷脂类	PI	磷脂酰肌醇	C29H49O12P	3	0.7882	-	145786	13871.4	2692.31	1392.95	272.22	501.32	1.14351	0.365135	0.533748	0.0133446	-6.2276	down
MW0135496	6-[3,7-dihydroxy-2-(3-hydroxyphenyl)-3,4-dihydro-2H-1-benzopyran-4-yl]-8-[2-(3,4-dihydroxyphenyl)-3,7-dihydroxy-3,4-dihydro-2H-1-benzopyran-4-yl]-2-(4-hydroxy-3-methoxyphenyl)-3,4-dihydro-2H-1-benzopyran-3,5,7-triol	6-[3，7-二羟基-2-(3-羟基苯基)-3，4-二氢-2H-1-苯并吡喃-4-基]-8-[2-(3，4-二羟基苯基)-3，7-二羟基-3H-4-二氢-2H-1-苯并吡喃-4-基]-2-(4-羟基-3-甲氧基苯基)-3，4-二氢-3H-1-苯并吡喃-3，5，7-三醇	Benzene and substituted derivatives	苯及其衍生物	Benzene and substituted derivatives	苯及其衍生物	C46H40O15	3	0.7788	-	125478	92146.3	92898.5	39425.8	38820.8	44619.9	1.37818	0.0267554	0.0934787	0.395676	-1.33761	down
MW0129217	{3-[8-(5,7-dihydroxy-4-oxo-2-phenyl-3,4-dihydro-2H-1-benzopyran-3-yl)-5,7-dihydroxy-4-oxo-3,4-dihydro-2H-1-benzopyran-2-yl]phenyl}oxidanesulfonic acid	{3-[8-(5，7-二羟基-4-氧代-2-苯基-3，4-二氢-2H-1-苯并吡喃-3-基)-5，7-二羟基-4-氧代-3，4-二氢-2H-1-苯并吡喃-2-基]苯基}氧代磺酸	Organic acids	有机酸	Organic acids	有机酸	C30H22O12S	3	0.7741	-	1644.82	1885.38	1540.07	135.23	95.14	155.06	1.40755	0.00343698	0.0278801	0.0760176	-3.71752	down
MW0061098	PG(16:0/20:3(5Z,8Z,11Z))	PG(16:0/20:3(5Z,8Z,11Z))	GP	甘油磷脂类	PG	磷脂酰甘油	C42H77O10P	3	0.7545	-	80023.5	53294.9	63882	157956	154769	113419	1.31141	0.0173898	0.0715287	2.16097	1.11168	up
MEDP1139	(9E,12E)-N-(2-Hydroxyethyl)octadeca-9,12-dienamide	亚油酰基乙醇酰胺	Alcohol and amines	醇、胺类	Amines	胺类	C20H37NO2	3	0.7495	-	74140.8	115998	104523	237234	232913	248258	1.35755	0.00367529	0.0285164	2.43807	1.28574	up
MW0016267	Butyl(S)-3-hydroxybutyrate [arabinosyl-(1->6)-glucoside]	(S)-3-羟基丁酸丁酯 [阿拉伯糖基-(1->6)-葡萄糖苷]	Lipids	脂质	Free fatty acids	游离脂肪酸	C19H34O12	3	0.7485	-	103359	122519	127597	45787.5	31449.9	47259.7	1.36687	0.00175875	0.0194924	0.352209	-1.5055	down
MW0000106	7-Formyldehydrothalicsimidine	7-甲酰基脱氢噻嘧啶	Alkaloids	生物碱	Alkaloids	生物碱	C23H25NO6	3	0.7466	-	143861	148174	135266	365813	406846	382597	1.41309	0.00106749	0.015079	2.70361	1.43489	up
MW0061290	[(2R)-1-[[(2S)-2,3-dihydroxypropoxy]-hydroxyphosphoryl]oxy-3-(10-methyldodecanoyloxy)propan-2-yl] 16-methylheptadecanoate	PG(a-13:0/i-18:0)	GP	甘油磷脂类	PG	磷脂酰甘油	C37H73O10P	3	0.7452	-	60833.8	38544.2	49279.9	8120.56	5750.86	1422.84	1.29696	0.0141399	0.0627562	0.102882	-3.28093	down
MW0007228	Gabexate	加贝沙	Benzene and substituted derivatives	苯及其衍生物	Benzene and substituted derivatives	苯及其衍生物	C16H23N3O4	3	0.7411	-	7005.09	2594.03	3217.14	18885	21189.5	13737.5	1.30108	0.0100314	0.050462	4.19873	2.06995	up
MEDP0450	4-aminobenzoate	对-氨基苯甲酸	Benzene and substituted derivatives	苯及其衍生物	Benzene and substituted derivatives	苯及其衍生物	C7H6NO2-	3	0.7409	-	9554.37	11705.5	19221.5	2314.91	3726.32	4130.86	1.31635	0.0701385	0.180243	0.251278	-1.99264	down
MW0003445	3-(3,4-dimethoxyphenyl)-N-[2-(3,4-dimethoxyphenyl)-2-(sulfooxy)ethyl]prop-2-enimidic acid	6-[6-(2-{[2-(3,4-二甲氧基苯基）乙基]-C-羟基碳酰胺基}乙基-1-烯-1-基)-2,3-二甲氧基苯氧基]-3,4,5-三羟基氧烷-2-羧酸	Organic acids	有机酸	Organic acids	有机酸	C21H25NO9S	3	0.7364	-	177802	222409	218569	61831.6	73728.1	65070.2	1.4004	0.00742303	0.0423002	0.324235	-1.62489	down
MW0000110	8-Carboxymethyldihydrochelerythrine	8-羧甲基二氢白屈菜红碱	Alkaloids	生物碱	Alkaloids	生物碱	C23H21NO6	3	0.736	-	112546	102482	125509	243235	241242	267756	1.39765	0.000309467	0.00831468	2.20896	1.14337	up
MEDL02283	3-Methoxyanthranilate	2-氨基-3-甲氧基苯甲酸	Phenolic acids	酚酸类	Phenolic acids	酚酸类	C8H9NO3	3	0.735	-	19042.4	14374.8	16882.5	45265.9	37902.1	40220.9	1.38619	0.00155428	0.0183744	2.45307	1.29459	up
MW0013478	2-Hexaprenyl-6-methoxy-1,4-benzoquinone	2-己异戊烯基-6-甲氧基-1，4-苯醌	Benzene and substituted derivatives	苯及其衍生物	Benzene and substituted derivatives	苯及其衍生物	C37H54O3	3	0.7333	-	41295.2	42771.9	47502.9	140871	135722	151566	1.41197	0.000631823	0.0120827	3.25423	1.70232	up
MW0006666	Cyanofenphos	氰基苯磷	Benzene and substituted derivatives	苯及其衍生物	Benzene and substituted derivatives	苯及其衍生物	C15H14NO2PS	3	0.7324	-	292.06	583.44	511.66	114.22	176.7	49.63	1.22843	0.0421332	0.126302	0.245502	-2.0262	down
MW0104470	Triethylene glycol dimethacrylate	三甘醇二甲基丙烯酸酯	Others	其它类	Lactones	内酯类化合物	C14H22O6	3	0.7279	-	9170.21	7387.12	17370.4	39148.4	21622.8	20487.5	1.14147	0.103195	0.231695	2.39505	1.26006	up
MW0017015	CerP(d18:1/16:0)	CerP（d18：1/16：0）	SL	鞘脂类	Cer	神经酰胺	C34H68NO6P	3	0.7273	-	28456.3	10225	28843	49155.7	31167.5	59738.2	1.00767	0.0856288	0.206054	2.07424	1.05258	up
MW0061676	1-hexadecanoyl-2-(9Z-hexadecenoyl)-glycero-3-phospho-(1'-myo-inositol)	PI(16:0/16:2(9Z,12Z))	GP	甘油磷脂类	PI	磷脂酰肌醇	C41H77O13P	3	0.7263	-	64203.1	145063	41833.1	15792	18422.6	2737.4	1.16663	0.147555	0.296019	0.147161	-2.76453	down
MW0128921	{[(6E)-3-oxo-1,7-diphenylhept-6-en-2-yl]oxy}sulfonic acid	{[（6E)-3-氧代-1，7-二苯基庚-6-烯-2-基]氧}磺酸	Organic acids	有机酸	Organic acids	有机酸	C19H20O5S	3	0.7244	-	1227.75	217.14	840.31	96.21	141.11	234.41	1.09313	0.174222	0.329752	0.206428	-2.27629	down
MW0007559	Mebeverine	美贝维林	Benzene and substituted derivatives	苯及其衍生物	Benzene and substituted derivatives	苯及其衍生物	C25H35NO5	3	0.723	-	4148.1	8503.98	5125.44	1363.75	2912.84	4151.44	1.01235	0.128654	0.268714	0.474084	-1.07679	down
MW0127669	({4-[2,4-dihydroxy-3-(3-methylbut-2-en-1-yl)benzoyl]-5-(2,4-dihydroxyphenyl)-3-{4-[(E)-2-(2,4-dihydroxyphenyl)ethenyl]-2,6-dihydroxyphenyl}cyclohex-1-en-1-yl}methoxy)sulfonic acid	（{4-[2，4-二羟基-3-(3-甲基丁-2-烯-1-基）苯甲酰基]-5-(2，4-二羟基苯基)-3-{4-[（E)-2-(2，4-dihydroxyphenyl）ethenyl]-2，6-二羟基苯基}环己-1-烯-1-基}甲氧基）磺酸	Organic acids	有机酸	Organic acids	有机酸	C39H38O13S	3	0.7191	-	20215.3	25562.6	29577.5	12500.2	3817.81	14581.7	1.08095	0.0270842	0.0942223	0.410054	-1.28612	down
MW0136456	6-{4-[3-(3,7-dimethylocta-2,6-dien-1-yl)-5,7-dihydroxy-6-(4-hydroxy-3-methylbut-2-en-1-yl)-4-oxo-3,4-dihydro-2H-1-benzopyran-2-yl]-3-hydroxyphenoxy}-3,4,5-trihydroxyoxane-2-carboxylic acid	6-{2-[3-(3，7-二甲基辛-2，6-二烯-1-基)-5，7-二羟基-6-(4-羟基-3-甲基丁-2-烯-1-基)-4-氧代-3，4-二氢-2H-1-苯并吡喃-2-基]-5-羟基苯氧基}-3，4，5-三羟基恶烷-2-羧酸	Organic acids	有机酸	Organic acids	有机酸	C36H44O13	3	0.7184	-	44343.7	137342	35094.1	181796	208167	130242	1.08142	0.0713876	0.18227	2.39969	1.26285	up
MW0137304	CID 44256852	货号 44256852	Benzene and substituted derivatives	苯及其衍生物	Benzene and substituted derivatives	苯及其衍生物	C39H43O20+	3	0.7143	-	135911	83382.8	81177.3	39307.4	34284.6	23715.3	1.31488	0.0553994	0.152003	0.323849	-1.62661	down
MW0121652	5-methyltetrahydropteroyltri-L-glutamate	5-甲基四氢蝶酰基三-L-谷氨酸	Amino acids and derivatives	氨基酸及其衍生物	Amino acids and derivatives	氨基酸及其衍生物	C30H39N9O12	3	0.7105	-	13026.1	12488.5	5378.54	22396.9	20738.8	23922.9	1.16898	0.0276119	0.0954634	2.17066	1.11814	up
MW0055594	PA(15:0/20:3(5Z,8Z,11Z))	PA(15:0/20:3(5Z,8Z,11Z))	GP	甘油磷脂类	PA	磷脂酸	C38H69O8P	3	0.7082	-	466.2	550.43	494.68	2881.1	5375.21	1113.12	1.23609	0.168213	0.322156	6.19954	2.63216	up
MW0055683	[(2R)-1-octadecanoyloxy-3-phosphonooxypropan-2-yl] tetracosanoate	PA(18:0/24:0)	GP	甘油磷脂类	PA	磷脂酸	C45H89O8P	3	0.7044	-	10284.2	13987	15977.1	8007.53	5983.46	3330.08	1.18861	0.0253332	0.0904116	0.430355	-1.2164	down
MW0115449	Urolithin A 3,8-O-diglucuronide	尿石素 A 3,8-O-二葡糖苷酸	Others	其它类	Saccharides	糖类	C25H24O16	3	0.7011	-	38244	39727.3	22979.2	15355.7	20730.8	11150.8	1.18275	0.0590324	0.158738	0.467925	-1.09565	down
MW0132083	3,4,5-trihydroxy-6-{[3-hydroxy-2-(4-hydroxyphenyl)-4-oxo-7-[(3,4,5-trihydroxy-6-methyloxan-2-yl)oxy]-4H-chromen-5-yl]oxy}oxane-2-carboxylic acid	3，4，5-三羟基-6-{[3-羟基-2-(4-羟基苯基)-4-氧代-7-[（3，4，5-三羟基-6-甲基氧烷-2-基）氧]-4H-色烯-5-基]氧}氧烷-2-羧酸	Organic acids	有机酸	Organic acids	有机酸	C27H28O16	3	0.7006	-	77.79	76.82	177.8	552.98	356.13	1024.6	1.28118	0.110929	0.242766	5.81724	2.54034	up
MW0128614	CID 78055824	[2-羟基-5-(3，5，7-三羟基-3，4-二氢-2H-1-苯并吡喃-2-基）苯基]氧代磺酸	Organic acids	有机酸	Organic acids	有机酸	C15H14O9S	3	0.6994	-	4031.48	3623.66	3008.33	3417.53	497.2	401.86	1.00827	0.157519	0.309142	0.404802	-1.30471	down
MEDL00426	Isoleucyllysine	异亮氨酸-赖氨酸	Amino acids and derivatives	氨基酸及其衍生物	Amino acids and derivatives	氨基酸及其衍生物	C12H25N3O3	3	0.6966	-	42431.6	44683.8	42586.9	20482.7	18518.1	22666.7	1.39953	0.000296763	0.00807343	0.475454	-1.07262	down
MW0012778	1-Docosanoyl-sn-glycero-3-phosphocholine	1-Behenoyl-2-hydroxy-sn-glycero-3-phosphocholine	GP	甘油磷脂类	PC	磷脂酰胆碱	C30H62NO7P	3	0.6886	-	14971.6	9293.2	11418.6	36463.5	29670.2	35355.7	1.36271	0.00151822	0.0182191	2.84416	1.508	up
MW0127639	({1-[6-(5,7-dihydroxy-4-oxo-3,4-dihydro-2H-1-benzopyran-2-yl)-7-hydroxy-2-methyl-2H-chromen-2-yl]-4-methylpent-3-en-1-yl}oxy)sulfonic acid	（{1-[6-(5，7-二羟基-4-氧代-3，4-二氢-2H-1-苯并吡喃-2-基)-7-羟基-2-甲基-2H-苯并吡喃-2-基]-4-甲基戊-3-烯-1-基}氧基）磺酸	Organic acids	有机酸	Organic acids	有机酸	C25H26O10S	3	0.6872	-	5385.44	5766.09	9395	9168.39	17287.3	15317.4	1.13888	0.0824153	0.201075	2.03309	1.02368	up
MW0061375	Pgp(16:1(9Z)/18:3(6Z,9Z,12Z))	Pgp(16:1(9Z)/18:3(6Z,9Z,12Z))	GP	甘油磷脂类	PG-P	磷脂酰甘油磷酸	C40H72O13P2	3	0.6869	-	563.29	570.41	1343.89	2999.91	1859.3	1940.55	1.2116	0.0381124	0.118267	2.74451	1.45655	up
MW0130459	Methyl 2,5-dihydroxycinnamate	2，5-二羟基肉桂酸甲酯	Organic acids	有机酸	Organic acids	有机酸	C10H10O4	3	0.685	-	322.72	332.04	220.15	83.23	114.19	88.04	1.35935	0.0252244	0.090343	0.326274	-1.61585	down
MW0113053	4-Hydroperoxy-2-nonenal	4-Hydroperoxy-2-nonenal	Others	其它类	Ketone compounds	酮类化合物	C9H16O3	3	0.6829	-	255.5	1093.76	564.42	2320.56	3018.17	2707.18	1.24986	0.00337162	0.0276796	4.20442	2.07191	up
MW0111936	2,3-Butanediol apiosylglucoside	2,3-丁二醇阿魏糖苷	Alcohol and amines	醇、胺类	Alcohols	醇类	C15H28O11	3	0.6824	-	15774	15848.2	10485.5	5869.11	6297.85	3175.04	1.26947	0.0201507	0.0784549	0.364351	-1.4566	down
MW0134860	6-(2-{5,7-dihydroxy-3-[(2Z)-4-hydroxy-3-(4-methylpent-3-en-1-yl)but-2-en-1-yl]-6-(3-methylbut-2-en-1-yl)-4-oxo-3,4-dihydro-2H-1-benzopyran-2-yl}-5-hydroxyphenoxy)-3,4,5-trihydroxyoxane-2-carboxylic acid	6-(2-{5，7-二羟基-3-[（2Z)-4-羟基-3-(4-甲基戊-3-烯-1-基)-2-丁-1-基]-6-(3-甲基丁-2-烯-1-基)-4-氧代-3，4-二氢-2H-1-苯并吡喃-2-基}-5-羟基苯氧基)-3，4，5-三羟基恶烷-2-羧酸	Organic acids	有机酸	Organic acids	有机酸	C36H44O13	3	0.682	-	5859.11	30005.2	4843.97	42129	51988	27412.3	1.07619	0.069906	0.179869	2.98537	1.57791	up
MW0003439	3-(3,4-dihydroxyphenyl)-N-(2-(3,4-dihydroxyphenyl)ethyl)propanamide	3-(3,4-二羟苯基)-N-[2-(3,4-二羟苯基）乙基]丙胺酸	Phenolic acids	酚酸类	Phenolic acids	酚酸类	C17H19NO5	3	0.6813	-	1781.73	2952.98	1555.11	1541.77	446.97	656.14	1.07551	0.0950893	0.221364	0.420502	-1.24982	down
MW0137135	8,16-Dihydroxy-6-(6-hydroxy-1-benzouran-2-yl)-12-methyl-3,13-dioxapentacyclo[10.7.1.02,10.04,9.014,19]icosa-2(10),4,6,8,14(19),15,17-heptaen-11-one	8,16-二羟基二十碳四烯酸	Lipids	脂质	Free fatty acids	游离脂肪酸	C27H18O7	3	0.6805	-	26754.1	31327.2	33954.7	235356	209035	237423	1.41307	0.0013764	0.0172768	7.40813	2.88911	up
MW0001005	{[1-(4-hydroxy-3-methoxyphenyl)-3-oxobutan-2-yl]oxy}sulfonic acid	{[1-(4-羟基-3-甲氧基苯基)-3-氧代丁烷-2-基]氧基}磺酸	Phenolic acids	酚酸类	Phenolic acids	酚酸类	C11H14O7S	3	0.6802	-	2199.67	2062.97	2864.92	13919.3	14130.9	15619.6	1.40803	0.000364844	0.00901984	6.1269	2.61516	up
MW0106609	Ethanesulfonic acid	乙磺酸	Organic acids	有机酸	Organic acids	有机酸	C2H6O3S	3	0.6785	-	94036.3	123864	136802	56807.8	46134.6	52446.4	1.35371	0.0286687	0.0981629	0.438082	-1.19073	down
MW0000244	Emetan, 6',7',10,11-tetramethoxy-	Emetan, 6',7',10,11-四甲氧基-	Benzene and substituted derivatives	苯及其衍生物	Benzene and substituted derivatives	苯及其衍生物	C29H40N2O4	3	0.6778	-	2063.62	1402.62	1011.3	4636.63	4156.76	2619.89	1.23243	0.0436113	0.129229	2.54901	1.34994	up
MW0111778	(3-Amino-5-methyl-1-adamantyl)methanol	(3-氨基-5-甲基-1-金刚烷基)甲醇	Alcohol and amines	醇、胺类	Amines	胺类	C12H21NO	3	0.6769	-	14403.6	14401.8	15202.5	43823.9	52716.8	47819.7	1.41145	0.00545377	0.0358911	3.28032	1.71384	up
MW0135380	6-[2-(6-carboxy-5-{4-[(E)-2-(2,4-dihydroxyphenyl)ethenyl]-2,6-dihydroxyphenyl}-3-methylcyclohex-3-en-1-yl)-5-hydroxyphenoxy]-3,4,5-trihydroxyoxane-2-carboxylic acid	6-[2-(6-羧基-5-{4-[（E)-2-(2，4-二羟基苯基）乙烯基]-2，6-二羟基苯基}-3-甲基环己-3-烯-1-基)-5-羟基苯氧基]-3，4，5-三羟基恶烷-2-羧酸	Organic acids	有机酸	Organic acids	有机酸	C34H34O14	3	0.6757	-	4996.78	9038.78	6925.04	2407.49	2235.36	1387.42	1.32048	0.0428571	0.127824	0.287695	-1.79739	down
MW0129304	{4-[3-(4,5-dihydroxy-7-methoxy-2,2-dimethyl-3,4-dihydro-2H-1-benzopyran-6-yl)-3-oxoprop-1-en-1-yl]phenyl}oxidanesulfonic acid	{5-羟基-6-[3-(4-羟基苯基）丙-2-烯酰基]-7-甲氧基-2，2-二甲基-3，4-二氢-2H-1-苯并吡喃-4-基}氧烷磺酸	Organic acids	有机酸	Organic acids	有机酸	C21H22O9S	3	0.6755	-	501.93	896.1	908.69	1312.74	6853.57	5839.02	1.16498	0.148404	0.296992	6.07153	2.60206	up
MW0055387	Notoginsenoside J	三七皂苷 J	Terpenoids	萜类	Triterpene Saponin	三萜皂苷	C42H74O16	3	0.6632	-	57851.6	82099.2	136262	231015	171841	279760	1.21286	0.0287078	0.0982411	2.47134	1.30529	up
MW0002612	2-Acetylaminofluorene	2-乙酰胺基芴; N-2-氟烯基乙酰胺	Benzene and substituted derivatives	苯及其衍生物	Benzene and substituted derivatives	苯及其衍生物	C15H13NO	3	0.6628	-	21662.2	29535.9	26435.1	12992.9	6600.09	6014.8	1.29521	0.00562766	0.0365903	0.329856	-1.60009	down
MW0106365	4-Azaniumyl-4,5-dihydro-1,2-oxazol-3-olate	4-Azaniumyl-4,5-dihydro-1,2-oxazol-3-olate	Organic acids	有机酸	Organic acids	有机酸	C3H6N2O2	3	0.6622	-	17353.8	23441.4	28122.9	11340.2	12869.1	7679.24	1.24678	0.0397571	0.121762	0.462703	-1.11184	down
MW0145595	Arginyl-Histidine	Arg His	Amino acids and derivatives	氨基酸及其衍生物	Amino acids and derivatives	氨基酸及其衍生物	C12H21N7O3	3	0.66	-	1648.37	2249.47	1473.69	4978.6	4840.87	4438.11	1.37073	0.000879352	0.0137111	2.65429	1.40832	up
MW0061370	Pgp(16:1(9Z)/16:1(9Z))	Pgp(16:1(9Z)/16:1(9Z))	GP	甘油磷脂类	PG-P	磷脂酰甘油磷酸	C38H72O13P2	3	0.6596	-	25605.8	62943.6	20431.6	88822.9	58482.5	91551.6	1.08672	0.0675738	0.175492	2.19173	1.13207	up
MW0132263	3,4,5-trihydroxy-6-{[8-(2-hydroxypropan-2-yl)-4-(1-hydroxypropyl)-2-oxo-2H,8H,9H-furo[2,3-h]chromen-5-yl]oxy}oxane-2-carboxylic acid	3，4，5-三羟基-6-{[8-(2-羟基丙-2-基)-4-(1-羟基丙基)-2-氧代-2H，8H，9H-呋喃并[2，3-h]苯并吡喃-5-基]氧}氧杂环己烷-2-羧酸	Organic acids	有机酸	Organic acids	有机酸	C23H28O12	3	0.659	-	11298.6	24768.3	21257	38242.5	38962.6	41721.4	1.20572	0.0297996	0.100705	2.07464	1.05286	up
MW0134526	5-hydroxy-4-(2-hydroxyphenyl)-8,8-dimethyl-6-(2-methylpropanoyl)-2H,8H-pyrano[2,3-f]chromen-2-one	5-羟基-4-(2-羟基苯基)-8，8-二甲基-6-(2-甲基丙酰基)-2H，8H-吡喃并[2，3-f]色烯-2-酮	Others	其它类	Ketone compounds	酮类化合物	C24H22O6	3	0.6587	-	1400.23	1400.23	1400.23	34475.9	32912.1	24213.2	1.41413	0.0117951	0.0556796	21.8062	4.44667	up
MEDP1574	3-Methyloxindole	3-甲基羟吲哚	Alkaloids	生物碱	Plumerane	吲哚类生物碱	C9H9NO	3	0.6565	-	3716.74	6623.67	3011.02	2412.5	1593.41	2645.23	1.07854	0.173382	0.328764	0.498159	-1.00532	down
MW0135982	6-{[4-(6,11-dihydroxy-2,2,5-trimethyl-10-oxo-5,10-dihydro-2H-1-oxa-5-azatetraphen-12-yl)-6-hydroxy-2-(hydroxymethyl)-2,5-dimethyl-10-oxo-3,4,5,10-tetrahydro-2H-1-oxa-5-azatetraphen-11-yl]oxy}-3,4,5-trihydroxyoxane-2-carboxylic acid	6-{[4-(6,11-二羟基-2,2,5-三甲基-10-氧代-5,10-二氢-2H-1-氧杂-5-氮杂二苯甲基-12-基)-6-羟基- 2-(羟甲基)-2,5-二甲基-10-氧代-3,4,5,10-四氢-2H-1-氧杂-5-氮杂二苯菲-11-基]氧基} -3,4,5-三羟基氧烷-2-羧酸	Organic acids	有机酸	Organic acids	有机酸	C44H42N2O15	3	0.6537	-	40545.2	37426.7	31336.7	58513.6	106385	97521.2	1.28117	0.0694335	0.179149	2.40072	1.26347	up
MW0135587	6-[4,5-dihydroxy-2-(3,5,6,7-tetrahydroxy-4-oxo-3,4-dihydro-2H-1-benzopyran-2-yl)phenoxy]-3,4,5-trihydroxyoxane-2-carboxylic acid	6-[4，5-二羟基-2-(3，5，6，7-四羟基-4-氧代-3，4-二氢-2H-1-苯并吡喃-2-基）苯氧基]-3，4，5-三羟基恶烷-2-羧酸	Organic acids	有机酸	Organic acids	有机酸	C21H20O15	3	0.6509	-	212.96	856.52	267.03	3228.9	6043.49	4784.03	1.32895	0.0287665	0.098279	10.5173	3.39469	up
MW0136936	7-Amino-4-methylcoumarin	7-氨基-4-甲基香豆素	Lignans and Coumarins	木脂素和香豆素	Coumarins	香豆素	C10H9NO2	3	0.6475	-	149.27	172.72	63.63	894.57	1913.74	741.96	1.32411	0.101936	0.229988	9.20665	3.20268	up
MW0113659	6-{[3,5-dihydroxy-2-(1-hydroxy-3-methoxy-4-oxocyclohex-2-en-1-yl)-6-methoxy-4-oxo-4H-chromen-7-yl]oxy}-3,4,5-trihydroxyoxane-2-carboxylic acid	6-{[3，5-二羟基-2-(1-羟基-3-甲氧基-4-氧代环己-2-烯-1-基)-6-甲氧基-4-氧代-4H-苯并吡喃-7-基]氧}-3，4，5-三羟基恶烷-2-羧酸	Organic acids	有机酸	Organic acids	有机酸	C23H24O15	3	0.6474	-	1674.95	558.35	531.3	7420.99	1107.51	3910.73	1.01849	0.215996	0.378648	4.49947	2.16975	up
MW0001509	1-Aminoanthracene	1-氨基蒽	Benzene and substituted derivatives	苯及其衍生物	Benzene and substituted derivatives	苯及其衍生物	C14H11N	3	0.6467	-	3407.49	3755.46	7290.81	2181.04	1589.09	746.76	1.18031	0.104348	0.233151	0.312506	-1.67804	down
MW0105092	3-Methyl-2-thioxoimidazolidin-4-one	3-甲基-2-硫代咪唑啉	Others	其它类	Ketone compounds	酮类化合物	C4H6N2OS	3	0.6435	-	5203.71	6385.76	6160.38	48177.2	78378.5	49483.8	1.40223	0.0330202	0.107834	9.9178	3.31002	up
MW0131214	3-(3,7-dimethylocta-2,6-dien-1-yl)-5,7-dihydroxy-6-(3-methylbut-2-en-1-yl)-2-(2,4,5-trihydroxyphenyl)-4H-chromen-4-one	2-(2，4-二羟基苯基)-3-(3，7-二甲基辛-2，6-二烯-1-基)-5，7-二羟基-6-(3-甲基丁-2-烯-1-基)-3，4-二氢-2H-1-苯并吡喃-4-酮	Others	其它类	Others	其它	C30H34O7	3	0.6427	-	71533.3	67466.9	74395.4	22452.6	28317.5	29795.8	1.39368	0.000134384	0.00546101	0.377543	-1.40529	down
MW0051626	[2-Hydroxy-3-(10-methylundecanoyloxy)propyl] 10-methylundecanoate	[2-Hydroxy-3-(10-methylundecanoyloxy)propyl] 10-methylundecanoate	GL	甘油脂类	DG	甘油二酯	C27H52O5	3	0.6421	-	42770.2	42296	28518	13456.3	24689.1	15682.8	1.22009	0.0302414	0.101828	0.473906	-1.07733	down
MW0115496	Zileuton O-glucuronide	齐留通O-葡糖苷酸	Heterocyclic compounds	杂环化合物	Heterocyclic compounds	杂环化合物	C17H20N2O8S	3	0.6405	-	297.34	803.97	1192.56	4866.56	8987.29	8581.68	1.32398	0.0320153	0.105733	9.78065	3.28993	up
MW0135000	Flavone base + 3O, O-HexA, C-Hex, C-Hex	6-(4-{5，7-二羟基-4-氧代-3，6-双[3，4，5-三羟基-6-(羟甲基）恶烷-2-基]-4H-色烯-2-基}苯氧基)-3，4，5-三羟基恶烷-2-羧酸	Organic acids	有机酸	Organic acids	有机酸	C33H38O21	3	0.6405	-	782.53	1195.75	3511.07	6892.28	2799.34	8338.6	1.07277	0.111197	0.243026	3.28458	1.71571	up
MW0061544	PGP(a-13:0/i-12:0)	PGP(a-13:0/i-12:0)	GP	甘油磷脂类	PG-P	磷脂酰甘油磷酸	C31H62O13P2	3	0.6382	-	7989.3	2627.33	3269.05	15559.1	20338	8120.28	1.15006	0.0878803	0.209918	3.16998	1.66448	up
MW0132575	3,4-dihydroxy-1-methyl-4,5-diphenylpiperidine-2,6-dione	3，4-二羟基-1-甲基-4，5-二苯基哌啶-2，6-二酮	Others	其它类	Ketone compounds	酮类化合物	C18H17NO4	3	0.6375	-	668245	715611	694380	112129	294587	146026	1.31172	0.00881399	0.0468688	0.265967	-1.91068	down
MW0122935	[(2R)-2-[(1R)-1,2-dihydroxyethyl]-3-hydroxy-5-oxo-2H-furan-4-yl] hydrogen sulfate	[(2R)-2-[(1R)-1,2-二羟乙基]-3-羟基-5-氧代-2H-呋喃-4-基]硫酸氢盐	Organic acids	有机酸	Organic acids	有机酸	C6H8O9S	3	0.6347	-	466.14	127.78	56.24	5071.82	4050.46	4372.72	1.33242	0.00165564	0.0190154	20.7564	4.37549	up
MW0128569	[2-(acetyloxy)-2-(9-{[(2E)-2-methylbut-2-enoyl]oxy}-2-oxo-2H,8H,9H-furo[2,3-h]chromen-8-yl)propoxy]sulfonic acid	[2-(乙酰氧基)-2-(9-{[（2E)-2-甲基丁-2-烯酰基]氧基}-2-氧代-2H，8H，9H-呋喃并[2，3-h]苯并吡喃-8-基）丙氧基]磺酸	Organic acids	有机酸	Organic acids	有机酸	C21H22O11S	3	0.6296	-	104688	129372	121671	15871.8	3368.02	11704.7	1.33237	0.00100104	0.0145285	0.0869886	-3.52303	down
MW0055544	[(2R)-1-decanoyloxy-3-phosphonooxypropan-2-yl] 22-methyltricosanoate	PA(10:0/i-24:0)	GP	甘油磷脂类	PA	磷脂酸	C37H73O8P	3	0.62	-	30117.6	49401.9	40815.1	101339	88996.8	99986.1	1.34482	0.00181639	0.0197825	2.41262	1.2706	up
MW0011581	(R)-1-O-[b-D-Glucopyranosyl-(1->6)-b-D-glucopyranoside]-1,3-octanediol	(R)-1-O-[b-D-Glucopyranosyl-(1->6)-b-D-glucopyranoside]-1,3-octanediol	Others	其它类	Saccharides	糖类	C20H38O12	3	0.6168	-	886.98	40.9	54.88	1427.42	1574.42	3843.04	1.14125	0.117203	0.251849	6.96496	2.80011	up
MW0118630	2-Hydroxy-imipramine glucuronide	2-羟基丙咪嗪葡糖苷酸	Heterocyclic compounds	杂环化合物	Heterocyclic compounds	杂环化合物	C25H32N2O7	3	0.6158	-	117.92	210.29	690.03	630.35	766.15	887.83	1.00886	0.126285	0.264701	2.24341	1.16569	up
MW0056800	PC(14:0/20:5(5Z,8Z,11Z,14Z,17Z))	PC(14:0/20:5(5Z,8Z,11Z,14Z,17Z))	GP	甘油磷脂类	PC	磷脂酰胆碱	C42H74NO8P	3	0.6134	-	7205.7	3600.66	4624.31	49525.7	50780.7	10262.1	1.19846	0.139051	0.283599	7.16551	2.84107	up
MW0061675	Dipalmitoyl phosphatidylinositol	PI(16:0/16:1(9Z))	GP	甘油磷脂类	PI	磷脂酰肌醇	C41H79O13P	3	0.6121	-	177353	215294	192615	71289.6	28502.1	39997.3	1.33237	0.0010149	0.0146642	0.238849	-2.06583	down
MW0131789	3,4,5-trihydroxy-6-[2-(2-hydroxy-2-phenylacetyl)phenoxy]oxane-2-carboxylic acid	3,4,5-三羟基-6-[2-(2-羟基-2-苯乙酰基）苯氧基]氧烷-2-羧酸	Organic acids	有机酸	Organic acids	有机酸	C20H20O9	3	0.61	-	6425.57	5955.66	6750.12	837.42	2648.91	2415.85	1.22908	0.00840201	0.045487	0.308508	-1.69662	down
MW0133092	3-hydroxy-3-phenyl-1-[2,4,6-trihydroxy-3-(3-methylbut-2-en-1-yl)phenyl]propan-1-one	3-羟基-3-苯基-1-[2，4，6-三羟基-3-(3-甲基-2-丁烯基）苯基]-1-丙酮	Others	其它类	Ketone compounds	酮类化合物	C20H22O5	3	0.6062	-	1174.01	1018.32	1088.82	840.96	87.31	39.98	1.05371	0.0929463	0.217466	0.295095	-1.76075	down
MW0136427	6-{4-[3-(3,4-dihydroxyphenyl)-2-oxopropanoyl]-2,3,5-trihydroxyphenoxy}-3,4,5-trihydroxyoxane-2-carboxylic acid	6-{4-[3-(3，4-二羟基苯基)-2-氧代丙酰基]-2，3，5-三羟基苯氧基}-3，4，5-三羟基恶烷-2-羧酸	Organic acids	有机酸	Organic acids	有机酸	C21H20O14	3	0.5995	-	43884.5	42776.7	45532.3	18944.4	22448	13646.2	1.34681	0.00581772	0.0373414	0.416348	-1.26414	down
MW0112365	3,4,5-trihydroxy-6-({7-oxo-7H-furo[3,2-g]chromen-4-yl}oxy)oxane-2-carboxylic acid	3，4，5-三羟基-6-({7-氧代-7H-呋喃并[3，2-g]苯并吡喃-4-基}氧基）氧烷-2-羧酸	Organic acids	有机酸	Organic acids	有机酸	C17H14O10	3	0.5925	-	3777.74	90.78	4237.89	16118	16598	19273.9	1.03938	0.00123103	0.0162027	6.41342	2.68109	up
MW0130000	2-(2,4-dihydroxyphenyl)-3-(3,7-dimethylocta-2,6-dien-1-yl)-5,7-dihydroxy-6-(4-hydroxy-3-methylbut-2-en-1-yl)-3,4-dihydro-2H-1-benzopyran-4-one	2-(2，4-二羟基苯基)-5，7-二羟基-3-(4-羟基-3，7-二甲基辛-2，6-二烯-1-基)-6-(3-甲基丁-2-烯-1-基)-3，4-二氢-2H-1-苯并吡喃-4-酮	Others	其它类	Others	其它	C30H36O7	3	0.5839	-	19685.2	14214.6	8783.33	4507.4	5817.28	2087.03	1.2095	0.0720485	0.183226	0.290787	-1.78196	down
MW0156239	Pyricarbate	焦碳酸	Others	其它类	Lactones	内酯类化合物	C11H15N3O4	3	0.5828	-	1905.71	7809.81	10333.4	23039.7	22157.6	28783	1.16278	0.00572998	0.0369974	3.68999	1.88362	up
MW0059004	PE(DiMe(9,3)/DiMe(9,3))	PE(DiMe(9,3)/DiMe(9,3))	GP	甘油磷脂类	PE	磷脂酰乙醇胺	C41H70NO10P	3	0.5824	-	28058	27970.5	17794.8	68595.3	72069.2	73886.9	1.36515	0.00153554	0.0182191	2.90628	1.53917	up
MW0055856	PA(18:4(6Z,9Z,12Z,15Z)/22:6(4Z,7Z,10Z,13Z,16Z,19Z))	PA(18:4(6Z,9Z,12Z,15Z)/22:6(4Z,7Z,10Z,13Z,16Z,19Z))	GP	甘油磷脂类	PA	磷脂酸	C43H65O8P	3	0.5793	-	72401	80815.9	109879	206802	281993	255978	1.35957	0.00754545	0.042737	2.8308	1.50121	up
MW0107527	Imazethapyr	咪草烟	Organic acids	有机酸	Organic acids	有机酸	C15H19N3O3	3	0.5786	-	248.18	299.2	177.47	721.69	926.79	574.56	1.33161	0.0288147	0.0983482	3.0669	1.61678	up
MW0054328	(5S,6R,7E,9E,11Z,14Z)-6-[(2S)-2-amino-2-carboxyethyl]sulfanyl-5-hydroxyicosa-7,9,11,14-tetraenoic acid	(5S,6R,7E,9E,11Z,14Z)-6-[(2S)-2-amino-2-carboxyethyl]sulfanyl-5-hydroxyicosa-7,9,11,14-tetraenoic acid	Lipids	脂质	Free fatty acids	游离脂肪酸	C23H37NO5S	3	0.5761	-	18343.8	19322.4	2103.52	43683.1	35739.6	55881.1	1.03612	0.0171045	0.0707437	3.40217	1.76646	up
MW0116694	1,4'-Bipiperidine-1'-carboxylic acid	1，4'-联哌啶-1'-羧酸；[1，4'-联哌啶]-1'-羧酸	Organic acids	有机酸	Organic acids	有机酸	C11H20N2O2	3	0.5737	-	1886.41	3186.71	1965.48	3824.27	5801.4	6806.53	1.2336	0.0514614	0.144787	2.33458	1.22317	up
MW0138486	Isolimocitrol 3-glucoside	异柠檬醇3-葡萄糖苷	Flavonoids	黄酮	Flavones	黄酮	C24H26O14	3	0.5718	-	36065.9	52538.8	76561.1	120560	152475	157680	1.28423	0.0058552	0.037471	2.60778	1.38282	up
MW0055935	1,2-di-(11Z-eicosenoyl)-sn-glycero-3-phosphate	PA(20:1(11Z)/20:1(11Z))	GP	甘油磷脂类	PA	磷脂酸	C43H81O8P	3	0.5712	-	7.16171e+06	2.10662e+07	3.16687e+06	1.38771e+06	1.01402e+06	604168	1.23223	0.223034	0.385697	0.0957454	-3.38465	down
MW0130909	2-Phenyl-1-(2,3,4-trihydroxyphenyl)propan-1-one	2-苯基-1-(2，3，4-三羟基苯基）丙-1-酮	Others	其它类	Ketone compounds	酮类化合物	C15H14O4	3	0.5681	-	4.42098e+06	3.28245e+06	5.12973e+06	8.66371e+06	8.67287e+06	9.10562e+06	1.33475	0.00974061	0.0495955	2.06046	1.04297	up
MW0000023	(+/-)-6-Acetonyldihydrosanguinarine	6-乙炔基-5,6-二氢血根碱	Alkaloids	生物碱	Isoquinoline alkaloids	异喹啉类生物碱	C23H19NO5	3	0.5658	-	43112.8	46540.7	45163.4	4497.48	18594.6	18283.3	1.16569	0.0179447	0.0731057	0.3069	-1.70416	down
MW0131477	3,4,5-trihydroxy-2,8-bis(3,5,7-trihydroxy-3,4-dihydro-2H-1-benzopyran-2-yl)-6H-benzo[7]annulen-6-one	3,4,5-三羟基-2,8-双（3,5,7-三羟基-3,4-二氢-2H-1-苯并吡喃-2-基)-6H-苯并[7]环烯-6-酮	Benzene and substituted derivatives	苯及其衍生物	Benzene and substituted derivatives	苯及其衍生物	C29H24O12	3	0.5647	-	13293.3	7646.62	9805.72	14953	40302.1	30196.5	1.16613	0.125639	0.264028	2.77931	1.47472	up
MW0112359	3,4,5-trihydroxy-6-({3-oxo-3-[(3,4,5,6-tetrahydroxyoxan-2-yl)methoxy]propanoyl}oxy)oxane-2-carboxylic acid	3,4,5-三羟基-6-({3-氧代-3-[（3,4,5,6-四羟基氧烷-2-基）甲氧基]丙酰基}氧基）氧烷-2-羧酸	Organic acids	有机酸	Organic acids	有机酸	C15H22O15	3	0.5634	-	106.6	131.02	100.27	3213.79	2855.35	2887.75	1.4157	0.00148813	0.0179847	26.5083	4.72837	up
MW0112356	3,4,5-trihydroxy-6-({3-[(1E)-4-hydroxybut-1-en-1-yl]-1-oxo-1H-isochromen-5-yl}oxy)oxane-2-carboxylic acid	3，4，5-三羟基-6-({3-[（1E)-4-羟基丁-1-烯-1-基]-1-氧代-1H-异色烯-5-基}氧基）氧烷-2-羧酸	Organic acids	有机酸	Organic acids	有机酸	C19H20O10	3	0.5594	-	32700.8	57341.5	24901.4	11787.8	9134.28	27037	1.06183	0.136409	0.279788	0.417239	-1.26105	down
MW0123088	Benzydamine	苄达明	Benzene and substituted derivatives	苯及其衍生物	Benzene and substituted derivatives	苯及其衍生物	C19H23N3O	3	0.5576	-	8897.41	6226.96	9589.63	3762.18	3201.61	4500.21	1.30026	0.0372852	0.116664	0.463867	-1.10822	down
MW0117865	6,7-Dinitro-1,4-dihydroquinoxaline-2,3-dione	6,7-二硝基-1,4-二氢喹喔啉-2,3-二酮	Others	其它类	Ketone compounds	酮类化合物	C8H4N4O6	3	0.5501	-	37352.8	52109	68921.5	5387.13	11194.8	17375.2	1.28052	0.0323973	0.106441	0.214399	-2.22163	down
MW0128656	[3-(3-Hydroxy-4-oxochromen-2-yl)phenyl] hydrogen sulate	[3-(3-羟基-4-氧代-4H-苯并吡喃-2-基）苯基]氧代磺酸	Organic acids	有机酸	Organic acids	有机酸	C15H10O7S	3	0.543	-	8760.79	11489.2	8083.12	134228	148126	154869	1.4129	0.00153452	0.0182191	15.4315	3.94781	up
MW0127683	({6-[(E)-2-methoxyethenyl]-2-oxo-2H-chromen-7-yl}methoxy)sulfonic acid	（{6-[（E)-2-甲氧基乙烯基]-2-氧代-2H-铬-7-基}甲氧基）磺酸	Organic acids	有机酸	Organic acids	有机酸	C13H12O7S	3	0.5394	-	154.95	440.81	24.49	1263.4	2583.91	1283.17	1.1769	0.0656845	0.171833	8.27163	3.04817	up
MW0056439	PA(24:1(15Z)/22:6(4Z,7Z,10Z,13Z,16Z,19Z))	PA(24:1(15Z)/22:6(4Z,7Z,10Z,13Z,16Z,19Z))	GP	甘油磷脂类	PA	磷脂酸	C49H83O8P	3	0.5381	-	8495.67	9281.24	7361.67	17748.3	19907.8	23048.3	1.38167	0.00954957	0.0490065	2.41479	1.2719	up
MW0138100	Eriodictyol 7-(6-galloylglucoside)	圣草酚7-（6-没食子酰葡糖苷）	Flavonoids	黄酮	Flavones	黄酮	C28H26O15	3	0.5336	-	6963.29	6307.17	16542.5	2219.47	3091.46	2637.28	1.25745	0.157693	0.309297	0.266602	-1.90724	down
MW0112398	3,4,5-trihydroxy-6-(5-hydroxy-1-oxo-1H-isochromene-3-carbonyloxy)oxane-2-carboxylic acid	3，4，5-三羟基-6-(5-羟基-1-氧代-1H-异色烯-3-羰氧基）恶烷-2-羧酸	Organic acids	有机酸	Organic acids	有机酸	C16H14O11	3	0.531	-	14066.3	20101.6	21515.3	14771.7	2538.89	6501.5	1.01305	0.078914	0.194872	0.427635	-1.22555	down
MW0010618	Lyoniresinol 9'-sulfate	Lyoniresinol 9'-硫酸盐	Lignans and Coumarins	木脂素和香豆素	Lignans	木脂素	C22H28O11S	3	0.5309	-	20037.6	23409.7	42101.8	11340.9	3977.35	8255.55	1.22699	0.0838039	0.203377	0.275559	-1.85957	down
MW0110945	Hexanoylcholine	己酰胆碱	Others	其它类	Lactones	内酯类化合物	C11H24NO2+	3	0.5277	-	3387.64	4903.92	5216.45	9644.38	12195.9	12639.8	1.34368	0.00578198	0.0371854	2.55256	1.35195	up
MW0108537	n-[4'-Hydroxy-(e)-cinnamoyl]-l-aspartic acid	n-[4'-羟基-（e）-肉桂酰基]-l-天冬氨酸	Amino acids and derivatives	氨基酸及其衍生物	Amino acids and derivatives	氨基酸及其衍生物	C13H13NO6	3	0.5274	-	2053.11	1173.71	822.14	156.51	348.12	459.4	1.2291	0.0994787	0.22743	0.238093	-2.0704	down
MW0131276	3-(3-hydroxyphenyl)-4-[3-(4-hydroxyphenyl)oxiran-2-yl]-2-phenyl-2,3-dihydro-1-benzofuran-6-ol	3-(3-羟苯基)-4-[3-(4-羟苯基）环氧乙烷-2-基]-2-苯基-2，3-二氢-1-苯并呋喃-6-醇	Benzene and substituted derivatives	苯及其衍生物	Benzene and substituted derivatives	苯及其衍生物	C28H22O5	3	0.5265	-	33591	33589.4	38323.5	13108.2	14791.4	13247.6	1.40696	0.00255901	0.02429	0.390007	-1.35843	down
MW0011288	(3S,7E,9S)-9-Hydroxy-4,7-megastigmadien-3-one 9-glucoside	(3S,7E,9S)-9-Hydroxy-4,7-megastigmadien-3-one 9-glucoside	Others	其它类	Ketone compounds	酮类化合物	C19H30O7	3	0.5228	-	21253	23917.4	25169.2	53950.3	49553.3	43518.2	1.38528	0.00720542	0.0415702	2.09017	1.06362	up
MW0129645	1,2-bis(2,4-dihydroxyphenyl)propan-1-one	1，2-双（2，4-二羟基苯基)-1-丙酮	Others	其它类	Ketone compounds	酮类化合物	C15H14O5	3	0.5225	-	3975.35	2433.77	3394.22	8169.47	7531.68	4645.59	1.19875	0.0671544	0.174795	2.07549	1.05345	up
MW0010955	(24E)-15alpha-Acetoxy-3alpha-hydroxy-23-oxo-7,9(11),24-lanostatrien-26-oic acid	(24E)-15alpha-Acetoxy-3alpha-hydroxy-23-oxo-7,9(11),24-lanostatrien-26-oic acid	Organic acids	有机酸	Organic acids	有机酸	C32H46O6	3	0.5181	-	23556.1	23580.8	45190.6	89203.7	140472	98803.3	1.31834	0.0230048	0.0853069	3.55776	1.83097	up
MW0137149	8-[1-(2,4-dihydroxyphenyl)-2-hydroxy-3-(3-hydroxyphenyl)propyl]-2-(4-hydroxy-3-methoxyphenyl)-3,4-dihydro-2H-1-benzopyran-3,5,7-triol	8-[1-(2,4-二羟苯基)-2-羟基-3-(3-羟基苯基）丙基]-2-(4-羟基-3-甲氧基苯基)-3,4-二氢-2H-1-苯并吡喃-3,5,7-三醇	Benzene and substituted derivatives	苯及其衍生物	Benzene and substituted derivatives	苯及其衍生物	C31H30O10	3	0.5124	-	86492	142831	171599	24705	40808.1	46354.7	1.29718	0.0532691	0.148205	0.279026	-1.84153	down
MW0128657	[3-(3-hydroxyphenyl)-3-oxo-1-phenylpropoxy]sulfonic acid	[3-(3-羟基苯基)-3-氧代-1-苯基丙氧基]磺酸	Organic acids	有机酸	Organic acids	有机酸	C15H14O6S	3	0.5028	-	838.8	682.94	1404.09	3668.25	1999.5	5095.52	1.24503	0.0924429	0.21675	3.67871	1.8792	up
MW0061091	1-hexadecanoyl-2-(9Z-hexadecenoyl)-glycero-3-phospho-(1'-sn-glycerol)	PG(16:0/16:1(9Z))	GP	甘油磷脂类	PG	磷脂酰甘油	C38H73O10P	3	0.5022	-	727955	189925	117304	79357.1	34649.2	19883.3	1.15292	0.25852	0.423975	0.129339	-2.95077	down
MEDL02503	Carnitine C16:0	L-棕榈酰肉碱	Alkaloids	生物碱	Alkaloids	生物碱	C23H45NO4	3	0.6709	2364-67-2	18091.2	24159.1	19570.4	64284.4	76196.9	68083.1	1.39927	0.00112864	0.0155475	3.37369	1.75433	up
MW0138675	3''-O-L-Rhamnopyranosylastragalin	3''-OL-Rhamnopyranosylastragalin	Flavonoids	黄酮	Flavones	黄酮	C27H30O15	2	0.9274	28447-29-2	1966.78	1304.55	881.77	119.2	54.62	349.39	1.26361	0.0527052	0.147014	0.125981	-2.98873	down
MW0120699	4-(Hydroxymethyl)pyrimidine	嘧啶-4-基甲醇	Heterocyclic compounds	杂环化合物	Heterocyclic compounds	杂环化合物	C5H6N2O	2	0.8712	33581-98-5	6518.69	4372.88	3763.23	16565.5	21645.6	17652.9	1.36944	0.00396353	0.0295941	3.81199	1.93055	up
MW0126471	8-Demethyl-8-(dimethylamino)riboflavin	玫瑰黄素	Heterocyclic compounds	杂环化合物	Heterocyclic compounds	杂环化合物	C18H23N5O6	2	0.8592	51093-55-1	24694.8	24800.8	21780.4	49194.1	47197.5	51337.9	1.4052	0.000101786	0.0045602	2.07264	1.05147	up
MW0012149	11-Oxoursolic acid acetate	11-氧乙酸	Others	其它类	Lactones	内酯类化合物	C32H48O5	2	0.8582	35959-01-4	14420.7	26961.8	24874.6	48836.7	49299.5	49616.7	1.28322	0.0195033	0.0768233	2.22999	1.15704	up
MW0014589	(+/-)5,6-EET Methyl Ester	5（6)-EET甲酯	Lipids	脂质	Free fatty acids	游离脂肪酸	C21H34O3	2	0.8451	122799-12-6	4.18862e+06	3.0752e+06	2.7443e+06	1.17202e+06	1.33197e+06	1.7931e+06	1.30608	0.0337338	0.109232	0.42936	-1.21974	down
MW0124614	Kahweol	桂月	Heterocyclic compounds	杂环化合物	Heterocyclic compounds	杂环化合物	C20H26O3	2	0.8411	6894-43-5	19216.4	52003.2	26919.8	63541.8	84157.9	91705.8	1.19073	0.0232676	0.0858603	2.43944	1.28655	up
MW0114927	Metamfepramone	安非他酮	Benzene and substituted derivatives	苯及其衍生物	Benzene and substituted derivatives	苯及其衍生物	C11H15NO	2	0.8258	15351-09-4	12356.6	13191.8	13622.7	5220.01	4440.23	5033.18	1.40852	0.000161003	0.00604957	0.375109	-1.41462	down
MW0105602	Amastatin	氨甲蝶呤	Amino acids and derivatives	氨基酸及其衍生物	Amino acids and derivatives	氨基酸及其衍生物	C21H38N4O8	2	0.8222	67655-94-1	61130.9	57354.3	64590.5	141777	146774	132460	1.40934	0.000509295	0.0106548	2.29965	1.20142	up
MW0012312	9s,13r-12-Oxophytodienoic Acid	9s,13r-12-氧代植物二烯酸	Lipids	脂质	Free fatty acids	游离脂肪酸	C18H28O3	2	0.8134	71606-07-0 | 67204-66-4	372653	422661	421824	1.18563e+06	1.21618e+06	2.55201e+06	1.32469	0.10949	0.240508	4.07006	2.02505	up
MW0107173	Glycyl-l-histidyl-l-lysine	甘氨酰-组氨酰-L-赖氨酸	Amino acids and derivatives	氨基酸及其衍生物	Amino acids and derivatives	氨基酸及其衍生物	C14H24N6O4	2	0.8073	49557-75-7	4970.61	5997.08	7411.4	10852.6	10770.6	19676.4	1.22034	0.115645	0.249397	2.2471	1.16806	up
MW0109322	Prolyl-leucyl-glycine	Pro Leu Gly	Amino acids and derivatives	氨基酸及其衍生物	Amino acids and derivatives	氨基酸及其衍生物	C13H23N3O4	2	0.7878	33676-42-5	5840.63	6089.3	9187.29	1930.67	1642.86	1030.68	1.35457	0.0301904	0.101762	0.218031	-2.19739	down
MW0052336	Diethyl fumarate	富马酸二乙酯	Others	其它类	Lactones	内酯类化合物	C8H12O4	2	0.7835	623-91-6 | 26298-06-6	62702.1	62970.7	60226.5	128805	124282	137919	1.41195	0.0023919	0.0233516	2.10332	1.07267	up
MW0137994	Dimethylfraxetin	白蜡树素；6,7,8-三甲氧基香豆素	Lignans and Coumarins	木脂素和香豆素	Coumarins	香豆素	C12H12O5	2	0.7817	6035-49-0	112239	112945	117631	53616.2	54304.4	53955.7	1.41665	0.000678815	0.012468	0.472198	-1.08254	down
MW0000215	Deacetylvindoline	去乙酰文多灵碱	Alkaloids	生物碱	Plumerane	吲哚类生物碱	C23H30N2O5	2	0.7808	3633-92-9	88047.2	60128.8	88556.4	30381.7	45490.8	29746.6	1.28559	0.0249371	0.0896799	0.446154	-1.16439	down
MW0150595	Gly-Pro-Glu	甘氨酸-脯氨酸-谷氨酸	Amino acids and derivatives	氨基酸及其衍生物	Amino acids and derivatives	氨基酸及其衍生物	C12H19N3O6	2	0.7678	32302-76-4	30709.8	35312.7	34722.3	18442.4	14545.9	16196	1.38294	0.000945847	0.014233	0.488206	-1.03444	down
MW0000200	Crinamin	文殊兰胺	Alkaloids	生物碱	Isoquinoline alkaloids	异喹啉类生物碱	C17H19NO4	2	0.767	639-41-8	63202.6	53779	68872.7	17274.1	32198.4	12149.1	1.26897	0.00661963	0.0398682	0.331559	-1.59266	down
MW0138292	Glycitin	黄豆黄苷	Flavonoids	黄酮	Isoflavones	异黄酮	C22H22O10	2	0.7666	40246-10-4	59371.4	127580	92562.7	35309	54030.4	35339.3	1.1755	0.109014	0.240138	0.446056	-1.1647	down
MW0115996	(6R)-5-Methyltetrahydrofolic acid	(6R)-5-甲基四氢叶酸	Organic acids	有机酸	Organic acids	有机酸	C20H25N7O6	2	0.7657	31690-09-2	37780.2	51377.5	56377.5	24219.5	27584.9	18818.8	1.28925	0.0300542	0.101355	0.485265	-1.04315	down
MW0105376	7-Aminodesacetoxycephalosporanic acid	7-氨基乙酰氧基头孢菌酸	Organic acids	有机酸	Organic acids	有机酸	C8H10N2O3S	2	0.7634	22252-43-3 | 70287-30-8	227.54	322.33	272.33	23141.9	23566.4	24617.2	1.41628	0.000331678	0.00855783	86.7496	6.43878	up
MW0108842	N-Methyl-L-histidine	N-甲基组氨酸	Amino acids and derivatives	氨基酸及其衍生物	Amino acids and derivatives	氨基酸及其衍生物	C7H11N3O2	2	0.7625	24886-03-1	966.27	1924.35	1422.8	5044.37	6542.12	4915.83	1.35046	0.00602367	0.0378717	3.82581	1.93576	up
MW0150509	Gly-Trp-Trp	甘氨酸-色氨酸-色氨酸	Amino acids and derivatives	氨基酸及其衍生物	Amino acids and derivatives	氨基酸及其衍生物	C24H25N5O4	2	0.7609	57850-28-9	2773	2998.15	4119.94	16987.2	9783.71	14931	1.36189	0.0344108	0.110543	4.21611	2.07591	up
MW0053624	Ginsenoside Rg3	20(S)-人参皂苷 Rg3	Terpenoids	萜类	Triterpene Saponin	三萜皂苷	C42H72O13	2	0.7589	14197-60-5 | 11019-45-7	1020.4	1458.09	1642.99	3533.32	2403.1	2846.22	1.28015	0.0236136	0.0866474	2.13094	1.09149	up
MW0011871	1,2-Dihexanoyl-sn-glycerol	1,2-二己酰基-sn-甘油	GL	甘油脂类	DG	甘油二酯	C15H28O5	2	0.758	30403-47-5	160892	166568	166986	63701.6	60607.3	64083	1.41644	1.57259e-05	0.00224386	0.381017	-1.39207	down
MW0168654	7(S),17(S)-dihydroxy-8(E),10(Z),13(Z),15(E),19(Z)-Docosapentaenoic Acid	7(S),17(S)-二羟基-8(E),10(Z),13(Z),15(E),19(Z)-二十二碳五烯酸	FA	脂肪酰类	Others	其它	C22H34O4	2	0.7555	887752-13-8	4012.56	21813.8	3194.72	53596.4	48245.8	49585	1.21899	0.0163263	0.0684963	5.21783	2.38345	up
MW0157910	Thr-Ser-Lys	苏氨酸-丝氨酸-赖氨酸	Amino acids and derivatives	氨基酸及其衍生物	Amino acids and derivatives	氨基酸及其衍生物	C13H26N4O6	2	0.7547	71730-64-8	39198.9	41583.3	40364.3	15566.5	17804.7	16966.5	1.41107	1.5869e-05	0.00224386	0.41551	-1.26705	down
MW0107996	Lys-Cys	L-赖氨酸-L-半胱氨酸	Amino acids and derivatives	氨基酸及其衍生物	Amino acids and derivatives	氨基酸及其衍生物	C9H19N3O3S1	2	0.7507	106325-92-2	149831	143753	155598	368250	384317	425428	1.41057	0.00369274	0.0285601	2.62253	1.39096	up
MW0129933	1-O-trans-Cinnamoyl-beta-D-glucopyranose	1-O-反式肉桂酰基-β-D-吡喃葡萄糖	Phenolic acids	酚酸类	Phenolic acids	酚酸类	C15H18O7	2	0.7474	40004-96-4	205782	177368	385138	122554	100473	120976	1.18497	0.160205	0.312621	0.447752	-1.15923	down
MW0158243	Trp-Ser-Phe	色氨酸-丝氨酸-苯丙氨酸	Amino acids and derivatives	氨基酸及其衍生物	Amino acids and derivatives	氨基酸及其衍生物	C23H26N4O5	2	0.7467	105394-87-4	30246.7	34515.3	39407.3	97105.2	86979.4	92275.2	1.39783	0.000138098	0.00548122	2.65299	1.40762	up
MW0116094	1,2,3,6-Tetrahydro-1-nitroso-2,3'-bipyridine	1,2,3,6-四氢-1-亚硝基-2,3'-联吡啶	Alkaloids	生物碱	Pyridine alkaloids	吡啶类生物碱	C10H11N3O	2	0.7452	71267-22-6	59475.3	59355.9	60813.8	20156.5	30394.6	35157.2	1.30006	0.0184825	0.0744106	0.477098	-1.06764	down
MW0122604	8-Deoxylactucin	8-去氧山莴苣素	Terpenoids	萜类	Sesquiterpenoids	倍半萜	C15H16O4	2	0.7444	65725-10-2	17235.7	7506.98	16896.5	22841.8	38797.4	41076.5	1.15761	0.0503163	0.142957	2.46681	1.30265	up
MW0153221	Lys-Gln-Ala-Gly-Asp-Val	Lys-Gln-Ala-Gly-Asp-Val	Amino acids and derivatives	氨基酸及其衍生物	Amino acids and derivatives	氨基酸及其衍生物	C25H44N8O10	2	0.7415	80755-87-9	14275.6	13413.7	7616.73	35330.9	30482	30312.4	1.3177	0.0019721	0.0206483	2.72264	1.445	up
MW0116099	(Z)-1-(3-Ethyl-5-methoxy-2,3-dihydrobenzothiazol-2-ylidene)propan-2-one	TG003	Benzene and substituted derivatives	苯及其衍生物	Benzene and substituted derivatives	苯及其衍生物	C13H15NO2S	2	0.7389	300801-52-9 | 719277-26-6	48490.7	50203.1	54702.4	22818.5	22044.9	25212.5	1.40472	0.000927479	0.0141522	0.45683	-1.13027	down
MW0114742	Linustatin	亚麻氰苷	Alkaloids	生物碱	Alkaloids	生物碱	C16H27NO11	2	0.7263	72229-40-4	217519	249007	240983	666075	701287	698049	1.41301	8.63843e-06	0.00170203	2.91927	1.54561	up
MW0152664	L-Histidine beta-naphthylamide	L-组氨酸 β-萘酰胺	Alkaloids	生物碱	Plumerane	吲哚类生物碱	C16H16N4O	2	0.7214	7424-15-9	306377	223264	120317	118721	107180	34966.3	1.01024	0.121961	0.25864	0.401361	-1.31703	down
MW0115168	Primin	普里明	Others	其它类	Ketone compounds	酮类化合物	C12H16O3	2	0.7207	15121-94-5	1296.48	1290.24	1822.72	12273.1	12776	12873.6	1.40972	1.71005e-06	0.00123542	8.60033	3.10439	up
MW0108019	Lys-Pro-Val	L-赖氨酸-L-脯氨酸-L-缬氨酸	Amino acids and derivatives	氨基酸及其衍生物	Amino acids and derivatives	氨基酸及其衍生物	C16H30N4O4	2	0.7163	67727-97-3	10701.8	9612.13	9533.82	5803.01	3896.57	4465.4	1.34894	0.00263273	0.0247013	0.474575	-1.07529	down
MW0155976	Pro-Pro-Gly	脯氨酰-脯氨酰-甘氨酸	Amino acids and derivatives	氨基酸及其衍生物	Amino acids and derivatives	氨基酸及其衍生物	C12H19N3O4	2	0.7082	16875-10-8	401805	460347	436826	862386	958429	829459	1.39905	0.00259052	0.0243756	2.04028	1.02876	up
MW0115745	Cannabichromene	大麻色原烯	Others	其它类	Others	其它	C21H30O2	2	0.7001	20675-51-8 | 18793-28-7	65728.5	53030.9	57113.6	21646.2	18799.8	22814.6	1.39839	0.00574871	0.0370447	0.359695	-1.47515	down
MW0115021	Nigericin	尼日利亚菌素	Heterocyclic compounds	杂环化合物	Heterocyclic compounds	杂环化合物	C40H68O11	3	0.9944	28380-24-7	16229.4	12412.9	19498.3	30103.5	41390.3	39951.4	1.3205	0.0120717	0.0563902	2.315	1.21101	up
MW0001574	Nodinitib-1	Nodinitib-1	Benzene and substituted derivatives	苯及其衍生物	Benzene and substituted derivatives	苯及其衍生物	C14H13N3O2S	3	0.9906	799264-47-4	1894.71	1043.22	855.44	527.34	479.23	255.27	1.21191	0.110358	0.241813	0.332644	-1.58795	down
MW0156432	Rosmarinine	迷迭香碱；1，2-二氢-2，12-二羟基-(1α，2α)-千里光烷-11，16-二酮	Others	其它类	Ketone compounds	酮类化合物	C18H27NO6	3	0.99	520-65-0	66904.4	95339.4	65070.5	31449.4	32236	18436.3	1.30436	0.0238035	0.0869985	0.361269	-1.46885	down
MW0001634	1-Methoxy-4-(phenylsulfonyl)benzene	1-甲氧基-4-(苯磺酰基)苯	Benzene and substituted derivatives	苯及其衍生物	Benzene and substituted derivatives	苯及其衍生物	C13H12O3S	3	0.9825	3112-84-3	407.48	163.42	635.9	1295.05	1399.01	1672.33	1.23051	0.00446245	0.0316671	3.61816	1.85525	up
MW0001670	1-Nitro-3-(4-nitrophenoxy)benzene	1-硝基-3-(4-硝基苯氧基)苯	Benzene and substituted derivatives	苯及其衍生物	Benzene and substituted derivatives	苯及其衍生物	C12H8N2O5	3	0.9593	2914-72-9	1091.7	1091.7	1091.7	15315.9	18141.5	16140.4	1.41684	0.00293889	0.0260866	15.1439	3.92066	up
MW0002730	2-Aminobenzenecarbothioamide	2-氨基苯硫代酰胺	Benzene and substituted derivatives	苯及其衍生物	Benzene and substituted derivatives	苯及其衍生物	C7H8N2S	3	0.9513	2454-39-9	555696	596576	584402	151762	154098	157944	1.41686	0.000645624	0.0122386	0.267064	-1.90474	down
MW0001807	2-Thiophen-2-yl-2,3-dihydro-1H-perimidine	2-Thiophen-2-yl-2,3-dihydro-1H-perimidine	Benzene and substituted derivatives	苯及其衍生物	Benzene and substituted derivatives	苯及其衍生物	C15H12N2S	3	0.9479	6584-40-3 | 5664-78-8	34529.5	47579.9	63567.3	14911.1	11142.5	25121.3	1.24201	0.0452752	0.132903	0.35129	-1.50926	down
MEDP1310	4-Hydroxy-l-tryptophan	4-羟基-L-色氨酸	Amino acids and derivatives	氨基酸及其衍生物	Amino acids and derivatives	氨基酸及其衍生物	C11H12N2O3	3	0.9177	25242-90-4	1600.49	9062.9	5032.16	10663	16327.2	16902.7	1.07437	0.0331225	0.107951	2.79652	1.48363	up
MW0147484	[(1'S,3'R,4'R,5'R,6'R,10'S,12'S,16'R,18'S,21'R)-2-hydroxy-1,4',6',12',17',17'-hexamethyl-18'-[(2S,3R,4S,5R)-3,4,5-trihydroxyoxan-2-yl]oxyspiro[3,6-dioxabicyclo[3.1.0]hexane-4,8'-9-oxahexacyclo[11.9.0.01,21.04,12.05,10.016,21]docos-13-ene]-3'-yl] acetate	升麻苷	Heterocyclic compounds	杂环化合物	Heterocyclic compounds	杂环化合物	C37H54O11	3	0.9119	66176-93-0	1398.03	38097.5	657.59	44280.6	48579.2	31026.5	1.00464	0.139182	0.283687	3.08535	1.62543	up
MW0154497	Nifuradene	硝呋喃	Others	其它类	Ketone compounds	酮类化合物	C8H8N4O4	3	0.9117	555-84-0	205780	190093	167467	76135.6	69324.5	57765.8	1.39081	0.00272619	0.0250717	0.360752	-1.47092	down
MW0157291	Sulfazecin	磺胺嘧啶	Amino acids and derivatives	氨基酸及其衍生物	Amino acids and derivatives	氨基酸及其衍生物	C12H20N4O9S	3	0.8943	77912-79-9	276.23	216.58	220.81	676.81	2296.8	1070.22	1.29194	0.150457	0.299532	5.66664	2.50249	up
MW0010239	Colchicine	秋水仙碱	Alkaloids	生物碱	Alkaloids	生物碱	C22H25NO6	3	0.8874	64-86-8 | 30512-31-3	24558.3	28469	28655.1	92810.8	86732.5	97247.3	1.41081	0.000503797	0.0106009	3.38862	1.7607	up
MW0144234	Ac-Asp-Glu-Val-Asp-pNA	Ac-Asp-Glu-Val-Asp-pNA	Benzene and substituted derivatives	苯及其衍生物	Benzene and substituted derivatives	苯及其衍生物	C26H34N6O13	3	0.8835	189950-66-1	29071.9	35662.5	32073	83884.9	95720.1	95653.3	1.40397	0.00103937	0.014943	2.84336	1.5076	up
MW0012303	9-Dihydro-13-acetylbaccatin III	13-乙酰基-9-二氢浆果赤霉素	Terpenoids	萜类	Ditepenoids	二萜	C33H42O12	3	0.875	142203-65-4	5481.38	5527.38	5519.75	17869.9	10948.6	11553.8	1.33494	0.0695383	0.179278	2.44259	1.28841	up
MW0146867	Brevicolline	布雷维科林	Alkaloids	生物碱	Alkaloids	生物碱	C17H19N3	3	0.8692	20069-02-7	213315	241210	235173	82949.8	75419.2	77910	1.41248	0.00185684	0.01999	0.342584	-1.54547	down
MW0118134	1,3-Bis(1H-benzo[d]imidazol-2-yl)propane	1,3-双(1H-苯并[d]咪唑-2-基)丙烷	Benzene and substituted derivatives	苯及其衍生物	Benzene and substituted derivatives	苯及其衍生物	C17H16N4	3	0.8657	7147-66-2	3817.06	4045.32	4022.92	1366.14	1843.13	2182.98	1.34149	0.00740236	0.0422413	0.453691	-1.14022	down
MW0147869	Cucurbitacin P	葫芦素P	Others	其它类	Ketone compounds	酮类化合物	C30H48O7	3	0.8586	25383-26-0	15575.2	15278.5	10020.2	32626	34105.1	20652.2	1.23194	0.0515232	0.144898	2.13788	1.09618	up
MW0127218	2-(Phenylthio)benzoic acid	2-(苯硫基)苯甲酸	Organic acids	有机酸	Organic acids	有机酸	C13H10O2S	3	0.8502	1527-12-4	468.88	3394.45	754.56	4608.6	6074.56	5201.69	1.13273	0.0392803	0.120757	3.43985	1.78235	up
MW0144376	Adiantifoline	阿地安托林	Alkaloids	生物碱	Alkaloids	生物碱	C42H50N2O9	3	0.8302	20823-96-5	68489.1	67084.1	69857.8	151183	162009	149109	1.4144	0.00154748	0.0183273	2.2504	1.17018	up
MEDP1127	1-Acetylindole	1-乙酰吲哚	Alkaloids	生物碱	Plumerane	吲哚类生物碱	C10H9NO	3	0.798	576-15-8	6876.53	5113.28	8192.59	34147.4	40628.9	43967	1.3964	0.00438314	0.031456	5.8835	2.55668	up
MEDP1962	IAA-L-Ala	N-(3-吲哚乙酰基)-L-丙氨酸	Amino acids and derivatives	氨基酸及其衍生物	Amino acids and derivatives	氨基酸及其衍生物	C13H14N2O3	3	0.7969	57105-39-2	4399.68	4363.93	10459.3	30310.6	32592.6	25837.2	1.32986	0.00122314	0.0161706	4.61638	2.20676	up
MW0141142	1,3,6,8-Tetrahydroxynaphthalene	1,3,6,8-萘基萘; 1,3,6,8-四羟基萘	Benzene and substituted derivatives	苯及其衍生物	Benzene and substituted derivatives	苯及其衍生物	C10H8O4	3	0.7801	18512-30-6	744567	170063	738751	75416.1	81763.1	78994.2	1.2366	0.131363	0.272361	0.142843	-2.8075	down
MW0146549	Bayogenin 3-O-cellobioside	Bayogenin?3-O-纤维二糖苷	Organic acids	有机酸	Organic acids	有机酸	C42H68O15	3	0.7726	92622-05-4	73777.5	65859.9	135367	201542	221274	199555	1.25723	0.0255001	0.0907752	2.26313	1.17832	up
MW0144882	Allatostatin IV	Allatostatin IV	Amino acids and derivatives	氨基酸及其衍生物	Amino acids and derivatives	氨基酸及其衍生物	C45H68N12O12	3	0.7686	123338-13-6	4265.88	4166.28	4220.37	16328.2	13767.9	16473	1.41195	0.00594249	0.0376589	3.68061	1.87995	up
MW0156203	Pterosterone	蝶甾酮	Steroids	甾体	Steroid	甾体	C27H44O7	3	0.7628	18089-44-6	227288	268714	401519	314753	1.05135e+06	956925	1.00702	0.171151	0.326245	2.58827	1.37199	up
MW0148557	(Carboxymethyl)(dimethyl)sulfonium	乙酸二甲酯	Others	其它类	Lactones	内酯类化合物	C4H9O2S+	3	0.7625	24220-08-4	144345	134938	138179	68277.1	65897.4	67151.5	1.41514	0.000828739	0.0135049	0.482262	-1.05211	down
MW0157198	Stachyose hydrate	水苏糖四水合物	Others	其它类	Saccharides	糖类	C24H50O25	3	0.756	10094-58-3 | 54261-98-2 | 470-55-3	2166.8	1038.41	551.8	2997.17	5336.46	3993.91	1.18767	0.0310008	0.10358	3.28121	1.71423	up
MW0157322	Syrosingopine	昔洛舍平;乙酯利血平<降压药>	Alkaloids	生物碱	Plumerane	吲哚类生物碱	C35H42N2O11	3	0.7518	84-36-6	49043.8	42013.7	54487.5	24837.8	13444.8	29493.4	1.20727	0.0143518	0.0634369	0.46567	-1.10262	down
MW0118662	2-Mercapto-5-benzimidazolecarboxylic acid	2-巯基-5-苯并咪唑羧酸	Organic acids	有机酸	Organic acids	有机酸	C8H6N2O2S	3	0.7499	58089-25-1	244.42	169.37	113.31	1951.38	3333.17	6525.5	1.36796	0.108802	0.239965	22.4057	4.48579	up
MW0002734	2-Benzoylbenzoic acid	2-苯甲酰基苯甲酸	Benzene and substituted derivatives	苯及其衍生物	Benzene and substituted derivatives	苯及其衍生物	C14H10O3	3	0.7496	85-52-9 | 27458-06-6	155.38	836.66	218.4	7123.67	5152.91	4148	1.32728	0.0230258	0.0853069	13.5691	3.76225	up
MW0154737	omega-Carboxy-N-acetyl-LTE4	omega-羧基-N-乙酰基-LTE4	Organic acids	有机酸	Organic acids	有机酸	C25H37NO8S	3	0.7494	112066-58-7	6834.15	11281.9	6323.75	3661.72	3508.95	2143.09	1.25672	0.0743862	0.187175	0.38109	-1.3918	down
MW0153752	1alphaH,5alphaH-Tropane-3alpha,6beta,7beta-triol, 3-(2-methylcrotonate), (E)-	曼陀罗碱	Alkaloids	生物碱	Tropan alkaloids	莨菪烷类生物碱	C13H21NO4	3	0.7464	526-13-6	825.37	475.16	831.94	368.12	350.8	173.13	1.16913	0.0523576	0.146421	0.418318	-1.25733	down
MW0002411	2,6-Dinitrobenzoic acid	2,6-二硝基苯甲酸	Benzene and substituted derivatives	苯及其衍生物	Benzene and substituted derivatives	苯及其衍生物	C7H4N2O6	3	0.746	603-12-3	119168	120635	108157	42914.3	82285.4	36178.6	1.21161	0.0414118	0.124773	0.463785	-1.10847	down
ZINC15262412	Gnetupendin A	Gnetupendin A	Others	其它类	Stilbene	茋类	C22H20O5	3	0.7454	382137-56-6	1271.04	1252.37	1260.09	300.43	220.78	515.46	1.33201	0.00891448	0.0471235	0.273998	-1.86776	down
MW0008628	n-(2-Naphthyl)biphenyl-4-amine	n-(2-萘基)联苯-4-胺	Benzene and substituted derivatives	苯及其衍生物	Benzene and substituted derivatives	苯及其衍生物	C22H17N	3	0.7438	6336-92-1	13819.7	10359.9	13036.6	45427.5	28779.7	26796.4	1.32388	0.0651218	0.171011	2.71397	1.4404	up
MW0004336	4-(5-Amino-1,3,4-thiadiazol-2-yl)benzoic acid	4-(5-Amino-1,3,4-thiadiazol-2-yl)苯甲酸	Benzene and substituted derivatives	苯及其衍生物	Benzene and substituted derivatives	苯及其衍生物	C9H7N3O2S	3	0.7436	235109-65-6	780.12	1104.41	897.4	96.92	73.58	441.53	1.20684	0.0100652	0.0504967	0.220002	-2.18441	down
MW0139063	N-(4,7-Dihydroxy-8-methyl-2-oxo-2H-chromen-3-yl)-2,2-dimethylchromane-6-carboxamide	N-(4,7-二羟基-8-甲基-2-氧代-2H-铬-3-基)-2,2-二甲基铬烷-6-羧酰胺	Alcohol and amines	醇、胺类	Amines	胺类	C22H21NO6	3	0.743	31589-45-4	26334.1	20610	14772.7	9049.18	9218.26	10789.5	1.27565	0.078754	0.194551	0.470812	-1.08678	down
MW0122348	7-Amino-2-methylpyrazolo[1,5-a]pyrimidine-6-carbonitrile	7-氨基-2-甲基吡唑并[1,5-a]嘧啶-6-甲腈	Heterocyclic compounds	杂环化合物	Heterocyclic compounds	杂环化合物	C8H7N5	3	0.741	255389-59-4	1935.21	2304.96	2707.8	1336.86	952.73	716.9	1.28061	0.011271	0.0539114	0.432715	-1.20851	down
MW0006231	Diphenylmethanol	二苯甲醇	Benzene and substituted derivatives	苯及其衍生物	Benzene and substituted derivatives	苯及其衍生物	C13H12O	3	0.7386	91-01-0	1123.86	2897.03	767.52	582.61	638.91	206.55	1.04123	0.227871	0.390722	0.298235	-1.74548	down
MW0115750	N-Acetyl-3,4-methylenedioxyamphetamine	N-Acetyl-3,4-亚甲二氧苯丙胺	Alcohol and amines	醇、胺类	Amines	胺类	C12H15NO3	3	0.7381	36209-71-9	4165.4	3643.17	4207.31	1462.7	2562.13	1236.09	1.2601	0.0185295	0.0744671	0.437831	-1.19156	down
MW0013336	26-Deoxyactein	26-脱氧肌动蛋白	Terpenoids	萜类	Triterpene	三萜	C37H56O10	3	0.737	264624-38-6	5608.76	4529.49	7694.45	1973.68	981.66	3383.48	1.16807	0.0334976	0.108785	0.35546	-1.49224	down
MW0111913	2-(Methylsulfanyl)-1-phenylethan-1-one	2-(甲硫基)-1-苯乙烷-1-酮	Others	其它类	Ketone compounds	酮类化合物	C9H10OS	3	0.7355	5398-93-6	7316.93	3314.32	3040.84	9046.73	9338.07	11063	1.17467	0.0452322	0.132896	2.15386	1.10692	up
MW0144272	Acetylgitaloxin	乙酰苦参	Steroids	甾体	Steroid	甾体	C44H66O16	3	0.7316	7263-26-5	828.5	2317.87	1499.92	5571.11	4486.26	2262.15	1.10013	0.103424	0.231874	2.65147	1.40679	up
MW0006269	Obscurolide A1	暗黑内酯A1	Benzene and substituted derivatives	苯及其衍生物	Benzene and substituted derivatives	苯及其衍生物	C15H17NO5	3	0.73	144397-99-9	31467.4	86226	30220.8	22154.5	20932.2	22488.8	1.00254	0.275463	0.443507	0.443334	-1.17353	down
MW0116905	(2R)-2-({9-(1-methylethyl)-6-[(4-pyridin-2-ylbenzyl)amino]-9H-purin-2-yl}amino)butan-1-ol	(2R)-2-({9-(1-甲基乙基)-6-[(4-吡啶-2-基苄基)氨基]-9H-嘌呤-2-基}氨基)丁-1-醇	Alkaloids	生物碱	Pyridine alkaloids	吡啶类生物碱	C24H29N7O	3	0.7296	294646-77-8	39094.7	28929.4	23125.2	17028.6	11665.6	12490.4	1.27398	0.0570557	0.155461	0.451837	-1.14612	down
MW0116786	1-[4-(Acetylamino)phenyl]-5-oxopyrrolidine-3-carboxylic acid	1-[4-(乙酰氨基)苯基]-5-氧代吡咯烷-3-羧酸	Organic acids	有机酸	Organic acids	有机酸	C13H14N2O4	3	0.7282	133749-16-3	99230.7	89858.4	195461	40341.8	40695.9	46784.7	1.27939	0.126098	0.264581	0.332395	-1.58903	down
MW0141210	Docetaxal	多烯紫杉醇	Alcohol and amines	醇、胺类	Alcohols	醇类	C45H55NO15	3	0.7262	125354-16-7	286.6	766.62	1036.18	1832.11	2867.66	1935	1.18727	0.024038	0.0874462	3.17544	1.66696	up
MW0125685	N-butyl-1-phenyl-1H-pyrazolo[3,4-d]pyrimidin-4-amine	N-丁基-1-苯基-1H-吡唑并[3,4-d]嘧啶-4-胺	Alcohol and amines	醇、胺类	Amines	胺类	C15H17N5	3	0.7259	68380-52-9	4914.25	5931.99	5718.32	2579.44	1098.09	2307.81	1.26447	0.0046547	0.0325429	0.361334	-1.46859	down
MW0012799	Napellonine	一枝蒿庚素; 准葛尔乌头碱	Alkaloids	生物碱	Terpenoid alkaloids	萜类生物碱	C22H31NO3	3	0.7248	509-24-0	11313.1	11185.3	11465.1	3393.79	4897.53	4166.75	1.38747	0.00281361	0.0256109	0.366807	-1.44691	down
MW0151860	Isoprothiolane sulfoxide	异丙硫醇亚砜	Organic acids	有机酸	Organic acids	有机酸	C12H18O5S2	3	0.7236	52303-69-2	12325.8	11741.1	5227.55	6320.42	1396.48	1531.59	1.08644	0.0818414	0.20005	0.315709	-1.66333	down
MW0118667	2-Mercaptonicotinonitrile	2-巯基烟腈	Heterocyclic compounds	杂环化合物	Heterocyclic compounds	杂环化合物	C6H4N2S	3	0.7186	52505-45-0	9836.07	17026.8	18719.9	6936.85	4537.73	4590.5	1.28025	0.0590613	0.15875	0.352438	-1.50456	down
MW0052328	N,N-Didesmethylmifepristone	N,N-二去甲基米非司酮	Others	其它类	Ketone compounds	酮类化合物	C27H31NO2	3	0.7186	104004-92-4	5630.49	7264.61	8576.56	3102.5	3133.85	2426.3	1.34668	0.0304714	0.102284	0.403446	-1.30955	down
MW0009479	Piperidolate	哌啶醇	Benzene and substituted derivatives	苯及其衍生物	Benzene and substituted derivatives	苯及其衍生物	C21H25NO2	3	0.718	82-98-4	3576.33	3670.56	2646.97	255.41	1272.23	858.22	1.20748	0.00487488	0.0333998	0.241146	-2.05202	down
MW0141403	[(1S,2R,3R,4S,5S,6S,8R,9S,10S,13S,16S,17R,18S)-11-ethyl-4,8,9-trihydroxy-6,16,18-trimethoxy-11-azahexacyclo[7.7.2.12,5.01,10.03,8.013,17]nonadecan-13-yl]methyl 2-[(3S)-3-methyl-2,5-dioxopyrrolidin-1-yl]benzoate	[(1S,2R,3R,4S,5S,6S,8R,9S,10S,13S,16S,17R,18S)-11-ethyl-4,8,9-trihydroxy-6,16,18-trimethoxy-11-azahexacyclo[7.7.2.12,5.01,10.03,8.013,17]nonadecan-13-yl]methyl 2-[(3S)-3-methyl-2,5-dioxopyrrolidin-1-yl]benzoate	Benzene and substituted derivatives	苯及其衍生物	Benzene and substituted derivatives	苯及其衍生物	C36H48N2O10	3	0.7179	119347-24-9	41580.6	39628.7	48227.3	97208.7	88415.7	85168.2	1.39227	0.000717827	0.0126829	2.09209	1.06494	up
MW0118739	2-Methyl-4-phenylthiazole	2-甲基-4-苯基噻唑	Heterocyclic compounds	杂环化合物	Heterocyclic compounds	杂环化合物	C10H9NS	3	0.7156	1826-16-0	17810.7	26239	21878.9	57844.4	43420.7	49107.8	1.34381	0.00842425	0.0454937	2.28084	1.18957	up
MW0001354	1,4-Anthraquinone	1,4-蒽醌	Benzene and substituted derivatives	苯及其衍生物	Benzene and substituted derivatives	苯及其衍生物	C14H8O2	3	0.7156	635-12-1	9812.23	244.78	11386.8	112982	104448	156455	1.17179	0.0149494	0.0651044	17.4356	4.12396	up
MW0000577	Aconiazide	附子	Benzene and substituted derivatives	苯及其衍生物	Benzene and substituted derivatives	苯及其衍生物	C15H13N3O4	3	0.7135	13410-86-1	6019.32	3705.57	7660.85	14265.2	20439.8	9271.66	1.17279	0.0980465	0.225414	2.52947	1.33883	up
MW0132544	3',4',6-TRIMETHOXYISOFLAVONE-7-O-beta-D-GLUCOPYRANOSIDE	3',4',6-三甲氧基异黄酮-7-O-β-D-吡喃葡萄糖苷	Flavonoids	黄酮	Flavones	黄酮	C24H26O11	3	0.7098	59183-50-5	74300.5	66466.1	49252.6	21165.5	16525.5	50036.6	1.09924	0.0631813	0.167355	0.461678	-1.11504	down
MW0123703	Dimethyl 4-(3-methoxyphenyl)-1,4-dihydropyridine-3,5-dicarboxylate	4-(3-甲氧基苯基)-1,4-二氢吡啶-3,5-二羧酸二甲酯	Others	其它类	Lactones	内酯类化合物	C16H17NO5	3	0.7097	6370-12-3	14064.8	13326	11580.1	26628.1	27282.3	25899.5	1.39875	0.000434722	0.00991777	2.04794	1.03417	up
MW0003323	2-Phenyl-1,2,4-triazaspiro[4.5]dec-3-ene-3-thiol	2-Phenyl-1,2,4-triazaspiro[4.5]dec-3-ene-3-thiol	Benzene and substituted derivatives	苯及其衍生物	Benzene and substituted derivatives	苯及其衍生物	C13H17N3S	3	0.7092	39263-81-5	9147.64	8873.85	11055.2	49587.8	42432.6	44810.2	1.40973	0.00157558	0.0184755	4.70586	2.23446	up
MW0106597	Epalrestat	依帕司他	Benzene and substituted derivatives	苯及其衍生物	Benzene and substituted derivatives	苯及其衍生物	C15H13NO3S2	3	0.709	82159-09-9	2311.55	3630.08	2202.33	264.15	165.62	588.11	1.331	0.0281047	0.0967372	0.124986	-3.00016	down
MW0114411	(9S)-9-Amino-9-deoxoerythromycin	(9S)-9-氨基-9-脱氧红霉素	Alcohol and amines	醇、胺类	Amines	胺类	C37H70N2O12	3	0.7081	26116-56-3	734459	98022.5	252071	36505	28892.7	123745	1.05653	0.258148	0.423645	0.174397	-2.51955	down
MW0148472	Diginatin	Diginatigenin3-O-tridigitoxoside	Steroids	甾体	Steroid	甾体	C41H64O15	3	0.7071	52589-12-5	23248.8	75643.5	45214.1	188919	131309	138190	1.22948	0.0122931	0.0572154	3.18111	1.66953	up
MW0104062	[1-(4-Hydroxyphenoxy)-1-phosphonoethyl]phosphonic acid	[1-(4-羟基苯氧基)-1-膦酰基乙基]膦酸	Organic acids	有机酸	Organic acids	有机酸	C8H12O8P2	3	0.7057	142523-38-4	75.3	218.14	43.34	724.63	1090.57	1243.28	1.30916	0.0186011	0.0745443	9.08154	3.18294	up
MW0147460	3,4-DI-1H-Indol-3-YL-1H-pyrrole-2,5-dicarboxylic acid	3,4-DI-1H-Indol-3-YL-1H-pyrrole-2,5-二羧酸	Organic acids	有机酸	Organic acids	有机酸	C22H15N3O4	3	0.7056	150044-68-1	852.86	993.53	395.7	2716.19	3191.97	2447.17	1.30427	0.00223661	0.0224388	3.72658	1.89785	up
MW0117846	1,2,3,4-Tetrahydro-2,3-dioxoquinoxaline-6-carboxylic acid	1,2,3,4-四氢-2,3-二氧喹喔啉-6-羧酸	Organic acids	有机酸	Organic acids	有机酸	C9H6N2O4	3	0.7049	14121-55-2	9010.72	9878.19	9926.48	379.45	3293.45	1490.95	1.20723	0.0062747	0.0388924	0.179205	-2.48032	down
MW0005444	5-(9-anthrylmethylene)-2,4,6(1H,3H,5H)-pyrimidinetrione	5-(9-蒽基亚甲基)-2,4,6(1H,3H,5H)-嘧啶三酮	Benzene and substituted derivatives	苯及其衍生物	Benzene and substituted derivatives	苯及其衍生物	C19H12N2O3	3	0.7029	66108-42-7	2337.73	2739.46	1062.7	1025.84	1025.73	362.46	1.02981	0.11827	0.253375	0.393172	-1.34677	down
MW0142666	Anhydrovinblastine	脱水长春碱	Alkaloids	生物碱	Plumerane	吲哚类生物碱	C46H56N4O8	3	0.7013	38390-45-3	19951.1	38180.6	44638.3	76768.1	111550	103023	1.2677	0.0104651	0.0515488	2.83488	1.50329	up
MW0115891	(3-Iodo-pyridin-4-yl)-carbamic acid tert-butyl ester	(3-碘-吡啶-4-基)-氨基甲酸叔丁酯	Organic acids	有机酸	Organic acids	有机酸	C10H13IN2O2	3	0.701	211029-67-3	1247.29	3775.89	6749.73	33495.8	44695.2	28336.8	1.30336	0.0152006	0.0656708	9.04856	3.17769	up
MW0117491	2-(Thiophen-2-yl)thiazole-4-carboxylic acid	2-(噻吩-2-基)噻唑-4-羧酸	Organic acids	有机酸	Organic acids	有机酸	C8H5NO2S2	3	0.7007	24044-07-3	154.22	168.76	2004.42	9840.06	10470.5	10289.2	1.26345	0.00221753	0.0223888	13.1476	3.71673	up
MW0126796	Thioperamide	硫哌酰胺	Alcohol and amines	醇、胺类	Amines	胺类	C15H24N4S	3	0.7006	106243-16-7	3336.15	3669.74	6498.49	2534.47	1048.07	426.37	1.11623	0.0668187	0.17406	0.29686	-1.75215	down
MW0003200	2-Methoxy-6-nitrobenzonitrile	2-甲氧基-6-硝基苄腈	Benzene and substituted derivatives	苯及其衍生物	Benzene and substituted derivatives	苯及其衍生物	C8H6N2O3	3	0.7	38469-85-1	131692	153194	198481	68848.8	67160.1	92197.9	1.30715	0.0350821	0.111697	0.472119	-1.08278	down
MW0112038	2-acetamido-2-deoxy-3-O-(alpha-L-fucopyranosyl)-D-glucopyranose	2-acetamido-2-deoxy-3-O-(alpha-L-fucopyranosyl)-D-glucopyranose	Others	其它类	Saccharides	糖类	C14H25NO10	3	0.6998	209977-50-4 | 24876-86-6	4397.1	6009.26	3612.8	1146.4	692.83	1149.98	1.36197	0.0302312	0.101828	0.213223	-2.22956	down
MW0121444	5-Ethynyl-1H-indole	5-Ethynyl-1H-吲哚	Alkaloids	生物碱	Plumerane	吲哚类生物碱	C10H7N	3	0.6996	889108-48-9	8162.15	9610.5	7886.73	21120.7	23746.2	22317.1	1.40327	0.000232132	0.00694013	2.6183	1.38863	up
MW0000049	N-Nitrosoanabasine	N-亚硝基烟碱	Alkaloids	生物碱	Alkaloids	生物碱	C10H13N3O	3	0.6989	1133-64-8	6763.41	8996.5	7584.95	13469.8	19392.5	20241.6	1.32631	0.0339641	0.109614	2.27476	1.18571	up
MW0127216	2-(Octylthio)ethanol	2-(辛硫基)乙醇	Alcohol and amines	醇、胺类	Alcohols	醇类	C10H22OS	3	0.6988	3547-33-9	12806.3	12074.1	11824.5	35792.5	29776.9	30012.2	1.40495	0.00873439	0.0466264	2.60405	1.38076	up
MW0108481	N-(tert-Butoxycarbonyl)-L-leucine	N-(叔丁氧羰基)-L-亮氨酸	Amino acids and derivatives	氨基酸及其衍生物	Amino acids and derivatives	氨基酸及其衍生物	C11H21NO4	3	0.6963	13139-15-6 | 53296-34-7	36765.5	54361.1	42068.6	78908.5	109123	115754	1.31578	0.022812	0.0849506	2.28076	1.18951	up
MW0141115	1,2-Dihydroxyfluorene	1，2-二羟基芴	Benzene and substituted derivatives	苯及其衍生物	Benzene and substituted derivatives	苯及其衍生物	C13H10O2	3	0.6957	42523-11-5	51866.3	34742.1	42377.1	9649.91	25842.2	16833.7	1.19571	0.0200869	0.0784037	0.405671	-1.30162	down
MW0160084	Benzo[a]pyrene-7,8-dione	苯并[a]芘-7,8-二酮	Benzene and substituted derivatives	苯及其衍生物	Benzene and substituted derivatives	苯及其衍生物	C20H10O2	3	0.6957	65199-11-3	534.38	678.72	376.67	1254.59	1077.61	858.02	1.23159	0.0234773	0.0863401	2.00672	1.00484	up
MW0139669	Schisandrin B	五味子乙素	Lignans and Coumarins	木脂素和香豆素	Lignans	木脂素	C23H28O6	3	0.6951	61281-37-6	83838.4	93201.5	89856.1	198709	191591	215229	1.4087	0.0013505	0.0171041	2.26878	1.18192	up
MW0118996	5-Amino-3-(2-thienyl)pyrazole	5-氨基-3-(2-噻吩基)吡唑	Heterocyclic compounds	杂环化合物	Heterocyclic compounds	杂环化合物	C7H7N3S	3	0.695	96799-03-0	544.23	1236.02	270.77	6007.03	5701	4961.39	1.32186	0.000334819	0.00858081	8.12738	3.02279	up
MW0119277	3-(2,3-Dioxo-1,2,3,4-tetrahydro-quinoxaline-6-sulfonyl)-propionic acid	3-(2,3-Dioxo-1,2,3,4-tetrahydro-quinoxaline-6-sulfonyl)-丙酸	Organic acids	有机酸	Organic acids	有机酸	C11H10N2O6S	3	0.6936	436096-98-9	2119.81	3090.23	5582.87	707.09	1719.81	1241.41	1.15008	0.139398	0.283948	0.339881	-1.5569	down
MW0118875	Pyridine-2-carbothioamide	吡啶-2-硫代碳酰胺	Alcohol and amines	醇、胺类	Amines	胺类	C6H6N2S	3	0.6935	5346-38-3	61363.9	59274.4	59397.8	26256.8	28060	28487.5	1.41423	4.6335e-06	0.00144509	0.459932	-1.12051	down
MW0157192	Squamocin	多鳞番荔枝辛	FA	脂肪酰类	Others	其它	C37H66O7	3	0.6934	120298-30-8	1.21882e+06	574450	152683	248965	57297.8	81497.9	1.00352	0.233024	0.396732	0.199266	-2.32724	down
MW0124391	Imidazole-4-methanol	咪唑-4-甲醇	Heterocyclic compounds	杂环化合物	Heterocyclic compounds	杂环化合物	C4H6N2O	3	0.6904	822-55-9	24521.5	32444.7	43971.1	8711.97	15760.3	4624.98	1.22261	0.0313634	0.104343	0.288271	-1.7945	down
MW0112714	3,5,5-Trimethylcyclohexane-1,2-dione	3,5,5-三甲基环己烷-1,2-二酮	Others	其它类	Ketone compounds	酮类化合物	C9H14O2	3	0.6891	57696-89-6	3184.09	2412.94	4470.56	13952.7	14605	8078.87	1.31446	0.0418457	0.12573	3.63907	1.86357	up
MW0146903	Bufencarb	布芬卡	Benzene and substituted derivatives	苯及其衍生物	Benzene and substituted derivatives	苯及其衍生物	C26H38N2O4	3	0.6887	8065-36-9 | 11096-91-6	41827.6	42023.9	48306.4	18588.7	16411.7	18325.8	1.40507	0.00346754	0.0278893	0.403503	-1.30935	down
MW0117533	2-(3-Nitrophenyl)quinoline-4-carboxylic acid	2-(3-硝基苯基)喹啉-4-羧酸	Organic acids	有机酸	Organic acids	有机酸	C16H10N2O4	3	0.6881	70097-12-0 | 572900-39-1	660.78	362.31	1462.23	2794.59	3823.8	7588.87	1.2413	0.10905	0.240138	5.71647	2.51512	up
MW0147731	Colubrinoside	科卢布里诺苷	Steroids	甾体	Steroid	甾体	C50H78O19	3	0.6875	59871-76-0 | 87834-10-4	931.36	1961.29	2081.02	7839.37	7837.12	7335.03	1.34766	0.000916927	0.0140608	4.62667	2.20997	up
MW0126537	Sempervirene	常绿钩吻碱	Alkaloids	生物碱	Plumerane	吲哚类生物碱	C19H16N2	3	0.6872	549-92-8	37.27	278.33	210.63	2454.95	3760.3	1941.81	1.29849	0.0403498	0.122998	15.5009	3.95428	up
MW0103544	Dihydrozeatin riboside	二氢玉米素核苷	Nucleotides and derivatives	核苷酸及其衍生物	Nucleotides and derivatives	核苷酸及其衍生物	C15H23N5O5	3	0.6868	22663-55-4 | 64070-21-9	15133.4	19504.3	14681.8	5305.66	5036.83	6264.69	1.38877	0.0151421	0.0655052	0.336726	-1.57035	down
MW0140902	[Ile7] Angiotensin III	[Ile7] Angiotensin III	Others	其它类	Others	其它	C43H68N12O9	3	0.6855	52498-25-6	238.71	1530.62	1009.68	1981.7	2591.89	2264.17	1.00811	0.0507972	0.143477	2.4605	1.29895	up
MW0138750	Lecanoric acid	十八烷酸	Organic acids	有机酸	Organic acids	有机酸	C16H14O7	3	0.6834	480-56-8	193526	247251	253845	100498	92437.8	107699	1.38098	0.0165277	0.0690386	0.432804	-1.20821	down
MW0127323	4-(Phenylthio)phthalonitrile	4-(苯硫基)邻苯二甲腈	Heterocyclic compounds	杂环化合物	Heterocyclic compounds	杂环化合物	C14H8N2S	3	0.6814	77474-63-6	29593.8	19211.7	18782.3	8510.75	8180.03	11470.7	1.30613	0.0553994	0.152003	0.416665	-1.26304	down
ZINC95910514	3'-Hydroxydehydroaglaiastatin	（2S，10R，11R)-2-羟基-10-(3-羟基-4-甲氧基苯基)-4，6-二甲氧基-11-苯基-9-氧杂-14，19-二氮杂五环[10.7.0.02，10.03，8.014，18]十九-1（12）3（8）4，6，18-五烯-13-酮	Others	其它类	Ketone compounds	酮类化合物	C31H28N2O7	3	0.6791	259143-58-3	10001.6	39860.2	20708	64478.4	61586.5	64093.4	1.16164	0.0434774	0.129127	2.69461	1.43008	up
MW0011435	Icariside C(1)	伊卡里西 C(1)	Terpenoids	萜类	Terpene	萜类	C21H38O8	3	0.6764	108906-50-9	2527.02	1735.28	1900.78	958.01	171.96	1084.26	1.03121	0.025507	0.0907752	0.359273	-1.47685	down
MW0123902	ethyl 5-[(methylamino)carbonyl]-10,11-dihydro-5H-dibenzo[b,f]azepin-3-ylcarbamate	5-[(甲氨基)羰基]-10,11-二氢-5H-二苯并[b,f]azepin-3-ylcarbamate乙酯	Benzene and substituted derivatives	苯及其衍生物	Benzene and substituted derivatives	苯及其衍生物	C19H21N3O3	3	0.6755	5957-43-7 | 332873-88-8	1308.37	891.86	1641.4	4494.99	6817.31	7935.36	1.35609	0.0320618	0.10582	5.01028	2.32489	up
MW0117156	1-Hydroxyphenazine	1-羟基吩嗪	Heterocyclic compounds	杂环化合物	Heterocyclic compounds	杂环化合物	C12H8N2O	3	0.673	528-71-2	639.69	689.29	270.36	4408.07	4081.87	3780.42	1.363	0.000166378	0.00607748	7.67214	2.93963	up
MW0000455	methyl (12R,19S)-12-ethyl-8,16-diazapentacyclo[10.6.1.01,9.02,7.016,19]nonadeca-2,4,6,9,13-pentaene-10-carboxylate	水甘草碱	Alkaloids	生物碱	Plumerane	吲哚类生物碱	C21H24N2O2	3	0.672	4429-63-4	58074.4	62794.6	115260	286725	231753	218788	1.31952	0.00403273	0.0299324	3.1223	1.64261	up
MW0003193	(E)-5-((2,4,6-trimethoxystyrylsulfonyl)methyl)-2-methoxybenzenamine	(E)-5-((2,4,6-三甲氧基苯乙烯基磺酰基)甲基)-2-甲氧基苯胺	Phenolic acids	酚酸类	Phenolic acids	酚酸类	C19H23NO6S	3	0.6702	592542-50-2	4426.61	6401.21	7249.86	3077.33	3158.24	707.12	1.04746	0.0329862	0.107831	0.384048	-1.38064	down
MW0009823	Sulprofos sulfoxide	磺基亚砜	Benzene and substituted derivatives	苯及其衍生物	Benzene and substituted derivatives	苯及其衍生物	C12H19O3PS3	3	0.6701	34643-47-5	262.96	272.85	116.92	564.59	1943.91	815.3	1.22164	0.169001	0.323284	5.09215	2.34828	up
MW0125910	2(1H)-Isoquinolinecarbothioamide, 3,4-dihydro-N-phenyl-	2(1H)-异喹啉硫代碳酰胺，3,4-二氢-N-苯基-	Alcohol and amines	醇、胺类	Amines	胺类	C16H16N2S	3	0.6687	89652-23-3	5135.75	9494.55	7697.13	2214.5	1520.39	1675.02	1.35669	0.0434926	0.129127	0.242299	-2.04514	down
MEDN1403	10-Hydroxy-2-decenoic acid	10-羟基-2-癸烯酸(10-HAD),蜂王浆酸	Lipids	脂质	Free fatty acids	游离脂肪酸	C10H18O3	3	0.6685	14113-05-4 | 765-01-5	29813.6	29507.7	46137.1	107926	86633.9	88278	1.34804	0.00296964	0.0261989	2.68199	1.4233	up
MW0116068	Demethylated Cyclopeptin	去甲基化环肽素	Benzene and substituted derivatives	苯及其衍生物	Benzene and substituted derivatives	苯及其衍生物	C16H14N2O2	3	0.666	32781-96-7	4350.53	8273.75	3554.88	1645.14	3455.41	2504.01	1.048	0.180143	0.336287	0.470022	-1.0892	down
MW0105514	Ala-Gly	甘氨酸	Amino acids and derivatives	氨基酸及其衍生物	Amino acids and derivatives	氨基酸及其衍生物	C5H10N2O3	3	0.6646	687-69-4 | 25765-55-3	48487.1	55096.8	46819.2	144526	103303	109488	1.36939	0.0290481	0.0990289	2.37573	1.24837	up
MW0156594	Huperizne	石杉碱	Heterocyclic compounds	杂环化合物	Heterocyclic compounds	杂环化合物	C15H18N2O	3	0.6626	116-28-9	15123.4	14676.4	17080.6	31144.4	32985.8	36905	1.39585	0.00337055	0.0276796	2.15517	1.1078	up
MW0110745	2-Hexadecanoylthio-1-ethylphosphorylcholine	2-十六烷基硫代-1-乙基磷酰胆碱	Organic acids	有机酸	Organic acids	有机酸	C23H48NO5PS	3	0.6615	60793-01-3	40280.9	41066.6	45250.9	7353.67	8114.5	11227.5	1.39807	0.000106582	0.00471426	0.210869	-2.24558	down
MW0116144	(4-Hydroxy-quinazolin-2-ylsulfanyl)-acetic acid	(4-Hydroxy-quinazolin-2-ylsulfanyl)-acetic acid	Organic acids	有机酸	Organic acids	有机酸	C10H8N2O3S	3	0.6613	16431-29-1	1632.28	2076.04	2651.56	4780.34	5051.46	5459.1	1.34827	0.00196526	0.0206423	2.40427	1.2656	up
MW0118200	2-Aminobenzothiazole-6-carbonitrile	2-氨基苯并噻唑-6-甲腈	Benzene and substituted derivatives	苯及其衍生物	Benzene and substituted derivatives	苯及其衍生物	C8H5N3S	3	0.6603	19759-66-1	60787.9	91391.3	127245	34449.8	31914.2	39257.1	1.28039	0.0927585	0.217182	0.377995	-1.40356	down
MW0003798	3-Amino-5-sulfosalicylic acid	3-氨基-5-磺基水杨酸	Benzene and substituted derivatives	苯及其衍生物	Benzene and substituted derivatives	苯及其衍生物	C7H7NO6S	3	0.6598	6201-86-1	4780.6	4310.7	4430.18	1388.58	938.28	847.79	1.38785	0.000114138	0.00488241	0.234786	-2.09058	down
MW0005245	4-methyl-N-(4-nitrophenyl)piperazine-1-carbothioamide	4-甲基-N-(4-硝基苯基)哌嗪-1-硫代碳酰胺	Benzene and substituted derivatives	苯及其衍生物	Benzene and substituted derivatives	苯及其衍生物	C12H16N4O2S	3	0.6592	78721-53-6	1376.64	260.49	870.77	29.96	45.82	157.77	1.22638	0.141197	0.286626	0.0931257	-3.42468	down
MW0150673	Gymnemic acid I	匙羹藤酸I	Organic acids	有机酸	Organic acids	有机酸	C43H66O14	3	0.6565	122168-40-5	8846.64	13382	41694.3	60684.7	38881.2	57248.8	1.06488	0.0753226	0.188716	2.45318	1.29465	up
MW0123329	Cilostamide	西洛他胺	Alcohol and amines	醇、胺类	Amines	胺类	C20H26N2O3	3	0.6564	68550-75-4	4783.57	6028.52	7804.09	1982.05	1631.04	1975.81	1.37188	0.0364171	0.114768	0.300217	-1.73592	down
MW0115793	(1-methyl-1H-pyrazol-5-yl)methanol	(1-甲基-1H-吡唑-5-基)甲醇	Heterocyclic compounds	杂环化合物	Heterocyclic compounds	杂环化合物	C5H8N2O	3	0.6562	84547-61-5	2468.59	4224	4846.48	2341.07	889.32	466.04	1.11944	0.0481139	0.138627	0.32034	-1.64232	down
MW0001655	TCS JNK 5a	TCS JNK 5a	Benzene and substituted derivatives	苯及其衍生物	Benzene and substituted derivatives	苯及其衍生物	C20H16N2OS	3	0.656	312917-14-9	396.03	799.51	469.14	842.83	2834.36	1944.05	1.14782	0.14376	0.290019	3.37677	1.75564	up
MW0000546	2-(Diethylamino)-1-phenylpropan-1-OL	2-(二乙氨基)-1-苯基丙-1-OL	Benzene and substituted derivatives	苯及其衍生物	Benzene and substituted derivatives	苯及其衍生物	C13H21NO	3	0.655	18259-38-6	3069.71	2504.85	3058.65	488.25	485.06	1001.69	1.34809	0.000966792	0.0143191	0.228768	-2.12804	down
pme0321	Kaempferol-7-rhamnoside	山柰酚-7-O-鼠李糖苷	Flavonoids	黄酮	Flavonols	黄酮醇	C21H20O10	3	0.6549	20196-89-8	63189.4	73474.1	74479.8	27061.4	24447.3	29661.8	1.40003	0.00260064	0.0244355	0.384433	-1.37919	down
MW0150170	Glu-Thr-Tyr	谷氨酸-苏氨酸-酪氨酸	Amino acids and derivatives	氨基酸及其衍生物	Amino acids and derivatives	氨基酸及其衍生物	C18H25N3O8	3	0.6522	110642-78-9	7923.2	11218.8	8599.75	2096.65	856.53	5852.01	1.11258	0.0311831	0.103936	0.317398	-1.65563	down
MW0000939	3-Nitro-4-piperidino-benzophenone	3-硝基-4-哌啶基-二苯甲酮	Benzene and substituted derivatives	苯及其衍生物	Benzene and substituted derivatives	苯及其衍生物	C18H18N2O3	3	0.6521	56106-97-9	2522.66	3666.19	1955.22	5760.22	6281.65	5978.36	1.29529	0.0161268	0.068058	2.21268	1.1458	up
MW0010642	Phyllanthin	叶下珠脂素	Lignans and Coumarins	木脂素和香豆素	Lignans	木脂素	C24H34O6	3	0.651	10351-88-9	160.99	241.8	33.12	513.09	607.04	903.96	1.16137	0.0282262	0.0970014	4.64337	2.21517	up
MW0154530	Nitrovin	硝呋烯腙	Others	其它类	Ketone compounds	酮类化合物	C14H12N6O6	3	0.6477	804-36-4	2016.41	2398.79	3611.85	8848.91	7727.23	7966.88	1.354	0.00118429	0.0158888	3.05754	1.61237	up
MW0154317	N-benzoyl-4-methoxyanthranilic acid	N-苄基-4-甲氧基邻氨基苯甲酸酯	Benzene and substituted derivatives	苯及其衍生物	Benzene and substituted derivatives	苯及其衍生物	C15H13NO4	3	0.6464	109437-82-3	31874.6	34308.6	43717.1	20817	13108.1	17727	1.30088	0.0155139	0.0663627	0.46999	-1.0893	down
MW0144828	Ala-ile	丙氨酸异亮氨酸	Amino acids and derivatives	氨基酸及其衍生物	Amino acids and derivatives	氨基酸及其衍生物	C9H18N2O3	3	0.6449	29727-65-9	48423.4	52155.7	55373.8	10162.3	10855.1	9651.34	1.41494	0.0017878	0.0196356	0.196654	-2.34627	down
MEDN1207	Cysteinyldopa	半胱氨酸多巴	Amino acids and derivatives	氨基酸及其衍生物	Amino acids and derivatives	氨基酸及其衍生物	C12H16N2O6S	3	0.644	19641-92-0	2889.03	2205.42	1922.09	1357.23	696.07	227.14	1.11012	0.0229574	0.0852873	0.325009	-1.62145	down
MW0108024	Lys-Trp-Lys	L-赖氨酸-L-色氨酸-L-赖氨酸	Amino acids and derivatives	氨基酸及其衍生物	Amino acids and derivatives	氨基酸及其衍生物	C23H36N6O4	3	0.6402	38579-27-0	207642	210614	212490	82989.1	81717.7	83156.3	1.41756	2.91264e-05	0.00286939	0.392969	-1.34751	down
MW0160424	MeSPuRMP	MeSPuRMP	Nucleotides and derivatives	核苷酸及其衍生物	Nucleotides and derivatives	核苷酸及其衍生物	C11H15N4O7PS	3	0.6349	7021-52-5	31573.8	55503.8	52536.4	5658.74	9472.45	23590.2	1.19672	0.0262524	0.0926674	0.277346	-1.85024	down
MW0117724	2-(Phenoxymethyl)-1,3-benzothiazole	2-(苯氧基甲基)-1,3-苯并噻唑	Benzene and substituted derivatives	苯及其衍生物	Benzene and substituted derivatives	苯及其衍生物	C14H11NOS	3	0.6329	37859-39-5	258.91	96.75	7115.12	17878	22898.9	19010.6	1.14404	0.0052262	0.0347097	8.00284	3.00051	up
MW0117339	5-(2-Hydroxyethyl)-1,3-thiazole	5-(2-羟乙基)-1,3-噻唑	Heterocyclic compounds	杂环化合物	Heterocyclic compounds	杂环化合物	C5H7NOS	3	0.6314	5664-55-1	1032.01	1416.39	406.17	9245.96	10667.5	6175.01	1.33681	0.0236406	0.0866956	9.13921	3.19207	up
MEDN1401	5-Phenylpenta-2,4-dienoic acid	5-苯基戊烷-2,4-双酸	Organic acids	有机酸	Organic acids	有机酸	C11H10O2	3	0.6302	1552-94-9 | 28010-12-0 | 185152-35-6 | 38446-98-9	16107.5	16387.6	16547.5	4638.86	6847.38	6713.79	1.37471	0.00383444	0.0291256	0.371107	-1.43009	down
MW0008547	N,3-dimethyl-N-[(2R)-4-(4-methylpiperidin-1-yl)butan-2-yl]benzenesulfonamide	N,3-二甲基-N-[(2R)-4-(4-甲基哌啶-1-基)丁-2-基]苯磺酰胺	Benzene and substituted derivatives	苯及其衍生物	Benzene and substituted derivatives	苯及其衍生物	C18H30N2O2S	3	0.6297	195199-95-2	2850.56	4839.7	5909.51	11762.5	14724.5	6451.88	1.13251	0.103197	0.231695	2.42202	1.27621	up
MW0007892	Urea, 1-(1-naphthyl)-3-phenyl-2-thio-	脲，1-(1-萘基)-3-苯基-2-硫代-	Benzene and substituted derivatives	苯及其衍生物	Benzene and substituted derivatives	苯及其衍生物	C17H14N2S	3	0.6283	24775-57-3	465.51	1051.1	643.23	3496.35	6107.35	3178.11	1.33882	0.0578702	0.156524	5.91794	2.5651	up
MW0114601	Humulone	律草酮	Others	其它类	Others	其它	C21H30O5	3	0.628	26472-41-3	269.31	586.07	2046.78	16313	19641	18877.4	1.33284	0.000536969	0.0109105	18.8933	4.2398	up
MW0004515	4-[(Z)-(4-oxo-2-thioxo-1,3-thiazolidin-5-ylidene)methyl]benzoic acid	4-[(Z)-(4-oxo-2-thioxo-1,3-thiazolidin-5-ylidene)methyl]苯甲酸	Benzene and substituted derivatives	苯及其衍生物	Benzene and substituted derivatives	苯及其衍生物	C11H7NO3S2	3	0.6267	103987-82-2	203.78	371.98	130.37	3658.45	3459.04	3838.34	1.38605	4.42014e-05	0.00350484	15.5153	3.95562	up
MW0121749	6-(4-methoxyphenyl)-2-thioxo-2,3-dihydropyrimidin-4(1H)-one	6-(4-甲氧基苯基)-2-thioxo-2,3-dihydropyrimidin-4(1H)-one	Others	其它类	Ketone compounds	酮类化合物	C11H10N2O2S	3	0.6251	33166-87-9	79.97	427.25	296.4	1586.98	1413.87	1206.52	1.24055	0.00166115	0.0190154	5.23552	2.38833	up
MW0002836	2-Carbamoyl-3-nitrobenzoic acid	2-氨基甲酰基-3-硝基苯甲酸	Benzene and substituted derivatives	苯及其衍生物	Benzene and substituted derivatives	苯及其衍生物	C8H6N2O5	3	0.6237	77326-45-5	1929.28	1258.09	845.63	3572.52	2711.77	6310.2	1.21111	0.109538	0.240533	3.12286	1.64287	up
MW0000246	Ergocornine	麦角碱	Alkaloids	生物碱	Alkaloids	生物碱	C31H39N5O5	3	0.6231	564-36-3	29798.3	35610.5	31576.4	14393.7	15122.3	16392.3	1.39699	0.00555432	0.0362592	0.473353	-1.07901	down
MW0111148	4,4'-Hexamethylenebis(1,1-dimethylsemicarbazide)	4,4'-六亚甲基双(1,1-二甲基氨基脲)	Alcohol and amines	醇、胺类	Amines	胺类	C12H28N6O2	3	0.6216	69938-76-7	415.56	517.71	7197.47	19267.1	11082.9	12361.6	1.13301	0.0279411	0.0963599	5.2531	2.39317	up
MW0104210	11-Dehydro-2,3-dinor-txb2	11-脱氢-2,3-二恶烷B2	Organic acids	有机酸	Organic acids	有机酸	C18H28O6	3	0.6213	79250-60-5	34680	34778.2	36069.2	130263	140294	163054	1.41131	0.00767589	0.0429876	4.109	2.03879	up
MW0007080	Ethyl 4-hydroxy-3,5-dimethoxybenzoate	丁香酸乙酯	Benzene and substituted derivatives	苯及其衍生物	Benzene and substituted derivatives	苯及其衍生物	C11H14O5	3	0.6177	3943-80-4	39944.8	28688.1	29912	315981	90897.8	60483.5	1.11984	0.26646	0.432915	4.74263	2.24569	up
MW0168258	Dihydrorobinetin	二氢鸟嘌呤	Flavonoids	黄酮	Flavones	黄酮	C15H12O7	3	0.6165	4382-33-6 | 93432-80-5	16046.4	27408.6	8480.68	10989	2773.97	5330.62	1.00231	0.174464	0.330045	0.367639	-1.44364	down
MW0126870	N-(2-benzamido-1,3-benzothiazol-6-yl)adamantane-1-carboxamide	N-(2-苯甲酰胺-1,3-苯并噻唑-6-基)金刚烷-1-甲酰胺	Alcohol and amines	醇、胺类	Amines	胺类	C25H25N3O2S	3	0.6136	362003-83-6	67374.6	79212.5	151326	24693.6	31939.6	33596.4	1.28582	0.117069	0.251713	0.302872	-1.72322	down
MW0142271	Pyrimidine-2-carboxylic acid	嘧啶-2-羧酸	Nucleotides and derivatives	核苷酸及其衍生物	Nucleotides and derivatives	核苷酸及其衍生物	C5H4N2O2	3	0.6134	31519-62-7 | 27457-25-6	164.02	31.23	1990.91	16592.7	16982.8	16517.7	1.23883	0.000975223	0.0143434	22.9137	4.51814	up
MW0053661	Glucocerebrosides	Glucocerebrosides	SL	鞘脂类	Cer	神经酰胺	C40H75NO9	3	0.613	497155-61-0	93013.3	51789.2	85660.3	157009	200718	186006	1.29532	0.0044429	0.0316671	2.35931	1.23837	up
MW0016980	Cephalomannine	三尖杉宁碱	Benzene and substituted derivatives	苯及其衍生物	Benzene and substituted derivatives	苯及其衍生物	C45H53NO14	3	0.6128	71610-00-9	2979.89	2725.93	5201.28	11168.7	11390.1	11185.5	1.33999	0.010035	0.050462	3.09379	1.62938	up
MW0103135	Withanolide B	醉茄内酯 B	Others	其它类	Others	其它	C28H38O5	3	0.6123	56973-41-2	3706.35	6743.9	7540.88	12396.6	13222.3	16756.7	1.24979	0.0106379	0.0520554	2.35536	1.23595	up
MW0145987	L-Asparaginyl-L-lysine	L-天冬酰胺-L-赖氨酸	Amino acids and derivatives	氨基酸及其衍生物	Amino acids and derivatives	氨基酸及其衍生物	C10H20N4O4	3	0.6093	22677-58-3	409164	385252	415307	152601	142324	175385	1.40452	5.28941e-05	0.0036587	0.388775	-1.36299	down
MW0052939	Forskolin	毛喉素	Terpenoids	萜类	Ditepenoids	二萜	C22H34O7	3	0.6092	66575-29-9 | 66428-89-5	3402.51	9394.29	3710.56	10740.4	14518.7	17537.1	1.17303	0.0339867	0.109614	2.59255	1.37437	up
MW0140124	(+)-Methallenestrilphenol	(+)-亚甲基苯酚	Benzene and substituted derivatives	苯及其衍生物	Benzene and substituted derivatives	苯及其衍生物	C17H20O3	3	0.6043	20664-58-8	1388.81	389.84	2390.87	439.99	214.42	336.93	1.03662	0.206826	0.367728	0.237759	-2.07243	down
MW0116332	1-(2-Furoyl)-1H-benzotriazole	1-(2-Furoyl)-1H-苯并三唑	Benzene and substituted derivatives	苯及其衍生物	Benzene and substituted derivatives	苯及其衍生物	C11H7N3O2	3	0.6012	144223-33-6	943.66	563.26	598.2	2175.53	1722.44	2036.66	1.34471	0.00220239	0.0222705	2.81914	1.49526	up
MW0111324	Timolol maleate	马来酸噻吗洛尔	Organic acids	有机酸	Organic acids	有机酸	C17H28N4O7S	3	0.5981	26921-17-5 | 60469-65-0	13090.9	15622.2	16590	1633.44	2946.88	5603.22	1.29284	0.00179752	0.0196759	0.224787	-2.15337	down
MW0128015	Epiafzelechin trimethyl ether	依帕西林三甲醚	Benzene and substituted derivatives	苯及其衍生物	Benzene and substituted derivatives	苯及其衍生物	C18H20O5	3	0.5968	3143-21-3	2357.9	5114.65	3858.02	293.58	514.59	919.66	1.31076	0.0504407	0.143154	0.152493	-2.71319	down
MW0158046	Trichotomine	曲索明	Benzene and substituted derivatives	苯及其衍生物	Benzene and substituted derivatives	苯及其衍生物	C30H20N4O6	3	0.5938	53472-14-3	325671	334120	311556	1.03765e+06	1.14349e+06	990471	1.4134	0.00323031	0.0272618	3.26518	1.70716	up
MW0153101	Lys-Phe-Lys	L-赖氨酸-L-苯丙氨酸-L-赖氨酸	Amino acids and derivatives	氨基酸及其衍生物	Amino acids and derivatives	氨基酸及其衍生物	C21H35N5O4	3	0.5937	54925-87-0	6667.03	7335.27	5756.96	23944.8	32672.5	26165.6	1.39953	0.0131517	0.0596322	4.18957	2.0668	up
MW0128347	N-Phenethylcinnamamide	N-苯乙基肉桂酰胺	Alcohol and amines	醇、胺类	Amines	胺类	C17H17NO	3	0.593	55030-23-4	5920.11	10081.6	7230.6	2427.73	2354.78	3141.53	1.34248	0.0483381	0.138948	0.341078	-1.55183	down
MW0142785	Pregnane-3alpha,17alpha-diol-11,20-dione	3alpha，17alpha-Dihydroxy-5beta-pregnane-11,20-dione; 17alpha-Hydroxy-11-ketopregnanolone	Others	其它类	Ketone compounds	酮类化合物	C21H32O4	3	0.5928	641-78-1	176739	205805	200228	355184	397132	442883	1.38433	0.00879855	0.0468688	2.05088	1.03625	up
MW0151707	Iminoacetic acid	亚氨基乙酸	Organic acids	有机酸	Organic acids	有机酸	C2H3NO2	3	0.5927	4472-12-2	6144.33	6147.54	6743.06	1969.07	2753.02	1336.55	1.33555	0.00286422	0.0258655	0.318291	-1.65158	down
MW0140674	(S)-autumnaline	（S)-秋草碱；秋水仙碱	Alkaloids	生物碱	Isoquinoline alkaloids	异喹啉类生物碱	C21H27NO5	3	0.5904	23068-65-7	8993.36	4363.03	4615.35	2452.34	1332.44	2068.57	1.2484	0.108954	0.240138	0.325697	-1.6184	down
MW0154029	Myricoside	Myricoside	Benzene and substituted derivatives	苯及其衍生物	Benzene and substituted derivatives	苯及其衍生物	C34H44O19	3	0.5892	76076-04-5	329940	322220	319287	637557	654286	659214	1.41665	3.35463e-05	0.00315037	2.0084	1.00605	up
MW0003531	n-[3-(Cyclohexylamino)-4-methoxyphenyl]acetamide	n-[3-(环己基氨基)-4-甲氧基苯基]乙酰胺	Benzene and substituted derivatives	苯及其衍生物	Benzene and substituted derivatives	苯及其衍生物	C15H22N2O2	3	0.5882	29633-64-5	16252.9	12633.4	10004.6	53491.5	61180.9	65645.6	1.39128	0.00134998	0.0171041	4.63651	2.21304	up
MW0116937	1-ethyl-1H-tetrazol-5-amine	1-乙基-1H-四唑-5-胺	Heterocyclic compounds	杂环化合物	Heterocyclic compounds	杂环化合物	C3H7N5	3	0.5875	65258-53-9	17614.6	17140.6	19623.3	111301	94397.9	85587.2	1.41014	0.00848744	0.0456832	5.35665	2.42133	up
MW0009767	Streptovaricinal C	链霉素C	Others	其它类	Lactones	内酯类化合物	C40H49NO14	3	0.5815	54955-14-5	154337	212119	132901	42912.3	37685.8	57140.6	1.36256	0.0304449	0.102248	0.275832	-1.85814	down
MW0143757	6-Acetylpicropolin	6-乙酰基苦酚	Amino acids and derivatives	氨基酸及其衍生物	Amino acids and derivatives	氨基酸及其衍生物	C24H28O9	3	0.5783	116187-56-5 | 28393-25-1	30374.6	60560.1	56307.2	118501	123823	139418	1.29214	0.00380045	0.028969	2.59261	1.37441	up
FDATN00765	Sulisobenzone	舒异苯宗	Benzene and substituted derivatives	苯及其衍生物	Benzene and substituted derivatives	苯及其衍生物	C14H12O6S	3	0.5759	4065-45-6	222841	362504	512829	98395.7	90685.8	128071	1.29822	0.0871299	0.208432	0.2888	-1.79186	down
MW0155665	(2S)-4-[(E)-2-(carboxymethylamino)vinyl]-2,3-dihydropyridine-2,6-dicarboxylic acid	(2S)-4-[(E)-2-(羧甲基氨基)乙烯基]-2,3-二氢吡啶-2,6-二羧酸	Organic acids	有机酸	Organic acids	有机酸	C11H12N2O6	3	0.574	135545-99-2	10270.5	14379.3	11380.7	18222.8	23115	33225.2	1.23204	0.0914477	0.215258	2.06944	1.04924	up
MW0103923	(E)-2-phenyl-4-(thiophen-2-ylmethylene)oxazol-5(4H)-one	(E)-2-苯基-4-(噻吩-2-基亚甲基)恶唑-5(4H)-one	Others	其它类	Lactones	内酯类化合物	C14H9NO2S	3	0.5688	68100-05-0 | 88991-45-1	38973.5	17314.9	20495.6	17757.5	7967.2	11995.1	1.01853	0.184147	0.340771	0.491245	-1.02549	down
MW0149004	Esmeraldic acid	翡翠酸	Organic acids	有机酸	Organic acids	有机酸	C30H22N4O5	3	0.5672	119936-20-8	1.30921e+06	1.51896e+06	1.71275e+06	610801	615796	584723	1.39698	0.0155006	0.0663627	0.398888	-1.32594	down
MW0002830	2-Butanol, 1-((2,3-dihydro-7-methyl-1H-inden-4-yl)oxy)-3-((1-methylethyl)amino)-, (2R,3R)-rel-	2-丁醇，1-((2,3-dihydro-7-methyl-1H-inden-4-yl)oxy)-3-((1-methylethyl)amino)-, (2R,3R)-rel-	Benzene and substituted derivatives	苯及其衍生物	Benzene and substituted derivatives	苯及其衍生物	C17H27NO2	3	0.5601	72795-26-7	11351	14623.1	9573.97	5922.09	6087.53	2536	1.18456	0.0224606	0.0842207	0.409181	-1.28919	down
MW0145615	Aridanin	阿里达宁	Alcohol and amines	醇、胺类	Amines	胺类	C38H61NO8	3	0.5582	81053-26-1	9658.91	5356.11	12277.5	33975.8	36601	29730.3	1.32755	0.00102144	0.014726	3.67526	1.87785	up
MW0149605	Glepidotin C	皂荚苷C	Flavonoids	黄酮	Flavones	黄酮	C19H22O3	3	0.5575	126026-25-3	7261.08	3979.64	6867.95	33443.4	35625.5	35333.2	1.38582	6.29009e-05	0.00400963	5.76531	2.5274	up
MW0108015	Lys-Pro-Arg	L-赖氨酸-L-脯氨酸-L-精氨酸	Amino acids and derivatives	氨基酸及其衍生物	Amino acids and derivatives	氨基酸及其衍生物	C17H33N7O4	3	0.5545	41961-57-3	5901.1	13635.8	6693.28	26235.8	32597.5	30965	1.30993	0.0030046	0.0263999	3.42347	1.77546	up
MW0144418	[(1S,12S,14R,15E)-15-ethylidene-3-methyl-3,17-diazapentacyclo[12.3.1.02,10.04,9.012,17]octadeca-2(10),4,6,8-tetraen-13-yl]methanol	阿菲尼辛	Alkaloids	生物碱	Alkaloids	生物碱	C20H24N2O	3	0.5452	2912-11-0	483490	590435	530918	898942	1.18716e+06	1.20119e+06	1.35354	0.0214964	0.0815936	2.04836	1.03447	up
MW0061611	Phorbol 12-myristate 13-acetate	12-O-十四酰基佛波醇13-乙酸酯	Heterocyclic compounds	杂环化合物	Heterocyclic compounds	杂环化合物	C36H56O8	3	0.5447	16561-29-8 | 11016-13-0	45007.8	80618.7	42748.5	146731	180138	220693	1.3214	0.0123656	0.0574587	3.25204	1.70134	up
MW0154660	Nupharamine	萍蓬草胺	Alkaloids	生物碱	Terpenoid alkaloids	萜类生物碱	C15H25NO2	3	0.5359	17812-38-3	105670	112160	212463	45662.6	45161.5	111354	1.03611	0.149746	0.298838	0.469861	-1.08969	down
MW0008211	N-(3-hydroxyphenyl)-Arachidonoyl amide	N-(3-羟苯基)-花生酰胺	Benzene and substituted derivatives	苯及其衍生物	Benzene and substituted derivatives	苯及其衍生物	C26H37NO2	3	0.5347	183718-75-4	37934.5	45944.6	42756.8	124193	67615.1	68267.7	1.20816	0.139031	0.283599	2.05373	1.03825	up
MW0110643	2-Furan-2-yl-ethylamine	2-呋喃-2-基乙胺	Alcohol and amines	醇、胺类	Amines	胺类	C6H9NO	3	0.5318	1121-46-6	1609.56	2989.26	4393.14	1272.34	1091.93	1464.91	1.11821	0.163358	0.316324	0.425845	-1.2316	down
MW0161303	Benzeneacetonitrile, 4-hydroxy-3-methoxy-alpha-(3-(methylamino)propyl)-alpha-(1-methylethyl)-	苯乙腈，4-羟基-3-甲氧基-α-(3-(甲基氨基)丙基)-α-(1-甲基乙基)-	Benzene and substituted derivatives	苯及其衍生物	Benzene and substituted derivatives	苯及其衍生物	C16H24N2O2	3	0.5103	71539-08-7	60454.9	59449.9	65279.5	301751	157986	151470	1.31909	0.101248	0.229059	3.30054	1.7227	up
MW0014741	(5S)-5-Carboxystrictosidine	(5S)-5-羧缩丝氨酸	Organic acids	有机酸	Organic acids	有机酸	C28H34N2O11	3	0.5048	34371-47-6	339267	342798	371342	874359	876811	855132	1.41472	7.05866e-06	0.00157871	2.47417	1.30694	up
MW0109318	Pro-Ile-Arg	脯氨酰-异亮氨酰-精氨酸	Amino acids and derivatives	氨基酸及其衍生物	Amino acids and derivatives	氨基酸及其衍生物	C17H32N6O4	2	0.9435	-	213088	233472	235991	101682	99242.1	107065	1.41099	0.00159436	0.018578	0.451232	-1.14806	down
MW0145780	Asn-Ile-Ala	L-天冬酰胺-L-异亮氨酰-L-丙氨酸	Amino acids and derivatives	氨基酸及其衍生物	Amino acids and derivatives	氨基酸及其衍生物	C13H24N4O5	2	0.9035	-	47081.8	49533.5	50550	22267.9	21092.1	21500.5	1.4149	0.00051315	0.0106597	0.440733	-1.18202	down
MW0155216	Phe-His-Trp	苯丙氨酰-组氨酰-色氨酸	Amino acids and derivatives	氨基酸及其衍生物	Amino acids and derivatives	氨基酸及其衍生物	C26H28N6O4	2	0.9019	-	7252.86	15653	3802.65	2114.22	1826.51	4229.16	1.06065	0.217478	0.380118	0.305891	-1.70891	down
MW0158454	Tyr-Glu-Cys	酪氨酸-谷氨酸-半胱氨酸	Amino acids and derivatives	氨基酸及其衍生物	Amino acids and derivatives	氨基酸及其衍生物	C17H23N3O7S1	2	0.898	-	1.31046e+06	1.45963e+06	1.4678e+06	504272	443639	519514	1.40867	0.000735026	0.0127173	0.346264	-1.53006	down
MW0054311	19-[(2S,3S)-3,6-Dihydro-3-methyl-6-oxo-2H-pyran-2-yl]-17-ethyl-6-hydroxy-3,5S,7S,9R,11,15R,hexamethyl-8-oxo-2E,10E,12E,16Z,18E-nonadecapentaenoic acid	19-[(2S,3S)-3,6-Dihydro-3-methyl-6-oxo-2H-pyran-2-yl]-17-ethyl-6-hydroxy-3,5S,7S,9R,11, 15R,hexamethyl-8-oxo-2E,10E,12E,16Z,18E-十九碳五烯酸	FA	脂肪酰类	Others	其它	C33H48O6	2	0.8974	-	124312	137196	133672	594606	297884	305096	1.30094	0.111369	0.243157	3.03048	1.59955	up
MW0155177	Phe-Glu-His	苯丙氨酰-谷氨酰-组氨酸	Amino acids and derivatives	氨基酸及其衍生物	Amino acids and derivatives	氨基酸及其衍生物	C20H25N5O6	2	0.8957	-	22208.4	8774.37	18339.5	40372.8	36621.1	44210.3	1.21832	0.0122709	0.0571527	2.45739	1.29713	up
MW0153788	Methyl 10-gingerol	甲基- 10-姜酚	Others	其它类	Lactones	内酯类化合物	C22H36O4	2	0.8877	-	5785.19	7189.95	3815.94	16683.4	15924.2	21280.8	1.33965	0.00625294	0.0387945	3.20935	1.68228	up
MW0145964	Asn-Abu-OH	Asn-Abu-OH	Amino acids and derivatives	氨基酸及其衍生物	Amino acids and derivatives	氨基酸及其衍生物	C13H15N3O7	2	0.8822	-	74857.5	55404.2	76160.1	186601	161845	178305	1.37981	0.000433327	0.00991777	2.55182	1.35152	up
MW0150892	His-Gln-Ala	组氨酸-谷酰胺-丙氨酸	Amino acids and derivatives	氨基酸及其衍生物	Amino acids and derivatives	氨基酸及其衍生物	C14H22N6O5	2	0.8797	-	752.2	3070.16	5476.42	23502.9	21037.9	11198.1	1.20219	0.0414543	0.124786	5.99422	2.58357	up
MW0159242	Val-Val-Leu	缬氨酸-缬氨酸-亮氨酸	Amino acids and derivatives	氨基酸及其衍生物	Amino acids and derivatives	氨基酸及其衍生物	C16H31N3O4	2	0.871	-	9184.86	9712.98	7718.21	4251.64	3246.26	4419.91	1.35988	0.00426998	0.0309879	0.447768	-1.15918	down
MW0054336	alpha-L-Fucp-(1->3)-[beta-D-Galp-(1->4)]-D-GlcpNAc	alpha-L-Fucp-(1->3)-[beta-D-Galp-(1->4)]-D-GlcpNAc	Others	其它类	Saccharides	糖类	C20H35NO15	2	0.868	-	32381.1	48695.4	44617.2	84711.3	88773	84270.3	1.34152	0.00800418	0.0439392	2.05066	1.03609	up
MW0157594	Thr-Asp-Trp	苏氨酸-天冬氨酸-色氨酸	Amino acids and derivatives	氨基酸及其衍生物	Amino acids and derivatives	氨基酸及其衍生物	C19H24N4O7	2	0.8639	-	116335	152172	138893	284848	295149	303444	1.38808	0.000898136	0.0138381	2.16849	1.11669	up
MW0152205	Leu-Ala-Phe	L-亮氨酸-L-丙氨酸-L-苯丙氨酸	Amino acids and derivatives	氨基酸及其衍生物	Amino acids and derivatives	氨基酸及其衍生物	C18H27N3O4	2	0.8591	-	5912.18	5558.21	5424.22	2928.54	1775.52	2385.04	1.34572	0.0041328	0.030432	0.419607	-1.25289	down
MW0146090	Asp-Gln-Tyr	L-天冬氨酰-L-谷氨酰胺-L-酪氨酸	Amino acids and derivatives	氨基酸及其衍生物	Amino acids and derivatives	氨基酸及其衍生物	C18H24N4O8	2	0.8519	-	28712.5	24978.3	22853.3	77531.2	77082.3	82579.6	1.4072	2.64119e-05	0.00272587	3.09878	1.6317	up
MW0153487	Met-Ala-Leu	L-蛋氨酸-L-丙氨酸-L-亮氨酸	Amino acids and derivatives	氨基酸及其衍生物	Amino acids and derivatives	氨基酸及其衍生物	C14H27N3O4S1	2	0.8388	-	5606.35	6299.06	3197.02	20406.7	20936	10814.2	1.27541	0.0548163	0.151152	3.45354	1.78808	up
MW0151154	His-Val-Ser	L-组氨酸-L-缬氨酸-L-丝氨酸	Amino acids and derivatives	氨基酸及其衍生物	Amino acids and derivatives	氨基酸及其衍生物	C14H23N5O5	2	0.8123	-	34829	25251.3	30817.6	58174.2	62140.3	64825.9	1.36709	0.00126425	0.0163748	2.0368	1.0263	up
MW0145569	Arg-Val-Phe	L-精氨酰-L-缬氨酰-L-苯丙氨酸	Amino acids and derivatives	氨基酸及其衍生物	Amino acids and derivatives	氨基酸及其衍生物	C20H32N6O4	2	0.8113	-	5173.27	5179.56	4637.23	23393.1	21400	16432.9	1.39996	0.0169669	0.0703116	4.08444	2.03014	up
MW0158264	Trp-Trp-Glu	色氨酸-色氨酸-谷氨酸	Amino acids and derivatives	氨基酸及其衍生物	Amino acids and derivatives	氨基酸及其衍生物	C27H29N5O6	2	0.8112	-	59431.7	62292.8	68317.8	122348	126666	132684	1.40489	9.94617e-05	0.0045602	2.00849	1.00611	up
MW0151135	His-Tyr-Ser	L-组氨酸-L-酪氨酸-L-丝氨酸	Amino acids and derivatives	氨基酸及其衍生物	Amino acids and derivatives	氨基酸及其衍生物	C18H23N5O6	2	0.8061	-	1558.41	960.67	1307.08	2744.3	6163.56	3212.37	1.26091	0.119349	0.25468	3.16773	1.66345	up
MW0105871	Asp-Phe-Arg	L-天冬氨酰-L-苯丙氨酰-L-精氨酸	Amino acids and derivatives	氨基酸及其衍生物	Amino acids and derivatives	氨基酸及其衍生物	C19H28N6O6	2	0.8038	-	12538.5	17844.8	15676.9	72808.7	48082.8	73816.3	1.37736	0.0245312	0.0887108	4.22724	2.07972	up
MW0158103	Trp-Asn-Gly	色氨酸-天冬酰胺-甘氨酸	Amino acids and derivatives	氨基酸及其衍生物	Amino acids and derivatives	氨基酸及其衍生物	C17H21N5O5	2	0.7998	-	127290	131094	139043	356200	378248	373657	1.41503	7.25764e-05	0.00401875	2.7882	1.47933	up
MW0144701	Ala-Phe-Tyr	L-丙氨酰-L-苯丙氨酰-L-酪氨酸	Amino acids and derivatives	氨基酸及其衍生物	Amino acids and derivatives	氨基酸及其衍生物	C21H25N3O5	2	0.799	-	23863.7	34150.2	29177.1	13556.8	9830.11	13513	1.3402	0.0182157	0.0737377	0.423208	-1.24056	down
MW0103299	(-)-Neplanocin A	奈拉诺星 A	Nucleotides and derivatives	核苷酸及其衍生物	Nucleotides and derivatives	核苷酸及其衍生物	C11H13N5O3	2	0.798	-	99251.3	81885.6	84478.9	167668	233863	412908	1.26182	0.129063	0.269249	3.06623	1.61647	up
MW0150161	Glu-Thr-His	谷氨酸-苏氨酸-组氨酸	Amino acids and derivatives	氨基酸及其衍生物	Amino acids and derivatives	氨基酸及其衍生物	C15H23N5O7	2	0.7951	-	33198.7	6915.96	28570.7	79658.8	70222.1	87741.4	1.16106	0.00706468	0.0412709	3.45957	1.79059	up
MW0144556	Ala-Glu-Asp	L-丙氨酰-L-谷氨酰-L-天冬氨酸	Amino acids and derivatives	氨基酸及其衍生物	Amino acids and derivatives	氨基酸及其衍生物	C12H19N3O8	2	0.7911	-	413210	464143	427459	1.05965e+06	1.15333e+06	947699	1.40203	0.00634041	0.0391133	2.42232	1.27639	up
MW0105652	Arg-Gln-Arg	L-精氨酰-L-谷氨酰胺-L-精氨酸	Amino acids and derivatives	氨基酸及其衍生物	Amino acids and derivatives	氨基酸及其衍生物	C17H34N10O5	2	0.7832	-	22690.5	13821.7	16387.6	53629.7	60514.2	54216.3	1.37383	0.000426566	0.00983522	3.18262	1.67022	up
MW0159048	Val-Ile-Thr	缬氨酸-异亮氨酸-苏氨酸	Amino acids and derivatives	氨基酸及其衍生物	Amino acids and derivatives	氨基酸及其衍生物	C15H29N3O5	2	0.7811	-	11411.5	7439.42	9440.7	17313.1	22734.9	20749.8	1.32507	0.00678562	0.0403006	2.14897	1.10365	up
MW0105792	Asn-Ser-Lys	L-天冬酰胺-L-丝氨酰-L-赖氨酸	Amino acids and derivatives	氨基酸及其衍生物	Amino acids and derivatives	氨基酸及其衍生物	C13H25N5O6	2	0.7804	-	3.41448e+07	3.45241e+07	3.65819e+07	1.73475e+07	1.67028e+07	1.77448e+07	1.41356	0.000480526	0.010542	0.492111	-1.02294	down
MW0145473	Arg-Phe-Val	L-精氨酰-L-苯丙氨酰-L-缬氨酸	Amino acids and derivatives	氨基酸及其衍生物	Amino acids and derivatives	氨基酸及其衍生物	C20H32N6O4	2	0.7801	-	4999.54	8757.5	5150.86	25379.4	18564	15873.7	1.32026	0.0261231	0.0924114	3.1636	1.66157	up
MW0105574	Propionic acid, 2-amino-3-ureido-	阿尔齐嗪	Organic acids	有机酸	Organic acids	有机酸	C4H9N3O3	2	0.78	-	593.87	2507.22	1406.6	3632.57	3165.11	2865.27	1.04133	0.0745282	0.187387	2.14366	1.10008	up
MW0109892	Thr-Pro-Lys	苏氨酸-脯氨酸-赖氨酸	Amino acids and derivatives	氨基酸及其衍生物	Amino acids and derivatives	氨基酸及其衍生物	C15H28N4O5	2	0.7779	-	23931.3	27467.1	25528.1	11121.8	12102.9	14017.3	1.38609	0.000673942	0.012468	0.484124	-1.04655	down
MW0105883	Asp-Val-Arg	Asp-Val-Arg	Amino acids and derivatives	氨基酸及其衍生物	Amino acids and derivatives	氨基酸及其衍生物	C15H28N6O6	2	0.7732	-	23165.2	23484.7	28460.3	76.86	396.56	5410.34	1.18891	0.000690198	0.0124932	0.078335	-3.6742	down
MW0110180	Tumonoic acid I	Tumonoic acid I	Organic acids	有机酸	Organic acids	有机酸	C27H47NO7	2	0.7713	-	115637	111089	59736.1	40653.6	44262.9	45998.4	1.22367	0.100497	0.228553	0.457006	-1.12971	down
MW0150924	His-Glu-Phe	组氨酸-谷氨酸-苯丙氨酸	Amino acids and derivatives	氨基酸及其衍生物	Amino acids and derivatives	氨基酸及其衍生物	C20H25N5O6	2	0.7657	-	3443.76	3883.61	3761.84	10603.7	10149.9	12096.7	1.40795	0.00476343	0.0330536	2.96236	1.56675	up
MW0109089	Phe-Ala-Leu	Phe-Ala-Leu	Amino acids and derivatives	氨基酸及其衍生物	Amino acids and derivatives	氨基酸及其衍生物	C18H27N3O4	2	0.7649	-	8512.72	4611.02	5869.94	3221.18	3168.78	1219.7	1.13104	0.0599506	0.160477	0.400642	-1.31962	down
MW0014461	Alkynyl 4-hydroxy-2-nonenal	4-羟基壬醛炔	Organic acids	有机酸	Organic acids	有机酸	C9H12O2	2	0.7634	-	71013.6	92537.5	72824.6	18542.5	22983	41797.6	1.28364	0.00678701	0.0403006	0.352502	-1.50429	down
MW0155347	Phe-Thr-Asp	苯丙氨酰-苏氨酰-天冬氨酸	Amino acids and derivatives	氨基酸及其衍生物	Amino acids and derivatives	氨基酸及其衍生物	C17H23N3O7	2	0.7628	-	176233	174276	172687	361201	356820	368261	1.41714	0.000100877	0.0045602	2.07624	1.05397	up
MW0145899	Asn-Thr-Gln	L-天冬酰胺-L-苏氨酰-L-谷氨酰胺	Amino acids and derivatives	氨基酸及其衍生物	Amino acids and derivatives	氨基酸及其衍生物	C13H23N5O7	2	0.7621	-	32989.9	30020.7	43417.4	68642.4	102486	110137	1.32433	0.0347878	0.11115	2.64277	1.40205	up
MW0151683	Ile-Phe	L-异亮氨酸-L-苯丙氨酸	Amino acids and derivatives	氨基酸及其衍生物	Amino acids and derivatives	氨基酸及其衍生物	C15H22N2O3	2	0.762	-	75842.8	71833.6	70990.8	36858.2	28664.5	33836.4	1.3922	0.000419004	0.00982709	0.454385	-1.13801	down
MW0145575	Arg-Val-Tyr	L-精氨酰-L-缬氨酰-L-酪氨酸	Amino acids and derivatives	氨基酸及其衍生物	Amino acids and derivatives	氨基酸及其衍生物	C20H32N6O5	2	0.7619	-	17804.1	17817.6	23708.4	50721.8	44312	47791	1.38071	0.000509632	0.0106548	2.40729	1.26741	up
MW0158457	Tyr-Glu-Glu	酪氨酸谷氨酰谷氨酸	Amino acids and derivatives	氨基酸及其衍生物	Amino acids and derivatives	氨基酸及其衍生物	C19H25N3O9	2	0.7617	-	6791.94	8117.86	7918.25	14577.6	18129.1	18743.9	1.37903	0.0119134	0.0560273	2.25383	1.17238	up
MW0156983	Ser-Val-Phe	丝氨酰-缬氨酰-苯丙氨酸	Amino acids and derivatives	氨基酸及其衍生物	Amino acids and derivatives	氨基酸及其衍生物	C17H25N3O5	2	0.7589	-	45765	45798.7	48171.9	29674.1	20126	18819.8	1.32066	0.0161928	0.0681668	0.491069	-1.026	down
MW0155873	Pro-Gly-Val	脯氨酰-甘氨酰-缬氨酸	Amino acids and derivatives	氨基酸及其衍生物	Amino acids and derivatives	氨基酸及其衍生物	C12H21N3O4	2	0.7588	-	621.8	1558.84	626.51	243.34	171.37	80.27	1.25967	0.128821	0.268976	0.176328	-2.50366	down
MW0145374	Arg-His-His	L-精氨酰-L-组氨酰-L-组氨酸	Amino acids and derivatives	氨基酸及其衍生物	Amino acids and derivatives	氨基酸及其衍生物	C18H28N10O4	2	0.7581	-	636.1	718.17	587.7	3062.63	911.86	1124.75	1.04167	0.263636	0.429938	2.62581	1.39276	up
MW0155318	Phe-Pro-Ser	苯丙氨酰-脯氨酰-丝氨酸	Amino acids and derivatives	氨基酸及其衍生物	Amino acids and derivatives	氨基酸及其衍生物	C17H23N3O5	2	0.756	-	13878.5	18437.4	13782.9	50046.5	45933.5	52526.6	1.39631	0.000210024	0.00674954	3.22149	1.68773	up
MW0153541	Met-Glu-Gln	蛋氨酸-谷氨酸-谷氨酰胺	Amino acids and derivatives	氨基酸及其衍生物	Amino acids and derivatives	氨基酸及其衍生物	C15H26N4O7S1	2	0.7552	-	10337.2	12650.3	15234.3	35786.9	46776.4	18072.2	1.17721	0.126885	0.265617	2.63293	1.39667	up
MW0158438	Tyr-Gln-Leu	酪氨酸-谷氨酰胺-亮氨酸	Amino acids and derivatives	氨基酸及其衍生物	Amino acids and derivatives	氨基酸及其衍生物	C20H30N4O6	2	0.7547	-	225686	289603	261667	83396.2	63574.3	54923.2	1.3877	0.00335285	0.0276796	0.259852	-1.94424	down
MW0107100	Gly-Val-Gln	甘氨酸-缬氨酸-谷酰胺	Amino acids and derivatives	氨基酸及其衍生物	Amino acids and derivatives	氨基酸及其衍生物	C12H22N4O5	2	0.7547	-	44882.3	11591.7	44990.9	84779.2	85187.3	85973.3	1.09266	0.043449	0.129116	2.52245	1.33482	up
MW0150879	His-Asp-Tyr	组氨酸-天门冬氨酸-酪氨酸	Amino acids and derivatives	氨基酸及其衍生物	Amino acids and derivatives	氨基酸及其衍生物	C19H23N5O7	2	0.7545	-	52765.8	78820.6	67552.9	9792.43	15543.8	19541.2	1.35457	0.0124641	0.0575989	0.225357	-2.14972	down
MW0152471	Leu-Pro-Phe	L-亮氨酸-L-脯氨酸-L-苯丙氨酸	Amino acids and derivatives	氨基酸及其衍生物	Amino acids and derivatives	氨基酸及其衍生物	C20H29N3O4	2	0.7544	-	12250.9	10923.1	15953.9	5081.33	2945.89	5987.86	1.28951	0.0143306	0.063386	0.358186	-1.48122	down
MW0155281	Phe-Lys-Tyr	苯丙氨酰-赖氨酰-酪氨酸	Amino acids and derivatives	氨基酸及其衍生物	Amino acids and derivatives	氨基酸及其衍生物	C24H32N4O5	2	0.7543	-	2214.84	6523.43	3160.11	12351.1	9887.51	15352.5	1.24057	0.0150037	0.0652098	3.15935	1.65963	up
MW0150329	Gly-Asp-Phe	甘氨酸-天门冬氨酸-苯丙氨酸	Amino acids and derivatives	氨基酸及其衍生物	Amino acids and derivatives	氨基酸及其衍生物	C15H19N3O6	2	0.7542	-	21631.7	26443.7	26641	57452.5	61870.9	57926.2	1.39851	0.000108427	0.00473149	2.3723	1.24629	up
MW0155088	Phe-Arg-Asp	苯丙氨酰精氨酰天冬氨酸	Amino acids and derivatives	氨基酸及其衍生物	Amino acids and derivatives	氨基酸及其衍生物	C19H28N6O6	2	0.7536	-	90327.3	100471	83941.9	200712	201093	215182	1.40402	7.27371e-05	0.00401875	2.24571	1.16717	up
MW0155125	Phe-Asp-Glu	苯丙氨酰-天冬氨酰-谷氨酸	Amino acids and derivatives	氨基酸及其衍生物	Amino acids and derivatives	氨基酸及其衍生物	C18H23N3O8	2	0.7536	-	14229.8	13091.6	14606.9	30774.2	27432.5	29806.8	1.40615	0.00109656	0.015333	2.09914	1.0698	up
MW0155129	Phe-Asp-His	苯丙氨酰-天冬氨酰-组氨酸	Amino acids and derivatives	氨基酸及其衍生物	Amino acids and derivatives	氨基酸及其衍生物	C19H23N5O6	2	0.7527	-	1430.98	5309.94	6938.46	11678.9	10043.3	13693.5	1.06851	0.0268369	0.0937128	2.58898	1.37238	up
MW0107759	Leu-Thr-Asp	L-亮氨酸-L-苏氨酸-L-天冬氨酸	Amino acids and derivatives	氨基酸及其衍生物	Amino acids and derivatives	氨基酸及其衍生物	C14H25N3O7	2	0.7517	-	38229.9	38966.6	39441.3	17212	19201.2	18239.7	1.41246	3.44851e-05	0.00315037	0.46857	-1.09366	down
MW0158607	Tyr-Ser-Leu	酪氨酸-丝氨酸-亮氨酸	Amino acids and derivatives	氨基酸及其衍生物	Amino acids and derivatives	氨基酸及其衍生物	C18H27N3O6	2	0.7509	-	148828	116261	125268	443235	530255	439870	1.40266	0.00400663	0.0298068	3.62069	1.85627	up
MW0150873	His-Asp-His	组氨酸-天门冬氨酸-组氨酸	Amino acids and derivatives	氨基酸及其衍生物	Amino acids and derivatives	氨基酸及其衍生物	C16H21N7O6	2	0.7508	-	6251.94	25908	5650.19	26218.5	24755	27694.6	1.00621	0.17543	0.330916	2.08061	1.05701	up
MW0158362	Tyr-Ala-Ser	酪氨酸-丙氨酸-丝氨酸	Amino acids and derivatives	氨基酸及其衍生物	Amino acids and derivatives	氨基酸及其衍生物	C15H21N3O6	2	0.7501	-	32433.8	27332.5	21698.7	10024.8	12328.1	9444.65	1.35635	0.0260478	0.0922958	0.390322	-1.35726	down
MW0158236	Trp-Ser-Ala	色氨酸-丝氨酸-丙氨酸	Amino acids and derivatives	氨基酸及其衍生物	Amino acids and derivatives	氨基酸及其衍生物	C17H22N4O5	2	0.7494	-	5964.83	14444.8	14477.9	26014.5	29371	31043.1	1.2096	0.0124358	0.0575506	2.47735	1.3088	up
MW0106255	Cys-Glu-Lys	半胱氨酸-谷氨酸-赖氨酸	Amino acids and derivatives	氨基酸及其衍生物	Amino acids and derivatives	氨基酸及其衍生物	C14H26N4O6S1	2	0.7491	-	56658.8	66063.3	72724.6	172332	188516	187909	1.40172	8.43384e-05	0.00426559	2.80771	1.48939	up
MW0158565	Tyr-Phe-Gln	酪氨酸-苯丙氨酸-谷氨酰胺	Amino acids and derivatives	氨基酸及其衍生物	Amino acids and derivatives	氨基酸及其衍生物	C23H28N4O6	2	0.749	-	139292	170245	144074	352424	346831	372826	1.40156	0.000100456	0.0045602	2.36343	1.24088	up
MW0156984	Ser-Val-Ser	丝氨酰-缬氨酰-丝氨酸	Amino acids and derivatives	氨基酸及其衍生物	Amino acids and derivatives	氨基酸及其衍生物	C11H21N3O6	2	0.7486	-	65357.8	69879.8	82892.2	135787	174277	186287	1.36083	0.0173926	0.0715287	2.27548	1.18617	up
MW0107438	Ile-Glu-Arg	L-异亮氨酸-L-谷氨酸-L-精氨酸	Amino acids and derivatives	氨基酸及其衍生物	Amino acids and derivatives	氨基酸及其衍生物	C17H32N6O6	2	0.7478	-	20922.5	16554.4	24016.9	3621.68	15674	10059.7	1.0015	0.0710599	0.18183	0.477371	-1.06682	down
MW0158164	Trp-His-Phe	色氨酸-组氨酸-苯丙氨酸	Amino acids and derivatives	氨基酸及其衍生物	Amino acids and derivatives	氨基酸及其衍生物	C26H28N6O4	2	0.7477	-	4100.17	3783.63	3573.6	8024.91	8528.65	6761.49	1.38297	0.0120154	0.0562045	2.03493	1.02498	up
MW0152212	Leu-Ala-Tyr	L-亮氨酸-L-丙氨酸-L-酪氨酸	Amino acids and derivatives	氨基酸及其衍生物	Amino acids and derivatives	氨基酸及其衍生物	C18H27N3O5	2	0.7475	-	96265.5	86908.9	76853.2	42151	29126.7	39255	1.35713	0.00285122	0.0257839	0.425081	-1.23419	down
MW0156053	Pro-Val-Phe	脯氨酰-缬氨酰-苯丙氨酸	Amino acids and derivatives	氨基酸及其衍生物	Amino acids and derivatives	氨基酸及其衍生物	C19H27N3O4	2	0.7405	-	58743.4	57022.6	58144.7	16866.5	30054.4	17155.9	1.33084	0.0129231	0.058954	0.368446	-1.44047	down
MW0153000	Lys-Ile-Ala	L-赖氨酸-L-异亮氨酸-L-丙氨酸	Amino acids and derivatives	氨基酸及其衍生物	Amino acids and derivatives	氨基酸及其衍生物	C15H30N4O4	2	0.74	-	53919.4	82261.9	34597.5	119645	113336	154958	1.20805	0.0189516	0.0753198	2.27159	1.1837	up
MW0155400	Phe-Val-Asn	苯丙氨酰-缬氨酰-天冬酰胺	Amino acids and derivatives	氨基酸及其衍生物	Amino acids and derivatives	氨基酸及其衍生物	C18H26N4O5	2	0.7396	-	7910.03	1214.07	3282.54	7865.47	13580.6	13958.9	1.05881	0.0516782	0.145225	2.85371	1.51284	up
MW0152869	Lys-Arg-Leu	L-赖氨酸-L-精氨酸-L-亮氨酸	Amino acids and derivatives	氨基酸及其衍生物	Amino acids and derivatives	氨基酸及其衍生物	C18H37N7O4	2	0.7383	-	516.68	367.88	600.13	745.44	1102.06	1146.92	1.23309	0.0384892	0.118943	2.01687	1.01211	up
MW0148003	Cys-Gln-Ser	半胱氨酸-谷酰氨-丝氨酸	Amino acids and derivatives	氨基酸及其衍生物	Amino acids and derivatives	氨基酸及其衍生物	C11H20N4O6S1	2	0.7376	-	113.31	52.57	943.21	7386.9	5344.63	14745.2	1.28039	0.089821	0.212989	24.7741	4.63076	up
MW0151058	His-Pro-Asp	组氨酸-脯氨酸-天门冬氨酸	Amino acids and derivatives	氨基酸及其衍生物	Amino acids and derivatives	氨基酸及其衍生物	C15H21N5O6	2	0.7375	-	135173	156798	154965	62732	63413.6	39212.7	1.34792	0.000960285	0.0142552	0.369982	-1.43447	down
MW0155308	Phe-Phe-Tyr	苯丙氨酰-苯丙氨酰-酪氨酸	Amino acids and derivatives	氨基酸及其衍生物	Amino acids and derivatives	氨基酸及其衍生物	C27H29N3O5	2	0.7366	-	22923	25121.2	23713.6	10531.6	3208.66	7684.38	1.24797	0.0105664	0.0518905	0.298569	-1.74386	down
MW0153573	Met-His-Tyr	甲硫氨酰-组氨酰-酪氨酸	Amino acids and derivatives	氨基酸及其衍生物	Amino acids and derivatives	氨基酸及其衍生物	C20H27N5O5S1	2	0.7364	-	53735.5	43476.3	46074.3	25445.5	15010.7	29029.4	1.23865	0.011319	0.0539562	0.484943	-1.04411	down
MW0155396	Phe-Tyr-Tyr	苯丙氨酰-酪氨酰-酪氨酸	Amino acids and derivatives	氨基酸及其衍生物	Amino acids and derivatives	氨基酸及其衍生物	C27H29N3O6	2	0.7362	-	48055.4	83405.5	49593.8	14594.8	21194.4	33779	1.20828	0.0653302	0.17135	0.384238	-1.37993	down
MW0145479	Arg-Pro-Gly	L-精氨酰-L-脯氨酰-甘氨酸	Amino acids and derivatives	氨基酸及其衍生物	Amino acids and derivatives	氨基酸及其衍生物	C13H24N6O4	2	0.7355	-	6157.63	4953.92	13300.6	37459.3	23021.8	22125.4	1.24915	0.0402453	0.122853	3.38383	1.75866	up
MW0151021	His-Lys-Val	组氨酸-赖氨酸-缬氨酸	Amino acids and derivatives	氨基酸及其衍生物	Amino acids and derivatives	氨基酸及其衍生物	C17H30N6O4	2	0.7352	-	7998.21	8927.52	5731.36	26452.1	18174.1	15807.2	1.30837	0.0502168	0.14283	2.66731	1.41538	up
MW0156722	Ser-Glu-Ala	丝氨酰-谷氨酰-丙氨酸	Amino acids and derivatives	氨基酸及其衍生物	Amino acids and derivatives	氨基酸及其衍生物	C11H19N3O7	2	0.7321	-	1289	6572.74	5386.16	16934.8	18929.5	18018.2	1.19535	0.00764107	0.0429551	4.06725	2.02405	up
MW0144789	Ala-Val-Asn	L-丙氨酰-L-缬氨酰-L-天冬酰胺	Amino acids and derivatives	氨基酸及其衍生物	Amino acids and derivatives	氨基酸及其衍生物	C12H22N4O5	2	0.7302	-	70078.1	88972.3	83355.3	37362.9	36181.8	42040.7	1.38209	0.0111597	0.0537032	0.476826	-1.06846	down
MW0153689	Met-Trp-His	甲硫氨酰-色氨酸-组氨酸	Amino acids and derivatives	氨基酸及其衍生物	Amino acids and derivatives	氨基酸及其衍生物	C22H28N6O4S1	2	0.7273	-	11608.4	25934.5	24583.6	6290.07	9198.64	4515.66	1.21897	0.0810569	0.198431	0.321994	-1.63489	down
MW0109323	Pro-Leu-Lys	脯氨酰-亮氨酰-赖氨酸	Amino acids and derivatives	氨基酸及其衍生物	Amino acids and derivatives	氨基酸及其衍生物	C17H32N4O4	2	0.7267	-	7375.96	4077.08	8375.75	2895.27	2065.84	2710.84	1.25021	0.0841722	0.203908	0.38691	-1.36993	down
MW0156326	R-4-benzyl-3-isobutyryloxazolidin-2-one	R-4-苄基-3-异丁酰恶唑烷-2-	Benzene and substituted derivatives	苯及其衍生物	Benzene and substituted derivatives	苯及其衍生物	C14H17NO3	2	0.7248	-	21777.6	17892.6	3761.6	42149.4	48636.4	63063.2	1.12891	0.0115514	0.0547032	3.54231	1.82469	up
MW0158405	Tyr-Asp-Ala	酪氨酸-天冬氨酸-丙氨酸	Amino acids and derivatives	氨基酸及其衍生物	Amino acids and derivatives	氨基酸及其衍生物	C16H21N3O7	2	0.7246	-	34258.2	34680.1	40249.9	9200.66	21738.9	19955.1	1.17644	0.022372	0.084131	0.466119	-1.10123	down
MW0145475	Arg-Pro-Ala	L-精氨酰-L-脯氨酰-L-丙氨酸	Amino acids and derivatives	氨基酸及其衍生物	Amino acids and derivatives	氨基酸及其衍生物	C14H26N6O4	2	0.7246	-	17860.4	26201.9	21924	46241.9	40806.5	50295.1	1.34182	0.0030518	0.0265777	2.08139	1.05755	up
MW0145477	Arg-Pro-Asp	L-精氨酰-L-脯氨酰-L-天冬氨酸	Amino acids and derivatives	氨基酸及其衍生物	Amino acids and derivatives	氨基酸及其衍生物	C15H26N6O6	2	0.7234	-	190926	215030	220210	82118.3	84245.3	85430.6	1.41077	0.00479071	0.0330886	0.40212	-1.3143	down
MW0156052	Pro-Val-Met	脯氨酰-缬氨酰-蛋氨酸	Amino acids and derivatives	氨基酸及其衍生物	Amino acids and derivatives	氨基酸及其衍生物	C15H27N3O4S1	2	0.7225	-	1738.63	4520.64	6609.54	1143.16	1127.75	1168.21	1.17648	0.155722	0.306912	0.267245	-1.90377	down
MW0156754	Ser-Gly-His	L-丝氨酰-甘氨酰-L-组氨酸	Amino acids and derivatives	氨基酸及其衍生物	Amino acids and derivatives	氨基酸及其衍生物	C11H17N5O5	2	0.7214	-	30265.8	36047.2	33017.3	166321	169583	181742	1.41436	0.000347216	0.00881875	5.21136	2.38166	up
MW0158609	Tyr-Ser-Met	酪氨酸-丝氨酸-甲硫氨酸	Amino acids and derivatives	氨基酸及其衍生物	Amino acids and derivatives	氨基酸及其衍生物	C17H25N3O6S1	2	0.7208	-	54588.1	38373.7	44471.1	99034.9	95187.5	99226.3	1.36949	0.00524783	0.0347822	2.13521	1.09438	up
MW0153688	Met-Trp-Glu	甲硫氨酰-色氨酸-谷氨酸	Amino acids and derivatives	氨基酸及其衍生物	Amino acids and derivatives	氨基酸及其衍生物	C21H28N4O6S1	2	0.7204	-	35936	30793.6	37388.4	106777	105890	85767.9	1.39617	0.00715133	0.0414724	2.86632	1.5192	up
MW0114997	N-ethyl-N-Methylcathinone	N-乙基-N-甲基卡西酮	Others	其它类	Ketone compounds	酮类化合物	C12H17NO	2	0.7196	-	40562.1	11127.9	44509.4	74202.6	75539.6	142322	1.10232	0.0830676	0.201858	3.03603	1.60219	up
MW0151005	His-Lys-Ala	组氨酸-赖氨酸-丙氨酸	Amino acids and derivatives	氨基酸及其衍生物	Amino acids and derivatives	氨基酸及其衍生物	C15H26N6O4	2	0.7184	-	41615.3	42311.8	43684.8	16983.3	14429	23226.5	1.34919	0.00857054	0.0459403	0.428165	-1.22376	down
MW0156778	Ser-His-Met	丝氨酰-组氨酰-蛋氨酸	Amino acids and derivatives	氨基酸及其衍生物	Amino acids and derivatives	氨基酸及其衍生物	C14H23N5O5S1	2	0.7183	-	335461	340983	362356	1.1185e+06	1.13519e+06	1.22819e+06	1.41503	0.00105132	0.0149906	3.35183	1.74495	up
MW0110365	Val-Pro-Lys	缬氨酸-脯氨酸-赖氨酸	Amino acids and derivatives	氨基酸及其衍生物	Amino acids and derivatives	氨基酸及其衍生物	C16H30N4O4	2	0.7175	-	4972.27	4673.46	1663.42	18744.9	12851.8	7792.48	1.17568	0.0855747	0.206054	3.48295	1.80031	up
MW0144451	Ala-Ala-Ala-Arg-Phe	L-丙氨酰-L-丙氨酰-L-丙氨酰-L-精氨酰-L-苯丙氨酰-	Amino acids and derivatives	氨基酸及其衍生物	Amino acids and derivatives	氨基酸及其衍生物	C24H38N8O6	2	0.7168	-	13771.6	10893.4	9654.77	5019.77	3004.85	4743	1.32317	0.0135996	0.0611721	0.372019	-1.42655	down
MW0109129	Phe-Pro-Glu	苯丙氨酰-脯氨酰-谷氨酸	Amino acids and derivatives	氨基酸及其衍生物	Amino acids and derivatives	氨基酸及其衍生物	C19H25N3O6	2	0.716	-	38107.3	60388.3	33584.8	7368.48	13035	14219.1	1.31389	0.0516855	0.145225	0.262133	-1.93163	down
MW0149829	Gln-Trp-Glu	谷酰氨-色氨酸-谷氨酸	Amino acids and derivatives	氨基酸及其衍生物	Amino acids and derivatives	氨基酸及其衍生物	C21H27N5O7	2	0.7152	-	107819	105896	110262	60046.6	25544.5	28709.8	1.27868	0.0227296	0.0848662	0.352806	-1.50305	down
MW0151086	His-Ser-Ser	L-组氨酸-L-丝氨酸-L-丝氨酸	Amino acids and derivatives	氨基酸及其衍生物	Amino acids and derivatives	氨基酸及其衍生物	C12H19N5O6	2	0.7139	-	32142	34112.5	27676.8	298414	95587.4	177540	1.31951	0.113829	0.246706	6.08468	2.60518	up
MW0155858	Pro-Glu-Met	脯氨酰-谷氨酰-蛋氨酸	Amino acids and derivatives	氨基酸及其衍生物	Amino acids and derivatives	氨基酸及其衍生物	C15H25N3O6S1	2	0.7138	-	66408.2	68424	65530.4	21709.2	33584.2	36382.2	1.31662	0.0127008	0.0583609	0.457549	-1.128	down
MW0157674	Thr-Ile-Ala	苏氨酰-异亮氨酰-丙氨	Amino acids and derivatives	氨基酸及其衍生物	Amino acids and derivatives	氨基酸及其衍生物	C13H25N3O5	2	0.7129	-	4750.23	6486.69	5200.05	2701.59	2815.54	2611.94	1.36765	0.0321481	0.105977	0.49456	-1.01578	down
MW0107711	Leu-Asp-Gln	L-亮氨酸-L-天冬氨酸-L-谷氨酰胺	Amino acids and derivatives	氨基酸及其衍生物	Amino acids and derivatives	氨基酸及其衍生物	C15H26N4O7	2	0.7127	-	61014	61680.8	68268.7	27241.6	26954.5	31004	1.40378	0.00071517	0.0126829	0.446159	-1.16437	down
MW0158119	Trp-Asp-Val	色氨酸-天冬氨酸-缬氨酸	Amino acids and derivatives	氨基酸及其衍生物	Amino acids and derivatives	氨基酸及其衍生物	C20H26N4O6	2	0.7118	-	39959.8	42276.7	37500.1	3080.55	13089.1	13488	1.20695	0.00604781	0.0378717	0.247691	-2.01338	down
MW0110064	Trp-His-Lys	色氨酸-组氨酸-赖氨酸	Amino acids and derivatives	氨基酸及其衍生物	Amino acids and derivatives	氨基酸及其衍生物	C23H31N7O4	2	0.7097	-	4604.32	5066.42	11166.7	1701.04	950.11	4750.57	1.03753	0.157275	0.308943	0.355213	-1.49324	down
MW0155832	Pro-Gln-Glu	脯氨酰-谷氨酰胺-谷氨酸	Amino acids and derivatives	氨基酸及其衍生物	Amino acids and derivatives	氨基酸及其衍生物	C15H24N4O7	2	0.7095	-	58225.5	87977.7	133103	36117.7	17295.7	63140.4	1.03601	0.114875	0.24841	0.417297	-1.26085	down
MW0155312	Phe-Pro-Cys	苯丙氨酰-脯氨酰-半胱氨酸	Amino acids and derivatives	氨基酸及其衍生物	Amino acids and derivatives	氨基酸及其衍生物	C17H23N3O4S1	2	0.7039	-	554.44	702.11	1553.91	2891.96	12095.3	10449.2	1.25961	0.115212	0.248858	9.05063	3.17802	up
MW0155829	Pro-Gln-Cys	脯氨酰-谷氨酰胺-半胱氨酸	Amino acids and derivatives	氨基酸及其衍生物	Amino acids and derivatives	氨基酸及其衍生物	C13H22N4O5S1	2	0.7035	-	74044.2	85242.3	83827.6	234781	247699	241834	1.41252	6.45419e-06	0.00157565	2.97932	1.57498	up
MW0158464	Tyr-Glu-Thr	酪氨酸-谷氨酸-苏氨酸	Amino acids and derivatives	氨基酸及其衍生物	Amino acids and derivatives	氨基酸及其衍生物	C18H25N3O8	2	0.7026	-	286	224.53	229.41	6505.14	4008.8	406.35	1.11653	0.19527	0.353268	14.7583	3.88346	up
MW0153136	Lys-Ser-Thr	L-赖氨酸-L-丝氨酸-L-苏氨酸	Amino acids and derivatives	氨基酸及其衍生物	Amino acids and derivatives	氨基酸及其衍生物	C13H26N4O6	2	0.7022	-	22373	20561.4	25428	61971.5	61949.3	62219.9	1.40712	0.00125956	0.0163466	2.72285	1.44512	up
MW0152961	Lys-Glu-Phe	L-赖氨酸-L-谷氨酸-L-苯丙氨酸	Amino acids and derivatives	氨基酸及其衍生物	Amino acids and derivatives	氨基酸及其衍生物	C20H30N4O6	2	0.7	-	35337.3	37571.6	42175.5	77657.3	101648	55924.9	1.25596	0.0904518	0.213628	2.04398	1.03138	up
ZINC70455326	(2S,3R,4S)-3-ethenyl-4-[2-(3,4,5-trihydroxybenzoyl)oxyethyl]-2-[(2S,3R,4S,5S,6R)-3,4,5-trihydroxy-6-(hydroxymethyl)oxan-2-yl]oxy-3,4-dihydro-2H-pyran-5-carboxylic acid	（2S，3R，4S)-3-乙烯基-4-[2-(3，4，5-三羟基苯甲酰基）氧乙基]-2-[（2S，3R，4S，5S，6R)-3，4，5-三羟基-6-(羟甲基）恶烷-2-基]氧-3，4-二氢-2H-吡喃-5-羧酸	Organic acids	有机酸	Organic acids	有机酸	C23H28O14	3	0.9956	-	5542.58	4749.57	628.36	11463.8	20344.8	15056.6	1.10391	0.0241897	0.0878466	4.29149	2.10148	up
MW0140100	(3S,4R)-3,4-dihydrophenanthrene-3,4-diol	（+)-顺-3,4-二氢菲-3,4-二醇;顺-3,4-二羟基-3,4-二氢菲	Benzene and substituted derivatives	苯及其衍生物	Benzene and substituted derivatives	苯及其衍生物	C14H12O2	3	0.9834	-	234.84	1225.87	2256.08	12049.9	10173.9	14502.5	1.25837	0.00510338	0.0342437	9.88117	3.30468	up
MW0166808	2-Acetyl-3-decanoyl-3',4-di(isovaleryl)sucrose	2-Acetyl-3-decanoyl-3',4-di(isovaleryl)sucrose	Others	其它类	Lactones	内酯类化合物	C34H58O15	3	0.9802	-	35291.4	55197.5	46417.4	122430	92986	97875.6	1.32914	0.00881583	0.0468688	2.28837	1.19432	up
MW0163380	beta-D-gentiobiosyl crocetin(1-)	β-D-龙胆二糖基藏红花素(1-)	Others	其它类	Lactones	内酯类化合物	C32H43O14-	3	0.9732	-	3479.13	3429.53	5021.43	1221.41	2362.15	1385.84	1.25444	0.026605	0.093304	0.416543	-1.26346	down
MW0120152	4-[5-(benzylsulfanyl)-4-methyl-4H-1,2,4-triazol-3-yl]aniline	4-[5-(苄基硫烷基)-4-甲基-4H-1,2,4-三唑-3-基]苯胺	Benzene and substituted derivatives	苯及其衍生物	Benzene and substituted derivatives	苯及其衍生物	C16H16N4S	3	0.9658	-	86915.4	54787.1	246651	35450.9	24527.8	50346.5	1.05674	0.257589	0.423153	0.284084	-1.81561	down
MW0146708	Bialaphos	双丙氨膦	Amino acids and derivatives	氨基酸及其衍生物	Amino acids and derivatives	氨基酸及其衍生物	C11H22N3O6P	3	0.9626	-	56534.4	55302.4	52175.8	24520.4	6905.27	22670.4	1.18525	0.0182471	0.0737828	0.329829	-1.60021	down
ZINC14655552	(4S)-4-(4,8-dimethoxy-9H-pyrido[3,4-b]indol-1-yl)-7,11-dimethoxy-2,3,4,12-tetrahydro-1H-indolo[2,3-a]quinolizin-5-ium	(4S)-4-(4,8-dimethoxy-9H-pyrido[3,4-b]indol-1-yl)-7,11-dimethoxy-2,3,4,12-tetrahydro-1H-indolo[2,3-a]quinolizin-5-ium	Alkaloids	生物碱	Alkaloids	生物碱	C30H29N4O4+	3	0.9586	-	2613.87	10377.1	6625.9	23884.4	28904.7	24821.5	1.24731	0.00322703	0.0272618	3.95632	1.98416	up
MW0161352	[3-hexadecanoyloxy-2-[(9Z,12Z,15Z)-octadeca-9,12,15-trienoyl]oxypropyl] 2-(trimethylazaniumyl)ethyl phosphate	[3-hexadecanoyloxy-2-[(9Z,12Z,15Z)-octadeca-9,12,15-trienoyl]oxypropyl] 2-(trimethylazaniumyl)ethyl phosphate	GP	甘油磷脂类	PC	磷脂酰胆碱	C42H78NO8P	3	0.9526	-	1.49051e+06	882597	635520	249581	131933	228347	1.31382	0.0850023	0.205078	0.202704	-2.30255	down
MW0161765	coproporphyrinogen III(4-)	coproporphyrinogen III(4-)	Others	其它类	Lactones	内酯类化合物	C36H40N4O8-4	3	0.9499	-	32714.2	36848.6	34437	16221.5	17973.4	16722.6	1.40614	0.00139675	0.0174647	0.489592	-1.03035	down
MW0011271	[(2R,3S,4S,5R,6S)-6-[(2S,3R,4S,5R,6R)-6-[[(1S,3R,4S,4aR,8aR)-4-[(3S)-3-[(2S,3R,4R,5R,6R)-3,4-dihydroxy-6-methyl-5-[(2S,3R,4R,5R,6S)-3,4,5-trihydroxy-6-methyloxan-2-yl]oxyoxan-2-yl]oxy-3-methylpent-4-enyl]-3,4,8,8a-tetramethyl-1,2,3,4a,5,6-hexahydronaphthalen-1-yl]oxy]-4,5-dihydroxy-2-methyloxan-3-yl]oxy-3,4,5-trihydroxyoxan-2-yl]methyl acetate	[(2R,3S,4S,5R,6S)-6-[(2S,3R,4S,5R,6R)-6-[[(1S,3R,4S,4aR,8aR)-4-[(3S) -3-[(2S,3R,4R,5R,6R)-3,4-二羟基-6-甲基-5-[(2S,3R,4R,5R,6S)-3,4,5-三羟基-6 -methyloxan-2-yl]oxyoxan-2-yl]oxy-3-methylpent-4-enyl]-3,4,8,8a-tetramethyl-1,2,3,4a,5,6-hexahydronaphthalen-1- yl]oxy]-4,5-dihydroxy-2-methyloxan-3-yl]oxy-3,4,5-trihydroxyoxan-2-yl]methyl acetate	Benzene and substituted derivatives	苯及其衍生物	Benzene and substituted derivatives	苯及其衍生物	C46H76O20	3	0.9499	-	22748.2	21553.9	21341.5	53243	48786.2	55676.6	1.41077	0.0030728	0.0266391	2.40245	1.26451	up
MW0013337	26-Desglucoavenacoside A	26-去葡萄糖基燕麦皂苷 A	Terpenoids	萜类	Triterpene Saponin	三萜皂苷	C45H72O18	3	0.9441	-	18968.4	39281.2	30867.3	79274.8	83594.2	85722.2	1.31486	0.00730553	0.0419616	2.7895	1.48001	up
MW0157969	trans,octacis-decaprenylphospho-beta-D-ribofuranose 5-phosphate	反式，八-十戊烯基磷酸-β-D-呋喃核糖5-磷酸	Terpenoids	萜类	Terpene	萜类	C55H92O11P2	3	0.9405	-	366.4	187.61	50.39	1135.04	504.32	2899.93	1.13441	0.207219	0.367826	7.51041	2.90889	up
MW0154208	N-Acetyl-D-fucosamine	N-乙酰-D-岩藻糖胺；2-乙酰氨基-2，6-二脱氧-D-半乳糖	Alcohol and amines	醇、胺类	Amines	胺类	C8H15NO5	3	0.94	-	71589.3	85699.3	70177.3	8224	22583.5	30200.6	1.24124	0.00302729	0.0264978	0.268208	-1.89858	down
ZINC85970028	Thelephantin I	[2，5-双（4-羟基苯基)-4-甲氧基-3，6-二氧代环己-1，4-二烯-1-基]苯甲酸酯	Benzene and substituted derivatives	苯及其衍生物	Benzene and substituted derivatives	苯及其衍生物	C26H18O7	3	0.9339	-	7861.03	153	1600.63	39353.2	43280	33488.6	1.17905	0.000772008	0.0129656	12.0776	3.59426	up
MW0163343	(R)-3-sulfolactate	(R)-3-磺基乳酸	Others	其它类	Lactones	内酯类化合物	C3H4O6S-2	3	0.9335	-	1289.36	3311.76	861.56	47185.1	21552.2	48977.4	1.35681	0.0507872	0.143477	21.5489	4.42954	up
MW0116771	Mcoppb	麦考普	Benzene and substituted derivatives	苯及其衍生物	Benzene and substituted derivatives	苯及其衍生物	C26H40N4	3	0.9266	-	1704.86	1503.61	896.09	4170.33	5715.93	3013.58	1.28337	0.0538161	0.149216	3.14281	1.65205	up
MW0143530	5-[[(4,7-Dihydroxy-2-oxo-2H-1-benzopyran-3-yl)amino]carbonyl]-4-methyl-1H-pyrrole-3-carboxylate	5-[[（4，7-二羟基-2-氧代-2H-1-苯并吡喃-3-基）氨基]羰基]-4-甲基-1H-吡咯-3-羧酸酯	Organic acids	有机酸	Organic acids	有机酸	C16H12N2O7	3	0.9171	-	5158.75	3759.01	3724.46	14577.7	7571.28	7500.25	1.21482	0.13205	0.273184	2.34525	1.22974	up
MW0143128	(2E,4Z)-3-Sulfo-2,4-hexadienedioic acid	3-磺基葡萄糖酸盐	Organic acids	有机酸	Organic acids	有机酸	C6H6O7S	3	0.9106	-	1564.28	2078.2	2078.42	20643.5	19900.3	19947.1	1.41313	1.33137e-06	0.00121786	10.5737	3.4024	up
MW0161583	[2-[(9Z,12Z)-octadeca-9,12-dienoyl]oxy-3-[(Z)-octadec-9-enoyl]oxypropyl] 2-(trimethylazaniumyl)ethyl phosphate	[2-[(9Z,12Z)-octadeca-9,12-dienoyl]oxy-3-[(Z)-octadec-9-enoyl]oxypropyl] 2-(trimethylazaniumyl)ethyl phosphate	GP	甘油磷脂类	PC	磷脂酰胆碱	C44H82NO8P	3	0.9078	-	1.3854e+06	506057	584527	255984	237125	240694	1.23278	0.174631	0.330189	0.296368	-1.75454	down
MW0165551	3-benzyl-3,6-bis(glutathione)-6-(hydroxymethyl)-DKP	3-苄基-3,6-双（谷胱甘肽）-6-（羟甲基）-DKP	Benzene and substituted derivatives	苯及其衍生物	Benzene and substituted derivatives	苯及其衍生物	C32H42N8O15S2-2	3	0.8919	-	64922.4	63488	66555.3	7882.86	36278.3	37232.6	1.02872	0.0578719	0.156524	0.417477	-1.26023	down
MW0141711	1D-3-amino-1-guanidino-1,3-dideoxy-scyllo-inositol	氨基链胺	Alcohol and amines	醇、胺类	Amines	胺类	C7H16N4O4	3	0.8819	-	10553.9	9714.63	10552.5	28081.5	26923	28506.7	1.41475	3.62883e-05	0.00318846	2.70955	1.43805	up
MW0152123	2(3H)-Furanone, dihydro-4-((4-hydroxy-3-(2-hydroxy-2-(4-hydroxy-3-methoxyphenyl)-1-(hydroxymethyl)ethyl)-5-methoxyphenyl)methyl)-3-((4-hydroxy-3-methoxyphenyl)methyl)-, (3R,4R)-	牛蒡酚 C	Lignans and Coumarins	木脂素和香豆素	Lignans	木脂素	C30H34O10	3	0.8747	-	346.06	353.54	339.76	933.82	906.32	1006	1.41469	0.00208833	0.0216145	2.73836	1.45331	up
MW0165357	LL-S490beta	LL-S490beta	Others	其它类	Ketone compounds	酮类化合物	C25H25N3O3	3	0.8741	-	17573.5	16744	30720.1	9739.41	9834.46	9684.71	1.26166	0.118899	0.254092	0.449871	-1.15242	down
MW0140000	NCGC00384750-01_C20H28O14_alpha-D-Glucopyranoside, beta-L-fructofuranosyl, 6-(4-hydroxy-3-methoxybenzoate)	NCGC00384750-01_C20H28O14_alpha-D-吡喃葡萄糖苷，β-L-呋喃果糖基，6-（4-羟基-3-甲氧基苯甲酸酯）	Benzene and substituted derivatives	苯及其衍生物	Benzene and substituted derivatives	苯及其衍生物	C20H28O14	3	0.8722	-	17894.8	11693.1	16418.2	38239.9	23417.9	38612.2	1.24417	0.0546749	0.150927	2.1795	1.124	up
MW0166426	6-deoxy-D-gluconate 6-sulfonate	6-脱氧-D-葡萄糖酸盐 6-磺酸盐	Organic acids	有机酸	Organic acids	有机酸	C6H10O9S-2	3	0.8682	-	14076.3	1037.73	19961.1	76604.3	72025	74436.3	1.12208	0.00566193	0.0367038	6.35966	2.66895	up
MW0165817	4-hydroxy-3-(1H-indol-3-yl)-5-(3-methylbut-2-enyl)-6-[2-(2-methylbut-3-en-2-yl)-1H-indol-3-yl]cyclohexa-3,5-diene-1,2-dione	4-羟基-3-(1H-indol-3-yl)-5-(3-methylbut-2-enyl)-6-[2-(2-methylbut-3-en-2-yl)-1H-indol -3-基]cyclohexa-3,5-diene-1,2-dione	Others	其它类	Ketone compounds	酮类化合物	C32H30N2O3	3	0.855	-	14460	19507.9	17795.1	9643.32	6571.37	5933.92	1.31696	0.00735981	0.0421616	0.427884	-1.22471	down
MW0146042	Asp-Asn-Met	L-天冬氨酰-L-天冬酰胺酰-L-蛋氨酸	Amino acids and derivatives	氨基酸及其衍生物	Amino acids and derivatives	氨基酸及其衍生物	C13H22N4O7S1	3	0.8471	-	647.35	1215.13	705.23	3368.86	1005.84	2370.39	1.04325	0.172504	0.327864	2.62689	1.39336	up
MW0132798	[(2R,3S,4S,5R,6S)-3,4-dihydroxy-6-[3,7,8-trihydroxy-2-(4-hydroxy-3-methoxyphenyl)-4-oxochromen-5-yl]oxy-5-[(2S,3R,4R,5R,6S)-3,4,5-trihydroxy-6-methyloxan-2-yl]oxyoxan-2-yl]methyl acetate	[(2R,3S,4S,5R,6S)-3,4-dihydroxy-6-[3,7,8-trihydroxy-2-(4-hydroxy-3-methoxyphenyl)-4-oxochromen-5-yl] oxy-5-[(2S,3R,4R,5R,6S)-3,4,5-trihydroxy-6-methyloxan-2-yl]oxyoxan-2-yl]乙酸甲酯	Benzene and substituted derivatives	苯及其衍生物	Benzene and substituted derivatives	苯及其衍生物	C30H34O18	3	0.8338	-	14624	16319.1	14902.4	7731.65	7556.17	7532.49	1.41075	0.00419465	0.030706	0.497766	-1.00646	down
MW0141373	13-(beta-D-glucosyloxy)docosanoic acid	13-β-D-葡萄糖基氧基二十二烷酸酯	Lipids	脂质	Free fatty acids	游离脂肪酸	C28H54O8	3	0.8048	-	373006	237583	263597	170603	127121	91958	1.24323	0.0399509	0.122298	0.445766	-1.16564	down
MW0138922	Melitidin	蜂毒苷	Flavonoids	黄酮	Flavones	黄酮	C33H40O17	3	0.7955	-	43039.6	9686.09	72507.9	800.43	12114.7	1068.11	1.11172	0.173269	0.328645	0.111657	-3.16285	down
MW0015965	2-[(2E,6E,10Z)-14,15-dihydroxy-11-(hydroxymethyl)-3,7,15-trimethylhexadeca-2,6,10-trienyl]-2,4,6,9-tetrahydroxy-5,7-dimethylphenalene-1,3-dione	2-[(2E,6E,10Z)-14,15-dihydroxy-11-(hydroxymethyl)-3,7,15-trimethylhexadeca-2,6,10-trienyl]-2,4,6,9-tetrahydroxy- 5,7-二甲基苯-1,3-二酮	Phenolic acids	酚酸类	Phenolic acids	酚酸类	C35H46O9	3	0.786	-	387.9	230.87	667.44	10015.5	8339.3	7824.45	1.38922	0.00495962	0.0337091	20.3538	4.34723	up
MW0151266	Hydroxyspheroidenone	羟基球烯酮	Others	其它类	Ketone compounds	酮类化合物	C41H60O3	3	0.7849	-	459888	162977	232849	677165	467378	1.06516e+06	1.11622	0.106098	0.235925	2.58229	1.36865	up
MW0161276	Estra-1,3,5(10)-triene-3,17-diol	Estra-1,3,5(10)-triene-3,17-diol	Alcohol and amines	醇、胺类	Alcohols	醇类	C18H24O2	3	0.7803	-	24946.9	27523.8	23183.8	8980.39	7557.74	8943.78	1.40438	0.00241294	0.0234865	0.336819	-1.56995	down
MW0154686	Carbamoyl adenylate	O-氨基甲酰基腺嘌呤	Nucleotides and derivatives	核苷酸及其衍生物	Nucleotides and derivatives	核苷酸及其衍生物	C11H15N6O8P	3	0.7717	-	7170.58	355.67	20.82	50122.8	51324.3	54398.1	1.17043	0.00027821	0.00773477	20.6498	4.36805	up
MW0104443	2-[5,7-dihydroxy-3-oxo-6-[(2E,6E)-3,7,11-trimethyldodeca-2,6,10-trienyl]-1H-isoindol-2-yl]pentanedioic acid	2-[5,7-dihydroxy-3-oxo-6-[(2E,6E)-3,7,11-trimethyldodeca-2,6,10-trienyl]-1H-isoindol-2-yl]戊二酸	Organic acids	有机酸	Organic acids	有机酸	C28H37NO7	3	0.7499	-	2680.55	7360.71	5633.12	3031.16	1028.49	725.72	1.10186	0.0993844	0.227416	0.305299	-1.71171	down
MW0166313	(5S,6E,8Z,11Z,14Z,16E,18R)-5,18-dihydroxyicosa-6,8,11,14,16-pentaenoate	(5S,6E,8Z,11Z,14Z,16E,18R)-5,18-dihydroxyicosa-6,8,11,14,16-pentaenoate	Lipids	脂质	Free fatty acids	游离脂肪酸	C20H29O4-	3	0.7488	-	36959.2	43417.7	40982.6	13106.8	3807.86	14027.7	1.23576	0.00322004	0.0272618	0.254964	-1.97164	down
MW0161684	Thymidine 5'-monophosphate	胸苷 5'-一磷酸	Others	其它类	Others	其它	C10H13N2O8P-2	3	0.747	-	367.6	1140.74	581.33	5865.16	9214.97	7940.17	1.36354	0.0150609	0.0653275	11.0162	3.46156	up
MW0144348	Ac-Val-Ala-Asp-CHO	Ac-Val-Ala-Asp-CHO	Amino acids and derivatives	氨基酸及其衍生物	Amino acids and derivatives	氨基酸及其衍生物	C14H23N3O6	3	0.7457	-	16868.7	21061.5	17740.4	2244.38	7198.27	8068.72	1.19357	0.00632296	0.0390426	0.314553	-1.66862	down
MEDP1343	LPC(0:0/18:3)	LPC(0:0/18:3)	Lipids	脂质	LPC	溶血磷脂酰胆碱	C26H49NO7P	3	0.7443	-	5350.02	4180.4	1504.22	14286.9	12257.6	14402.9	1.24541	0.00349537	0.0278893	3.7108	1.89173	up
MW0165810	1-naphthol 6'-O-malonylglucoside	1-萘酚 6'-O-丙二酰葡萄糖苷	Others	其它类	Lactones	内酯类化合物	C19H19O9-	3	0.7442	-	26418.8	26186.6	32302	11919.2	9657.03	10254	1.39319	0.00731335	0.0419694	0.374882	-1.41549	down
MW0008499	N-(6-Amino-1-Benzyl-2,4-Dioxo-1,2,3,4-Tetrahydropyrimidin-5-Yl)-N-Methylbenzamide	N-(6-Amino-1-Benzyl-2,4-Dioxo-1,2,3,4-Tetrahydropyrimidin-5-Yl)-N-Methylbenzamide	Benzene and substituted derivatives	苯及其衍生物	Benzene and substituted derivatives	苯及其衍生物	C19H18N4O3	3	0.7432	-	570.22	786.93	699.14	3047.95	2307.73	2836.1	1.39481	0.00753301	0.042737	3.98377	1.99413	up
ZINC14618554	Orixine	奥里克辛	Heterocyclic compounds	杂环化合物	Heterocyclic compounds	杂环化合物	C17H21NO6	3	0.743	-	7258.16	7750.78	5793.28	3347.04	2122.59	3778.83	1.28224	0.00801645	0.0439485	0.44459	-1.16945	down
MW0106868	Glutaminylprolyllysine	谷氨酰胺脯氨酰赖氨酸	Amino acids and derivatives	氨基酸及其衍生物	Amino acids and derivatives	氨基酸及其衍生物	C16H29N5O5	3	0.7419	-	221.31	367.67	250.93	697.85	906.34	514.83	1.27613	0.0488399	0.13977	2.52291	1.33509	up
MW0151157	His-Val-Trp	L-组氨酸-L-缬氨酸-L-色氨酸	Amino acids and derivatives	氨基酸及其衍生物	Amino acids and derivatives	氨基酸及其衍生物	C22H28N6O4	3	0.7386	-	1455.49	2993.74	3336.01	756.43	1063.61	969.48	1.23028	0.0989982	0.22681	0.358309	-1.48072	down
MW0142494	2'-N-Acetylparomamine	2-N-乙酰基苯基丙胺	Alcohol and amines	醇、胺类	Amines	胺类	C14H27N3O8	3	0.7386	-	1181.04	4559.58	1873.83	6933.45	8025.73	12159.8	1.20781	0.033862	0.109483	3.56151	1.83249	up
MW0145709	Asn-Cys-Ala	L-天冬酰胺-L-半胱氨酰-L-丙氨酸	Amino acids and derivatives	氨基酸及其衍生物	Amino acids and derivatives	氨基酸及其衍生物	C10H18N4O5S1	3	0.7371	-	1682.03	1165.05	1202.41	10796	12156	10057.9	1.40727	0.00239016	0.0233516	8.15161	3.02708	up
MW0164543	succinylo-toyocamycin phosphate	琥珀酰-丰卡霉素磷酸酯	Nucleotides and derivatives	核苷酸及其衍生物	Nucleotides and derivatives	核苷酸及其衍生物	C16H14N5O11P-4	3	0.7369	-	49.59	73.31	31.98	153.07	188.41	271.15	1.30891	0.0374275	0.116941	3.95551	1.98387	up
MW0165743	6'''-Hydroxyparomomycin	6'''-羟基巴龙霉素	Others	其它类	Others	其它	C23H48N4O15+4	3	0.7348	-	4193.16	5072.97	10682.9	3916.55	2925.24	1077.43	1.00432	0.177299	0.333083	0.396973	-1.33289	down
MW0141330	12-Deoxyaklanonic acid	12-脱氧羧酸	Benzene and substituted derivatives	苯及其衍生物	Benzene and substituted derivatives	苯及其衍生物	C21H18O7	3	0.7344	-	628.08	1036.62	506.62	2306.8	1936.23	1222.16	1.21171	0.0552354	0.151912	2.51699	1.3317	up
MW0164423	2-Methoxy-6-all-trans-heptaprenylhydroquinonel	2-Methoxy-6-all-trans-heptaprenylhydroquinonel	Benzene and substituted derivatives	苯及其衍生物	Benzene and substituted derivatives	苯及其衍生物	C42H64O3	3	0.7323	-	42350.5	101137	11738.6	785.53	1759.78	1596.33	1.31442	0.194835	0.352972	0.0266813	-5.22803	down
pmp001106	Vitexin-2''-O-glucoside	牡荆素-2''-O-葡萄糖苷	Flavonoids	黄酮	Flavones	黄酮	C27H30O16	3	0.7317	-	5770.28	4585.76	5467.17	31057.9	30294.5	26895	1.41137	0.00153197	0.0182191	5.57708	2.47951	up
MW0161685	Sarcosinium	肌氨酸	Others	其它类	Others	其它	C3H8NO2+	3	0.7258	-	11358.1	12556.5	18571.8	4239.76	5546.26	6326.52	1.31782	0.050332	0.142957	0.379239	-1.39882	down
MW0104353	2-(5,6-Dihydroxy-3-methoxycarbonylcyclohex-3-en-1-yl)oxypropanoic acid	2-(5,6-Dihydroxy-3-methoxycarbonylcyclohex-3-en-1-yl)oxypropanoic acid	Organic acids	有机酸	Organic acids	有机酸	C11H16O7	3	0.7258	-	61.82	128.06	251.09	6195.39	6405.58	7839.76	1.38833	0.00551596	0.0361176	46.354	5.53462	up
MW0163905	2-Imino-3-(indol-3-yl)propanoate	2-亚氨基-3-(吲哚-3-基)丙酸酯	Others	其它类	Lactones	内酯类化合物	C11H9N2O2-	3	0.7255	-	5598.62	6142.89	5236.55	11252.7	11864.7	12177.7	1.4039	8.68268e-05	0.00430953	2.07886	1.05579	up
MW0146407	Atractyloside B	苍术苷B	Terpenoids	萜类	Sesquiterpenoids	倍半萜	C21H38O10	3	0.7231	-	25813.5	25176.8	28988.8	14534.1	11014.8	12986.7	1.37599	0.000982439	0.014387	0.481822	-1.05343	down
MW0164830	(5S)-1-(3,4-dihydroxyphenyl)-5-hydroxydecan-3-one	(5S)-1-(3,4-二羟基苯基)-5-羟基癸-3-酮	Benzene and substituted derivatives	苯及其衍生物	Benzene and substituted derivatives	苯及其衍生物	C16H24O4	3	0.7221	-	2730.63	2853.72	4651.21	12603.4	12226.6	11871.3	1.37113	0.00230908	0.0228154	3.58566	1.84224	up
MW0164932	Festuclavine(1+)	黄芪(1+)	Heterocyclic compounds	杂环化合物	Heterocyclic compounds	杂环化合物	C16H21N2+	3	0.7182	-	6701.36	9668.74	7598.41	375.72	524.8	4324.4	1.1461	0.0206718	0.0798623	0.217991	-2.19766	down
MW0160965	Indole-3-acetyl-leu	Indole-3-乙酰基亮氨酸	Amino acids and derivatives	氨基酸及其衍生物	Amino acids and derivatives	氨基酸及其衍生物	C16H19N2O3-	3	0.7158	-	2523.71	3257.66	4196.83	6425.5	10241.1	6438.57	1.26256	0.060262	0.161178	2.31556	1.21136	up
MW0054838	Methyl 3,15,21-tris[[3,4,5-trihydroxy-6-(hydroxymethyl)oxan-2-yl]oxy]docosanoate	3,15,21-tris[[3,4,5-trihydroxy-6-(hydroxymethyl)oxan-2-yl]oxy] docosanoate 甲酯	FA	脂肪酰类	Others	其它	C41H76O20	3	0.7149	-	156.01	556.31	412.57	822.4	765.71	1287.43	1.1057	0.0509406	0.143591	2.55629	1.35405	up
MW0144549	Ala-Gln-Tyr	L-丙氨酰-L-谷氨酰胺-L-酪氨酸	Amino acids and derivatives	氨基酸及其衍生物	Amino acids and derivatives	氨基酸及其衍生物	C17H24N4O6	3	0.7148	-	846.76	1246.71	326.5	2556.77	2853.05	1934.37	1.17827	0.0124378	0.0575506	3.03483	1.60161	up
MW0148723	dTDP-D-ravidosamine	dTDP-D-拉维多胺	Nucleotides and derivatives	核苷酸及其衍生物	Nucleotides and derivatives	核苷酸及其衍生物	C18H31N3O14P2	3	0.7135	-	185.48	142.31	172.68	1539.62	637.54	1970.24	1.33852	0.0902508	0.213359	8.28701	3.05085	up
ZINC86050507	(3S)-3,8,9-trihydroxy-6-methoxy-3-methyl-10-[(2S)-2,5,10-trihydroxy-7-methoxy-2-methyl-4-oxo-1,3-dihydroanthracen-9-yl]-2,4-dihydroanthracen-1-one	（3S)-3，8，9-三羟基-6-甲氧基-3-甲基-10-[（2S)-2，5，10-三羟基-7-甲氧基-2-甲基-4-氧代-1，3-二氢蒽-9-基]-2，4-二氢蒽-1-酮	Lignans and Coumarins	木脂素和香豆素	Lignans	木脂素	C32H30O10	3	0.7124	-	4354.19	6699.93	3986.64	746.95	3058.9	1767.89	1.11396	0.0462721	0.134661	0.370576	-1.43216	down
MW0141858	2-(2-Carboxy-4-methylthiazol-5-yl)ethyl phosphate	2-(2-Carboxy-4-methylthiazol-5-yl) 磷酸乙酯	Organic acids	有机酸	Organic acids	有机酸	C7H10NO6PS	3	0.7113	-	17559.4	16105.2	15420.5	8597.89	7200.73	8391.98	1.39289	0.000757484	0.0128843	0.492829	-1.02084	down
MW0001721	2-[[1-(4-Nitrobenzoyl)pyrrolidine-2-carbonyl]amino]benzoic acid	2-[[1-(4-硝基苯甲酰基)吡咯烷-2-羰基]氨基]苯甲酸	Benzene and substituted derivatives	苯及其衍生物	Benzene and substituted derivatives	苯及其衍生物	C19H17N3O6	3	0.7061	-	16875.9	17096	17153.4	1039.04	1109.83	2341.62	1.38815	0.000483161	0.010542	0.0878331	-3.50909	down
ZINC103559750	Junceellolide I	[（1S，2S，3S，4R，7S，8Z，12S，13R，14S，17S)-2-乙酰氧基-3，14，17-三羟基-4，9，13，17-四甲基-5-氧代-6-氧杂三环[11.4.0.03，7]十七烷-8-烯-12-基]乙酸酯	Others	其它类	Lactones	内酯类化合物	C24H36O9	3	0.7026	-	3430.31	1964.33	2554.97	6885.43	4086.39	10269.2	1.18143	0.124624	0.26266	2.67196	1.4179	up
MW0163684	8-(Methylthio)-2-oxooctanoate	8-(甲硫基)-2-氧代辛酸酯	Others	其它类	Lactones	内酯类化合物	C9H15O3S-	3	0.7019	-	2280.13	4308.64	4744.75	11650.5	6151.78	8573.32	1.16874	0.0690326	0.178753	2.32722	1.21861	up
MW0129707	[(2R,3S,4S,5R,6R)-6-[1,7-bis(4-hydroxyphenyl)-5-oxoheptan-3-yl]oxy-3,4,5-trihydroxyoxan-2-yl]methyl (E)-3-(3,4-dimethoxyphenyl)prop-2-enoate	[(2R,3S,4S,5R,6R)-6-[1,7-bis(4-hydroxyphenyl)-5-oxoheptan-3-yl]oxy-3,4,5-trihydroxyoxan-2-yl]methyl (E)-3-(3,4-二甲氧基苯基)prop-2-enoate	Benzene and substituted derivatives	苯及其衍生物	Benzene and substituted derivatives	苯及其衍生物	C36H42O12	3	0.701	-	4272.84	9006.99	1244.43	15000.2	25046.8	11456.6	1.0924	0.073871	0.186239	3.54604	1.82621	up
MW0166718	4-Decanoylsucrose	4-癸酰蔗糖	Others	其它类	Lactones	内酯类化合物	C22H40O12	3	0.701	-	5682.67	10404.8	4694.97	2227.87	2104.58	2473.56	1.28702	0.117652	0.252384	0.327488	-1.61048	down
MW0155321	Phe-Pro-Tyr	苯丙氨酰-脯氨酰-酪氨酸	Amino acids and derivatives	氨基酸及其衍生物	Amino acids and derivatives	氨基酸及其衍生物	C23H27N3O5	3	0.6983	-	2442.15	2021.59	4498.22	6289.82	6962.32	5345.73	1.19103	0.0316719	0.104853	2.0752	1.05325	up
MW0169519	N-Acetyl-S-farnesyl-L-cysteine	N-乙酰基-S-法呢基-L-半胱氨酸	Amino acids and derivatives	氨基酸及其衍生物	Amino acids and derivatives	氨基酸及其衍生物	C20H33NO3S	3	0.6978	-	86951.5	90248.9	84806.4	184381	206718	194832	1.41168	0.00227293	0.0225972	2.23632	1.16113	up
MW0148076	Cys-Trp-Leu	半胱氨酸-色氨酸-亮氨酸	Amino acids and derivatives	氨基酸及其衍生物	Amino acids and derivatives	氨基酸及其衍生物	C20H28N4O4S1	3	0.6973	-	947031	1.24291e+06	1.19111e+06	184323	688097	117464	1.15613	0.0296512	0.100393	0.292774	-1.77214	down
MW0109833	2-Amino-5-carbamimidoylsulfanylpentanoic acid	2-Amino-5-carbamidoylsulfanylpentanoic 酸	Amino acids and derivatives	氨基酸及其衍生物	Amino acids and derivatives	氨基酸及其衍生物	C6H13N3O2S	3	0.6965	-	16354.1	9616.91	13178.9	4915.48	1465.52	5437.3	1.17381	0.0230095	0.0853069	0.301873	-1.72799	down
MW0156622	Ser-Ala-Asp	L-丝氨酰-L-丙氨酰-L-天冬氨酸	Amino acids and derivatives	氨基酸及其衍生物	Amino acids and derivatives	氨基酸及其衍生物	C10H17N3O7	3	0.6961	-	20552.9	22880	24548.5	60694.1	64215.3	60188.1	1.40913	2.36076e-05	0.00255827	2.72277	1.44507	up
MW0159009	Val-Gly-His	缬氨酸-甘氨酸-组氨酸	Amino acids and derivatives	氨基酸及其衍生物	Amino acids and derivatives	氨基酸及其衍生物	C13H21N5O4	3	0.6958	-	13731	15760.3	10872.6	6553.13	436.36	2217.22	1.10426	0.0122704	0.0571527	0.228092	-2.13231	down
MW0145430	Arg-Lys-Ala	L-精氨酰-L-赖氨酰-L-丙氨酸	Amino acids and derivatives	氨基酸及其衍生物	Amino acids and derivatives	氨基酸及其衍生物	C15H31N7O4	3	0.6912	-	2365.34	13497.3	8439.19	29278.9	20869.3	24286.5	1.11084	0.0166345	0.0692873	3.06292	1.61491	up
MW0157820	Thr-Thr-Ser	苏氨酸-苏氨酸-丝氨酸	Amino acids and derivatives	氨基酸及其衍生物	Amino acids and derivatives	氨基酸及其衍生物	C11H21N3O7	3	0.6909	-	9541.66	2775.17	8394.83	39968	42680.3	43698.9	1.31388	0.000603888	0.0118516	6.10029	2.60888	up
MW0166057	6-(Methylthio)hexyl-desulfoglucosinolate	6-(甲硫基)己基-脱硫代硫代葡萄糖苷	Others	其它类	Lactones	内酯类化合物	C14H27NO6S2	3	0.6901	-	4118.54	7672.01	5269.75	1467.27	1039.57	392.04	1.28632	0.0367833	0.115427	0.16992	-2.55708	down
MW0165770	dTDP-alpha-D-oliose	dTDP-α-D-油糖	Nucleotides and derivatives	核苷酸及其衍生物	Nucleotides and derivatives	核苷酸及其衍生物	C16H24N2O14P2-2	3	0.6896	-	7928.16	4401.24	2222.14	14224.3	13305.9	8118.92	1.09732	0.0505531	0.143211	2.44985	1.29269	up
MW0123471	9H-Pyrrolo[1',2':2,3]isoindolo[4,5,6-cd]indol-9-one, 10-acetyl-2,6,6a,7,11a,11b-hexahydro-11-hydroxy-7,7-dimethyl-, (6aR,11aS,11bR)-	α-环苯磺酸	Organic acids	有机酸	Organic acids	有机酸	C20H20N2O3	3	0.6895	-	4032.44	5348.67	2159.45	1330.18	975.93	1610.13	1.2211	0.105759	0.235576	0.339346	-1.55917	down
MW0108081	Lysyltryptophyllysine	赖氨酰色氨酸赖氨酸	Amino acids and derivatives	氨基酸及其衍生物	Amino acids and derivatives	氨基酸及其衍生物	C23H36N6O4	3	0.6891	-	8067.56	7682.77	9341.6	1134.42	2831.97	672.44	1.29004	0.00156221	0.0184201	0.184873	-2.43539	down
MW0126898	Tubastatin A	Tubastatin A	Heterocyclic compounds	杂环化合物	Heterocyclic compounds	杂环化合物	C20H21N3O2	3	0.6885	-	7638.5	11087.8	11425.5	40518.1	42364.1	23087	1.32588	0.0495537	0.141067	3.51453	1.81333	up
MW0156841	Ser-Lys-Gly	丝氨酸-赖氨酸-甘氨酸	Amino acids and derivatives	氨基酸及其衍生物	Amino acids and derivatives	氨基酸及其衍生物	C11H22N4O5	3	0.6876	-	141814	151720	159263	33048.2	47174.6	87452.8	1.25151	0.0205255	0.0794368	0.370311	-1.43319	down
MW0148554	Dimethylenetriurea	二亚甲基三脲	Others	其它类	Lactones	内酯类化合物	C5H12N6O3	3	0.6864	-	59435.5	80374.5	63566.3	169531	173935	84285.1	1.14764	0.118381	0.253444	2.10325	1.07262	up
MW0155946	Pro-Met-Met	脯氨酰-甲硫氨酰-甲硫氨酸	Amino acids and derivatives	氨基酸及其衍生物	Amino acids and derivatives	氨基酸及其衍生物	C15H27N3O4S2	3	0.6861	-	6556.51	5573.12	3660.82	9374.97	13196.5	15217.3	1.26258	0.0326194	0.106955	2.39314	1.2589	up
MW0155942	Pro-Met-Gly	脯氨酰-甲硫氨酰-甘氨酸	Amino acids and derivatives	氨基酸及其衍生物	Amino acids and derivatives	氨基酸及其衍生物	C12H21N3O4S1	3	0.6851	-	5314.82	2206.55	7597.92	2229.08	1423.22	886.72	1.11385	0.145738	0.292917	0.300214	-1.73594	down
MW0158240	Trp-Ser-His	色氨酸-丝氨酸-组氨酸	Amino acids and derivatives	氨基酸及其衍生物	Amino acids and derivatives	氨基酸及其衍生物	C20H24N6O5	3	0.685	-	38105	33750.5	40718	109119	103628	133659	1.39765	0.0108716	0.0527124	3.07715	1.6216	up
ZINC95909995	(2R,5S,7R,10S,11R,15R,17S)-7,15-dihydroxy-2,10,11,20,21-pentamethoxy-5,17-diphenyl-4,12,18-trioxapentacyclo[11.8.0.02,11.03,8.014,19]henicosa-1(21),3(8),13,19-tetraen-9-one	（2R，5S，7R，10S，11R，15R，17S)-7，15-二羟基-2，10，11，20，21-五甲氧基-5，17-二苯基-4，12，18-三氧杂戊环[11.8.0.02，11.03，8.01 4，19]二十一碳-1（21）3（8）13，19-四烯-9-酮	Others	其它类	Ketone compounds	酮类化合物	C35H36O11	3	0.685	-	7477.63	11147.4	7454.42	18453.8	17005.2	17595.3	1.3285	0.0113052	0.0539562	2.03433	1.02456	up
MW0150940	His-Gly-Leu	组氨酸-甘氨酸-亮氨酸	Amino acids and derivatives	氨基酸及其衍生物	Amino acids and derivatives	氨基酸及其衍生物	C14H23N5O4	3	0.6831	-	1830.51	3980.96	2117.81	318.15	1579.17	694.64	1.09386	0.100714	0.228726	0.326885	-1.61315	down
MW0149673	Gln-Gln-Trp	谷酰氨-谷酰氨-色氨酸	Amino acids and derivatives	氨基酸及其衍生物	Amino acids and derivatives	氨基酸及其衍生物	C21H28N6O6	3	0.6823	-	6866.93	9031.61	4598.79	3507.94	1235.14	3280.38	1.11789	0.0623956	0.165658	0.391439	-1.35314	down
ZINC14444100	1-(4-Hydroxybenzyl)-4,7-dimethoxy-9,10-dihydrophenanthrene-2-ol	1-(4-羟基苄基)-4，7-二甲氧基-9，10-二氢菲-2-醇	Benzene and substituted derivatives	苯及其衍生物	Benzene and substituted derivatives	苯及其衍生物	C23H22O4	3	0.6809	-	12015.1	11424.5	13656.6	6170.09	5654.79	5247.81	1.3948	0.00446471	0.0316671	0.460226	-1.11959	down
MW0158622	Tyr-Thr-Glu	酪氨酸-苏氨酸-谷氨酸	Amino acids and derivatives	氨基酸及其衍生物	Amino acids and derivatives	氨基酸及其衍生物	C18H25N3O8	3	0.6808	-	160796	197233	208539	393576	407853	382286	1.3849	0.00107613	0.015145	2.08927	1.063	up
MW0109125	Phe-Phe-Asp	L-苯丙氨酰-L-苯丙氨酰-L-天冬氨酸	Amino acids and derivatives	氨基酸及其衍生物	Amino acids and derivatives	氨基酸及其衍生物	C22H25N3O6	3	0.6766	-	463339	324927	407920	884290	933817	1.09264e+06	1.36822	0.00292724	0.0260866	2.43336	1.28295	up
MW0153724	Met-Val-Val	甲硫氨酰-缬氨酰-缬氨酸	Amino acids and derivatives	氨基酸及其衍生物	Amino acids and derivatives	氨基酸及其衍生物	C15H29N3O4S1	3	0.6764	-	22325.1	33326.5	24837.7	68545.6	71600	64724.1	1.37213	0.00118518	0.0158888	2.5453	1.34784	up
MW0150130	Glu-Pro-Thr	谷氨酸-脯氨酸-苏氨酸	Amino acids and derivatives	氨基酸及其衍生物	Amino acids and derivatives	氨基酸及其衍生物	C14H23N3O7	3	0.6759	-	43484.9	22331.5	39998.7	11629	6565.75	15183.7	1.24055	0.0519475	0.145685	0.315441	-1.66456	down
MW0156481	S-4-benzyl-3-isobutyryl-5,5-dimethyloxazolidin-2-one	S-4-苄基-3-异丁酰基-5,5-二甲基恶唑烷-2-	Benzene and substituted derivatives	苯及其衍生物	Benzene and substituted derivatives	苯及其衍生物	C16H21NO3	3	0.6755	-	5531.98	5462.49	6273.55	19216.2	17838.7	16664	1.40978	0.00153228	0.0182191	3.11089	1.63733	up
MW0105520	Alanylisoleucyllysine	丙氨酰异亮氨酰赖氨酸	Amino acids and derivatives	氨基酸及其衍生物	Amino acids and derivatives	氨基酸及其衍生物	C15H30N4O4	3	0.6753	-	4332.43	3485.86	2907.74	1134.18	2944.83	926.11	1.0808	0.0774216	0.192429	0.466633	-1.09964	down
MW0105750	Arginylthreonyllysine	Arg Thr Lys	Amino acids and derivatives	氨基酸及其衍生物	Amino acids and derivatives	氨基酸及其衍生物	C16H33N7O5	3	0.6747	-	647.78	1360.03	899.42	315.49	150.89	309.54	1.27459	0.068227	0.176808	0.266893	-1.90567	down
MW0152430	Leu-Met-Cys	L-亮氨酸-L-蛋氨酸-L-半胱氨酸	Amino acids and derivatives	氨基酸及其衍生物	Amino acids and derivatives	氨基酸及其衍生物	C14H27N3O4S2	3	0.6738	-	22732	23346.3	25813	118286	115144	128228	1.41495	0.000998946	0.0145285	5.03061	2.33073	up
MW0158425	Tyr-Cys-Ser	酪氨酸-半胱氨酸-丝氨酸	Amino acids and derivatives	氨基酸及其衍生物	Amino acids and derivatives	氨基酸及其衍生物	C15H21N3O6S1	3	0.6738	-	5437.21	6077.81	7897.3	45212.1	51810.2	50296.3	1.40826	0.000735422	0.0127173	7.58892	2.92389	up
MW0162922	(2R,3S,5R,6S)-4-{[amino(iminio)methyl]amino}-2,3,5,6-tetrahydroxycyclohexyl phosphate	(2R,3S,5R,6S)-4-{[amino(iminio)methyl]amino}-2,3,5,6-tetrahydroxycyclohexyl phosphate	Others	其它类	Others	其它	C7H15N3O8P-	3	0.6738	-	64903.8	40531	70888.1	16582.3	18722.3	8932.37	1.31174	0.0320192	0.105733	0.250886	-1.99489	down
MW0164800	2-[(Z)-2-carboxyethenyl]-4,5-dihydroxyphenolate	2-[(Z)-2-羧基乙烯基]-4,5-二羟基苯酚	Others	其它类	Others	其它	C9H7O5-	3	0.6724	-	1524.45	3621.94	3734.41	6152.12	6528.86	7775.17	1.1792	0.0150221	0.0652186	2.30341	1.20377	up
MEDP1677	Trp-Ala-Asp	色氨酸-丙氨酸-天冬氨酸	Amino acids and derivatives	氨基酸及其衍生物	Amino acids and derivatives	氨基酸及其衍生物	C18H22N4O6	3	0.6719	-	46414.5	48337.8	48467.7	90590.8	99327.9	99899.4	1.41095	0.00264354	0.024767	2.02359	1.01691	up
MW0158410	Tyr-Asp-Glu	酪氨酸-天冬氨酸-谷氨酸	Amino acids and derivatives	氨基酸及其衍生物	Amino acids and derivatives	氨基酸及其衍生物	C18H23N3O9	3	0.671	-	7104.65	1688.52	29106.6	60261.8	52108.8	44389.3	1.09166	0.0239423	0.0872871	4.13617	2.04829	up
MW0144820	Z-Ala-Asn-OH	Z-Ala-Asn-OH	Amino acids and derivatives	氨基酸及其衍生物	Amino acids and derivatives	氨基酸及其衍生物	C15H19N3O6	3	0.6705	-	29911.8	33243.6	33811	10297.1	4250.31	4460.24	1.34336	0.000952039	0.0142552	0.196023	-2.3509	down
MW0134498	5-[[4,5-Dihydroxy-6-[5-hydroxy-2-(4-hydroxyphenyl)-7-methoxy-4-oxochromen-3-yl]oxy-3-(3,4,5-trihydroxy-6-methyloxan-2-yl)oxyoxan-2-yl]methoxy]-3-hydroxy-3-methyl-5-oxopentanoic acid	5-[[4,5-Dihydroxy-6-[5-hydroxy-2-(4-hydroxyphenyl)-7-methoxy-4-oxochromen-3-yl]oxy-3-(3,4,5-trihydroxy- 6-methyloxan-2-yl)oxyoxan-2-yl]methoxy]-3-hydroxy-3-methyl-5-oxopentanoic acid	Benzene and substituted derivatives	苯及其衍生物	Benzene and substituted derivatives	苯及其衍生物	C34H40O19	3	0.6701	-	7584.65	2547.92	9497.22	52113.8	68625.2	55554.1	1.33557	0.00387904	0.0292909	8.98089	3.16686	up
MW0108172	Met-Pro-Arg	甲硫氨酰-脯氨酰-精氨酸	Amino acids and derivatives	氨基酸及其衍生物	Amino acids and derivatives	氨基酸及其衍生物	C16H30N6O4S1	3	0.6691	-	44586.7	19289.4	35543	15385.3	4859.04	14936.7	1.09463	0.0838184	0.203377	0.353865	-1.49873	down
MW0144513	Ala-Asp-His	L-丙氨酰-L-天冬氨酰-L-组氨酸	Amino acids and derivatives	氨基酸及其衍生物	Amino acids and derivatives	氨基酸及其衍生物	C13H19N5O6	3	0.6663	-	6903.7	6697.56	6006.85	2624.62	1829.28	1384.67	1.35592	0.00078122	0.0130243	0.297763	-1.74776	down
MW0111553	[4,5-Dihydroxy-6-(hydroxymethyl)-2-[2,4,6-trihydroxy-3-(4-hydroxybenzoyl)phenyl]oxan-3-yl] 3,4,5-trihydroxybenzoate	[4,5-二羟基-6-(羟甲基)-2-[2,4,6-三羟基-3-(4-羟基苯甲酰基)苯基]恶烷-3-基] 3,4,5-三羟基苯甲酸酯	Benzene and substituted derivatives	苯及其衍生物	Benzene and substituted derivatives	苯及其衍生物	C26H24O14	3	0.6654	-	207.43	139.81	98.28	1373.75	1161.53	690.08	1.35775	0.0414737	0.124786	7.23954	2.8559	up
MW0149067	Eudesobovatol B	欧德索博瓦托尔B	Alcohol and amines	醇、胺类	Alcohols	醇类	C33H44O4	3	0.6646	-	54036.5	93583.4	77694	167368	198218	240438	1.32374	0.0124448	0.0575506	2.68969	1.42744	up
ZINC85541166	Tribulusamide B	（2R，3S)-2-(4-羟基-3-甲氧基苯基)-5-[（E)-3-[2-(4-羟苯基）乙基氨基]-3-氧代丙-1-烯基]-N-[2-(4-羟苯基)-2-氧代乙基]-7-甲氧基-2，3-二氢-1-苯并呋喃-3-甲酰胺	Alcohol and amines	醇、胺类	Amines	胺类	C36H34N2O9	3	0.6633	-	377.58	2348.57	2706.49	9924.33	6156.71	11142.7	1.16048	0.0241977	0.0878466	5.01114	2.32514	up
MW0004545	4-[2-[(2-Ethyl-2,3-dihydroxybutanoyl)oxymethyl]anilino]-4-oxobutanoic acid	4-[2-[(2-乙基-2,3-二羟基丁酰基)氧基甲基]苯胺基]-4-氧代丁酸	Benzene and substituted derivatives	苯及其衍生物	Benzene and substituted derivatives	苯及其衍生物	C17H23NO7	3	0.662	-	28258.5	31173	29540.7	10702.8	4167.89	8527.79	1.31415	0.00276374	0.0253022	0.262986	-1.92694	down
MW0144786	Ala-Tyr-Val	L-丙氨酰-L-酪氨酰-L-缬氨酸	Amino acids and derivatives	氨基酸及其衍生物	Amino acids and derivatives	氨基酸及其衍生物	C17H25N3O5	3	0.6604	-	13655.7	18054.3	16750.7	3331.99	9048.94	8040.11	1.16689	0.0154869	0.0663627	0.421394	-1.24676	down
MW0158975	Val-Gln-Ser	缬氨酸-谷氨酰胺-丝氨酸	Amino acids and derivatives	氨基酸及其衍生物	Amino acids and derivatives	氨基酸及其衍生物	C13H24N4O6	3	0.66	-	506389	468195	498998	205379	226176	234294	1.40833	9.14151e-05	0.00443568	0.451857	-1.14606	down
MW0146156	Asp-Ile-Ser	L-天冬氨酰-L-异亮氨酰-L-丝氨酸	Amino acids and derivatives	氨基酸及其衍生物	Amino acids and derivatives	氨基酸及其衍生物	C13H23N3O7	3	0.6594	-	15439	15865.1	22152.8	39626.1	42061.6	33432.7	1.33907	0.00396439	0.0295941	2.15352	1.1067	up
MW0166375	Petiveriin	S-苄基-L-半胱氨酸亚砜	Others	其它类	Others	其它	C10H13NO3S	3	0.6586	-	83.15	48.73	13.75	735.44	1165.92	2041.24	1.33701	0.0806907	0.197794	27.0727	4.75877	up
MW0167903	oleanolate 3-beta-D-glucuronoside-(3,1)-galactoside	齐墩果酸甲酯 3-β-D-葡萄糖醛酸苷-(3,1)-半乳糖苷	Terpenoids	萜类	Triterpene	三萜	C42H64O14-2	3	0.6567	-	1066.1	805.56	749.58	11592.1	3969.25	7424.19	1.35236	0.0909179	0.214417	8.76895	3.1324	up
ZINC14610508	2-[3-(2,4-Dihydroxyphenyl)-2-hydroxy-5-methylphenyl]-5-(6-hydroxy-1-benzofuran-2-yl)benzene-1,3-diol	2-[3-(2，4-二羟基苯基)-2-羟基-5-甲基苯基]-5-(6-羟基-1-苯并呋喃-2-基）苯-1，3-二醇	Benzene and substituted derivatives	苯及其衍生物	Benzene and substituted derivatives	苯及其衍生物	C27H20O7	3	0.6559	-	1101.33	1399.99	1427.65	4654.53	3767.12	4321.3	1.39609	0.00317211	0.0271026	3.24333	1.69748	up
MW0156012	Pro-Trp-Ala	脯氨酰-色氨酸-丙氨酸	Amino acids and derivatives	氨基酸及其衍生物	Amino acids and derivatives	氨基酸及其衍生物	C19H24N4O4	3	0.6555	-	2727.66	2023.31	2518.55	851.12	403.41	1507.45	1.1539	0.0228487	0.0849898	0.37994	-1.39616	down
MW0162200	4-(Phosphooxymethyl)-2-furancarboxaldehyde(2-)	4-(磷氧甲基)-2-呋喃甲醛(2-)	Others	其它类	Lactones	内酯类化合物	C6H5O6P-2	3	0.6549	-	743.39	826.34	1469.6	14581	14613.3	15057	1.40079	4.1868e-06	0.00144509	14.5596	3.8639	up
MW0104217	13-Dodecan-2-yl-6-(1-hydroxyethyl)-3-(hydroxymethyl)-12-methyl-9-propan-2-yl-1-oxa-4,7,10-triazacyclotridecane-2,5,8,11-tetrone	13-Dodecan-2-yl-6-(1-hydroxyethyl)-3-(hydroxymethyl)-12-methyl-9-propan-2-yl-1-oxa-4,7,10-triazacyclotridecane-2,5, 8,11-四酮	Organic acids	有机酸	Organic acids	有机酸	C28H51N3O7	3	0.6544	-	9584.09	17634.9	27034.9	64156.9	57562.1	59379.2	1.28319	0.00718443	0.0415228	3.33798	1.73897	up
MW0150516	Gly-Tyr-His	甘氨酸-酪氨酸-组氨酸	Amino acids and derivatives	氨基酸及其衍生物	Amino acids and derivatives	氨基酸及其衍生物	C17H21N5O5	3	0.654	-	1906.06	4939.41	4585.14	10870	13509.8	12018.7	1.26546	0.0029126	0.0260866	3.18431	1.67098	up
ZINC13378518	Blestrianol A	Blestrianol A	Others	其它类	Others	其它	C30H26O6	3	0.6538	-	147064	119308	74862.9	50982.6	44178.1	55018.1	1.25094	0.0907611	0.214203	0.440104	-1.18409	down
MW0140067	(2S,3R)-4-methylidene-2-octyl-5-oxooxolane-3-carboxylic acid	(2S,3R)-4-亚甲基-2-辛基-5-氧代氧戊环-3-羧酸	Organic acids	有机酸	Organic acids	有机酸	C14H22O4	3	0.6535	-	1768.22	7884.01	7099.35	20012.1	21492.4	24590.2	1.20264	0.00325008	0.0273314	3.94558	1.98024	up
MW0151548	Ile-Phe-Thr	L-异亮氨酸-L-苯丙氨酸-L-苏氨酸	Amino acids and derivatives	氨基酸及其衍生物	Amino acids and derivatives	氨基酸及其衍生物	C19H29N3O5	3	0.6532	-	1270.14	3806.9	722.42	3588.61	4827.84	6557.7	1.05787	0.0761877	0.190089	2.58199	1.36848	up
MW0012447	4-Ethenyl-21-hydroxy-6,8,10,12-tetramethyl-15,23-dioxa-25-azaheptacyclo[19.2.2.216,19.13,7.01,22.08,13.014,28]octacosa-5,16(27),17,19(26)-tetraene-2,24-dione	4-Ethenyl-21-hydroxy-6,8,10,12-tetramethyl-15,23-dioxa-25-azaheptacyclo[19.2.2.216,19.13,7.01,22.08,13.014,28]octacosa-5,16(27) ,17,19(26)-四烯-2,24-二酮	Benzene and substituted derivatives	苯及其衍生物	Benzene and substituted derivatives	苯及其衍生物	C31H37NO5	3	0.6529	-	6667.11	4632.42	4481.86	591.6	1631.82	2046.49	1.23267	0.0150258	0.0652186	0.270566	-1.88595	down
MW0156697	Ser-Cys-Ser	丝氨酰-半胱氨酰-丝氨酸	Amino acids and derivatives	氨基酸及其衍生物	Amino acids and derivatives	氨基酸及其衍生物	C9H17N3O6S1	3	0.6483	-	100097	136589	740245	56542.7	58286.7	61056.2	1.02715	0.327112	0.497865	0.180039	-2.47362	down
ZINC14594112	methyl (12S)-21-hydroxy-12-(2-methylprop-1-enyl)-3,10-dioxo-13-oxapentacyclo[12.8.0.02,11.04,9.015,20]docosa-1(14),2(11),4,6,8,15,17,19,21-nonaene-22-carboxylate	（12S)-21-羟基-12-(2-甲基丙-1-烯基)-3，10-二氧代-13-氧杂五环[12.8.0.02，11.04，9.015，20]二十二碳-1（14）2（11）4，6，8，15，17，19，21-壬烯-22-羧酸甲酯	Others	其它类	Lactones	内酯类化合物	C27H20O6	3	0.6479	-	12467.7	26453.5	49425	67565.7	75847.3	63434	1.10386	0.0547786	0.151112	2.34132	1.22732	up
MW0110359	Val-Met-Lys	缬氨酸-甲硫氨酸-赖氨酸	Amino acids and derivatives	氨基酸及其衍生物	Amino acids and derivatives	氨基酸及其衍生物	C16H32N4O4S1	3	0.6468	-	44349.4	53781.2	27921.2	143217	106664	47124.1	1.0177	0.172027	0.327435	2.35621	1.23647	up
MW0148086	Cys-Tyr-Thr	半胱氨酸-酪氨酸-苏氨酸	Amino acids and derivatives	氨基酸及其衍生物	Amino acids and derivatives	氨基酸及其衍生物	C16H23N3O6S1	3	0.6465	-	23551.8	28294.6	17939.8	47140.3	40706.2	68634.6	1.26255	0.0625281	0.165874	2.24229	1.16497	up
MW0149974	Glu-Gln-Ile	古氨酸-谷酰胺-异亮氨酸	Amino acids and derivatives	氨基酸及其衍生物	Amino acids and derivatives	氨基酸及其衍生物	C16H28N4O7	3	0.6456	-	13103.2	11025.8	10398.1	28630	23435.7	27267.8	1.38451	0.0033029	0.0275846	2.29772	1.2002	up
MW0153629	Met-Phe-Glu	甲硫氨酰-苯丙氨酰-谷氨酸	Amino acids and derivatives	氨基酸及其衍生物	Amino acids and derivatives	氨基酸及其衍生物	C19H27N3O6S1	3	0.6402	-	258764	113094	98678.2	782705	938996	815571	1.34083	0.000607891	0.0118516	5.3923	2.4309	up
MW0147998	Cys-Gln-Gln	半胱氨酸-谷酰氨-谷酰氨	Amino acids and derivatives	氨基酸及其衍生物	Amino acids and derivatives	氨基酸及其衍生物	C13H23N5O6S1	3	0.6391	-	77576	88489.4	58716	176002	159842	164480	1.35611	0.00229187	0.0226815	2.22582	1.15434	up
MW0112225	2-Methylethcathinone	2-甲基乙基卡西酮	Others	其它类	Ketone compounds	酮类化合物	C12H17NO	3	0.6387	-	141.8	436.4	145.53	22.29	51.68	64.1	1.20854	0.181621	0.338211	0.190776	-2.39005	down
MW0156057	Pro-Val-Val	脯氨酰-缬氨酰-缬氨酸	Amino acids and derivatives	氨基酸及其衍生物	Amino acids and derivatives	氨基酸及其衍生物	C15H27N3O4	3	0.6319	-	11554.3	15406	19273.5	3865.67	7904.89	9691.61	1.12196	0.0461098	0.134442	0.46421	-1.10715	down
MW0153555	Met-Gly-His	甲硫氨酰-甘氨酰-组氨酸	Amino acids and derivatives	氨基酸及其衍生物	Amino acids and derivatives	氨基酸及其衍生物	C13H21N5O4S1	3	0.6316	-	185763	167212	179668	362126	386092	332584	1.40209	0.0034648	0.0278893	2.02913	1.02086	up
MW0150613	Gomisin H	戈米辛H	Heterocyclic compounds	杂环化合物	Heterocyclic compounds	杂环化合物	C23H30O7	3	0.6284	-	15482.4	19985.9	14893	4642.86	7869.39	8689.52	1.27665	0.0101913	0.050699	0.420993	-1.24813	down
MW0158475	Tyr-His-Ala	酪氨酸-组氨酸-丙氨酸	Amino acids and derivatives	氨基酸及其衍生物	Amino acids and derivatives	氨基酸及其衍生物	C18H23N5O5	3	0.6243	-	10095.1	9220.93	25059.7	4744.62	6350.35	4691.89	1.15339	0.203763	0.363775	0.355755	-1.49105	down
MW0141710	1D-3-amino-1-guanidino-1,3-dideoxy-scyllo-inositol 4-phosphate	1D-1-胍基-3-氨基-1,3-二脱氧-鲨肌醇4-磷酸酯	Organic acids	有机酸	Organic acids	有机酸	C7H17N4O7P	3	0.6238	-	16233.9	10650.7	8328.56	5839.91	2486.37	5926.29	1.14035	0.0781492	0.193498	0.404751	-1.30489	down
MW0150426	Gly-Lys-Ser	甘氨酸-赖氨酸-丝氨酸	Amino acids and derivatives	氨基酸及其衍生物	Amino acids and derivatives	氨基酸及其衍生物	C11H22N4O5	3	0.6199	-	13082.2	7408.17	4762.61	21278	17157.5	17271.3	1.16715	0.0340279	0.109692	2.20595	1.1414	up
MW0152924	Lys-Cys-Gly	L-赖氨酸-L-半胱氨酸-L-甘氨酸	Amino acids and derivatives	氨基酸及其衍生物	Amino acids and derivatives	氨基酸及其衍生物	C11H22N4O4S1	3	0.6197	-	3846.46	2527.87	2633.17	1363.16	1267.76	1589.17	1.31567	0.0573846	0.155789	0.468508	-1.09385	down
MW0110177	Tumonoic acid F	Tumonoic acid F	Organic acids	有机酸	Organic acids	有机酸	C21H37NO5	3	0.6183	-	477.85	331.7	331.86	827.3	1834.18	1062.72	1.28653	0.10187	0.229987	3.26281	1.70611	up
MW0164263	D-nopalinate(1-)	D-胭脂酸盐(1-)	Organic acids	有机酸	Organic acids	有机酸	C11H19N4O6-	3	0.6177	-	46936.2	37990	51002.3	86801.8	108299	90666.3	1.35917	0.00590525	0.0376033	2.10233	1.07199	up
MW0006184	2-(2,5-dimethoxy-4-methylsulfanylphenyl)-N-[(2-methoxyphenyl)methyl]ethanamine	2-(2,5-二甲氧基-4-甲基硫烷基苯基)-N-[(2-甲氧基苯基)甲基]乙胺	Benzene and substituted derivatives	苯及其衍生物	Benzene and substituted derivatives	苯及其衍生物	C19H25NO3S	3	0.6165	-	6768.43	7162.29	8116.57	25912.1	24669.8	20005.2	1.39883	0.00943183	0.0487099	3.20162	1.6788	up
MW0144557	Ala-Glu-Cys	L-丙氨酰-L-谷氨酰-L-半胱氨酸	Amino acids and derivatives	氨基酸及其衍生物	Amino acids and derivatives	氨基酸及其衍生物	C11H19N3O6S1	3	0.6159	-	3037.62	3583.69	3495.08	786.06	1088.73	1102.48	1.39076	0.000767635	0.0129305	0.294302	-1.76463	down
MW0120168	4-acetyloxy-6-hydroxy-2-(2-hydroxypropan-2-yl)-4a,6-dimethyl-3,4,5,7,8,8a-hexahydro-2H-chromene-5-carboxylic acid	4-乙酰氧基-6-羟基-2-(2-羟基丙-2-基)-4a,6-二甲基-3,4,5,7,8,8a-六氢-2H-色烯-5-羧酸	Organic acids	有机酸	Organic acids	有机酸	C17H28O7	3	0.6157	-	3551.68	6659.4	3550.81	21315.5	32206.4	40997.2	1.36074	0.038186	0.118267	6.86818	2.77993	up
MW0002514	2-(Dibenzylcarbamoyl)benzoic acid	2-(二苄基氨基甲酰基)苯甲酸	Benzene and substituted derivatives	苯及其衍生物	Benzene and substituted derivatives	苯及其衍生物	C22H19NO3	3	0.6155	-	11020.9	14773.3	4846.01	20407.5	23879.2	27045.2	1.14452	0.0227716	0.0848887	2.32805	1.21912	up
MW0163429	S-[(Z)-Phenylacetohydroxymoyl]-L-cysteine	S-(苯乙酰硫代羟氨酰基)-L-半胱氨酸	Others	其它类	Others	其它	C11H14N2O3S	3	0.6152	-	27237	29839.6	27590.2	14371.6	11982.9	13400	1.40036	0.000177423	0.00617814	0.469541	-1.09068	down
MW0144784	Ala-Tyr-Trp	L-丙氨酰-L-酪氨酰-L-色氨酸	Amino acids and derivatives	氨基酸及其衍生物	Amino acids and derivatives	氨基酸及其衍生物	C23H26N4O5	3	0.6123	-	4979.2	4265.5	3890.73	2331.7	2474.99	1409.87	1.26865	0.00756272	0.042759	0.473267	-1.07928	down
MW0140282	(2R)-2-[[(2S,3R)-3-amino-2-hydroxy-4-phenyl-butanoyl]amino]-4-methyl-pentanoic acid	(2R)-2-[[(2S,3R)-3-amino-2-hydroxy-4-phenyl-butanoyl]amino]-4-methyl-pentanoic acid	Organic acids	有机酸	Organic acids	有机酸	C16H24N2O4	3	0.6109	-	16244.6	16794.5	18144.6	2190.12	11351.1	8706.08	1.01254	0.0656995	0.171833	0.434655	-1.20206	down
MW0142637	3-(phosphoacetamido)-L-alanine	3-(磷酸乙酰氨基)-L-丙氨酸	Amino acids and derivatives	氨基酸及其衍生物	Amino acids and derivatives	氨基酸及其衍生物	C5H11N2O7P	3	0.6107	-	47.88	46.41	83.98	2231.91	2170.02	2429.33	1.40975	0.000977257	0.0143434	38.3197	5.26002	up
MW0163482	Baicalin(1-)	黄芩(1-)	Organic acids	有机酸	Organic acids	有机酸	C21H17O11-	3	0.6104	-	28416.8	28911.3	26379.7	9969.94	14437.4	14987.5	1.33969	0.00407435	0.0302069	0.470623	-1.08736	down
MW0153953	Semidehydroascorbic acid	单脱氢抗坏血酸	Organic acids	有机酸	Organic acids	有机酸	C6H7O6	3	0.6068	-	633652	1.06455e+06	1.5106e+06	466218	423707	477655	1.19307	0.135649	0.27867	0.426196	-1.23041	down
MW0133594	4-Benzyloxy-2',3,4',6'-tetramethoxychalcone	4-苄氧基-2',3,4',6'-四甲氧基查耳酮	Benzene and substituted derivatives	苯及其衍生物	Benzene and substituted derivatives	苯及其衍生物	C26H26O6	3	0.6064	-	1852.4	282.09	337.37	1720.13	2524.01	2296.13	1.05008	0.102033	0.229988	2.64589	1.40375	up
MW0107195	Glycylprolyllysine	Gly Pro Lys	Amino acids and derivatives	氨基酸及其衍生物	Amino acids and derivatives	氨基酸及其衍生物	C13H24N4O4	3	0.6043	-	10041.7	13705.8	11575.9	4731.05	4138.36	5995.14	1.34902	0.0107501	0.0523573	0.420813	-1.24875	down
MW0146077	Asp-Gln-Asp	L-天冬氨酰-L-谷氨酰胺-L-天冬氨酸	Amino acids and derivatives	氨基酸及其衍生物	Amino acids and derivatives	氨基酸及其衍生物	C13H20N4O9	3	0.6032	-	29208.9	25677.6	24075.1	3654.88	12500	17251.4	1.04723	0.0483258	0.138948	0.42307	-1.24103	down
MW0156687	Ser-Asp-Thr	L-丝氨酰-L-天冬氨酰-L-苏氨酸	Amino acids and derivatives	氨基酸及其衍生物	Amino acids and derivatives	氨基酸及其衍生物	C11H19N3O8	3	0.6019	-	1.90538e+06	2.1025e+06	2.03539e+06	6.08426e+06	5.96403e+06	6.27303e+06	1.41531	1.28584e-05	0.00203915	3.03169	1.60012	up
MW0105560	Alanylserylarginine	Ala Ser Arg	Amino acids and derivatives	氨基酸及其衍生物	Amino acids and derivatives	氨基酸及其衍生物	C12H24N6O5	3	0.6016	-	1828.39	2714.57	1408.93	735.86	554.12	316.91	1.28307	0.0530349	0.14768	0.26998	-1.88908	down
MW0162939	[3-[(9Z,12Z)-octadeca-9,12-dienoyl]oxy-2-[(9Z,12Z,15Z)-octadeca-9,12,15-trienoyl]oxypropyl] 2-(trimethylazaniumyl)ethyl phosphate	[3-[(9Z,12Z)-octadeca-9,12-dienoyl]oxy-2-[(9Z,12Z,15Z)-octadeca-9,12,15-trienoyl]oxypropyl] 2-(trimethylazaniumyl)ethyl phosphate	GP	甘油磷脂类	PC	磷脂酰胆碱	C44H78NO8P	3	0.6012	-	29520	13362.5	18425.5	64091.7	83661.4	55596.2	1.30785	0.0137381	0.0614761	3.31685	1.72981	up
MW0168177	Jadomycin B	佳多霉素B	Others	其它类	Ketone compounds	酮类化合物	C30H31NO9	3	0.6011	-	6737.83	6900.22	8781.84	1864.47	3103.34	4652.35	1.20904	0.0160754	0.0680481	0.42909	-1.22065	down
MW0115845	NCGC00380384-01_C21H26O7_(2E,4E)-6-{[(5R,9aS,9bS)-9b-Hydroxy-6,6,9a-trimethyl-1-oxo-1,3,5,5a,6,7,8,9,9a,9b-decahydronaphtho[1,2-c]furan-5-yl]oxy}-6-oxo-2,4-hexadienoic acid	NCGC00380384-01_C21H26O7_(2E,4E)-6-{[(5R,9aS,9bS)-9b-Hydroxy-6,6,9a-trimethyl-1-oxo-1,3,5,5a,6,7,8,9,9a,9b-decahydronaphtho[1,2-c]furan-5-yl]oxy}-6-oxo-2,4-hexadienoic acid	Organic acids	有机酸	Organic acids	有机酸	C21H26O7	3	0.6	-	1229.4	3512.21	2529.4	55408.7	55563.8	55532.1	1.39209	0.000144441	0.00562367	22.8998	4.51726	up
MW0150273	Glutathionylaminopropylcadaverine	谷胱甘肽氨丙基尸胺	Alcohol and amines	醇、胺类	Polyamines	多胺	C18H36N6O5S	3	0.5995	-	28538.2	20849.3	24883.9	7272.21	15338.4	8706.03	1.25019	0.0130217	0.0592076	0.421651	-1.24588	down
MW0106910	Glu-Ile-Val	谷氨酸-异亮氨酸-缬氨酸	Amino acids and derivatives	氨基酸及其衍生物	Amino acids and derivatives	氨基酸及其衍生物	C16H29N3O6	3	0.5977	-	25432.5	25761	26404.5	7823.35	7541.48	6592.57	1.41277	4.7323e-06	0.00144509	0.282963	-1.82131	down
MW0161982	(E)-(2,6-dioxopyridin-3-ylidene)-hydroxymethanolate	(E)-(2,6-dioxopyridin-3-ylidene)-hydroxymethanolate	Others	其它类	Others	其它	C6H4NO4-	3	0.5951	-	13371	13668.1	14579.1	6372.69	6019.58	5389.48	1.40586	9.71975e-05	0.0045602	0.427259	-1.22682	down
MW0148736	dTDP-4-amino-2,3,4,6-tetradeoxy-D-glucose	DTDP-4-氨基-2，3，4，6-四氧-D-葡萄糖；dTDP-[（2R，5S，6R)-5-氨基四氢-6-甲基-2H-吡喃-2-基]酯；DTDP-4-氨基-2，3，4，6-四脱氧-alpha-D-赤型吡喃己糖	Nucleotides and derivatives	核苷酸及其衍生物	Nucleotides and derivatives	核苷酸及其衍生物	C16H27N3O12P2	3	0.5931	-	2189.68	6209.7	4224.15	7472.16	8737.75	10408.6	1.1205	0.0358265	0.113465	2.10865	1.07632	up
MW0105873	Asp-Pro-Arg	L-天冬氨酰-L-脯氨酰-L-精氨酸	Amino acids and derivatives	氨基酸及其衍生物	Amino acids and derivatives	氨基酸及其衍生物	C15H26N6O6	3	0.5925	-	13123.4	19494.9	8504.9	55381.9	36310.9	15504.5	1.00209	0.189574	0.346726	2.60674	1.38224	up
MW0166214	15 epi-lipoxin B4	15 表脂氧素 B4	Lipids	脂质	Free fatty acids	游离脂肪酸	C20H31O5-	3	0.5873	-	6412.85	5714.49	5791.6	1064.96	869.74	2151.92	1.33589	0.00173165	0.0194459	0.228061	-2.13251	down
MW0143686	5-Oxoavermectin''1a'' aglycone	5-Oxoavermectin''1a''苷元	Others	其它类	Ketone compounds	酮类化合物	C34H46O8	3	0.5831	-	1148	5039.53	3045.51	243.89	1084.78	607.77	1.1154	0.157608	0.309224	0.209729	-2.2534	down
MW0151546	Ile-Phe-Phe	L-异亮氨酸-L-苯丙氨酸-L-苯丙氨酸	Amino acids and derivatives	氨基酸及其衍生物	Amino acids and derivatives	氨基酸及其衍生物	C24H31N3O4	3	0.583	-	13716.2	7871.58	17898.1	37761.4	31209	37662.1	1.27855	0.00451419	0.0318689	2.70052	1.43324	up
MW0158204	Trp-Met-Ala	色氨酸-甲硫氨酸-丙氨酸	Amino acids and derivatives	氨基酸及其衍生物	Amino acids and derivatives	氨基酸及其衍生物	C19H26N4O4S1	3	0.578	-	26504.5	43527.4	21062	102213	106456	100654	1.34307	0.00588402	0.0375463	3.39566	1.76369	up
MW0156783	Ser-His-Trp	丝氨酰-组氨酰-色氨酸	Amino acids and derivatives	氨基酸及其衍生物	Amino acids and derivatives	氨基酸及其衍生物	C20H24N6O5	3	0.578	-	16404.8	10994.2	17693.7	4506.97	8537.71	5578.76	1.252	0.0300279	0.101319	0.413004	-1.27577	down
MW0164153	1D-myo-inositol 2-(L-cysteiniumylamino)-2-deoxy-alpha-D-glucopyranoside	1D-肌醇 2-(L-半胱氨酰氨基)-2-脱氧-α-D-吡喃葡萄糖苷	Heterocyclic compounds	杂环化合物	Heterocyclic compounds	杂环化合物	C15H29N2O11S+	3	0.5765	-	8475.46	7998.69	6669.94	14698.4	21558.5	13150.8	1.29386	0.071456	0.18227	2.13479	1.09409	up
MW0150000	Glu-Glu-Thr	谷氨酸-谷氨酸-苏氨酸	Amino acids and derivatives	氨基酸及其衍生物	Amino acids and derivatives	氨基酸及其衍生物	C14H23N3O9	3	0.5746	-	14583.4	13814.8	19174.2	30436.5	24856.2	59505.8	1.1661	0.169475	0.323905	2.41313	1.27091	up
MW0164095	11-Hydroxylaurate	11-羟基月桂酸酯	Lipids	脂质	Free fatty acids	游离脂肪酸	C12H23O3-	3	0.574	-	3013.91	3304.73	2285.32	10853.2	10111.4	9966.78	1.39631	5.7598e-05	0.00390106	3.59501	1.84599	up
MW0168178	3-Hydroxy-9,10-secoandrosta-1,3,5(10)-triene-9,17-dione	3-Hydroxy-9,10-secoandrosta-1,3,5(10)-triene-9,17-dione	Phenolic acids	酚酸类	Phenolic acids	酚酸类	C19H24O3	3	0.571	-	4059.3	3143.39	4919.57	872.36	1979.26	489.88	1.21939	0.0131256	0.0595969	0.27565	-1.85909	down
MW0149957	Glu-Cys-Ala	谷氨酸-半胱氨酸-丙氨酸	Amino acids and derivatives	氨基酸及其衍生物	Amino acids and derivatives	氨基酸及其衍生物	C11H19N3O6S	3	0.5703	-	18535	16452.5	9789.22	34978.1	27764.6	44585.6	1.24967	0.0313603	0.104343	2.39697	1.26121	up
MW0125479	N-(tert-butyl)-2-(2-thienyl)acetamide	N-(叔丁基)-2-(2-噻吩基)乙酰胺	Alcohol and amines	醇、胺类	Amines	胺类	C10H15NOS	3	0.5702	-	115429	116609	136336	29427.5	38595.7	72630.4	1.25397	0.0143885	0.0635557	0.381823	-1.38902	down
MW0145073	Ancistrobrevine A	短角牛A	Heterocyclic compounds	杂环化合物	Heterocyclic compounds	杂环化合物	C27H33NO4	3	0.5673	-	4671.88	7620.38	8086.63	3509.35	2655.79	396.2	1.01548	0.0321967	0.105977	0.321967	-1.63501	down
MW0105811	Asparagylcysteyllysine	天冬酰胺半胱氨酸	Amino acids and derivatives	氨基酸及其衍生物	Amino acids and derivatives	氨基酸及其衍生物	C13H25N5O5S	3	0.5672	-	1672.75	1905.12	1809	6430.43	5792.62	5998.89	1.41322	0.000663345	0.0124155	3.38266	1.75816	up
MW0144561	Ala-Glu-Gly	L-丙氨酰-L-谷氨酰-甘氨酸	Amino acids and derivatives	氨基酸及其衍生物	Amino acids and derivatives	氨基酸及其衍生物	C10H17N3O6	3	0.5601	-	5148.56	13982.8	16199.9	72424.9	94154.5	80059.9	1.33409	0.00214258	0.0218944	6.98076	2.80338	up
MW0110079	Trp-Pro-Lys	色氨酸-脯氨酸-赖氨酸	Amino acids and derivatives	氨基酸及其衍生物	Amino acids and derivatives	氨基酸及其衍生物	C22H31N5O4	3	0.5569	-	813808	1.25723e+06	844014	650784	358545	195146	1.12662	0.0436574	0.129263	0.413192	-1.27512	down
MW0111875	Ncgc00384818-01_C27H30O11_	Ncgc00384818-01_C27H30O11_	Organic acids	有机酸	Organic acids	有机酸	C27H30O11	3	0.5565	-	1604.63	1391.99	4032.22	7595.76	6355.57	8496.96	1.24686	0.0100449	0.0504727	3.19374	1.67525	up
MW0166427	2-Keto-3,6-dideoxy-6-sulfogluconate	2-Keto-3,6-dideoxy-6-sulfogluconate	Organic acids	有机酸	Organic acids	有机酸	C6H8O8S-2	3	0.5528	-	805.66	919.78	414.42	1903.83	1533.76	2121.8	1.25387	0.00798574	0.0439392	2.59802	1.37741	up
MW0155217	Phe-His-Tyr	苯丙氨酰-组氨酰-酪氨酸	Amino acids and derivatives	氨基酸及其衍生物	Amino acids and derivatives	氨基酸及其衍生物	C24H27N5O5	3	0.5514	-	36915.8	39722.9	39814.7	4448.99	4820.85	6523.28	1.40801	2.61704e-05	0.00272587	0.135618	-2.88238	down
MW0110571	1-(3,5-dimethyl-1H-pyrazol-4-yl)ethanamine	1-(3,5-二甲基-1H-吡唑-4-基)乙胺	Alcohol and amines	醇、胺类	Amines	胺类	C7H13N3	3	0.5513	-	1373.57	2138.56	1541.31	4298.34	13323.9	15368	1.27668	0.110826	0.242624	6.52827	2.7067	up
MW0115974	NCGC00380319-01_C22H33NO5_6,6,9a-Trimethyl-3-oxo-1,3,5,5a,6,7,8,9,9a,9b-decahydronaphtho[1,2-c]furan-9-yl N-acetylvalinate	NCGC00380319-01_C22H33NO5_6,6,9a-Trimethyl-3-oxo-1,3,5,5a,6,7,8,9,9a,9b-decahydronaphtho[1,2-c]furan-9-yl N-acetylvalinate	Benzene and substituted derivatives	苯及其衍生物	Benzene and substituted derivatives	苯及其衍生物	C22H33NO5	3	0.5485	-	6553.48	2986.3	4602.49	446.24	1140.59	1679.79	1.22344	0.0594955	0.159663	0.230983	-2.11414	down
MW0106075	2-amino-4-(S-butylsulfonimidoyl)butanoate	2-氨基-4-(S-丁基磺酰亚胺基)丁酸酯	Amino acids and derivatives	氨基酸及其衍生物	Amino acids and derivatives	氨基酸及其衍生物	C8H18N2O3S	3	0.5466	-	30814.3	29763.4	27088.4	11621.1	17253	10521.9	1.3253	0.00614497	0.0382707	0.449388	-1.15397	down
MW0158149	Trp-Glu-Thr	色氨酸-谷氨酸-苏氨酸	Amino acids and derivatives	氨基酸及其衍生物	Amino acids and derivatives	氨基酸及其衍生物	C20H26N4O7	3	0.544	-	68610.3	69956.8	67815.6	32397.7	32984.4	20997.6	1.34543	0.00811018	0.0444249	0.418542	-1.25656	down
MW0165705	6-[3-Hydroxy-2-(3,5,7-trioxononanoyl)phenyl]-3,5-dioxohexanoate	6-[3-Hydroxy-2-(3,5,7-trioxonanoyl)phenyl]-3,5-dioxohexanoate	Phenolic acids	酚酸类	Phenolic acids	酚酸类	C21H21O9-	3	0.5436	-	2368.25	1626.3	897.03	5965.81	11870	10165.2	1.31918	0.0416228	0.125119	5.72432	2.5171	up
MW0148737	dTDP-4-amino-2,4-dideoxy-beta-L-xylose	dTDP-4-氨基-2,4-二脱氧-β-L-木糖	Nucleotides and derivatives	核苷酸及其衍生物	Nucleotides and derivatives	核苷酸及其衍生物	C15H25N3O13P2	3	0.5432	-	132798	799.34	545.05	118472	178482	178695	1.0225	0.106478	0.236368	3.54584	1.82613	up
MW0158547	Tyr-Lys-Trp	酪氨酸-赖氨酸-色氨酸	Amino acids and derivatives	氨基酸及其衍生物	Amino acids and derivatives	氨基酸及其衍生物	C26H33N5O5	3	0.5421	-	9312.46	8150.32	7240.32	28820.4	29666.1	37454.8	1.39939	0.0103852	0.0512713	3.88378	1.95746	up
MW0156324	R-4-benzyl-3-((R)-3-hydroxy-2,2-dimethyloctanoyl)oxazolidin-2-one	R-4-苄基-3-(（R)-3-羟基-2,2-二甲基辛酰基）恶唑烷丁-2-酮	Benzene and substituted derivatives	苯及其衍生物	Benzene and substituted derivatives	苯及其衍生物	C20H29NO4	3	0.5406	-	33083.9	19749.1	46905.5	9742.95	5082.49	23780.9	1.03136	0.109313	0.240508	0.387076	-1.36931	down
MW0158580	Tyr-Phe-Val	酪氨酸-苯丙氨酸-缬氨酸	Amino acids and derivatives	氨基酸及其衍生物	Amino acids and derivatives	氨基酸及其衍生物	C23H29N3O5	3	0.5382	-	9209.87	13375.4	6956.74	56749	53485.6	76316.1	1.38032	0.0134544	0.0607084	6.31477	2.65873	up
MW0148512	Dihydromethanophenazine	二氢甲烷吩嗪；2-(二氢五苯基氧基)-二氢吩嗪	Alcohol and amines	醇、胺类	Polyamines	多胺	C37H52N2O	3	0.5379	-	133032	65771.4	39876.3	34955.3	27997.3	12706.5	1.08651	0.184169	0.340771	0.31699	-1.65749	down
MW0107076	Gly-Leu-Lys	甘氨酸-亮氨酸-赖氨酸	Amino acids and derivatives	氨基酸及其衍生物	Amino acids and derivatives	氨基酸及其衍生物	C14H28N4O4	3	0.5368	-	54605	63763.4	60309.9	24245	23391.1	28216.1	1.39772	0.00124597	0.0162677	0.424518	-1.2361	down
Hmcp002539	Isorhamnetin-3-O-rhamnoside	异鼠李素-3-O-鼠李糖苷	Flavonoids	黄酮	Flavonols	黄酮醇	C22H22O11	3	0.5345	-	2203.02	254.96	551.57	8190.81	4150.97	8909.96	1.22185	0.0396018	0.121458	7.06143	2.81996	up
MW0157611	Thr-Gln-Ile	苏氨酰-谷氨酰胺-异亮氨酸	Amino acids and derivatives	氨基酸及其衍生物	Amino acids and derivatives	氨基酸及其衍生物	C15H28N4O6	3	0.5338	-	12416.4	14419.2	7606	1073.4	6030.38	1430.24	1.17043	0.0308673	0.103293	0.247782	-2.01286	down
MW0141803	1-O-(cis-9-Octadecenyl)-2-O-acetyl-sn-glycero-3-phosphocholine	1-O-(cis-9-Octadecenyl)-2-O-acetyl-sn-glycero-3-phosphocholine	GP	甘油磷脂类	PC	磷脂酰胆碱	C28H57NO7P+	3	0.533	-	60952	104220	80282.3	175602	220061	222290	1.3307	0.0036519	0.0284027	2.51758	1.33204	up
MW0148779	dTDP-beta-L-4-epi-vancosamine	dTDP-L-表古可胺;dTDP-β-L-4-表古可胺; dTDP-3-氨基-2,3,6-三苯氧基-3-甲基-β-L-阿拉伯糖基己糖	Nucleotides and derivatives	核苷酸及其衍生物	Nucleotides and derivatives	核苷酸及其衍生物	C17H29N3O13P2	3	0.532	-	125778	125502	122990	57959.1	56321.1	52943.1	1.41442	1.59691e-05	0.00224386	0.446798	-1.16231	down
MW0165939	cyanidin 3-O-glucoside-7-O-(6-O-(p-hydroxybenzoyl)-glucoside)	花青素 3-O-glucoside-7-O-(6-O-(p-hydroxybenzoyl)-glucoside)	Benzene and substituted derivatives	苯及其衍生物	Benzene and substituted derivatives	苯及其衍生物	C34H34O18	3	0.5291	-	249.26	130.13	330.45	74.71	31.84	24.74	1.26834	0.0714397	0.18227	0.184957	-2.43474	down
MW0164039	5-Guanidino-3-methyl-2-oxopentanoate	5-胍基-3-甲基-2-氧代戊酸酯；5-脒基-3-甲基-2-氧代戊酸酯	Others	其它类	Lactones	内酯类化合物	C7H13N3O3	3	0.5282	-	23747.4	32760.2	20894.9	16253.2	3641.46	3622.6	1.15238	0.0324707	0.106629	0.30383	-1.71866	down
MW0159131	Val-Phe-Tyr	缬氨酸-苯丙氨酸-酪氨酸	Amino acids and derivatives	氨基酸及其衍生物	Amino acids and derivatives	氨基酸及其衍生物	C23H29N3O5	3	0.5269	-	14409.1	7738.49	63169.9	2754.81	3632.27	6461.33	1.07609	0.300736	0.469932	0.150595	-2.73125	down
MW0145274	Arg-Asn-His	L-精氨酰-L-天冬酰胺-L-组氨酸	Amino acids and derivatives	氨基酸及其衍生物	Amino acids and derivatives	氨基酸及其衍生物	C16H27N9O5	3	0.5123	-	5538.98	5043.66	7469.68	2805.58	198.47	1749.56	1.04322	0.0138552	0.0618728	0.263324	-1.92509	down
MW0154244	N-Acetyl-N6,O-didemethylpuromycin-5'-phosphate	N-乙酰基-N6,O-二甲基嘌呤霉素-5'-磷酸	Nucleotides and derivatives	核苷酸及其衍生物	Nucleotides and derivatives	核苷酸及其衍生物	C22H28N7O9P	3	0.5101	-	2440.02	2616.42	2430.34	9947.48	9602.29	7180.63	1.39831	0.0175367	0.0719846	3.57035	1.83606	up
MW0152362	Leu-His-Phe	L-亮氨酸-L-组氨酸-L-苯丙氨酸	Amino acids and derivatives	氨基酸及其衍生物	Amino acids and derivatives	氨基酸及其衍生物	C21H29N5O4	3	0.5079	-	83435.8	88311.6	84522.5	136777	224962	227528	1.30807	0.0648962	0.170694	2.2994	1.20126	up
MW0010237	7-Deshydroxypyrogallin-4-carboxylic acid	7-去氧吡咯啉-4-羧酸	Organic acids	有机酸	Organic acids	有机酸	C12H8O6	3	0.5062	-	235.26	165.68	812.73	3355.07	3055.39	3233.62	1.30829	0.00178148	0.0195993	7.94621	2.99027	up
MW0151552	Ile-Phe-Val	L-异亮氨酸-L-苯丙氨酸-L-缬氨酸	Amino acids and derivatives	氨基酸及其衍生物	Amino acids and derivatives	氨基酸及其衍生物	C20H31N3O4	3	0.5043	-	168.09	264.95	584.58	2855.47	3249.08	1907.86	1.3312	0.0200893	0.0784037	7.87368	2.97704	up
MW0112962	N-[4,5-dihydroxy-2-[[4-[hydroxy(phenyl)methyl]-5-oxo-3-phenyl-2H-furan-2-yl]oxy]-6-(methoxymethyl)oxan-3-yl]acetamide	N-[4,5-二羟基-2-[[4-[羟基(苯基)甲基]-5-氧代-3-苯基-2H-呋喃-2-基]氧基]-6-(甲氧基甲基)氧杂-3 -基]乙酰胺	Benzene and substituted derivatives	苯及其衍生物	Benzene and substituted derivatives	苯及其衍生物	C26H29NO9	3	0.5038	-	8294.6	19327	11570.5	5972.14	2281.91	2635.2	1.22147	0.0886616	0.211087	0.277843	-1.84766	down
MW0151667	Ile-Gln	L-异亮氨酸-L-谷氨酰胺	Amino acids and derivatives	氨基酸及其衍生物	Amino acids and derivatives	氨基酸及其衍生物	C11H21N3O4	2	0.7468	59652-60-7	12317.8	13580.2	14004.5	4268.26	6677.02	4864.68	1.36022	0.00134577	0.0171041	0.396214	-1.33565	down
MW0145576	Arg-Val-Tyr-Phe-Phe	Arg-Val-Tyr-Phe-Phe	Amino acids and derivatives	氨基酸及其衍生物	Amino acids and derivatives	氨基酸及其衍生物	C38H50N8O7	2	0.9296	-	4513.8	1394.37	3812.57	14292.5	14345.4	16564.7	1.29379	0.000775706	0.0129656	4.65012	2.21727	up
MW0158350	Tyr-Ala-Asp-Lys	酪氨酸-丙氨酸-天冬氨酸-赖氨酸	Amino acids and derivatives	氨基酸及其衍生物	Amino acids and derivatives	氨基酸及其衍生物	C22H33N5O8	2	0.9237	-	52429	44002.9	43052.8	154707	158399	151189	1.41001	2.04356e-05	0.00253929	3.32864	1.73493	up
MW0150452	Gly-Phe-Ile-Ser-Arg	甘氨酸-苯丙氨酸-异亮氨酸-丝氨酸-精氨酸	Amino acids and derivatives	氨基酸及其衍生物	Amino acids and derivatives	氨基酸及其衍生物	C26H42N8O7	2	0.9145	-	7602.32	17307	1889.6	45771.9	47224.5	66629.2	1.20522	0.00796921	0.0439392	5.95642	2.57445	up
MW0145522	Arg-Thr-Lys-Arg	Arg-Thr-Lys-Arg	Amino acids and derivatives	氨基酸及其衍生物	Amino acids and derivatives	氨基酸及其衍生物	C22H45N11O6	2	0.9071	-	1983.34	2119.98	3212.46	14965.1	8007.14	7788.73	1.32944	0.0764323	0.190553	4.20474	2.07202	up
MW0155082	Phe-Ala-Thr-Asp-Asp	Phe-Ala-Thr-Asp-Asp	Amino acids and derivatives	氨基酸及其衍生物	Amino acids and derivatives	氨基酸及其衍生物	C24H33N5O11	2	0.9062	-	25819.6	23804.1	20248.8	91966.9	87697.7	83175.1	1.40844	9.50919e-05	0.00454623	3.76171	1.91139	up
MW0158961	Val-Gln-Ala-Arg	Val-Gln-Ala-Arg	Amino acids and derivatives	氨基酸及其衍生物	Amino acids and derivatives	氨基酸及其衍生物	C19H36N8O6	2	0.9061	-	66460.8	20725.8	94305.1	264406	134650	150107	1.09995	0.0762277	0.190116	3.02583	1.59733	up
MW0151484	Ile-Leu-Arg-Lys	Ile-Leu-Arg-Lys	Amino acids and derivatives	氨基酸及其衍生物	Amino acids and derivatives	氨基酸及其衍生物	C24H48N8O5	2	0.9048	-	168482	187488	181189	335954	421640	458215	1.37795	0.0225569	0.0844844	2.26341	1.1785	up
MW0151568	Ile-Ser-Arg-Lys	Ile-Ser-Arg-Lys	Amino acids and derivatives	氨基酸及其衍生物	Amino acids and derivatives	氨基酸及其衍生物	C21H42N8O6	2	0.8855	-	95178.3	89033.8	88210.5	174938	224654	234072	1.38329	0.0211671	0.0808154	2.32603	1.21787	up
MW0155865	Pro-Gly-Glu-Cys-Leu	Pro-Gly-Glu-Cys-Leu	Amino acids and derivatives	氨基酸及其衍生物	Amino acids and derivatives	氨基酸及其衍生物	C21H35N5O8S	2	0.8797	-	1.05244e+06	1.14344e+06	1.14167e+06	2.2149e+06	2.26701e+06	2.39301e+06	1.41083	0.000211766	0.00674954	2.05988	1.04256	up
MW0146257	Asp-Ser-Glu-Glu-Glu	Asp-Ser-Glu-Glu-Glu	Amino acids and derivatives	氨基酸及其衍生物	Amino acids and derivatives	氨基酸及其衍生物	C22H33N5O15	2	0.8735	-	46770.7	37316.4	40853.4	101175	99255	118851	1.39404	0.0034889	0.0278893	2.55546	1.35358	up
MW0145399	Arg-Ile-Ser-Ala-Gln	Arg-Ile-Ser-Ala-Gln	Amino acids and derivatives	氨基酸及其衍生物	Amino acids and derivatives	氨基酸及其衍生物	C23H43N9O8	2	0.8732	-	9495.03	7908.29	6740.37	2595.68	2707.24	738.22	1.2296	0.00477351	0.0330536	0.250216	-1.99875	down
MW0156644	Ser-Arg-Ile-Lys	Ser-Arg-Ile-Lys	Amino acids and derivatives	氨基酸及其衍生物	Amino acids and derivatives	氨基酸及其衍生物	C21H42N8O6	2	0.8703	-	27776.4	24625	44592	90033.4	94484.8	96616.5	1.34521	0.00602386	0.0378717	2.89849	1.5353	up
MW0151222	HoPhe-Ser-OH	HoPhe-Ser-OH	Others	其它类	Lactones	内酯类化合物	C18H18N2O7	2	0.8657	-	101542	68124.6	112805	237447	217746	204978	1.33104	0.00237244	0.0233016	2.33713	1.22474	up
MW0152974	Lys-Gly-Gln-Lys-Val	Lys-Gly-Gln-Lys-Val	Amino acids and derivatives	氨基酸及其衍生物	Amino acids and derivatives	氨基酸及其衍生物	C24H46N8O7	2	0.8605	-	9543.15	15428.3	16348.4	44515.2	50337.3	39648.3	1.35563	0.00191501	0.0203475	3.25511	1.70271	up
MW0151650	Ile-Val-Leu-Glu	Ile-Val-Leu-Glu	Amino acids and derivatives	氨基酸及其衍生物	Amino acids and derivatives	氨基酸及其衍生物	C22H40N4O7	2	0.8518	-	29252.1	39370.7	31646	75271.3	151532	157008	1.31942	0.0679876	0.176348	3.82783	1.93653	up
MW0158951	Val-Cys-Ala-Asp-Met	Val-Cys-Ala-Asp-Met	Amino acids and derivatives	氨基酸及其衍生物	Amino acids and derivatives	氨基酸及其衍生物	C20H35N5O8S2	2	0.8414	-	12641	13956.1	10376.1	44205.9	26635.9	17103.8	1.15072	0.163555	0.316407	2.37864	1.25013	up
MW0151652	Ile-Val-Lys-Arg-Lys	Ile-Val-Lys-Arg-Lys	Amino acids and derivatives	氨基酸及其衍生物	Amino acids and derivatives	氨基酸及其衍生物	C29H58N10O6	2	0.8401	-	69597.7	98743.8	89841.5	196018	176178	173378	1.36002	0.00119079	0.0159312	2.11313	1.07938	up
MW0144639	Ala-Leu-Leu-Leu-Trp	Ala-Leu-Leu-Leu-Trp	Amino acids and derivatives	氨基酸及其衍生物	Amino acids and derivatives	氨基酸及其衍生物	C32H50N6O6	2	0.8401	-	73227.4	93531.7	44829.8	15466.1	18192.2	12566.7	1.34835	0.0580531	0.156883	0.218466	-2.19452	down
MW0159011	Val-Gly-Lys-Lys-Gln	Val-Gly-Lys-Lys-Gln	Amino acids and derivatives	氨基酸及其衍生物	Amino acids and derivatives	氨基酸及其衍生物	C24H46N8O7	2	0.8342	-	84523	64938.4	54455.9	134066	343368	183797	1.24465	0.134541	0.277006	3.24265	1.69717	up
MW0146111	Asp-Gly-Asp-Lys-Asn	Asp-Gly-Asp-Lys-Asn	Amino acids and derivatives	氨基酸及其衍生物	Amino acids and derivatives	氨基酸及其衍生物	C20H33N7O11	2	0.826	-	9546.98	20275	20566.7	53287.3	49062.4	62406.7	1.3044	0.00210732	0.02168	3.26971	1.70916	up
MW0153169	Lys-Tyr-Ala-Asp	Lys-Tyr-Ala-Asp	Amino acids and derivatives	氨基酸及其衍生物	Amino acids and derivatives	氨基酸及其衍生物	C22H33N5O8	2	0.8243	-	14964.7	17736.6	17364.3	69063	70565.7	69783.7	1.41376	1.62198e-05	0.00224386	4.18275	2.06445	up
MW0150944	His-Gly-Phe-His-Val	组氨酸-甘氨酸-苯丙氨酸-组氨酸-缬氨酸	Amino acids and derivatives	氨基酸及其衍生物	Amino acids and derivatives	氨基酸及其衍生物	C28H37N9O6	2	0.8103	-	23846.6	43203.6	43513.1	2592.24	5119.41	5521.41	1.36104	0.0356967	0.113286	0.119688	-3.06265	down
MW0157545	Thr-Arg-Gln-Glu	Thr-Arg-Gln-Glu	Amino acids and derivatives	氨基酸及其衍生物	Amino acids and derivatives	氨基酸及其衍生物	C20H36N8O9	2	0.81	-	292.92	921.83	701.14	1568.57	3436.75	3543.78	1.23275	0.0651134	0.171011	4.46221	2.15776	up
MW0156823	Ser-Leu-Lys-Glu	Ser-Leu-Lys-Glu	Amino acids and derivatives	氨基酸及其衍生物	Amino acids and derivatives	氨基酸及其衍生物	C20H37N5O8	2	0.8066	-	1173.85	1226.89	1610.84	394.3	379.62	1141.27	1.07526	0.0899504	0.21314	0.477415	-1.06668	down
MW0155411	Phe-Val-Lys-Lys	Phe-Val-Lys-Lys	Amino acids and derivatives	氨基酸及其衍生物	Amino acids and derivatives	氨基酸及其衍生物	C26H44N6O5	2	0.7937	-	3524.42	2997.85	3980.75	7710.53	7198.03	12491.9	1.31111	0.075236	0.188583	2.60881	1.38339	up
MW0145546	Arg-Tyr-Leu-Lys	Arg-Tyr-Leu-Lys	Amino acids and derivatives	氨基酸及其衍生物	Amino acids and derivatives	氨基酸及其衍生物	C27H46N8O6	2	0.7911	-	119027	58139.6	46546.8	8110.85	10274.6	15314.1	1.33067	0.104958	0.234273	0.150637	-2.73085	down
MW0155896	Pro-Ile-His-Asp-Arg	Pro-Ile-His-Asp-Arg	Amino acids and derivatives	氨基酸及其衍生物	Amino acids and derivatives	氨基酸及其衍生物	C27H44N10O8	2	0.7887	-	15385.1	17715.5	4676.56	1016.92	5143.18	1402.4	1.12952	0.117709	0.252422	0.200187	-2.32058	down
MW0152907	Lys-Asp-Met-Thr-Cys	Lys-Asp-Met-Thr-Cys	Amino acids and derivatives	氨基酸及其衍生物	Amino acids and derivatives	氨基酸及其衍生物	C22H40N6O9S2	2	0.7819	-	6129.98	7790.44	9457.61	3592.16	3249.8	3135.52	1.3526	0.0408587	0.123886	0.426789	-1.22841	down
MW0145775	Asn-His-Phe-Asp	Asn-His-Phe-Asp	Amino acids and derivatives	氨基酸及其衍生物	Amino acids and derivatives	氨基酸及其衍生物	C23H29N7O8	2	0.7761	-	2189.34	2849.43	4052.33	10230.4	12828.1	13575.1	1.36526	0.00378746	0.0289585	4.0296	2.01064	up
MW0150117	Glu-Phe-Tyr-Tyr-Arg	谷氨酸-苯丙氨酸-酪氨酸-酪氨酸-精氨酸	Amino acids and derivatives	氨基酸及其衍生物	Amino acids and derivatives	氨基酸及其衍生物	C38H48N8O10	2	0.7741	-	13348	10784	14031.8	49743.2	28854.4	33279.1	1.34006	0.0576943	0.156304	2.9315	1.55164	up
MW0145888	Asn-Ser-Leu-Arg	Asn-Ser-Leu-Arg	Amino acids and derivatives	氨基酸及其衍生物	Amino acids and derivatives	氨基酸及其衍生物	C19H36N8O7	2	0.7729	-	41702.8	40852	58213.5	111685	117482	125317	1.37349	0.000862678	0.0137076	2.5182	1.3324	up
MW0151004	His-Leu-Val-Leu-Arg	组氨酸-亮氨酸-缬氨酸-亮氨酸-精氨酸	Amino acids and derivatives	氨基酸及其衍生物	Amino acids and derivatives	氨基酸及其衍生物	C29H52N10O6	2	0.7726	-	50454.5	48568.6	56280.7	89619.6	128612	99148.2	1.34648	0.0396606	0.121524	2.04361	1.03112	up
MW0145959	Asn-Val-Phe-Lys	Asn-Val-Phe-Lys	Amino acids and derivatives	氨基酸及其衍生物	Amino acids and derivatives	氨基酸及其衍生物	C24H38N6O6	2	0.772	-	25636.6	36043.1	28368.9	75322.7	67723.9	57806.6	1.3524	0.00621039	0.0386042	2.2305	1.15737	up
MW0145340	Arg-Glu-Arg-Val-Tyr	Arg-Glu-Arg-Val-Tyr	Amino acids and derivatives	氨基酸及其衍生物	Amino acids and derivatives	氨基酸及其衍生物	C31H51N11O9	2	0.7684	-	98552.2	106261	94127.8	244436	246446	270826	1.41028	0.000864367	0.0137076	2.54802	1.34938	up
MW0146027	Asp-Arg-Lys-Lys	Asp-Arg-Lys-Lys	Amino acids and derivatives	氨基酸及其衍生物	Amino acids and derivatives	氨基酸及其衍生物	C22H43N9O7	2	0.7663	-	37151.5	42248.2	24593.5	11964.2	17652.9	5255.77	1.18065	0.0274629	0.095234	0.335338	-1.57631	down
MW0145771	Asn-His-Ile-Arg	Asn-His-Ile-Arg	Amino acids and derivatives	氨基酸及其衍生物	Amino acids and derivatives	氨基酸及其衍生物	C22H38N10O6	2	0.7663	-	3194.96	5171.87	7905.2	18138.7	14583.4	11428.2	1.23615	0.02116	0.0808154	2.71326	1.44003	up
MW0150122	Glu-Pro-Gly-Tyr-Ser	谷氨酸-脯氨酸-甘氨酸-酪氨酸-丝氨酸	Amino acids and derivatives	氨基酸及其衍生物	Amino acids and derivatives	氨基酸及其衍生物	C24H33N5O10	2	0.7613	-	5273.14	5917.95	5527.43	2160.31	1554.9	3447.31	1.25903	0.0205426	0.0794368	0.428418	-1.22291	down
MW0150362	Gly-Glu-Tyr-Ser-Val	甘氨酸-谷氨酸-酪氨酸-丝氨酸-缬氨酸	Amino acids and derivatives	氨基酸及其衍生物	Amino acids and derivatives	氨基酸及其衍生物	C24H35N5O10	2	0.7604	-	1904.6	7809.85	6080.68	24487.8	9938.34	16282.6	1.10407	0.0940671	0.219535	3.21041	1.68276	up
MW0151427	Ile-Glu-Val-Asp-Leu	Ile-Glu-Val-Asp-Leu	Amino acids and derivatives	氨基酸及其衍生物	Amino acids and derivatives	氨基酸及其衍生物	C26H45N5O10	2	0.7603	-	35193.3	32468.8	33743.4	8220.69	5924.55	7111.29	1.40703	1.67153e-05	0.00226422	0.209619	-2.25416	down
MW0158129	Trp-Gln-Gln-Asp-Glu	Trp-Gln-Gln-Asp-Glu	Amino acids and derivatives	氨基酸及其衍生物	Amino acids and derivatives	氨基酸及其衍生物	C30H40N8O12	2	0.7587	-	17346.5	17862.9	13290.6	29479.7	41623.1	35606.5	1.33922	0.0192382	0.0760765	2.20019	1.13763	up
MW0159139	Val-Pro-Glu-Lys-Lys	Val-Pro-Glu-Lys-Lys	Amino acids and derivatives	氨基酸及其衍生物	Amino acids and derivatives	氨基酸及其衍生物	C27H49N7O8	2	0.7565	-	72616.6	116903	133766	36752.3	29035.6	41540	1.31945	0.0536241	0.148875	0.331991	-1.59079	down
MW0153195	Lys-Val-Asn-Val-Asp	Lys-Val-Asn-Val-Asp	Amino acids and derivatives	氨基酸及其衍生物	Amino acids and derivatives	氨基酸及其衍生物	C24H43N7O9	2	0.755	-	3545.83	3521.13	6132.55	2639.48	763.62	427.26	1.12952	0.0505355	0.143211	0.29019	-1.78493	down
MW0156981	Ser-Val-Lys-Arg	Ser-Val-Lys-Arg	Amino acids and derivatives	氨基酸及其衍生物	Amino acids and derivatives	氨基酸及其衍生物	C20H40N8O6	2	0.7536	-	2778.14	2514.79	4993.26	7324.56	7787.41	5872.09	1.20934	0.0250927	0.0900583	2.04002	1.02859	up
MW0155183	Phe-Glu-Lys-Ala-Ala	Phe-Glu-Lys-Ala-Ala	Amino acids and derivatives	氨基酸及其衍生物	Amino acids and derivatives	氨基酸及其衍生物	C26H40N6O8	2	0.7529	-	1944.39	647.39	226.69	9911.2	4470.58	6265.08	1.2282	0.0541528	0.149894	7.32556	2.87294	up
MW0151404	Ile-Gln-Ser-Glu	Ile-Gln-Ser-Glu	Amino acids and derivatives	氨基酸及其衍生物	Amino acids and derivatives	氨基酸及其衍生物	C19H33N5O9	2	0.7514	-	29052.6	31164.2	34022.1	14033.9	16331.1	16246.1	1.39252	0.00222825	0.0224388	0.494605	-1.01565	down
MW0145884	Asn-Ser-Glu-Asp-Thr	Asn-Ser-Glu-Asp-Thr	Amino acids and derivatives	氨基酸及其衍生物	Amino acids and derivatives	氨基酸及其衍生物	C20H32N6O13	2	0.7501	-	7173.4	4218.7	8810.7	16226.8	24096.5	13368.2	1.23513	0.0572412	0.155519	2.65763	1.41014	up
MW0145540	Arg-Tyr-Gln-Lys	Arg-Tyr-Gln-Lys	Amino acids and derivatives	氨基酸及其衍生物	Amino acids and derivatives	氨基酸及其衍生物	C26H43N9O7	2	0.75	-	13197	29351.8	12681.2	37851.6	46752.7	31907.1	1.14842	0.0456457	0.133493	2.10956	1.07694	up
MW0145953	Asn-Val-Ile-Glu	Asn-Val-Ile-Glu	Amino acids and derivatives	氨基酸及其衍生物	Amino acids and derivatives	氨基酸及其衍生物	C20H35N5O8	2	0.7495	-	20080.9	21302.3	21314.9	7466.11	6099.82	5729.98	1.40432	4.31267e-05	0.00346185	0.307759	-1.70013	down
MW0152975	Lys-Gly-Gly-Asn-Glu	Lys-Gly-Gly-Asn-Glu	Amino acids and derivatives	氨基酸及其衍生物	Amino acids and derivatives	氨基酸及其衍生物	C19H33N7O9	2	0.7486	-	2147.71	3135.44	3846.75	866.27	1538.23	740.97	1.26069	0.0373194	0.116715	0.344524	-1.53732	down
MW0154273	Nap-His-OH	Nap-His-OH	Amino acids and derivatives	氨基酸及其衍生物	Amino acids and derivatives	氨基酸及其衍生物	C24H20N4O6	2	0.7471	-	137.49	65.72	80.62	1099.75	103.6	1391.18	1.0241	0.186455	0.343047	9.14114	3.19237	up
MW0154295	Nap-Trp-OH	Nap-Trp-OH	Amino acids and derivatives	氨基酸及其衍生物	Amino acids and derivatives	氨基酸及其衍生物	C29H23N3O6	2	0.7469	-	26991.4	12773.9	23161.7	3343.99	13180	7101.68	1.08127	0.0714448	0.18227	0.375445	-1.41333	down
MW0146152	Asp-Ile-Lys-Glu-Met	Asp-Ile-Lys-Glu-Met	Amino acids and derivatives	氨基酸及其衍生物	Amino acids and derivatives	氨基酸及其衍生物	C26H46N6O10S	2	0.7456	-	4007.94	2873.06	4586.73	7159.67	7708.24	9558.2	1.30363	0.0108182	0.0525711	2.12999	1.09084	up
MW0145570	Arg-Val-Phe-Asp	Arg-Val-Phe-Asp	Amino acids and derivatives	氨基酸及其衍生物	Amino acids and derivatives	氨基酸及其衍生物	C24H37N7O7	2	0.7455	-	105727	104120	87340.9	42602.7	56457	33416.7	1.31817	0.00371925	0.0286863	0.445767	-1.16564	down
MW0157733	Thr-Lys-Phe-Ser-Val	Thr-Lys-Phe-Ser-Val	Amino acids and derivatives	氨基酸及其衍生物	Amino acids and derivatives	氨基酸及其衍生物	C27H44N6O8	2	0.7421	-	19819	10673.8	9717.15	74329.7	59758.4	203208	1.30139	0.161287	0.314072	8.38837	3.06839	up
MW0156918	Ser-Thr-Arg-Asp	Ser-Thr-Arg-Asp	Amino acids and derivatives	氨基酸及其衍生物	Amino acids and derivatives	氨基酸及其衍生物	C17H31N7O9	2	0.7407	-	6523.99	5484.05	1936.37	19087.3	19101	16927.6	1.26358	0.00309271	0.0266895	3.95255	1.98278	up
MW0145703	Asn-Asp-Leu-Asp	Asn-Asp-Leu-Asp	Amino acids and derivatives	氨基酸及其衍生物	Amino acids and derivatives	氨基酸及其衍生物	C18H29N5O10	2	0.7396	-	384684	365453	369733	157858	163440	162990	1.41628	0.000286153	0.00788377	0.432449	-1.2094	down
MW0144808	Ala-Val-Thr-Asp-Asp	Ala-Val-Thr-Asp-Asp	Amino acids and derivatives	氨基酸及其衍生物	Amino acids and derivatives	氨基酸及其衍生物	C20H33N5O11	2	0.7382	-	16977.3	18499.8	28776.8	9003.85	9940.42	9884.25	1.30274	0.0849978	0.205078	0.448666	-1.15629	down
MW0145407	Arg-Leu-Arg-Glu-Lys	Arg-Leu-Arg-Glu-Lys	Amino acids and derivatives	氨基酸及其衍生物	Amino acids and derivatives	氨基酸及其衍生物	C29H56N12O8	2	0.7337	-	18424	3490.91	16984	74424.6	101265	81195.7	1.25757	0.00335462	0.0276796	6.60391	2.72332	up
MW0144619	Ala-Ile-Leu-Asp	Ala-Ile-Leu-Asp	Amino acids and derivatives	氨基酸及其衍生物	Amino acids and derivatives	氨基酸及其衍生物	C19H34N4O7	2	0.7287	-	38945.3	37774	41588.5	7161.07	6196.01	9609.13	1.40018	3.35014e-05	0.00315037	0.194123	-2.36496	down
MW0146080	Asp-Gln-Gln-Ala-Glu	Asp-Gln-Gln-Ala-Glu	Amino acids and derivatives	氨基酸及其衍生物	Amino acids and derivatives	氨基酸及其衍生物	C22H35N7O12	2	0.7253	-	110.85	441.52	271.62	69.44	86.12	37.79	1.16261	0.155902	0.307081	0.234651	-2.09141	down
MW0156821	Ser-Leu-Leu-Ser-Phe	Ser-Leu-Leu-Ser-Phe	Amino acids and derivatives	氨基酸及其衍生物	Amino acids and derivatives	氨基酸及其衍生物	C27H43N5O8	2	0.7232	-	1197.42	2018.68	998.08	883.79	294.27	552.85	1.10025	0.0998132	0.227794	0.410735	-1.28372	down
MW0151465	Ile-Ile-Arg-Ser-Ser	Ile-Ile-Arg-Ser-Ser	Amino acids and derivatives	氨基酸及其衍生物	Amino acids and derivatives	氨基酸及其衍生物	C24H46N8O8	2	0.7219	-	25160	20666.6	11576.3	44522.5	58818.2	63299.2	1.28637	0.00838914	0.0454551	2.90299	1.53754	up
MW0150512	Gly-Tyr-Asn-Ser-Tyr	甘氨酸-酪氨酸-天门冬酰氨-丝氨酸-酪氨酸	Amino acids and derivatives	氨基酸及其衍生物	Amino acids and derivatives	氨基酸及其衍生物	C27H34N6O10	2	0.7188	-	5602.75	3015.7	9723.48	45686.8	37156.6	42749.9	1.34274	0.000481363	0.010542	6.84734	2.77554	up
MW0144468	Ala-Arg-Asp-Glu-Thr	Ala-Arg-Asp-Glu-Thr	Amino acids and derivatives	氨基酸及其衍生物	Amino acids and derivatives	氨基酸及其衍生物	C22H38N8O11	2	0.7153	-	11213.8	23515	10175.6	48549.4	115335	33277.3	1.19397	0.178443	0.334555	4.3907	2.13445	up
MW0158995	Val-Glu-Phe-Asp	Val-Glu-Phe-Asp	Amino acids and derivatives	氨基酸及其衍生物	Amino acids and derivatives	氨基酸及其衍生物	C23H32N4O9	2	0.7084	-	34864.6	36303.3	40885.4	16933.5	16882.9	22145.2	1.36161	0.0017678	0.0195148	0.499419	-1.00168	down
MW0156638	Ser-Arg-Ala-Lys	Ser-Arg-Ala-Lys	Amino acids and derivatives	氨基酸及其衍生物	Amino acids and derivatives	氨基酸及其衍生物	C18H36N8O6	2	0.7054	-	6949.19	7310.04	3268.35	23805.4	23921.8	25571.9	1.33825	0.00144543	0.0177893	4.18193	2.06417	up
MW0146264	Asp-Ser-Val-Ile-Ser	Asp-Ser-Val-Ile-Ser	Amino acids and derivatives	氨基酸及其衍生物	Amino acids and derivatives	氨基酸及其衍生物	C21H37N5O10	3	0.998	-	5232.93	4276.6	4287.12	867.72	477.07	783.21	1.3884	0.0029079	0.0260866	0.15424	-2.69675	down
MW0144212	Abu-Ser-OH	Abu-Ser-OH	Amino acids and derivatives	氨基酸及其衍生物	Amino acids and derivatives	氨基酸及其衍生物	C12H14N2O7	3	0.9937	-	8631.21	72435.4	46238.4	3141.45	2848.35	2376.14	1.2464	0.165564	0.319057	0.0657157	-3.92762	down
MW0158700	TyrMe-Asp-OH	TyrMe-Asp-OH	Amino acids and derivatives	氨基酸及其衍生物	Amino acids and derivatives	氨基酸及其衍生物	C20H20N2O9	3	0.9931	-	17433.5	23050.7	18501.6	8624.11	6871.53	10962.6	1.32011	0.00907479	0.0475243	0.448553	-1.15665	down
MW0159005	Val-Glu-Val-Ala-Glu	Val-Glu-Val-Ala-Glu	Amino acids and derivatives	氨基酸及其衍生物	Amino acids and derivatives	氨基酸及其衍生物	C23H39N5O10	3	0.9861	-	1065.58	897.53	363.01	246.85	206.52	437.33	1.0632	0.141906	0.287258	0.382912	-1.38491	down
MW0150193	Glu-Tyr-Ile-Glu	谷氨酸-酪氨酸-异亮氨酸-谷氨酸	Amino acids and derivatives	氨基酸及其衍生物	Amino acids and derivatives	氨基酸及其衍生物	C25H36N4O10	3	0.9118	-	20434.9	34472.1	14860.4	46156.1	55168.5	60911.8	1.22925	0.0156885	0.0668457	2.32539	1.21747	up
MW0156476	S1P Lyase Fluorogenic Substrate	S1P Lyase Fluorogenic Substrate	Benzene and substituted derivatives	苯及其衍生物	Benzene and substituted derivatives	苯及其衍生物	C14H18NO8P	3	0.7498	-	17239.3	23159.7	7254.63	5240.99	1511.56	1630.28	1.22097	0.0975943	0.224781	0.175912	-2.50708	down
MW0158695	Tyr-Leu-Pro-Leu-Arg-Phe-NH2	Tyr-Leu-Pro-Leu-Arg-Phe-NH2	Amino acids and derivatives	氨基酸及其衍生物	Amino acids and derivatives	氨基酸及其衍生物	C41H62N10O7	3	0.7333	-	21499	22762.8	23960.1	81929.9	72490.2	69973.6	1.41123	0.00372852	0.0286897	3.28917	1.71772	up
MW0149994	Glu-Glu-Leu-Ile-Thr	谷氨酸-谷氨酸-亮氨酸-异亮氨酸-苏氨酸	Amino acids and derivatives	氨基酸及其衍生物	Amino acids and derivatives	氨基酸及其衍生物	C26H45N5O11	3	0.7264	-	44694.2	43541.9	49253.8	90601.1	100119	97138	1.40606	0.000339225	0.00864958	2.09367	1.06603	up
MW0151570	Ile-Ser-Asn-Asp	Ile-Ser-Asn-Asp	Amino acids and derivatives	氨基酸及其衍生物	Amino acids and derivatives	氨基酸及其衍生物	C17H29N5O9	3	0.7243	-	416.72	2050.23	557.09	10088.6	5191.72	2761	1.19039	0.139133	0.283676	5.96596	2.57675	up
MW0155968	Pro-Phe-Tyr-Leu-Arg	Pro-Phe-Tyr-Leu-Arg	Amino acids and derivatives	氨基酸及其衍生物	Amino acids and derivatives	氨基酸及其衍生物	C35H50N8O7	3	0.7236	-	95.14	462.2	973.39	1244.12	2668.84	2102.53	1.07982	0.0474826	0.137397	3.92982	1.97446	up
MW0153048	Lys-Leu-Thr-Arg	Lys-Leu-Thr-Arg	Amino acids and derivatives	氨基酸及其衍生物	Amino acids and derivatives	氨基酸及其衍生物	C22H44N8O6	3	0.7209	-	449.27	1307.88	971.12	4683.25	2812.46	4919.43	1.28623	0.0281625	0.0968849	4.55055	2.18604	up
MW0153729	Met(O)-Glu	Met(O)-Glu	Amino acids and derivatives	氨基酸及其衍生物	Amino acids and derivatives	氨基酸及其衍生物	C10H18N2O6S	3	0.7164	-	14962.2	24619.7	24117.1	7594.18	5585.67	4829.33	1.34457	0.0329774	0.107831	0.282723	-1.82254	down
MW0158456	Tyr-Glu-Gln-Asp	酪氨酸-谷氨酸-谷氨酸-天冬氨酸	Amino acids and derivatives	氨基酸及其衍生物	Amino acids and derivatives	氨基酸及其衍生物	C23H31N5O11	3	0.6972	-	429.92	743.81	161.66	4985.17	3974.88	2923.62	1.31496	0.0209317	0.080436	8.89903	3.15365	up
MW0144469	Ala-Arg-Asp-Pro-Val	Ala-Arg-Asp-Pro-Val	Amino acids and derivatives	氨基酸及其衍生物	Amino acids and derivatives	氨基酸及其衍生物	C23H40N8O8	3	0.6874	-	1265.29	761.88	1211.1	1805.52	2102.34	3582.75	1.19164	0.113656	0.246579	2.31315	1.20986	up
MW0144200	Abu-Ala-OH	Abu-Ala-OH	Amino acids and derivatives	氨基酸及其衍生物	Amino acids and derivatives	氨基酸及其衍生物	C12H14N2O6	3	0.6811	-	772.95	960.28	1868.36	475.84	569.05	720.05	1.05913	0.208245	0.36884	0.490045	-1.02901	down
MW0148009	Cys-Gly-Asp-Val-Met	半胱氨酸-甘氨酸-天门冬氨酸-缬氨酸-蛋氨酸	Amino acids and derivatives	氨基酸及其衍生物	Amino acids and derivatives	氨基酸及其衍生物	C19H33N5O8S2	3	0.6758	-	4426.52	6090.1	6354.72	2373.73	2216.55	3006.57	1.33018	0.0237256	0.0869091	0.450281	-1.1511	down
MW0156854	Ser-Lys-Val-Glu	Ser-Lys-Val-Glu	Amino acids and derivatives	氨基酸及其衍生物	Amino acids and derivatives	氨基酸及其衍生物	C19H35N5O8	3	0.6721	-	30330.5	30560	18416.3	14147.1	11037.9	9990.37	1.27091	0.0561608	0.153234	0.443536	-1.17288	down
MW0152453	Leu-Phe-Lys-Lys	Leu-Phe-Lys-Lys	Amino acids and derivatives	氨基酸及其衍生物	Amino acids and derivatives	氨基酸及其衍生物	C27H46N6O5	3	0.6631	-	59423.5	70001.1	30828.4	12090.2	13539.7	14368.9	1.32348	0.0751885	0.188576	0.249598	-2.00232	down
MW0145360	Arg-Gly-Glu-Val-Leu	Arg-Gly-Glu-Val-Leu	Amino acids and derivatives	氨基酸及其衍生物	Amino acids and derivatives	氨基酸及其衍生物	C24H44N8O8	3	0.6622	-	2275.15	5025.73	3705.9	950.84	1583.93	1405.97	1.23933	0.0902101	0.213359	0.358028	-1.48185	down
MW0145864	Asn-Phe-Ser-Arg	Asn-Phe-Ser-Arg	Amino acids and derivatives	氨基酸及其衍生物	Amino acids and derivatives	氨基酸及其衍生物	C22H34N8O7	3	0.6611	-	511.14	469.9	684.77	158.43	162.96	308.62	1.27493	0.016086	0.0680489	0.3782	-1.40278	down
MW0146254	Asp-Ser-Gln-Lys	Asp-Ser-Gln-Lys	Amino acids and derivatives	氨基酸及其衍生物	Amino acids and derivatives	氨基酸及其衍生物	C18H32N6O9	3	0.6586	-	1711.87	1063.07	1818.02	1744.42	4261.03	5400.12	1.0422	0.165122	0.318676	2.48327	1.31224	up
MW0146054	Asp-Asp-His	Asp-Asp-His	Amino acids and derivatives	氨基酸及其衍生物	Amino acids and derivatives	氨基酸及其衍生物	C14H19N5O8	3	0.6567	-	40014.2	41181	41368.4	12034	12073.2	13426.9	1.415	1.49845e-06	0.00121786	0.306243	-1.70725	down
MW0153810	Methyl diacetoxy-8-gingerdiol	Methyl diacetoxy-8-gingerdiol	Others	其它类	Lactones	内酯类化合物	C24H38O6	3	0.6565	-	6426.36	5115.66	2949.47	8142.33	12664.8	10732.5	1.18813	0.0292027	0.0993074	2.17642	1.12196	up
MW0146226	Asp-Phe-Ser-Ala-Thr	Asp-Phe-Ser-Ala-Thr	Amino acids and derivatives	氨基酸及其衍生物	Amino acids and derivatives	氨基酸及其衍生物	C23H33N5O10	3	0.6559	-	3627.92	1209.11	1797.37	4738.12	6827.04	9561.17	1.20452	0.0543728	0.150319	3.18436	1.671	up
MW0152375	Leu-Ile-Glu-Glu	Leu-Ile-Glu-Glu	Amino acids and derivatives	氨基酸及其衍生物	Amino acids and derivatives	氨基酸及其衍生物	C22H38N4O9	3	0.655	-	234.12	532.25	302.62	2036.92	2726.9	2358.52	1.37104	0.00361284	0.028302	6.66268	2.7361	up
MW0144545	Ala-Gln-Phe-Ile-Met	Ala-Gln-Phe-Ile-Met	Amino acids and derivatives	氨基酸及其衍生物	Amino acids and derivatives	氨基酸及其衍生物	C28H44N6O7S	3	0.6467	-	4374.42	583.65	466.38	7676.12	24115.1	18631.5	1.21838	0.0813349	0.198962	9.29545	3.21652	up
MW0144635	Ala-Leu-Gly-Ile-Ser	Ala-Leu-Gly-Ile-Ser	Amino acids and derivatives	氨基酸及其衍生物	Amino acids and derivatives	氨基酸及其衍生物	C20H37N5O7	3	0.6427	-	3646.72	1164.02	6905.45	10419.8	20218.5	14676.5	1.15342	0.0377877	0.117783	3.8677	1.95148	up
MEDP1221	PC(O-16:0/O-1:0)	PC(O-16:0/O-1:0)	Lipids	脂质	LPC	溶血磷脂酰胆碱	C25H54NO6P	3	0.6421	-	20181.9	28547.9	17669.3	45775.4	52240.3	39031.1	1.29344	0.00997197	0.0503008	2.06399	1.04543	up
MW0148586	Diphenylphosphine isopropyl ester	Diphenylphosphine isopropyl ester	Others	其它类	Lactones	内酯类化合物	C20H25O3P	3	0.6408	-	38471.4	37937.5	36597	16263.3	14363.4	19545.2	1.38443	0.00220097	0.0222705	0.443976	-1.17145	down
MW0151482	Ile-Leu-Ala-Asp	Ile-Leu-Ala-Asp	Amino acids and derivatives	氨基酸及其衍生物	Amino acids and derivatives	氨基酸及其衍生物	C19H34N4O7	3	0.6405	-	2899.63	4646.87	2310.74	104.53	687.84	839.56	1.17903	0.0487472	0.139689	0.165556	-2.5946	down
MW0105471	Ala-Leu-Asp-Asp	Ala-Leu-Asp-Asp	Amino acids and derivatives	氨基酸及其衍生物	Amino acids and derivatives	氨基酸及其衍生物	C17H28N4O9	3	0.6396	-	2295.67	3160.56	9278.07	37414.6	40036.5	38727.1	1.32702	0.00187225	0.020088	7.88488	2.97909	up
MW0156931	Ser-Thr-Pro-Asp-Ala	Ser-Thr-Pro-Asp-Ala	Amino acids and derivatives	氨基酸及其衍生物	Amino acids and derivatives	氨基酸及其衍生物	C19H31N5O10	3	0.6251	-	20934.5	17844.1	9030.66	39953.7	29747.8	51860.5	1.20126	0.0409459	0.123886	2.54264	1.34633	up
MW0151217	HoPhe-Lys-OH	HoPhe-Lys-OH	Others	其它类	Lactones	内酯类化合物	C21H25N3O6	3	0.6106	-	4958.08	7743.6	4457.22	2701.47	1379.5	4408.24	1.02071	0.100026	0.228039	0.494741	-1.01525	down
MW0155857	Pro-Glu-Leu-Ala-Lys	Pro-Glu-Leu-Ala-Lys	Amino acids and derivatives	氨基酸及其衍生物	Amino acids and derivatives	氨基酸及其衍生物	C25H44N6O8	3	0.6091	-	36194	71549	71700	156231	153253	181411	1.29508	0.00283361	0.0256604	2.73566	1.45189	up
Hmln000873	2-O-Galloyl-D-glucose	2-O-没食子酰-D-葡萄糖	Phenolic acids	酚酸类	Phenolic acids	酚酸类	C13H16O10	3	0.6089	-	2377.79	3210.71	1965.7	6400.61	8361.76	7675.34	1.35975	0.00348051	0.0278893	2.97023	1.57057	up
MW0151493	Ile-Leu-Leu-Gly-Ala	Ile-Leu-Leu-Gly-Ala	Amino acids and derivatives	氨基酸及其衍生物	Amino acids and derivatives	氨基酸及其衍生物	C23H43N5O6	3	0.5949	-	465.19	303.84	4245.9	13.93	47.82	124.7	1.1626	0.337824	0.507399	0.037179	-4.74937	down
MW0151500	Ile-Leu-Tyr-Asp	Ile-Leu-Tyr-Asp	Amino acids and derivatives	氨基酸及其衍生物	Amino acids and derivatives	氨基酸及其衍生物	C25H38N4O8	3	0.5914	-	6142.69	12427.9	7719.69	45107.5	22759.4	24355.1	1.27728	0.0841254	0.20387	3.50784	1.81058	up
MW0156672	Ser-Asn-Val-Ser-Asp	Ser-Asn-Val-Ser-Asp	Amino acids and derivatives	氨基酸及其衍生物	Amino acids and derivatives	氨基酸及其衍生物	C19H32N6O11	3	0.5885	-	8574.03	10966.7	8716.9	20973.3	17267.7	18606.1	1.36597	0.00292138	0.0260866	2.01174	1.00845	up
MW0158715	TyrMe-Trp-OH	TyrMe-Trp-OH	Amino acids and derivatives	氨基酸及其衍生物	Amino acids and derivatives	氨基酸及其衍生物	C27H25N3O7	3	0.5866	-	5057.95	5722.9	5528.16	32408.1	32029.7	33240.6	1.41645	5.16788e-06	0.00144509	5.98923	2.58237	up
MW0153212	Lys-Val-Val-Ala-Gly	Lys-Val-Val-Ala-Gly	Amino acids and derivatives	氨基酸及其衍生物	Amino acids and derivatives	氨基酸及其衍生物	C21H40N6O6	3	0.5775	-	14311	27433.3	25839	57236.9	55730.3	58638.2	1.30286	0.0114004	0.0542249	2.53917	1.34436	up
MW0152347	Leu-Gly-Phe-Glu-Val	Leu-Gly-Phe-Glu-Val	Amino acids and derivatives	氨基酸及其衍生物	Amino acids and derivatives	氨基酸及其衍生物	C27H41N5O8	3	0.5736	-	1990.22	2153.52	2851.36	599.43	1218.72	508.98	1.26938	0.0115166	0.0546178	0.33268	-1.58779	down
MW0150845	His-Asn-Ala-Glu	组氨酸-天门冬酰氨-丙氨酸-谷氨酸	Amino acids and derivatives	氨基酸及其衍生物	Amino acids and derivatives	氨基酸及其衍生物	C18H27N7O8	3	0.5624	-	1852.41	2326.26	3364.33	8328.49	9887.13	8584.34	1.36491	0.000634995	0.0121077	3.55296	1.82902	up
MW0155972	Pro-Pro-Asp	Pro-Pro-Asp	Amino acids and derivatives	氨基酸及其衍生物	Amino acids and derivatives	氨基酸及其衍生物	C14H21N3O6	3	0.5519	-	9868.73	14668.4	14337.1	94263.2	84417.2	97972.6	1.40441	0.000853821	0.0136723	7.11662	2.83119	up
MW0193286	Acacetin-7-O-glucuronide	金合欢素-7-O-葡萄糖醛酸苷	Flavonoids	黄酮	Flavones	黄酮	C26H20O8	3	0.5462	-	5555.14	5835.09	1945.99	46802	36639.4	41755.2	1.35388	0.00215406	0.0219086	9.38772	3.23077	up
MW0062170	Prenyl arabinosyl-(1->6)-glucoside	异戊烯阿拉伯糖基-(1->6)-葡糖苷	FA	脂肪酰类	Others	其它	C16H28O10	2	0.8754	175737-84-5	2385.29	936.51	6034.8	11225.8	14673.9	9836.15	1.16687	0.0137008	0.0614761	3.81932	1.93331	up
MW0107553	Isobutyrylglycine	异丁酰甘氨酸	Amino acids and derivatives	氨基酸及其衍生物	Amino acids and derivatives	氨基酸及其衍生物	C6H11NO3	2	0.8714	15926-18-8	1.24554e+06	1.15821e+06	1.19032e+06	353302	340507	332287	1.41638	0.000493778	0.0105485	0.285497	-1.80845	down
MW0139819	5H-Benzocyclohepten-5-one, 1,8-bis((2R,3R)-3,5,7-trihydroxy-2H-1-benzopyran-2-yl)-3,4,6-trihydroxy-	茶黄素	Tannins	鞣质	Proanthocyanidins	原花青素	C29H24O12	2	0.8491	4670-05-7	8438.28	11502	6283.54	2582.37	4433.03	898.02	1.14176	0.0350965	0.111697	0.301764	-1.72851	down
MW0115006	GcNeu	N-甘氨酰神经氨酸	Organic acids	有机酸	Organic acids	有机酸	C11H19NO10	2	0.8402	1113-83-3	5694.34	4287.96	2643.87	1575.88	1960.32	2259.05	1.17913	0.116568	0.251052	0.458987	-1.12347	down
MW0112985	4,5-Dicaffeoylquinic acid	异绿原酸 C	Phenolic acids	酚酸类	Phenolic acids	酚酸类	C25H24O12	2	0.8392	57378-72-0	41570.8	41511.5	36413.3	18630.8	10392.6	15195.3	1.33996	0.00158272	0.0184755	0.370044	-1.43423	down
MW0053618	2-[4,5-dihydroxy-6-(hydroxymethyl)-2-[[12-hydroxy-4,4,8,10,14-pentamethyl-17-[6-methyl-2-[3,4,5-trihydroxy-6-[(3,4,5-trihydroxyoxan-2-yl)oxymethyl]oxan-2-yl]oxyhept-5-en-2-yl]-2,3,5,6,7,9,11,12,13,15,16,17-dodecahydro-1H-cyclopenta[a]phenanthren-3-yl]oxy]oxan-3-yl]oxy-6-(hydroxymethyl)oxane-3,4,5-triol	人参皂苷 Rb2	Terpenoids	萜类	Triterpene Saponin	三萜皂苷	C53H90O22	2	0.7786	11021-13-9	550.47	1101.92	844.31	2242.65	1255.72	2151.7	1.17823	0.059653	0.159939	2.26302	1.17825	up
MEDP0290	Sinapic acid	芥子酸	Phenolic acids	酚酸类	Phenolic acids	酚酸类	C11H12O5	2	0.7782	7362-37-0	9168.82	13610.4	12126.6	39832.1	19160.5	27305.6	1.2404	0.0981305	0.225457	2.47231	1.30586	up
MW0132813	3,8'-Biapigenin	3，8′-二芹菜素	Flavonoids	黄酮	Flavones	黄酮	C30H18O10	2	0.7734	101140-06-1	72574.5	84755.1	77838.4	43121.4	35119.2	33286.4	1.37809	0.000990011	0.014433	0.474244	-1.0763	down
MW0063674	Steviobioside	Steviobioside	Terpenoids	萜类	Terpene	萜类	C32H50O13	2	0.769	41093-60-1	596.91	1281.76	943.68	2423.95	1613.17	2056.57	1.20121	0.0247982	0.0893715	2.15908	1.11042	up
MW0000482	Leurocristine	Leurocristine	Alkaloids	生物碱	Alkaloids	生物碱	C46H56N4O10	2	0.7648	57-22-7 | 132142-73-5	3900.41	2371.18	3477.37	18921	13983.5	16988	1.3869	0.00686349	0.0405326	5.11773	2.35551	up
MW0110113	Tryptophylglycine	色氨酸-甘氨酸	Amino acids and derivatives	氨基酸及其衍生物	Amino acids and derivatives	氨基酸及其衍生物	C13H15N3O3	2	0.7577	7360-09-0	86.29	308.22	184.67	1041.91	521.94	691.3	1.22501	0.0514295	0.14476	3.89369	1.96114	up
MW0133376	4H-1-Benzopyran-4-one, 5,7-dihydroxy-2-(4-hydroxyphenyl)-3,6,8-trimethoxy-	4'，5,7-三羟基3,6,8-三甲氧基黄酮	Flavonoids	黄酮	Flavones	黄酮	C18H16O8	2	0.7577	57393-71-2	5081.28	4928.95	3850.67	12175.7	10589	13692.2	1.37948	0.00631832	0.0390426	2.6302	1.39517	up
MW0111951	2,3-Diphosphoglyceric acid	2,3-双磷酸甘油酯;格林瓦尔德酯	Others	其它类	Lactones	内酯类化合物	C3H8O10P2	2	0.7493	138-81-8	19898.8	3949.68	21151	376.42	1095.16	4041.36	1.12683	0.135562	0.278579	0.122511	-3.02901	down
MW0168272	Oxycanthine	氧刺棘碱	Lignans and Coumarins	木脂素和香豆素	Lignans	木脂素	C37H40N2O6	2	0.7473	548-40-3	4323.83	3701.36	2536.36	7189.04	7823.55	8669.15	1.31485	0.00337056	0.0276796	2.24226	1.16495	up
MEDL01762	Sakuranetin	5,4'-二羟基-7-甲氧基黄酮 (樱花素)	Flavonoids	黄酮	Flavanones	二氢黄酮	C16H14O5	2	0.7471	2957-21-3	81357.1	85227.7	75895.1	301912	337252	300242	1.4139	0.00179532	0.0196759	3.87416	1.95388	up
MEDN1475	D-Sorbitol-6-phosphate	山梨糖醇-6-磷酸	Others	其它类	Saccharides	糖类	C6H15O9P	2	0.7429	20479-58-7	14152	12513.6	11754.1	5241.75	5503.69	5163.63	1.40552	0.00776083	0.0433032	0.414087	-1.272	down
MW0150227	Glu-Arg	谷氨酸-精氨酸	Amino acids and derivatives	氨基酸及其衍生物	Amino acids and derivatives	氨基酸及其衍生物	C11H21N5O5	2	0.7364	7219-59-2	6686.72	10744.4	8024.31	24582.8	29148.4	18837	1.33532	0.0222104	0.0836686	2.85079	1.51136	up
MW0108032	Lys-Arg	Lys Arg	Amino acids and derivatives	氨基酸及其衍生物	Amino acids and derivatives	氨基酸及其衍生物	C12H26N6O3	2	0.7324	29586-66-1	8099.12	8510.3	7886.62	2060.18	1957.81	2345.21	1.41259	4.07017e-05	0.0033499	0.259764	-1.94472	down
MEDL02262	Trehalose-6-phosphate	海藻糖-6-磷酸	Others	其它类	Saccharides	糖类	C12H23O14P	2	0.716	4484-88-2	83537.3	80564.7	81321.6	325465	308906	304692	1.41697	0.000607742	0.0118516	3.8263	1.93595	up
MEDP0208	Succinic acid	琥珀酸	Organic acids	有机酸	Organic acids	有机酸	C4H6O4	3	0.9731	110-15-6	540859	573658	888194	223525	214889	216290	1.36293	0.0556115	0.152055	0.326909	-1.61304	down
MEDP0025	L-Tryptophan	L-色氨酸	Amino acids and derivatives	氨基酸及其衍生物	Amino acids and derivatives	氨基酸及其衍生物	C11H12N2O2	3	0.9563	73-22-3	367193	377168	359873	1.20433e+06	1.16594e+06	1.17357e+06	1.41719	2.22546e-05	0.00255827	3.20932	1.68227	up
MEDP0171	Inosine	肌苷	Nucleotides and derivatives	核苷酸及其衍生物	Nucleotides and derivatives	核苷酸及其衍生物	C10H12N4O5	3	0.9546	58-63-9	18678.8	18187.3	15409.2	6820.3	7866.54	4906.98	1.35568	0.00137271	0.0172638	0.37482	-1.41573	down
MEDN0469	Citraconic acid	柠康酸	Organic acids	有机酸	Organic acids	有机酸	C5H6O4	3	0.9469	498-23-7	44498.8	45421.7	43904	887419	853354	861721	1.4177	0.000151141	0.0057807	19.4471	4.28148	up
MEDN1144	alpha-Dimorphecolic acid	9(S)-HODE	Lipids	脂质	Free fatty acids	游离脂肪酸	C18H32O3	3	0.9308	73543-67-6	699.52	434.82	815.78	2230.16	1263.77	940.93	1.10655	0.157783	0.309369	2.27415	1.18533	up
MEDL02396	Sucrose	D-蔗糖	Others	其它类	Saccharides	糖类	C12H22O11	3	0.926	57-50-1	551638	641343	596890	1.38525e+06	1.22838e+06	1.43853e+06	1.40028	0.00270101	0.0249459	2.26394	1.17883	up
MEDN0724	Aspirin	乙酰水杨酸	Organic acids	有机酸	Organic acids	有机酸	C9H8O4	3	0.925	50-78-2	121622	123865	120449	65559.1	65575.7	43979.1	1.33636	0.0113696	0.0541577	0.478537	-1.0633	down
MEDL02773	Indoleacetaldehyde	吲哚-3-乙醛	Alkaloids	生物碱	Plumerane	吲哚类生物碱	C10H9NO	3	0.9016	2591-98-2	27801.8	27739.3	29617.4	139872	138059	137074	1.4172	1.27729e-07	0.000276831	4.87333	2.28491	up
MEDP1190	Adenylocuccinic Acid	腺苷酸基琥珀酸	Organic acids	有机酸	Organic acids	有机酸	C14H18N5O11P	3	0.8955	19046-78-7	24763.2	22422.5	31669.5	9225.76	7236.2	7273.93	1.3855	0.0177348	0.0725685	0.301006	-1.73214	down
MEDL00375	Oglufanide	谷氨酰色氨酸	Amino acids and derivatives	氨基酸及其衍生物	Amino acids and derivatives	氨基酸及其衍生物	C16H19N3O5	3	0.8931	38101-59-6	4040.46	5742.45	4197.77	22797.6	21250.4	24703.3	1.40224	0.000445498	0.0101281	4.91759	2.29795	up
MEDN0060	N-Isovaleroylglycine	N-异戊酰氨基乙酸	Amino acids and derivatives	氨基酸及其衍生物	Amino acids and derivatives	氨基酸及其衍生物	C7H13NO3	3	0.8889	16284-60-9	99707.3	109824	106680	9539.28	19797.6	20148.4	1.37217	4.94342e-05	0.00353838	0.156495	-2.67581	down
MEDN0493	4-Methoxycinnamic acid	4-甲氧基肉桂酸	Phenolic acids	酚酸类	Phenolic acids	酚酸类	C10H10O3	3	0.8877	943-89-5	1.67062e+06	1.90355e+06	1.86175e+06	739706	689293	751379	1.41002	0.00265014	0.0247921	0.401106	-1.31795	down
MEDL01835	Capsianoside II	辣椒萜苷 II	Terpenoids	萜类	Ditepenoids	二萜	C50H84O25	3	0.8536	121961-80-6	809.67	1557.66	639.38	1806.41	2842.2	1648.92	1.10537	0.0842936	0.204125	2.09449	1.0666	up
MW0105439	Adouetine X	蛇婆子碱 X	Amino acids and derivatives	氨基酸及其衍生物	Amino acids and derivatives	氨基酸及其衍生物	C28H44N4O4	3	0.8499	19542-37-1	16246.2	21212.1	17743.4	3489.13	3719.02	4731.8	1.40039	0.00715753	0.0414724	0.216297	-2.20892	down
MEDP0046	Hexanoylglycine	己酰-L-甘氨酸	Amino acids and derivatives	氨基酸及其衍生物	Amino acids and derivatives	氨基酸及其衍生物	C8H15NO3	3	0.8493	24003-67-6	284422	312168	296637	94103.9	89954.2	94853.5	1.41573	0.00110122	0.0153382	0.312252	-1.67922	down
MEDL00568	Hyperoside	槲皮素-3-O-半乳糖苷 (金丝桃苷)	Flavonoids	黄酮	Flavonols	黄酮醇	C21H20O12	3	0.8456	482-36-0	1119.28	821.6	768.43	1684.9	2059.47	2642.92	1.31288	0.0344548	0.11063	2.35753	1.23728	up
MW0149018	Estradiol-3-sulfate	雌二醇-17β-3-硫酸酯	Organic acids	有机酸	Organic acids	有机酸	C18H24O5S	3	0.8368	481-96-9	235.5	1962.79	1247.27	2469.78	4994.09	2783.55	1.00285	0.0851321	0.20528	2.97409	1.57245	up
MEDN0704	Oxalacetic acid	草酰乙酸	Organic acids	有机酸	Organic acids	有机酸	C4H4O5	3	0.8297	328-42-7	180907	181199	173008	93813	70531.9	85740.3	1.38393	0.00195452	0.0205972	0.46735	-1.09742	down
MEDL02143	Amentoflavone	穗花杉双黄酮	Flavonoids	黄酮	Biflavones	双黄酮	C30H18O10	3	0.8237	1617-53-4	5222.62	4956.46	3502.93	12740.2	12676.3	7698.71	1.27928	0.0495084	0.141	2.42035	1.27522	up
MEDL02759	2-Hydroxyglutarate	2-羟基戊二酸	Organic acids	有机酸	Organic acids	有机酸	C5H8O5	3	0.8108	2889-31-8	118289	124697	128041	1.82996e+06	1.76403e+06	1.76494e+06	1.41749	0.000136297	0.00548122	14.4435	3.85235	up
MEDL01834	Capsianoside I	辣椒萜苷 I	Terpenoids	萜类	Ditepenoids	二萜	C32H52O14	3	0.8035	121924-04-7	815.95	1085.74	799.03	3903.65	2466.33	3278.5	1.37107	0.0261092	0.0924114	3.57256	1.83696	up
MW0138003	Diosmin	香叶木苷	Flavonoids	黄酮	Flavones	黄酮	C28H32O15	3	0.792	520-27-4	10437.3	7305.78	14247.6	20300	24299	20534.9	1.24655	0.0141922	0.0628595	2.03602	1.02575	up
MEDP1614	Isopentenyl pyrophosphate	异戊烯焦磷酸	Organic acids	有机酸	Organic acids	有机酸	C5H12O7P2	3	0.7811	358-71-4	1205.42	1524.07	490.39	10348	10139.5	10295.3	1.36096	0.000731769	0.0127173	9.56024	3.25705	up
MEDP2093	4'-Hydroxyflavone	4'-羟基黄酮	Flavonoids	黄酮	Flavones	黄酮	C15H10O3	3	0.7767	4143-63-9	109914	133057	153268	146257	380511	308041	1.05326	0.16547	0.319057	2.10683	1.07507	up
MW0000229	Dihydroberberine	二氢小檗碱	Benzene and substituted derivatives	苯及其衍生物	Benzene and substituted derivatives	苯及其衍生物	C20H19NO4	3	0.7761	120834-89-1	15586	16423.4	13829.6	4104.56	4436.65	4580.99	1.41114	0.0038525	0.0292287	0.286267	-1.80457	down
MEDN0226	Erythrono-1,4-lactone	D-赤藓酸-内酯	Others	其它类	Lactones	内酯类化合物	C4H6O4	3	0.771	17675-99-9	120315	145325	151796	77749.4	18847.1	79269.2	1.04283	0.038006	0.118124	0.4213	-1.24708	down
MW0113261	5-O-Methylembelin	5-O-甲基香豆素	Others	其它类	Ketone compounds	酮类化合物	C18H28O4	3	0.7707	56005-10-8	1763.64	3237.49	1341.55	4493.89	5696.82	4422.9	1.2118	0.0211334	0.0808154	2.30401	1.20415	up
MEDL00369	Glutamyl-phenylalanine	谷氨酰苯丙氨酸	Amino acids and derivatives	氨基酸及其衍生物	Amino acids and derivatives	氨基酸及其衍生物	C14H18N2O5	3	0.7681	20556-22-3	207865	217775	234377	473787	424364	486084	1.40254	0.00226449	0.0225478	2.09727	1.06851	up
MEDP0232	N-Acetyl-D-glucosamine	N-乙酰-D-葡萄糖胺	Alcohol and amines	醇、胺类	Amines	胺类	C8H15NO6	3	0.7665	7512-17-6	6235.83	5189.77	5656.61	15102.6	13133.7	15436.7	1.40076	0.00238637	0.0233516	2.55664	1.35425	up
MEDN0482	Valeric acid	正戊酸	Organic acids	有机酸	Organic acids	有机酸	C5H10O2	3	0.7606	109-52-4	26236.7	25847.6	36998.2	12569.1	12639.6	16707.7	1.31625	0.037035	0.116049	0.470535	-1.08763	down
MEDN0038	Oxiglutatione	氧化型谷胱甘肽	Amino acids and derivatives	氨基酸及其衍生物	Amino acids and derivatives	氨基酸及其衍生物	C20H32N6O12S2	3	0.7523	27025-41-8	22181	19673.6	19032.6	3725.21	2716.29	9804.2	1.25452	0.011275	0.0539114	0.266817	-1.90608	down
MW0007606	Methadyl acetate	乙酸甲酯	Benzene and substituted derivatives	苯及其衍生物	Benzene and substituted derivatives	苯及其衍生物	C23H31NO2	3	0.7521	509-74-0	6452.51	8560.22	7591.27	547.7	501.9	333.76	1.40709	0.00683235	0.0404589	0.0611998	-4.03033	down
MW0129998	5,7,2',4'-Tetrahydroxy-3-geranylflavone	5，7，2'，4'-四羟基-3-香叶基黄酮	Flavonoids	黄酮	Flavones	黄酮	C25H26O6	3	0.7503	376361-87-4	165474	190638	184948	387048	399241	386370	1.40855	0.000121517	0.00503251	2.16733	1.11592	up
MEDN0074	gamma-Glutamylcysteine	γ-L-谷氨酸-L-半胱氨酸	Amino acids and derivatives	氨基酸及其衍生物	Amino acids and derivatives	氨基酸及其衍生物	C8H14N2O5S	3	0.7461	636-58-8	1349.91	1556.01	2419.76	4250.03	5934.89	4475.07	1.31853	0.0118016	0.0556796	2.7527	1.46085	up
MW0113145	4-O-Methylgalactinol	4-O-甲基半乳糖醇	Others	其它类	Saccharides	糖类	C13H24O11	3	0.7414	75589-40-1	21659.2	26380.1	29592.5	17422.6	6082.66	7659.06	1.18566	0.0280272	0.0965728	0.401437	-1.31675	down
MW0112923	3'-Sialyl-3-fucosyllactose	3'-Sialyl-3-岩藻糖基乳糖	Others	其它类	Saccharides	糖类	C29H49NO23	3	0.7396	122560-33-2	6865.88	16445.9	26832.4	59804.7	63625.7	64534.4	1.2444	0.0115392	0.0546848	3.74849	1.90631	up
MEDN0627	Ellagic acid	鞣花酸	Tannins	鞣质	Tannin	鞣质	C14H6O8	3	0.7333	476-66-4	20928	25552.1	30109.7	56722.8	67642.5	70454.8	1.37039	0.00265866	0.0248014	2.54368	1.34692	up
MEDL02353	Rosmarinic acid	迷迭香酸	Phenolic acids	酚酸类	Phenolic acids	酚酸类	C18H16O8	3	0.7309	20283-92-5	4903.77	5960.07	6907.42	15808.5	15883.6	14820.6	1.38753	0.000487143	0.0105485	2.6173	1.38808	up
MEDL02666	Icaritin	淫羊藿黄素	Flavonoids	黄酮	Flavonols	黄酮醇	C21H20O6	3	0.7301	118525-40-9	61516.4	78275.6	61118.9	27160.8	23552.2	28791.7	1.38518	0.0139347	0.0621849	0.395721	-1.33744	down
MW0103535	2',3'-Dideoxyinosine	2',3'-二脱氧肌苷	Nucleotides and derivatives	核苷酸及其衍生物	Nucleotides and derivatives	核苷酸及其衍生物	C10H12N4O3	3	0.7274	69655-05-6	36167.6	35253.1	34013.2	8415.21	12836.6	17413.3	1.31432	0.0100891	0.0505776	0.366724	-1.44724	down
MEDL02585	Veranisatin B	八角莽草毒素 B	Terpenoids	萜类	Sesquiterpenoids	倍半萜	C16H20O9	3	0.7169	153445-93-3	694368	718280	711756	1.61768e+06	1.62069e+06	1.58717e+06	1.41716	1.30631e-06	0.00121786	2.27148	1.18364	up
MW0112238	2-O-(4-O-Methyl-a-D-glucopyranuronosyl)-D-xylose	2-O-(4-O-Methyl-a-D-glucopyranuronosyl)-D-xylose	Others	其它类	Saccharides	糖类	C12H20O11	3	0.7161	7382-52-7	5407.95	5079.05	4487.7	3393.34	998.2	2672.19	1.07029	0.0511526	0.144042	0.471711	-1.08402	down
MW0009241	Octyl gallate	没食子酸辛酯	Phenolic acids	酚酸类	Phenolic acids	酚酸类	C15H22O5	3	0.7155	1034-01-1	41004.8	34006.4	34278	77227	77140	78691.5	1.39976	0.00210444	0.02168	2.13249	1.09254	up
MEDN0036	L-Alanyl-L-alanine	D-丙氨酰-D-丙氨酸	Amino acids and derivatives	氨基酸及其衍生物	Amino acids and derivatives	氨基酸及其衍生物	C6H12N2O3	3	0.7103	1948-31-8	1372.09	1471.98	1192.34	8055.25	10308.3	9921.94	1.41063	0.00672312	0.0401412	7.0076	2.80892	up
MW0000487	Voacamine	沃阿卡明	Alkaloids	生物碱	Alkaloids	生物碱	C43H52N4O5	3	0.7094	3371-85-5	6956.06	5141.57	8413.62	32276.3	35526.6	34063.9	1.39528	3.45644e-05	0.00315037	4.96639	2.3122	up
MW0139010	Mulberrofuran A	桑呋喃A	Heterocyclic compounds	杂环化合物	Heterocyclic compounds	杂环化合物	C25H28O4	3	0.7077	68978-04-1	2370.47	1749.34	928.53	16335.2	14543.9	16027.5	1.37812	6.18244e-05	0.00398002	9.29147	3.21591	up
MW0052504	Ecabet	埃卡贝特	Organic acids	有机酸	Organic acids	有机酸	C20H28O5S	3	0.7056	86408-72-2	736.23	584.25	316.77	164.3	118.7	374.41	1.06951	0.100096	0.228118	0.401533	-1.31641	down
MW0108775	N-Feruloylglycyl-L-phenylalanine	N-阿魏酰甘氨酰-L-苯丙氨酸	Amino acids and derivatives	氨基酸及其衍生物	Amino acids and derivatives	氨基酸及其衍生物	C21H22N2O6	3	0.7032	40747-82-8	100318	66465.1	61304.2	32461.2	34474.9	28291.9	1.32359	0.0655845	0.171671	0.417507	-1.26013	down
MW0009360	Pentoxifylline	己酮可可碱	Alkaloids	生物碱	Alkaloids	生物碱	C13H18N4O3	3	0.7007	6493-05-6	95210.1	98052	84272.7	42504.4	41048.5	43301.3	1.40672	0.00593026	0.0376549	0.457075	-1.1295	down
MEDN0029	4-Hydroxyphenylpyruvic acid	4-羟基苯基丙酮酸	Benzene and substituted derivatives	苯及其衍生物	Benzene and substituted derivatives	苯及其衍生物	C9H8O4	3	0.697	156-39-8	130.11	180.67	116.28	945.06	1793.47	1722.27	1.3872	0.0378858	0.117899	10.4454	3.38479	up
MW0133884	Hydroxydihydrosterigmatocystin	羟基二氢鬼菌素	Others	其它类	Others	其它	C18H14O7	3	0.6887	109278-36-6 | 63324-97-0	3020.07	2954.56	2558.26	7366.07	7438.35	4230.98	1.2679	0.0777703	0.193075	2.23083	1.15758	up
MEDP0878	N-methyl-L-glutamic Acid	N-甲基-L-谷氨酸	Amino acids and derivatives	氨基酸及其衍生物	Amino acids and derivatives	氨基酸及其衍生物	C6H11NO4	3	0.6828	35989-16-3	15864.6	15421.6	18239.5	94456.8	88100.1	96941.6	1.41441	0.000419789	0.00982709	5.64351	2.49659	up
MW0137432	kaempferol 3-O-beta-D-galactopyranosyl-7-O-alpha-L-rhamnopyranoside	山奈酚3-O-BETA-D-吡喃半乳糖-7-O-ALPHA-L-吡喃鼠李糖苷	Flavonoids	黄酮	Flavonols	黄酮醇	C27H30O15	3	0.6824	38784-79-1	14677.5	23383.8	13391.6	39704.3	44022.4	62841.7	1.3076	0.0312249	0.104008	2.8486	1.51025	up
MEDL02240	Rhein	大黄酸	Quinones	醌类	Anthraquinone	蒽醌	C15H8O6	3	0.6819	478-43-3	1183.79	1867.93	608.55	3910.04	3679.36	3097.58	1.23161	0.00861718	0.0461523	2.91972	1.54583	up
MW0112914	Malonic semialdehyde	丙二酸半醛	Organic acids	有机酸	Organic acids	有机酸	C3H4O3	3	0.6785	926-61-4	17709.3	133340	201962	827645	567827	973956	1.17647	0.0169211	0.0701665	6.71205	2.74675	up
MEDL02595	3,3',4',5,6,7,8-Heptamethoxyflavone	3,5,6,7,8,3',4'-七甲氧基黄酮	Flavonoids	黄酮	Flavonols	黄酮醇	C22H24O9	3	0.6772	1178-24-1	59048.4	54202.2	58481.4	7446.7	9841.6	10668.3	1.40718	4.90266e-05	0.00353838	0.162792	-2.6189	down
MW0105541	Alanyl-Hydroxyproline	丙氨酰-羟脯氨酸	Amino acids and derivatives	氨基酸及其衍生物	Amino acids and derivatives	氨基酸及其衍生物	C8H14N2O4	3	0.672	76400-25-4	2108.84	3551.28	4258.84	5929.39	7042.24	7815.99	1.22504	0.0129102	0.0589481	2.09575	1.06746	up
MW0134066	Homoeriodictyol (+/-)-	5，7-二羟基-2-(4-羟基-3-甲氧基苯基)-3，4-二氢-2H-1-苯并吡喃-4-酮	Benzene and substituted derivatives	苯及其衍生物	Benzene and substituted derivatives	苯及其衍生物	C16H14O6	3	0.671	107657-60-3 | 69097-98-9	39109.9	9395.56	22838.9	67436.1	208870	107763	1.20997	0.126253	0.264701	5.38331	2.42849	up
FDATN01055	Midodrine	米多君	Benzene and substituted derivatives	苯及其衍生物	Benzene and substituted derivatives	苯及其衍生物	C12H18N2O4	3	0.6673	133163-28-7	1474.57	2543.74	3476.29	3911.35	9108.6	4415.92	1.06602	0.174002	0.329459	2.32646	1.21813	up
MW0005969	Acrivastine	阿伐斯汀	Benzene and substituted derivatives	苯及其衍生物	Benzene and substituted derivatives	苯及其衍生物	C22H24N2O2	3	0.6598	87848-99-5	194556	216968	220337	90509.6	86758.6	92243.3	1.41065	0.00335944	0.0276796	0.426536	-1.22926	down
MW0138125	(E)-Ethyl 3-(4-hydroxyphenyl)acrylate	对-香豆酸乙酯	Others	其它类	Lactones	内酯类化合物	C11H12O3	3	0.6543	7362-39-2 | 2979-06-8	3474.57	6453.81	4262.38	12287	7961.81	11082.4	1.23982	0.0267204	0.0934064	2.20786	1.14265	up
MW0015609	Albendazole	阿苯达唑	Benzene and substituted derivatives	苯及其衍生物	Benzene and substituted derivatives	苯及其衍生物	C12H15N3O2S	3	0.6533	54965-21-8	3756.84	422.59	131.39	12018.9	17514.7	12585.6	1.20089	0.00594242	0.0376589	9.77056	3.28844	up
MW0151689	Ile-Trp	异亮氨酰-色氨酸	Amino acids and derivatives	氨基酸及其衍生物	Amino acids and derivatives	氨基酸及其衍生物	C17H23N3O3	3	0.653	13589-06-5	2422.24	3479.99	3321.33	18018	16374.5	15912.6	1.40392	0.000320471	0.00841681	5.45398	2.44731	up
MW0106148	Chorismic acid	分支酸	Organic acids	有机酸	Organic acids	有机酸	C10H10O6	3	0.65	617-12-9	63020.7	61786.6	61502.1	337509	310776	331989	1.41705	0.000915168	0.0140608	5.26154	2.39548	up
MW0000423	Rescinnamine	利血胺	Alkaloids	生物碱	Alkaloids	生物碱	C35H42N2O9	3	0.6481	24815-24-5	1193.81	1132.8	1011.99	1691.19	2534.13	4293.94	1.19794	0.152471	0.30197	2.55175	1.35148	up
MW0001776	2-(2-Carboxyacetamido)benzoic acid	2-(丙二酰氨基）苯甲酸	Benzene and substituted derivatives	苯及其衍生物	Benzene and substituted derivatives	苯及其衍生物	C10H9NO5	3	0.6463	53947-84-5	48804.1	26706.6	9614.66	68228.2	82830.8	66198.7	1.08266	0.0428551	0.127824	2.55221	1.35175	up
MW0119658	3-Isomangostin	3-异倒捻子素	Flavonoids	黄酮	Other Flavonoids	其它类黄酮	C24H26O6	3	0.6462	19275-46-8	4513.07	5872.47	6330.69	25950.6	22429.3	25684.2	1.40176	0.000766004	0.0129305	4.43067	2.14753	up
MW0147022	6-(3,3-Dimethylallyl)-1,5-dihydroxyxanthone	胡桐素B；6-(3，3-二甲基烯丙基)-1，5-二羟基口山酮	Flavonoids	黄酮	Other Flavonoids	其它类黄酮	C18H16O4	3	0.6379	17623-60-8	102410	111341	111217	26276.2	28369.2	18878.5	1.3975	3.48857e-05	0.00315037	0.22625	-2.14401	down
MW0103525	Deoxyuridine-5'-diphosphate	脱氧尿苷-5'-二磷酸	Nucleotides and derivatives	核苷酸及其衍生物	Nucleotides and derivatives	核苷酸及其衍生物	C9H14N2O11P2	3	0.6345	4208-67-7	21904.2	5283.01	25828.6	49238.9	38399.5	47076.6	1.05319	0.0309049	0.103326	2.54104	1.34542	up
MW0006688	Cyperine	莎草碱	Benzene and substituted derivatives	苯及其衍生物	Benzene and substituted derivatives	苯及其衍生物	C15H16O4	3	0.633	33716-82-4	13108	14213	13430	29896.2	29699.3	28971.8	1.41466	4.07067e-06	0.00144509	2.17338	1.11994	up
MEDL02145	Procyanidin B1	原花青素 B1	Tannins	鞣质	Proanthocyanidins	原花青素	C30H26O12	3	0.6207	20315-25-7	8429.22	8911.4	6691.54	2909.75	1710.08	1708.82	1.3613	0.0036484	0.0284027	0.263341	-1.925	down
MW0152804	Lucumin	路枯马木苷	Benzene and substituted derivatives	苯及其衍生物	Benzene and substituted derivatives	苯及其衍生物	C19H25NO10	3	0.609	1392-28-5	34413.1	34526.7	33953.1	10069	10908.5	12239.1	1.41072	0.000330545	0.00855783	0.322827	-1.63117	down
MW0157362	Taxiphyllin	紫杉生氰糖苷	Benzene and substituted derivatives	苯及其衍生物	Benzene and substituted derivatives	苯及其衍生物	C14H17NO7	3	0.6086	21401-21-8	93773.3	68999.2	77177.5	174729	227409	209791	1.37458	0.00646535	0.0394451	2.55024	1.35063	up
MW0149874	Glutaminyl-arginine	谷氨酰胺酰-精氨酸	Amino acids and derivatives	氨基酸及其衍生物	Amino acids and derivatives	氨基酸及其衍生物	C11H22N6O4	3	0.6053	126590-89-4	18641.5	21325.2	10211.1	45017.4	34140.1	41559.4	1.25583	0.00716382	0.0414724	2.40578	1.26651	up
MEDN1516	6-Hydroxyflavone	6-羟基黄酮	Flavonoids	黄酮	Flavones	黄酮	C15H10O3	3	0.5975	6665-83-4	111629	120024	104653	41307.6	39687.8	36349.3	1.41012	0.00171101	0.0193478	0.348922	-1.51902	down
MEDP0823	L-3-Phenyllactic acid	L-3-苯乳酸	Organic acids	有机酸	Organic acids	有机酸	C9H10O3	3	0.5939	20312-36-1	230.64	334.46	495.85	10345.2	12564.5	11534.1	1.40597	0.00295213	0.0260866	32.465	5.02081	up
MW0011760	[6]-Gingerdiol 3,5-diacetate	[6]-姜二醇3，5-二乙酸酯	Others	其它类	Lactones	内酯类化合物	C21H32O6	3	0.5883	195204-05-8	2115.58	162.12	1474.46	9091.63	11968.2	6157.39	1.16754	0.032207	0.105977	7.25375	2.85873	up
MW0061627	Physalin D	Physalin D	Steroids	甾体	Steroid	甾体	C28H32O11	3	0.5795	54980-22-2	257490	291377	281932	77010	57487.2	85938.7	1.39368	0.000125723	0.00517373	0.26533	-1.91414	down
MW0130180	6,7,3',4'-Tetrahydroxyflavone	2-(3，4-二羟基苯基)-6，7-二羟基-4H-苯并吡喃-4-酮	Flavonoids	黄酮	Flavones	黄酮	C15H10O6	3	0.574	92915-82-7	6072.72	7698.18	7108.65	362.44	627.76	270.31	1.39545	0.00372408	0.0286896	0.0603706	-4.05001	down
MW0103302	(S)-5'-Deoxy-5'-(methylsulfinyl)adenosine	(S)-5'-脱氧-5'-(甲基亚磺酰基)腺苷	Nucleotides and derivatives	核苷酸及其衍生物	Nucleotides and derivatives	核苷酸及其衍生物	C11H15N5O4S	3	0.5738	897-42-7	677.45	426.91	638.36	4096.4	2341.7	5053.02	1.36058	0.0535637	0.14877	6.59378	2.72111	up
MW0114042	Casimiroedine	卡西定	Heterocyclic compounds	杂环化合物	Heterocyclic compounds	杂环化合物	C21H27N3O6	3	0.5681	5853-02-1	12869.2	18102.8	14348.8	51908.8	45238	45361.9	1.39246	0.000494111	0.0105485	3.14445	1.65281	up
MW0103678	trans-Zeatin-O-glucoside riboside	反式玉米素-O-葡萄糖苷核苷	Nucleotides and derivatives	核苷酸及其衍生物	Nucleotides and derivatives	核苷酸及其衍生物	C21H31N5O10	3	0.5544	62512-97-4	6669.81	14074.9	19756.3	3475.93	4848.31	7824.21	1.05281	0.15551	0.306681	0.398717	-1.32656	down
MW0114185	De-O-methylsimmondsin	去-O-甲基西蒙新素	Others	其它类	Saccharides	糖类	C15H23NO9	3	0.5272	135105-75-8	2047.84	3074.24	1669.12	3457.48	10636.8	4529.12	1.09026	0.216826	0.379489	2.74228	1.45537	up
MW0130772	(R)-2-Feruloyl-1-(4-Hydroxyphenyl)-1,2-ethanediol	(R)-2-阿魏酰-1-(4-羟基苯基)-1,2-乙二醇	Others	其它类	Lactones	内酯类化合物	C18H18O6	3	0.5252	177795-29-8	54313.9	45783.8	69004.7	34516.8	5024.71	22890	1.02714	0.0337654	0.109257	0.369193	-1.43755	down
MW0112177	2-Hydroxypentyl glucosinolate	2-羟基戊基硫代葡萄糖苷	Others	其它类	Lactones	内酯类化合物	C12H23NO10S2	3	0.5087	76265-23-1	3124.49	8018.11	2354.08	10434.5	11298.9	7369.92	1.0665	0.080736	0.197794	2.15633	1.10858	up
MW0138672	Kaempferol3-rhamninoside	山柰酚3-鼠李糖苷	Flavonoids	黄酮	Flavones	黄酮	C33H40O19	2	0.9105	-	2336.88	1694.04	2351.33	572.04	1357.16	344.99	1.16078	0.026177	0.0924753	0.35633	-1.48871	down
MW0122491	7-Hydroxymethotrexate	7-羟甲氨蝶呤	Heterocyclic compounds	杂环化合物	Heterocyclic compounds	杂环化合物	C20H22N8O6	2	0.7542	-	4485.82	8732.11	7238.26	19600.4	19859.5	21642	1.33584	0.00235784	0.0231932	2.98696	1.57868	up
MW0109201	Phenylalanylcysteine	Phe Cys	Amino acids and derivatives	氨基酸及其衍生物	Amino acids and derivatives	氨基酸及其衍生物	C12H16N2O3S	2	0.7269	-	746.79	2753.8	1139.56	7735.29	7884.5	5344.5	1.27213	0.00755227	0.042737	4.51802	2.17569	up
MW0134841	6-(2-{2,6-dihydroxy-4-[6-hydroxy-7-(3-methylbut-2-en-1-yl)-1-benzofuran-2-yl]phenyl}-6-(2,4-dihydroxyphenyl)-4-methylcyclohex-3-ene-1-carbonyloxy)-3,4,5-trihydroxyoxane-2-carboxylic acid	6-(2-{2，6-二羟基-4-[6-羟基-7-(3-甲基丁-2-烯-1-基)-1-苯并呋喃-2-基]苯基}-6-(2，4-二羟基苯基)-4-甲基环己-3-烯-1-羰氧基)-3，4，5-三羟基恶烷-2-羧酸	Organic acids	有机酸	Organic acids	有机酸	C39H40O14	3	0.9934	-	4819.19	6348.71	5072.04	3061.31	1561	1763.3	1.2877	0.00790712	0.0437545	0.393204	-1.34665	down
MW0135502	6-[4-({[2-(3,4-dihydroxyphenyl)-5,7-dihydroxy-3,4-dihydro-2H-1-benzopyran-3-yl]oxy}carbonyl)-2,6-dihydroxyphenoxy]-3,4,5-trihydroxyoxane-2-carboxylic acid	6-[4-({[2-(3，4-二羟基苯基)-5，7-二羟基-3，4-二氢-2H-1-苯并吡喃-3-基]氧基}羰基)-2，6-二羟基苯氧基]-3，4，5-三羟基恶烷-2-羧酸	Organic acids	有机酸	Organic acids	有机酸	C28H26O16	3	0.9643	-	20454.2	18815.1	21908.7	1018.29	277.52	2858.5	1.29881	0.000100551	0.0045602	0.0679054	-3.88033	down
MW0115883	(3b,6b,8a,12a)-8,12-Epoxy-7(11)-eremophilene-6,8,12-trimethoxy-3-ol	(3b,6b,8a,12a)-8,12-Epoxy-7(11)-eremophilene-6,8,12-trimethoxy-3-ol	Heterocyclic compounds	杂环化合物	Heterocyclic compounds	杂环化合物	C18H30O5	3	0.9237	-	60.39	17.5	18.2	202	332.37	50.41	1.10391	0.180352	0.336484	6.08575	2.60544	up
MW0007773	Phthalic acid, methyl neopentyl ester	Methyl neopentyl phthalic acid	Benzene and substituted derivatives	苯及其衍生物	Benzene and substituted derivatives	苯及其衍生物	C14H18O4	3	0.8657	-	9570.91	8244.15	7911.63	37352.2	30377.6	33905.8	1.40753	0.00421068	0.0307271	3.95059	1.98207	up
MW0000685	(3-Phenylpropoxy)sulfonic acid	（3-苯丙氧基）磺酸	Benzene and substituted derivatives	苯及其衍生物	Benzene and substituted derivatives	苯及其衍生物	C9H12O4S	3	0.8282	-	7245.49	14748.8	14829.5	6409.51	4267.82	4810.74	1.19296	0.0975229	0.224781	0.4206	-1.24948	down
MW0134075	CID 14730445	5，7-二羟基-2-(4-羟基-3-甲氧基苯基)-6，8-双[3，4，5-三羟基-6-(羟甲基）恶烷-2-基]-4H-苯并吡喃-4-酮	Others	其它类	Ketone compounds	酮类化合物	C28H32O16	3	0.8185	-	4561.43	3984.6	2038.09	6541.22	15334.9	12342.2	1.21071	0.0823999	0.201075	3.23299	1.69287	up
MW0130246	2-(3-hydroxyphenyl)-4-[3,5,7-trihydroxy-2-(4-hydroxy-3-methoxyphenyl)-3,4-dihydro-2H-1-benzopyran-8-yl]-8-[3,4,5-trihydroxy-6-(hydroxymethyl)oxan-2-yl]-3,4-dihydro-2H-1-benzopyran-3,5,7-triol	2-(3-羟基苯基)-4-[3，5，7-三羟基-2-(4-羟基-3-甲氧基苯基)-3，4-二氢-2H-1-苯并吡喃-8-基]-8-[3，4，5-三羟基-6-(羟甲基）恶烷-2-基]-3，4-二氢-2H-1-苯并吡喃-3，5，7-三醇	Benzene and substituted derivatives	苯及其衍生物	Benzene and substituted derivatives	苯及其衍生物	C37H38O16	3	0.8151	-	24600.8	8303.5	28911.9	58530.2	51296.3	48136.2	1.13794	0.0208246	0.0801667	2.55536	1.35353	up
MW0055628	PA(16:0/22:4(7Z,10Z,13Z,16Z))	PA(16:0/22:4(7Z,10Z,13Z,16Z))	GP	甘油磷脂类	PA	磷脂酸	C41H73O8P	3	0.815	-	15754.4	25107	15747.8	14403.7	4456.08	7011.47	1.07686	0.0765891	0.190871	0.457015	-1.12969	down
MW0134167	5,7-dihydroxy-6,8-bis[3,4,5-trihydroxy-6-(hydroxymethyl)oxan-2-yl]-2-(2,4,5-trihydroxyphenyl)-4H-chromen-4-one	5，7-二羟基-6，8-双[3，4，5-三羟基-6-(羟甲基）恶烷-2-基]-2-(2，4，5-三羟基苯基)-4H-苯并吡喃-4-酮	Others	其它类	Ketone compounds	酮类化合物	C27H30O17	3	0.8138	-	359.06	16866.7	630.66	123.81	165.2	122.46	1.00959	0.398275	0.563841	0.0230432	-5.43951	down
MEDL01893	9-Oxo-nonanoic acid	9-氧代壬酸	Organic acids	有机酸	Organic acids	有机酸	C9H16O3	3	0.812	-	11648	10249.9	13067.8	2405.83	8554.15	1852.2	1.12173	0.0606865	0.16218	0.366421	-1.44842	down
MW0117331	2-(1,3-dihydroxy-4-oxocyclohexyl)-5-hydroxy-3,6,7-trimethoxy-4H-chromen-4-one	2-(1，3-二羟基-4-氧代环己基)-5-羟基-3，6，7-三甲氧基-4H-苯并吡喃-4-酮	Others	其它类	Ketone compounds	酮类化合物	C18H20O9	3	0.8051	-	13477.8	14118	23083.9	4552.03	2951.22	1972.62	1.33906	0.04087	0.123886	0.186976	-2.41908	down
MW0127776	1,7-Bis(4-hydroxyphenyl)-1-heptene-3,5-dione	（1E)-1,7-双（4-羟基苯基）庚-1-烯-3,5-二酮	Others	其它类	Ketone compounds	酮类化合物	C19H18O4	3	0.7971	-	313363	195119	249934	679957	568416	640662	1.35198	0.00135213	0.0171041	2.49077	1.31659	up
MW0127629	({1-[2-(2,4-dihydroxyphenyl)-5,7-dihydroxy-6-(3-methylbut-2-en-1-yl)-4-oxo-3,4-dihydro-2H-1-benzopyran-3-yl]-3,7-dimethylocta-2,6-dien-4-yl}oxy)sulfonic acid	6-{[2-(2，4-二羟基苯基)-5-羟基-3-[4-羟基-3-(4-甲基戊-3-烯-1-基）丁-2-烯-1-基]-6-(3-甲基丁-2-烯基)-4-氧代-3，4-二氢-2H-1-苯并吡喃-7-基]氧基}-3，4，5-三羟基恶烷-2-羧酸	Organic acids	有机酸	Organic acids	有机酸	C30H36O10S	3	0.7931	-	5223.72	9703.56	5269.72	25249.3	24926.1	23883.4	1.35569	0.00424668	0.0309081	3.66682	1.87453	up
MEDL02225	DL-Arabinose	DL-阿拉伯糖	Others	其它类	Saccharides	糖类	C5H10O5	3	0.7909	-	207704	199069	210101	688189	695565	677936	1.41715	9.67034e-07	0.00121786	3.34216	1.74078	up
MW0109003	Opiorphin	鸦片啡	Alcohol and amines	醇、胺类	Polyamines	多胺	C29H48N12O8	3	0.7647	-	78546.1	80462.3	77481	170819	157126	173746	1.41229	0.0026736	0.0249051	2.12141	1.08502	up
MW0134820	6-(2,4-dihydroxyphenyl)-2-{3-[(2E)-3-(2,4-dihydroxyphenyl)prop-2-enoyl]-2,6-dihydroxyphenyl}-4-methylcyclohex-3-ene-1-carboxylic acid	6-(2，4-二羟基苯基)-2-{3-[（2E)-3-(2，4-二羟基苯基）丙-2-烯酰基]-2，6-二羟基苯基}-4-甲基环己-3-烯-1-羧酸	Organic acids	有机酸	Organic acids	有机酸	C29H26O9	3	0.7647	-	3384.43	3716.92	7022.04	13978.9	18224.8	13976.6	1.3167	0.0048245	0.0331715	3.26978	1.70919	up
MW0127644	({2-[(10-{[2,2-dimethyl-7,10-bis(2-methylbut-3-en-2-yl)-8-oxo-2H,8H-pyrano[3,2-g]chromen-5-yl]oxy}-2,2-dimethyl-7-(2-methylbut-3-en-2-yl)-8-oxo-2H,8H-pyrano[3,2-g]chromen-5-yl)oxy]-2-methylbut-3-en-1-yl}oxy)sulfonic acid	（{2-[（10-{[2，2-二甲基-7，10-双（2-甲基丁-3-烯-2-基)-8-氧代-2H，8H-吡喃并[3，2-g]苯并吡喃-5-基]氧基}-2，2-二甲基-7-(2-甲基丁-3-烯-2-基)-8-氧代-2H，8H-吡喃并[3，2-g]苯并吡喃-5-基）氧基]-2-甲基丁-3	Organic acids	有机酸	Organic acids	有机酸	C48H54O12S	3	0.7547	-	98.22	115.05	133.6	1256.35	1599.56	346.51	1.28213	0.125696	0.264063	9.23233	3.2067	up
MW0129359	{5-hydroxy-6-[3-(4-hydroxyphenyl)prop-2-enoyl]-7-methoxy-2,2-dimethyl-3,4-dihydro-2H-1-benzopyran-4-yl}oxidanesulfonic acid	[5-羟基-7-甲氧基-2，2-二甲基-6-(3-苯基丙-2-烯酰基)-3，4-二氢-2H-1-苯并吡喃-4-基]氧代磺酸	Organic acids	有机酸	Organic acids	有机酸	C21H22O9S	3	0.7545	-	10976.5	12836.5	14343.1	46669.2	44701.1	41557.2	1.40492	0.000164245	0.00607748	3.48377	1.80065	up
MW0061198	PG(18:3(6Z,9Z,12Z)/22:6(4Z,7Z,10Z,13Z,16Z,19Z))	PG(18:3(6Z,9Z,12Z)/22:6(4Z,7Z,10Z,13Z,16Z,19Z))	GP	甘油磷脂类	PG	磷脂酰甘油	C46H73O10P	3	0.7418	-	760143	1.00954e+06	657031	316989	207929	184027	1.34471	0.0205495	0.0794368	0.292142	-1.77526	down
MW0130002	2-(2,4-dihydroxyphenyl)-3-(3,7-dimethylocta-2,6-dien-1-yl)-5-hydroxy-8-(hydroxymethyl)-8-methyl-4H,8H-pyrano[3,2-g]chromen-4-one	3-(3，7-二甲基辛-2，6-二烯-1-基)-5-羟基-8，8-二甲基-2-(2，4，5-三羟基苯基)-4H，8H-吡喃并[3，2-g]苯并吡喃-4-酮	Others	其它类	Others	其它	C30H32O7	3	0.7404	-	12012.3	9671.76	10544.5	22159.1	26168.3	26715	1.38915	0.00351629	0.0279498	2.32845	1.21937	up
MW0104066	[2,6-Dihydroxy-3-(3-methylbut-2-enyl)phenyl] hydrogen sulate	[2，6-二羟基-3-(3-甲基-2-丁烯-1-基）苯基]氧代磺酸	Organic acids	有机酸	Organic acids	有机酸	C11H14O6S	3	0.7403	-	11080	12910.8	13919.9	4052.57	4177.18	3150.48	1.39405	0.00394581	0.0295572	0.300185	-1.73607	down
MW0129980	2-(2,4,5-trihydroxyphenyl)-3,4-dihydro-2H-chromene-3,5,7-triol	2-(2，4，5-三羟基苯基)-3，4-二氢-2H-1-苯并吡喃-3，5，7-三醇	Benzene and substituted derivatives	苯及其衍生物	Benzene and substituted derivatives	苯及其衍生物	C15H14O7	3	0.7403	-	800891	1.02184e+06	946842	424051	387705	383101	1.39339	0.0123761	0.0574587	0.431422	-1.21283	down
MW0131219	3-(3,7-dimethylocta-2,6-dien-1-yl)-7-hydroxy-8-(3-methylbut-2-en-1-yl)-2-(2,4,5-trihydroxyphenyl)-4H-chromen-4-one	6-{4-[3-(3，7-二甲基辛-2，6-二烯-1-基)-7-羟基-8-(3-甲基丁-2-烯-1-基)-4-氧代-4H-苯并吡喃-2-基]-3-羟基苯氧基}-3，4，5-三羟基恶烷-2-羧酸	Others	其它类	Others	其它	C30H34O6	3	0.7398	-	6287.37	5330.09	4953.6	553.16	1262.95	4214.35	1.06259	0.0751249	0.188523	0.363915	-1.45833	down
MW0116190	[3-(6,7-dimethoxy-2H-1,3-benzodioxol-5-yl)oxiran-2-yl]methanol	[3-(6，7-二甲氧基-2H-1，3-苯并二氧杂环戊烯-5-基）环氧乙烷-2-基]甲醇	Benzene and substituted derivatives	苯及其衍生物	Benzene and substituted derivatives	苯及其衍生物	C12H14O6	3	0.7329	-	1.41887e+06	1.52671e+06	1.49436e+06	594491	601899	599898	1.41612	0.00125263	0.0163218	0.404574	-1.30553	down
MW0137452	Avenanthramide 1s	Avenanthramide 1s	Alcohol and amines	醇、胺类	Amines	胺类	C18H17NO6	3	0.7249	-	20481.8	20393.6	21900.3	5708.07	6559.21	8406.36	1.38879	0.000363908	0.00901984	0.329325	-1.60242	down
MW0129360	{5-hydroxy-6-[3-(4-hydroxyphenyl)propanoyl]-7-methoxy-2,2-dimethyl-3,4-dihydro-2H-1-benzopyran-4-yl}oxidanesulfonic acid	{5-羟基-6-[3-(4-羟基苯基）丙酰基]-7-甲氧基-2，2-二甲基-3，4-二氢-2H-1-苯并吡喃-4-基}氧烷磺酸	Organic acids	有机酸	Organic acids	有机酸	C21H24O9S	3	0.7221	-	1458.32	2225.07	2945.8	4778.55	7214.65	4647.35	1.25267	0.0381752	0.118267	2.51019	1.3278	up
MW0128759	[4-(5,7-dihydroxy-4-oxo-3,4-dihydro-2H-1-benzopyran-2-yl)-5-hydroxy-9,13,13-trimethyl-8-oxatetracyclo[7.4.1.0(2),.0(1)(2),(1)]tetradeca-2(7),3,5-trien-10-yl]oxidanesulfonic acid	[4-(5，7-二羟基-4-氧代-3，4-二氢-2H-1-苯并吡喃-2-基)-5-羟基-9，13，13-三甲基-8-氧杂四环[7.4.1.0（2），0（1）（2），（1）]十四-2（7)-3，5-三烯-10-基]氧代磺酸	Organic acids	有机酸	Organic acids	有机酸	C25H26O10S	3	0.7214	-	2129.54	1612.72	551.56	357.64	446.89	676.95	1.02844	0.176694	0.332468	0.345026	-1.53522	down
MW0134479	5-hydroxy-2-(3-hydroxyphenyl)-7-methoxy-6-[3,4,5-trihydroxy-6-(hydroxymethyl)oxan-2-yl]-4H-chromen-4-one	5-羟基-2-(3-羟基苯基)-7-甲氧基-6-[3，4，5-三羟基-6-(羟甲基）恶烷-2-基]-4H-苯并吡喃-4-酮	Others	其它类	Ketone compounds	酮类化合物	C22H22O10	3	0.721	-	1.01159e+06	941255	966426	455168	443079	421474	1.41348	0.000229287	0.00692499	0.452073	-1.14537	down
MW0133490	4-[3-(3,4-dihydroxyphenyl)-2-hydroxypropyl]benzene-1,2,3,5-tetrol	4-[3-(3，4-二羟基苯基)-2-羟基丙基]苯-1，2，3，5-四醇	Benzene and substituted derivatives	苯及其衍生物	Benzene and substituted derivatives	苯及其衍生物	C15H16O7	3	0.7201	-	121697	81138.9	122071	19194.5	52352.4	34833.1	1.24478	0.0149835	0.0652092	0.327417	-1.6108	down
MW0130106	2-(3,4-dihydroxy-5-methoxyphenyl)-3,5,7-trihydroxy-6-methoxy-3,4-dihydro-2H-1-benzopyran-4-one	2-(3，4-二羟基-5-甲氧基苯基)-3，5，7-三羟基-6-甲氧基-3，4-二氢-2H-1-苯并吡喃-4-酮	Benzene and substituted derivatives	苯及其衍生物	Benzene and substituted derivatives	苯及其衍生物	C17H16O9	3	0.7184	-	7385.21	11179.8	18373.8	5717.61	4950.13	4056.55	1.18661	0.145546	0.292786	0.398614	-1.32694	down
MW0132160	3,4,5-Trihydroxy-6-[5-hydroxy-2-(4-methoxyphenyl)-4-oxochromen-7-yl]oxyoxane-2-carboxylic acid	3，4，5-三羟基-6-{[5-羟基-2-(4-甲氧基苯基)-4-氧代-4H-苯并吡喃-7-基]氧}恶烷-2-羧酸	Organic acids	有机酸	Organic acids	有机酸	C22H20O11	3	0.7174	-	17111.5	10984.7	7096.92	6707.93	5470.92	5179.82	1.09632	0.175373	0.330916	0.493241	-1.01964	down
MW0136414	6-{4-[2,3-dioxo-3-(2,4,6-trihydroxyphenyl)propyl]-2-hydroxyphenoxy}-3,4,5-trihydroxyoxane-2-carboxylic acid	6-{4-[2，3-二氧代-3-(2，4，6-三羟基苯基）丙基]-2-羟基苯氧基}-3，4，5-三羟基恶烷-2-羧酸	Organic acids	有机酸	Organic acids	有机酸	C21H20O13	3	0.7171	-	20121.6	18495.7	16656.9	7902.3	7995.73	7444.93	1.40448	0.0073793	0.0422259	0.422312	-1.24362	down
MW0105120	3-Oxododecanoic acid	3-氧十二烷酸	Organic acids	有机酸	Organic acids	有机酸	C12H22O3	3	0.7171	-	105752	109342	103238	45551.4	46968.8	45251.3	1.41609	0.000351729	0.0088299	0.432792	-1.20825	down
MW0139072	N-(4-aminobutyl)-3-[3-methoxy-4-(sulfooxy)phenyl]prop-2-enimidic acid	N-(4-氨基丁基)-3-[4-羟基-3-(磺氧基）苯基]丙烯酰胺酸	Organic acids	有机酸	Organic acids	有机酸	C14H20N2O6S	3	0.7134	-	394.34	1100.07	155.25	1346.38	1661.67	2302.21	1.10114	0.0378404	0.117891	3.219	1.68661	up
MW0128989	{10-butanoyl-5-hydroxy-2,2-dimethyl-8-oxo-6-propyl-2H,3H,4H,8H-pyrano[3,2-g]chromen-3-yl}oxidanesulfonic acid	{10-丁酰基-5-羟基-2，2-二甲基-8-氧代-6-丙基-2H，3H，4H，8H-吡喃并[3，2-g]苯并吡喃-3-基}氧烷磺酸	Organic acids	有机酸	Organic acids	有机酸	C21H26O9S	3	0.7119	-	15620.6	14393.9	16338.1	4373.82	2488.67	3081.57	1.38615	0.000107638	0.00472881	0.214531	-2.22074	down
MW0130247	2-(3-hydroxyphenyl)-6-[3,4,5-trihydroxy-6-(hydroxymethyl)oxan-2-yl]-3,4-dihydro-2H-1-benzopyran-3,5,7-triol	2-(3-羟基苯基)-6-[3，4，5-三羟基-6-(羟甲基）恶烷-2-基]-3，4-二氢-2H-1-苯并吡喃-3，5，7-三醇	Benzene and substituted derivatives	苯及其衍生物	Benzene and substituted derivatives	苯及其衍生物	C21H24O10	3	0.7053	-	5834.38	10378.1	7945.53	4487.99	2522.44	4599.69	1.16505	0.0663042	0.173003	0.48059	-1.05712	down
MW0013808	3,4,5-Trihydroxy-6-[5-(4-methoxyphenyl)-2-methyl-3-oxopentoxy]oxane-2-carboxylic acid	3，4，5-三羟基-6-{[5-(4-甲氧基苯基)-2-甲基-3-氧代戊基]氧}氧烷-2-羧酸	Organic acids	有机酸	Organic acids	有机酸	C19H26O9	3	0.7042	-	274.83	316.38	457.74	565.71	1528.06	1943.32	1.18705	0.13225	0.273503	3.8487	1.94437	up
MW0133789	demethylmoracin I	去甲基吗拉辛Ⅰ	Heterocyclic compounds	杂环化合物	Heterocyclic compounds	杂环化合物	C19H18O4	3	0.7036	-	109510	116956	113909	40567.9	31277	33826.8	1.4051	3.81295e-05	0.0032566	0.310457	-1.68753	down
MW0104460	2-[(4-Methoxy-1-benzouran-5-carbonyl)amino]acetic acid	2-{[羟基（4-甲氧基-1-苯并呋喃-5-基）亚甲基]氨基}乙酸	Organic acids	有机酸	Organic acids	有机酸	C12H11NO5	3	0.701	-	3566.83	2277.91	4081.33	7540.01	7003.72	7011.37	1.29637	0.0120093	0.0562045	2.17156	1.11873	up
MW0131090	3-(3,4-dihydroxy-5-methoxyphenyl)-1-(2,4,6-trihydroxyphenyl)propane-1,2-dione	3-(3，4-二羟基-5-甲氧基苯基)-1-(2，4，6-三羟基苯基)-1，2-丙二酮	Others	其它类	Ketone compounds	酮类化合物	C16H14O8	3	0.7	-	15398.8	17602.6	15521.2	10955	5598.73	5287.96	1.23878	0.0277129	0.0957436	0.450133	-1.15158	down
MW0134055	5,7-dihydroxy-2-(3-hydroxyphenyl)-6-[3,4,5-trihydroxy-6-(hydroxymethyl)oxan-2-yl]-8-(3,4,5-trihydroxyoxan-2-yl)-4H-chromen-4-one	5，7-二羟基-2-(3-羟基苯基)-6-[3，4，5-三羟基-6-(羟甲基）恶烷-2-基]-8-(3，4，5-三羟基恶烷-2-基)-4H-苯并吡喃-4-酮	Others	其它类	Ketone compounds	酮类化合物	C26H28O14	3	0.6994	-	591872	526354	502944	238280	168786	52896.5	1.19445	0.00833912	0.0452974	0.283723	-1.81744	down
MW0137199	8-hydroxy-3-(4-hydroxy-3-methoxyphenyl)-7-methoxy-3,4-dihydro-2H-1-benzopyran-4-one	8-羟基-3-(4-羟基-3-甲氧基苯基)-7-甲氧基-3，4-二氢-2H-1-苯并吡喃-4-酮	Benzene and substituted derivatives	苯及其衍生物	Benzene and substituted derivatives	苯及其衍生物	C17H16O6	3	0.6989	-	8950.59	14486	10487.9	2071.32	3759.11	2074.25	1.3462	0.024612	0.0888656	0.233008	-2.10155	down
MW0011668	(Z)-2-Methyl-2-butene-1,4-diol 4-O-beta-D-Glucopyranoside	(Z)-2-Methyl-2-butene-1,4-diol 4-O-beta-D-Glucopyranoside	Others	其它类	Saccharides	糖类	C11H20O7	3	0.6966	-	1108.86	135.34	350.28	1814.37	1336.03	1658.6	1.08015	0.0497623	0.141599	3.01603	1.59265	up
MW0129760	1-[3-(6-{2,4-dihydroxy-3-[(1E)-3-methylbut-1-en-1-yl]benzoyl}-5-(2,4-dihydroxyphenyl)-3-methylcyclohex-2-en-1-yl)-2,4-dihydroxyphenyl]-3-(2,4,5-trihydroxyphenyl)propan-1-one	1-[3-(6-{2，4-二羟基-3-[（1E)-3-甲基丁-1-烯-1-基]苯甲酰基}-5-(2，4-二羟基苯基)-3-甲基环己-2-烯-1-基)-2，4-二羟基苯基]-3-(2，4，5-三羟基苯基）丙-1-酮	Benzene and substituted derivatives	苯及其衍生物	Benzene and substituted derivatives	苯及其衍生物	C40H40O11	3	0.6902	-	295.61	159.3	83.36	260.71	355.19	512.55	1.00421	0.112202	0.244401	2.09644	1.06794	up
MW0134536	5-hydroxy-6-(2-hydroxy-2-methylpropanoyl)-8,8-dimethyl-4-phenyl-2H,8H-pyrano[2,3-f]chromen-2-one	5-羟基-6-(2-羟基-2-甲基丙酰基)-8，8-二甲基-4-苯基-2H，8H-吡喃并[2，3-f]色烯-2-酮	Others	其它类	Ketone compounds	酮类化合物	C24H22O6	3	0.6885	-	10523.8	10296	9078.55	24049.3	27145.9	28180	1.40493	0.00250354	0.0239382	2.65483	1.40862	up
MW0128083	(3-{10-butanoyl-5,7-dihydroxy-8,8-dimethyl-2-oxo-2H,6H,7H,8H-pyrano[3,2-g]chromen-4-yl}propoxy)sulfonic acid	（3-{10-丁酰基-5，7-二羟基-8，8-二甲基-2-氧代-2H，6H，7H，8H-吡喃并[3，2-g]苯并吡喃-4-基}丙氧基）磺酸	Organic acids	有机酸	Organic acids	有机酸	C21H26O10S	3	0.6871	-	88.28	307.83	1915.7	1725.56	2664.1	5485	1.03916	0.141752	0.287036	4.2714	2.09471	up
MW0130244	2-(3-hydroxyphenyl)-4-[3,5,7-trihydroxy-2-(3-hydroxyphenyl)-3,4-dihydro-2H-1-benzopyran-8-yl]-8-[3,4,5-trihydroxy-6-(hydroxymethyl)oxan-2-yl]-3,4-dihydro-2H-1-benzopyran-3,5,7-triol	2-(3-羟基苯基)-4-[3，5，7-三羟基-2-(3-羟基苯基)-3，4-二氢-2H-1-苯并吡喃-8-基]-8-[3，4，5-三羟基-6-(羟甲基）恶烷-2-基]-3，4-二氢-2H-1-苯并吡喃-3，5，7-三醇	Benzene and substituted derivatives	苯及其衍生物	Benzene and substituted derivatives	苯及其衍生物	C36H36O15	3	0.6868	-	1410.98	12290.9	8768.28	502.63	496.2	2187.54	1.06066	0.179463	0.335718	0.141804	-2.81803	down
MW0130250	2-(3-hydroxyphenyl)-8-[3,4,5-trihydroxy-6-(hydroxymethyl)oxan-2-yl]-3,4-dihydro-2H-1-benzopyran-3,5,7-triol	2-(3-羟基苯基)-8-[3，4，5-三羟基-6-(羟甲基）恶烷-2-基]-3，4-二氢-2H-1-苯并吡喃-3，5，7-三醇	Benzene and substituted derivatives	苯及其衍生物	Benzene and substituted derivatives	苯及其衍生物	C21H24O10	3	0.6847	-	46679.3	40864.3	46091.7	17439.2	8857.42	18661.8	1.30549	0.00271197	0.0250116	0.336426	-1.57164	down
MW0134936	6-(3-{8-[3,7-dihydroxy-2-(3-hydroxyphenyl)-3,4-dihydro-2H-1-benzopyran-4-yl]-3,5,7-trihydroxy-3,4-dihydro-2H-1-benzopyran-2-yl}phenoxy)-3,4,5-trihydroxyoxane-2-carboxylic acid	6-(3-{8-[3,7-二羟基-2-(3-羟基苯基)-3,4-二氢-2H-1-苯并吡喃-4-基]-3,5,7-三羟基-3,4-二氢-2H-1-苯并吡喃-2-基]-苯氧基)-3,4,5-三羟基氧烷-2-羧酸	Organic acids	有机酸	Organic acids	有机酸	C36H34O15	3	0.6808	-	36178	37628.5	39304.4	13514.5	14129.5	12105.8	1.41087	6.82926e-05	0.00401875	0.351422	-1.50872	down
MW0130653	2-{3-[(E)-2-(2,4-dihydroxyphenyl)ethenyl]-5-hydroxyphenoxy}-6-(hydroxymethyl)oxane-3,4,5-triol	2-{3-[（E)-2-(2，4-二羟基苯基）乙烯基]-5-羟基苯氧基}-6-(羟甲基）恶烷-3，4，5-三醇	Alcohol and amines	醇、胺类	Alcohols	醇类	C20H22O9	3	0.6805	-	3473.63	70.36	2244.08	10745	10189	13114.5	1.03189	0.00224196	0.0224388	5.88252	2.55643	up
MW0135269	6-[(3,3-dimethyloxiran-2-yl)methyl]-5-hydroxy-7-methoxy-2-(3,4,5-trimethoxyphenyl)-3,4-dihydro-2H-1-benzopyran-4-one	6-[（3，3-二甲基环氧乙烷-2-基）甲基]-5-羟基-7-甲氧基-2-(3，4，5-三甲氧基苯基)-3，4-二氢-2H-1-苯并吡喃-4-酮	Benzene and substituted derivatives	苯及其衍生物	Benzene and substituted derivatives	苯及其衍生物	C24H28O8	3	0.6799	-	1.23206e+06	1.42636e+06	1.3677e+06	412526	420797	419333	1.4138	0.00379462	0.0289585	0.311132	-1.6844	down
MW0128068	(2Z)-3-phenyl-2-[(sulfooxy)methyl]prop-2-enoic acid	（2Z)-3-苯基-2-[（硫氧基）甲基]丙-2-烯酸	Organic acids	有机酸	Organic acids	有机酸	C10H10O6S	3	0.6785	-	45978.2	45822.2	41139.3	9413.09	15491.9	13753	1.37651	0.000218862	0.00685836	0.290793	-1.78193	down
MW0061302	[(2R)-3-[[(2S)-2,3-dihydroxypropoxy]-hydroxyphosphoryl]oxy-2-(10-methylundecanoyloxy)propyl] 10-methylundecanoate	PG(i-12:0/i-12:0)	GP	甘油磷脂类	PG	磷脂酰甘油	C30H59O10P	3	0.6785	-	1950.6	1927.61	3104.03	5068.33	3597.59	6329.39	1.21789	0.0581667	0.15706	2.14764	1.10275	up
MW0055631	PA(16:0/22:6(4Z,7Z,10Z,13Z,16Z,19Z))	PA(16:0/22:6(4Z,7Z,10Z,13Z,16Z,19Z))	GP	甘油磷脂类	PA	磷脂酸	C41H69O8P	3	0.6765	-	10566.7	82003.2	9872.42	124747	156294	53625.8	1.0242	0.119648	0.255075	3.26688	1.70792	up
MW0128857	[5-hydroxy-7-methoxy-2,2-dimethyl-6-(3-phenylpropanoyl)-3,4-dihydro-2H-1-benzopyran-4-yl]oxidanesulfonic acid	[5-羟基-7-甲氧基-2，2-二甲基-6-(3-苯基丙酰基)-3，4-二氢-2H-1-苯并吡喃-4-基]氧代磺酸	Organic acids	有机酸	Organic acids	有机酸	C21H24O8S	3	0.6749	-	4029.3	4809.54	7176.62	1161.94	540.75	1192.22	1.33579	0.0382362	0.11833	0.180757	-2.46787	down
MW0111126	N,N-Diphenyl-p-phenylenediamine	N,N-二苯基-对苯二胺	Alcohol and amines	醇、胺类	Amines	胺类	C18H16N2	3	0.6724	-	1529.76	2071.22	1367.04	353.54	326.31	788.35	1.27938	0.0140041	0.0623662	0.29553	-1.75862	down
MW0129308	{4-[3-(5-hydroxy-2,2-dimethyl-2H-chromen-6-yl)propanoyl]phenyl}oxidanesulfonic acid	{4- [3-(5-羟基-2,2-二甲基-2H-铬-6-基）丙酰基]苯基}氧化磺酸	Organic acids	有机酸	Organic acids	有机酸	C20H20O7S	3	0.6707	-	24595.3	20030	20349.7	3107.97	2597.34	2916.12	1.41284	0.00568352	0.0367704	0.132688	-2.91389	down
MW0134152	8-[5,7-Dihydroxy-2-(4-hydroxyphenyl)-4-oxo-2,3-dihydrochromen-3-yl]-5-hydroxy-2-(4-hydroxy-3-methoxyphenyl)-7-[3,4,5-trihydroxy-6-(hydroxymethyl)oxan-2-yl]oxy-2,3-dihydrochromen-4-one	5，7-二羟基-3-[5-羟基-2-(4-羟基-3-甲氧基苯基)-4-氧代-7-{[3，4，5-三羟基-6-(羟甲基）恶烷-2-基]氧基}-3，4-二氢-2H-1-苯并吡喃-8-基]-2-(4-羟基苯基)-3，4-二氢-2H-1-苯并吡喃-4-酮	Benzene and substituted derivatives	苯及其衍生物	Benzene and substituted derivatives	苯及其衍生物	C37H34O16	3	0.6688	-	13203.9	11835.6	5130.78	2785.26	6459.81	3050.79	1.05543	0.124301	0.26232	0.407549	-1.29495	down
MW0136384	6-{4-[(E)-2-{3,5-dihydroxy-4-[(1E)-3-methylbuta-1,3-dien-1-yl]phenyl}ethenyl]phenoxy}-3,4,5-trihydroxyoxane-2-carboxylic acid	6-{4-[（E)-2-{3，5-二羟基-4-[（1E)-3-甲基丁-1，3-二烯-1-基]苯基}乙烯基]苯氧基}-3，4，5-三羟基恶烷-2-羧酸	Organic acids	有机酸	Organic acids	有机酸	C25H26O9	3	0.6682	-	3734.33	3751.2	2570.71	18165.1	14297.7	16535.6	1.39547	0.00369049	0.0285601	4.87244	2.28465	up
MW0130100	Gallocatechol	2-(3,4,5-三羟基苯基)-3,4-二氢-2H-1-苯并吡喃-3,5,7-三醇	Benzene and substituted derivatives	苯及其衍生物	Benzene and substituted derivatives	苯及其衍生物	C15H14O7	3	0.6673	-	75591.1	81693.1	74262.6	31480.8	24582.2	25699.4	1.40088	9.3274e-05	0.00449235	0.353114	-1.50179	down
MW0061270	PG(22:6(4Z,7Z,10Z,13Z,16Z,19Z)/20:2(11Z,14Z))	PG(22:6(4Z,7Z,10Z,13Z,16Z,19Z)/20:2(11Z,14Z))	GP	甘油磷脂类	PG	磷脂酰甘油	C48H79O10P	3	0.6667	-	543538	448641	751982	162089	169428	194141	1.36837	0.0439257	0.129842	0.301381	-1.73034	down
MW0013770	3,4,5-Trihydroxy-6-[3-(4-methoxyphenyl)propoxy]oxane-2-carboxylic acid	3,4,5-三羟基-6-[3-(4-甲氧基苯基）丙氧基]氧烷-2-羧酸	Organic acids	有机酸	Organic acids	有机酸	C16H22O8	3	0.6651	-	10755.2	9353.68	30501.9	35513.4	32144.3	35826.3	1.07029	0.119053	0.254298	2.04471	1.03189	up
MW0131729	3,4,5-trihydroxy-6-[(3-oxo-1,7-diphenylhepta-4,6-dien-2-yl)oxy]oxane-2-carboxylic acid	{[（6E)-3-氧代-1，7-二苯基庚-4，6-二烯-2-基]氧}磺酸	Benzene and substituted derivatives	苯及其衍生物	Benzene and substituted derivatives	苯及其衍生物	C25H26O8	3	0.6616	-	8596.73	7718.9	3948.25	1747.02	963.67	5269.25	1.01184	0.103531	0.231931	0.393801	-1.34446	down
MW0061513	Pgp(22:5(4Z,7Z,10Z,13Z,16Z)/22:6(4Z,7Z,10Z,13Z,16Z,19Z))	PGP(22:5(4Z,7Z,10Z,13Z,16Z)/22:6(4Z,7Z,10Z,13Z,16Z,19Z))	GP	甘油磷脂类	PG-P	磷脂酰甘油磷酸	C50H78O13P2	3	0.6599	-	3065.91	4353.85	3358.01	11638.4	8657.87	12375.6	1.36691	0.0154186	0.0662601	3.03141	1.59999	up
MW0139530	Quercetin 3-xylosyl-(1->6)-glucoside	槲皮素 3-木糖基-(1->6)-葡萄糖苷	Flavonoids	黄酮	Flavones	黄酮	C26H28O16	3	0.6499	-	44388.8	39405.4	40120.9	5066.3	13538.7	6529.73	1.33687	0.00115448	0.0157331	0.202838	-2.3016	down
MW0009582	Pseudohypericin	假金丝桃素	Benzene and substituted derivatives	苯及其衍生物	Benzene and substituted derivatives	苯及其衍生物	C30H16O9	3	0.6457	-	19101.9	15103.5	6522.95	4052	3651.69	4913.1	1.20333	0.126105	0.264581	0.30978	-1.69069	down
MW0132023	3,4,5-Trihydroxy-6-[3-(7-hydroxy-5-methoxy-2,2-dimethyl-3,4-dihydrochromen-6-yl)-4-oxochromen-7-yl]oxyoxane-2-carboxylic acid	3，4，5-三羟基-6-{[3-(7-羟基-5-甲氧基-2，2-二甲基-3，4-二氢-2H-1-苯并吡喃-6-基)-4-氧代-4H-苯并吡喃-7-基]氧}氧杂环己烷-2-羧酸	Organic acids	有机酸	Organic acids	有机酸	C27H28O12	3	0.6451	-	187229	130329	137530	56413.5	67558.5	60378.1	1.36547	0.0335495	0.108852	0.405086	-1.3037	down
MW0134048	5,7-dihydroxy-2-(3-hydroxyphenyl)-3,6-bis[3,4,5-trihydroxy-6-(hydroxymethyl)oxan-2-yl]-4H-chromen-4-one	5，7-二羟基-2-(3-羟基苯基)-3，6-双[3，4，5-三羟基-6-(羟甲基）恶烷-2-基]-4H-苯并吡喃-4-酮	Others	其它类	Ketone compounds	酮类化合物	C27H30O15	3	0.6414	-	65404.5	58952	62682.8	28360.9	33632.6	30839.5	1.39889	0.000255072	0.00733839	0.496329	-1.01063	down
MW0112690	3,4,5-Trihydroxy-6-phenoxyoxane-2-carboxylic acid	3,4,5-三羟基-6-苯氧基氧烷-2-羧酸	Organic acids	有机酸	Organic acids	有机酸	C12H14O7	3	0.6384	-	2873.29	3053.36	6971.3	11219.7	13227.5	15359.6	1.26907	0.00772842	0.0432133	3.08629	1.62588	up
MW0131752	3,4,5-trihydroxy-6-[(5-hydroxy-6-{4-hydroxy-6-methyl-5-oxo-3-[(3,4,5-trihydroxy-6-methyloxan-2-yl)oxy]oxan-2-yl}-2-(4-hydroxyphenyl)-4-oxo-4H-chromen-7-yl)oxy]oxane-2-carboxylic acid	3,4,5-三羟基-6-[（5-羟基-6- {4-羟基-6-甲基-5-氧代-3-[（3,4,5-三羟基-6-甲基恶烷-2-基）氧基]氧杂-2-基} -2-(4-羟基苯基)-4-氧杂-4H-铬基-7-基）氧]恶烷-2-羧酸	Organic acids	有机酸	Organic acids	有机酸	C33H36O19	3	0.6364	-	50632.1	61566.7	53312.8	29312.2	13623.7	20025	1.29198	0.00497999	0.0337995	0.380401	-1.39441	down
MW0136541	6-{5-[(E)-2-{3,5-dihydroxy-4-[(1E)-3-methylbuta-1,3-dien-1-yl]phenyl}ethenyl]-2-hydroxyphenoxy}-3,4,5-trihydroxyoxane-2-carboxylic acid	6-{5-[（E)-2-{3，5-二羟基-4-[（1E)-3-甲基丁-1，3-二烯-1-基]苯基}乙烯基]-2-羟基苯氧基}-3，4，5-三羟基恶烷-2-羧酸	Organic acids	有机酸	Organic acids	有机酸	C25H26O10	3	0.6352	-	6627.15	6261.95	8798.51	2813.97	3899.44	2542.26	1.32152	0.0186219	0.0745443	0.426772	-1.22846	down
MW0132727	3,5-Dihydroxy-2-(4-hydroxyphenyl)-7-[3,4,5-trihydroxy-6-(hydroxymethyl)tetrahydropyran-2-yl]oxy-chromen-4-one	3,5-二羟基-2-(4-羟基苯基)-7-{[3,4,5-三羟基-6-(羟甲基）恶烷-2-基]氧基} -4H-铬-4-	Others	其它类	Ketone compounds	酮类化合物	C21H20O11	3	0.6347	-	345295	294546	312139	145662	141281	131838	1.4051	0.00440419	0.0315339	0.439905	-1.18474	down
MW0013755	3,4,5-trihydroxy-6-({2-[2-(2-hydroxypropan-2-yl)-7-oxo-2H,3H,7H-furo[3,2-g]chromen-6-yl]-2-methylbut-3-en-1-yl}oxy)oxane-2-carboxylic acid	3，4，5-三羟基-6-({2-[2-(2-羟基丙-2-基)-7-氧代-2H，3H，7H-呋喃并[3，2-g]苯并吡喃-6-基]-2-甲基丁-3-烯-1-基}氧基）恶烷-2-羧酸	Organic acids	有机酸	Organic acids	有机酸	C25H30O11	3	0.6343	-	315.69	423.63	242.9	3418.55	3741.27	3373.6	1.4048	0.000228724	0.00692499	10.7241	3.42278	up
MW0128077	(3,4,5,6-Tetrahydroxyoxan-2-yl)methyl 3-(4-hydroxy-3-methoxyphenyl)prop-2-enoate	（3，4，5，6-四羟基恶烷-2-基）（2E)-3-(4-羟基-3-甲氧基苯基）丙-2-烯酸甲酯	Others	其它类	Lactones	内酯类化合物	C16H20O9	3	0.6311	-	263308	350048	339526	151147	147261	154588	1.37621	0.0252775	0.0904116	0.475396	-1.0728	down
MW0134900	CID 74977437	6-(3,4-二羟基-6-甲基-5-氧代恶烷-2-基)-5,7-二羟基-2-(4-羟基苯基)-4H-铬-4-	Others	其它类	Ketone compounds	酮类化合物	C21H18O9	3	0.6303	-	47.52	300	156.86	250.23	855.26	1107.45	1.04765	0.146099	0.293552	4.38745	2.13338	up
MW0112583	3,4,5-trihydroxy-6-{[2-(4-methoxyphenyl)propanoyl]oxy}oxane-2-carboxylic acid	3，4，5-三羟基-6-{[2-(4-甲氧基苯基）丙酰基]氧基}恶烷-2-羧酸	Organic acids	有机酸	Organic acids	有机酸	C16H20O9	3	0.6266	-	225142	228319	218912	121603	21065.3	107037	1.04822	0.045194	0.132896	0.371379	-1.42904	down
MW0112584	3,4,5-trihydroxy-6-{[2-(hydroxymethyl)-2-methyl-2H-chromen-5-yl]oxy}oxane-2-carboxylic acid	3，4，5-三羟基-6-{[2-(羟甲基)-2-甲基-2H-苯并吡喃-5-基]氧}氧杂环己烷-2-羧酸	Organic acids	有机酸	Organic acids	有机酸	C17H20O9	3	0.6254	-	20130.7	19192.6	18694.8	6647.64	11157.5	8994.9	1.3241	0.00967353	0.0493312	0.461925	-1.11427	down
MW0132524	3,4,5-trihydroxy-6-{5-hydroxy-2-[5-hydroxy-7-methoxy-6-(3-methylbut-1-en-1-yl)-3-(3-methylbut-2-en-1-yl)-4-oxo-4H-chromen-2-yl]phenoxy}oxane-2-carboxylic acid	6-{[2-(2，4-二羟基苯基)-7-甲氧基-6-(3-甲基丁-1-烯-1-基)-3-(3-甲基丁-2-烯-1-基)-4-氧代-4H-苯并吡喃-5-基]氧基}-3，4，5-三羟基恶烷-2-羧酸	Organic acids	有机酸	Organic acids	有机酸	C32H36O12	3	0.6169	-	96.92	100.58	45.02	239.44	148.97	559.48	1.14248	0.19751	0.355855	3.9085	1.96662	up
MW0112593	3,4,5-trihydroxy-6-{[3-(3-methoxyphenyl)propanoyl]oxy}oxane-2-carboxylic acid	3，4，5-三羟基-6-{[3-(3-甲氧基苯基）丙酰基]氧基}恶烷-2-羧酸	Organic acids	有机酸	Organic acids	有机酸	C16H20O9	3	0.6161	-	4272.23	3282.74	2147.57	6102.64	8372.94	7538.89	1.25834	0.0106248	0.0520554	2.26894	1.18202	up
MW0113434	6-[(4,5-dihydroxy-7-methoxy-2,2-dimethyl-3,4-dihydro-2H-1-benzopyran-6-yl)oxy]-3,4,5-trihydroxyoxane-2-carboxylic acid	6-[（4，5-二羟基-7-甲氧基-2，2-二甲基-3，4-二氢-2H-1-苯并吡喃-6-基）氧基]-3，4，5-三羟基恶烷-2-羧酸	Organic acids	有机酸	Organic acids	有机酸	C18H24O11	3	0.6156	-	2.06642e+06	2.1353e+06	2.05497e+06	733622	762831	367059	1.32646	0.00591057	0.0376033	0.297843	-1.74738	down
MW0104626	2-amino-4-({1-[(carboxymethyl)-C-hydroxycarbonimidoyl]-2-{[3-hydroxy-3-methyl-1-({7-oxo-7H-furo[3,2-g]chromen-4-yl}oxy)butan-2-yl]sulfanyl}ethyl}-C-hydroxycarbonimidoyl)butanoic acid	2-氨基-4-({1-[（羧甲基)-C-羟基亚氨基甲酰基]-2-{[3-羟基-3-甲基-1-({7-氧代-7H-呋喃并[3，2-g]苯并吡喃-4-基}氧基）丁烷-2-基]硫烷基}乙基}-C-羟基亚氨基甲酰基）丁酸	Organic acids	有机酸	Organic acids	有机酸	C26H31N3O11S	3	0.6153	-	1200.21	1764.86	1596.03	12428.6	12128.8	12047.4	1.40913	2.84389e-06	0.00144509	8.02544	3.00458	up
MW0112467	3,4,5-trihydroxy-6-[2-hydroxy-4-(2-hydroxy-3-methoxy-3-oxopropyl)phenoxy]oxane-2-carboxylic acid	3，4，5-三羟基-6-[2-羟基-4-(2-羟基-3-甲氧基-3-氧代丙基）苯氧基]恶烷-2-羧酸	Organic acids	有机酸	Organic acids	有机酸	C16H20O11	3	0.6144	-	180542	208346	220321	89069.5	90584.7	84553.4	1.40199	0.00907723	0.0475243	0.433689	-1.20527	down
MW0130520	(4-Hydroxybenzyl)succinic acid	2-[（4-羟基苯基）甲基]丁二酸	Organic acids	有机酸	Organic acids	有机酸	C11H12O5	3	0.6105	-	106053	86400	121555	69806.7	39918.1	43906.8	1.2473	0.0182896	0.0738626	0.489259	-1.03133	down
MW0132454	3,4,5-trihydroxy-6-{3-hydroxy-5-[(E)-2-(4-hydroxyphenyl)ethenyl]-2-[(1E)-3-methylbut-1-en-1-yl]phenoxy}oxane-2-carboxylic acid	3，4，5-三羟基-6-{3-羟基-5-[（E)-2-(4-羟基苯基）乙烯基]-2-[（1E)-3-甲基丁-1-烯-1-基]苯氧基}恶烷-2-羧酸	Organic acids	有机酸	Organic acids	有机酸	C25H28O9	3	0.6097	-	18539.8	19382.5	22196.9	66823.3	31735.9	33708.4	1.17764	0.167795	0.321629	2.20009	1.13756	up
MW0104559	2-amino-4-({1-[(carboxymethyl)-C-hydroxycarbonimidoyl]-2-[(4-{3-[2-(2,4-dihydroxyphenyl)-2-oxoethyl]-4,6-dihydroxy-2-methoxyphenyl}-3-hydroxy-2-methylbutan-2-yl)sulfanyl]ethyl}-C-hydroxycarbonimidoyl)butanoic acid	2-氨基-4-({1-[（羧甲基)-C-羟基亚氨基甲酰基]-2-[（4-{3-[2-(2，4-二羟基苯基)-2-氧代乙基]-4，6-二羟基-2-甲氧基苯基}-3-羟基-2-甲基丁-2-基）硫烷基]乙基}-C-羟基亚氨基甲酰基）丁酸	Organic acids	有机酸	Organic acids	有机酸	C30H39N3O13S	3	0.6092	-	17759.5	5979.18	16114.9	2403.11	2865.28	2312.56	1.29084	0.09965	0.227661	0.19022	-2.39426	down
MW0127907	(2E)-2-methyl-3-[3-(sulfooxy)phenyl]prop-2-enoic acid	（2E)-2-甲基-3-[3-(磺氧基）苯基]丙-2-烯酸	Organic acids	有机酸	Organic acids	有机酸	C10H10O6S	3	0.6075	-	10285.8	20294.6	23836.4	2112.91	2888.67	1422.36	1.35387	0.0572613	0.155519	0.118051	-3.08252	down
MW0135865	6-{[3-(2,4-dihydroxy-3-methoxyphenyl)prop-2-enoyl]oxy}-3,4,5-trihydroxyoxane-2-carboxylic acid	3，4，5-三羟基-6-{[3-(3-甲氧基苯基）丙-2-烯酰基]氧}氧杂环己烷-2-羧酸	Benzene and substituted derivatives	苯及其衍生物	Benzene and substituted derivatives	苯及其衍生物	C16H18O11	3	0.6067	-	3941.87	3072.18	1532.85	33424.6	19073.6	15507.5	1.33929	0.0663062	0.173003	7.95677	2.99218	up
MW0132239	3,4,5-trihydroxy-6-{[7-hydroxy-2-(4-methoxyphenyl)-4-oxo-3,6-bis[3,4,5-trihydroxy-6-(hydroxymethyl)oxan-2-yl]-4H-chromen-5-yl]oxy}oxane-2-carboxylic acid	3，4，5-三羟基-6-{[7-羟基-2-(4-甲氧基苯基)-4-氧代-3，6-双[3，4，5-三羟基-6-(羟甲基）恶烷-2-基]-4H-色烯-5-基]氧}恶烷-2-羧酸	Organic acids	有机酸	Organic acids	有机酸	C34H40O21	3	0.6042	-	47079.8	58696.4	55734.8	126455	146399	127235	1.39527	0.00158196	0.0184755	2.47716	1.30869	up
MW0130529	2-[1-Hydroxy-3-(4-methoxyphenyl)propyl]-3,5-dimethoxyphenol	2,5-苯基-3-甲氧基苯酚	Benzene and substituted derivatives	苯及其衍生物	Benzene and substituted derivatives	苯及其衍生物	C18H22O5	3	0.6005	-	43643.9	42540.4	42044	108820	102428	111904	1.41509	0.0014257	0.0176907	2.52013	1.3335	up
MW0111423	(3-{5,7-dihydroxy-3-[(3,4,5-trihydroxyoxan-2-yl)oxy]-5H-chromen-2-yl}phenyl)oxidanesulfonic acid	（3-{5，7-二羟基-3-[（3，4，5-三羟基恶烷-2-基）氧]-5H-苯并吡喃-2-基}苯基）氧代磺酸	Organic acids	有机酸	Organic acids	有机酸	C20H19O12S	3	0.5958	-	4852.02	6674.2	5165.72	3900.39	1988.83	2089.02	1.20997	0.0260764	0.0923467	0.47797	-1.06501	down
MW0135232	6-[(2-{[3-(3,4-dimethoxyphenyl)-7-methoxy-8-methyl-4-oxo-4H-chromen-5-yl]oxy}-3,5-dihydroxy-6-(hydroxymethyl)oxan-4-yl)oxy]-3,4,5-trihydroxyoxane-2-carboxylic acid	6-[（2-{[3-(3，4-二甲氧基苯基)-7-甲氧基-8-甲基-4-氧代-4H-苯并吡喃-5-基]氧}-3，5-二羟基-6-(羟甲基）氧烷-4-基）氧]-3，4，5-三羟基氧烷-2-羧酸	Organic acids	有机酸	Organic acids	有机酸	C31H36O17	3	0.5874	-	15716.7	13957.5	17162.2	36690.9	46167.6	37763.6	1.39063	0.0094158	0.0487099	2.57539	1.36479	up
MW0130549	2-[2-hydroxy-3-(4-hydroxy-3-methoxyphenyl)propyl]benzene-1,3,5-triol	2-[2-羟基-3-(4-羟基-3-甲氧基苯基）丙基]苯-1，3，5-三醇	Benzene and substituted derivatives	苯及其衍生物	Benzene and substituted derivatives	苯及其衍生物	C16H18O6	3	0.5836	-	163699	160915	167170	78730.7	78532.9	81588	1.41633	2.47725e-05	0.0026405	0.485684	-1.04191	down
MW0104605	2-amino-4-({1-[(carboxymethyl)-C-hydroxycarbonimidoyl]-2-{[1-hydroxy-3-(4-hydroxyphenyl)-1-(5-methoxy-2,2-dimethyl-2H-chromen-6-yl)-3-oxopropan-2-yl]sulfanyl}ethyl}-C-hydroxycarbonimidoyl)butanoic acid	2-氨基-4-({1-[（[羧甲基)-C-羟基亚碳酰亚胺基] -2-{[1-羟基-3-(4-羟基苯基)-1-(5-甲氧基-2,2-二甲基-2H -chromen-6-yl)-3-oxopropan-2-yl] sulfanyl} ethyl} -C-hydroxycarbonimidoyl）butanoic acid	Organic acids	有机酸	Organic acids	有机酸	C31H37N3O11S	3	0.5825	-	16521.7	19516.2	18697.5	913.77	704.97	764.12	1.41542	0.00250904	0.0239556	0.0435341	-4.52171	down
MW0134041	5,7,3'-Trihydroxy-3,6,8,4'-tetramethoxyflavone	5,7-二羟基-2-(3-羟基-4-甲氧基苯基)-3,6,8-三甲氧基-4H-铬-4-酮	Others	其它类	Ketone compounds	酮类化合物	C19H18O9	3	0.5722	-	9357.03	8573.66	6665.47	7160.57	1401.53	1130.61	1.04271	0.112929	0.245738	0.394074	-1.34346	down
MW0107862	L-gamma-Glutamyl-S-allylthio-L-cysteine	L-γ-谷氨酰-S-烯丙基硫基-L-半胱氨酸	Amino acids and derivatives	氨基酸及其衍生物	Amino acids and derivatives	氨基酸及其衍生物	C11H18N2O5S2	3	0.5643	-	2477.56	674.26	425.96	6179.54	5526.33	4744.23	1.22208	0.00799201	0.0439392	4.59785	2.20096	up
MW0128311	(8-{2-[(3-methylbut-2-enoyl)oxy]propan-2-yl}-2-oxo-2H,8H,9H-furo[2,3-h]chromen-9-yl)oxidanesulfonic acid	（8-{2-[（3-甲基丁-2-烯酰基）氧基]丙-2-基}-2-氧代-2H，8H，9H-呋喃并[2，3-h]色烯-9-基）氧代磺酸	Organic acids	有机酸	Organic acids	有机酸	C19H20O9S	3	0.5641	-	12240.8	12309.3	5753.18	32645.1	22402.2	19971.1	1.20404	0.0411696	0.124216	2.4756	1.30778	up
MW0131030	3-(2,5-dihydroxy-4-methoxyphenyl)-7-hydroxy-3,4-dihydro-2H-1-benzopyran-4-one	3-(2，5-二羟基-4-甲氧基苯基)-7-羟基-3，4-二氢-2H-1-苯并吡喃-4-酮	Benzene and substituted derivatives	苯及其衍生物	Benzene and substituted derivatives	苯及其衍生物	C16H14O6	3	0.5577	-	16523.3	6261.65	4055.28	27040.7	28513.4	16557.8	1.11301	0.0485387	0.139337	2.68671	1.42584	up
MW0132970	3-{3,4-dihydroxy-2-[(2Z)-4-hydroxy-3-(4-methylpent-3-en-1-yl)but-2-en-1-yl]phenyl}propanoic acid	3-{3，4-二羟基-2-[（2Z)-4-羟基-3-(4-甲基戊-3-烯-1-基）丁-2-烯-1-基]苯基}丙酸	Organic acids	有机酸	Organic acids	有机酸	C19H26O5	3	0.5483	-	27354.1	24939.1	12984.2	105514	90895.4	108059	1.35697	0.000395463	0.00952333	4.66422	2.22164	up
MW0128739	[4-(3,5,7-trihydroxy-3,4-dihydro-2H-1-benzopyran-2-yl)phenyl]oxidanesulfonic acid	[4-(3，5，7-三羟基-3，4-二氢-2H-1-苯并吡喃-2-基）苯基]氧代磺酸	Organic acids	有机酸	Organic acids	有机酸	C15H14O8S	3	0.5483	-	25660.3	34106.2	37872.4	24658.8	12319.4	8032.14	1.10839	0.0517065	0.145225	0.460988	-1.1172	down
MW0016168	CID 6918741	CID 6918741	Terpenoids	萜类	Triterpene Saponin	三萜皂苷	C41H60O15	3	0.5476	-	682.1	417.74	422.18	1107.31	1507.26	1890.64	1.31131	0.0347083	0.111005	2.96002	1.56561	up
MW0108623	L-Asparagine, N-[2-(acetylamino)-2-deoxy-beta-D-glucopyranosyl]-	L-天冬酰胺，N-[2-(乙酰氨基)-2-脱氧-β-D-吡喃葡萄糖基]-	Amino acids and derivatives	氨基酸及其衍生物	Amino acids and derivatives	氨基酸及其衍生物	C12H21N3O8	3	0.5286	-	695997	632254	633605	314678	300758	312981	1.41166	0.00268371	0.0249115	0.473234	-1.07938	down
MW0112620	3,4,5-trihydroxy-6-{[4-hydroxy-2,5-bis(hydroxymethyl)-2-{[3,4,5-trihydroxy-6-(hydroxymethyl)oxan-2-yl]oxy}oxolan-3-yl]oxy}oxane-2-carboxylic acid	3，4，5-三羟基-6-{[4-羟基-2，5-二（羟甲基)-2-{[3，4，5-三羟基-6-(羟甲基）恶烷-2-基]氧}氧杂环戊烷-3-基]氧}恶烷-2-羧酸	Organic acids	有机酸	Organic acids	有机酸	C18H30O17	3	0.5248	-	563885	610788	596415	280399	296055	283801	1.41327	0.000796599	0.013213	0.485721	-1.0418	down
MW0133520	4-{[3-(hydroxymethyl)-3-methyloxiran-2-yl]methoxy}-7H-furo[3,2-g]chromen-7-one	4-{[3-(羟甲基)-3-甲基环氧乙烷-2-基]甲氧基}-7H-呋喃并[3，2-g]苯并吡喃-7-酮	Others	其它类	Ketone compounds	酮类化合物	C16H14O6	3	0.5224	-	7849.92	3395.95	3340.88	2531.4	1797.46	1869.01	1.12203	0.199714	0.358219	0.424897	-1.23481	down
MW0132726	3,5-Dihydroxy-2-(4-hydroxyphenyl)-7-[(3,4,5-trihydroxy-6-methyltetrahydro-2H-pyran-2-yl)oxy]-4H-1-benzopyran-4-one	3，5-二羟基-2-(4-羟基苯基)-7-[（3，4，5-三羟基-6-甲氧基-2-基）氧基]-4H-色烯-4-酮	Others	其它类	Ketone compounds	酮类化合物	C21H20O10	3	0.5175	-	5842.4	5594.85	5352.93	1861.28	2113.15	705.21	1.2662	0.00669922	0.0400458	0.278713	-1.84315	down
MW0113615	6-{[10-butanoyl-3-hydroxy-6-(3-hydroxypropyl)-2,2-dimethyl-8-oxo-2H,3H,4H,8H-pyrano[3,2-g]chromen-5-yl]oxy}-3,4,5-trihydroxyoxane-2-carboxylic acid	6-{[10-丁酰基-3-羟基-6-(3-羟基丙基)-2，2-二甲基-8-氧代-2H，3H，4H，8H-吡喃并[3，2-g]苯并吡喃-5-基]氧}-3，4，5-三羟基氧杂环己烷-2-羧酸	Organic acids	有机酸	Organic acids	有机酸	C27H34O13	3	0.5133	-	5610.73	1956.35	3514.76	38996.2	25816.5	37820.5	1.36193	0.014192	0.0628595	9.26139	3.21123	up
MEDL00331	3'-Aenylic Acid	腺苷-3'-磷酸	Nucleotides and derivatives	核苷酸及其衍生物	Nucleotides and derivatives	核苷酸及其衍生物	C10H14N5O7P	3	0.9003	84-21-9	294704	303659	297481	114559	104674	107582	1.41561	1.26459e-06	0.00121786	0.364813	-1.45477	down
MEDP0285	2,6-Diaminooimelic Acid	2,6-二氨基庚二酸	Organic acids	有机酸	Organic acids	有机酸	C7H14N2O4	3	0.6116	583-93-7	27177.6	29021.2	27972.7	57255.8	63917.6	56125	1.40773	0.00445939	0.0316671	2.10639	1.07478	up
MW0141123	1,2-Dioleoyl-sn-glycero-3-phospho-(1'-myo-inositol)	1,2-Dioleoyl-sn-glycero-3-phospho-(1'-myo-inositol)	GP	甘油磷脂类	PI	磷脂酰肌醇	C45H83O13P	3	0.7336	-	50581.5	44348	34129.6	20667.8	12353.6	10698.6	1.30903	0.0113124	0.0539562	0.338759	-1.56167	down
MW0137177	8-{2-[(2-hydroxyacetyl)oxy]propan-2-yl}-2-oxo-2H,8H,9H-furo[2,3-h]chromen-9-yl(2E)-2-methylbut-2-enoate	8-{2-[(2-hydroxyacetyl)oxy]propan-2-yl}-2-oxo-2H,8H,9H-furo[2,3-h]chromen-9-yl(2E)-2-methylbut-2-enoate	Lignans and Coumarins	木脂素和香豆素	Coumarins	香豆素	C21H22O8	3	0.513	-	338166	302566	356677	1.08027e+06	1.21152e+06	1.15908e+06	1.41146	0.000563012	0.0111948	3.45983	1.7907	up
MEDP2169	4-Ethynylaniline	4-乙炔基苯胺	Benzene and substituted derivatives	苯及其衍生物	Benzene and substituted derivatives	苯及其衍生物	C8H7N	2	0.9556	14235-81-5	19755.2	21143	19294.6	72395.4	74738.8	69662.6	1.41581	0.000189906	0.00636479	3.60171	1.84868	up
MW0139541	3-[(2S,3R,4S,5S,6R)-4,5-dihydroxy-6-(hydroxymethyl)-3-[(2S,3R,4R,5R,6S)-3,4,5-trihydroxy-6-methyloxan-2-yl]oxyoxan-2-yl]oxy-2-(3,4-dihydroxyphenyl)-5-hydroxy-7-[(2S,3R,4R,5R,6S)-3,4,5-trihydroxy-6-methyloxan-2-yl]oxychromen-4-one	3-[(2S,3R,4S,5S,6R)-4,5-二羟基-6-(羟甲基)-3-[(2S,3R,4R,5R,6S)-3,4,5-三羟基- 6-methyloxan-2-yl]oxyoxan-2-yl]oxy-2-(3,4-dihydroxyphenyl)-5-hydroxy-7-[(2S,3R,4R,5R,6S)-3,4,5 -trihydroxy-6-methyloxan-2-yl]oxychromen-4-one	Flavonoids	黄酮	Flavones	黄酮	C33H40O20	2	0.923	161993-01-7	225096	175090	153290	45591.3	49911	114337	1.21686	0.0204717	0.079372	0.37913	-1.39923	down
MW0139710	Silicristin	水飞蓟亭	Flavonoids	黄酮	Flavanonols	二氢黄酮醇	C25H22O10	2	0.902	33889-69-9	103206	106197	106104	57374.2	53029.6	32851	1.30388	0.0156241	0.0667024	0.454048	-1.13908	down
MEDTP02544	5-(6-Hydroxy-2,5,7,8-tetramethyl-chroman-2-YL)-2-methyl-pentanoic acid	（±)-α-CMBHC	Organic acids	有机酸	Organic acids	有机酸	C19H28O4	2	0.8862	7083-09-2	1064.89	1671.53	1807.24	213.92	107.62	97.7	1.37718	0.0240015	0.0873784	0.0922692	-3.43801	down
MW0168265	Salicylic acid, valerate	戊酰水杨酸酯	Benzene and substituted derivatives	苯及其衍生物	Benzene and substituted derivatives	苯及其衍生物	C12H14O4	2	0.861	64206-54-8	13626.2	12666.5	19959.1	5246.85	202.52	3425.62	1.05303	0.014666	0.0643442	0.191884	-2.38169	down
MW0109179	Phenylalanylleucine	苯丙氨酸亮氨酸	Amino acids and derivatives	氨基酸及其衍生物	Amino acids and derivatives	氨基酸及其衍生物	C15H22N2O3	2	0.8462	3303-55-7	3276.78	586.26	2254.36	14459.2	3466.66	9573.79	1.07579	0.1476	0.296019	4.49532	2.16842	up
MW0105598	alpha-Guanidinoglutaric acid	α-胍基戊二酸	Organic acids	有机酸	Organic acids	有机酸	C6H11N3O4	2	0.7883	73477-53-9	103569	110296	105505	310608	306150	293005	1.41609	0.000169471	0.00612167	2.84862	1.51026	up
MW0137011	7-Hydroxy-3-(4-methoxyphenyl)-4-methylcoumarin	7-羟基-3-(4-甲氧基苯基)-4-甲基香豆素	Lignans and Coumarins	木脂素和香豆素	Coumarins	香豆素	C17H14O4	2	0.7753	5219-16-9	12596.2	11532.9	13304.4	29813.9	29775.2	32290.9	1.40918	0.000175782	0.00617814	2.45448	1.29542	up
MW0137756	Tricoumaroyl spermidine	N1，N5，N10-三香豆酰亚精胺	Heterocyclic compounds	杂环化合物	Heterocyclic compounds	杂环化合物	C34H37N3O6	2	0.7667	131086-78-7 | 364368-18-3	13169.5	14138.1	14508.8	5735.52	7196.85	7177.03	1.38505	0.000391886	0.00947227	0.480897	-1.0562	down
MW0126908	Uncarine c	钩藤碱 C	Alkaloids	生物碱	Plumerane	吲哚类生物碱	C21H24N2O4	2	0.7556	5629-60-7	5836.31	5812.19	5491.96	12947.4	16647.1	18215.9	1.389	0.0220934	0.0833208	2.78933	1.47992	up
MW0119764	3-Pyrimidin-2-yl-2-pyrimidin-2-ylmethyl-propionic acid	3-嘧啶-2-基-2-嘧啶-2-基甲基-丙酸	Organic acids	有机酸	Organic acids	有机酸	C12H12N4O2	2	0.7502	936643-76-4	14418.6	14913.2	11806.2	35773.9	29610.9	30805.1	1.38525	0.00333597	0.0276796	2.33822	1.22541	up
MW0000741	4-Tert-butylphenoxyacetic acid	（4-叔丁基-苯氧基)-乙酸	Benzene and substituted derivatives	苯及其衍生物	Benzene and substituted derivatives	苯及其衍生物	C12H16O3	2	0.7304	1798-04-5	25635.1	8116.09	7837.84	53902	55647.5	52421.8	1.26246	0.0187962	0.0749128	3.89457	1.96146	up
MW0133409	4',6-Dihydroxyflavone	4，6-二羟基黄酮	Flavonoids	黄酮	Flavones	黄酮	C15H10O4	2	0.7256	63046-09-3	31451.7	30993.3	36371.7	8933.47	8351.17	10068.2	1.40839	0.0029529	0.0260866	0.276803	-1.85307	down
MW0114361	D-Ribulose 1,5-bisphosphate	D-核糖-1,5-双磷酸酯	Others	其它类	Saccharides	糖类	C5H12O11P2	2	0.7141	24218-00-6 | 2002-28-0	4632.31	3443.2	6903.45	8595.59	12349.8	11899.6	1.23117	0.0195979	0.0770321	2.19274	1.13273	up
MW0055509	Ostruthin	王草质	Lignans and Coumarins	木脂素和香豆素	Coumarins	香豆素	C19H22O3	2	0.7072	148-83-4	6091.43	8084.64	9537.08	28385.7	17868.3	26438.8	1.33853	0.0282755	0.0971195	3.06551	1.61613	up
MW0011757	[5-ethenyl-3-hydroxy-4-(3-hydroxyprop-1-en-2-yl)-2-(3-methoxy-3-oxoprop-1-en-2-yl)-5-methylcyclohexyl] (Z)-4-acetyloxy-2-(hydroxymethyl)but-2-enoate	[5-ethenyl-3-hydroxy-4-(3-hydroxyprop-1-en-2-yl)-2-(3-methoxy-3-oxoprop-1-en-2-yl)-5-methylcyclohexyl] (Z)-4-acetyloxy-2-(hydroxymethyl)but-2-enoate	Others	其它类	Lactones	内酯类化合物	C23H32O9	3	0.9801	864683-90-9	80402.9	83331.3	85610.6	193452	179645	181853	1.41394	0.000617064	0.0119409	2.22563	1.15422	up
ZINC5768349	[(1S,3R,4R,6S,8S,9R,10R,13R,14R,16R)-3,4,6,9,14-pentahydroxy-5,5,9,14-tetramethyl-16-tetracyclo[11.2.1.01,10.04,8]hexadecanyl] propanoate	[（1S，3R，4R，6S，8S，9R，10R，13R，14R，16R)-3，4，6，9，14-五羟基-5，5，9，14-四甲基-16-四环[11.2.1.01，10.04，8]十六烷]丙酸酯	Others	其它类	Lactones	内酯类化合物	C23H38O7	3	0.932	23984-17-0	33218.5	105610	145354	190364	362031	276237	1.10416	0.04567	0.133493	2.91583	1.54391	up
MW0054021	Ingenol	巨大戟醇	Terpenoids	萜类	Ditepenoids	二萜	C20H28O5	3	0.9127	30220-46-3	12024.9	14101.5	13000.5	3614.26	3327.37	2583.77	1.40076	0.000714895	0.0126829	0.243449	-2.03831	down
MW0138085	Epimedin C	朝藿定 C	Flavonoids	黄酮	Flavonols	黄酮醇	C39H50O19	3	0.8773	110642-44-9	13362.5	3863.94	7731.6	31750.1	35492	29664.5	1.27252	0.00353067	0.0279956	3.88279	1.95709	up
MW0103367	3-Deaza-2'-deoxyadenosine	3-Deaza-2'-脱氧腺苷	Nucleotides and derivatives	核苷酸及其衍生物	Nucleotides and derivatives	核苷酸及其衍生物	C11H14N4O3	3	0.8708	78582-17-9	174116	202957	186527	80378.1	103554	80209.3	1.37507	0.000960222	0.0142552	0.468668	-1.09336	down
MEDP1563	2-Amino-2-deoxy-D-gluconic acid	D-氨基葡萄糖酸	Others	其它类	Saccharides	糖类	C6H13NO6	3	0.8687	3646-68-2 | 6165-14-6	71956.6	72103.2	70589.3	145981	157745	155365	1.41484	0.00165209	0.0190154	2.1388	1.0968	up
MW0146956	Cabucine	卡布辛	Alkaloids	生物碱	Alkaloids	生物碱	C22H26N2O4	3	0.862	16812-97-8	13687.7	1761.82	9733.23	33894.4	38478.5	32334.2	1.14217	0.00662222	0.0398682	4.15789	2.05585	up
MW0000156	Brucine	马钱子碱	Alkaloids	生物碱	Plumerane	吲哚类生物碱	C23H26N2O4	3	0.8447	357-57-3	2060.81	7248.85	1499.56	12140.2	19649.1	16819.9	1.22659	0.0123808	0.0574587	4.49701	2.16897	up
MW0137412	Arthonioic acid	连翘酸	Organic acids	有机酸	Organic acids	有机酸	C29H36O9	3	0.8135	25556-24-5	6337.91	5644.17	5641.97	28312.8	26682.2	27821.1	1.41567	4.69381e-05	0.00353838	4.69904	2.23237	up
MW0143306	4-Ethyl-7-hydroxy-3-(p-methoxyphenyl)coumarin	4-乙基-7-羟基-3-(对甲氧基苯基）香豆素	Lignans and Coumarins	木脂素和香豆素	Coumarins	香豆素	C18H16O4	3	0.799	5219-17-0	482930	462031	432640	1.14487e+06	1.17593e+06	1.27735e+06	1.41137	0.00108104	0.0151812	2.6119	1.3851	up
MW0141012	1-(2-Hydroxy-3,4,5,6-tetramethoxyphenyl)-3-(2,3,4,6-tetramethoxyphenyl)-2-propen-1-one	1-(2-羟基-3，4，5，6-四甲氧基苯基)-3-(2，3，4，6-四甲氧基苯基)-2-丙烯-1-酮	Others	其它类	Ketone compounds	酮类化合物	C23H28O10	3	0.7833	93827-71-5	17765.1	18505.4	18606.3	7875.09	6495.92	4700.27	1.36504	0.00347217	0.0278893	0.347529	-1.5248	down
MW0052783	Eurycomalactone	广麻内酯	Others	其它类	Ketone compounds	酮类化合物	C19H24O6	3	0.7766	23062-24-0	13626.4	17678.6	17468.8	4793.16	10816.9	8543.42	1.17072	0.0230528	0.0853584	0.495214	-1.01388	down
MW0153980	Multigilin	莫替吉林	Terpenoids	萜类	Sesquiterpenoids	倍半萜	C20H24O6	3	0.7704	64937-25-3	3383	2048.75	5231.96	13671.1	12904.1	8305.53	1.26387	0.0226161	0.0846575	3.27098	1.70972	up
MW0148157	Daphnoline	达夫诺林	Lignans and Coumarins	木脂素和香豆素	Lignans	木脂素	C35H36N2O6	3	0.7471	479-36-7	3897.13	5149.7	3731.38	1773.06	2045.04	1774.52	1.36772	0.0291334	0.0991957	0.437668	-1.19209	down
MW0000022	(+/-)-6-Acetonyldihydrochelerythrine	6-丙酮基二氢白屈菜红碱	Alkaloids	生物碱	Isoquinoline alkaloids	异喹啉类生物碱	C24H23NO5	3	0.7341	22864-92-2	1.32683e+06	1.39549e+06	1.33555e+06	642547	388751	414214	1.35801	0.00565322	0.0366839	0.356225	-1.48914	down
MW0148491	Yatein	Yatein	Lignans and Coumarins	木脂素和香豆素	Lignans	木脂素	C22H24O7	3	0.7293	40456-50-6	1418.47	1473.98	1589.9	3941.1	4185.5	2753.78	1.35449	0.0388705	0.119837	2.42738	1.2794	up
MW0140401	(3Z,6Z,9Z)-dodecatrienol	（3Z，6Z，9Z)-3，6，9-十二碳三烯-1-醇；（Z，Z，Z)-3，6，9-十二碳三烯-1-醇	Alcohol and amines	醇、胺类	Alcohols	醇类	C12H20O	3	0.7188	81345-02-0	25959	28258.8	28689	8165.99	7874.01	8325.89	1.41551	0.00151601	0.0182191	0.293895	-1.76663	down
MW0150566	Glycobismine A	甘氨双胺A	Heterocyclic compounds	杂环化合物	Heterocyclic compounds	杂环化合物	C37H34N2O6	3	0.7093	91147-20-5	1560.13	2311.45	951.57	5947.34	5743.19	4551.39	1.30509	0.00301388	0.0264456	3.36749	1.75167	up
MW0140607	(R)-Indenestrol A	(R)-茚地酮A	Benzene and substituted derivatives	苯及其衍生物	Benzene and substituted derivatives	苯及其衍生物	C18H18O2	3	0.7093	115217-03-3	39896	41449.7	34816.7	12591.3	22462.8	21732.5	1.25613	0.0098379	0.0498566	0.488856	-1.03252	down
MW0130714	2-amino-4-(4-methylphenyl)-4H-benzo[h]chromene-3-carbonitrile	2-氨基-4-(4-甲基苯基)-4H-苯并[h]色烯-3-甲腈	Benzene and substituted derivatives	苯及其衍生物	Benzene and substituted derivatives	苯及其衍生物	C21H16N2O	3	0.706	144464-54-0	7469.82	2439.64	6741.96	17218.3	15408.4	15381.7	1.20762	0.012831	0.0587515	2.88315	1.52764	up
MW0147323	Cellotetraose	纤维四糖	Others	其它类	Saccharides	糖类	C24H42O21	3	0.6987	38819-01-1	59061.6	66920	61584.9	9593.61	12106.4	5465.87	1.37818	7.45052e-05	0.00403361	0.144833	-2.78754	down
MW0169507	N-1-Naphthylbenzamide	N-(萘-1-基）苯甲酰胺	Benzene and substituted derivatives	苯及其衍生物	Benzene and substituted derivatives	苯及其衍生物	C17H13NO	3	0.6977	634-42-4	4189.43	3684.53	6992.53	12874	13898.7	16924.3	1.32436	0.0041475	0.0304712	2.93929	1.55547	up
MW0002093	2,2'-Dithiodibenzoic acid	2,2'-二硫代二苯甲酸	Benzene and substituted derivatives	苯及其衍生物	Benzene and substituted derivatives	苯及其衍生物	C14H10O4S2	3	0.694	119-80-2	7977.83	7063.19	523.4	13709.2	21969	25500.5	1.0135	0.02822	0.0970014	3.93068	1.97478	up
MW0112757	3-Benzoyl-6-phenyl-pyran-2,4-dione	3-苯甲酰基-6-苯基-2H-吡喃-2,4（3H)-二酮	Benzene and substituted derivatives	苯及其衍生物	Benzene and substituted derivatives	苯及其衍生物	C18H12O4	3	0.6935	602-98-2	9016.89	12174.9	12456.6	4411.98	5766.63	2655.41	1.26848	0.00905005	0.0475243	0.381416	-1.39056	down
MW0117338	1H-Benzimidazol-5-amine, 2-(4-thiazolyl)-	1H-Benzimidazol-5-amine, 2-(4-thiazolyl)-	Benzene and substituted derivatives	苯及其衍生物	Benzene and substituted derivatives	苯及其衍生物	C10H8N4S	3	0.6894	25893-06-5	1658.81	1247.46	1450.33	976.78	226.2	447.42	1.13078	0.0363968	0.114768	0.378828	-1.40039	down
MW0007763	Methyl 5-methanesulfonyl-2-nitrobenzoate	5-甲磺酰基-2-硝基苯甲酸甲酯	Benzene and substituted derivatives	苯及其衍生物	Benzene and substituted derivatives	苯及其衍生物	C9H9NO6S	3	0.6881	949033-22-1	15484.8	11448.2	12578.7	6508.59	6226.41	5920.84	1.37493	0.0266693	0.0933619	0.472159	-1.08265	down
MW0015702	alpha-Hederin	3-O-鼠李糖基(1→2)阿拉伯糖基-23-羟基齐墩果-12-烯-28-酸 (木通皂苷Stc;刺楸根皂苷A;无患子皂苷A)	Terpenoids	萜类	Triterpene Saponin	三萜皂苷	C41H66O12	3	0.6862	27013-91-8 | 104748-88-1	1220.26	2393.21	1517.05	9030.35	4752.36	9139.73	1.31946	0.0476396	0.137668	4.46786	2.15958	up
MW0005878	Naphth[1,2-d][1,2,3]oxadiazole-5-sulfonic acid, 7-nitro-	石脑油[1,2-d][1,2,3]oxadiazole-5-sulfonic acid, 7-nitro-	Benzene and substituted derivatives	苯及其衍生物	Benzene and substituted derivatives	苯及其衍生物	C10H5N3O6S	3	0.6861	84-91-3	1011.08	513.33	550.18	239.15	241.18	287.36	1.28237	0.111346	0.243157	0.370044	-1.43423	down
MW0143697	5'-Prenylhomoeriodictyol	5-异戊烯基高圣草酚；乙酰乙醇胺B3-甲醚	Flavonoids	黄酮	Flavones	黄酮	C21H22O6	3	0.6807	671781-82-1	121184	142786	110352	34104.4	53887.8	56846.9	1.32994	0.00390742	0.0293668	0.386938	-1.36983	down
MW0153842	Methyllycaconitine Perchlorate, Delphinium sp.	甲基乌头碱高氯酸盐，飞燕草 sp。	Alkaloids	生物碱	Terpenoid alkaloids	萜类生物碱	C37H50N2O10	3	0.6793	21019-30-7 | 1356-60-1	28.43	19.48	10.55	89.91	59.2	137.17	1.28381	0.0721532	0.18333	4.89702	2.29191	up
MW0103326	2-Amino-2'-deoxyadenosine	2-氨基-2'-脱氧腺苷	Nucleotides and derivatives	核苷酸及其衍生物	Nucleotides and derivatives	核苷酸及其衍生物	C10H14N6O3	3	0.6771	4546-70-7	703.42	1194.14	2093.98	10230.8	9754.4	9281.36	1.3567	0.000165884	0.00607748	7.33215	2.87424	up
MW0168245	Cularicine	苦来西碱	Alkaloids	生物碱	Alkaloids	生物碱	C18H17NO4	3	0.6752	2271-08-1	6227.67	8307.78	8357.24	14988.3	24853.1	20958.4	1.33056	0.0412375	0.124363	2.65586	1.40918	up
MW0061827	Pinolenic acid	松油酸	Lipids	脂质	Free fatty acids	游离脂肪酸	C18H30O2	3	0.6611	16833-54-8	26253.7	27352	26193.1	11465.4	11393.8	11289.6	1.41691	0.000499079	0.0105701	0.427937	-1.22453	down
MW0002106	2,3',4,6-Tetrahydroxybenzophenone	2，3，4，6-四羟基二苯甲酮	Flavonoids	黄酮	Other Flavonoids	其它类黄酮	C13H10O5	3	0.6609	26271-33-0	2862.48	26.69	32.87	13204.7	18526.8	11831.5	1.18478	0.0109491	0.0529299	14.9084	3.89806	up
MW0008524	Thionalide	硫磺内酯	Benzene and substituted derivatives	苯及其衍生物	Benzene and substituted derivatives	苯及其衍生物	C12H11NOS	3	0.6596	93-42-5	163489	132184	148507	45223.9	33342.1	50028.7	1.38523	0.00173023	0.0194459	0.28951	-1.78832	down
MW0147227	Cascaroside B	Cascaroside?B	Steroids	甾体	Steroid	甾体	C27H32O14	3	0.6581	53861-34-0	1.48836e+06	1.54527e+06	1.39607e+06	431409	544096	549272	1.40047	8.3795e-05	0.00426559	0.344216	-1.53861	down
MW0140331	(2S,5S)-5-Carboxymethylproline	（2S，5S)-反式羧甲基脯氨酸；（2S，5S)-5-羧甲基脯氨酸	Organic acids	有机酸	Organic acids	有机酸	C7H11NO4	3	0.6544	586409-91-8	3966.61	2938.34	3461.57	7708.6	7516.07	8532.94	1.38246	0.000494815	0.0105485	2.29176	1.19646	up
MW0141877	2-(4-Methoxyphenethyl)chromone	2-[2-(4-甲氧基)苯乙基]色酮	Others	其它类	Chromone	色酮类	C18H16O3	3	0.6536	92911-82-5	48898.4	50581	49553.6	15233.6	33091	22746.9	1.23262	0.0364357	0.114768	0.476884	-1.06829	down
MEDN1239	5-O-(1-carboxyvinyl) -3-phosphate	5-O-(1-羧基乙烯基)-3-磷酸酯	Organic acids	有机酸	Organic acids	有机酸	C10H13O10P	3	0.6509	89771-75-5	2137.22	3414.6	2603.49	972.21	493.51	192.48	1.24185	0.0125093	0.057728	0.203328	-2.29812	down
MW0150458	Gly-Phe-Tyr	甘氨酸-苯丙氨酸-酪氨酸	Amino acids and derivatives	氨基酸及其衍生物	Amino acids and derivatives	氨基酸及其衍生物	C20H23N3O5	3	0.6507	70421-71-5	7161.63	8112.84	5919.39	2526.54	3039.77	1950.63	1.35678	0.00821343	0.0448394	0.354675	-1.49543	down
MW0157273	Sucrose-6-phosphate	蔗糖-6-磷酸	Others	其它类	Saccharides	糖类	C12H23O14P	3	0.6458	22372-29-8	17252.1	55078.3	18621	77908.2	95039.8	108948	1.21125	0.0171044	0.0707437	3.09941	1.63199	up
MW0103015	7-[4,6-Dihydroxy-2-(3-hydroxyocta-1,5-dienyl)oxan-3-yl]hept-5-enoic acid	7-[4,6-Dihydroxy-2-(3-hydroxyocta-1,5-dienyl)oxan-3-yl]hept-5-enoic acid	Lipids	脂质	Free fatty acids	游离脂肪酸	C20H32O6	3	0.6457	71953-80-5	8740.08	9486.73	8448.63	2708.51	2425.95	2328.92	1.41218	0.000798858	0.0132167	0.279785	-1.83761	down
MW0106930	Glu-Tyr-Glu	谷氨酸-酪氨酸-谷氨酸	Amino acids and derivatives	氨基酸及其衍生物	Amino acids and derivatives	氨基酸及其衍生物	C19H25N3O9	3	0.6448	32140-46-8	1000.11	2453.33	773.24	6272.2	4752.83	6402.85	1.28205	0.00414551	0.0304712	4.1233	2.0438	up
MW0138805	Lobaric acid	洛巴酸	Organic acids	有机酸	Organic acids	有机酸	C25H28O8	3	0.6414	522-53-2	19307.6	23106.3	22216.1	82094.8	76834.3	76176.9	1.41178	6.09552e-05	0.0039633	3.63772	1.86303	up
MEDN1435	(±)5(6)-DiHETE	5，6-双羟基-7E,9E,11Z,14Z-二十碳四烯酸	Lipids	脂质	Free fatty acids	游离脂肪酸	C20H32O4	3	0.6397	845673-97-4	1259.26	4102.72	1012.99	12918.7	14199.4	12093	1.30095	0.00164258	0.0189843	6.15079	2.62077	up
MW0156445	Rugosinone	Rugosinone	Others	其它类	Ketone compounds	酮类化合物	C19H15NO6	3	0.639	73609-04-8	118717	112625	102593	38281.2	37187.9	41505.6	1.41032	0.00246284	0.0237295	0.350292	-1.51337	down
ZINC49889257	3,4,5-Tricaffeoylquinic acid	3,4,5-三咖啡酰奎宁酸	Phenolic acids	酚酸类	Phenolic acids	酚酸类	C34H30O15	3	0.6281	86632-03-3	32504.3	29762.9	22036.8	7790.14	9917.21	2119.96	1.21098	0.00668784	0.0400409	0.235188	-2.08811	down
MW0110069	Tryptophyl-leucyl-glutamic acid	Trp Leu Glu	Amino acids and derivatives	氨基酸及其衍生物	Amino acids and derivatives	氨基酸及其衍生物	C22H30N4O6	3	0.6273	116778-82-6	11309.7	9559.93	8164.8	25110.5	22578.7	23068.5	1.38439	0.000357909	0.00891619	2.43703	1.28512	up
MW0156350	Rehmaionoside C	地黄苷C	Terpenoids	萜类	Terpene	萜类	C19H32O8	3	0.6264	104112-05-2	63579.2	63438.1	60266.9	185453	180183	173876	1.41617	0.000282432	0.00781436	2.88072	1.52643	up
MW0153319	Magnoloside A	厚朴苷 A	Phenolic acids	酚酸类	Phenolic acids	酚酸类	C29H36O15	3	0.6193	113557-95-2	2134.93	603.21	2366.65	6452.98	5104.24	8813.61	1.20741	0.0253251	0.0904116	3.99053	1.99658	up
MW0126804	3',5'-Cyclic dtmp	3',5'-循环 dtmp	Organic acids	有机酸	Organic acids	有机酸	C10H13N2O7P	3	0.6168	6453-60-7	535.15	436.43	335.17	336.19	112.41	78.07	1.08525	0.0654205	0.171449	0.403038	-1.31101	down
MW0156619	Septentrionine	塞普坦特里奥宁	Terpenoids	萜类	Ditepenoids	二萜	C38H54N2O11	3	0.6141	70553-63-8	662.06	1507.81	1119.13	3598.78	6937.64	5074.36	1.32157	0.0439304	0.129842	4.74636	2.24682	up
MW0143503	eicosa-5Z,8Z,14Z-trienoic acid	eicosa-5Z,8Z,14Z-三烯酸	Lipids	脂质	Free fatty acids	游离脂肪酸	C20H34O2	3	0.614	90105-02-5	8490.65	7921.75	8657.97	2758.18	3187.16	3324.46	1.40673	7.66311e-05	0.00408406	0.369751	-1.43537	down
MW0152797	(2S)-3-[4-[2-(5-methyl-2-phenyl-1,3-oxazol-4-yl)ethoxy]phenyl]-2-[[(Z)-4-oxo-4-phenylbut-2-en-2-yl]amino]propanoic acid	(2S)-3-[4-[2-(5-methyl-2-phenyl-1,3-oxazol-4-yl)ethoxy]phenyl]-2-[[(Z)-4-oxo-4-苯基丁-2-烯-2-基]氨基]丙酸	Heterocyclic compounds	杂环化合物	Heterocyclic compounds	杂环化合物	C31H30N2O5	3	0.6039	258345-41-4	7197.8	8690.11	9617.21	761.65	1962.55	3100.63	1.25779	0.0025687	0.0242978	0.228379	-2.1305	down
MW0000522	(9bR)-2,6-diacetyl-7,9-dihydroxy-8,9b-dimethyldibenzo[b,d]furan-1,3(2H,9bH)-dione	(9bR)-2,6-diacetyl-7,9-dihydroxy-8,9b-dimethyldibenzo[b,d]furan-1,3(2H,9bH)-dione	Benzene and substituted derivatives	苯及其衍生物	Benzene and substituted derivatives	苯及其衍生物	C18H16O7	3	0.6023	6159-66-6	1646.07	582.44	1482.4	3129.4	8308.99	4736.75	1.22408	0.107153	0.237524	4.35881	2.12393	up
MW0016972	Cellobiotol	葡糖基-4-葡糖苷	Steroids	甾体	Steroid	甾体	C12H24O11	3	0.6016	535-94-4	514.13	933.21	606.3	2809.16	2206.2	2259.92	1.35796	0.00288338	0.0259664	3.54263	1.82482	up
MW0147061	Cannabisin E	大麻素E	Lignans and Coumarins	木脂素和香豆素	Lignans	木脂素	C36H38N2O9	3	0.596	163136-16-1	274.46	256.77	59.04	692.5	1562.18	371.22	1.07809	0.193069	0.351349	4.44864	2.15337	up
MW0147058	Cannabisin-b	大麻素B	Lignans and Coumarins	木脂素和香豆素	Lignans	木脂素	C34H32N2O8	3	0.5929	144506-17-2	1415.44	2695.45	3737.86	11202.8	4479.89	9044.14	1.16671	0.0925071	0.21675	3.15042	1.65554	up
MW0138437	Ichthynone	噻酮	Others	其它类	Ketone compounds	酮类化合物	C23H20O7	3	0.5921	24340-62-3	6107.47	6878.72	6422.44	1844.36	2735.4	2841.58	1.36125	0.000839875	0.0135404	0.382373	-1.38695	down
MW0157134	Sophoraisoflavanone A	槐花异黄酮A	Others	其它类	Ketone compounds	酮类化合物	C21H22O6	3	0.5893	69573-59-7	73067	83012.2	110947	425788	335483	322150	1.38604	0.00813438	0.04452	4.05736	2.02054	up
MW0159659	Cellotriose	纤维三糖	Others	其它类	Saccharides	糖类	C18H32O16	3	0.5847	9061-30-7	796.71	2523.6	918.74	4213.55	5515.75	9990.59	1.24188	0.0868625	0.207946	4.65196	2.21784	up
MW0147562	cis-Zeatin riboside monophosphate	顺式-玉米素核苷一磷酸	Nucleotides and derivatives	核苷酸及其衍生物	Nucleotides and derivatives	核苷酸及其衍生物	C15H22N5O8P	3	0.5793	125225-71-0	45228.7	33247.7	53887.9	21253.7	12528.1	22733.3	1.24562	0.032669	0.107064	0.426967	-1.2278	down
MW0153960	5'-Demethoxydeoxypodophyllotoxin	莫雷兰素；（-)-辣根素；5′-去甲氧基脱氧鬼臼毒素	Lignans and Coumarins	木脂素和香豆素	Lignans	木脂素	C21H20O6	3	0.5678	63700-40-3	42236.7	53877.8	70128.9	211366	186497	138417	1.34717	0.0186067	0.0745443	3.22588	1.68969	up
MW0159352	Vindoline	文多灵碱	Alkaloids	生物碱	Plumerane	吲哚类生物碱	C25H32N2O6	3	0.5671	2182-14-1 | 57794-53-3	89.38	276.42	159.26	111	24.98	18.2	1.05956	0.138086	0.282161	0.293643	-1.76787	down
MW0124403	Indirubin	靛玉红	Alkaloids	生物碱	Plumerane	吲哚类生物碱	C16H10N2O2	3	0.5652	479-41-4	76190.4	72430.3	72580.3	34766.6	36866.9	34528	1.414	5.8357e-05	0.00391172	0.479932	-1.0591	down
MEDN1868	2-{4-[(N-phenylpentanamido)methyl]phenyl}benzoic acid	2-{4-[(N-苯基五氨基)甲基]苯基}苯甲酸	Benzene and substituted derivatives	苯及其衍生物	Benzene and substituted derivatives	苯及其衍生物	C25H25NO3	3	0.5329	862891-27-8	2603.23	2932.83	4014.17	1282.16	1803.03	297.2	1.05505	0.0286105	0.0981148	0.354168	-1.49749	down
MW0117270	Pac-1	PAC-1	GP	甘油磷脂类	PA	磷脂酸	C23H28N4O2	3	0.5217	315183-21-2	1.58827e+06	1.75774e+06	1.54089e+06	775354	771684	682635	1.40264	0.00160274	0.0186422	0.456254	-1.13209	down
MEDP0585	FFA(18:4)	十八碳四烯酸	Lipids	脂质	Free fatty acids	游离脂肪酸	C18H28O2	3	0.52	2012-14-8	1701.64	2777.64	2371	7332.03	7100.85	6292.57	1.36879	0.000482394	0.010542	3.02549	1.59717	up
MW0147244	Cassinine	卡西宁	Benzene and substituted derivatives	苯及其衍生物	Benzene and substituted derivatives	苯及其衍生物	C44H51NO17	3	0.5043	62948-58-7	459.26	900.56	308.99	1640.69	1175.6	1917.68	1.20862	0.0232496	0.0858603	2.83673	1.50423	up
MW0138677	kaempferol 3-O-beta-D-glucopyranosyl-7-O-alpha-L-rhamnopyranoside	山奈酚3-O-BETA-D-吡喃葡萄糖基-7-O-ALPHA-L-吡喃鼠李糖苷	Flavonoids	黄酮	Flavonols	黄酮醇	C27H30O15	2	0.9064	-	740.62	1583.75	779.92	367.27	285.83	559.91	1.16917	0.139689	0.284453	0.390753	-1.35567	down
MW0130429	2',4'-Dihydroxychalcone 4'-glucoside	2'，4'-二羟基查耳酮4'-葡糖苷	Others	其它类	Ketone compounds	酮类化合物	C21H22O8	2	0.8221	-	3943.55	4467.9	11631.3	39295.8	29021	35538.8	1.31569	0.00227995	0.0226324	5.18169	2.37342	up
MW0137517	(1E,4Z,6E)-5-hydroxy-1,7-bis(4-hydroxyphenyl)hepta-1,4,6-trien-3-one	双去甲氧基姜黄素	Phenolic acids	酚酸类	Phenolic acids	酚酸类	C19H16O4	2	0.7369	-	18424.7	11094.7	8514.35	39792.1	38674.1	21781.1	1.21201	0.0510602	0.143845	2.63575	1.39821	up
MW0126734	Tetrahydrogambogic acid	四氢葡萄糖酸	Organic acids	有机酸	Organic acids	有机酸	C38H48O8	2	0.7364	-	309.41	55.3	711.84	760.72	2172.1	1262.8	1.02983	0.112158	0.244401	3.89728	1.96247	up
MW0111868	1-phospho-alpha-D-galacturonic acid	1-磷酸-α-D-半乳糖醛酸; D-半乳糖醛酸1-磷酸	Organic acids	有机酸	Organic acids	有机酸	C6H11O10P	2	0.7067	-	24995.3	25000.2	25104.7	869.54	7119.88	6337.2	1.17044	0.00927004	0.0482963	0.190767	-2.39012	down
ZINC85996581	2-[[2-(2,4-dihydroxyphenyl)-7-[(2E)-3,7-dimethylocta-2,6-dienyl]-5,6-dihydroxy-1-benzofuran-3-yl]methyl]-6H-[1]benzofuro[3,2-c]chromene-3,9-diol	2-[[2-(2，4-二羟基苯基)-7-[（2E)-3，7-二甲基辛-2，6-二烯基]-5，6-二羟基-1-苯并呋喃-3-基]甲基]-6H-[1]苯并呋喃[3，2-c]苯并吡喃-3，9-二醇	Benzene and substituted derivatives	苯及其衍生物	Benzene and substituted derivatives	苯及其衍生物	C40H36O9	3	0.9612	-	2282.03	5527.4	6432.1	24858.4	24709.7	8719.46	1.17219	0.104296	0.233116	4.09278	2.03308	up
MEDN1231	1-O-vanillyl-β-D-glucose	1-O-香草基-β-D-葡萄糖	Benzene and substituted derivatives	苯及其衍生物	Benzene and substituted derivatives	苯及其衍生物	C14H18O9	3	0.9177	-	8105.04	9078.96	6070.39	36717.9	33536.8	35208.1	1.39987	2.81367e-05	0.00281454	4.53518	2.18116	up
MW0165492	[(2S)-1-[(9Z,12Z,15Z)-octadeca-9,12,15-trienoyl]oxy-3-[(2R,3R,4S,5R,6R)-3,4,5-trihydroxy-6-(hydroxymethyl)oxan-2-yl]oxypropan-2-yl] (9Z,12Z)-octadeca-9,12-dienoate	[(2S)-1-[(9Z,12Z,15Z)-octadeca-9,12,15-trienoyl]oxy-3-[(2R,3R,4S,5R,6R)-3,4,5-trihydroxy-6-(hydroxymethyl)oxan-2-yl]oxypropan-2-yl] (9Z,12Z)-octadeca-9,12-dienoate	GL	甘油脂类	TG	甘油三酯	C45H76O10	3	0.9162	-	19546.9	36813.8	1595.75	262.1	681.65	220.17	1.21759	0.203636	0.363649	0.0200827	-5.6379	down
MW0150380	Gly-His-Val	甘氨酸-组氨酸-缬氨酸	Amino acids and derivatives	氨基酸及其衍生物	Amino acids and derivatives	氨基酸及其衍生物	C13H21N5O4	3	0.907	-	2658.51	1322.95	568.21	6955.9	5939.12	4861.04	1.21831	0.00688897	0.04054	3.90271	1.96448	up
MW0154008	[(6S,7S,9E,12R)-12-[(E,2S,6R,7R,9R)-7,9-dihydroxy-4,6-dimethyldec-4-en-2-yl]-7,9-dimethyl-2-oxo-1-oxacyclododec-9-en-6-yl] (2E,4E,6E,8E,10E)-12,13,15-trihydroxy-2,4,6,10-tetramethylhexadeca-2,4,6,8,10-pentaenoate	[(6S,7S,9E,12R)-12-[(E,2S,6R,7R,9R)-7,9-dihydroxy-4,6-dimethyldec-4-en-2-yl]-7,9-dimethyl-2-oxo-1-oxacyclododec-9-en-6-yl] (2E,4E,6E,8E,10E)-12,13,15-trihydroxy-2,4,6,10-tetramethylhexadeca-2,4,6,8,10-pentaenoate	FA	脂肪酰类	Others	其它	C45H72O9	3	0.8747	-	64652.7	45637.3	64137.4	101792	101433	147302	1.27494	0.0457482	0.133627	2.00959	1.0069	up
MW0000767	[(2R,3S,4S,5R,6S)-3,4,5-trihydroxy-6-[(6Z)-1-hydroxy-6-(2-hydroxy-2-methylpropylidene)-2,2,4,4-tetramethyl-3,5-dioxocyclohexyl]oxyoxan-2-yl]methyl 3,4,5-trihydroxybenzoate	[(2R,3S,4S,5R,6S)-3,4,5-三羟基-6-[(6Z)-1-羟基-6-(2-羟基-2-甲基亚丙基)-2,2,4, 4-四甲基-3,5-二氧代环己基]氧代-2-基]甲基3,4,5-三羟基苯甲酸酯	Benzene and substituted derivatives	苯及其衍生物	Benzene and substituted derivatives	苯及其衍生物	C27H36O14	3	0.8404	-	6795.21	5678.84	7380.78	18798.9	19445	14345.1	1.37409	0.0144142	0.0635806	2.64868	1.40527	up
MW0148576	Dioncophylline C	Dioncophylline C	Heterocyclic compounds	杂环化合物	Heterocyclic compounds	杂环化合物	C23H25NO3	3	0.8271	-	2738.32	1048.09	2114.28	13860.5	13533.1	12425.3	1.36129	7.50641e-05	0.00403361	6.74818	2.7545	up
MEDN1229	5-Oxo-4,5-dihydro-2-furylacetic acid	2-氧-2,3-二氢呋喃-5-乙酸盐	Organic acids	有机酸	Organic acids	有机酸	C6H6O4	3	0.7858	-	369.09	184.3	245.57	907.65	1109.22	1385.9	1.35059	0.0147774	0.0645953	4.259	2.09051	up
MW0110087	Trp-Val-Asn	色氨酸-缬氨酸-天冬酰胺	Amino acids and derivatives	氨基酸及其衍生物	Amino acids and derivatives	氨基酸及其衍生物	C20H27N5O5	3	0.7829	-	14788.4	15743.9	15683.3	35565.8	34307.1	34260.8	1.41534	8.29624e-06	0.00168569	2.25322	1.17199	up
MEDN1245	2-Benzylmalate	2-苄基苹果酸	Organic acids	有机酸	Organic acids	有机酸	C11H12O5	3	0.779	-	191564	201124	400529	100276	121060	86555.7	1.22969	0.137982	0.282037	0.388155	-1.36529	down
MW0143027	3-Methoxy-8,9-methylenedioxy-3,4-dihydrophenanthridine	3-甲氧基-8,9-亚甲二氧基-3,4-二氢菲啶; 3-甲氧基-3,4-二氢-[1,3]-二恶唑-[4,5-j]-菲啶	Heterocyclic compounds	杂环化合物	Heterocyclic compounds	杂环化合物	C15H13NO3	3	0.7653	-	169613	185398	173563	69761.2	34634.8	71201.3	1.3104	0.00469278	0.0326686	0.332209	-1.58984	down
MW0143186	4,4'-Diapolycopenedial	4，4-二聚戊二烯二醛	Others	其它类	Aldehyde compounds	醛类化合物	C30H36O2	3	0.764	-	17886	29180.4	31801	69405.7	68221.6	46233.7	1.25843	0.0246433	0.0889183	2.33127	1.22112	up
MW0148612	(2z,6z,10z,14z,18z,22e,26e)-3,7,11,15,19,23,27,31-Octamethyldotriaconta-2,6,10,14,18,22,26,30-Octaen-1-Yl Trihydrogen Diphosphate	二反式，聚顺-辛二烯基二磷酸酯；二磷酸五聚辛二烯酯	Organic acids	有机酸	Organic acids	有机酸	C40H68O7P2	3	0.7428	-	50.4	438.92	2432.32	5941.94	5591.67	8178.82	1.10999	0.00711174	0.0413968	6.74704	2.75426	up
MW0125427	N-(Piperidin-4-yl)-N-propylthiophene-2-carboxamide	N-(哌啶-4-基)-N-丙基噻吩-2-甲酰胺	Alcohol and amines	醇、胺类	Amines	胺类	C13H20N2OS	3	0.7276	-	10524.3	9720.46	8973.87	21513.7	20383.1	21802	1.40618	5.11582e-05	0.00361555	2.18007	1.12438	up
MW0161375	2-amino-2-deoxy-beta-D-glucopyranosyl-(1->4)-2-amino-2-deoxy-beta-D-glucopyranosyl-(1->4)-2-amino-2-deoxy-D-glucopyranose	2-氨基-2-脱氧-β-D-吡喃葡萄糖基-(1->4)-2-氨基-2-脱氧-β-D-吡喃葡萄糖基-(1->4)-2-氨基-2-脱氧- D-吡喃葡萄糖	Alcohol and amines	醇、胺类	Alcohols	醇类	C18H35N3O13	3	0.7254	-	74991.9	69666.1	68547.5	11841.4	12689.3	13270.3	1.416	0.000755588	0.0128843	0.177299	-2.49575	down
MW0164938	beta1-Tomatine	β1-番茄碱	Alkaloids	生物碱	Steroid alkaloids	甾体类生物碱	C45H75NO17	3	0.7237	-	33168.3	29546.3	17771.9	10934.8	8714.01	4633.51	1.2558	0.0418676	0.125738	0.301694	-1.72884	down
MW0144035	8-C-Glucosylnaringenin	8-C-葡萄糖基柚皮素	Flavonoids	黄酮	Flavones	黄酮	C21H22O10	3	0.7139	-	16952.2	18562.2	16012	4705.53	7292.9	2674.83	1.29755	0.00343892	0.0278801	0.284772	-1.81212	down
MW0154253	N-Adenylyl-L-phenylalanine	N-腺苷基-L-苯丙氨酸	Nucleotides and derivatives	核苷酸及其衍生物	Nucleotides and derivatives	核苷酸及其衍生物	C19H23N6O8P	3	0.7126	-	63202.1	57840.6	67493.7	168926	159516	154849	1.40935	0.000102397	0.0045602	2.56338	1.35805	up
MW0165295	N(alpha)-(L-gamma-glutamyl)-hercynyl-L-cysteine sulfoxide(1-)	N(α)-(L-γ-谷氨酰)-海氰基-L-半胱氨酸亚砜(1-)	Others	其它类	Lactones	内酯类化合物	C17H26N5O8S-	3	0.7088	-	1118.8	3054.03	2773.8	6227.74	4656.05	5520.8	1.1598	0.0163254	0.0684963	2.36152	1.23971	up
MW0131127	Irigenin, dibenzyl ether	鸢尾素、二苄基醚	Flavonoids	黄酮	Isoflavones	异黄酮	C32H28O8	3	0.7083	-	49349.3	45037.4	46799.6	20549.2	18363.1	11372.3	1.34007	0.00291886	0.0260866	0.356158	-1.48941	down
MW0149127	Farnesyl triphosphate	法呢基三磷酸酯	Organic acids	有机酸	Organic acids	有机酸	C15H29O10P3	3	0.7056	-	198056	215016	214552	99251	100313	99601.5	1.41401	0.00251876	0.0240132	0.476664	-1.06896	down
MW0140185	(10aS)-10,10a-dihydrophenazine-1-carboxylic acid	（10aS)-10,10a-二氢吩嗪-1-羧酸盐	Organic acids	有机酸	Organic acids	有机酸	C13H10N2O2	3	0.7013	-	177133	133285	183097	42909.1	98615.5	97681.4	1.13382	0.0258539	0.0917087	0.484699	-1.04484	down
MW0010507	(2S,3R,4R,5R,6S)-2-[(2S,3R,4S,5S,6R)-4,5-dihydroxy-2-[4-[3-(4-hydroxy-3,5-dimethoxyphenyl)-1,3,3a,4,6,6a-hexahydrofuro[3,4-c]furan-6-yl]-2,6-dimethoxyphenoxy]-6-(hydroxymethyl)oxan-3-yl]oxy-6-methyloxane-3,4,5-triol	(2S,3R,4R,5R,6S)-2-[(2S,3R,4S,5S,6R)-4,5-二羟基-2-[4-[3-(4-羟基-3,5-) dimethoxyphenyl)-1,3,3a,4,6,6a-hexahydrofuro[3,4-c]furan-6-yl]-2,6-dimethoxyphenoxy]-6-(hydroxymethyl)oxan-3-yl]oxy- 6-甲基恶烷-3,4,5-三醇	Lignans and Coumarins	木脂素和香豆素	Lignans	木脂素	C34H46O17	3	0.6974	-	134446	110472	222562	456097	453740	446572	1.32685	0.0125098	0.057728	2.90154	1.53682	up
MW0154154	N3'-Acetylneomycin	N3'-乙酰新霉素	Alcohol and amines	醇、胺类	Polyamines	多胺	C25H48N6O14	3	0.6836	-	6975.07	5107.24	4479.36	21208.8	18856.7	19104.4	1.38719	0.000177888	0.00617814	3.5727	1.83701	up
MW0109311	Pro-Gln-Lys	脯氨酰-谷氨酰胺-赖氨酸	Amino acids and derivatives	氨基酸及其衍生物	Amino acids and derivatives	氨基酸及其衍生物	C16H29N5O5	3	0.6727	-	219198	241261	208763	88691.3	94135.9	93276.6	1.40999	0.00429533	0.0310314	0.412574	-1.27727	down
MW0151530	Ile-Met-Tyr	L-异亮氨酸-L-蛋氨酸-L-酪氨酸	Amino acids and derivatives	氨基酸及其衍生物	Amino acids and derivatives	氨基酸及其衍生物	C20H31N3O5S1	3	0.672	-	911.03	1700.98	1610.21	4939.16	3768.69	7767.84	1.3024	0.0693526	0.179149	3.90214	1.96427	up
MW0140356	2-Amino-3-hydroxy-4-methylbenzoyl-AMP	（3-羟基-4-甲基邻苯二甲酰基）腺苷酸; 3-羟基-4-甲基蒽基-AMP; 2-氨基-3-羟基-4-甲基苯甲酰基-AMP	Nucleotides and derivatives	核苷酸及其衍生物	Nucleotides and derivatives	核苷酸及其衍生物	C18H21N6O9P	3	0.6712	-	31318.8	33904.7	30821.1	11315.8	14840.8	18120.1	1.33713	0.00479383	0.0330886	0.461001	-1.11716	down
MW0145983	Asn-Leu-OH	天冬酰胺亮氨酸	Amino acids and derivatives	氨基酸及其衍生物	Amino acids and derivatives	氨基酸及其衍生物	C15H19N3O7	3	0.6617	-	26254.2	25785.1	28255.6	2705.34	8810.17	3299.22	1.31621	0.00343205	0.0278801	0.184504	-2.43828	down
MW0154781	Osthenol-7-O-beta-D-gentiobioside	Osthenol-7-O-BETA-D-龙胆二糖苷	Benzene and substituted derivatives	苯及其衍生物	Benzene and substituted derivatives	苯及其衍生物	C26H34O13	3	0.6606	-	1479.04	1177.65	2972.5	4421.7	3656.08	5758.93	1.19372	0.0302713	0.101855	2.45803	1.2975	up
MW0151848	Isoorientin 2''-O-rhamnoside	异荭草素-2''-O-鼠李糖苷	Flavonoids	黄酮	Flavones	黄酮	C27H30O15	3	0.6443	-	47033.5	33516.8	37527.9	9517.45	25425	23489.7	1.08181	0.0386545	0.119284	0.494861	-1.01491	down
MW0166987	OxIAA-aspartate-beta-glucose	OxIAA-aspartate-beta-glucose	Nucleotides and derivatives	核苷酸及其衍生物	Nucleotides and derivatives	核苷酸及其衍生物	C20H22N2O11-2	3	0.6382	-	2598.75	1571.5	2175	8649	10986	18805.1	1.35468	0.0721047	0.183278	6.0581	2.59886	up
MW0144050	8-Epideoxyloganin tetraacetate	8-表脱氧马钱子素四乙酸酯	Others	其它类	Lactones	内酯类化合物	C25H34O13	3	0.6245	-	33214.7	40378.8	32492.9	7765.4	10139	13510	1.36479	0.00212768	0.0217948	0.296121	-1.75574	down
MW0151583	Ile-Ser-Thr	L-异亮氨酸-L-丝氨酸-L-苏氨酸	Amino acids and derivatives	氨基酸及其衍生物	Amino acids and derivatives	氨基酸及其衍生物	C13H25N3O6	3	0.6234	-	1031.76	1382.69	973.01	338.97	187.24	162.78	1.35581	0.0101031	0.0505965	0.203394	-2.29765	down
ZINC14442034	2-[(2R,3R)-2,3-Dihydro-2-(4-hydroxy-3-methoxyphenyl)-3-(hydroxymethyl)-1,4-benzodioxin-6-yl]-5,7-dihydroxy-4H-1-benzopyran-4-one	5，7-二羟基-2-[（2R，3R)-2-(4-羟基-3-甲氧基苯基)-3-(羟甲基)-2，3-二氢-1，4-苯并二恶英-6-基]苯并吡喃-4-酮	Lignans and Coumarins	木脂素和香豆素	Lignans	木脂素	C25H20O9	3	0.6225	-	453.16	212.23	739.95	98.45	67.12	185.66	1.16574	0.141577	0.286968	0.249925	-2.00043	down
MW0138914	Medicarpin 3-O-glucoside-6'-malonate	美迪紫檀素-3-O-葡萄糖苷-6'-丙二酰基	Flavonoids	黄酮	Other Flavonoids	其它类黄酮	C25H26O12	3	0.6053	-	2150.66	1538.01	3616.64	7356.21	5553.65	3811.31	1.14355	0.0715127	0.182272	2.28891	1.19466	up
MW0110083	Trp-Thr-Lys	色氨酸-苏氨酸-赖氨酸	Amino acids and derivatives	氨基酸及其衍生物	Amino acids and derivatives	氨基酸及其衍生物	C21H31N5O5	3	0.6037	-	26134.1	22606.8	26892.8	4605.25	7565.33	3553.22	1.36437	0.000381391	0.00932257	0.207894	-2.26608	down
MW0106903	Glu-Gly-Trp	谷氨酸-甘氨酸-色氨酸	Amino acids and derivatives	氨基酸及其衍生物	Amino acids and derivatives	氨基酸及其衍生物	C18H22N4O6	3	0.6023	-	11790.9	14205.6	13995.5	51547	48993.4	49468.2	1.41159	4.84937e-06	0.00144509	3.75096	1.90726	up
MW0141825	1-Palmitoyl-2-(5-keto-6-octendioyl)-sn-glycero-3-phosphatidylcholine	1-棕榈酰基-2-(5-酮基-6-辛烯二酰基)-sn-甘油-3-磷脂酰胆碱	GP	甘油磷脂类	PC	磷脂酰胆碱	C32H58NO11P	3	0.5879	-	15961.6	12576	27683	79243.9	82587.5	67783.1	1.34601	0.000837704	0.0135404	4.08417	2.03004	up
MW0164180	sn-3-O-(geranylgeranyl)glycerol 1-phosphate(2-)	sn-3-O-(香叶基香叶基)甘油1-磷酸(2-)	Organic acids	有机酸	Organic acids	有机酸	C23H39O6P-2	3	0.5838	-	1884.52	2250.27	2023.89	1039.91	914.23	918.9	1.39668	0.00435645	0.0313831	0.466503	-1.10004	down
MW0148714	dTDP-3-acetamido-3,6-dideoxy-alpha-D-galactopyranose	DTDP-3-乙酰氨基-3，6-二脱氧-α-D-吡喃半乳糖	Nucleotides and derivatives	核苷酸及其衍生物	Nucleotides and derivatives	核苷酸及其衍生物	C18H29N3O15P2	3	0.5772	-	16306.9	16119.8	16246.9	1334.99	4419.25	5187.18	1.25767	0.00853428	0.0458594	0.224792	-2.15334	down
MW0014064	Ncgc00380776-01_C16H24O7_	Ncgc00380776-01_C16H24O7_	Organic acids	有机酸	Organic acids	有机酸	C16H24O7	3	0.5457	-	976.72	1041.15	1105.1	4031.59	5734.52	1337.02	1.10934	0.173199	0.328608	3.55531	1.82998	up
MW0118836	2-phenyl-N-(1-phenylethyl)quinoline-4-carboxamide	2-苯基-N-(1-苯乙基)喹啉-4-甲酰胺	Alcohol and amines	醇、胺类	Amines	胺类	C24H20N2O	3	0.5372	-	5442.19	7091.93	8609.17	1458.21	1115.33	2537.27	1.3268	0.0151332	0.0655052	0.241723	-2.04858	down
MW0010930	NCGC00384765-01_C20H32O9_(1beta,2alpha,4xi,5xi,9xi,11alpha,12alpha,13xi,15beta)-1,2,4,11,12,14,15-Heptahydroxypicrasan-16-one	NCGC00384765-01_C20H32O9_(1beta,2alpha,4xi,5xi,9xi,11alpha,12alpha,13xi,15beta)-1,2,4,11,12,14,15-Heptahydroxypicrasan-16-one	Others	其它类	Ketone compounds	酮类化合物	C20H32O9	3	0.5366	-	2109.23	2428.22	1770.58	3634.44	6227.1	3917.67	1.26645	0.0868131	0.207904	2.18439	1.12723	up
MW0149739	Gln-Leu-Glu-Lys	谷酰氨-亮氨酸-谷氨酸-赖氨酸	Amino acids and derivatives	氨基酸及其衍生物	Amino acids and derivatives	氨基酸及其衍生物	C22H40N6O8	2	0.8984	-	178.49	132.47	168.7	892.59	495.21	833.54	1.36692	0.041056	0.124046	4.63107	2.21135	up
MW0149981	Glu-Gln-Phe-Arg	古氨酸-谷酰胺-苯丙氨酸-精氨酸	Amino acids and derivatives	氨基酸及其衍生物	Amino acids and derivatives	氨基酸及其衍生物	C25H38N8O8	2	0.8945	-	220368	235938	228778	86390.9	91138.2	85537.7	1.41536	0.000250322	0.00723374	0.383992	-1.38085	down
MW0157680	Thr-Ile-Gln-Asp	Thr-Ile-Gln-Asp	Amino acids and derivatives	氨基酸及其衍生物	Amino acids and derivatives	氨基酸及其衍生物	C19H33N5O9	2	0.8819	-	6420.4	8670.19	10841.7	3702.39	4055.46	4221.7	1.30883	0.0657759	0.171964	0.461955	-1.11418	down
MW0146256	Asp-Ser-Glu-Asp	Asp-Ser-Glu-Asp	Amino acids and derivatives	氨基酸及其衍生物	Amino acids and derivatives	氨基酸及其衍生物	C16H24N4O12	2	0.8759	-	94735	82983.6	90426	31948.6	32701.4	52630.7	1.32017	0.00727711	0.0418724	0.437378	-1.19305	down
MW0150099	Glu-Phe-Asp-Glu	谷氨酸-苯丙氨酸-天门冬氨酸-谷氨酸	Amino acids and derivatives	氨基酸及其衍生物	Amino acids and derivatives	氨基酸及其衍生物	C23H30N4O11	2	0.8671	-	7699.76	3622.58	9545.98	2123.49	2119.26	1332.61	1.25509	0.0972639	0.224577	0.267169	-1.90418	down
MW0154407	Neu5Ac2-8Neu5Ac2-3Gal1-4GlcSp	Neu5Ac2-8Neu5Ac2-3Gal1-4GlcSp	Others	其它类	Saccharides	糖类	C36H59N5O27	2	0.8592	-	5896.18	2172.31	2701.24	1537.89	1376.89	1253.18	1.14933	0.198509	0.356845	0.387007	-1.36957	down
MW0157564	Thr-Asn-Ala-Asp	Thr-Asn-Ala-Asp	Amino acids and derivatives	氨基酸及其衍生物	Amino acids and derivatives	氨基酸及其衍生物	C15H25N5O9	2	0.8055	-	201.68	56.34	291.84	946.32	1610.99	373.37	1.12606	0.152355	0.301923	5.32987	2.4141	up
MW0151084	His-Ser-Lys-Lys	His-Ser-Lys-Lys	Amino acids and derivatives	氨基酸及其衍生物	Amino acids and derivatives	氨基酸及其衍生物	C21H38N8O6	2	0.7913	-	2555.87	250.25	685.79	5299.25	3536.5	3960.53	1.10777	0.0279506	0.0963599	3.66455	1.87364	up
MW0159193	Val-Thr-Tyr-Lys	Val-Thr-Tyr-Lys	Amino acids and derivatives	氨基酸及其衍生物	Amino acids and derivatives	氨基酸及其衍生物	C24H39N5O7	2	0.7905	-	115.21	246.68	749.26	805.06	2448.13	919.61	1.0676	0.18506	0.341738	3.75539	1.90896	up
MW0145749	Asn-Glu-Tyr-Glu	Asn-Glu-Tyr-Glu	Amino acids and derivatives	氨基酸及其衍生物	Amino acids and derivatives	氨基酸及其衍生物	C23H31N5O11	2	0.7807	-	6401.16	11548.5	9379.94	18887.2	19132.1	19508.9	1.2938	0.0200176	0.0783118	2.10497	1.0738	up
MW0149384	Gal1-3Gal1-4GlcSp	Gal1-3Gal1-4GlcSp	Others	其它类	Saccharides	糖类	C20H35N3O16	2	0.7723	-	5123.96	4010.11	12498.4	25718.3	18456.9	10886.5	1.0786	0.104856	0.234165	2.54532	1.34785	up
MW0144217	Abu-Val-OH	Abu-Val-OH	Amino acids and derivatives	氨基酸及其衍生物	Amino acids and derivatives	氨基酸及其衍生物	C14H18N2O6	2	0.7665	-	8252.9	20385.3	3069.54	74306.4	58322.5	57612.2	1.24944	0.00215264	0.0219086	5.99983	2.58492	up
MW0156803	Ser-Ile-Phe-Glu	Ser-Ile-Phe-Glu	Amino acids and derivatives	氨基酸及其衍生物	Amino acids and derivatives	氨基酸及其衍生物	C23H34N4O8	2	0.765	-	2520.76	8892.87	4552.82	52537	56761.3	60004.9	1.36005	6.6562e-05	0.00401875	10.6037	3.40649	up
MW0158969	Val-Gln-Ile-Asp	Val-Gln-Ile-Asp	Amino acids and derivatives	氨基酸及其衍生物	Amino acids and derivatives	氨基酸及其衍生物	C20H35N5O8	2	0.7641	-	7992.9	4562.82	9139.67	2537	1996.29	1216.81	1.28985	0.0520036	0.145744	0.265038	-1.91573	down
MW0145924	Asn-Tyr-Arg-Asp	Asn-Tyr-Arg-Asp	Amino acids and derivatives	氨基酸及其衍生物	Amino acids and derivatives	氨基酸及其衍生物	C23H34N8O9	2	0.7639	-	18893.7	25319.5	19399.2	8915.69	11595.1	6222.24	1.28932	0.0106536	0.0520825	0.420249	-1.25068	down
MW0150895	His-Gln-Asn-Glu	组氨酸-谷酰胺-天门冬酰氨-谷氨酸	Amino acids and derivatives	氨基酸及其衍生物	Amino acids and derivatives	氨基酸及其衍生物	C20H30N8O9	2	0.7632	-	31171.8	33624.2	22822.3	75569.3	69558.1	68672	1.36881	0.000877374	0.0137111	2.44012	1.28695	up
MW0145857	Asn-Phe-His-Asp	Asn-Phe-His-Asp	Amino acids and derivatives	氨基酸及其衍生物	Amino acids and derivatives	氨基酸及其衍生物	C23H29N7O8	2	0.7616	-	35730.6	29680.1	30729.8	188622	176883	179223	1.41442	4.2427e-05	0.00344825	5.66596	2.50232	up
MW0158314	Trp-TyrMe-OH	Trp-TyrMe-OH	Amino acids and derivatives	氨基酸及其衍生物	Amino acids and derivatives	氨基酸及其衍生物	C27H25N3O7	2	0.7605	-	6163.06	4437.63	6026.59	11835.6	20803.9	6459.45	1.03521	0.213646	0.376151	2.3515	1.23358	up
MW0151584	Ile-Ser-Thr-Glu	Ile-Ser-Thr-Glu	Amino acids and derivatives	氨基酸及其衍生物	Amino acids and derivatives	氨基酸及其衍生物	C18H32N4O9	2	0.7597	-	5340.87	4822.71	4636.95	1213.59	1929.56	965.01	1.35208	0.000883615	0.0137118	0.277568	-1.84908	down
MW0146101	Asp-Glu-Ile-Asp	Asp-Glu-Ile-Asp	Amino acids and derivatives	氨基酸及其衍生物	Amino acids and derivatives	氨基酸及其衍生物	C19H30N4O11	2	0.758	-	34837.8	55421.4	54705.6	116698	105729	103632	1.32606	0.00335009	0.0276796	2.24923	1.16943	up
MW0158710	TyrMe-Phe-OH	TyrMe-Phe-OH	Amino acids and derivatives	氨基酸及其衍生物	Amino acids and derivatives	氨基酸及其衍生物	C25H24N2O7	2	0.75	-	375.13	1008.93	1175.01	2245.07	2708.86	1646.77	1.13721	0.0286393	0.0981617	2.57934	1.367	up
MW0149611	Gln-Ala-Glu-Asp	谷酰氨-丙氨酸-谷氨酸-天冬氨酸	Amino acids and derivatives	氨基酸及其衍生物	Amino acids and derivatives	氨基酸及其衍生物	C17H27N5O10	2	0.7483	-	55822.5	48956.7	45800.2	124454	114797	122504	1.40344	7.26565e-05	0.00401875	2.40242	1.26449	up
MW0154401	Neu5Ac2-3LacDiNAcSp	Neu5Ac2-3LacDiNAcSp	Others	其它类	Saccharides	糖类	C29H48N6O19	2	0.7344	-	6655.37	3118.43	2590.39	27581.4	20175.2	20087.8	1.34038	0.0071022	0.041394	5.48717	2.45606	up
MW0157877	Thr-Abu-OH	Thr-Abu-OH	Amino acids and derivatives	氨基酸及其衍生物	Amino acids and derivatives	氨基酸及其衍生物	C14H18N2O7	2	0.7307	-	28406.9	22439.8	26164	8892.01	11463.9	13293	1.3481	0.0035001	0.0278893	0.436938	-1.1945	down
MW0146074	Asp-Gln-Ala-Asp	Asp-Gln-Ala-Asp	Amino acids and derivatives	氨基酸及其衍生物	Amino acids and derivatives	氨基酸及其衍生物	C16H25N5O10	2	0.7153	-	2199.18	3529	8318.53	16420.9	18152.7	10611.3	1.1874	0.0259187	0.0918884	3.21675	1.68561	up
MW0158606	Tyr-Ser-His-Glu	酪氨酸-丝氨酸-组氨酸-谷氨酸	Amino acids and derivatives	氨基酸及其衍生物	Amino acids and derivatives	氨基酸及其衍生物	C23H30N6O9	2	0.7129	-	44209.2	55576.7	33995.4	13913.9	21080.2	17204.7	1.31726	0.0378593	0.117893	0.390179	-1.35779	down
MW0151043	His-Phe-Glu-Asp	组氨酸-苯丙氨酸-谷氨酸-天门冬氨酸	Amino acids and derivatives	氨基酸及其衍生物	Amino acids and derivatives	氨基酸及其衍生物	C24H30N6O9	2	0.7028	-	14665.2	13152	11404.7	7484.45	3377.37	6686.64	1.21293	0.0119983	0.0562045	0.447414	-1.16032	down
MW0146155	Asp-Ile-Phe-Glu	Asp-Ile-Phe-Glu	Amino acids and derivatives	氨基酸及其衍生物	Amino acids and derivatives	氨基酸及其衍生物	C24H34N4O9	3	0.9299	-	2469.75	5548.91	2940.88	9748.42	11153.7	7460.63	1.24483	0.0161983	0.0681668	2.58795	1.37181	up
MEDN1261	LPS(18:3/0:0)	LPS(18:3/0:0)	GP	甘油磷脂类	LPS	溶血磷脂酰丝氨酸	C24H42NO9P	3	0.8474	-	52754.2	58857.5	53664.7	20174.4	20692.6	19671.5	1.41392	0.00243782	0.0236088	0.366286	-1.44896	down
MW0144461	Ala-Ala-Pro-Ala-Ala	Ala-Ala-Pro-Ala-Ala	Amino acids and derivatives	氨基酸及其衍生物	Amino acids and derivatives	氨基酸及其衍生物	C17H29N5O6	3	0.8345	-	251.21	433.33	547.7	1384.11	2839.63	2004.33	1.32463	0.0533701	0.148423	5.05427	2.3375	up
MW0193345	Luteolin-7-O-glucuronide-(2→1)-(2''-Feruloyl)glucuronide	木犀草素-7-O-葡萄糖醛酸苷(2→1)-(2''-阿魏酰)葡萄糖醛酸苷	Flavonoids	黄酮	Flavones	黄酮	C37H34O21	3	0.8108	-	13828.6	15434.2	11444.7	8801.65	452.98	2060.94	1.05046	0.0445855	0.131433	0.277973	-1.84699	down
MW0146103	Asp-Glu-Leu-Asn-Gln	Asp-Glu-Leu-Asn-Gln	Amino acids and derivatives	氨基酸及其衍生物	Amino acids and derivatives	氨基酸及其衍生物	C24H39N7O12	3	0.7913	-	104675	80649.6	81114	24242	23678.5	23243.3	1.40544	0.0144331	0.0635806	0.267093	-1.90459	down
MW0153786	Methyl (1S,4aS,7aS)-1-(beta-D-glucopyranosyloxy)-4'-((1S)-1-(((2E)-3-(4-hydroxyphenyl)prop-2-enoyl)oxy)ethyl)-5'-oxo-4a,7a-dihydro-1H,5'H-spiro[cyclopenta[c]pyran-7,2'-furan]-4-carboxylate	Methyl (1S,4aS,7aS)-1-(beta-D-glucopyranosyloxy)-4'-((1S)-1-(((2E)-3-(4-hydroxyphenyl)prop-2-enoyl)oxy)ethyl)-5'-oxo-4a,7a-dihydro-1H,5'H-spiro[cyclopenta[c]pyran-7,2'-furan]-4-carboxylate	Others	其它类	Lactones	内酯类化合物	C30H32O14	3	0.7369	-	3033.15	4493.92	2111.92	7165.78	7976.51	6848.63	1.26233	0.0140997	0.0626204	2.28145	1.18995	up
Lmzn001925	3,4'-Dihydroxy-3'-methoxybenzenepentanoic acid	3,4'-二羟基-3'-甲氧基苯戊酸	Phenolic acids	酚酸类	Phenolic acids	酚酸类	C12H16O5	3	0.7361	-	26612	35492.7	33052.1	14221.7	12061.8	8843.84	1.34822	0.00579183	0.0372119	0.369153	-1.43771	down
MW0144211	Abu-Phe-OH	Abu-Phe-OH	Amino acids and derivatives	氨基酸及其衍生物	Amino acids and derivatives	氨基酸及其衍生物	C18H18N2O6	3	0.7205	-	1054.81	2982.3	2148.32	8430.48	9270.19	10125.2	1.31972	0.000681752	0.0124866	4.49862	2.16948	up
MW0145998	Asn-TyrMe-OH	Asn-TyrMe-OH	Amino acids and derivatives	氨基酸及其衍生物	Amino acids and derivatives	氨基酸及其衍生物	C19H19N3O8	3	0.6995	-	297814	326497	373662	130408	122648	123271	1.40391	0.0104578	0.0515488	0.377091	-1.40701	down
MW0158704	TyrMe-Ile-OH	TyrMe-Ile-OH	Amino acids and derivatives	氨基酸及其衍生物	Amino acids and derivatives	氨基酸及其衍生物	C22H26N2O7	3	0.689	-	8.94306e+06	1.00361e+07	1.01439e+07	4.58263e+06	4.4571e+06	4.07178e+06	1.40507	0.00189479	0.0202964	0.45021	-1.15133	down
MW0149953	Glu-Asp-Thr-Glu	谷氨酸-天门冬氨酸-苏氨酸-谷氨酸	Amino acids and derivatives	氨基酸及其衍生物	Amino acids and derivatives	氨基酸及其衍生物	C18H28N4O12	3	0.6746	-	1794.37	357.94	2020.98	5426.4	4300.23	2249.04	1.00198	0.0886544	0.211087	2.8696	1.52085	up
MW0150187	Glu-Tyr-Asp-Lys	谷氨酸-酪氨酸-天门冬氨酸-赖氨酸	Amino acids and derivatives	氨基酸及其衍生物	Amino acids and derivatives	氨基酸及其衍生物	C24H35N5O10	3	0.6742	-	9664.06	10276.5	2725.42	736.31	832.28	144.23	1.25129	0.100973	0.228881	0.0755678	-3.72608	down
MW0156957	Ser-Tyr-His-Asp	Ser-Tyr-His-Asp	Amino acids and derivatives	氨基酸及其衍生物	Amino acids and derivatives	氨基酸及其衍生物	C22H28N6O9	3	0.673	-	37.8	338.9	35.85	1088.92	1025.56	1200.57	1.23831	0.00348282	0.0278893	8.03551	3.00639	up
MW0151218	HoPhe-Met-OH	HoPhe-Met-OH	Others	其它类	Lactones	内酯类化合物	C20H22N2O6S	3	0.6667	-	8812.71	11140.5	14130.6	3775.88	3964.58	5665.08	1.31619	0.0330966	0.107921	0.393311	-1.34626	down
MW0157592	Thr-Asp-Phe-Glu	Thr-Asp-Phe-Glu	Amino acids and derivatives	氨基酸及其衍生物	Amino acids and derivatives	氨基酸及其衍生物	C22H30N4O10	3	0.6407	-	30497.7	29970.7	33006.6	1115.28	1004.81	5429.76	1.32315	0.000223156	0.00685836	0.0807687	-3.63006	down
MW0155448	Phe-HoPhe-OH	Phe-HoPhe-OH	Amino acids and derivatives	氨基酸及其衍生物	Amino acids and derivatives	氨基酸及其衍生物	C24H22N2O6	3	0.6156	-	6404.57	6173.02	4358.13	1029.3	1067.94	2046.44	1.33729	0.0100085	0.0504067	0.244671	-2.03108	down
MW0156772	Ser-His-Gln-Glu	Ser-His-Gln-Glu	Amino acids and derivatives	氨基酸及其衍生物	Amino acids and derivatives	氨基酸及其衍生物	C19H29N7O9	3	0.6149	-	1094.04	1024.64	1395.66	6515.95	5412.53	4007.81	1.38274	0.0269539	0.0940013	4.53465	2.18099	up
MW0144489	Ala-Asn-Asp-Asp	Ala-Asn-Asp-Asp	Amino acids and derivatives	氨基酸及其衍生物	Amino acids and derivatives	氨基酸及其衍生物	C15H23N5O10	3	0.6109	-	40956.8	38761.2	36341.4	21192.7	20048.7	13785.8	1.33131	0.00366669	0.0284837	0.474129	-1.07665	down
MW0159269	Val-HoPhe-OH	Val-HoPhe-OH	Amino acids and derivatives	氨基酸及其衍生物	Amino acids and derivatives	氨基酸及其衍生物	C20H22N2O6	3	0.6104	-	360667	291986	303004	129144	119234	139849	1.39595	0.00848625	0.0456832	0.406241	-1.29959	down
MW0144826	Ala-HoPhe-OH	Ala-HoPhe-OH	Amino acids and derivatives	氨基酸及其衍生物	Amino acids and derivatives	氨基酸及其衍生物	C18H18N2O6	3	0.5925	-	11079.9	38506.6	37282.8	11030.3	8516.11	5596.37	1.10694	0.144333	0.290902	0.289433	-1.7887	down
MW0154271	Nap-Asp-OH	Nap-Asp-OH	Amino acids and derivatives	氨基酸及其衍生物	Amino acids and derivatives	氨基酸及其衍生物	C22H18N2O8	3	0.5651	-	18280.5	13977.8	15006.5	33698.1	31365.3	45003.2	1.34823	0.0293757	0.099724	2.32872	1.21954	up
MW0151436	Ile-Gly-Lys-Ile-Phe	Ile-Gly-Lys-Ile-Phe	Amino acids and derivatives	氨基酸及其衍生物	Amino acids and derivatives	氨基酸及其衍生物	C29H48N6O6	3	0.5594	-	3037.17	1298.3	5014.87	579.98	1119.06	1321.07	1.0571	0.184076	0.340771	0.322995	-1.63042	down
