# Supplementary material
Source: Research Square preprint supplement (doi:10.21203/rs.3.rs-10078689/v1)
Supplement: Supplementary file 4 [file ca18f29d43c4303a67c6e28a.xlsx]

## Sheet: Sheet1
Sr No	Gene Id	pathway	Forward Primer	Reverse primer
1	Cla97C02G049940	Phenypropanoid biosybthesis pathway 1DAP	TTATCTGGGGCCCACACATT	TGAGAAGACCGGAGTTGGAC
2	Cla97C05G098800	Phenypropanoid biosybthesis pathway 1DAP	TCAGGGGTTGTGATGCTTCT	TCTCGTCTTCCCAACTCGAC
3	Cla97C02G049930	Phenypropanoid biosybthesis pathway 1DAP	TGCCTCCGTCAAAAGAGCTA	AACAATCTCGAGGCCTTGGA
4	Cla97C10G203590	Phenypropanoid biosybthesis pathway 1DAP	GGCCAAGAACCATTTGAGCT	ACGGCAGTGTTTCCATGTTC
5	Cla97C02G031020	Plant hormone signal transduction 1DAP	TTTGGTGGGCATGCTGTTAC	TCGAAGGGGTGATTTTGGGA
6	Cla97C05G092790	Plant hormone signal transduction 1DAP	CGATTCTCTCCTCCCATCCC	ACCCAGGCACATAGAGGTTC
7	Cla97C09G170160	Plant hormone signal transduction 1DAP	CGAGGCTTTGCTGAAACTGT	TTCACGAACGCCAACATGTT
8	Cla97C09G164500	Plant hormone signal transduction 1DAP	AGTAAGGGACAAGTCGTGGG	TTCCCAGTTCCAAAGCAAGC
9	Cla97C07G132190	Protein processing in ER 1DAP	CACTCGCATCGACTGGAAAG	CCTTCACCTCCTCCGCTTTA
10	Cla97C01G001870	Protein processing in ER 1DAP	GACCAAGGTTTTCAGCCCTG	CATCCTTGGTTGCTTGCCTT
11	Cla97C07G132280	Protein processing in ER 1DAP	GGCCGATCTTCCTGGTATCA	CTCCATTCTCCATGCTTGCC
12	Cla97C08G157760	Protein processing in ER 1DAP	ATCAACCCAAGACACCCGAT	CTGCTTCCTCTTCCTCGTCA
13	Cla97C09G180900	Brassinosteroid biosynthesis 2DAP	TCGTCGTTAGCTTCACCAGT	TCGTTTGCTTTGATGCCCAA
14	Cla97C11G209280	Brassinosteroid biosynthesis 2DAP	CCAATTTGCTGACGTGGACA	TCCACGTCAACTTTCGCTTG
15	Cla97C03G067590	Protein processing in ER 2DAP	TCAACCCTGAGAACCCCATC	CCGAGCTTCAACATCCTGTG
16	Cla97C10G191220	Protein processing in ER 2DAP	ATTCCGCTCTTTCTCTGCCT	CTTTCCAGTCCACTTGTGCC
17	Cla97C05G108440	Protein processing in ER 2DAP	TCACCTCCATTTACGAGCGA	CAGCCTTCACAACCAGCATT
18	Cla97C09G181360	Protein processing in ER 2DAP	ATCTGGGTGGAGGAACGTTT	AGTTTGGGCAGTGGATGAGA
19	Cla97C05G096220	Plant hormone signal transduction 2DAP	AAATCACGGACCAGGGGATT	TACTGCGACATTGTCCCTGT
20	Cla97C05G104280	Plant hormone signal transduction 2DAP	CACTCTTGCCCTTCAGCTTG	TCACACCTTCCACGAATTGC
21	Cla97C09G170160	Plant hormone signal transduction 2DAP	CGAGGCTTTGCTGAAACTGT	TTCACGAACGCCAACATGTT
22	Cla97C11G212910	Plant hormone signal transduction 2DAP	TGGTATGGTCGTTAGTCCGG	CTGTGGTCTCCTCCTACGAC
