# Supplementary material
Source: Research Square preprint supplement (doi:10.21203/rs.3.rs-10078689/v1)
Supplement: Supplementary file 5 [file e990fb8234f68eaef75bfbfe.xlsx]

## Sheet: S2
GeneID	Length	E-Expression	F-Expression	log2FoldChange(F/E)	Pvalue	Padj	Up/Down-Regulation(F/E)	KEGG_ANNOT	KEGG_pathway	GO_MF	GO_BP	GO_CC	COG_Description	Gene_description
Cla97C00G000530	2475	24.5366	0.300799	-6.04874	2.36e-06	1.53e-05	Down	NA	NA	NA	NA	NA	beta-galactosidase	Beta-galactosidase
Cla97C01G000720	384	28.3027	10.4174	-1.4274	0.00358512	0.0111669	Down	NA	NA	NA	NA	NA	NA	Unknown protein
Cla97C01G000780	879	548.046	166.691	-1.72077	1.3e-44	1.49e-42	Down	K01183 E3.2.1.14; chitinase [EC:3.2.1.14]	ko00520:Amino sugar and nucleotide sugar metabolism	NA	NA	NA	Belongs to the glycosyl hydrolase 18 family	acidic endochitinase-like
Cla97C01G001310	1149	54.0586	24.2614	-1.15223	0.000426016	0.00170272	Down	K09287 RAV; RAV-like factor	NA	GO:0003674;GO:0003700;GO:0140110;	GO:0000003;GO:0003006;GO:0006355;GO:0007275;GO:0008150;GO:0009791;GO:0009889;GO:0009908;GO:0010468;GO:0010556;GO:0019219;GO:0019222;GO:0022414;GO:0022603;GO:0031323;GO:0031326;GO:0032501;GO:0032502;GO:0048366;GO:0048367;GO:0048608;GO:0048731;GO:0048827;GO:0048831;GO:0048856;GO:0050789;GO:0050793;GO:0050794;GO:0051171;GO:0051239;GO:0051252;GO:0060255;GO:0061458;GO:0065007;GO:0080090;GO:0090567;GO:…	NA	B3 DNA binding domain	TF-B3 domain-containing protein
Cla97C01G001510	1419	244.482	89.6938	-1.45401	6.93e-18	1.98e-16	Down	NA	NA	NA	GO:0001101;GO:0006725;GO:0006810;GO:0006833;GO:0006950;GO:0006952;GO:0006970;GO:0007275;GO:0008150;GO:0008152;GO:0009058;GO:0009059;GO:0009605;GO:0009607;GO:0009620;GO:0009628;GO:0009698;GO:0009699;GO:0009719;GO:0009725;GO:0009737;GO:0009791;GO:0009889;GO:0009891;GO:0009893;GO:0009987;GO:0010033;GO:0010115;GO:0010143;GO:0010148;GO:0010345;GO:0010556;GO:0010557;GO:0010565;GO:0010604;GO:0019216;GO:…	GO:0005575;GO:0005618;GO:0005623;GO:0009505;GO:0030312;GO:0044464;GO:0071944;	Serine hydrolase	AB hydrolase-1 domain-containing protein
Cla97C01G001800	210	41.3867	16.4258	-1.32134	0.00108423	0.00389646	Down	NA	NA	NA	NA	NA	NA	Unknown protein
Cla97C01G001870	1998	43012.9	17364.9	-1.30835	1.75e-293	3.22e-290	Down	K09490 HSPA5, BIP; endoplasmic reticulum chaperone BiP [EC:3.6.4.10]	ko03060:Protein export|ko04141:Protein processing in endoplasmic reticulum	NA	NA	GO:0005575;GO:0005622;GO:0005623;GO:0005737;GO:0005783;GO:0005788;GO:0012505;GO:0031974;GO:0043226;GO:0043227;GO:0043229;GO:0043231;GO:0043233;GO:0044422;GO:0044424;GO:0044432;GO:0044444;GO:0044446;GO:0044464;GO:0070013;	Belongs to the heat shock protein 70 family	Heat shock protein 70
Cla97C01G001930	996	24.3405	9.72321	-1.30496	0.0122909	0.0323622	Down	K01194 TREH, treA, treF; alpha,alpha-trehalase [EC:3.2.1.28]	ko00500:Starch and sucrose metabolism	GO:0003674;GO:0003824;GO:0004553;GO:0004555;GO:0015927;GO:0016787;GO:0016798;	GO:0005975;GO:0005984;GO:0005991;GO:0005993;GO:0008150;GO:0008152;GO:0009056;GO:0009311;GO:0009313;GO:0009987;GO:0016052;GO:0044237;GO:0044238;GO:0044248;GO:0044262;GO:0044275;GO:0046352;GO:0071704;GO:1901575;	GO:0005575;GO:0005623;GO:0005886;GO:0016020;GO:0044464;GO:0071944;	Alpha-trehalose glucohydrolase	Trehalase
Cla97C01G002180	285	152.594	59.7147	-1.3455	1.3e-09	1.46e-08	Down	NA	NA	NA	NA	NA	NA	Unknown protein
Cla97C01G002480	870	8.00253	0.902398	-3.02035	0.0132396	0.0344832	Down	K15746 crtZ; beta-carotene 3-hydroxylase [EC:1.14.15.24]	ko00906:Carotenoid biosynthesis	NA	NA	NA	Belongs to the sterol desaturase family	Beta-carotene hydroxylase
Cla97C01G003420	606	630.562	14.4055	-5.48463	1.81e-108	6.1e-106	Down	NA	NA	NA	NA	NA	Transcription factor	BHLH transcription factor
Cla97C01G003780	2175	188.03	90.799	-1.05267	1.53e-09	1.7e-08	Down	K00276 AOC3, AOC2, tynA; primary-amine oxidase [EC:1.4.3.21]	ko00260:Glycine, serine and threonine metabolism|ko00350:Tyrosine metabolism|ko00360:Phenylalanine metabolism|ko00410:beta-Alanine metabolism|ko00950:Isoquinoline alkaloid biosynthesis|ko00960:Tropane, piperidine and pyridine alkaloid biosynthesis	NA	GO:0001101;GO:0001505;GO:0006807;GO:0006809;GO:0007154;GO:0007165;GO:0008150;GO:0008152;GO:0009058;GO:0009719;GO:0009725;GO:0009737;GO:0009738;GO:0009755;GO:0009987;GO:0010033;GO:0017144;GO:0023052;GO:0032870;GO:0033993;GO:0034641;GO:0042133;GO:0042136;GO:0042221;GO:0044237;GO:0044249;GO:0044271;GO:0046209;GO:0050789;GO:0050794;GO:0050896;GO:0051716;GO:0065007;GO:0065008;GO:0070887;GO:0071215;GO:…	NA	Primary amine	Amine oxidase
Cla97C01G003950	729	211.989	98.4919	-1.11012	7.28e-11	9.68e-10	Down	K25796 YAB; plant-specific transcription factor YABBY family protein	NA	NA	NA	NA	Axial regulator YABBY 1-like	YABBY protein
Cla97C01G004850	972	91.6258	42.7827	-1.09156	1.67e-05	9.24e-05	Down	NA	NA	NA	NA	GO:0005575;GO:0005623;GO:0005886;GO:0005911;GO:0009506;GO:0016020;GO:0030054;GO:0044464;GO:0055044;GO:0071944;	Kinase-like protein TMKL1	Protein kinase domain-containing protein
Cla97C01G005260	2406	4.95791	0	-4.69739	0.0047573	0.0142776	Down	NA	NA	NA	NA	NA	beta-galactosidase	Beta-galactosidase
Cla97C01G005270	2475	4.86279	0	-4.67433	0.00461806	0.0139091	Down	NA	NA	NA	NA	NA	beta-galactosidase	Beta-galactosidase
Cla97C01G005520	1107	123.398	44.3266	-1.46943	6.16e-10	7.19e-09	Down	K05282 GA20ox; gibberellin-44 dioxygenase [EC:1.14.11.12]	ko00904:Diterpenoid biosynthesis	GO:0003674;GO:0003824;GO:0016491;GO:0016705;GO:0016706;GO:0045544;GO:0051213;	GO:0000003;GO:0000902;GO:0001101;GO:0003006;GO:0006082;GO:0006629;GO:0006720;GO:0006721;GO:0007154;GO:0007165;GO:0007275;GO:0008150;GO:0008152;GO:0008299;GO:0008610;GO:0009058;GO:0009314;GO:0009416;GO:0009628;GO:0009639;GO:0009648;GO:0009653;GO:0009685;GO:0009686;GO:0009719;GO:0009725;GO:0009739;GO:0009740;GO:0009755;GO:0009791;GO:0009826;GO:0009908;GO:0009987;GO:0010033;GO:0010228;GO:0010476;GO:…	GO:0005575;GO:0005622;GO:0005623;GO:0005737;GO:0044424;GO:0044464;	Belongs to the iron ascorbate-dependent oxidoreductase family	gibberellin 20 oxidase 1-like
Cla97C01G005660	501	43.9881	12.2775	-1.83659	1.13e-05	6.44e-05	Down	NA	NA	NA	NA	NA	Olee1-like	olee1-like protein
Cla97C01G005690	1563	595.081	236.118	-1.33081	7.9e-32	5.77e-30	Down	K13783 SLC37A1_2; MFS transporter, OPA family, solute carrier family 37 (glycerol-3-phosphate transporter), member 1/2	NA	NA	GO:0008150;GO:0042592;GO:0048878;GO:0050801;GO:0055062;GO:0055081;GO:0055083;GO:0065007;GO:0065008;GO:0072505;GO:0072506;GO:0098771;	NA	glycerol-3-phosphate transporter	MFS domain-containing protein
Cla97C01G006690	1548	56.2372	23.4818	-1.25229	0.000186143	0.000809526	Down	K01051 E3.1.1.11; pectinesterase [EC:3.1.1.11]	ko00040:Pentose and glucuronate interconversions	GO:0003674;GO:0003824;GO:0004857;GO:0016787;GO:0016788;GO:0030234;GO:0030599;GO:0046910;GO:0052689;GO:0098772;	GO:0008150;GO:0043086;GO:0044092;GO:0050790;GO:0065007;GO:0065009;	GO:0005575;GO:0005623;GO:0044464;GO:0071944;	Acts in the modification of cell walls via demethylesterification of cell wall pectin	Pectinesterase
Cla97C01G007040	420	28.3923	6.00842	-2.21588	5.61e-05	0.000275234	Down	NA	NA	NA	NA	NA	NA	Unknown protein
Cla97C01G007290	1497	64.9483	20.1303	-1.70213	1.29e-06	8.8e-06	Down	K01580 E4.1.1.15, gadB, gadA, GAD; glutamate decarboxylase [EC:4.1.1.15]	ko00250:Alanine, aspartate and glutamate metabolism|ko00410:beta-Alanine metabolism|ko00430:Taurine and hypotaurine metabolism|ko00650:Butanoate metabolism	GO:0003674;GO:0003824;GO:0004351;GO:0005488;GO:0005515;GO:0005516;GO:0016829;GO:0016830;GO:0016831;	GO:0008150;GO:0010035;GO:0010038;GO:0042221;GO:0046686;GO:0050896;	GO:0005575;GO:0005622;GO:0005623;GO:0005737;GO:0005829;GO:0044424;GO:0044444;GO:0044464;	Belongs to the group II decarboxylase family	Glutamate decarboxylase
Cla97C01G007340	225	1861.77	456.583	-2.03063	4.1e-162	3.19e-159	Down	NA	NA	NA	GO:0006950;GO:0006952;GO:0008150;GO:0050896;	GO:0005575;GO:0005618;GO:0005623;GO:0005886;GO:0009505;GO:0016020;GO:0030312;GO:0044464;GO:0071944;	Belongs to the DEFL family	Defensin-like protein 6
Cla97C01G007540	1707	55.9479	8.17669	-2.7326	5.24e-10	6.17e-09	Down	K01051 E3.1.1.11; pectinesterase [EC:3.1.1.11]	ko00040:Pentose and glucuronate interconversions	GO:0003674;GO:0003824;GO:0004857;GO:0016787;GO:0016788;GO:0030234;GO:0030599;GO:0046910;GO:0052689;GO:0098772;	GO:0008150;GO:0043086;GO:0044092;GO:0050790;GO:0065007;GO:0065009;	GO:0005575;GO:0005623;GO:0044464;GO:0071944;	Pectinesterase	Pectinesterase
Cla97C01G007550	1704	41.9948	15.8546	-1.37359	0.00213436	0.00710282	Down	K01051 E3.1.1.11; pectinesterase [EC:3.1.1.11]	ko00040:Pentose and glucuronate interconversions	GO:0003674;GO:0003824;GO:0004857;GO:0016787;GO:0016788;GO:0030234;GO:0030599;GO:0046910;GO:0052689;GO:0098772;	GO:0008150;GO:0043086;GO:0044092;GO:0050790;GO:0065007;GO:0065009;	GO:0005575;GO:0005623;GO:0044464;GO:0071944;	Pectinesterase	Pectinesterase
Cla97C01G007580	1536	1836.54	701.118	-1.38704	1.56e-78	4.05e-76	Down	K01881 PARS, proS; prolyl-tRNA synthetase [EC:6.1.1.15]	ko00970:Aminoacyl-tRNA biosynthesis	GO:0003674;GO:0003824;GO:0004812;GO:0004827;GO:0016874;GO:0016875;GO:0140098;GO:0140101;	GO:0006082;GO:0006139;GO:0006399;GO:0006412;GO:0006418;GO:0006433;GO:0006518;GO:0006520;GO:0006725;GO:0006807;GO:0008150;GO:0008152;GO:0009058;GO:0009059;GO:0009987;GO:0010467;GO:0016070;GO:0019538;GO:0019752;GO:0034641;GO:0034645;GO:0034660;GO:0043038;GO:0043039;GO:0043043;GO:0043170;GO:0043436;GO:0043603;GO:0043604;GO:0044237;GO:0044238;GO:0044249;GO:0044260;GO:0044267;GO:0044271;GO:0044281;GO:…	GO:0005575;GO:0005622;GO:0005623;GO:0005737;GO:0005829;GO:0005911;GO:0009506;GO:0016020;GO:0017101;GO:0030054;GO:0032991;GO:0044424;GO:0044444;GO:0044464;GO:0055044;	proline--tRNA ligase	Prolyl-tRNA synthetase
Cla97C01G008490	3120	204.157	57.9	-1.80892	9.88e-18	2.79e-16	Down	K01537 ATP2C; P-type Ca2+ transporter type 2C [EC:7.2.2.10]	NA	GO:0003674;GO:0003824;GO:0005215;GO:0005388;GO:0008324;GO:0015075;GO:0015085;GO:0015318;GO:0015399;GO:0015405;GO:0015662;GO:0016462;GO:0016787;GO:0016817;GO:0016818;GO:0016887;GO:0017111;GO:0019829;GO:0022804;GO:0022853;GO:0022857;GO:0022890;GO:0042623;GO:0042625;GO:0042626;GO:0043492;GO:0046873;	GO:0001101;GO:0006810;GO:0006811;GO:0006812;GO:0006816;GO:0006950;GO:0006952;GO:0008150;GO:0009266;GO:0009409;GO:0009414;GO:0009415;GO:0009605;GO:0009607;GO:0009617;GO:0009628;GO:0010035;GO:0010941;GO:0030001;GO:0034220;GO:0042221;GO:0042592;GO:0042742;GO:0043067;GO:0043069;GO:0043207;GO:0048519;GO:0048523;GO:0048878;GO:0050789;GO:0050794;GO:0050801;GO:0050896;GO:0051179;GO:0051234;GO:0051704;GO:…	GO:0000325;GO:0005575;GO:0005622;GO:0005623;GO:0005737;GO:0005773;GO:0005774;GO:0005794;GO:0005886;GO:0005887;GO:0009507;GO:0009536;GO:0009705;GO:0012505;GO:0016020;GO:0016021;GO:0031090;GO:0031224;GO:0031226;GO:0043226;GO:0043227;GO:0043229;GO:0043231;GO:0044422;GO:0044424;GO:0044425;GO:0044437;GO:0044444;GO:0044446;GO:0044459;GO:0044464;GO:0071944;GO:0098588;GO:0098805;	This magnesium-dependent enzyme catalyzes the hydrolysis of ATP coupled with the transport of calcium	Calcium-transporting ATPase
Cla97C01G008730	1731	61.8484	24.4495	-1.34016	2.57e-05	0.000136136	Down	K23618 AAE11_12; acyl-activating enzyme 11/12 [EC:6.2.1.2 6.2.1.-]	NA	GO:0003674;GO:0003824;GO:0016405;GO:0016874;GO:0016877;GO:0016878;GO:0018858;GO:0047760;	GO:0006082;GO:0006629;GO:0006631;GO:0006790;GO:0006807;GO:0008150;GO:0008152;GO:0009058;GO:0009987;GO:0016143;GO:0016144;GO:0019605;GO:0019748;GO:0019752;GO:0019757;GO:0019758;GO:0019760;GO:0019761;GO:0032787;GO:0043436;GO:0044237;GO:0044238;GO:0044249;GO:0044255;GO:0044272;GO:0044281;GO:0044550;GO:0046459;GO:0071704;GO:1901135;GO:1901137;GO:1901564;GO:1901566;GO:1901576;GO:1901657;GO:1901659;	GO:0005575;GO:0005622;GO:0005623;GO:0005737;GO:0005777;GO:0042579;GO:0043226;GO:0043227;GO:0043229;GO:0043231;GO:0044424;GO:0044444;GO:0044464;	butyrate--CoA ligase AAE11, peroxisomal-like	CoA ligase
Cla97C01G008750	297	41.106	14.0596	-1.53463	0.000437955	0.00174509	Down	NA	NA	NA	NA	NA	NA	Unknown protein
Cla97C01G009230	1866	246.496	95.7098	-1.35553	2.22e-11	3.17e-10	Down	K20177 VPS3, TGFBRAP1; vacuolar protein sorting-associated protein 3	NA	GO:0003674;GO:0005488;GO:0005515;GO:0046332;	GO:0007154;GO:0007165;GO:0008150;GO:0009987;GO:0023052;GO:0050789;GO:0050794;GO:0050896;GO:0051716;GO:0065007;	NA	Transforming growth factor-beta receptor-associated protein	transforming growth factor-beta receptor-associated protein 1
Cla97C01G009330	246	24.1552	8.83079	-1.44323	0.00484607	0.0145031	Down	NA	NA	NA	NA	NA	NA	Unknown protein
Cla97C01G009640	696	129.976	54.3858	-1.25618	4.84e-08	4.28e-07	Down	NA	NA	GO:0003674;GO:0005488;GO:0005515;GO:0030246;GO:0043394;GO:0097367;	GO:0008150;GO:0009605;GO:0009607;GO:0009625;GO:0043207;GO:0050896;GO:0051704;GO:0051707;	NA	Protein PHLOEM PROTEIN 2-LIKE	Phloem lectin
Cla97C01G009650	696	129.362	52.8818	-1.2929	3.12e-08	2.84e-07	Down	NA	NA	GO:0003674;GO:0005488;GO:0005515;GO:0030246;GO:0043394;GO:0097367;	GO:0008150;GO:0009605;GO:0009607;GO:0009625;GO:0043207;GO:0050896;GO:0051704;GO:0051707;	NA	Protein PHLOEM PROTEIN 2-LIKE	Phloem lectin
Cla97C01G009870	228	37.1858	18.0023	-1.04111	0.0100118	0.0271271	Down	NA	NA	NA	NA	NA	NA	Unknown protein
Cla97C01G011630	678	14.7159	0	-6.27561	3.3e-06	2.09e-05	Down	NA	NA	NA	NA	NA	NA	Unknown protein
Cla97C01G012450	1293	18.7844	4.32637	-2.09726	0.0019095	0.00643492	Down	K16903 TAA1; L-tryptophan---pyruvate aminotransferase [EC:2.6.1.99]	ko00380:Tryptophan metabolism	GO:0003674;GO:0003824;GO:0008483;GO:0016740;GO:0016769;GO:0050362;GO:0070529;GO:0080097;	GO:0000003;GO:0003006;GO:0006950;GO:0006952;GO:0007154;GO:0007275;GO:0008150;GO:0009605;GO:0009606;GO:0009607;GO:0009617;GO:0009628;GO:0009629;GO:0009630;GO:0009653;GO:0009719;GO:0009723;GO:0009725;GO:0009791;GO:0009888;GO:0009908;GO:0009958;GO:0009987;GO:0009991;GO:0010015;GO:0010033;GO:0010073;GO:0010074;GO:0010078;GO:0010087;GO:0019827;GO:0022414;GO:0022622;GO:0031667;GO:0031668;GO:0031669;GO:…	GO:0005575;GO:0005622;GO:0005623;GO:0005737;GO:0005783;GO:0005789;GO:0012505;GO:0016020;GO:0031984;GO:0042175;GO:0043226;GO:0043227;GO:0043229;GO:0043231;GO:0044422;GO:0044424;GO:0044425;GO:0044432;GO:0044444;GO:0044446;GO:0044464;GO:0098827;	Tryptophan aminotransferase-related protein	tryptophan aminotransferase-related protein 2
Cla97C01G012820	837	13336.6	5677.4	-1.23257	2.12e-164	1.72e-161	Down	K11252 H2B; histone H2B	NA	NA	NA	NA	Core histone H2A/H2B/H3/H4	Histone H2B
Cla97C01G013190	285	18.2272	6.2665	-1.51516	0.0157163	0.0399169	Down	NA	NA	NA	NA	NA	NA	Unknown protein
Cla97C01G013800	246	17.6756	5.7176	-1.61423	0.0131304	0.034221	Down	NA	NA	NA	NA	NA	NA	Unknown protein
Cla97C01G014250	312	64.7358	24.7203	-1.39173	1.24e-05	7.01e-05	Down	NA	NA	NA	NA	NA	NA	Unknown protein
Cla97C01G014430	1965	42.8432	21.0427	-1.03077	0.00586598	0.0171176	Down	NA	NA	NA	NA	NA	Aminotransferase class-V	Aminotran_5 domain-containing protein
Cla97C01G014670	216	91.5421	44.5572	-1.03936	3.01e-05	0.000157273	Down	NA	NA	NA	NA	NA	NA	Unknown protein
Cla97C01G014820	285	13.1732	3.47667	-1.93143	0.0140237	0.0362133	Down	NA	NA	NA	NA	NA	NA	Unknown protein
Cla97C01G014880	339	18.5555	6.95334	-1.42685	0.0141693	0.036552	Down	NA	NA	NA	NA	NA	NA	Unknown protein
Cla97C01G015620	780	171.891	49.6809	-1.77771	1.33e-15	3.08e-14	Down	NA	NA	GO:0003674;GO:0003824;GO:0016787;GO:0016788;GO:0016829;GO:0016830;GO:0016832;GO:0046593;GO:0052689;GO:0080030;GO:0080031;GO:0080032;	GO:0002376;GO:0006082;GO:0006725;GO:0006950;GO:0006952;GO:0006955;GO:0008150;GO:0008152;GO:0009056;GO:0009605;GO:0009607;GO:0009611;GO:0009620;GO:0009627;GO:0009696;GO:0009814;GO:0009817;GO:0009987;GO:0010817;GO:0016137;GO:0016139;GO:0016999;GO:0017144;GO:0018958;GO:0019752;GO:0032787;GO:0042445;GO:0042537;GO:0043207;GO:0043436;GO:0044237;GO:0044281;GO:0045087;GO:0050832;GO:0050896;GO:0051704;GO:…	NA	salicylic acid-binding protein 2-like	Salicylic acid-binding protein 2-like
Cla97C01G015980	1455	67.3909	8.24935	-2.99254	4.69e-13	8.31e-12	Down	NA	NA	NA	NA	GO:0005575;GO:0005576;GO:0005615;GO:0044421;	triglyceride lipase activity	Lipase_3 domain-containing protein
Cla97C01G016060	207	76.6007	32.6457	-1.23724	2.5e-05	0.000132965	Down	NA	NA	NA	NA	NA	NA	Unknown protein
Cla97C01G016350	1824	140.161	68.3376	-1.04477	6.36e-07	4.62e-06	Down	K14487 GH3; auxin responsive GH3 gene family	ko04075:Plant hormone signal transduction	GO:0003674;GO:0003824;GO:0010279;GO:0016874;GO:0016879;GO:0016881;	GO:0008150;GO:0009314;GO:0009416;GO:0009628;GO:0009719;GO:0009725;GO:0009733;GO:0010033;GO:0010252;GO:0042221;GO:0042592;GO:0048878;GO:0050896;GO:0065007;GO:0065008;	NA	Indole-3-acetic acid-amido synthetase	Auxin-responsive GH3 family protein
Cla97C01G016980	276	13.9901	2.96788	-2.20716	0.00495292	0.0147857	Down	NA	NA	NA	NA	NA	NA	Unknown protein
Cla97C01G017260	180	26.2087	6.19385	-2.04511	0.000529123	0.00206467	Down	NA	NA	NA	NA	NA	NA	Unknown protein
Cla97C01G017630	1425	250.013	121.934	-1.03716	7.77e-12	1.18e-10	Down	NA	NA	NA	NA	NA	UDP-glycosyltransferase 91A1-like	UDP-glycosyltransferase 91A1-like
Cla97C01G019600	324	25.9907	9.24696	-1.49424	0.00393131	0.0120982	Down	K14488 SAUR; SAUR family protein	ko04075:Plant hormone signal transduction	NA	NA	NA	Auxin-induced protein	auxin-responsive protein SAUR50
Cla97C01G020720	348	21.1541	8.50984	-1.3361	0.015532	0.0395531	Down	NA	NA	NA	NA	NA	NA	Unknown protein
Cla97C01G020930	513	35.0099	15.546	-1.17543	0.00495762	0.0147932	Down	NA	NA	NA	NA	NA	NA	Unknown protein
Cla97C01G021180	963	1223.76	496.143	-1.3024	5.22e-58	9.34e-56	Down	K05933 E1.14.17.4; aminocyclopropanecarboxylate oxidase [EC:1.14.17.4]	ko00270:Cysteine and methionine metabolism	NA	GO:0008150;GO:0008152;GO:0009058;GO:0009692;GO:0009693;GO:0009987;GO:0010817;GO:0042445;GO:0042446;GO:0043449;GO:0043450;GO:0044237;GO:0044249;GO:0065007;GO:0065008;GO:0071704;GO:1900673;GO:1900674;GO:1901576;	NA	Belongs to the iron ascorbate-dependent oxidoreductase family	1-aminocyclopropane-1-carboxylate oxidase
Cla97C01G021290	1056	19.0688	5.10602	-1.88816	0.00488505	0.014609	Down	NA	NA	NA	NA	NA	homeobox protein	Homeobox protein knotted-1, putative
Cla97C01G022320	1155	38.5308	8.49986	-2.20355	4.26e-06	2.64e-05	Down	K09422 MYBP; transcription factor MYB, plant	NA	GO:0000981;GO:0001067;GO:0001134;GO:0001135;GO:0003674;GO:0003676;GO:0003677;GO:0003700;GO:0005488;GO:0043565;GO:0044212;GO:0097159;GO:0140110;GO:1901363;GO:0005515;GO:0008134;	GO:0001101;GO:0006355;GO:0006357;GO:0006950;GO:0006970;GO:0008150;GO:0009611;GO:0009628;GO:0009651;GO:0009719;GO:0009723;GO:0009725;GO:0009737;GO:0009753;GO:0009889;GO:0009987;GO:0010033;GO:0010468;GO:0010556;GO:0019219;GO:0019222;GO:0030154;GO:0031323;GO:0031326;GO:0032502;GO:0033993;GO:0042221;GO:0048869;GO:0050789;GO:0050794;GO:0050896;GO:0051171;GO:0051252;GO:0060255;GO:0065007;GO:0080090;GO:…	GO:0005575;GO:0005622;GO:0005623;GO:0005634;GO:0043226;GO:0043227;GO:0043229;GO:0043231;GO:0044424;GO:0044464;	transcription factor	transcription factor MYB34-like
Cla97C01G022530	750	91.6252	40.8777	-1.17004	5.28e-06	3.21e-05	Down	NA	NA	NA	NA	NA	NA	Unknown protein
Cla97C01G023170	639	24.7019	8.51003	-1.53187	0.0033	0.0103883	Down	NA	NA	GO:0003674;GO:0003676;GO:0003677;GO:0003700;GO:0005488;GO:0043565;GO:0097159;GO:0140110;GO:1901363;	GO:0000075;GO:0000077;GO:0006355;GO:0006950;GO:0006974;GO:0008150;GO:0009314;GO:0009628;GO:0009889;GO:0009891;GO:0009893;GO:0009987;GO:0010212;GO:0010332;GO:0010468;GO:0010556;GO:0010557;GO:0010564;GO:0010604;GO:0010628;GO:0019219;GO:0019222;GO:0031323;GO:0031325;GO:0031326;GO:0031328;GO:0031570;GO:0033043;GO:0033554;GO:0040020;GO:0044087;GO:0045786;GO:0045893;GO:0045935;GO:0048518;GO:0048519;GO:…	GO:0005575;GO:0005622;GO:0005623;GO:0005634;GO:0043226;GO:0043227;GO:0043229;GO:0043231;GO:0044424;GO:0044464;	NAC domain-containing protein	NAC domain-containing protein
Cla97C01G023650	507	41.2749	14.7893	-1.47136	0.000692673	0.00261367	Down	NA	NA	NA	NA	NA	Olee1-like	olee1-like protein
Cla97C01G024080	1047	30.6469	14.7336	-1.05818	0.0151718	0.0387773	Down	NA	NA	NA	NA	NA	Belongs to the iron ascorbate-dependent oxidoreductase family	2-oxoglutarate (2OG) and Fe(II)-dependent oxygenase superfamily protein
Cla97C01G025070	2334	323.731	96.0564	-1.74988	0.0018402	0.00622214	Down	NA	NA	GO:0003674;GO:0003824;GO:0005215;GO:0008324;GO:0008490;GO:0008509;GO:0015075;GO:0015103;GO:0015105;GO:0015291;GO:0015318;GO:0015399;GO:0015405;GO:0015446;GO:0016462;GO:0016787;GO:0016817;GO:0016818;GO:0016887;GO:0017111;GO:0019829;GO:0022804;GO:0022853;GO:0022857;GO:0022890;GO:0042623;GO:0042625;GO:0042626;GO:0042947;GO:0043225;GO:0043492;GO:1901505;GO:1901683;GO:1902417;	GO:0006810;GO:0006811;GO:0006812;GO:0006820;GO:0008150;GO:0015698;GO:0015700;GO:0034220;GO:0042221;GO:0042946;GO:0046685;GO:0050896;GO:0051179;GO:0051234;GO:0055085;GO:0071702;GO:0090662;GO:0098655;GO:0098656;GO:0098660;GO:0099131;GO:0099132;GO:0099133;GO:1901264;GO:1901656;GO:1901684;GO:1902418;	GO:0000325;GO:0005575;GO:0005622;GO:0005623;GO:0005737;GO:0005773;GO:0005774;GO:0005911;GO:0009506;GO:0016020;GO:0030054;GO:0031090;GO:0043226;GO:0043227;GO:0043229;GO:0043231;GO:0044422;GO:0044424;GO:0044437;GO:0044444;GO:0044446;GO:0044464;GO:0055044;GO:0098588;GO:0098805;	ABC transporter C family member	ABC transporter C family member 2-like
Cla97C02G026330	312	31.3853	7.41681	-2.07363	0.000405227	0.0016267	Down	NA	NA	NA	NA	NA	NA	Unknown protein
Cla97C02G026480	324	50.3649	19.0374	-1.39079	0.000556165	0.00215813	Down	NA	NA	NA	NA	NA	NA	Unknown protein
Cla97C02G027130	303	66.5126	20.068	-1.71258	7.23e-07	5.18e-06	Down	NA	NA	NA	NA	NA	NA	Unknown protein
Cla97C02G027250	1599	195.206	65.1014	-1.57737	2.05e-16	5.11e-15	Down	K20619 CYP78A; cytochrome P450 family 78 subfamily A	NA	GO:0003674;GO:0003824;GO:0004497;GO:0016491;GO:0016705;GO:0016709;	GO:0008150;GO:0008152;GO:0009058;GO:0019748;GO:0022603;GO:0040034;GO:0044550;GO:0050789;GO:0050793;GO:0055114;GO:0065007;GO:0090709;GO:1905428;GO:0009653;GO:0032502;GO:0048856;GO:0048646;GO:1905393;	GO:0005575;GO:0016020;	Cytochrome p450	cytochrome P450 78A7
Cla97C02G027830	1008	13.1346	3.32118	-2.02848	0.0158778	0.040272	Down	K09422 MYBP; transcription factor MYB, plant	NA	GO:0000981;GO:0001067;GO:0001134;GO:0001135;GO:0003674;GO:0003676;GO:0003677;GO:0003700;GO:0005488;GO:0043565;GO:0044212;GO:0097159;GO:0140110;GO:1901363;GO:0005515;GO:0008134;	GO:0001101;GO:0006109;GO:0006355;GO:0006357;GO:0007275;GO:0008150;GO:0009719;GO:0009725;GO:0009737;GO:0009825;GO:0009889;GO:0009890;GO:0009892;GO:0009987;GO:0010033;GO:0010200;GO:0010243;GO:0010468;GO:0010556;GO:0010558;GO:0010605;GO:0010629;GO:0016049;GO:0019219;GO:0019222;GO:0030154;GO:0031323;GO:0031324;GO:0031326;GO:0031327;GO:0032501;GO:0032502;GO:0033993;GO:0040007;GO:0042221;GO:0042335;GO:…	GO:0005575;GO:0005622;GO:0005623;GO:0005634;GO:0043226;GO:0043227;GO:0043229;GO:0043231;GO:0044424;GO:0044464;	transcription factor	MYB transcription factor
Cla97C02G028020	1314	14.3079	0	-6.23675	4.17e-06	2.59e-05	Down	NA	NA	NA	NA	NA	Belongs to the GRAS family	GRAS domain-containing protein
Cla97C02G028180	381	18.3742	4.73256	-1.9446	0.00368463	0.0114259	Down	NA	NA	NA	NA	NA	NA	Unknown protein
Cla97C02G028380	1083	51.0159	22.5993	-1.1762	0.00065978	0.0025059	Down	NA	NA	NA	NA	NA	NA	glycine-rich cell wall structural protein 1-like
Cla97C02G028550	1791	274.14	30.4778	-3.16949	2.66e-50	3.64e-48	Down	NA	NA	NA	NA	NA	NA	Lycopene beta/epsilon cyclase protein
Cla97C02G029380	513	26.0815	8.45734	-1.6179	0.00175209	0.00596183	Down	NA	NA	NA	NA	NA	NA	Unknown protein
Cla97C02G030260	852	33.6043	13.3326	-1.313	0.00325547	0.0102666	Down	NA	NA	NA	NA	NA	Arabidopsis protein of unknown function	Arabidopsis protein of unknown function (DUF241)
Cla97C02G030430	1560	761.732	227.598	-1.74036	3.68e-57	6.42e-55	Down	NA	NA	NA	NA	GO:0005575;GO:0005618;GO:0005622;GO:0005623;GO:0005737;GO:0005794;GO:0005829;GO:0005911;GO:0009505;GO:0009506;GO:0012505;GO:0016020;GO:0030054;GO:0030312;GO:0043226;GO:0043227;GO:0043229;GO:0043231;GO:0044424;GO:0044444;GO:0044464;GO:0055044;GO:0071944;	Belongs to the expansin family	Expansin-like A1
Cla97C02G030970	2484	46.9431	21.1508	-1.15891	0.00119749	0.00425735	Down	NA	NA	GO:0003674;GO:0003824;GO:0004553;GO:0004565;GO:0015925;GO:0016787;GO:0016798;	NA	GO:0005575;GO:0005618;GO:0005622;GO:0005623;GO:0005737;GO:0005773;GO:0030312;GO:0043226;GO:0043227;GO:0043229;GO:0043231;GO:0044424;GO:0044444;GO:0044464;GO:0071944;	beta-galactosidase	Beta-galactosidase
Cla97C02G031010	1413	247.585	38.4092	-2.68212	1.54e-35	1.28e-33	Down	NA	NA	NA	NA	NA	Nodulin-like	protein NUCLEAR FUSION DEFECTIVE 4-like
Cla97C02G031020	1494	2872.72	1187.62	-1.27441	3.71e-126	1.79e-123	Down	K13946 AUX1, LAX; auxin influx carrier (AUX1 LAX family)	ko04075:Plant hormone signal transduction	NA	NA	NA	Auxin transporter-like protein	Auxin transporter-like protein 2
Cla97C02G031350	252	36.9189	6.73537	-2.43582	1.56e-06	1.05e-05	Down	K14488 SAUR; SAUR family protein	ko04075:Plant hormone signal transduction	NA	GO:0001558;GO:0008150;GO:0010817;GO:0030307;GO:0032879;GO:0040008;GO:0045927;GO:0048518;GO:0048522;GO:0050789;GO:0050794;GO:0051049;GO:0051128;GO:0065007;GO:0065008;GO:2000012;GO:0016049;GO:0040007;GO:0009987;GO:0016043;GO:0071840;GO:0051179;GO:0006810;GO:0051234;GO:0009914;GO:0009926;GO:0060918;	GO:0005575;GO:0005623;GO:0005886;GO:0016020;GO:0019897;GO:0019898;GO:0044425;GO:0044459;GO:0044464;GO:0071944;	auxin-responsive protein	auxin-responsive protein SAUR21-like
Cla97C02G031410	213	80.1667	35.6842	-1.15145	6.8e-05	0.000327752	Down	NA	NA	NA	NA	NA	NA	Unknown protein
Cla97C02G031540	387	38.7025	11.4953	-1.72321	0.00017686	0.00077381	Down	NA	NA	NA	NA	NA	NA	Unknown protein
Cla97C02G031590	3238	1369.87	663.718	-1.0444	1.74e-05	9.59e-05	Down	NA	NA	GO:0003674;GO:0005488;GO:0005515;GO:0042393;	GO:0006139;GO:0006259;GO:0006304;GO:0006305;GO:0006306;GO:0006355;GO:0006725;GO:0006807;GO:0008150;GO:0008152;GO:0009889;GO:0009987;GO:0010468;GO:0010556;GO:0010964;GO:0019219;GO:0019222;GO:0031323;GO:0031326;GO:0031935;GO:0032259;GO:0032776;GO:0033043;GO:0033044;GO:0034641;GO:0043170;GO:0043412;GO:0043414;GO:0044237;GO:0044238;GO:0044260;GO:0044728;GO:0046483;GO:0050789;GO:0050794;GO:0051128;GO:…	GO:0005575;GO:0005622;GO:0005623;GO:0005634;GO:0005737;GO:0005829;GO:0043226;GO:0043227;GO:0043229;GO:0043231;GO:0044424;GO:0044444;GO:0044464;	zinc finger CCCH domain-containing protein	zinc finger CCCH domain-containing protein 19
Cla97C02G031820	774	14.5152	0	-6.25947	4.13e-06	2.56e-05	Down	K23050 PCBER1; phenylcoumaran benzylic ether reductase [EC:1.3.1.-]	NA	NA	NA	NA	isoflavone	isoflavone reductase homolog
Cla97C02G033160	183	44.9715	18.5514	-1.25924	0.00170069	0.00580668	Down	NA	NA	NA	NA	NA	NA	Unknown protein
Cla97C02G033360	348	12.601	1.11039	-3.59175	0.000890686	0.00327594	Down	NA	NA	NA	NA	NA	NA	Unknown protein
Cla97C02G033460	3513	135.868	56.0652	-1.27293	8.03e-08	6.83e-07	Down	K03515 REV1; DNA repair protein REV1 [EC:2.7.7.-]	NA	GO:0003674;GO:0003824;GO:0003887;GO:0016740;GO:0016772;GO:0016779;GO:0017125;GO:0034061;GO:0140097;	GO:0000002;GO:0000731;GO:0002200;GO:0002206;GO:0002376;GO:0002377;GO:0002440;GO:0002520;GO:0002565;GO:0006139;GO:0006259;GO:0006281;GO:0006301;GO:0006302;GO:0006310;GO:0006725;GO:0006807;GO:0006950;GO:0006974;GO:0006996;GO:0007005;GO:0007275;GO:0008150;GO:0008152;GO:0009058;GO:0009059;GO:0009314;GO:0009411;GO:0009416;GO:0009628;GO:0009987;GO:0010224;GO:0016043;GO:0016444;GO:0016445;GO:0018130;GO:…	GO:0005575;GO:0005622;GO:0005623;GO:0005634;GO:0005654;GO:0005694;GO:0005737;GO:0005739;GO:0031974;GO:0031981;GO:0035861;GO:0043226;GO:0043227;GO:0043228;GO:0043229;GO:0043231;GO:0043232;GO:0043233;GO:0044422;GO:0044424;GO:0044427;GO:0044428;GO:0044444;GO:0044446;GO:0044464;GO:0070013;GO:0090734;	Deoxycytidyl transferase involved in DNA repair. Transfers a dCMP residue from dCTP to the 3'-end of a DNA primer in a template-dependent reaction. May assist in the first step in the bypass of abasic lesions by the insertion of a nucleotide opposite the lesion. Required for normal induction of mutations by physical and chemical agents	DNA repair protein REV1
Cla97C02G033750	213	60.6834	27.6754	-1.13205	0.000231601	0.000983551	Down	NA	NA	NA	NA	NA	NA	Unknown protein
Cla97C02G034000	927	7.88578	0	-5.37933	0.000346361	0.00141452	Down	K23050 PCBER1; phenylcoumaran benzylic ether reductase [EC:1.3.1.-]	NA	NA	NA	NA	isoflavone	isoflavone reductase-like protein
Cla97C02G035290	2745	99.4258	36.0801	-1.45994	2.52e-07	1.96e-06	Down	NA	NA	GO:0003674;GO:0003676;GO:0003723;GO:0003824;GO:0004518;GO:0004519;GO:0005488;GO:0016787;GO:0016788;GO:0097159;GO:1901363;	GO:0006139;GO:0006725;GO:0006807;GO:0008150;GO:0008152;GO:0009451;GO:0009987;GO:0016070;GO:0034641;GO:0043170;GO:0043412;GO:0044237;GO:0044238;GO:0046483;GO:0071704;GO:0090304;GO:0090305;GO:1901360;	GO:0005575;GO:0005622;GO:0005623;GO:0043226;GO:0043227;GO:0043229;GO:0043231;GO:0044424;GO:0044464;	PPR repeat	Pentatricopeptide repeat-containing protein
Cla97C02G035460	2241	91.5962	17.3181	-2.39635	3e-14	6.08e-13	Down	NA	NA	GO:0003674;GO:0003824;GO:0016740;GO:0016757;GO:0016758;GO:0016759;GO:0046527;	GO:0000271;GO:0000278;GO:0000281;GO:0000910;GO:0005975;GO:0005976;GO:0006073;GO:0007049;GO:0007275;GO:0008150;GO:0008152;GO:0009058;GO:0009059;GO:0009250;GO:0009653;GO:0009832;GO:0009833;GO:0009888;GO:0009987;GO:0010015;GO:0010053;GO:0010054;GO:0016049;GO:0016051;GO:0021700;GO:0022402;GO:0022622;GO:0030154;GO:0030243;GO:0030244;GO:0032501;GO:0032502;GO:0033692;GO:0034637;GO:0034645;GO:0040007;GO:…	GO:0005575;GO:0005622;GO:0005623;GO:0005737;GO:0005794;GO:0005886;GO:0012505;GO:0016020;GO:0043226;GO:0043227;GO:0043229;GO:0043231;GO:0044424;GO:0044444;GO:0044464;GO:0071944;	Belongs to the glycosyltransferase 2 family	cellulose synthase-like protein H1
Cla97C02G035990	282	26.6961	3.70462	-2.92094	1.56e-05	8.71e-05	Down	NA	NA	NA	NA	NA	NA	Unknown protein
Cla97C02G036020	1341	210.942	93.1753	-1.18192	3.53e-12	5.59e-11	Down	NA	NA	GO:0003674;GO:0003700;GO:0140110;	GO:0006355;GO:0006996;GO:0008150;GO:0009657;GO:0009658;GO:0009889;GO:0009891;GO:0009893;GO:0009909;GO:0009910;GO:0009987;GO:0010380;GO:0010468;GO:0010556;GO:0010557;GO:0010604;GO:0010628;GO:0010638;GO:0016043;GO:0019219;GO:0019222;GO:0031323;GO:0031325;GO:0031326;GO:0031328;GO:0033043;GO:0045893;GO:0045935;GO:0048518;GO:0048519;GO:0048522;GO:0048580;GO:0048581;GO:0048831;GO:0050789;GO:0050793;GO:…	GO:0005575;GO:0005622;GO:0005623;GO:0005634;GO:0043226;GO:0043227;GO:0043229;GO:0043231;GO:0044424;GO:0044464;	transcription	HTH myb-type domain-containing protein
Cla97C02G036820	633	103.132	35.5338	-1.53969	3.4e-09	3.63e-08	Down	K22522 LOG; cytokinin riboside 5'-monophosphate phosphoribohydrolase [EC:3.2.2.-]	NA	NA	NA	NA	Cytokinin-activating enzyme working in the direct activation pathway. Phosphoribohydrolase that converts inactive cytokinin nucleotides to the biologically active free-base forms	Cytokinin riboside 5'-monophosphate phosphoribohydrolase
Cla97C02G037350	1461	243.282	119.021	-1.02839	4.57e-11	6.27e-10	Down	K13946 AUX1, LAX; auxin influx carrier (AUX1 LAX family)	ko04075:Plant hormone signal transduction	GO:0003674;GO:0005215;GO:0005342;GO:0008509;GO:0008514;GO:0015075;GO:0015171;GO:0015318;GO:0022857;GO:0046943;	GO:0000003;GO:0003002;GO:0003006;GO:0003333;GO:0006810;GO:0006811;GO:0006820;GO:0006865;GO:0007275;GO:0007389;GO:0008150;GO:0009605;GO:0009607;GO:0009624;GO:0009653;GO:0009790;GO:0009791;GO:0009793;GO:0009965;GO:0010016;GO:0010051;GO:0010154;GO:0010588;GO:0015711;GO:0015849;GO:0022414;GO:0022622;GO:0032501;GO:0032502;GO:0034220;GO:0043207;GO:0046942;GO:0048316;GO:0048364;GO:0048366;GO:0048367;GO:…	GO:0005575;GO:0005623;GO:0005886;GO:0016020;GO:0044464;GO:0071944;	Auxin transporter-like protein	auxin transporter-like protein 2
Cla97C02G037500	1620	153.985	50.2648	-1.61312	1.89e-14	3.96e-13	Down	NA	NA	NA	NA	GO:0005575;GO:0005622;GO:0005623;GO:0005737;GO:0005768;GO:0010008;GO:0012505;GO:0016020;GO:0031090;GO:0031410;GO:0031982;GO:0043226;GO:0043227;GO:0043229;GO:0044422;GO:0044424;GO:0044433;GO:0044440;GO:0044444;GO:0044446;GO:0044464;GO:0097708;GO:0098588;GO:0098805;	lipid transport	Synaptotagmin-1-like
Cla97C02G037940	558	38.2365	11.3925	-1.73268	0.00010949	0.000503542	Down	NA	NA	NA	NA	NA	NA	Unknown protein
Cla97C02G037960	405	27.9312	9.88868	-1.4707	0.0031081	0.00986636	Down	NA	NA	NA	NA	NA	NA	Unknown protein
Cla97C02G038250	1464	9.45565	1.32855	-2.80656	0.00843885	0.0234136	Down	NA	NA	GO:0001871;GO:0003674;GO:0003824;GO:0004553;GO:0005488;GO:0016787;GO:0016798;GO:0030246;GO:0030247;	GO:0008150;GO:0009664;GO:0009987;GO:0016043;GO:0045229;GO:0071554;GO:0071555;GO:0071669;GO:0071840;	GO:0005575;GO:0005576;GO:0005623;GO:0005886;GO:0005911;GO:0009506;GO:0016020;GO:0030054;GO:0031224;GO:0031225;GO:0031226;GO:0044425;GO:0044459;GO:0044464;GO:0046658;GO:0048046;GO:0055044;GO:0071944;	Belongs to the glycosyl hydrolase 17 family	(1->3)-beta-glucan endohydrolase
Cla97C02G038390	195	8.65481	0.300799	-4.54731	0.00169555	0.00579206	Down	NA	NA	NA	NA	NA	NA	Unknown protein
Cla97C02G039280	351	9.12085	0.726951	-3.70807	0.00446958	0.0135304	Down	NA	NA	NA	NA	NA	NA	Unknown protein
Cla97C02G039840	1530	26.5574	3.73495	-2.74776	4.3e-05	0.000216057	Down	K24193 STP; MFS transporter, SP family, sugar:H+ symporter	NA	GO:0003674;GO:0005215;GO:0005351;GO:0005354;GO:0005355;GO:0005356;GO:0005402;GO:0008324;GO:0009679;GO:0015075;GO:0015077;GO:0015078;GO:0015144;GO:0015145;GO:0015149;GO:0015291;GO:0015293;GO:0015294;GO:0015295;GO:0015318;GO:0015578;GO:0022804;GO:0022857;GO:0022890;GO:0051119;GO:0055055;GO:0055056;	GO:0001678;GO:0006810;GO:0006811;GO:0006812;GO:0008150;GO:0008643;GO:0008645;GO:0009743;GO:0009746;GO:0009749;GO:0009987;GO:0010033;GO:0015672;GO:0015749;GO:0015757;GO:0015761;GO:0019725;GO:0033500;GO:0034219;GO:0034220;GO:0034284;GO:0042221;GO:0042592;GO:0042593;GO:0046323;GO:0048878;GO:0050896;GO:0051179;GO:0051234;GO:0051716;GO:0055082;GO:0055085;GO:0065007;GO:0065008;GO:0070887;GO:0071310;GO:…	GO:0005575;GO:0005623;GO:0005886;GO:0016020;GO:0044464;GO:0071944;	Belongs to the major facilitator superfamily. Sugar transporter (TC 2.A.1.1) family	Sugar transport protein 10-like
Cla97C02G039850	1542	39.1194	5.42697	-2.78618	5.87e-07	4.28e-06	Down	K24193 STP; MFS transporter, SP family, sugar:H+ symporter	NA	GO:0003674;GO:0005215;GO:0005351;GO:0005354;GO:0005355;GO:0005356;GO:0005402;GO:0008324;GO:0009679;GO:0015075;GO:0015077;GO:0015078;GO:0015144;GO:0015145;GO:0015149;GO:0015291;GO:0015293;GO:0015294;GO:0015295;GO:0015318;GO:0015578;GO:0022804;GO:0022857;GO:0022890;GO:0051119;GO:0055055;GO:0055056;	GO:0001678;GO:0006810;GO:0006811;GO:0006812;GO:0008150;GO:0008643;GO:0008645;GO:0009743;GO:0009746;GO:0009749;GO:0009987;GO:0010033;GO:0015672;GO:0015749;GO:0015757;GO:0015761;GO:0019725;GO:0033500;GO:0034219;GO:0034220;GO:0034284;GO:0042221;GO:0042592;GO:0042593;GO:0046323;GO:0048878;GO:0050896;GO:0051179;GO:0051234;GO:0051716;GO:0055082;GO:0055085;GO:0065007;GO:0065008;GO:0070887;GO:0071310;GO:…	GO:0005575;GO:0005623;GO:0005886;GO:0016020;GO:0044464;GO:0071944;	Belongs to the major facilitator superfamily. Sugar transporter (TC 2.A.1.1) family	Sugar transport protein 10-like
Cla97C02G040080	2829	464.256	222.849	-1.05264	1.45e-12	2.41e-11	Down	K10908 POLRMT, RPO41; DNA-directed RNA polymerase, mitochondrial [EC:2.7.7.6]	NA	GO:0003674;GO:0003824;GO:0003899;GO:0016740;GO:0016772;GO:0016779;GO:0034062;GO:0097747;GO:0140098;	GO:0000959;GO:0006139;GO:0006351;GO:0006390;GO:0006725;GO:0006807;GO:0008150;GO:0008152;GO:0009058;GO:0009059;GO:0009987;GO:0010467;GO:0016070;GO:0018130;GO:0019438;GO:0032774;GO:0034641;GO:0034645;GO:0034654;GO:0043170;GO:0044237;GO:0044238;GO:0044249;GO:0044260;GO:0044271;GO:0046483;GO:0071704;GO:0090304;GO:0097659;GO:0140053;GO:1901360;GO:1901362;GO:1901576;	GO:0000428;GO:0005575;GO:0005622;GO:0005623;GO:0005737;GO:0005739;GO:0009536;GO:0030880;GO:0032991;GO:0034245;GO:0043226;GO:0043227;GO:0043229;GO:0043231;GO:0044422;GO:0044424;GO:0044429;GO:0044444;GO:0044446;GO:0044464;GO:0061695;GO:0098798;GO:1902494;GO:1990234;	DNA-dependent RNA polymerase catalyzes the transcription of DNA into RNA using the four ribonucleoside triphosphates as substrates	DNA-directed RNA polymerase
Cla97C02G040340	522	26.8443	11.0943	-1.28362	0.00692259	0.0197677	Down	NA	NA	NA	NA	NA	NA	Loricrin
Cla97C02G040600	396	45.5746	12.9618	-1.8096	6.19e-06	3.71e-05	Down	NA	NA	NA	NA	NA	NA	Unknown protein
Cla97C02G040710	981	36.745	11.3426	-1.67738	0.000188725	0.00081917	Down	K05953 NAS; nicotianamine synthase [EC:2.5.1.43]	ko00270:Cysteine and methionine metabolism|ko00999:Biosynthesis of various plant secondary metabolites	NA	GO:0000003;GO:0000902;GO:0000904;GO:0003006;GO:0006810;GO:0007275;GO:0008150;GO:0009555;GO:0009653;GO:0009826;GO:0009856;GO:0009860;GO:0009932;GO:0009987;GO:0010232;GO:0010233;GO:0016043;GO:0016049;GO:0022414;GO:0030154;GO:0032501;GO:0032502;GO:0032989;GO:0040007;GO:0044706;GO:0048229;GO:0048468;GO:0048588;GO:0048589;GO:0048856;GO:0048868;GO:0048869;GO:0051179;GO:0051234;GO:0051704;GO:0060560;GO:…	NA	Nicotianamine synthase	nicotianamine synthase-like
Cla97C02G041030	918	45.6911	22.6878	-1.00443	0.00979973	0.0266309	Down	NA	NA	GO:0003674;GO:0005488;GO:0030246;	NA	GO:0005575;GO:0005622;GO:0005623;GO:0005634;GO:0005737;GO:0043226;GO:0043227;GO:0043229;GO:0043231;GO:0044424;GO:0044464;	f-box protein	F-box protein PP2-B15-like
Cla97C02G041470	2589	356.678	77.0829	-2.21776	4.67e-44	5.13e-42	Down	K15718 LOX1_5; linoleate 9S-lipoxygenase [EC:1.13.11.58]	ko00591:Linoleic acid metabolism	GO:0003674;GO:0003824;GO:0016165;GO:0016491;GO:0016701;GO:0016702;GO:0051213;	GO:0008150;GO:0008152;GO:0055114;	GO:0005575;GO:0005622;GO:0005623;GO:0005737;GO:0044424;GO:0044464;	Plant lipoxygenase may be involved in a number of diverse aspects of plant physiology including growth and development, pest resistance, and senescence or responses to wounding	Lipoxygenase
Cla97C02G041590	402	54.3551	26.8359	-1.00919	0.00235347	0.00772531	Down	NA	NA	NA	NA	NA	NA	Unknown protein
Cla97C02G041760	588	814.909	130.371	-2.64403	7.16e-103	2.26e-100	Down	NA	NA	GO:0003674;GO:0004857;GO:0004866;GO:0004867;GO:0015066;GO:0030234;GO:0030414;GO:0061134;GO:0061135;GO:0098772;	GO:0008150;GO:0009892;GO:0010466;GO:0010605;GO:0010951;GO:0019222;GO:0030162;GO:0031323;GO:0031324;GO:0032268;GO:0032269;GO:0043086;GO:0044092;GO:0045861;GO:0048519;GO:0048523;GO:0050789;GO:0050790;GO:0050794;GO:0051171;GO:0051172;GO:0051246;GO:0051248;GO:0051336;GO:0051346;GO:0052547;GO:0052548;GO:0060255;GO:0065007;GO:0065009;GO:0080090;GO:0008152;GO:0006508;GO:0006807;GO:0009987;GO:0019538;GO:…	NA	alpha-amylase subtilisin	Kunitz-type trypsin inhibitor
Cla97C02G041780	651	111.792	54.3353	-1.04833	9.71e-06	5.63e-05	Down	NA	NA	GO:0003674;GO:0004857;GO:0004866;GO:0004867;GO:0015066;GO:0030234;GO:0030414;GO:0061134;GO:0061135;GO:0098772;	GO:0008150;GO:0009892;GO:0010466;GO:0010605;GO:0010951;GO:0019222;GO:0030162;GO:0031323;GO:0031324;GO:0032268;GO:0032269;GO:0043086;GO:0044092;GO:0045861;GO:0048519;GO:0048523;GO:0050789;GO:0050790;GO:0050794;GO:0051171;GO:0051172;GO:0051246;GO:0051248;GO:0051336;GO:0051346;GO:0052547;GO:0052548;GO:0060255;GO:0065007;GO:0065009;GO:0080090;GO:0008152;GO:0006508;GO:0006807;GO:0009987;GO:0019538;GO:…	NA	alpha-amylase subtilisin	Kunitz-type trypsin inhibitor
Cla97C02G041820	3681	441.552	0	-11.1831	3.95e-21	1.49e-19	Down	NA	NA	NA	NA	NA	TMV resistance protein N-like	TIR-NBS-LRR disease resistance protein
Cla97C02G043340	258	74.7483	29.2421	-1.34985	4.87e-06	2.98e-05	Down	NA	NA	NA	NA	NA	NA	Unknown protein
Cla97C02G043470	456	22.9769	6.51721	-1.81082	0.00246835	0.00805796	Down	NA	NA	NA	NA	NA	NA	Unknown protein
Cla97C02G043610	579	126.91	12.6909	-3.32431	2.65e-25	1.34e-23	Down	NA	NA	NA	GO:0006139;GO:0006351;GO:0006725;GO:0006807;GO:0008150;GO:0008152;GO:0009058;GO:0009059;GO:0009299;GO:0009314;GO:0009416;GO:0009628;GO:0009653;GO:0009987;GO:0010467;GO:0016070;GO:0016071;GO:0018130;GO:0019438;GO:0032502;GO:0032774;GO:0034641;GO:0034645;GO:0034654;GO:0043170;GO:0044237;GO:0044238;GO:0044249;GO:0044260;GO:0044271;GO:0046483;GO:0048856;GO:0050896;GO:0071704;GO:0090304;GO:0090698;GO:…	GO:0005575;GO:0005622;GO:0005623;GO:0005634;GO:0043226;GO:0043227;GO:0043229;GO:0043231;GO:0044424;GO:0044464;	Protein LIGHT-DEPENDENT SHORT HYPOCOTYLS	Protein LIGHT-DEPENDENT SHORT HYPOCOTYLS 10-like
Cla97C02G044600	480	27.4707	6.16371	-2.15639	8.95e-05	0.000418838	Down	NA	NA	NA	NA	NA	NA	Unknown protein
Cla97C02G044930	213	76.3182	25.6475	-1.557	2.35e-06	1.53e-05	Down	NA	NA	NA	NA	NA	NA	Unknown protein
Cla97C02G045450	1764	18.8844	4.90063	-1.95942	0.00641619	0.0184859	Down	K01953 asnB, ASNS; asparagine synthase (glutamine-hydrolysing) [EC:6.3.5.4]	ko00250:Alanine, aspartate and glutamate metabolism	NA	NA	NA	Asparagine synthetase	Asparagine synthetase [glutamine-hydrolyzing]
Cla97C02G045570	4290	38.8035	2.62437	-3.83941	3.88e-09	4.11e-08	Down	K08711 PDR, CDR1; ATP-binding cassette, subfamily G (WHITE), member 2, PDR	ko02010:ABC transporters	GO:0003674;GO:0003824;GO:0005215;GO:0015399;GO:0015405;GO:0016462;GO:0016787;GO:0016817;GO:0016818;GO:0016887;GO:0017111;GO:0022804;GO:0022857;GO:0042623;GO:0042626;GO:0043492;	GO:0006810;GO:0006855;GO:0008150;GO:0015893;GO:0042221;GO:0042493;GO:0050896;GO:0051179;GO:0051234;GO:0055085;	GO:0005575;GO:0005623;GO:0005886;GO:0005911;GO:0009506;GO:0016020;GO:0016021;GO:0030054;GO:0031224;GO:0044425;GO:0044464;GO:0055044;GO:0071944;	Belongs to the ABC transporter superfamily. ABCG family. PDR (TC 3.A.1.205) subfamily	ABC transporter G family member 31-like
Cla97C02G046730	480	6.8842	0	-5.18496	0.000890206	0.00327585	Down	NA	NA	NA	NA	NA	NA	Protein kinase domain-containing protein
Cla97C02G047370	1215	3234.95	357.408	-3.18118	0	0	Down	NA	NA	NA	NA	NA	Kiwellin-like	kiwellin-like
Cla97C02G048210	1533	177.854	61.0108	-1.54849	1.47e-13	2.76e-12	Down	K14431 TGA; transcription factor TGA	ko04075:Plant hormone signal transduction	NA	NA	NA	transcription factor	bZIP transcription factor family protein
Cla97C02G048530	1164	293.626	121.23	-1.27883	6.99e-15	1.52e-13	Down	NA	NA	NA	NA	NA	Protein FAF-like, chloroplastic	protein FAF-like, chloroplastic
Cla97C02G048760	3741	160.18	63.6305	-1.32452	2e-08	1.89e-07	Down	K11886 ECM29; proteasome component ECM29	NA	NA	NA	NA	Proteasome-associated protein ECM29 homolog	proteasome-associated protein ECM29 homolog
Cla97C02G048850	363	15.9785	4.39903	-1.85217	0.00672478	0.0192708	Down	NA	NA	NA	NA	NA	NA	Unknown protein
Cla97C02G049080	306	45.1932	17.0372	-1.40354	0.000248947	0.00104951	Down	K14684 SLC25A23S; solute carrier family 25 (mitochondrial phosphate transporter), member 23/24/25/41	NA	NA	NA	NA	NA	Unknown protein
Cla97C02G049440	1095	37.3917	17.1229	-1.11516	0.00641374	0.0184815	Down	NA	NA	GO:0003674;GO:0003700;GO:0140110;	GO:0006355;GO:0008150;GO:0008152;GO:0009058;GO:0009812;GO:0009813;GO:0009889;GO:0010468;GO:0010556;GO:0019219;GO:0019222;GO:0031323;GO:0031326;GO:0050789;GO:0050794;GO:0051171;GO:0051252;GO:0060255;GO:0065007;GO:0071704;GO:0080090;GO:1901576;GO:1903506;GO:2000112;GO:2001141;GO:0006139;GO:0006351;GO:0006725;GO:0006807;GO:0009059;GO:0009987;GO:0010467;GO:0016070;GO:0018130;GO:0019438;GO:0032774;GO:…	GO:0005575;GO:0005622;GO:0005623;GO:0005634;GO:0043226;GO:0043227;GO:0043229;GO:0043231;GO:0044424;GO:0044464;	Protein TRANSPARENT TESTA 1-like	zinc finger protein WIP2-like
Cla97C02G050080	333	31.5369	8.78827	-1.80496	0.000357304	0.00145422	Down	K13095 SF1; splicing factor 1	NA	NA	NA	NA	K homology RNA-binding domain	splicing factor 1 isoform X1
Cla97C02G050740	1659	30.7525	4.50182	-2.7166	7.19e-06	4.26e-05	Down	K00423 E1.10.3.3; L-ascorbate oxidase [EC:1.10.3.3]	ko00053:Ascorbate and aldarate metabolism	NA	NA	NA	L-ascorbate oxidase homolog	L-ascorbate oxidase-like protein
Cla97C02G050750	1659	20.5664	4.42916	-2.16158	0.00222394	0.00736944	Down	K00423 E1.10.3.3; L-ascorbate oxidase [EC:1.10.3.3]	ko00053:Ascorbate and aldarate metabolism	NA	NA	NA	L-ascorbate oxidase homolog	L-ascorbate oxidase-like protein
Cla97C02G050760	1656	23.7685	5.67768	-2.05056	0.00153804	0.00531501	Down	K00423 E1.10.3.3; L-ascorbate oxidase [EC:1.10.3.3]	ko00053:Ascorbate and aldarate metabolism	NA	NA	NA	L-ascorbate oxidase homolog	L-ascorbate oxidase-like protein
Cla97C03G050890	522	27.6239	5.54215	-2.32551	3.83e-05	0.000195241	Down	NA	NA	NA	NA	NA	NA	Unknown protein
Cla97C03G052160	249	56.0066	14.1522	-1.97214	2.61e-07	2.03e-06	Down	NA	NA	NA	NA	NA	NA	Unknown protein
Cla97C03G052300	321	22.4377	8.84077	-1.33819	0.0118356	0.0313304	Down	NA	NA	NA	NA	NA	NA	Unknown protein
Cla97C03G053870	288	14.3771	2.95771	-2.34168	0.00459873	0.013853	Down	NA	NA	NA	NA	NA	NA	Unknown protein
Cla97C03G053970	252	158.502	51.8085	-1.61303	1.06e-13	2.02e-12	Down	NA	NA	NA	NA	NA	NA	Unknown protein
Cla97C03G054440	189	92.5144	33.7441	-1.44082	5.57e-07	4.09e-06	Down	NA	NA	NA	NA	NA	NA	Unknown protein
Cla97C03G055130	900	27.0982	12.0166	-1.17163	0.0113448	0.0302374	Down	K15382 SLC50A, SWEET; solute carrier family 50 (sugar transporter)	NA	GO:0003674;GO:0005215;GO:0008515;GO:0015144;GO:0015154;GO:0015157;GO:0022857;GO:0051119;	GO:0000003;GO:0003006;GO:0006810;GO:0007275;GO:0008150;GO:0008643;GO:0009790;GO:0009791;GO:0009793;GO:0009987;GO:0010154;GO:0010431;GO:0015766;GO:0015770;GO:0015772;GO:0016043;GO:0021700;GO:0022414;GO:0022607;GO:0032501;GO:0032502;GO:0032504;GO:0034219;GO:0043933;GO:0044085;GO:0048316;GO:0048608;GO:0048609;GO:0048731;GO:0048856;GO:0051179;GO:0051234;GO:0051259;GO:0051260;GO:0055085;GO:0061458;GO:…	GO:0005575;GO:0005623;GO:0005886;GO:0005887;GO:0016020;GO:0016021;GO:0031224;GO:0031226;GO:0044425;GO:0044459;GO:0044464;GO:0071944;	Mediates both low-affinity uptake and efflux of sugar across the membrane	Bidirectional sugar transporter SWEET
Cla97C03G055770	1071	7.4083	0.726951	-3.4086	0.0114918	0.0305522	Down	NA	NA	NA	NA	NA	NA	glycine-rich cell wall structural protein 1-like
Cla97C03G056740	525	121.241	46.5127	-1.38433	7.52e-09	7.61e-08	Down	NA	NA	NA	NA	NA	Protein MOTHER of FT and TF 1-like	protein MOTHER of FT and TFL1-like
Cla97C03G056800	1560	619.509	292.859	-1.08075	1.12e-27	6.49e-26	Down	K24193 STP; MFS transporter, SP family, sugar:H+ symporter	NA	NA	NA	NA	Belongs to the major facilitator superfamily. Sugar transporter (TC 2.A.1.1) family	Sugar transporter, putative
Cla97C03G057140	1770	3572.53	800.494	-2.1585	8.33e-289	1.4e-285	Down	K00422 E1.10.3.1; polyphenol oxidase [EC:1.10.3.1]	ko00350:Tyrosine metabolism|ko00950:Isoquinoline alkaloid biosynthesis	NA	NA	GO:0005575;GO:0005622;GO:0005623;GO:0005737;GO:0009507;GO:0009534;GO:0009536;GO:0009543;GO:0009579;GO:0031976;GO:0031977;GO:0031978;GO:0031984;GO:0043226;GO:0043227;GO:0043229;GO:0043231;GO:0044422;GO:0044424;GO:0044434;GO:0044435;GO:0044436;GO:0044444;GO:0044446;GO:0044464;	Polyphenol oxidase	polyphenol oxidase, chloroplastic-like
Cla97C03G057390	474	94.332	43.0537	-1.12101	1.57e-05	8.72e-05	Down	NA	NA	NA	NA	NA	PDDEXK-like family of unknown function	Protein of unknown function (DUF506)
Cla97C03G058470	1083	2129.83	430.991	-2.30226	4.8e-165	4.22e-162	Down	NA	NA	NA	NA	NA	NA	Enolase-phosphatase E1
Cla97C03G059720	1626	866.11	72.539	-3.57666	2.95e-156	2.21e-153	Down	NA	NA	NA	NA	NA	Belongs to the oxygen-dependent FAD-linked oxidoreductase family	berberine bridge enzyme-like 18
Cla97C03G061160	2624	367.712	134.509	-1.44464	1.33e-20	4.82e-19	Down	K11592 DICER1, DCR1; endoribonuclease Dicer [EC:3.1.26.-]	NA	GO:0003674;GO:0003676;GO:0003723;GO:0003824;GO:0004518;GO:0004519;GO:0004521;GO:0004525;GO:0004540;GO:0005488;GO:0016787;GO:0016788;GO:0016891;GO:0016893;GO:0032296;GO:0097159;GO:0140098;GO:1901363;	GO:0002252;GO:0002376;GO:0006139;GO:0006259;GO:0006396;GO:0006725;GO:0006807;GO:0006950;GO:0006952;GO:0006955;GO:0008150;GO:0008152;GO:0009605;GO:0009607;GO:0009615;GO:0009616;GO:0009892;GO:0009987;GO:0010033;GO:0010216;GO:0010267;GO:0010467;GO:0010468;GO:0010605;GO:0010608;GO:0010629;GO:0014070;GO:0016070;GO:0016246;GO:0016441;GO:0016458;GO:0019222;GO:0030422;GO:0031047;GO:0031050;GO:0034641;GO:…	GO:0005575;GO:0005622;GO:0005623;GO:0005634;GO:0005737;GO:0016442;GO:0031332;GO:0032991;GO:0043226;GO:0043227;GO:0043229;GO:0043231;GO:0044424;GO:0044464;GO:1990904;	Belongs to the helicase family. Dicer subfamily	endoribonuclease Dicer homolog 2-like
Cla97C03G061390	270	40.84	18.5113	-1.13188	0.00352062	0.010988	Down	NA	NA	NA	NA	NA	NA	Unknown protein
Cla97C03G061750	654	5.92305	0.300799	-3.99267	0.0103912	0.0279872	Down	NA	NA	NA	NA	NA	Germin-like protein subfamily 1 member	Germin-like protein
Cla97C03G062000	2703	45.6225	0	-7.90873	1.59e-10	2.02e-09	Down	NA	NA	NA	NA	NA	beta-galactosidase	Beta-galactosidase
Cla97C03G062800	828	337.947	141.653	-1.25995	1.6e-18	4.82e-17	Down	K09419 HSFF; heat shock transcription factor, other eukaryote	NA	GO:0003674;GO:0003700;GO:0140110;	GO:0006355;GO:0008150;GO:0008356;GO:0009889;GO:0009987;GO:0010468;GO:0010556;GO:0019219;GO:0019222;GO:0031323;GO:0031326;GO:0050789;GO:0050794;GO:0051171;GO:0051252;GO:0051301;GO:0060255;GO:0065007;GO:0080090;GO:1903506;GO:2000112;GO:2001141;GO:0008152;GO:0006139;GO:0006351;GO:0006725;GO:0006807;GO:0009058;GO:0009059;GO:0010467;GO:0016070;GO:0018130;GO:0019438;GO:0032774;GO:0034641;GO:0034645;GO:…	NA	Heat stress transcription factor	Heat stress transcription factor B-4b-like
Cla97C03G062960	273	27.7681	6.98347	-1.97043	0.000437395	0.00174372	Down	NA	NA	NA	NA	NA	NA	Unknown protein
Cla97C03G064260	513	3.9557	0	-4.37229	0.0130877	0.0341359	Down	NA	NA	NA	NA	GO:0005575;GO:0005622;GO:0005623;GO:0005737;GO:0005773;GO:0005886;GO:0016020;GO:0031224;GO:0031225;GO:0031226;GO:0043226;GO:0043227;GO:0043229;GO:0043231;GO:0044424;GO:0044425;GO:0044444;GO:0044459;GO:0044464;GO:0046658;GO:0071944;	Lamin-like	lamin-like protein
Cla97C03G064290	516	33.3792	15.3454	-1.10875	0.0147327	0.0378126	Down	NA	NA	NA	NA	NA	NA	Unknown protein
Cla97C03G064530	381	113.269	52.2658	-1.09948	7.39e-05	0.000351995	Down	NA	NA	NA	NA	NA	NA	Unknown protein
Cla97C03G065350	705	1916.68	639.339	-1.58141	2.8e-122	1.23e-119	Down	NA	NA	NA	GO:0006950;GO:0008150;GO:0009266;GO:0009409;GO:0009628;GO:0009719;GO:0009725;GO:0009735;GO:0010033;GO:0042221;GO:0050896;	GO:0005575;GO:0005576;GO:0005618;GO:0005622;GO:0005623;GO:0005634;GO:0009505;GO:0030312;GO:0031012;GO:0043226;GO:0043227;GO:0043229;GO:0043231;GO:0044421;GO:0044424;GO:0044464;GO:0048046;GO:0071944;	Auxin-binding protein	Germin-like protein
Cla97C03G065440	1536	12.3446	1.62935	-2.87065	0.00300188	0.00957272	Down	NA	NA	NA	NA	NA	Belongs to the cytochrome P450 family	cytochrome P450 CYP72A219-like
Cla97C03G065830	573	38.6444	13.6961	-1.48043	0.00051759	0.00202513	Down	K24939 CWF19L1, DRN1; CWF19-like protein 1	NA	NA	NA	GO:0005575;GO:0005622;GO:0005623;GO:0005737;GO:0005829;GO:0044424;GO:0044444;GO:0044464;	zinc finger CCCH domain-containing protein	zinc finger CCCH domain-containing protein 64
Cla97C03G065900	282	29.5542	7.58507	-1.93171	0.000212209	0.000908056	Down	NA	NA	NA	NA	NA	NA	Unknown protein
Cla97C03G066500	1218	94.0439	34.702	-1.42705	9.8e-06	5.67e-05	Down	K11699 RDR, RDRP; RNA-dependent RNA polymerase [EC:2.7.7.48]	NA	NA	NA	NA	Probably involved in the RNA silencing pathway and required for the generation of small interfering RNAs (siRNAs)	RNA-dependent RNA polymerase
Cla97C03G066610	1551	85.2781	20.4714	-2.042	5.8e-11	7.87e-10	Down	NA	NA	NA	NA	NA	Belongs to the cytochrome P450 family	cytochrome P450 CYP72A219-like
Cla97C03G067660	321	5.41439	0.300799	-3.87275	0.0139181	0.0359818	Down	NA	NA	GO:0003674;GO:0005102;GO:0005179;GO:0005488;GO:0005515;GO:0030545;GO:0048018;GO:0098772;	GO:0007154;GO:0007165;GO:0007267;GO:0008150;GO:0009966;GO:0009987;GO:0010469;GO:0010646;GO:0019722;GO:0019932;GO:0023051;GO:0023052;GO:0035556;GO:0048583;GO:0050789;GO:0050794;GO:0050896;GO:0051716;GO:0065007;GO:0065009;	GO:0005575;GO:0005576;GO:0048046;	Rapid ALkalinization Factor (RALF)	protein RALF-like 9
Cla97C03G067810	1281	452.532	5.3667	-6.45701	5.99e-61	1.16e-58	Down	NA	NA	NA	NA	NA	Calmodulin-binding protein	Calmodulin-binding protein 60 G-like
Cla97C04G068690	2475	8.15571	0.300799	-4.4566	0.00231759	0.00762113	Down	NA	NA	NA	NA	NA	beta-galactosidase	Beta-galactosidase
Cla97C04G068710	1518	4.38068	0	-4.53335	0.00804477	0.0224681	Down	K24188 CYP93A; cytochrome P450 family 93 subfamily A [EC:1.14.-.-]	NA	GO:0003674;GO:0003824;GO:0004497;GO:0016491;GO:0016705;GO:0016709;	GO:0008150;GO:0008152;GO:0009058;GO:0019748;GO:0044550;GO:0055114;	GO:0005575;GO:0016020;	Cytochrome p450	cytochrome P450 93A2-like
Cla97C04G069570	1374	24.1391	2.41898	-3.32555	7.57e-06	4.47e-05	Down	K14498 SNRK2; serine/threonine-protein kinase SRK2 [EC:2.7.11.1]	ko04016:MAPK signaling pathway - plant|ko04075:Plant hormone signal transduction	GO:0003674;GO:0003676;GO:0003723;GO:0003729;GO:0003824;GO:0004672;GO:0004674;GO:0005488;GO:0016301;GO:0016740;GO:0016772;GO:0016773;GO:0097159;GO:0140096;GO:1901363;	GO:0006464;GO:0006468;GO:0006793;GO:0006796;GO:0006807;GO:0006950;GO:0006970;GO:0007154;GO:0007165;GO:0008150;GO:0008152;GO:0009628;GO:0009651;GO:0009987;GO:0016310;GO:0019538;GO:0023052;GO:0035556;GO:0036211;GO:0043170;GO:0043412;GO:0044237;GO:0044238;GO:0044260;GO:0044267;GO:0050789;GO:0050794;GO:0050896;GO:0051716;GO:0065007;GO:0071704;GO:1901564;	GO:0005575;GO:0005622;GO:0005623;GO:0005634;GO:0005737;GO:0043226;GO:0043227;GO:0043229;GO:0043231;GO:0044424;GO:0044464;	Belongs to the protein kinase superfamily	Protein kinase
Cla97C04G069810	378	53.1161	21.8953	-1.26757	0.000222436	0.000948809	Down	NA	NA	NA	NA	NA	NA	Unknown protein
Cla97C04G070470	243	251.898	122.095	-1.03449	1.83e-07	1.46e-06	Down	NA	NA	NA	NA	NA	NA	Unknown protein
Cla97C04G070540	831	86.7998	33.6435	-1.3756	5.49e-07	4.03e-06	Down	NA	NA	NA	NA	NA	Protein of unknown function, DUF617	protein MIZU-KUSSEI 1-like
Cla97C04G071350	645	7.26006	0	-5.25993	0.000542521	0.00211125	Down	NA	NA	NA	NA	NA	NA	Proline-rich protein HaeIII subfamily 1-like
Cla97C04G071360	666	12.5469	0.746913	-4.17027	0.000685431	0.00258779	Down	NA	NA	NA	NA	NA	NA	Proline-rich protein HaeIII subfamily 1-like
Cla97C04G072470	696	226.808	97.0161	-1.21185	5.29e-09	5.49e-08	Down	K00705 malQ; 4-alpha-glucanotransferase [EC:2.4.1.25]	ko00500:Starch and sucrose metabolism	GO:0001871;GO:0003674;GO:0003824;GO:0004133;GO:0004134;GO:0005488;GO:0010297;GO:0016740;GO:0016757;GO:0016758;GO:0030246;GO:0030247;	GO:0000023;GO:0000025;GO:0000272;GO:0005975;GO:0005976;GO:0005977;GO:0005982;GO:0005983;GO:0005984;GO:0006073;GO:0006091;GO:0006112;GO:0008150;GO:0008152;GO:0009056;GO:0009057;GO:0009251;GO:0009311;GO:0009313;GO:0009987;GO:0015980;GO:0016052;GO:0043170;GO:0044042;GO:0044237;GO:0044238;GO:0044247;GO:0044248;GO:0044260;GO:0044262;GO:0044264;GO:0044275;GO:0046352;GO:0055114;GO:0071704;GO:1901575;	GO:0005575;GO:0005622;GO:0005623;GO:0005737;GO:0005829;GO:0044424;GO:0044444;GO:0044464;	4-alpha-glucanotransferase	Amylomaltase
Cla97C04G072890	213	17.246	5.52957	-1.60608	0.0143321	0.0369154	Down	NA	NA	NA	NA	NA	NA	Unknown protein
Cla97C04G072980	267	20.2841	6.81801	-1.56706	0.00612535	0.0177717	Down	NA	NA	NA	NA	NA	NA	Unknown protein
Cla97C04G073690	303	30.6904	7.20144	-2.0962	5.53e-05	0.000271799	Down	NA	NA	NA	NA	NA	NA	Unknown protein
Cla97C04G073880	237	66.5175	32.8517	-1.00572	0.00101412	0.00367252	Down	NA	NA	NA	NA	NA	NA	Unknown protein
Cla97C04G074130	666	14.4562	2.55171	-2.44015	0.00298145	0.00951657	Down	K00799 GST, gst; glutathione S-transferase [EC:2.5.1.18]	ko00480:Glutathione metabolism	GO:0003674;GO:0003824;GO:0004364;GO:0016740;GO:0016765;	GO:0001101;GO:0006518;GO:0006575;GO:0006749;GO:0006790;GO:0006807;GO:0006950;GO:0008150;GO:0008152;GO:0009056;GO:0009266;GO:0009404;GO:0009407;GO:0009408;GO:0009628;GO:0009636;GO:0009719;GO:0009725;GO:0009733;GO:0009735;GO:0009737;GO:0009739;GO:0009987;GO:0010033;GO:0010035;GO:0010038;GO:0019748;GO:0033993;GO:0034641;GO:0042221;GO:0043603;GO:0044237;GO:0044248;GO:0046686;GO:0050896;GO:0051186;GO:…	GO:0005575;GO:0005622;GO:0005623;GO:0005737;GO:0044424;GO:0044464;	Belongs to the GST superfamily	Glutathione S-transferase family protein
Cla97C04G074250	669	94.0963	37.5414	-1.31511	7e-07	5.03e-06	Down	K00799 GST, gst; glutathione S-transferase [EC:2.5.1.18]	ko00480:Glutathione metabolism	GO:0003674;GO:0003824;GO:0004364;GO:0016740;GO:0016765;	GO:0001101;GO:0006518;GO:0006575;GO:0006749;GO:0006790;GO:0006807;GO:0006950;GO:0008150;GO:0008152;GO:0009056;GO:0009266;GO:0009404;GO:0009407;GO:0009408;GO:0009628;GO:0009636;GO:0009719;GO:0009725;GO:0009733;GO:0009735;GO:0009737;GO:0009739;GO:0009987;GO:0010033;GO:0010035;GO:0010038;GO:0019748;GO:0033993;GO:0034641;GO:0042221;GO:0043603;GO:0044237;GO:0044248;GO:0046686;GO:0050896;GO:0051186;GO:…	GO:0005575;GO:0005622;GO:0005623;GO:0005737;GO:0044424;GO:0044464;	Belongs to the GST superfamily	glutathione S-transferase U8-like
Cla97C04G074300	201	31.3257	12.4202	-1.32154	0.00318075	0.0100586	Down	NA	NA	NA	NA	NA	NA	Unknown protein
Cla97C04G077030	384	58.4165	18.6769	-1.62252	7.22e-05	0.000344888	Down	NA	NA	NA	NA	NA	NA	Unknown protein
Cla97C04G077500	1203	413.959	178.495	-1.21279	4.9e-23	2.13e-21	Down	NA	NA	GO:0003674;GO:0003700;GO:0140110;	GO:0000003;GO:0001558;GO:0003006;GO:0006355;GO:0007275;GO:0008150;GO:0009553;GO:0009561;GO:0009653;GO:0009790;GO:0009791;GO:0009889;GO:0009908;GO:0009965;GO:0009987;GO:0010016;GO:0010468;GO:0010556;GO:0019219;GO:0019222;GO:0022414;GO:0022603;GO:0022604;GO:0031323;GO:0031326;GO:0032501;GO:0032502;GO:0035670;GO:0040008;GO:0048229;GO:0048314;GO:0048366;GO:0048367;GO:0048437;GO:0048438;GO:0048440;GO:…	GO:0005575;GO:0005622;GO:0005623;GO:0005634;GO:0005737;GO:0005829;GO:0043226;GO:0043227;GO:0043229;GO:0043231;GO:0044424;GO:0044444;GO:0044464;GO:0048353;	WUSCHEL-related homeobox	WUSCHEL-related homeobox 1-like
Cla97C04G077960	876	30.1477	9.81583	-1.60936	0.000657133	0.00249725	Down	K09422 MYBP; transcription factor MYB, plant	NA	GO:0000981;GO:0001067;GO:0001134;GO:0001135;GO:0003674;GO:0003676;GO:0003677;GO:0003700;GO:0005488;GO:0043565;GO:0044212;GO:0097159;GO:0140110;GO:1901363;GO:0005515;GO:0008134;	GO:0000003;GO:0001101;GO:0003006;GO:0006355;GO:0006357;GO:0007154;GO:0007165;GO:0007275;GO:0008150;GO:0009719;GO:0009725;GO:0009739;GO:0009740;GO:0009753;GO:0009755;GO:0009791;GO:0009867;GO:0009889;GO:0009908;GO:0009987;GO:0010033;GO:0010468;GO:0010476;GO:0010556;GO:0019219;GO:0019222;GO:0022414;GO:0023052;GO:0030154;GO:0031323;GO:0031326;GO:0032501;GO:0032502;GO:0032870;GO:0033993;GO:0042221;GO:…	GO:0005575;GO:0005622;GO:0005623;GO:0005634;GO:0043226;GO:0043227;GO:0043229;GO:0043231;GO:0044424;GO:0044464;	transcription factor	transcription factor MYB108-like
Cla97C04G078540	243	48.417	22.5768	-1.0905	0.00247012	0.00806246	Down	NA	NA	NA	NA	NA	NA	Unknown protein
Cla97C04G079590	213	36.5118	17.4536	-1.05183	0.00824284	0.0229579	Down	NA	NA	NA	NA	NA	NA	Unknown protein
Cla97C04G079760	279	38.7192	11.3725	-1.75195	0.000217388	0.000929039	Down	NA	NA	NA	NA	NA	NA	Unknown protein
Cla97C05G080050	294	67.1803	26.0365	-1.35207	4.74e-05	0.000235989	Down	NA	NA	NA	NA	NA	NA	Unknown protein
Cla97C05G080150	4656	205.488	91.8974	-1.15869	1.78e-08	1.69e-07	Down	NA	NA	NA	NA	NA	Nucleotidyltransferase domain	NTP_transf_2 domain-containing protein
Cla97C05G081020	453	75.1708	34.7517	-1.10229	9.84e-05	0.000457702	Down	NA	NA	NA	NA	NA	Nonspecific lipid-transfer protein	non-specific lipid-transfer protein-like
Cla97C05G081050	894	105.007	50.6686	-1.04282	1.16e-05	6.6e-05	Down	K05391 CNGC; cyclic nucleotide gated channel, plant	ko04626:Plant-pathogen interaction	NA	NA	NA	Cyclic nucleotide-gated ion channel 1-like	cyclic nucleotide-gated ion channel 1-like
Cla97C05G081190	303	28.6171	10.9063	-1.39066	0.00641233	0.0184815	Down	NA	NA	NA	NA	NA	NA	Unknown protein
Cla97C05G081440	348	7.03182	0.300799	-4.24873	0.00443811	0.0134472	Down	NA	NA	NA	NA	NA	NA	Unknown protein
Cla97C05G082080	1806	39.3282	8.97351	-2.10987	1.43e-05	8.05e-05	Down	NA	NA	GO:0003674;GO:0003676;GO:0003723;GO:0003824;GO:0004518;GO:0004519;GO:0005488;GO:0016787;GO:0016788;GO:0097159;GO:1901363;	GO:0006139;GO:0006725;GO:0006807;GO:0008150;GO:0008152;GO:0009451;GO:0009987;GO:0016070;GO:0034641;GO:0043170;GO:0043412;GO:0044237;GO:0044238;GO:0046483;GO:0071704;GO:0090304;GO:0090305;GO:1901360;	GO:0005575;GO:0005622;GO:0005623;GO:0043226;GO:0043227;GO:0043229;GO:0043231;GO:0044424;GO:0044464;	Pentatricopeptide repeat-containing protein	Pentatricopeptide repeat-containing protein
Cla97C05G082110	219	13.6393	3.94294	-1.7552	0.0194733	0.0479372	Down	NA	NA	NA	NA	NA	NA	Unknown protein
Cla97C05G082940	1530	222.888	76.331	-1.54278	2.48e-18	7.33e-17	Down	K01051 E3.1.1.11; pectinesterase [EC:3.1.1.11]	ko00040:Pentose and glucuronate interconversions	GO:0003674;GO:0003824;GO:0004857;GO:0016787;GO:0016788;GO:0030234;GO:0030599;GO:0046910;GO:0052689;GO:0098772;	GO:0008150;GO:0043086;GO:0044092;GO:0050790;GO:0065007;GO:0065009;	GO:0005575;GO:0005623;GO:0044464;GO:0071944;	Acts in the modification of cell walls via demethylesterification of cell wall pectin	Pectinesterase
Cla97C05G084170	330	66.7359	25.9311	-1.34757	9.45e-05	0.000440798	Down	NA	NA	NA	NA	NA	NA	Unknown protein
Cla97C05G084690	375	25.6509	9.9312	-1.36812	0.00510215	0.0151752	Down	NA	NA	NA	NA	NA	NA	Unknown protein
Cla97C05G085120	1578	40.8706	19.8724	-1.03832	0.00526884	0.0156045	Down	K08176 PHO84; MFS transporter, PHS family, inorganic phosphate transporter	NA	GO:0003674;GO:0005215;GO:0005315;GO:0008509;GO:0015075;GO:0015291;GO:0015318;GO:0022804;GO:0022857;GO:1901683;	GO:0006810;GO:0006811;GO:0006820;GO:0008150;GO:0034220;GO:0051179;GO:0051234;GO:0055085;GO:0098656;GO:1901684;	GO:0005575;GO:0005623;GO:0005886;GO:0005887;GO:0016020;GO:0016021;GO:0031224;GO:0031226;GO:0044425;GO:0044459;GO:0044464;GO:0071944;	Inorganic phosphate transporter	Inorganic phosphate transporter 1-1
Cla97C05G085470	216	1618.85	303.093	-2.41796	6.8e-200	7.64e-197	Down	NA	NA	NA	NA	NA	inhibitor	Protease inhibitor protein
Cla97C05G085530	306	17.0017	3.54933	-2.2898	0.00124338	0.00440504	Down	NA	NA	NA	NA	NA	NA	Unknown protein
Cla97C05G086070	243	53.949	25.868	-1.05769	0.00124416	0.00440705	Down	NA	NA	NA	NA	NA	NA	Unknown protein
Cla97C05G086180	651	24.2932	10.4901	-1.20425	0.0152196	0.0388847	Down	NA	NA	NA	NA	NA	Non-specific lipid-transfer protein-like protein	Non-specific lipid-transfer protein-like protein
Cla97C05G086610	1002	80.0447	28.0287	-1.52233	2.41e-07	1.89e-06	Down	NA	NA	NA	GO:0008150;GO:0009888;GO:0010073;GO:0010075;GO:0032501;GO:0032502;GO:0040008;GO:0048507;GO:0048509;GO:0048638;GO:0048856;GO:0050789;GO:0050793;GO:0065007;GO:0040007;GO:0035266;GO:0048589;	NA	Protein FANTASTIC FOUR	protein FANTASTIC FOUR 4
Cla97C05G087120	1473	40.1433	11.9639	-1.74101	4.77e-05	0.000237258	Down	K03444 ERD6, ESL1; MFS transporter, SP family, ERD6-like sugar transporter	NA	GO:0003674;GO:0005215;GO:0005351;GO:0005355;GO:0005402;GO:0008324;GO:0015075;GO:0015077;GO:0015078;GO:0015144;GO:0015145;GO:0015149;GO:0015291;GO:0015293;GO:0015294;GO:0015295;GO:0015318;GO:0022804;GO:0022857;GO:0022890;GO:0051119;	GO:0006810;GO:0006811;GO:0006812;GO:0008150;GO:0008643;GO:0008645;GO:0015672;GO:0015749;GO:0034219;GO:0034220;GO:0046323;GO:0051179;GO:0051234;GO:0055085;GO:0071702;GO:0098655;GO:0098660;GO:0098662;GO:1902600;GO:1904659;	NA	Belongs to the major facilitator superfamily. Sugar transporter (TC 2.A.1.1) family	sugar transporter ERD6-like 16
Cla97C05G087270	525	48.08	13.543	-1.84909	2.92e-05	0.000152811	Down	NA	NA	GO:0003674;GO:0005488;GO:0048037;GO:0051536;GO:0051540;	NA	NA	Belongs to the Casparian strip membrane proteins (CASP) family	CASP-like protein
Cla97C05G088340	852	35.9723	6.34933	-2.44578	1.5e-05	8.37e-05	Down	K12854 SNRNP200, BRR2; pre-mRNA-splicing helicase BRR2 [EC:3.6.4.13]	ko03040:Spliceosome	GO:0003674;GO:0003724;GO:0003824;GO:0004004;GO:0004386;GO:0005488;GO:0005515;GO:0008026;GO:0008186;GO:0016462;GO:0016787;GO:0016817;GO:0016818;GO:0016887;GO:0017111;GO:0042623;GO:0042802;GO:0070035;GO:0140098;	GO:0000245;GO:0000354;GO:0000375;GO:0000377;GO:0000398;GO:0006139;GO:0006396;GO:0006397;GO:0006725;GO:0006807;GO:0008150;GO:0008152;GO:0008380;GO:0009987;GO:0010467;GO:0016043;GO:0016070;GO:0016071;GO:0022607;GO:0022613;GO:0022618;GO:0034622;GO:0034641;GO:0043170;GO:0043933;GO:0044085;GO:0044237;GO:0044238;GO:0045292;GO:0046483;GO:0065003;GO:0071704;GO:0071826;GO:0071840;GO:0090304;GO:1901360;	GO:0005575;GO:0005622;GO:0005623;GO:0005634;GO:0005654;GO:0005681;GO:0005682;GO:0005911;GO:0009506;GO:0030054;GO:0030532;GO:0031974;GO:0031981;GO:0032991;GO:0043226;GO:0043227;GO:0043229;GO:0043231;GO:0043233;GO:0044422;GO:0044424;GO:0044428;GO:0044446;GO:0044464;GO:0046540;GO:0055044;GO:0070013;GO:0071013;GO:0097525;GO:0097526;GO:0120114;GO:1902494;GO:1990904;	U5 small nuclear ribonucleoprotein 200 kDa	DExH-box ATP-dependent RNA helicase DExH12-like
Cla97C05G089130	1773	539.832	215.4	-1.31991	1.15e-21	4.56e-20	Down	NA	NA	GO:0003674;GO:0003824;GO:0016491;GO:0016722;	GO:0008150;GO:0008152;GO:0055114;	GO:0005575;GO:0005623;GO:0005886;GO:0005911;GO:0009506;GO:0016020;GO:0030054;GO:0031224;GO:0031225;GO:0031226;GO:0044425;GO:0044459;GO:0044464;GO:0046658;GO:0055044;GO:0071944;	Monocopper oxidase-like protein	monocopper oxidase-like protein SKS1
Cla97C05G089350	252	49.7811	16.862	-1.55194	3.31e-05	0.00017137	Down	NA	NA	NA	NA	NA	NA	Unknown protein
Cla97C05G089660	1770	38.448	18.6893	-1.0387	0.0073011	0.0207207	Down	NA	NA	GO:0003674;GO:0003676;GO:0003723;GO:0003824;GO:0004518;GO:0004519;GO:0005488;GO:0016787;GO:0016788;GO:0097159;GO:1901363;	GO:0006139;GO:0006725;GO:0006807;GO:0008150;GO:0008152;GO:0009451;GO:0009987;GO:0016070;GO:0034641;GO:0043170;GO:0043412;GO:0044237;GO:0044238;GO:0046483;GO:0071704;GO:0090304;GO:0090305;GO:1901360;	GO:0005575;GO:0005622;GO:0005623;GO:0043226;GO:0043227;GO:0043229;GO:0043231;GO:0044424;GO:0044464;	Pentatricopeptide repeat-containing protein	Pentatricopeptide repeat-containing protein
Cla97C05G089820	174	16.0526	4.25372	-1.88016	0.00723096	0.020541	Down	NA	NA	NA	NA	NA	NA	Unknown protein
Cla97C05G090130	609	104.06	45.5372	-1.20368	5.58e-06	3.38e-05	Down	NA	NA	NA	NA	NA	PAR1 protein	PAR1 protein
Cla97C05G090160	1521	10.9085	2.81239	-1.97582	0.0173511	0.0434422	Down	NA	NA	GO:0003674;GO:0003824;GO:0004497;GO:0008395;GO:0016491;	GO:0006629;GO:0008150;GO:0008152;GO:0008202;GO:0009719;GO:0009725;GO:0009741;GO:0010033;GO:0010268;GO:0010817;GO:0014070;GO:0016128;GO:0016131;GO:0033993;GO:0042221;GO:0042445;GO:0042592;GO:0044238;GO:0048878;GO:0050896;GO:0055088;GO:0055114;GO:0065007;GO:0065008;GO:0071704;GO:1901360;GO:1901615;GO:1901700;	NA	Belongs to the cytochrome P450 family	Cytochrome P450
Cla97C05G090260	243	15.6446	3.07048	-2.34699	0.0028729	0.00921951	Down	NA	NA	NA	NA	NA	NA	Unknown protein
Cla97C05G090330	1119	96.0389	45.9414	-1.05973	1.98e-05	0.000108051	Down	NA	NA	NA	NA	NA	F-box kelch-repeat protein	F-box domain-containing protein
Cla97C05G090920	1125	52.5589	24.5121	-1.10508	0.000830208	0.00307305	Down	K20558 SPCH; transcription factor SPEECHLESS	ko04016:MAPK signaling pathway - plant	GO:0003674;GO:0003700;GO:0140110;	GO:0006355;GO:0007275;GO:0008150;GO:0009791;GO:0009888;GO:0009889;GO:0010374;GO:0010468;GO:0010556;GO:0019219;GO:0019222;GO:0031323;GO:0031326;GO:0032501;GO:0032502;GO:0048856;GO:0050789;GO:0050794;GO:0051171;GO:0051252;GO:0060255;GO:0065007;GO:0080090;GO:0090558;GO:1903506;GO:2000112;GO:2001141;GO:0008152;GO:0006139;GO:0006351;GO:0006725;GO:0006807;GO:0009058;GO:0009059;GO:0009987;GO:0010467;GO:…	GO:0005575;GO:0005622;GO:0005623;GO:0005634;GO:0043226;GO:0043227;GO:0043229;GO:0043231;GO:0044424;GO:0044464;	Transcription factor	transcription factor SPEECHLESS
Cla97C05G091050	1176	30.7951	6.19385	-2.27221	3e-05	0.000156845	Down	K05391 CNGC; cyclic nucleotide gated channel, plant	ko04626:Plant-pathogen interaction	NA	NA	NA	Cyclic nucleotide-gated ion channel 1-like	cyclic nucleotide-gated ion channel 1-like
Cla97C05G091120	243	3.83958	0	-4.33701	0.0142614	0.0367521	Down	NA	NA	NA	NA	NA	NA	Unknown protein
Cla97C05G092170	375	1071.22	367.936	-1.54574	9.99e-72	2.43e-69	Down	NA	NA	NA	GO:0000003;GO:0003006;GO:0007275;GO:0008150;GO:0009791;GO:0009856;GO:0009908;GO:0022414;GO:0032501;GO:0032502;GO:0044706;GO:0048367;GO:0048437;GO:0048438;GO:0048443;GO:0048466;GO:0048608;GO:0048653;GO:0048731;GO:0048827;GO:0048856;GO:0051704;GO:0061458;GO:0090567;GO:0099402;	GO:0005575;GO:0005576;GO:0005623;GO:0005886;GO:0016020;GO:0031012;GO:0031224;GO:0031225;GO:0031226;GO:0044421;GO:0044425;GO:0044459;GO:0044464;GO:0046658;GO:0048046;GO:0071944;	Basic blue	basic blue protein-like
Cla97C05G092280	222	59.2634	25.7227	-1.19833	0.000231514	0.000983386	Down	NA	NA	NA	NA	NA	NA	Unknown protein
Cla97C05G092520	231	27.0191	6.63996	-1.99875	0.000276909	0.00115536	Down	NA	NA	NA	NA	NA	NA	Unknown protein
Cla97C05G092790	1797	602.68	277.925	-1.11273	7.97e-27	4.35e-25	Down	K14487 GH3; auxin responsive GH3 gene family	ko04075:Plant hormone signal transduction	NA	GO:0008150;GO:0009314;GO:0009416;GO:0009628;GO:0009719;GO:0009725;GO:0009733;GO:0010033;GO:0042221;GO:0050896;	NA	Indole-3-acetic acid-amido synthetase	Auxin-responsive GH3 family protein
Cla97C05G092880	456	26.5852	8.18648	-1.6963	0.00196199	0.00658772	Down	NA	NA	GO:0003674;GO:0005488;GO:0005515;GO:0042802;	GO:0000003;GO:0003006;GO:0007275;GO:0008150;GO:0009553;GO:0009555;GO:0009790;GO:0009791;GO:0009793;GO:0010154;GO:0022414;GO:0032501;GO:0032502;GO:0048229;GO:0048316;GO:0048608;GO:0048731;GO:0048856;GO:0061458;	GO:0005575;GO:0005623;GO:0005886;GO:0005887;GO:0016020;GO:0016021;GO:0031224;GO:0031226;GO:0044425;GO:0044459;GO:0044464;GO:0071944;	Protein GAMETE EXPRESSED	protein GAMETE EXPRESSED 1
Cla97C05G093760	549	197.063	97.725	-1.00699	4.66e-07	3.47e-06	Down	NA	NA	NA	NA	NA	NA	Unknown protein
Cla97C05G093780	1560	5.57313	0	-4.86815	0.00245744	0.00802622	Down	K10717 CYP735A; cytokinin trans-hydroxylase	ko00908:Zeatin biosynthesis	GO:0003674;GO:0003824;GO:0004497;GO:0016491;	GO:0006725;GO:0006807;GO:0008150;GO:0008152;GO:0009058;GO:0009308;GO:0009690;GO:0009691;GO:0009987;GO:0010817;GO:0018130;GO:0019438;GO:0033397;GO:0033398;GO:0033400;GO:0033466;GO:0034641;GO:0034754;GO:0042445;GO:0042446;GO:0044237;GO:0044249;GO:0044271;GO:0046483;GO:0055114;GO:0065007;GO:0065008;GO:0071704;GO:0072521;GO:0072522;GO:1901360;GO:1901362;GO:1901564;GO:1901566;GO:1901576;	GO:0005575;GO:0005911;GO:0009506;GO:0030054;GO:0055044;	Cytokinin hydroxylase-like	Cytochrome P450, putative
Cla97C05G094150	1994	153.078	73.5138	-1.04868	2.71e-05	0.000143013	Down	K15436 TRPO3, MTR10; transportin-3	ko03013:Nucleocytoplasmic transport|ko03250:Viral life cycle - HIV-1	GO:0003674;GO:0005048;GO:0005215;GO:0005488;GO:0005515;GO:0008139;GO:0008565;GO:0033218;GO:0038023;GO:0042277;GO:0042802;GO:0060089;	GO:0006606;GO:0006810;GO:0006886;GO:0006913;GO:0007154;GO:0007165;GO:0008104;GO:0008150;GO:0009987;GO:0015031;GO:0015833;GO:0017038;GO:0023052;GO:0033036;GO:0033365;GO:0034504;GO:0034613;GO:0042886;GO:0045184;GO:0046907;GO:0050789;GO:0050794;GO:0050896;GO:0051169;GO:0051170;GO:0051179;GO:0051234;GO:0051641;GO:0051649;GO:0051716;GO:0065007;GO:0070727;GO:0071702;GO:0071705;GO:0072594;	GO:0005575;GO:0005622;GO:0005623;GO:0005634;GO:0005635;GO:0005737;GO:0012505;GO:0016020;GO:0031090;GO:0031965;GO:0031967;GO:0031975;GO:0043226;GO:0043227;GO:0043229;GO:0043231;GO:0044422;GO:0044424;GO:0044428;GO:0044446;GO:0044464;	Exportin 1-like protein	transportin-3 isoform X1
Cla97C05G094310	1533	560.111	242.045	-1.21006	4.29e-30	2.84e-28	Down	NA	NA	NA	NA	NA	Protein of unknown function (DUF3754)	Protein of unknown function (DUF3754)
Cla97C05G094980	365	25.9323	5.79045	-2.1169	0.000548382	0.00213119	Down	NA	NA	NA	NA	NA	NA	Unknown protein
Cla97C05G095340	237	33.1093	10.9564	-1.58023	0.00127948	0.00452187	Down	NA	NA	NA	NA	NA	NA	Unknown protein
Cla97C05G095410	1161	2405.06	1087.77	-1.14442	7.75e-83	2.12e-80	Down	K18696 GDE1; glycerophosphodiester phosphodiesterase [EC:3.1.4.46]	ko00564:Glycerophospholipid metabolism	GO:0000287;GO:0003674;GO:0003824;GO:0005488;GO:0008081;GO:0008889;GO:0016787;GO:0016788;GO:0042578;GO:0043167;GO:0043169;GO:0046872;GO:0047389;	GO:0006629;GO:0006644;GO:0006650;GO:0006793;GO:0006796;GO:0006873;GO:0008150;GO:0008152;GO:0009056;GO:0009395;GO:0009987;GO:0016042;GO:0019637;GO:0019725;GO:0030002;GO:0030320;GO:0030643;GO:0042592;GO:0044237;GO:0044238;GO:0044242;GO:0044248;GO:0044255;GO:0046434;GO:0046475;GO:0046486;GO:0046503;GO:0048878;GO:0050801;GO:0055062;GO:0055081;GO:0055082;GO:0055083;GO:0065007;GO:0065008;GO:0071704;GO:…	GO:0005575;GO:0005622;GO:0005623;GO:0005737;GO:0009536;GO:0043226;GO:0043227;GO:0043229;GO:0043231;GO:0044424;GO:0044444;GO:0044464;	Glycerophosphodiester phosphodiesterase	Glycerophosphodiester phosphodiesterase
Cla97C05G097180	246	41.0825	15.0975	-1.41641	0.00145668	0.00506672	Down	NA	NA	NA	NA	NA	NA	Unknown protein
Cla97C05G098070	771	176.02	52.7247	-1.74255	5.07e-14	9.98e-13	Down	NA	NA	NA	NA	NA	SPX domain-containing protein	SPX domain-containing protein
Cla97C05G098450	546	47.4339	12.6484	-1.89119	1.98e-05	0.000108051	Down	NA	NA	NA	NA	NA	NA	Unknown protein
Cla97C05G099800	287	38.2105	13.6007	-1.47453	0.00246265	0.00804195	Down	NA	NA	NA	NA	NA	NA	Unknown protein
Cla97C05G100160	1122	811.037	388.242	-1.06555	1.86e-29	1.19e-27	Down	K08241 E2.1.1.141; jasmonate O-methyltransferase [EC:2.1.1.141]	ko00592:alpha-Linolenic acid metabolism	GO:0003674;GO:0003824;GO:0008168;GO:0008757;GO:0016740;GO:0016741;GO:0030795;	GO:0006082;GO:0006950;GO:0008150;GO:0008152;GO:0009611;GO:0009694;GO:0009987;GO:0010817;GO:0019752;GO:0032259;GO:0032787;GO:0042445;GO:0043436;GO:0044237;GO:0044281;GO:0050896;GO:0065007;GO:0065008;GO:0071704;	GO:0005575;GO:0005622;GO:0005623;GO:0005737;GO:0044424;GO:0044464;	Jasmonate	jasmonate O-methyltransferase
Cla97C05G100470	267	37.9971	11.4853	-1.69723	0.000184339	0.000802372	Down	NA	NA	NA	NA	NA	NA	Unknown protein
Cla97C05G100940	300	11.4551	2.1056	-2.34541	0.0154495	0.0393628	Down	NA	NA	NA	NA	NA	NA	Unknown protein
Cla97C05G101210	351	39.2322	18.7494	-1.04982	0.00778453	0.0218619	Down	NA	NA	NA	NA	NA	NA	Unknown protein
Cla97C05G101490	1266	253.502	102.247	-1.31114	1.44e-16	3.64e-15	Down	K01176 AMY, amyA, malS; alpha-amylase [EC:3.2.1.1]	ko00500:Starch and sucrose metabolism	GO:0003674;GO:0003824;GO:0004553;GO:0004556;GO:0016160;GO:0016787;GO:0016798;	GO:0001101;GO:0008150;GO:0009719;GO:0009725;GO:0009737;GO:0009739;GO:0010033;GO:0033993;GO:0042221;GO:0050896;GO:0097305;GO:1901700;	GO:0005575;GO:0005576;GO:0048046;	Belongs to the glycosyl hydrolase 13 family	Alpha-amylase
Cla97C05G101500	717	124.831	52.7546	-1.24451	6.09e-07	4.44e-06	Down	K01176 AMY, amyA, malS; alpha-amylase [EC:3.2.1.1]	ko00500:Starch and sucrose metabolism	GO:0003674;GO:0003824;GO:0004553;GO:0004556;GO:0016160;GO:0016787;GO:0016798;	GO:0001101;GO:0008150;GO:0009719;GO:0009725;GO:0009737;GO:0009739;GO:0010033;GO:0033993;GO:0042221;GO:0050896;GO:0097305;GO:1901700;	GO:0005575;GO:0005576;GO:0048046;	Belongs to the glycosyl hydrolase 13 family	Alpha-amylase
Cla97C05G101520	1413	116.088	38.6739	-1.59581	3.42e-10	4.16e-09	Down	K09843 CYP707A; (+)-abscisic acid 8'-hydroxylase [EC:1.14.14.137]	ko00906:Carotenoid biosynthesis	GO:0003674;GO:0003824;GO:0004497;GO:0010295;GO:0016491;GO:0016705;GO:0016709;	GO:0006629;GO:0006694;GO:0007275;GO:0008150;GO:0008152;GO:0008202;GO:0008610;GO:0009058;GO:0010268;GO:0010817;GO:0016125;GO:0016128;GO:0016129;GO:0016131;GO:0016132;GO:0032501;GO:0032502;GO:0042445;GO:0042446;GO:0042592;GO:0044238;GO:0048856;GO:0048878;GO:0055088;GO:0055114;GO:0065007;GO:0065008;GO:0071704;GO:1901360;GO:1901362;GO:1901576;GO:1901615;GO:1901617;	NA	Belongs to the cytochrome P450 family	abscisic acid 8'-hydroxylase 4-like
Cla97C05G101790	1419	56.859	26.5349	-1.10209	0.000482723	0.00190343	Down	NA	NA	NA	NA	NA	NA	B30.2/SPRY domain-containing protein
Cla97C05G102350	288	27.4015	11.227	-1.28463	0.00641052	0.0184801	Down	NA	NA	NA	NA	NA	NA	Unknown protein
Cla97C05G102420	1392	200.934	74.0526	-1.44198	4.29e-13	7.62e-12	Down	K16296 SCPL-I; serine carboxypeptidase-like clade I [EC:3.4.16.-]	NA	GO:0003674;GO:0003824;GO:0016740;GO:0016746;GO:0016747;GO:0016752;	GO:0008150;GO:0008152;GO:0019748;	NA	Belongs to the peptidase S10 family	serine carboxypeptidase-like 13
Cla97C05G102910	1119	50.2466	22.8175	-1.13536	0.000841506	0.00310918	Down	K01373 CTSF; cathepsin F [EC:3.4.22.41]	ko04626:Plant-pathogen interaction	GO:0003674;GO:0003824;GO:0004175;GO:0004197;GO:0008233;GO:0008234;GO:0016787;GO:0070011;GO:0140096;	GO:0006508;GO:0006807;GO:0008150;GO:0008152;GO:0009056;GO:0009057;GO:0009987;GO:0019538;GO:0030163;GO:0043170;GO:0044237;GO:0044238;GO:0044248;GO:0044257;GO:0044260;GO:0044265;GO:0044267;GO:0051603;GO:0071704;GO:1901564;GO:1901565;GO:1901575;	GO:0000323;GO:0005575;GO:0005576;GO:0005615;GO:0005622;GO:0005623;GO:0005737;GO:0005764;GO:0005773;GO:0043226;GO:0043227;GO:0043229;GO:0043231;GO:0044421;GO:0044424;GO:0044444;GO:0044464;	Belongs to the peptidase C1 family	Cysteine Protease
Cla97C05G103590	360	46.4292	21.1708	-1.14088	0.00180336	0.00611289	Down	NA	NA	NA	NA	NA	Nuclear transport factor 2 (NTF2) family protein	Nuclear transport factor 2 family protein
Cla97C05G104280	516	200.843	70.0969	-1.52458	2.95e-16	7.21e-15	Down	K14484 IAA; auxin-responsive protein IAA	ko04075:Plant hormone signal transduction	GO:0003674;GO:0003700;GO:0140110;	GO:0000003;GO:0003006;GO:0006355;GO:0007275;GO:0008150;GO:0009555;GO:0009719;GO:0009725;GO:0009733;GO:0009790;GO:0009791;GO:0009793;GO:0009889;GO:0010033;GO:0010154;GO:0010468;GO:0010556;GO:0019219;GO:0019222;GO:0022414;GO:0031323;GO:0031326;GO:0032501;GO:0032502;GO:0042221;GO:0048229;GO:0048316;GO:0048608;GO:0048731;GO:0048856;GO:0050789;GO:0050794;GO:0050896;GO:0051171;GO:0051252;GO:0060255;GO:…	NA	Aux IAA proteins are short-lived transcriptional factors that function as repressors of early auxin response genes at low auxin concentrations	Auxin-responsive protein
Cla97C05G104970	501	97.3432	41.9134	-1.20238	1e-05	5.78e-05	Down	NA	NA	NA	NA	GO:0005575;GO:0005622;GO:0005623;GO:0005737;GO:0009507;GO:0009532;GO:0009536;GO:0009570;GO:0010287;GO:0043226;GO:0043227;GO:0043229;GO:0043231;GO:0044422;GO:0044424;GO:0044434;GO:0044435;GO:0044444;GO:0044446;GO:0044464;	protein At1g26090, chloroplastic	ArsA_ATPase domain-containing protein
Cla97C05G105160	531	7.67917	0.674256	-3.49258	0.00956471	0.0261043	Down	K01530 E7.6.2.1; phospholipid-translocating ATPase [EC:7.6.2.1]	NA	NA	NA	NA	NA	Phospholipid-transporting ATPase
Cla97C05G105320	603	62.0775	26.8956	-1.21138	0.000117266	0.000536255	Down	NA	NA	NA	NA	GO:0005575;GO:0005622;GO:0005623;GO:0005634;GO:0043226;GO:0043227;GO:0043229;GO:0043231;GO:0044424;GO:0044464;	basic region leucin zipper	basic leucine zipper 43
Cla97C05G106060	918	31.5709	6.36191	-2.29658	3.12e-05	0.000162172	Down	NA	NA	NA	NA	GO:0005575;GO:0005622;GO:0005623;GO:0005737;GO:0005794;GO:0005802;GO:0005886;GO:0012505;GO:0016020;GO:0031984;GO:0043226;GO:0043227;GO:0043229;GO:0043231;GO:0044422;GO:0044424;GO:0044431;GO:0044444;GO:0044446;GO:0044464;GO:0071944;GO:0098791;	phosphate transporter PHO1 homolog	phosphate transporter PHO1 homolog 10
Cla97C05G106120	852	139.716	67.7134	-1.05157	3.88e-07	2.94e-06	Down	NA	NA	GO:0003674;GO:0003700;GO:0140110;	GO:0000003;GO:0003006;GO:0006355;GO:0007275;GO:0007568;GO:0008150;GO:0009790;GO:0009791;GO:0009793;GO:0009825;GO:0009835;GO:0009889;GO:0009908;GO:0009987;GO:0010150;GO:0010154;GO:0010468;GO:0010556;GO:0016049;GO:0019219;GO:0019222;GO:0021700;GO:0022414;GO:0031323;GO:0031326;GO:0032501;GO:0032502;GO:0040007;GO:0048316;GO:0048366;GO:0048367;GO:0048608;GO:0048731;GO:0048827;GO:0048856;GO:0050789;GO:…	GO:0005575;GO:0005622;GO:0005623;GO:0005634;GO:0043226;GO:0043227;GO:0043229;GO:0043231;GO:0044424;GO:0044464;	NAC transcription factor	NAC domain-containing protein
Cla97C05G106810	396	126.588	62.725	-1.00899	3.61e-06	2.26e-05	Down	K03671 trxA; thioredoxin 1	NA	NA	NA	NA	Belongs to the thioredoxin family	Thioredoxin h
Cla97C05G106920	1926	1570.69	738.71	-1.08954	8.61e-45	9.95e-43	Down	NA	NA	GO:0003674;GO:0003824;GO:0004672;GO:0004674;GO:0004675;GO:0004888;GO:0016301;GO:0016740;GO:0016772;GO:0016773;GO:0019199;GO:0038023;GO:0060089;GO:0140096;	GO:0006464;GO:0006468;GO:0006793;GO:0006796;GO:0006807;GO:0006810;GO:0006897;GO:0006898;GO:0006950;GO:0006952;GO:0007154;GO:0007165;GO:0007166;GO:0007167;GO:0007178;GO:0008150;GO:0008152;GO:0009595;GO:0009605;GO:0009607;GO:0009617;GO:0009987;GO:0010359;GO:0016043;GO:0016045;GO:0016192;GO:0016310;GO:0019538;GO:0022898;GO:0023052;GO:0032409;GO:0032412;GO:0032879;GO:0033036;GO:0033037;GO:0033554;GO:…	GO:0005575;GO:0005622;GO:0005623;GO:0005737;GO:0005768;GO:0005886;GO:0012505;GO:0016020;GO:0031410;GO:0031982;GO:0043226;GO:0043227;GO:0043229;GO:0044424;GO:0044444;GO:0044464;GO:0071944;GO:0097708;	LRR receptor-like serine threonine-protein kinase	Leucine-rich repeat receptor protein kinase family protein
Cla97C05G107400	930	43.5705	20.0205	-1.12868	0.00329556	0.01038	Down	K08235 E2.4.1.207; xyloglucan:xyloglucosyl transferase [EC:2.4.1.207]	NA	NA	GO:0008150;GO:0009664;GO:0009825;GO:0009827;GO:0009831;GO:0009987;GO:0016043;GO:0016049;GO:0040007;GO:0042545;GO:0042547;GO:0045229;GO:0071554;GO:0071555;GO:0071669;GO:0071840;	GO:0005575;GO:0005623;GO:0005886;GO:0005887;GO:0016020;GO:0016021;GO:0031224;GO:0031226;GO:0044425;GO:0044459;GO:0044464;GO:0071944;	Catalyzes xyloglucan endohydrolysis (XEH) and or endotransglycosylation (XET). Cleaves and religates xyloglucan polymers, an essential constituent of the primary cell wall, and thereby participates in cell wall construction of growing tissues	Xyloglucan endotransglucosylase/hydrolase
Cla97C05G107770	624	165.047	50.2901	-1.71818	1.74e-16	4.38e-15	Down	NA	NA	NA	NA	NA	SOUL heme-binding protein	Heme-binding protein 2-like
Cla97C05G107960	2175	59.8721	26.2287	-1.18769	0.000442576	0.00176091	Down	K20892 RAY1; beta-arabinofuranosyltransferase [EC:2.4.2.-]	NA	GO:0003674;GO:0003824;GO:0008194;GO:0008378;GO:0016740;GO:0016757;GO:0016758;GO:0035250;	GO:0006464;GO:0006486;GO:0006807;GO:0008150;GO:0008152;GO:0009058;GO:0009059;GO:0009100;GO:0009101;GO:0009987;GO:0019538;GO:0034645;GO:0036211;GO:0042546;GO:0043170;GO:0043412;GO:0043413;GO:0044085;GO:0044237;GO:0044238;GO:0044249;GO:0044260;GO:0044267;GO:0070085;GO:0071554;GO:0071704;GO:0071840;GO:1901135;GO:1901137;GO:1901564;GO:1901566;GO:1901576;	GO:0005575;GO:0005622;GO:0005623;GO:0005737;GO:0005794;GO:0012505;GO:0043226;GO:0043227;GO:0043229;GO:0043231;GO:0044424;GO:0044444;GO:0044464;	Nucleotide-diphospho-sugar transferase	Nucleotide-diphospho-sugar transferase
Cla97C05G108170	1533	39.4975	6.68248	-2.58592	2.35e-07	1.84e-06	Down	NA	NA	GO:0003674;GO:0003824;GO:0004497;GO:0016491;GO:0016705;GO:0016709;	GO:0006950;GO:0008150;GO:0008152;GO:0009058;GO:0009266;GO:0009408;GO:0009628;GO:0010286;GO:0019748;GO:0044550;GO:0050896;GO:0055114;	GO:0005575;GO:0016020;	Cytochrome p450	cytochrome P450 71B34-like
Cla97C05G108190	678	34.2153	0	-7.4904	2.86e-09	3.08e-08	Down	NA	NA	GO:0003674;GO:0003824;GO:0004497;GO:0016491;GO:0016705;GO:0016709;	GO:0006950;GO:0008150;GO:0008152;GO:0009058;GO:0009266;GO:0009408;GO:0009628;GO:0010286;GO:0019748;GO:0044550;GO:0050896;GO:0055114;	GO:0005575;GO:0016020;	Cytochrome p450	cytochrome P450 71B19-like
Cla97C05G108240	1263	256.063	112.168	-1.19085	1.34e-14	2.85e-13	Down	NA	NA	GO:0003674;GO:0003824;GO:0004497;GO:0016491;GO:0016705;GO:0016709;	GO:0006950;GO:0008150;GO:0008152;GO:0009058;GO:0009266;GO:0009408;GO:0009628;GO:0010286;GO:0019748;GO:0044550;GO:0050896;GO:0055114;	GO:0005575;GO:0016020;	Cytochrome p450	cytochrome P450 71B37-like
Cla97C05G108920	396	156.568	69.2729	-1.17839	2.18e-08	2.05e-07	Down	NA	NA	NA	NA	NA	NA	Annexin
Cla97C06G109460	264	14.7795	2.68704	-2.4407	0.00177688	0.00603708	Down	NA	NA	NA	NA	NA	NA	Unknown protein
Cla97C06G109660	2019	80.2602	36.5892	-1.1189	8.63e-05	0.000405555	Down	K15292 STXBP1, MUNC18-1; syntaxin-binding protein 1	NA	NA	NA	NA	Belongs to the STXBP unc-18 SEC1 family	protein transport Sec1a-like
Cla97C06G110330	1890	109.051	50.9221	-1.09133	4.4e-06	2.72e-05	Down	NA	NA	NA	NA	NA	Agglutinin domain	Natterin-3 like
Cla97C06G110620	312	11.8365	1.63933	-2.80928	0.00255376	0.00830852	Down	NA	NA	NA	NA	NA	NA	Protein DETOXIFICATION 27-like
Cla97C06G110880	2118	4.79916	0	-4.65911	0.0049553	0.0147884	Down	K15812 CPQ; cucurbitadienol synthase [EC:5.4.99.33]	ko00909:Sesquiterpenoid and triterpenoid biosynthesis|ko00996:Biosynthesis of various alkaloids	GO:0003674;GO:0003824;GO:0016853;GO:0016866;GO:0016871;GO:0031559;	GO:0006629;GO:0006720;GO:0006721;GO:0006722;GO:0008150;GO:0008152;GO:0008299;GO:0008610;GO:0009058;GO:0009987;GO:0010685;GO:0010686;GO:0016104;GO:0016114;GO:0044237;GO:0044238;GO:0044249;GO:0044255;GO:0071704;GO:1901360;GO:1901362;GO:1901576;	NA	Belongs to the terpene cyclase mutase family	Terpene cyclase/mutase family member
Cla97C06G111090	1011	113.426	56.5111	-1.00371	6.94e-06	4.13e-05	Down	NA	NA	NA	NA	NA	histone H2A-K119 monoubiquitination	protein LAX PANICLE 2-like
Cla97C06G111380	1158	166.339	71.0751	-1.224	3.27e-10	3.98e-09	Down	NA	NA	NA	GO:0008150;GO:0010817;GO:0032879;GO:0050789;GO:0051049;GO:0065007;GO:0065008;GO:2000012;GO:0051179;GO:0006810;GO:0051234;GO:0009914;GO:0009926;GO:0060918;	GO:0005575;GO:0005622;GO:0005623;GO:0005634;GO:0005886;GO:0016020;GO:0043226;GO:0043227;GO:0043229;GO:0043231;GO:0044424;GO:0044464;GO:0071944;	regulation of auxin polar transport	protein LAZY 1-like
Cla97C06G111600	528	324.643	137.304	-1.24288	6.86e-18	1.96e-16	Down	NA	NA	GO:0003674;GO:0003676;GO:0003677;GO:0005488;GO:0005515;GO:0019904;GO:0097159;GO:1901363;	GO:0001101;GO:0006091;GO:0008150;GO:0008152;GO:0009719;GO:0009725;GO:0009737;GO:0009767;GO:0009773;GO:0009987;GO:0010033;GO:0015979;GO:0019684;GO:0022900;GO:0033993;GO:0042221;GO:0044237;GO:0050896;GO:0055114;GO:0097305;GO:1901700;	GO:0000229;GO:0005575;GO:0005622;GO:0005623;GO:0005694;GO:0005737;GO:0009295;GO:0009507;GO:0009508;GO:0009521;GO:0009522;GO:0009526;GO:0009532;GO:0009534;GO:0009535;GO:0009536;GO:0009579;GO:0009941;GO:0016020;GO:0030093;GO:0031967;GO:0031975;GO:0031976;GO:0031984;GO:0032991;GO:0034357;GO:0042646;GO:0042651;GO:0043226;GO:0043227;GO:0043228;GO:0043229;GO:0043231;GO:0043232;GO:0044422;GO:0044424;GO:…	Thylakoid membrane phosphoprotein 14 kDa	protein CURVATURE THYLAKOID 1B, chloroplastic
Cla97C06G112560	1404	728.872	195.727	-1.89737	2.69e-68	6.06e-66	Down	NA	NA	NA	NA	NA	Belongs to the UDP-glycosyltransferase family	Glycosyltransferase
Cla97C06G112730	303	35.9661	11.5376	-1.65639	0.00033036	0.00135646	Down	NA	NA	NA	NA	NA	NA	Unknown protein
Cla97C06G112900	2160	12.1284	2.4064	-2.23851	0.0165267	0.0417084	Down	NA	NA	GO:0003674;GO:0005198;GO:0005199;	GO:0000003;GO:0000902;GO:0000904;GO:0003006;GO:0008150;GO:0009653;GO:0009826;GO:0009856;GO:0009860;GO:0009932;GO:0009987;GO:0016043;GO:0016049;GO:0022414;GO:0030154;GO:0032501;GO:0032502;GO:0032989;GO:0040007;GO:0044706;GO:0048468;GO:0048588;GO:0048589;GO:0048856;GO:0048868;GO:0048869;GO:0051704;GO:0060560;GO:0071840;	NA	Pollen-specific leucine-rich repeat extensin-like protein	Pollen-specific leucine-rich repeat extensin-like protein 3
Cla97C06G112960	1932	10.3513	2.23095	-2.15182	0.0189117	0.0467424	Down	NA	NA	GO:0003674;GO:0005198;GO:0005199;	GO:0000003;GO:0000902;GO:0000904;GO:0003006;GO:0008150;GO:0009653;GO:0009826;GO:0009856;GO:0009860;GO:0009932;GO:0009987;GO:0016043;GO:0016049;GO:0022414;GO:0030154;GO:0032501;GO:0032502;GO:0032989;GO:0040007;GO:0044706;GO:0048468;GO:0048588;GO:0048589;GO:0048856;GO:0048868;GO:0048869;GO:0051704;GO:0060560;GO:0071840;	NA	Pollen-specific leucine-rich repeat extensin-like protein	Pollen-specific leucine-rich repeat extensin-like protein 3
Cla97C06G113050	264	14.4086	1.504	-3.13222	0.00091977	0.00337005	Down	NA	NA	NA	NA	NA	NA	Unknown protein
Cla97C06G113820	432	67.1102	31.9169	-1.05092	0.00159435	0.00548899	Down	NA	NA	NA	NA	NA	NA	Unknown protein
Cla97C06G113870	1983	91.4155	43.9933	-1.04476	0.000100781	0.000467525	Down	NA	NA	GO:0003674;GO:0003676;GO:0003723;GO:0003824;GO:0004518;GO:0004519;GO:0005488;GO:0016787;GO:0016788;GO:0097159;GO:1901363;	GO:0006139;GO:0006725;GO:0006807;GO:0008150;GO:0008152;GO:0009451;GO:0009987;GO:0016070;GO:0034641;GO:0043170;GO:0043412;GO:0044237;GO:0044238;GO:0046483;GO:0071704;GO:0090304;GO:0090305;GO:1901360;	GO:0005575;GO:0005622;GO:0005623;GO:0043226;GO:0043227;GO:0043229;GO:0043231;GO:0044424;GO:0044464;	Pentatricopeptide repeat-containing protein	Pentatricopeptide repeat-containing protein
Cla97C06G114450	1713	53.6247	11.6106	-2.18035	6.86e-08	5.91e-07	Down	K01051 E3.1.1.11; pectinesterase [EC:3.1.1.11]	ko00040:Pentose and glucuronate interconversions	GO:0003674;GO:0003824;GO:0004857;GO:0016787;GO:0016788;GO:0030234;GO:0030599;GO:0046910;GO:0052689;GO:0098772;	GO:0008150;GO:0043086;GO:0044092;GO:0050790;GO:0065007;GO:0065009;	GO:0005575;GO:0005623;GO:0044464;GO:0071944;	Acts in the modification of cell walls via demethylesterification of cell wall pectin	Pectinesterase
Cla97C06G114590	360	66.6772	21.7173	-1.60267	2.05e-06	1.35e-05	Down	NA	NA	NA	NA	NA	NA	Unknown protein
Cla97C06G115580	774	267.789	124.698	-1.11323	2.62e-10	3.24e-09	Down	K07025 K07025; putative hydrolase of the HAD superfamily	NA	NA	NA	NA	HAD-hyrolase-like	Haloacid dehalogenase-like hydrolase (HAD) superfamily protein
Cla97C06G115670	363	16.0316	4.68985	-1.75625	0.010254	0.0276684	Down	NA	NA	NA	NA	NA	NA	Unknown protein
Cla97C06G115830	516	13.8363	1.93015	-2.78894	0.001856	0.00627031	Down	NA	NA	NA	NA	NA	Belongs to the plant LTP family	Non-specific lipid-transfer protein-like protein
Cla97C06G115840	603	30.4275	10.222	-1.56603	0.00115886	0.00413238	Down	NA	NA	NA	NA	NA	Non-specific lipid-transfer protein-like protein	Non-specific lipid-transfer protein-like protein
Cla97C06G116210	2064	593.423	270.952	-1.12681	9.57e-24	4.4e-22	Down	NA	NA	NA	NA	NA	Sieve element occlusion	protein SIEVE ELEMENT OCCLUSION B-like
Cla97C06G116570	279	14502.2	6767.86	-1.09966	5.45e-167	5.02e-164	Down	NA	NA	NA	NA	NA	NA	repetitive proline-rich cell wall protein 3-like
Cla97C06G116590	231	4.78867	0	-4.65651	0.00484442	0.0145003	Down	NA	NA	NA	NA	NA	NA	Unknown protein
Cla97C06G116700	315	223.16	104.478	-1.08301	4.25e-08	3.79e-07	Down	NA	NA	NA	NA	NA	NA	Unknown protein
Cla97C06G117070	966	492.074	235.781	-1.0575	1.42e-19	4.7e-18	Down	K14484 IAA; auxin-responsive protein IAA	ko04075:Plant hormone signal transduction	GO:0003674;GO:0003700;GO:0140110;	GO:0003002;GO:0006355;GO:0007275;GO:0007389;GO:0008150;GO:0009719;GO:0009725;GO:0009733;GO:0009790;GO:0009880;GO:0009889;GO:0009890;GO:0009892;GO:0010033;GO:0010051;GO:0010468;GO:0010556;GO:0010558;GO:0010605;GO:0010629;GO:0019219;GO:0019222;GO:0022622;GO:0031323;GO:0031324;GO:0031326;GO:0031327;GO:0032501;GO:0032502;GO:0042221;GO:0045892;GO:0045934;GO:0048364;GO:0048519;GO:0048523;GO:0048731;GO:…	GO:0005575;GO:0005622;GO:0005623;GO:0005634;GO:0043226;GO:0043227;GO:0043229;GO:0043231;GO:0044424;GO:0044464;	Aux IAA proteins are short-lived transcriptional factors that function as repressors of early auxin response genes at low auxin concentrations	Auxin-responsive protein
Cla97C06G117180	1665	602.482	290.437	-1.0522	1.07e-21	4.29e-20	Down	K01177 E3.2.1.2; beta-amylase [EC:3.2.1.2]	ko00500:Starch and sucrose metabolism	GO:0003674;GO:0003824;GO:0004553;GO:0016160;GO:0016161;GO:0016787;GO:0016798;	GO:0000272;GO:0001101;GO:0005975;GO:0005976;GO:0005982;GO:0005983;GO:0006073;GO:0006950;GO:0008150;GO:0008152;GO:0009056;GO:0009057;GO:0009251;GO:0009414;GO:0009415;GO:0009628;GO:0009987;GO:0010035;GO:0016052;GO:0042221;GO:0043170;GO:0044042;GO:0044237;GO:0044238;GO:0044247;GO:0044248;GO:0044260;GO:0044262;GO:0044264;GO:0044275;GO:0050896;GO:0071704;GO:1901575;GO:1901700;	GO:0005575;GO:0005622;GO:0005623;GO:0005634;GO:0005737;GO:0005829;GO:0043226;GO:0043227;GO:0043229;GO:0043231;GO:0044424;GO:0044444;GO:0044464;	Beta-amylase	Beta-amylase
Cla97C06G117340	1701	21.8494	4.58706	-2.28048	0.000308698	0.00127511	Down	K09840 NCED; 9-cis-epoxycarotenoid dioxygenase [EC:1.13.11.51]	ko00906:Carotenoid biosynthesis	GO:0003674;GO:0003824;GO:0010436;GO:0016491;GO:0016701;GO:0016702;GO:0045549;GO:0051213;	GO:0006066;GO:0006082;GO:0006629;GO:0006714;GO:0006720;GO:0006721;GO:0008150;GO:0008152;GO:0008299;GO:0008610;GO:0009058;GO:0009314;GO:0009416;GO:0009628;GO:0009639;GO:0009687;GO:0009688;GO:0009987;GO:0010114;GO:0016053;GO:0016106;GO:0016114;GO:0019752;GO:0032787;GO:0043288;GO:0043289;GO:0043436;GO:0044237;GO:0044238;GO:0044249;GO:0044255;GO:0044281;GO:0044283;GO:0046165;GO:0046394;GO:0050896;GO:…	GO:0005575;GO:0005622;GO:0005623;GO:0005737;GO:0009507;GO:0009532;GO:0009534;GO:0009535;GO:0009536;GO:0009570;GO:0009579;GO:0016020;GO:0031976;GO:0031984;GO:0034357;GO:0042651;GO:0043226;GO:0043227;GO:0043229;GO:0043231;GO:0044422;GO:0044424;GO:0044434;GO:0044435;GO:0044436;GO:0044444;GO:0044446;GO:0044464;GO:0055035;	9-cis-epoxycarotenoid dioxygenase NCED6	9-cis-epoxycarotenoid dioxygenase NCED6, chloroplastic
Cla97C06G117380	363	24.3309	7.823	-1.63206	0.0025968	0.00843242	Down	NA	NA	NA	NA	NA	NA	Unknown protein
Cla97C06G117620	1092	15.1665	0	-6.31663	2.66e-06	1.7e-05	Down	K24544 CYP714C; cytochrome P450 family 714 subfamily C	NA	GO:0003674;GO:0003824;GO:0004497;GO:0016491;	GO:0006629;GO:0008150;GO:0008152;GO:0008202;GO:0010268;GO:0010817;GO:0016128;GO:0016131;GO:0042445;GO:0042592;GO:0044238;GO:0048878;GO:0055088;GO:0055114;GO:0065007;GO:0065008;GO:0071704;GO:1901360;GO:1901615;	NA	Cytochrome p450	cytochrome P450 714C2-like
Cla97C06G118220	909	295.913	124.709	-1.24184	5e-17	1.32e-15	Down	NA	NA	NA	NA	NA	NA	mucin-17
Cla97C06G118420	1416	14.2764	3.49663	-2.0495	0.00613987	0.017793	Down	K01369 LGMN; legumain [EC:3.4.22.34]	NA	NA	NA	NA	Vacuolar-processing enzyme-like	Vacuolar-processing enzyme
Cla97C06G118590	1029	44.7682	20.8546	-1.09909	0.00390129	0.0120277	Down	NA	NA	NA	NA	NA	Bark storage protein	Bark storage protein A
Cla97C06G119270	273	94.2109	41.3491	-1.17385	2.17e-05	0.000117183	Down	NA	NA	NA	NA	NA	NA	Unknown protein
Cla97C06G119550	2541	3592.03	1436.69	-1.32036	4.75e-86	1.35e-83	Down	NA	NA	GO:0003674;GO:0005198;GO:0005199;	NA	GO:0005575;GO:0005618;GO:0005623;GO:0005911;GO:0009505;GO:0009506;GO:0030054;GO:0030312;GO:0044464;GO:0055044;GO:0071944;	leucine-rich repeat extensin-like protein	Leucine-rich repeat extensin-like protein 4
Cla97C06G120570	309	35.6224	13.4707	-1.3944	0.00237812	0.00779232	Down	NA	NA	NA	NA	NA	NA	Unknown protein
Cla97C06G120580	729	117.239	40.8627	-1.51066	5.7e-10	6.68e-09	Down	K14484 IAA; auxin-responsive protein IAA	ko04075:Plant hormone signal transduction	GO:0003674;GO:0003700;GO:0140110;	GO:0006355;GO:0008150;GO:0009314;GO:0009416;GO:0009628;GO:0009639;GO:0009719;GO:0009725;GO:0009733;GO:0009889;GO:0010033;GO:0010114;GO:0010218;GO:0010468;GO:0010556;GO:0019219;GO:0019222;GO:0031323;GO:0031326;GO:0042221;GO:0050789;GO:0050794;GO:0050896;GO:0051171;GO:0051252;GO:0060255;GO:0065007;GO:0080090;GO:1903506;GO:2000112;GO:2001141;GO:0008152;GO:0006139;GO:0006351;GO:0006725;GO:0006807;GO:…	NA	Aux IAA proteins are short-lived transcriptional factors that function as repressors of early auxin response genes at low auxin concentrations	Auxin-responsive protein
Cla97C06G120800	366	39.5991	16.5811	-1.24903	0.00186496	0.00629534	Down	NA	NA	NA	NA	NA	NA	Unknown protein
Cla97C06G121130	453	32.1426	15.6187	-1.05196	0.0124989	0.0328499	Down	NA	NA	NA	NA	NA	NA	Unknown protein
Cla97C06G121320	2856	39.7726	10.8863	-1.86301	1.59e-05	8.84e-05	Down	K01535 PMA1, PMA2; H+-transporting ATPase [EC:7.1.2.1]	ko00190:Oxidative phosphorylation	NA	NA	GO:0005575;GO:0005623;GO:0005886;GO:0016020;GO:0044464;GO:0071944;	ATPase 8, plasma	Plasma membrane ATPase
Cla97C06G121810	2607	10.0329	1.7547	-2.53208	0.0116771	0.0309828	Down	NA	NA	NA	NA	NA	Belongs to the protein kinase superfamily. Ser Thr protein kinase family	Protein kinase domain-containing protein
Cla97C06G121890	5547	747.977	312.752	-1.25254	9.14e-26	4.78e-24	Down	K03255 TIF31, CLU1; protein TIF31	NA	NA	GO:0001101;GO:0008150;GO:0009719;GO:0009725;GO:0009737;GO:0010033;GO:0033993;GO:0042221;GO:0050896;GO:0097305;GO:1901700;	NA	Translation initiation factor eIF3 subunit 135	protein TSS
Cla97C06G121950	288	44.8223	11.415	-1.98085	2.29e-06	1.49e-05	Down	NA	NA	NA	NA	NA	NA	Unknown protein
Cla97C06G122110	1131	179.937	72.6989	-1.30442	2.56e-12	4.13e-11	Down	NA	NA	GO:0003674;GO:0005215;GO:0022857;	GO:0006810;GO:0007154;GO:0007165;GO:0008150;GO:0009719;GO:0009725;GO:0009733;GO:0009734;GO:0009755;GO:0009987;GO:0010033;GO:0023052;GO:0032870;GO:0042221;GO:0050789;GO:0050794;GO:0050896;GO:0051179;GO:0051234;GO:0051716;GO:0055085;GO:0065007;GO:0070887;GO:0071310;GO:0071365;GO:0071495;	GO:0005575;GO:0005622;GO:0005623;GO:0005737;GO:0005886;GO:0005887;GO:0005938;GO:0016020;GO:0016021;GO:0031224;GO:0031226;GO:0044424;GO:0044425;GO:0044444;GO:0044459;GO:0044464;GO:0071944;GO:0099568;	WAT1-related protein	WAT1-related protein
Cla97C06G123120	738	198.506	72.0202	-1.45931	3.94e-14	7.86e-13	Down	NA	NA	GO:0003674;GO:0003700;GO:0140110;	GO:0006355;GO:0008150;GO:0009889;GO:0010468;GO:0010556;GO:0019219;GO:0019222;GO:0031323;GO:0031326;GO:0050789;GO:0050794;GO:0051171;GO:0051252;GO:0060255;GO:0065007;GO:0080090;GO:1903506;GO:2000112;GO:2001141;GO:0008152;GO:0006139;GO:0006351;GO:0006725;GO:0006807;GO:0009058;GO:0009059;GO:0009987;GO:0010467;GO:0016070;GO:0018130;GO:0019438;GO:0032774;GO:0034641;GO:0034645;GO:0034654;GO:0043170;GO:…	NA	transcription factor	Basic helix-loop-helix transcription factor
Cla97C06G123280	1089	24.0811	8.45975	-1.54551	0.0136802	0.0354711	Down	NA	NA	NA	NA	NA	Plant intracellular ras-group-related LRR protein	Plant intracellular Ras-group-related LRR protein 6
Cla97C06G124240	810	5.35076	0	-4.82025	0.00363336	0.0112912	Down	K09422 MYBP; transcription factor MYB, plant	NA	GO:0000981;GO:0001067;GO:0001134;GO:0001135;GO:0003674;GO:0003676;GO:0003677;GO:0003700;GO:0005488;GO:0043565;GO:0044212;GO:0097159;GO:0140110;GO:1901363;GO:0005515;GO:0008134;	GO:0000003;GO:0001101;GO:0003006;GO:0006355;GO:0006357;GO:0007154;GO:0007165;GO:0007275;GO:0008150;GO:0009719;GO:0009725;GO:0009739;GO:0009740;GO:0009753;GO:0009755;GO:0009791;GO:0009867;GO:0009889;GO:0009908;GO:0009987;GO:0010033;GO:0010468;GO:0010476;GO:0010556;GO:0019219;GO:0019222;GO:0022414;GO:0023052;GO:0030154;GO:0031323;GO:0031326;GO:0032501;GO:0032502;GO:0032870;GO:0033993;GO:0042221;GO:…	GO:0005575;GO:0005622;GO:0005623;GO:0005634;GO:0043226;GO:0043227;GO:0043229;GO:0043231;GO:0044424;GO:0044464;	transcription factor	MYB transcription factor
Cla97C06G124480	270	13.916	4.22358	-1.74477	0.0154918	0.0394557	Down	NA	NA	NA	NA	NA	NA	Unknown protein
Cla97C06G124620	1608	230.834	89.3776	-1.36106	4.78e-11	6.56e-10	Down	K13123 GPATCH1; G patch domain-containing protein 1	NA	GO:0003674;GO:0003676;GO:0003723;GO:0005488;GO:0070878;GO:0070883;GO:0097159;GO:1901363;	GO:0000375;GO:0000377;GO:0000398;GO:0006139;GO:0006396;GO:0006397;GO:0006725;GO:0006807;GO:0008150;GO:0008152;GO:0008380;GO:0009888;GO:0009892;GO:0009987;GO:0010033;GO:0010087;GO:0010467;GO:0010468;GO:0010605;GO:0010608;GO:0010629;GO:0014070;GO:0016070;GO:0016071;GO:0016246;GO:0016441;GO:0016458;GO:0019222;GO:0030422;GO:0031047;GO:0031050;GO:0032502;GO:0034641;GO:0035194;GO:0035195;GO:0035196;GO:…	GO:0005575;GO:0005622;GO:0005623;GO:0005634;GO:0005681;GO:0032991;GO:0043226;GO:0043227;GO:0043229;GO:0043231;GO:0044422;GO:0044424;GO:0044428;GO:0044446;GO:0044464;GO:0071013;GO:1902494;GO:1990904;	G patch domain-containing protein	G-patch domain containing protein
Cla97C06G124670	441	56.4309	24.8906	-1.16425	0.000895187	0.0032895	Down	NA	NA	NA	NA	GO:0005575;GO:0005622;GO:0005623;GO:0005737;GO:0005777;GO:0042579;GO:0043226;GO:0043227;GO:0043229;GO:0043231;GO:0044424;GO:0044444;GO:0044464;	Acyl-activating enzyme 17	AMP-binding domain-containing protein
Cla97C06G124810	342	19.6003	7.05613	-1.45892	0.0119326	0.0315461	Down	NA	NA	NA	NA	NA	NA	Unknown protein
Cla97C06G125630	228	18.503	6.69265	-1.45204	0.0151102	0.0386295	Down	NA	NA	NA	NA	NA	NA	Unknown protein
Cla97C06G125640	1089	87.3193	29.5958	-1.54639	1.1e-07	9.17e-07	Down	NA	NA	GO:0003674;GO:0003700;GO:0140110;	GO:0006355;GO:0008150;GO:0009889;GO:0010468;GO:0010556;GO:0019219;GO:0019222;GO:0031323;GO:0031326;GO:0050789;GO:0050794;GO:0051171;GO:0051252;GO:0060255;GO:0065007;GO:0080090;GO:1903506;GO:2000112;GO:2001141;GO:0008152;GO:0006139;GO:0006351;GO:0006725;GO:0006807;GO:0009058;GO:0009059;GO:0009987;GO:0010467;GO:0016070;GO:0018130;GO:0019438;GO:0032774;GO:0034641;GO:0034645;GO:0034654;GO:0043170;GO:…	NA	NAC domain-containing protein	NAC domain-containing protein
Cla97C06G126000	198	39.0741	12.5029	-1.63462	0.00023128	0.000982805	Down	NA	NA	NA	NA	NA	NA	Unknown protein
Cla97C06G126340	735	84.4625	33.4561	-1.32138	1.11e-05	6.36e-05	Down	K10084 EDEM1; ER degradation enhancer, mannosidase alpha-like 1	ko04141:Protein processing in endoplasmic reticulum	GO:0003674;GO:0003824;GO:0004553;GO:0004559;GO:0004571;GO:0015923;GO:0015924;GO:0016787;GO:0016798;	GO:0006491;GO:0006508;GO:0006511;GO:0006807;GO:0006950;GO:0008150;GO:0008152;GO:0009056;GO:0009057;GO:0009100;GO:0009987;GO:0010033;GO:0010243;GO:0010498;GO:0019538;GO:0019941;GO:0030163;GO:0030433;GO:0033554;GO:0034976;GO:0036503;GO:0042221;GO:0043161;GO:0043170;GO:0043632;GO:0044237;GO:0044238;GO:0044248;GO:0044257;GO:0044260;GO:0044265;GO:0044267;GO:0050896;GO:0051603;GO:0051716;GO:0071704;GO:…	GO:0000139;GO:0005575;GO:0005622;GO:0005623;GO:0005737;GO:0005783;GO:0005794;GO:0012505;GO:0016020;GO:0031090;GO:0031984;GO:0043226;GO:0043227;GO:0043229;GO:0043231;GO:0044422;GO:0044424;GO:0044431;GO:0044444;GO:0044446;GO:0044464;GO:0098588;GO:0098791;	Belongs to the glycosyl hydrolase 47 family	alpha-1,2-Mannosidase
Cla97C06G126760	309	30.4668	10.4502	-1.53212	0.00172594	0.00588408	Down	NA	NA	NA	NA	NA	NA	Unknown protein
Cla97C06G126820	411	11.9477	2.9579	-1.97926	0.0180875	0.0450573	Down	NA	NA	NA	NA	NA	NA	Unknown protein
Cla97C06G126970	1650	37.2166	13.2198	-1.48484	0.000354748	0.00144498	Down	NA	NA	GO:0003674;GO:0003676;GO:0003723;GO:0003824;GO:0004518;GO:0004519;GO:0005488;GO:0016787;GO:0016788;GO:0097159;GO:1901363;	GO:0000959;GO:0006139;GO:0006725;GO:0006807;GO:0008150;GO:0008152;GO:0009451;GO:0009987;GO:0016070;GO:0034641;GO:0043170;GO:0043412;GO:0044237;GO:0044238;GO:0046483;GO:0071704;GO:0090304;GO:0090305;GO:1900864;GO:1901360;	GO:0005575;GO:0005622;GO:0005623;GO:0043226;GO:0043227;GO:0043229;GO:0043231;GO:0044424;GO:0044464;	Pentatricopeptide repeat-containing protein	Tetratricopeptide repeat-like superfamily protein
Cla97C06G128230	519	180.627	52.752	-1.75569	1.13e-11	1.68e-10	Down	NA	NA	NA	NA	NA	NA	Unknown protein
Cla97C07G128420	1308	31.2129	11.5204	-1.44874	0.0019591	0.00658018	Down	K25841 ALMT; aluminum-activated malate transporter family protein	NA	GO:0003674;GO:0005215;GO:0005310;GO:0005342;GO:0008509;GO:0008514;GO:0015075;GO:0015140;GO:0015318;GO:0015556;GO:0022857;GO:0046943;	GO:0006810;GO:0006811;GO:0006820;GO:0006835;GO:0008150;GO:0015711;GO:0015740;GO:0015743;GO:0015849;GO:0034220;GO:0046942;GO:0051179;GO:0051234;GO:0055085;GO:0071423;GO:0071702;GO:0098656;GO:1903825;GO:1905039;	GO:0000325;GO:0005575;GO:0005622;GO:0005623;GO:0005737;GO:0005773;GO:0005774;GO:0009705;GO:0016020;GO:0031090;GO:0043226;GO:0043227;GO:0043229;GO:0043231;GO:0044422;GO:0044424;GO:0044437;GO:0044444;GO:0044446;GO:0044464;GO:0098588;GO:0098805;	Aluminum-activated malate transporter	Aluminum-activated malate transporter
Cla97C07G128760	225	55.6202	12.4003	-2.14864	1.17e-07	9.67e-07	Down	NA	NA	NA	NA	NA	NA	Unknown protein
Cla97C07G129350	1515	4.57092	0	-4.58325	0.00647998	0.0186432	Down	NA	NA	GO:0003674;GO:0045735;	GO:0000003;GO:0001101;GO:0003006;GO:0007275;GO:0008150;GO:0009719;GO:0009725;GO:0009735;GO:0009737;GO:0009791;GO:0009987;GO:0010033;GO:0010154;GO:0010431;GO:0021700;GO:0022414;GO:0032501;GO:0032502;GO:0032504;GO:0032870;GO:0033993;GO:0042221;GO:0048316;GO:0048608;GO:0048609;GO:0048731;GO:0048856;GO:0050896;GO:0051716;GO:0061458;GO:0070887;GO:0071215;GO:0071229;GO:0071310;GO:0071396;GO:0071495;GO:…	GO:0005575;GO:0005622;GO:0005623;GO:0005737;GO:0005773;GO:0031410;GO:0031982;GO:0033095;GO:0043226;GO:0043227;GO:0043229;GO:0043231;GO:0044424;GO:0044444;GO:0044464;GO:0097708;	Seed storage protein	11S globulin subunit beta-like
Cla97C07G129890	2136	190.962	85.7766	-1.14759	3.48e-09	3.71e-08	Down	NA	NA	GO:0003674;GO:0003676;GO:0003723;GO:0003824;GO:0004518;GO:0004519;GO:0005488;GO:0016787;GO:0016788;GO:0097159;GO:1901363;	GO:0006139;GO:0006725;GO:0006807;GO:0008150;GO:0008152;GO:0009451;GO:0009987;GO:0016070;GO:0034641;GO:0043170;GO:0043412;GO:0044237;GO:0044238;GO:0046483;GO:0071704;GO:0090304;GO:0090305;GO:1901360;	GO:0005575;GO:0005622;GO:0005623;GO:0043226;GO:0043227;GO:0043229;GO:0043231;GO:0044424;GO:0044464;	Pentatricopeptide repeat-containing protein	Pentatricopeptide repeat-containing protein
Cla97C07G130010	867	22.6919	7.74056	-1.51348	0.00930639	0.0254818	Down	NA	NA	NA	NA	NA	Carbohydrate esterase	SASA domain-containing protein
Cla97C07G130560	219	121.316	50.3454	-1.25568	1.56e-06	1.05e-05	Down	NA	NA	NA	NA	NA	NA	Unknown protein
Cla97C07G130840	255	35.7101	7.51482	-2.27703	1.88e-05	0.000103064	Down	NA	NA	NA	NA	NA	NA	Unknown protein
Cla97C07G131060	237	10.494	1.72197	-2.60536	0.00841692	0.0233656	Down	NA	NA	NA	NA	NA	NA	Unknown protein
Cla97C07G131160	618	194.433	49.9544	-1.9486	1.95e-20	6.94e-19	Down	NA	NA	NA	NA	NA	Transcription factor	BHLH domain-containing protein
Cla97C07G131270	240	17.0808	5.38407	-1.65135	0.0126435	0.0331654	Down	NA	NA	NA	NA	NA	NA	Phospho-N-acetylmuramoyl-pentapeptide-transferase, putative
Cla97C07G131350	366	9.42321	1.64931	-2.47631	0.0134905	0.0350735	Down	NA	NA	GO:0003674;GO:0005198;GO:0005488;GO:0005515;GO:0030276;GO:0032050;	GO:0006810;GO:0006897;GO:0006898;GO:0008150;GO:0016192;GO:0051179;GO:0051234;GO:0072583;GO:0098657;	GO:0005575;GO:0005622;GO:0005623;GO:0005737;GO:0005829;GO:0005886;GO:0012506;GO:0016020;GO:0030117;GO:0030118;GO:0030120;GO:0030125;GO:0030135;GO:0030136;GO:0030659;GO:0030662;GO:0030665;GO:0031090;GO:0031410;GO:0031982;GO:0032991;GO:0043226;GO:0043227;GO:0043229;GO:0044422;GO:0044424;GO:0044425;GO:0044433;GO:0044444;GO:0044446;GO:0044464;GO:0048475;GO:0071944;GO:0097708;GO:0098588;GO:0098796;GO:…	CAAX protease self-immunity	Unknown protein
Cla97C07G131360	2904	17.4668	0.601599	-4.69228	0.00011068	0.000508665	Down	NA	NA	NA	NA	NA	ADP binding	Disease resistance protein
Cla97C07G131990	669	33.4827	5.44674	-2.61278	1.82e-06	1.2e-05	Down	NA	NA	NA	NA	NA	NA	cucumisin-like
Cla97C07G134460	591	31.9144	13.656	-1.22371	0.00434174	0.0131787	Down	K09338 HD-ZIP; homeobox-leucine zipper protein	NA	GO:0003674;GO:0003676;GO:0003677;GO:0003700;GO:0005488;GO:0043565;GO:0097159;GO:0140110;GO:1901363;	GO:0006355;GO:0006950;GO:0006970;GO:0008150;GO:0009628;GO:0009651;GO:0009889;GO:0010468;GO:0010556;GO:0019219;GO:0019222;GO:0031323;GO:0031326;GO:0050789;GO:0050794;GO:0050896;GO:0051171;GO:0051252;GO:0060255;GO:0065007;GO:0080090;GO:1903506;GO:2000112;GO:2001141;GO:0008152;GO:0006139;GO:0006351;GO:0006725;GO:0006807;GO:0009058;GO:0009059;GO:0009987;GO:0010467;GO:0016070;GO:0018130;GO:0019438;GO:…	GO:0005575;GO:0005622;GO:0005623;GO:0005634;GO:0043226;GO:0043227;GO:0043229;GO:0043231;GO:0044424;GO:0044464;	Homeobox-leucine zipper protein	Homeobox-leucine zipper protein
Cla97C07G134610	402	136.885	49.5708	-1.45989	1.82e-10	2.29e-09	Down	NA	NA	NA	NA	NA	NA	Unknown protein
Cla97C07G135580	639	24.2522	9.6304	-1.341	0.0101241	0.0273873	Down	NA	NA	NA	NA	NA	Retroviral aspartyl protease	Ty3/gypsy retrotransposon protein
Cla97C07G135750	546	69.0334	26.9283	-1.36069	9.15e-06	5.31e-05	Down	NA	NA	GO:0001786;GO:0003674;GO:0005488;GO:0005507;GO:0005543;GO:0008289;GO:0016151;GO:0035091;GO:0043167;GO:0043168;GO:0043169;GO:0046872;GO:0046914;GO:0070300;GO:0072341;GO:1901611;	GO:0001101;GO:0006950;GO:0008150;GO:0009266;GO:0009409;GO:0009414;GO:0009415;GO:0009628;GO:0009631;GO:0009719;GO:0009725;GO:0009737;GO:0009961;GO:0010033;GO:0010035;GO:0010243;GO:0033993;GO:0042221;GO:0043200;GO:0050896;GO:0097305;GO:1901698;GO:1901700;	GO:0005575;GO:0005622;GO:0005623;GO:0005737;GO:0005829;GO:0012506;GO:0016020;GO:0031090;GO:0031982;GO:0043226;GO:0043227;GO:0044422;GO:0044424;GO:0044444;GO:0044464;	Belongs to the plant dehydrin family	dehydrin DHN1
Cla97C07G136400	246	29.3793	12.4829	-1.22564	0.00647352	0.0186272	Down	NA	NA	NA	NA	NA	NA	Unknown protein
Cla97C07G136770	894	86.2432	15.0771	-2.51582	1.59e-14	3.35e-13	Down	NA	NA	NA	NA	NA	Protein trichome birefringence-like 42	protein trichome birefringence-like 42
Cla97C07G137080	2151	42.0236	16.9546	-1.30529	0.00161656	0.00555807	Down	NA	NA	GO:0003674;GO:0003676;GO:0003723;GO:0003824;GO:0004518;GO:0004519;GO:0005488;GO:0016787;GO:0016788;GO:0097159;GO:1901363;	GO:0000959;GO:0006139;GO:0006725;GO:0006807;GO:0008150;GO:0008152;GO:0009451;GO:0009987;GO:0016070;GO:0034641;GO:0043170;GO:0043412;GO:0044237;GO:0044238;GO:0046483;GO:0071704;GO:0090304;GO:0090305;GO:1900864;GO:1901360;	GO:0005575;GO:0005622;GO:0005623;GO:0043226;GO:0043227;GO:0043229;GO:0043231;GO:0044424;GO:0044464;	Pentatricopeptide repeat-containing protein	Pentatricopeptide repeat-containing protein
Cla97C07G137340	660	662.691	77.4017	-3.08837	3.1e-113	1.1e-110	Down	K00799 GST, gst; glutathione S-transferase [EC:2.5.1.18]	ko00480:Glutathione metabolism	GO:0003674;GO:0003824;GO:0004364;GO:0005488;GO:0005515;GO:0016740;GO:0016765;GO:0019899;GO:0033218;GO:0042277;GO:0043167;GO:0043168;GO:0043295;GO:0048037;GO:0072341;GO:1900750;GO:1901681;	GO:0001101;GO:0006518;GO:0006575;GO:0006725;GO:0006749;GO:0006790;GO:0006807;GO:0006950;GO:0006979;GO:0007154;GO:0008150;GO:0008152;GO:0009056;GO:0009266;GO:0009404;GO:0009407;GO:0009409;GO:0009414;GO:0009415;GO:0009605;GO:0009628;GO:0009635;GO:0009636;GO:0009719;GO:0009725;GO:0009735;GO:0009987;GO:0009991;GO:0010033;GO:0010035;GO:0010038;GO:0018973;GO:0018974;GO:0019326;GO:0019439;GO:0019748;GO:…	GO:0005575;GO:0005576;GO:0005622;GO:0005623;GO:0005634;GO:0005737;GO:0005773;GO:0005774;GO:0005829;GO:0005886;GO:0009507;GO:0009532;GO:0009536;GO:0009570;GO:0016020;GO:0031090;GO:0043226;GO:0043227;GO:0043229;GO:0043231;GO:0044422;GO:0044424;GO:0044434;GO:0044435;GO:0044437;GO:0044444;GO:0044446;GO:0044464;GO:0048046;GO:0071944;GO:0098588;GO:0098805;	Glutathione S-transferase	Glutathione S-transferase
Cla97C07G137590	381	22.8936	9.04895	-1.32708	0.0124064	0.0326322	Down	NA	NA	NA	NA	NA	TIFY 5A-like	Tify domain-containing protein
Cla97C07G137960	2469	193.469	92.672	-1.05215	7.49e-08	6.42e-07	Down	NA	NA	GO:0003674;GO:0003676;GO:0003723;GO:0003824;GO:0004518;GO:0004519;GO:0005488;GO:0016787;GO:0016788;GO:0097159;GO:1901363;	GO:0006139;GO:0006725;GO:0006807;GO:0008150;GO:0008152;GO:0009451;GO:0009987;GO:0016070;GO:0034641;GO:0043170;GO:0043412;GO:0044237;GO:0044238;GO:0046483;GO:0071704;GO:0090304;GO:0090305;GO:1901360;	GO:0005575;GO:0005622;GO:0005623;GO:0043226;GO:0043227;GO:0043229;GO:0043231;GO:0044424;GO:0044464;	Pentatricopeptide repeat-containing protein	Pentatricopeptide repeat-containing protein
Cla97C07G138050	279	39.3653	15.4081	-1.33866	0.00107426	0.00386446	Down	NA	NA	NA	NA	NA	NA	Unknown protein
Cla97C07G139200	342	6.80914	0	-5.16008	0.000890373	0.00327585	Down	NA	NA	NA	NA	NA	NA	Unknown protein
Cla97C07G139260	1122	38.0647	14.6111	-1.3728	0.000746111	0.00278519	Down	NA	NA	NA	GO:0000003;GO:0003006;GO:0006935;GO:0007275;GO:0008150;GO:0009553;GO:0009555;GO:0009605;GO:0009791;GO:0009856;GO:0009908;GO:0010183;GO:0022414;GO:0032501;GO:0032502;GO:0040011;GO:0042221;GO:0042330;GO:0044706;GO:0048229;GO:0048367;GO:0048437;GO:0048438;GO:0048443;GO:0048466;GO:0048608;GO:0048731;GO:0048827;GO:0048856;GO:0048868;GO:0050896;GO:0050918;GO:0051704;GO:0061458;GO:0090567;GO:0099402;	NA	SNF1-related protein kinase regulatory subunit gamma-like	SNF1-related protein kinase regulatory subunit gamma-like PV42a
Cla97C07G139290	189	27.2795	9.40245	-1.52248	0.00350773	0.0109529	Down	K20416 FAD5; palmitoyl-[glycerolipid] 7-desaturase [EC:1.14.19.42]	NA	NA	NA	NA	Palmitoyl-monogalactosyldiacylglycerol delta-7 desaturase, chloroplastic-like	Delta 9 desaturase
Cla97C07G139480	564	6.43266	0	-5.08012	0.00102998	0.00372331	Down	NA	NA	GO:0003674;GO:0003676;GO:0003677;GO:0003700;GO:0005488;GO:0043565;GO:0097159;GO:0140110;GO:1901363;	GO:0000160;GO:0001101;GO:0006355;GO:0006950;GO:0007154;GO:0007165;GO:0008150;GO:0008152;GO:0009058;GO:0009059;GO:0009414;GO:0009415;GO:0009628;GO:0009719;GO:0009723;GO:0009725;GO:0009755;GO:0009873;GO:0009889;GO:0009987;GO:0010033;GO:0010035;GO:0010143;GO:0010166;GO:0010468;GO:0010556;GO:0019219;GO:0019222;GO:0023052;GO:0031323;GO:0031326;GO:0032870;GO:0035556;GO:0042221;GO:0043170;GO:0050789;GO:…	NA	ethylene-responsive transcription factor	ethylene-responsive transcription factor WIN1-like
Cla97C07G139540	1254	65.1595	20.6696	-1.6376	2.69e-06	1.73e-05	Down	NA	NA	GO:0003674;GO:0003676;GO:0003723;GO:0003824;GO:0004518;GO:0004519;GO:0005488;GO:0016787;GO:0016788;GO:0097159;GO:1901363;	GO:0006139;GO:0006725;GO:0006807;GO:0008150;GO:0008152;GO:0009451;GO:0009987;GO:0016070;GO:0034641;GO:0043170;GO:0043412;GO:0044237;GO:0044238;GO:0046483;GO:0071704;GO:0090304;GO:0090305;GO:1901360;	GO:0005575;GO:0005622;GO:0005623;GO:0043226;GO:0043227;GO:0043229;GO:0043231;GO:0044424;GO:0044464;	Pentatricopeptide repeat-containing protein	Pentatricopeptide repeat-containing protein
Cla97C07G139660	885	152.92	74.1029	-1.04354	6.9e-08	5.95e-07	Down	K06130 LYPLA2; lysophospholipase II [EC:3.1.1.5]	ko00564:Glycerophospholipid metabolism	GO:0003674;GO:0003824;GO:0008474;GO:0016787;GO:0016788;GO:0016790;GO:0052689;GO:0098599;GO:0140096;	GO:0000902;GO:0000904;GO:0002084;GO:0006464;GO:0006807;GO:0006928;GO:0006935;GO:0007275;GO:0007399;GO:0007409;GO:0007411;GO:0008150;GO:0008152;GO:0009056;GO:0009057;GO:0009605;GO:0009653;GO:0009987;GO:0016043;GO:0019538;GO:0022008;GO:0030030;GO:0030154;GO:0030163;GO:0030182;GO:0031175;GO:0032501;GO:0032502;GO:0032989;GO:0032990;GO:0035601;GO:0036211;GO:0040011;GO:0042157;GO:0042159;GO:0042221;GO:…	GO:0005575;GO:0005622;GO:0005623;GO:0005737;GO:0005829;GO:0044424;GO:0044444;GO:0044464;	Acyl-protein thioesterase	acyl-protein thioesterase 2
Cla97C07G140160	426	48.6029	11.9739	-2.01847	1.39e-06	9.43e-06	Down	NA	NA	NA	NA	NA	NA	Unknown protein
Cla97C07G140470	279	43.8	19.0929	-1.18741	0.00232371	0.00763876	Down	NA	NA	NA	NA	NA	NA	Unknown protein
Cla97C07G141170	288	25.7896	9.23438	-1.45809	0.00497867	0.0148451	Down	NA	NA	NA	NA	NA	NA	Unknown protein
Cla97C07G141220	1119	154.441	50.7111	-1.60052	2.43e-13	4.46e-12	Down	NA	NA	NA	NA	NA	GDSL esterase lipase 1-like	GDSL esterase/lipase 1-like
Cla97C07G142400	1065	5.44095	0	-4.84001	0.00250666	0.00816476	Down	NA	NA	NA	GO:0008150;GO:0010817;GO:0032879;GO:0050789;GO:0051049;GO:0065007;GO:0065008;GO:2000012;GO:0051179;GO:0006810;GO:0051234;GO:0009914;GO:0009926;GO:0060918;	GO:0005575;GO:0005622;GO:0005623;GO:0005634;GO:0005886;GO:0016020;GO:0043226;GO:0043227;GO:0043229;GO:0043231;GO:0044424;GO:0044464;GO:0071944;	regulation of auxin polar transport	protein LAZY 1-like
Cla97C07G142430	576	53.1089	20.4311	-1.38366	9.36e-05	0.000436555	Down	NA	NA	NA	NA	NA	NA	Ciliary neurotrophic factor
Cla97C07G142520	1746	136.722	67.4533	-1.01469	1.53e-05	8.53e-05	Down	NA	NA	NA	NA	NA	Pentatricopeptide repeat-containing protein	Pentatricopeptide repeat-containing protein
Cla97C07G143430	294	90.7456	8.66254	-3.40027	1.12e-17	3.13e-16	Down	NA	NA	NA	NA	NA	Plant lipid transfer protein / seed storage protein / trypsin-alpha amylase inhibitor domain family	non-specific lipid-transfer protein 2-like
Cla97C07G143550	1392	53.9209	14.4983	-1.89993	4.1e-07	3.09e-06	Down	NA	NA	NA	NA	NA	Salutaridinol 7-O-acetyltransferase-like	salutaridinol 7-O-acetyltransferase-like
Cla97C07G143600	204	30.9393	14.0695	-1.1251	0.0147135	0.037773	Down	NA	NA	NA	NA	NA	NA	Unknown protein
Cla97C07G143770	267	3.84452	0	-4.33885	0.0147691	0.0378963	Down	NA	NA	NA	NA	NA	NA	Unknown protein
Cla97C07G143970	2882	43.1789	10.9789	-1.9769	7.57e-06	4.47e-05	Down	K14550 UTP10, HEATR1; U3 small nucleolar RNA-associated protein 10	ko03008:Ribosome biogenesis in eukaryotes	GO:0003674;GO:0003676;GO:0003723;GO:0005488;GO:0030515;GO:0097159;GO:1901363;	GO:0000462;GO:0006139;GO:0006355;GO:0006356;GO:0006364;GO:0006396;GO:0006725;GO:0006807;GO:0008150;GO:0008152;GO:0009889;GO:0009891;GO:0009893;GO:0009987;GO:0010467;GO:0010468;GO:0010556;GO:0010557;GO:0010604;GO:0010628;GO:0016070;GO:0016072;GO:0019219;GO:0019222;GO:0022613;GO:0030490;GO:0031323;GO:0031325;GO:0031326;GO:0031328;GO:0034470;GO:0034641;GO:0034660;GO:0042254;GO:0042274;GO:0043170;GO:…	GO:0005575;GO:0005622;GO:0005623;GO:0005634;GO:0005730;GO:0030684;GO:0030686;GO:0031974;GO:0031981;GO:0032040;GO:0032991;GO:0034455;GO:0043226;GO:0043227;GO:0043228;GO:0043229;GO:0043231;GO:0043232;GO:0043233;GO:0044422;GO:0044424;GO:0044428;GO:0044446;GO:0044452;GO:0044464;GO:0070013;GO:1990904;	BP28CT (NUC211) domain	BP28CT domain-containing protein
Cla97C08G144910	238	19.9713	7.86572	-1.34069	0.0156933	0.0398713	Down	NA	NA	NA	NA	NA	NA	Unknown protein
Cla97C08G145130	1269	58.1944	11.4552	-2.32949	3.76e-09	3.99e-08	Down	K19355 MAN; mannan endo-1,4-beta-mannosidase [EC:3.2.1.78]	ko00051:Fructose and mannose metabolism	GO:0003674;GO:0003824;GO:0004553;GO:0004567;GO:0015923;GO:0016787;GO:0016798;GO:0016985;	GO:0000272;GO:0005975;GO:0005976;GO:0008150;GO:0008152;GO:0009056;GO:0009057;GO:0009987;GO:0010412;GO:0016052;GO:0016998;GO:0043170;GO:0044036;GO:0044237;GO:0044238;GO:0044247;GO:0044248;GO:0044260;GO:0044262;GO:0044264;GO:0044275;GO:0046355;GO:0071554;GO:0071704;GO:1901575;	NA	Belongs to the glycosyl hydrolase 5 (cellulase A) family	Mannan endo-1,4-beta-mannosidase
Cla97C08G145600	5016	85.3229	34.1802	-1.30706	6.31e-06	3.77e-05	Down	NA	NA	NA	NA	NA	TMV resistance protein N-like	Resistance gene-like protein
Cla97C08G145610	5016	26.7912	10.0442	-1.38302	0.00940701	0.025719	Down	NA	NA	NA	NA	NA	resistance protein	Resistance gene-like protein
Cla97C08G145920	855	361.052	147.013	-1.2935	7.01e-05	0.000336679	Down	NA	NA	GO:0003674;GO:0003676;GO:0003723;GO:0003729;GO:0003730;GO:0005488;GO:0097159;GO:1901363;	GO:0000075;GO:0000077;GO:0000278;GO:0006950;GO:0006974;GO:0006977;GO:0006978;GO:0007049;GO:0007050;GO:0007093;GO:0007154;GO:0007165;GO:0007346;GO:0008150;GO:0008285;GO:0009892;GO:0009893;GO:0009894;GO:0009895;GO:0009987;GO:0010468;GO:0010564;GO:0010604;GO:0010605;GO:0010608;GO:0010628;GO:0010948;GO:0019219;GO:0019222;GO:0022402;GO:0023052;GO:0030330;GO:0031323;GO:0031324;GO:0031329;GO:0031330;GO:…	GO:0005575;GO:0005622;GO:0005623;GO:0005634;GO:0005737;GO:0005829;GO:0043226;GO:0043227;GO:0043229;GO:0043231;GO:0044424;GO:0044444;GO:0044464;	RNA-binding protein	RNA-binding protein 24
Cla97C08G146320	300	86.0156	40.5444	-1.08606	2.48e-05	0.000131852	Down	NA	NA	NA	NA	NA	NA	Unknown protein
Cla97C08G146360	300	143.574	70.5761	-1.02336	2.53e-07	1.97e-06	Down	NA	NA	NA	NA	NA	NA	Unknown protein
Cla97C08G146370	300	143.824	68.6232	-1.06755	7.57e-08	6.47e-07	Down	NA	NA	NA	NA	NA	NA	Unknown protein
Cla97C08G146390	300	143.622	69.5056	-1.04538	1.46e-07	1.18e-06	Down	NA	NA	NA	NA	NA	NA	Unknown protein
Cla97C08G146970	1155	9.92232	0.601599	-3.89435	0.00276269	0.00889828	Down	K11816 YUCCA; indole-3-pyruvate monooxygenase [EC:1.14.13.168]	ko00380:Tryptophan metabolism	NA	NA	GO:0005575;GO:0016020;	monooxygenase	Flavin-containing monooxygenase
Cla97C08G148790	252	30.5032	9.83598	-1.60148	0.0011336	0.00405157	Down	NA	NA	NA	NA	NA	NA	Unknown protein
Cla97C08G149170	396	40.8326	14.2023	-1.49963	0.00110792	0.00396539	Down	NA	NA	NA	NA	NA	NA	Unknown protein
Cla97C08G149570	1038	1972.21	979.082	-1.00873	1.29e-51	1.82e-49	Down	NA	NA	NA	NA	NA	NA	extensin-1-like
Cla97C08G149800	1266	29.0019	7.06611	-2.02022	9.82e-05	0.000457102	Down	NA	NA	GO:0003674;GO:0003700;GO:0140110;	GO:0001101;GO:0006355;GO:0006950;GO:0006952;GO:0006970;GO:0008150;GO:0009605;GO:0009607;GO:0009620;GO:0009628;GO:0009719;GO:0009725;GO:0009737;GO:0009743;GO:0009746;GO:0009749;GO:0009787;GO:0009788;GO:0009889;GO:0009891;GO:0009893;GO:0009966;GO:0009968;GO:0010033;GO:0010468;GO:0010556;GO:0010557;GO:0010604;GO:0010628;GO:0010646;GO:0010648;GO:0019219;GO:0019222;GO:0023051;GO:0023057;GO:0031323;GO:…	NA	transcription factor	Ethylene-responsive transcription factor ERF113-like protein
Cla97C08G150670	588	132.507	26.5122	-2.32504	1.95e-19	6.38e-18	Down	NA	NA	NA	NA	NA	NA	glycine-rich cell wall structural protein 2-like
Cla97C08G150810	393	10.0384	1.86728	-2.49244	0.015936	0.0403939	Down	NA	NA	NA	NA	NA	NA	Unknown protein
Cla97C08G151590	240	39.8968	17.3256	-1.18266	0.00818787	0.0228205	Down	NA	NA	NA	NA	NA	NA	Unknown protein
Cla97C08G151820	1206	6.78751	0.726951	-3.27907	0.0182572	0.0454019	Down	K01213 E3.2.1.67; galacturan 1,4-alpha-galacturonidase [EC:3.2.1.67]	ko00040:Pentose and glucuronate interconversions	NA	NA	GO:0005575;GO:0005576;GO:0005618;GO:0005623;GO:0030312;GO:0044464;GO:0071944;	Exopolygalacturonase-like	Pectin lyase-like superfamily protein
Cla97C08G152350	678	39.9703	18.9572	-1.08362	0.00562794	0.0165158	Down	K22522 LOG; cytokinin riboside 5'-monophosphate phosphoribohydrolase [EC:3.2.2.-]	NA	NA	NA	NA	Cytokinin-activating enzyme working in the direct activation pathway. Phosphoribohydrolase that converts inactive cytokinin nucleotides to the biologically active free-base forms	Cytokinin riboside 5'-monophosphate phosphoribohydrolase
Cla97C08G152880	666	26.9966	11.2069	-1.27688	0.00976033	0.0265452	Down	NA	NA	NA	NA	NA	NA	Transmembrane protein, putative
Cla97C08G153370	1008	26.908	8.15654	-1.7156	0.000726936	0.00272466	Down	NA	NA	NA	GO:0006810;GO:0008150;GO:0009914;GO:0009966;GO:0009967;GO:0010646;GO:0010647;GO:0010817;GO:0010928;GO:0010929;GO:0023051;GO:0023056;GO:0048518;GO:0048522;GO:0048583;GO:0048584;GO:0050789;GO:0050794;GO:0051179;GO:0051234;GO:0060918;GO:0065007;GO:0065008;GO:0007165;GO:0007154;GO:0009987;GO:0023052;GO:0050896;GO:0051716;GO:0009719;GO:0009725;GO:0009733;GO:0009734;GO:0009755;GO:0010033;GO:0070887;GO:…	GO:0005575;GO:0005623;GO:0005886;GO:0016020;GO:0044464;GO:0071944;	NA	Protein BIG GRAIN 1-like E
Cla97C08G153430	204	26.2025	0	-7.10825	2.55e-08	2.36e-07	Down	NA	NA	NA	NA	NA	NA	Unknown protein
Cla97C08G153830	342	239.925	112.139	-1.0868	3.05e-08	2.79e-07	Down	NA	NA	NA	NA	NA	NA	Unknown protein
Cla97C08G154510	162	100.206	35.5587	-1.47978	1.03e-07	8.61e-07	Down	K18810 CYCD1_2_4; cyclin D1/2/4, plant	NA	NA	NA	NA	NA	conserved peptide upstream open reading frame 37
Cla97C08G154520	318	35.6378	9.97112	-1.84258	7.44e-05	0.000354141	Down	NA	NA	NA	NA	NA	NA	Unknown protein
Cla97C08G154600	6572	853.194	392.212	-1.1197	1.06e-06	7.36e-06	Down	NA	NA	NA	GO:0000003;GO:0000902;GO:0000904;GO:0001558;GO:0003006;GO:0006950;GO:0007154;GO:0007275;GO:0008150;GO:0009267;GO:0009605;GO:0009653;GO:0009826;GO:0009856;GO:0009860;GO:0009888;GO:0009932;GO:0009966;GO:0009968;GO:0009987;GO:0009991;GO:0010015;GO:0010053;GO:0010054;GO:0010104;GO:0010105;GO:0010646;GO:0010648;GO:0016036;GO:0016043;GO:0016049;GO:0021700;GO:0022414;GO:0022622;GO:0023051;GO:0023057;GO:…	GO:0005575;GO:0005623;GO:0030427;GO:0035618;GO:0035619;GO:0035838;GO:0042995;GO:0044463;GO:0044464;GO:0051286;GO:0090404;GO:0090406;GO:0120025;GO:0120038;	pollen tube development	Fmp27_GFWDK domain-containing protein
Cla97C08G155000	453	443.305	195.829	-1.17205	8.04e-17	2.08e-15	Down	NA	NA	NA	NA	NA	NA	Unknown protein
Cla97C08G155370	462	63.67	27.6954	-1.20205	9.48e-05	0.000442029	Down	NA	NA	NA	NA	NA	ultraviolet-B receptor	Regulator of chromosome condensation (RCC1) family protein
Cla97C08G157150	285	36.7352	8.92341	-2.04384	1.22e-05	6.92e-05	Down	NA	NA	NA	NA	NA	NA	Unknown protein
Cla97C08G157310	705	78.6735	28.3371	-1.46502	1.45e-06	9.83e-06	Down	K08869 ADCK, ABC1; aarF domain-containing kinase	NA	NA	NA	NA	AarF domain-containing protein kinase	ABC1 domain-containing protein
Cla97C08G157460	630	540.132	234.382	-1.20816	5.85e-27	3.23e-25	Down	NA	NA	NA	NA	NA	Divergent CRAL/TRIO domain	CRAL-TRIO domain-containing protein
Cla97C08G157760	2454	38163.3	12311.3	-1.63184	0	0	Down	K09487 HSP90B, TRA1; heat shock protein 90kDa beta	ko04141:Protein processing in endoplasmic reticulum|ko04626:Plant-pathogen interaction	GO:0003674;GO:0003824;GO:0016462;GO:0016787;GO:0016817;GO:0016818;GO:0016887;GO:0017111;	GO:0001101;GO:0002790;GO:0006810;GO:0006950;GO:0006970;GO:0008104;GO:0008150;GO:0009266;GO:0009306;GO:0009409;GO:0009414;GO:0009415;GO:0009628;GO:0009651;GO:0009888;GO:0009934;GO:0009987;GO:0010035;GO:0010038;GO:0010073;GO:0010075;GO:0015031;GO:0015833;GO:0022603;GO:0032501;GO:0032502;GO:0032940;GO:0033036;GO:0033554;GO:0034976;GO:0040008;GO:0042221;GO:0042886;GO:0045184;GO:0046686;GO:0046903;GO:…	GO:0005575;GO:0005576;GO:0005622;GO:0005623;GO:0005634;GO:0005737;GO:0005739;GO:0005773;GO:0005774;GO:0005783;GO:0005788;GO:0005886;GO:0005911;GO:0009506;GO:0009507;GO:0009536;GO:0012505;GO:0016020;GO:0030054;GO:0031090;GO:0031974;GO:0043226;GO:0043227;GO:0043229;GO:0043231;GO:0043233;GO:0044422;GO:0044424;GO:0044432;GO:0044437;GO:0044444;GO:0044446;GO:0044464;GO:0048046;GO:0055044;GO:0070013;GO:…	Endoplasmin homolog	endoplasmin homolog
Cla97C08G158230	2673	186.188	59.3612	-1.63984	5.85e-13	1.02e-11	Down	NA	NA	NA	NA	NA	Pentatricopeptide repeat-containing protein	Pentatricopeptide repeat-containing protein
Cla97C08G158420	1434	71.6611	34.3683	-1.05027	0.000274708	0.00114759	Down	NA	NA	GO:0003674;GO:0003824;GO:0004497;GO:0010295;GO:0016491;GO:0016705;GO:0016709;	GO:0006629;GO:0006694;GO:0007275;GO:0008150;GO:0008152;GO:0008202;GO:0008610;GO:0009058;GO:0010268;GO:0010817;GO:0016125;GO:0016128;GO:0016129;GO:0016131;GO:0016132;GO:0032501;GO:0032502;GO:0042445;GO:0042446;GO:0042592;GO:0044238;GO:0048856;GO:0048878;GO:0055088;GO:0055114;GO:0065007;GO:0065008;GO:0071704;GO:1901360;GO:1901362;GO:1901576;GO:1901615;GO:1901617;	NA	Belongs to the cytochrome P450 family	abscisic acid 8'-hydroxylase 1
Cla97C08G158710	252	61.8509	29.7684	-1.04274	0.00108959	0.00391295	Down	NA	NA	NA	NA	NA	NA	Unknown protein
Cla97C08G159520	1302	20.9954	8.63259	-1.29021	0.0183041	0.0454962	Down	K09843 CYP707A; (+)-abscisic acid 8'-hydroxylase [EC:1.14.14.137]	ko00906:Carotenoid biosynthesis	GO:0003674;GO:0003824;GO:0004497;GO:0010295;GO:0016491;GO:0016705;GO:0016709;	GO:0006629;GO:0006694;GO:0007275;GO:0008150;GO:0008152;GO:0008202;GO:0008610;GO:0009058;GO:0010268;GO:0010817;GO:0016125;GO:0016128;GO:0016129;GO:0016131;GO:0016132;GO:0032501;GO:0032502;GO:0042445;GO:0042446;GO:0042592;GO:0044238;GO:0048856;GO:0048878;GO:0055088;GO:0055114;GO:0065007;GO:0065008;GO:0071704;GO:1901360;GO:1901362;GO:1901576;GO:1901615;GO:1901617;	NA	Belongs to the cytochrome P450 family	Abscisic acid 8'-hydroxylase 4-like
Cla97C08G159610	252	45.6963	22.4115	-1.01215	0.00585501	0.0170979	Down	NA	NA	NA	NA	NA	NA	Unknown protein
Cla97C08G159720	264	44.4514	19.579	-1.17457	0.00221797	0.00735087	Down	NA	NA	NA	NA	NA	NA	Unknown protein
Cla97C08G159830	867	20.5593	2.1056	-3.16477	0.000129578	0.00058607	Down	NA	NA	NA	NA	NA	Carbohydrate esterase	SASA domain-containing protein
Cla97C08G159840	831	21.7969	5.13615	-2.04156	0.00168957	0.00577457	Down	NA	NA	NA	NA	NA	Carbohydrate esterase	SASA domain-containing protein
Cla97C08G159860	867	31.953	6.65013	-2.21276	0.000165348	0.000728641	Down	NA	NA	NA	NA	NA	Carbohydrate esterase	SASA domain-containing protein
Cla97C08G160840	1812	32.5611	13.2725	-1.29135	0.00271951	0.00877735	Down	K12778 HORMAD, HOP1; meiosis-specific protein	NA	NA	GO:0000003;GO:0000280;GO:0003006;GO:0006139;GO:0006259;GO:0006310;GO:0006725;GO:0006807;GO:0006996;GO:0007049;GO:0007059;GO:0007127;GO:0007129;GO:0007131;GO:0007275;GO:0008150;GO:0008152;GO:0009553;GO:0009554;GO:0009555;GO:0009556;GO:0009987;GO:0016043;GO:0019953;GO:0022402;GO:0022414;GO:0022607;GO:0032501;GO:0032502;GO:0034293;GO:0034641;GO:0035825;GO:0043170;GO:0043934;GO:0044085;GO:0044237;GO:…	GO:0000228;GO:0000785;GO:0000793;GO:0000794;GO:0005575;GO:0005622;GO:0005623;GO:0005634;GO:0005654;GO:0005694;GO:0031974;GO:0031981;GO:0043226;GO:0043227;GO:0043228;GO:0043229;GO:0043231;GO:0043232;GO:0043233;GO:0044422;GO:0044424;GO:0044427;GO:0044428;GO:0044446;GO:0044464;GO:0070013;	HORMA domain	meiosis-specific protein ASY1
Cla97C08G160940	231	44.5944	13.3027	-1.72531	2.58e-05	0.000136639	Down	NA	NA	NA	NA	NA	NA	Unknown protein
Cla97C08G161110	1332	60.1584	13.4053	-2.14822	9.91e-09	9.87e-08	Down	K13065 E2.3.1.133, HCT; shikimate O-hydroxycinnamoyltransferase [EC:2.3.1.133]	ko00940:Phenylpropanoid biosynthesis|ko00941:Flavonoid biosynthesis|ko00945:Stilbenoid, diarylheptanoid and gingerol biosynthesis	GO:0003674;GO:0003824;GO:0016740;GO:0016746;GO:0016747;GO:0050636;	GO:0006807;GO:0008150;GO:0008152;GO:0009820;GO:0071704;GO:1901564;	NA	Vinorine synthase-like	Vinorine synthase-like
Cla97C08G161220	156	50.0301	13.7787	-1.84633	6.3e-06	3.77e-05	Down	NA	NA	NA	NA	NA	NA	Unknown protein
Cla97C08G161240	1224	147.368	41.1659	-1.84152	1.84e-16	4.61e-15	Down	K01728 pel; pectate lyase [EC:4.2.2.2]	ko00040:Pentose and glucuronate interconversions	NA	NA	NA	Pectate lyase	Pectate lyase
Cla97C08G161470	210	28.181	13.3879	-1.07481	0.0193412	0.0476759	Down	NA	NA	NA	NA	NA	NA	Unknown protein
Cla97C08G161510	1056	65.7454	25.8106	-1.35797	3.02e-05	0.000157448	Down	K16903 TAA1; L-tryptophan---pyruvate aminotransferase [EC:2.6.1.99]	ko00380:Tryptophan metabolism	GO:0003674;GO:0003824;GO:0004021;GO:0004838;GO:0005488;GO:0008144;GO:0008483;GO:0008793;GO:0010326;GO:0016740;GO:0016769;GO:0019842;GO:0030170;GO:0036094;GO:0043167;GO:0043168;GO:0047312;GO:0047635;GO:0048037;GO:0050048;GO:0050362;GO:0050662;GO:0070279;GO:0070529;GO:0070546;GO:0070547;GO:0070548;GO:0080097;GO:0080098;GO:0080099;GO:0080100;GO:0080130;GO:0097159;GO:1901363;	GO:0000003;GO:0003006;GO:0006082;GO:0006725;GO:0006807;GO:0006810;GO:0006950;GO:0006952;GO:0007275;GO:0008150;GO:0008152;GO:0009058;GO:0009314;GO:0009416;GO:0009605;GO:0009606;GO:0009607;GO:0009617;GO:0009628;GO:0009629;GO:0009630;GO:0009639;GO:0009641;GO:0009653;GO:0009683;GO:0009684;GO:0009719;GO:0009723;GO:0009725;GO:0009791;GO:0009850;GO:0009851;GO:0009888;GO:0009908;GO:0009914;GO:0009926;GO:…	GO:0005575;GO:0005622;GO:0005623;GO:0005737;GO:0044424;GO:0044464;	L-tryptophan--pyruvate aminotransferase 1-like	L-tryptophan--pyruvate aminotransferase 1-like
Cla97C09G161980	216	47.9951	7.34695	-2.68716	2.09e-08	1.97e-07	Down	NA	NA	NA	NA	NA	NA	Unknown protein
Cla97C09G163340	399	20.2471	7.22141	-1.48888	0.00917125	0.0251458	Down	NA	NA	NA	NA	NA	NA	Unknown protein
Cla97C09G163820	4410	121.345	39.1408	-1.62523	8.98e-10	1.02e-08	Down	NA	NA	NA	NA	NA	AAA domain	Helicase SEN1 isoform X4
Cla97C09G163860	2295	6.98426	0	-5.20255	0.000627741	0.00239571	Down	K15820 IMS1; isomultiflorenol synthase [EC:5.4.99.36]	ko00909:Sesquiterpenoid and triterpenoid biosynthesis	GO:0003674;GO:0003824;GO:0016853;GO:0016866;GO:0031559;GO:0034074;GO:0034075;GO:0042299;GO:0051746;GO:0080011;	GO:0006629;GO:0006720;GO:0006721;GO:0006722;GO:0007275;GO:0008150;GO:0008152;GO:0008299;GO:0008610;GO:0009058;GO:0009987;GO:0010263;GO:0010683;GO:0010685;GO:0010686;GO:0016104;GO:0016114;GO:0022622;GO:0032501;GO:0032502;GO:0044237;GO:0044238;GO:0044249;GO:0044255;GO:0048364;GO:0048731;GO:0048856;GO:0071704;GO:0080003;GO:0099402;GO:1901360;GO:1901362;GO:1901576;	GO:0005575;GO:0005622;GO:0005623;GO:0005737;GO:0005783;GO:0005911;GO:0009506;GO:0012505;GO:0030054;GO:0043226;GO:0043227;GO:0043229;GO:0043231;GO:0044424;GO:0044444;GO:0044464;GO:0055044;	Belongs to the terpene cyclase mutase family	Terpene cyclase/mutase family member
Cla97C09G164410	360	8.10908	0	-5.42227	0.000316099	0.00130302	Down	NA	NA	NA	NA	NA	Thionin-like protein 2	thionin-like protein 2
Cla97C09G164420	354	13.4808	2.29362	-2.52405	0.00475315	0.0142693	Down	NA	NA	NA	NA	NA	Thionin-like protein 2	thionin-like protein 2
Cla97C09G164500	552	435.296	204.354	-1.08946	2.46e-19	7.97e-18	Down	K14484 IAA; auxin-responsive protein IAA	ko04075:Plant hormone signal transduction	GO:0003674;GO:0003700;GO:0140110;	GO:0000003;GO:0003006;GO:0006355;GO:0007275;GO:0008150;GO:0009314;GO:0009416;GO:0009628;GO:0009639;GO:0009640;GO:0009704;GO:0009719;GO:0009725;GO:0009733;GO:0009791;GO:0009889;GO:0009908;GO:0010033;GO:0010468;GO:0010556;GO:0019219;GO:0019222;GO:0022414;GO:0031323;GO:0031326;GO:0032501;GO:0032502;GO:0042221;GO:0048367;GO:0048437;GO:0048438;GO:0048443;GO:0048466;GO:0048608;GO:0048731;GO:0048827;GO:…	GO:0005575;GO:0005622;GO:0005623;GO:0005634;GO:0043226;GO:0043227;GO:0043229;GO:0043231;GO:0044424;GO:0044464;	Aux IAA proteins are short-lived transcriptional factors that function as repressors of early auxin response genes at low auxin concentrations	Auxin-responsive protein
Cla97C09G165540	1359	44.4369	20.8903	-1.0827	0.00719393	0.0204473	Down	NA	NA	NA	NA	NA	Protein ROOT PRIMORDIUM DEFECTIVE	Protein ROOT PRIMORDIUM DEFECTIVE 1
Cla97C09G165880	1221	42.2456	17.4736	-1.26418	0.00117803	0.00419483	Down	NA	NA	NA	NA	NA	Domain of unknown function (DUF966)	protein UPSTREAM OF FLC isoform X1
Cla97C09G166420	375	33.193	7.37689	-2.1537	2.73e-05	0.000143811	Down	NA	NA	NA	NA	NA	NA	Unknown protein
Cla97C09G166730	1515	88.1778	30.2998	-1.5338	6.38e-08	5.52e-07	Down	NA	NA	NA	GO:0006950;GO:0006952;GO:0007154;GO:0007165;GO:0008150;GO:0009987;GO:0023052;GO:0050789;GO:0050794;GO:0050896;GO:0051716;GO:0065007;	GO:0005575;GO:0005623;GO:0005886;GO:0016020;GO:0044464;GO:0071944;	Belongs to the disease resistance NB-LRR family	disease resistance protein RGA2-like
Cla97C09G167170	783	61.2915	5.56211	-3.47678	3.47e-13	6.23e-12	Down	NA	NA	NA	NA	NA	Short-chain dehydrogenase reductase	Short-chain dehydrogenase reductase 3b-like
Cla97C09G167270	834	21.6001	9.06873	-1.267	0.0190792	0.0471159	Down	K09422 MYBP; transcription factor MYB, plant	NA	NA	NA	NA	transcription factor	Transcription factor MYB108-like protein
Cla97C09G168260	1380	4.67255	0	-4.62733	0.00636013	0.0183505	Down	K01213 E3.2.1.67; galacturan 1,4-alpha-galacturonidase [EC:3.2.1.67]	ko00040:Pentose and glucuronate interconversions	GO:0003674;GO:0003824;GO:0004553;GO:0004650;GO:0016787;GO:0016798;	NA	GO:0005575;GO:0005576;GO:0005618;GO:0005623;GO:0030312;GO:0044464;GO:0071944;	Exopolygalacturonase clone	Exopolygalacturonase-like
Cla97C09G168640	930	11.9743	0	-5.97496	1.98e-05	0.000108119	Down	NA	NA	NA	NA	NA	Desiccation-related protein PCC13-62-like	desiccation-related protein PCC13-62-like
Cla97C09G168850	396	36.2941	14.9418	-1.27328	0.00185232	0.00625999	Down	K03676 grxC, GLRX, GLRX2; glutaredoxin 3	NA	NA	NA	NA	Monothiol	Glutaredoxin
Cla97C09G169170	1554	60.933	26.6327	-1.17308	0.00131323	0.00462647	Down	NA	NA	NA	NA	NA	NA	SWIM-type domain-containing protein
Cla97C09G169260	282	73.2736	32.29	-1.17144	8.75e-05	0.000410708	Down	NA	NA	NA	NA	NA	NA	Unknown protein
Cla97C09G169440	291	9.12085	0.373456	-4.61837	0.00128621	0.00454168	Down	NA	NA	NA	NA	NA	NA	Unknown protein
Cla97C09G169600	846	63.8327	18.6365	-1.78128	1.08e-07	9e-07	Down	NA	NA	NA	NA	NA	Fantastic Four meristem regulator	protein FANTASTIC FOUR 3-like
Cla97C09G169970	276	35.0226	14.1522	-1.29882	0.00279478	0.00899161	Down	NA	NA	NA	NA	NA	NA	Unknown protein
Cla97C09G170160	702	1766.89	802.604	-1.13811	1.32e-69	3.01e-67	Down	K14484 IAA; auxin-responsive protein IAA	ko04075:Plant hormone signal transduction	NA	NA	NA	Aux IAA proteins are short-lived transcriptional factors that function as repressors of early auxin response genes at low auxin concentrations	Auxin-responsive protein
Cla97C09G170180	1527	7.84285	1.09043	-2.89383	0.0174577	0.0436819	Down	NA	NA	GO:0003674;GO:0003824;GO:0004620;GO:0004806;GO:0008970;GO:0016298;GO:0016787;GO:0016788;GO:0047714;GO:0052689;	NA	GO:0005575;GO:0005622;GO:0005623;GO:0005737;GO:0009507;GO:0009536;GO:0043226;GO:0043227;GO:0043229;GO:0043231;GO:0044424;GO:0044444;GO:0044464;	Phospholipase A1-Igamma2, chloroplastic-like	phospholipase A1-Igamma2, chloroplastic
Cla97C09G170700	1185	299.401	107.938	-1.46105	2.26e-14	4.69e-13	Down	NA	NA	GO:0000976;GO:0001067;GO:0003674;GO:0003676;GO:0003677;GO:0003690;GO:0003700;GO:0003824;GO:0005488;GO:0008168;GO:0008276;GO:0016740;GO:0016741;GO:0032451;GO:0032452;GO:0032453;GO:0042054;GO:0043565;GO:0044212;GO:0097159;GO:0140096;GO:0140110;GO:1901363;GO:1990837;	GO:0000003;GO:0003006;GO:0006139;GO:0006259;GO:0006325;GO:0006355;GO:0006464;GO:0006479;GO:0006482;GO:0006725;GO:0006807;GO:0006996;GO:0007275;GO:0008150;GO:0008152;GO:0008213;GO:0008214;GO:0009314;GO:0009416;GO:0009628;GO:0009648;GO:0009791;GO:0009889;GO:0009890;GO:0009892;GO:0009909;GO:0009910;GO:0009987;GO:0010216;GO:0010228;GO:0010468;GO:0010556;GO:0010558;GO:0010605;GO:0010629;GO:0016043;GO:…	GO:0005575;GO:0005622;GO:0005623;GO:0005634;GO:0043226;GO:0043227;GO:0043229;GO:0043231;GO:0044424;GO:0044464;	lysine-specific demethylase	Transcription factor jumonji (jmj) family protein / zinc finger (C5HC2 type) family protein
Cla97C09G170710	243	20.997	4.33654	-2.21445	0.00340138	0.0106619	Down	NA	NA	NA	NA	NA	NA	Unknown protein
Cla97C09G170920	1845	766.796	298.628	-1.35862	5.11e-07	3.77e-06	Down	K06636 SMC1; structural maintenance of chromosome 1	NA	GO:0003674;GO:0005215;	GO:0000819;GO:0006996;GO:0007049;GO:0007059;GO:0007062;GO:0008150;GO:0009987;GO:0016043;GO:0022402;GO:0051276;GO:0071840;GO:0098813;	GO:0000793;GO:0005575;GO:0005622;GO:0005623;GO:0005694;GO:0005737;GO:0008278;GO:0009507;GO:0009536;GO:0032991;GO:0043226;GO:0043227;GO:0043228;GO:0043229;GO:0043231;GO:0043232;GO:0044422;GO:0044424;GO:0044427;GO:0044444;GO:0044446;GO:0044464;	Structural maintenance of chromosomes protein	Structural maintenance of chromosomes protein
Cla97C09G171010	408	220.916	0	-10.183	1.21e-17	3.35e-16	Down	NA	NA	NA	NA	NA	NA	Unknown protein
Cla97C09G171130	210	28.2125	6.69265	-2.05589	0.000106841	0.000492475	Down	NA	NA	NA	NA	NA	NA	Unknown protein
Cla97C09G171760	312	8.41608	0.965074	-3.05938	0.0111589	0.0298081	Down	NA	NA	NA	NA	NA	NA	Unknown protein
Cla97C09G171860	1365	20.8406	5.87308	-1.79113	0.0034856	0.0108922	Down	NA	NA	GO:0003674;GO:0003824;GO:0004672;GO:0004674;GO:0004675;GO:0004888;GO:0016301;GO:0016740;GO:0016772;GO:0016773;GO:0019199;GO:0038023;GO:0060089;GO:0140096;	GO:0006464;GO:0006468;GO:0006793;GO:0006796;GO:0006807;GO:0007154;GO:0007165;GO:0007166;GO:0007167;GO:0007178;GO:0008150;GO:0008152;GO:0009987;GO:0016310;GO:0019538;GO:0023052;GO:0036211;GO:0043170;GO:0043412;GO:0044237;GO:0044238;GO:0044260;GO:0044267;GO:0050789;GO:0050794;GO:0050896;GO:0051716;GO:0065007;GO:0071704;GO:1901564;	GO:0005575;GO:0005623;GO:0005886;GO:0016020;GO:0044464;GO:0071944;	Belongs to the protein kinase superfamily	Protein kinase domain-containing protein
Cla97C09G171910	318	26.3514	8.14396	-1.66087	0.00334603	0.0105096	Down	NA	NA	NA	NA	NA	NA	Unknown protein
Cla97C09G172720	1086	1151.34	555.623	-1.05381	2.12e-31	1.53e-29	Down	NA	NA	NA	NA	NA	NA	Extensin-3-like
Cla97C09G172790	747	31.6222	1.94013	-3.95876	1.19e-07	9.84e-07	Down	NA	NA	NA	NA	NA	NA	extensin-like
Cla97C09G173100	258	62.1706	29.385	-1.06967	0.00229669	0.00757207	Down	NA	NA	NA	NA	NA	NA	Unknown protein
Cla97C09G173270	912	10.2031	0	-5.74819	5.34e-05	0.000262916	Down	NA	NA	GO:0001067;GO:0003674;GO:0003676;GO:0003677;GO:0003700;GO:0005488;GO:0005515;GO:0042802;GO:0042803;GO:0043565;GO:0044212;GO:0046982;GO:0046983;GO:0097159;GO:0140110;GO:1901363;	GO:0001101;GO:0005975;GO:0005976;GO:0006355;GO:0006950;GO:0006952;GO:0008150;GO:0008152;GO:0009605;GO:0009607;GO:0009620;GO:0009719;GO:0009725;GO:0009733;GO:0009735;GO:0009737;GO:0009741;GO:0009888;GO:0009889;GO:0009891;GO:0009893;GO:0009987;GO:0010033;GO:0010087;GO:0010089;GO:0010383;GO:0010410;GO:0010468;GO:0010556;GO:0010557;GO:0010604;GO:0010628;GO:0014070;GO:0019219;GO:0019222;GO:0030154;GO:…	GO:0005575;GO:0005622;GO:0005623;GO:0005634;GO:0043226;GO:0043227;GO:0043229;GO:0043231;GO:0044424;GO:0044464;	NAC domain-containing protein	NAC domain-containing protein
Cla97C09G174220	1146	97.8556	39.0681	-1.3117	3.89e-06	2.43e-05	Down	NA	NA	GO:0003674;GO:0003676;GO:0003723;GO:0003824;GO:0004518;GO:0004519;GO:0005488;GO:0016787;GO:0016788;GO:0097159;GO:1901363;	GO:0006139;GO:0006725;GO:0006807;GO:0008150;GO:0008152;GO:0009451;GO:0009987;GO:0016070;GO:0034641;GO:0043170;GO:0043412;GO:0044237;GO:0044238;GO:0046483;GO:0071704;GO:0090304;GO:0090305;GO:1901360;	GO:0005575;GO:0005622;GO:0005623;GO:0043226;GO:0043227;GO:0043229;GO:0043231;GO:0044424;GO:0044464;	Pentatricopeptide repeat-containing protein	Pentatricopeptide repeat-containing protein
Cla97C09G174320	1047	227.642	112.547	-1.01665	3.09e-09	3.32e-08	Down	K08235 E2.4.1.207; xyloglucan:xyloglucosyl transferase [EC:2.4.1.207]	NA	NA	NA	NA	Catalyzes xyloglucan endohydrolysis (XEH) and or endotransglycosylation (XET). Cleaves and religates xyloglucan polymers, an essential constituent of the primary cell wall, and thereby participates in cell wall construction of growing tissues	Xyloglucan endotransglucosylase/hydrolase
Cla97C09G175080	1446	3.52116	0	-4.21223	0.0191703	0.0473065	Down	K25486 CYP88L2; cucurbitadienol 19-hydroxylase [EC:1.14.14.-]	ko00996:Biosynthesis of various alkaloids	NA	NA	NA	Belongs to the cytochrome P450 family	beta-amyrin 11-oxidase-like
Cla97C09G175860	918	12.8388	2.83255	-2.11314	0.0113484	0.0302374	Down	NA	NA	NA	NA	NA	Phosphate-induced protein 1 conserved region	protein EXORDIUM-like 2
Cla97C09G176050	474	103.297	0	-9.0862	4.76e-14	9.42e-13	Down	NA	NA	NA	NA	NA	NA	Protein TIC 214
Cla97C09G176180	561	34.4639	14.2576	-1.26487	0.00251433	0.00818562	Down	NA	NA	GO:0003674;GO:0003676;GO:0003677;GO:0003700;GO:0005488;GO:0043565;GO:0097159;GO:0140110;GO:1901363;	GO:0006355;GO:0007275;GO:0008150;GO:0009314;GO:0009416;GO:0009628;GO:0009639;GO:0009640;GO:0009641;GO:0009791;GO:0009889;GO:0010468;GO:0010556;GO:0019219;GO:0019222;GO:0031323;GO:0031326;GO:0032501;GO:0032502;GO:0048856;GO:0050789;GO:0050794;GO:0050896;GO:0051171;GO:0051252;GO:0060255;GO:0065007;GO:0080090;GO:1903506;GO:2000112;GO:2001141;GO:0008152;GO:0006139;GO:0006351;GO:0006725;GO:0006807;GO:…	GO:0005575;GO:0005622;GO:0005623;GO:0005634;GO:0043226;GO:0043227;GO:0043229;GO:0043231;GO:0044424;GO:0044464;	ZINC FINGER protein	Zinc finger, B-box
Cla97C09G177290	990	35.7533	7.7204	-2.19511	5.86e-06	3.53e-05	Down	K00430 E1.11.1.7; peroxidase [EC:1.11.1.7]	ko00940:Phenylpropanoid biosynthesis	GO:0003674;GO:0003676;GO:0003723;GO:0003729;GO:0003824;GO:0004601;GO:0005488;GO:0016209;GO:0016491;GO:0016684;GO:0097159;GO:1901363;	GO:0008150;GO:0008152;GO:0009636;GO:0009664;GO:0009987;GO:0016043;GO:0042221;GO:0045229;GO:0050896;GO:0051716;GO:0055114;GO:0070887;GO:0071554;GO:0071555;GO:0071669;GO:0071840;GO:0097237;GO:0098754;GO:0098869;GO:1990748;	GO:0005575;GO:0005618;GO:0005623;GO:0005886;GO:0005911;GO:0009505;GO:0009506;GO:0016020;GO:0030054;GO:0030312;GO:0044464;GO:0055044;GO:0071944;	Belongs to the peroxidase family. Classical plant (class III) peroxidase subfamily	Peroxidase
Cla97C09G177900	744	95.3665	36.6713	-1.38187	6.86e-07	4.93e-06	Down	NA	NA	NA	GO:0006139;GO:0006206;GO:0006208;GO:0006212;GO:0006725;GO:0006807;GO:0008150;GO:0008152;GO:0009056;GO:0009112;GO:0009987;GO:0017144;GO:0019860;GO:0034641;GO:0042737;GO:0044237;GO:0044238;GO:0044248;GO:0044270;GO:0044281;GO:0046113;GO:0046483;GO:0046700;GO:0055086;GO:0071704;GO:0072527;GO:0072529;GO:1901360;GO:1901361;GO:1901564;GO:1901565;GO:1901575;	GO:0005575;GO:0005622;GO:0005623;GO:0005737;GO:0044424;GO:0044464;	Isochorismatase family	nicotinamidase 1-like
Cla97C09G178330	231	12.9138	2.30361	-2.45661	0.00394028	0.0121203	Down	NA	NA	NA	NA	NA	NA	Unknown protein
Cla97C09G179560	252	23.6512	9.47511	-1.30716	0.0128992	0.0337224	Down	NA	NA	NA	NA	NA	NA	Unknown protein
Cla97C09G180040	954	23.3809	4.30641	-2.40875	0.000231364	0.000982958	Down	NA	NA	NA	NA	NA	metalloendoproteinase 1-like	Metalloendoproteinase 2-MMP-like
Cla97C09G180050	939	38.5308	12.8362	-1.59085	0.000183937	0.000800963	Down	NA	NA	NA	NA	NA	metalloendoproteinase 1-like	metalloendoproteinase 2-MMP-like
Cla97C09G180250	192	37.0687	17.9097	-1.03927	0.0125641	0.0329913	Down	NA	NA	NA	NA	NA	NA	Unknown protein
Cla97C09G180450	300	38.1203	10.6957	-1.80185	0.00037623	0.00152298	Down	NA	NA	NA	NA	NA	NA	Unknown protein
Cla97C09G181470	624	184.243	67.4927	-1.45255	1.97e-13	3.65e-12	Down	NA	NA	NA	NA	NA	helix loop helix domain	basic helix-loop-helix (bHLH) DNA-binding superfamily protein
Cla97C09G184140	786	57.0968	21.785	-1.40335	7.5e-05	0.000356527	Down	NA	NA	NA	NA	NA	ZINC FINGER protein	Zinc finger protein CONSTANS-LIKE 5
Cla97C09G184530	963	43.0115	20.5295	-1.06287	0.00759676	0.0214238	Down	NA	NA	GO:0003674;GO:0003700;GO:0140110;	GO:0003002;GO:0006355;GO:0007275;GO:0007389;GO:0008150;GO:0009832;GO:0009834;GO:0009889;GO:0009987;GO:0010453;GO:0010455;GO:0010468;GO:0010556;GO:0019219;GO:0019222;GO:0022622;GO:0031323;GO:0031326;GO:0032501;GO:0032502;GO:0042546;GO:0044085;GO:0045595;GO:0045597;GO:0048364;GO:0048518;GO:0048522;GO:0048731;GO:0048829;GO:0048856;GO:0050789;GO:0050793;GO:0050794;GO:0051094;GO:0051171;GO:0051252;GO:…	GO:0005575;GO:0005622;GO:0005623;GO:0005634;GO:0043226;GO:0043227;GO:0043229;GO:0043231;GO:0044424;GO:0044464;	NAC domain-containing protein	NAC domain-containing protein
Cla97C10G185360	1470	2749.78	1286.33	-1.09675	4.83e-81	1.3e-78	Down	NA	NA	NA	NA	NA	Endoglucanase	Endoglucanase
Cla97C10G185410	222	26.4243	9.17152	-1.51905	0.00346234	0.0108312	Down	NA	NA	NA	NA	NA	NA	Unknown protein
Cla97C10G185490	2310	739.726	340.2	-1.11542	7.72e-26	4.07e-24	Down	NA	NA	GO:0003674;GO:0003700;GO:0003824;GO:0004672;GO:0004674;GO:0016301;GO:0016740;GO:0016772;GO:0016773;GO:0140096;GO:0140110;	GO:0000003;GO:0000280;GO:0003006;GO:0006355;GO:0006464;GO:0006468;GO:0006793;GO:0006796;GO:0006807;GO:0006996;GO:0007049;GO:0007140;GO:0007154;GO:0007165;GO:0007275;GO:0007276;GO:0008150;GO:0008152;GO:0009719;GO:0009725;GO:0009733;GO:0009791;GO:0009888;GO:0009889;GO:0009987;GO:0010033;GO:0010087;GO:0010089;GO:0010154;GO:0010468;GO:0010556;GO:0016043;GO:0016310;GO:0019219;GO:0019222;GO:0019538;GO:…	GO:0005575;GO:0005622;GO:0005623;GO:0005634;GO:0005737;GO:0005829;GO:0043226;GO:0043227;GO:0043229;GO:0043231;GO:0044424;GO:0044444;GO:0044464;	transcription factor	Transcription factor bHLH157
Cla97C10G185850	249	51.8847	16.2378	-1.65118	1.86e-05	0.00010242	Down	NA	NA	NA	NA	NA	NA	Unknown protein
Cla97C10G186110	810	96.609	46.3692	-1.05473	6.64e-05	0.000320987	Down	NA	NA	NA	GO:0000003;GO:0003002;GO:0003006;GO:0007049;GO:0007275;GO:0007389;GO:0008150;GO:0009553;GO:0009554;GO:0009653;GO:0009888;GO:0009933;GO:0009934;GO:0009956;GO:0009987;GO:0010015;GO:0010051;GO:0010305;GO:0019953;GO:0022402;GO:0022414;GO:0022603;GO:0022622;GO:0032501;GO:0032502;GO:0034293;GO:0043934;GO:0044703;GO:0048229;GO:0048236;GO:0048364;GO:0048507;GO:0048509;GO:0048532;GO:0048731;GO:0048856;GO:…	GO:0005575;GO:0005623;GO:0005886;GO:0005911;GO:0009506;GO:0016020;GO:0030054;GO:0044464;GO:0055044;GO:0071944;	Belongs to the tetraspanin (TM4SF) family	protein TORNADO 2-like
Cla97C10G187350	1713	151.112	47.5578	-1.66363	2.83e-13	5.15e-12	Down	K15803 GERD; (-)-germacrene D synthase [EC:4.2.3.75]	ko00909:Sesquiterpenoid and triterpenoid biosynthesis	GO:0003674;GO:0003824;GO:0010333;GO:0010334;GO:0016829;GO:0016835;GO:0016838;	GO:0006629;GO:0006644;GO:0006720;GO:0006721;GO:0006793;GO:0006796;GO:0008150;GO:0008152;GO:0008299;GO:0008610;GO:0009058;GO:0009987;GO:0019637;GO:0042214;GO:0044237;GO:0044238;GO:0044249;GO:0044255;GO:0045338;GO:0046246;GO:0051761;GO:0051762;GO:0071704;GO:1901576;	NA	(-)-germacrene D synthase-like	(-)-germacrene D synthase-like
Cla97C10G187380	723	7192.25	1585.93	-2.18197	0	0	Down	NA	NA	NA	NA	NA	36.4 kDa proline-rich	Bifunctional inhibitor/lipid-transfer protein/seed storage 2S albumin superfamily protein
Cla97C10G187400	381	21.4605	1.34851	-3.96949	1.05e-05	6e-05	Down	NA	NA	NA	NA	NA	14 kDa proline-rich protein	Bifunctional inhibitor/lipid-transfer protein/seed storage 2S albumin superfamily protein
Cla97C10G187410	423	5.76988	0.373456	-3.96234	0.0106908	0.028676	Down	NA	NA	NA	NA	NA	14 kDa proline-rich protein	Bifunctional inhibitor/lipid-transfer protein/seed storage 2S albumin superfamily protein
Cla97C10G188080	3291	22.1147	9.31962	-1.25652	0.0185802	0.0460748	Down	NA	NA	NA	NA	NA	Plant family of unknown function (DUF810)	Protein of unknown function (DUF810)
Cla97C10G188130	1209	11.3059	0.746913	-4.01661	0.00132074	0.00464658	Down	NA	NA	GO:0003674;GO:0003676;GO:0003677;GO:0003700;GO:0005488;GO:0043565;GO:0097159;GO:0140110;GO:1901363;	GO:0001763;GO:0006355;GO:0007275;GO:0008150;GO:0009653;GO:0009888;GO:0009889;GO:0009933;GO:0010014;GO:0010016;GO:0010223;GO:0010346;GO:0010468;GO:0010556;GO:0019219;GO:0019222;GO:0031323;GO:0031326;GO:0032501;GO:0032502;GO:0048367;GO:0048507;GO:0048532;GO:0048646;GO:0048731;GO:0048856;GO:0050789;GO:0050794;GO:0051171;GO:0051252;GO:0060255;GO:0065007;GO:0080090;GO:0090506;GO:1903506;GO:1905393;GO:…	GO:0005575;GO:0005622;GO:0005623;GO:0005634;GO:0043226;GO:0043227;GO:0043229;GO:0043231;GO:0044424;GO:0044464;	Belongs to the GRAS family	scarecrow-like protein 18
Cla97C10G188210	1179	41.0578	7.24435	-2.47329	2.65e-06	1.7e-05	Down	K15803 GERD; (-)-germacrene D synthase [EC:4.2.3.75]	ko00909:Sesquiterpenoid and triterpenoid biosynthesis	NA	NA	NA	(-)-germacrene D synthase-like	(-)-germacrene D synthase-like
Cla97C10G188250	1674	49.2184	3.82756	-3.60922	1.22e-10	1.57e-09	Down	K15803 GERD; (-)-germacrene D synthase [EC:4.2.3.75]	ko00909:Sesquiterpenoid and triterpenoid biosynthesis	GO:0003674;GO:0003824;GO:0010333;GO:0010334;GO:0016829;GO:0016835;GO:0016838;	GO:0006629;GO:0006644;GO:0006720;GO:0006721;GO:0006793;GO:0006796;GO:0008150;GO:0008152;GO:0008299;GO:0008610;GO:0009058;GO:0009987;GO:0019637;GO:0042214;GO:0044237;GO:0044238;GO:0044249;GO:0044255;GO:0045338;GO:0046246;GO:0051761;GO:0051762;GO:0071704;GO:1901576;	NA	(-)-germacrene D synthase-like	(-)-germacrene D synthase-like
Cla97C10G188260	507	31.7997	5.04334	-2.63452	9.94e-06	5.74e-05	Down	NA	NA	GO:0001067;GO:0003674;GO:0003676;GO:0003677;GO:0003700;GO:0005488;GO:0043565;GO:0044212;GO:0097159;GO:0140110;GO:1901363;	GO:0006082;GO:0006355;GO:0006790;GO:0006807;GO:0006950;GO:0006952;GO:0008150;GO:0008152;GO:0009605;GO:0009607;GO:0009620;GO:0009889;GO:0009987;GO:0010468;GO:0010556;GO:0016143;GO:0019219;GO:0019222;GO:0019748;GO:0019757;GO:0019760;GO:0031323;GO:0031326;GO:0043207;GO:0043436;GO:0044237;GO:0044281;GO:0050789;GO:0050794;GO:0050832;GO:0050896;GO:0051171;GO:0051252;GO:0051704;GO:0051707;GO:0060255;GO:…	NA	ethylene-responsive transcription factor	ethylene-responsive transcription factor ERF026-like
Cla97C10G188300	216	75.1159	28.5229	-1.37693	0.000113335	0.000519805	Down	NA	NA	NA	NA	NA	NA	Unknown protein
Cla97C10G188480	2298	22.5557	4.22377	-2.38191	0.00062278	0.00238034	Down	NA	NA	NA	NA	NA	PA domain	subtilisin-like protease SBT5.3
Cla97C10G189060	378	69.312	31.0142	-1.15013	0.000226913	0.000966107	Down	NA	NA	NA	NA	NA	NA	hydroxyproline-rich glycoprotein family protein
Cla97C10G190160	1815	132.119	41.2033	-1.6765	3.21e-12	5.12e-11	Down	K14487 GH3; auxin responsive GH3 gene family	ko04075:Plant hormone signal transduction	GO:0003674;GO:0003824;GO:0010279;GO:0016874;GO:0016879;GO:0016881;	GO:0000902;GO:0006725;GO:0006790;GO:0006807;GO:0007154;GO:0007165;GO:0008150;GO:0008152;GO:0009058;GO:0009314;GO:0009403;GO:0009404;GO:0009416;GO:0009628;GO:0009653;GO:0009700;GO:0009719;GO:0009725;GO:0009733;GO:0009734;GO:0009755;GO:0009826;GO:0009889;GO:0009891;GO:0009893;GO:0009987;GO:0010033;GO:0010120;GO:0010252;GO:0016043;GO:0016049;GO:0018130;GO:0019222;GO:0019438;GO:0019748;GO:0023052;GO:…	GO:0005575;GO:0005622;GO:0005623;GO:0005737;GO:0009507;GO:0009536;GO:0043226;GO:0043227;GO:0043229;GO:0043231;GO:0044424;GO:0044444;GO:0044464;	Indole-3-acetic acid-amido synthetase	Auxin-responsive GH3 family protein
Cla97C10G190300	1050	926.789	417.301	-1.14912	7.02e-41	6.96e-39	Down	NA	NA	NA	NA	NA	flavanone 4-reductase activity	Dihydroflavonol-4-reductase
Cla97C10G190590	909	297.939	134.346	-1.15002	3.96e-15	8.79e-14	Down	NA	NA	GO:0003674;GO:0003700;GO:0140110;	GO:0001101;GO:0006355;GO:0006950;GO:0007154;GO:0007165;GO:0008150;GO:0009414;GO:0009415;GO:0009628;GO:0009719;GO:0009725;GO:0009753;GO:0009755;GO:0009867;GO:0009889;GO:0009987;GO:0010033;GO:0010035;GO:0010468;GO:0010556;GO:0019219;GO:0019222;GO:0023052;GO:0031323;GO:0031326;GO:0032870;GO:0042221;GO:0050789;GO:0050794;GO:0050896;GO:0051171;GO:0051252;GO:0051716;GO:0060255;GO:0065007;GO:0070887;GO:…	NA	NAC domain-containing protein	NAC domain-containing protein
Cla97C10G191100	1860	19.1491	3.22857	-2.60843	0.00042064	0.00168389	Down	NA	NA	NA	GO:0008150;GO:0009605;GO:0009607;GO:0009624;GO:0043207;GO:0050896;GO:0051704;GO:0051707;	GO:0005575;GO:0005623;GO:0005886;GO:0016020;GO:0044464;GO:0071944;	Protein NRT1 PTR FAMILY 4.3-like	protein NRT1/ PTR FAMILY 4.3-like
Cla97C10G191130	393	173.495	75.7699	-1.18449	5.77e-09	5.93e-08	Down	NA	NA	NA	NA	NA	NA	Unknown protein
Cla97C10G191140	858	23.8908	6.94076	-1.7588	0.00175232	0.00596183	Down	NA	NA	NA	NA	NA	NA	SWIM-type domain-containing protein
Cla97C10G191780	795	268.852	94.3212	-1.51332	5.33e-21	1.99e-19	Down	NA	NA	NA	NA	NA	dof zinc finger protein	dof zinc finger protein DOF5.7
Cla97C10G191880	474	26.1186	11.0717	-1.22663	0.0122629	0.0322935	Down	NA	NA	NA	NA	NA	NA	Unknown protein
Cla97C10G192610	162	69.371	33.6186	-1.03502	0.000699098	0.00263349	Down	NA	NA	NA	NA	NA	NA	conserved peptide upstream open reading frame 37
Cla97C10G193300	1191	99.8035	48.8209	-1.02871	1.89e-05	0.000103443	Down	K01184 E3.2.1.15; polygalacturonase [EC:3.2.1.15]	ko00040:Pentose and glucuronate interconversions	NA	NA	NA	Glycosyl hydrolases family 28	Pectin lyase-like superfamily protein
Cla97C10G193350	228	703.716	330.31	-1.09477	1.01e-29	6.55e-28	Down	NA	NA	NA	NA	NA	NA	Unknown protein
Cla97C10G193410	282	12.4203	2.85251	-2.06537	0.015251	0.0389503	Down	NA	NA	NA	NA	NA	NA	Unknown protein
Cla97C10G194640	384	95.7613	21.0832	-2.15845	1.56e-10	1.98e-09	Down	NA	NA	NA	NA	NA	NA	Unknown protein
Cla97C10G195890	867	13.1306	1.504	-3.00207	0.00196924	0.00660875	Down	NA	NA	NA	NA	NA	Carbohydrate esterase	SASA domain-containing protein
Cla97C10G195920	1107	9.90069	1.32855	-2.86802	0.00596852	0.0173767	Down	K22588 ASMT; acetylserotonin O-methyltransferase, plant [EC:2.1.1.4]	ko00380:Tryptophan metabolism	GO:0003674;GO:0003824;GO:0005488;GO:0005515;GO:0008168;GO:0008171;GO:0008757;GO:0016740;GO:0016741;GO:0030766;GO:0033799;GO:0042802;GO:0042803;GO:0046983;	GO:0006725;GO:0006807;GO:0008150;GO:0008152;GO:0009058;GO:0009820;GO:0009821;GO:0009987;GO:0019438;GO:0032259;GO:0034641;GO:0044237;GO:0044249;GO:0044271;GO:0071704;GO:1901564;GO:1901566;GO:1901576;	GO:0005575;GO:0005622;GO:0005623;GO:0005737;GO:0044424;GO:0044464;	Belongs to the class I-like SAM-binding methyltransferase superfamily. Cation-independent O- methyltransferase family	Myricetin O-methyltransferase-like
Cla97C10G196820	261	78.742	28.069	-1.48091	6.35e-07	4.61e-06	Down	NA	NA	NA	NA	NA	NA	Unknown protein
Cla97C10G197720	1311	26.8378	7.65792	-1.76447	0.00373188	0.0115565	Down	K01728 pel; pectate lyase [EC:4.2.2.2]	ko00040:Pentose and glucuronate interconversions	NA	NA	NA	Pectate lyase	Pectate lyase
Cla97C10G198000	696	8.94604	0	-5.55797	0.000143158	0.000641045	Down	K01166 RNASET2; ribonuclease T2 [EC:4.6.1.19]	NA	NA	NA	NA	NA	ribonuclease MC-like
Cla97C10G198020	591	24.0279	6.30922	-1.9045	0.000763695	0.00284558	Down	K01166 RNASET2; ribonuclease T2 [EC:4.6.1.19]	NA	NA	NA	NA	Belongs to the RNase T2 family	Ribonuclease T(2)
Cla97C10G199110	1308	202.618	85.1041	-1.25418	7.14e-13	1.23e-11	Down	K15015 SLC32A, VGAT; solute carrier family 32 (vesicular inhibitory amino acid transporter)	NA	GO:0003674;GO:0005215;GO:0005342;GO:0008509;GO:0008514;GO:0015075;GO:0015171;GO:0015318;GO:0022857;GO:0046943;	GO:0003333;GO:0006810;GO:0006811;GO:0006820;GO:0006865;GO:0008150;GO:0015711;GO:0015849;GO:0034220;GO:0046942;GO:0051179;GO:0051234;GO:0055085;GO:0071702;GO:0071705;GO:0098656;GO:1903825;GO:1905039;	GO:0005575;GO:0005622;GO:0005623;GO:0005737;GO:0005773;GO:0005774;GO:0016020;GO:0031090;GO:0043226;GO:0043227;GO:0043229;GO:0043231;GO:0044422;GO:0044424;GO:0044437;GO:0044444;GO:0044446;GO:0044464;GO:0098588;GO:0098805;	Amino acid transporter	amino acid transporter ANT1-like
Cla97C10G199140	483	9.74258	1.2032	-2.9023	0.009067	0.0249014	Down	NA	NA	NA	NA	NA	NA	Unknown protein
Cla97C10G199270	1179	217.336	80.8972	-1.43571	9.69e-14	1.86e-12	Down	NA	NA	NA	NA	NA	WAT1-related protein	WAT1-related protein
Cla97C10G200220	192	23.6416	9.00624	-1.37503	0.00869697	0.0240211	Down	NA	NA	NA	NA	NA	NA	Unknown protein
Cla97C10G200230	354	25.1695	7.67788	-1.67201	0.00506506	0.0150738	Down	NA	NA	NA	NA	NA	NA	Unknown protein
Cla97C10G200340	228	1128.73	554.083	-1.02365	4.35e-21	1.64e-19	Down	NA	NA	NA	NA	NA	NA	Unknown protein
Cla97C10G200600	186	28.1384	6.0184	-2.2047	4.99e-05	0.000247267	Down	K24726 NDUFAF8; NADH dehydrogenase [ubiquinone] 1 alpha subcomplex assembly factor 8	NA	NA	NA	NA	mitochondrial respiratory chain complex I assembly	Mic1 domain-containing protein
Cla97C10G201320	336	34.0637	6.5673	-2.34505	3.84e-05	0.000195656	Down	NA	NA	NA	NA	NA	NA	Unknown protein
Cla97C10G201410	669	17.1018	6.2691	-1.4561	0.0201853	0.0494254	Down	NA	NA	NA	GO:0002252;GO:0002376;GO:0006950;GO:0006952;GO:0007275;GO:0007568;GO:0008150;GO:0009605;GO:0009607;GO:0009615;GO:0010150;GO:0032501;GO:0032502;GO:0043207;GO:0048366;GO:0048367;GO:0048731;GO:0048827;GO:0048856;GO:0050896;GO:0051607;GO:0051704;GO:0051707;GO:0090693;GO:0098542;GO:0099402;	GO:0005575;GO:0005622;GO:0005623;GO:0005737;GO:0005886;GO:0005911;GO:0009506;GO:0009507;GO:0009536;GO:0016020;GO:0030054;GO:0031224;GO:0031225;GO:0031226;GO:0043226;GO:0043227;GO:0043229;GO:0043231;GO:0044424;GO:0044425;GO:0044444;GO:0044459;GO:0044464;GO:0046658;GO:0055044;GO:0071944;	YLS9-like	Late embryogenesis abundant (LEA) hydroxyproline-rich glycoprotein family
Cla97C10G202850	699	38.6849	14.9544	-1.37894	0.000697666	0.00262907	Down	K01166 RNASET2; ribonuclease T2 [EC:4.6.1.19]	NA	NA	NA	NA	ribonuclease T2 activity	Ribonuclease T(2)
Cla97C10G202860	1128	85.3269	41.246	-1.04513	8.16e-05	0.000385141	Down	NA	NA	GO:0003674;GO:0003824;GO:0004842;GO:0016740;GO:0019787;GO:0140096;	GO:0006464;GO:0006508;GO:0006511;GO:0006807;GO:0008150;GO:0008152;GO:0009056;GO:0009057;GO:0009987;GO:0010498;GO:0016567;GO:0019538;GO:0019941;GO:0030163;GO:0031146;GO:0032446;GO:0036211;GO:0043161;GO:0043170;GO:0043412;GO:0043632;GO:0044237;GO:0044238;GO:0044248;GO:0044257;GO:0044260;GO:0044265;GO:0044267;GO:0051603;GO:0070647;GO:0071704;GO:1901564;GO:1901565;GO:1901575;	NA	f-box protein	F-box protein CPR30-like
Cla97C10G203070	762	986.825	425.124	-1.21706	1.89e-41	1.94e-39	Down	K09873 TIP; aquaporin TIP	NA	GO:0003674;GO:0005215;GO:0005372;GO:0015204;GO:0015250;GO:0015267;GO:0015318;GO:0022803;GO:0022838;GO:0022857;GO:0042887;	GO:0006810;GO:0006811;GO:0006833;GO:0006855;GO:0008150;GO:0015840;GO:0015893;GO:0019755;GO:0034220;GO:0042044;GO:0042221;GO:0042493;GO:0042886;GO:0042891;GO:0050896;GO:0051179;GO:0051181;GO:0051234;GO:0055085;GO:0071702;GO:0071705;GO:0071918;GO:0080170;	GO:0000322;GO:0000325;GO:0000326;GO:0005575;GO:0005622;GO:0005623;GO:0005737;GO:0005773;GO:0005774;GO:0005886;GO:0005887;GO:0009507;GO:0009526;GO:0009536;GO:0009705;GO:0009941;GO:0016020;GO:0016021;GO:0031090;GO:0031224;GO:0031226;GO:0031967;GO:0031975;GO:0042807;GO:0043226;GO:0043227;GO:0043229;GO:0043231;GO:0044422;GO:0044424;GO:0044425;GO:0044434;GO:0044435;GO:0044437;GO:0044444;GO:0044446;GO:…	Belongs to the MIP aquaporin (TC 1.A.8) family	aquaporin TIP1-1-like
Cla97C10G203140	1461	14.504	4.17089	-1.81348	0.0155589	0.0396032	Down	K10532 HGSNAT; heparan-alpha-glucosaminide N-acetyltransferase [EC:2.3.1.78]	ko00531:Glycosaminoglycan degradation	NA	NA	NA	Heparan-alpha-glucosaminide N-acetyltransferase-like	heparan-alpha-glucosaminide N-acetyltransferase-like
Cla97C10G203210	921	49.45	6.29905	-2.99268	4.52e-10	5.39e-09	Down	K09422 MYBP; transcription factor MYB, plant	NA	GO:0000981;GO:0001067;GO:0001134;GO:0001135;GO:0003674;GO:0003676;GO:0003677;GO:0003700;GO:0005488;GO:0043565;GO:0044212;GO:0097159;GO:0140110;GO:1901363;GO:0005515;GO:0008134;	GO:0001101;GO:0006355;GO:0006357;GO:0007154;GO:0007165;GO:0008150;GO:0009314;GO:0009416;GO:0009628;GO:0009637;GO:0009719;GO:0009725;GO:0009737;GO:0009739;GO:0009751;GO:0009753;GO:0009785;GO:0009889;GO:0009987;GO:0010033;GO:0010468;GO:0010556;GO:0014070;GO:0019219;GO:0019222;GO:0023052;GO:0030154;GO:0030522;GO:0031323;GO:0031326;GO:0032502;GO:0033993;GO:0042221;GO:0042493;GO:0046677;GO:0048869;GO:…	GO:0005575;GO:0005622;GO:0005623;GO:0005634;GO:0043226;GO:0043227;GO:0043229;GO:0043231;GO:0044424;GO:0044464;	SANT SWI3, ADA2, N-CoR and TFIIIB'' DNA-binding domains	transcription factor RAX2
Cla97C10G203470	411	25.3282	6.55713	-1.95465	0.000862526	0.00318278	Down	NA	NA	NA	NA	NA	NA	Unknown protein
Cla97C10G203560	1482	31.6123	6.62998	-2.23132	3.95e-05	0.000200532	Down	K25870 IDD3S; zinc finger protein IDD3/4/5/6/7/8/9/10/11/12/13	NA	GO:0003674;GO:0003700;GO:0140110;	GO:0006355;GO:0008150;GO:0009889;GO:0010468;GO:0010556;GO:0019219;GO:0019222;GO:0031323;GO:0031326;GO:0050789;GO:0050794;GO:0051171;GO:0051252;GO:0060255;GO:0065007;GO:0080090;GO:1903506;GO:2000112;GO:2001141;GO:0008152;GO:0006139;GO:0006351;GO:0006725;GO:0006807;GO:0009058;GO:0009059;GO:0009987;GO:0010467;GO:0016070;GO:0018130;GO:0019438;GO:0032774;GO:0034641;GO:0034645;GO:0034654;GO:0043170;GO:…	GO:0005575;GO:0005622;GO:0005623;GO:0005634;GO:0043226;GO:0043227;GO:0043229;GO:0043231;GO:0044424;GO:0044464;	ZINC FINGER protein	C2H2-type domain-containing protein
Cla97C10G204220	969	174.479	67.7234	-1.36903	2.61e-12	4.2e-11	Down	K11153 RDH12; retinol dehydrogenase 12 [EC:1.1.1.300]	NA	NA	NA	NA	Belongs to the short-chain dehydrogenases reductases (SDR) family	short-chain dehydrogenase TIC 32, chloroplastic
Cla97C10G204260	198	50.0835	23.2638	-1.09787	0.00168342	0.00575645	Down	NA	NA	NA	NA	NA	NA	Unknown protein
Cla97C10G204910	189	29.5397	12.9065	-1.17788	0.0170213	0.0427379	Down	NA	NA	NA	NA	NA	NA	Unknown protein
Cla97C10G205470	915	127.862	45.6448	-1.48624	3.22e-10	3.93e-09	Down	NA	NA	GO:0000981;GO:0003674;GO:0003700;GO:0140110;	GO:0006355;GO:0006357;GO:0008150;GO:0009889;GO:0010468;GO:0010556;GO:0019219;GO:0019222;GO:0031323;GO:0031326;GO:0050789;GO:0050794;GO:0051171;GO:0051252;GO:0060255;GO:0065007;GO:0080090;GO:1903506;GO:2000112;GO:2001141;GO:0008152;GO:0006139;GO:0006351;GO:0006725;GO:0006807;GO:0009058;GO:0009059;GO:0009987;GO:0010467;GO:0016070;GO:0018130;GO:0019438;GO:0032774;GO:0034641;GO:0034645;GO:0034654;GO:…	GO:0005575;GO:0005622;GO:0005623;GO:0005634;GO:0005654;GO:0005730;GO:0016592;GO:0031974;GO:0031981;GO:0032991;GO:0043226;GO:0043227;GO:0043228;GO:0043229;GO:0043231;GO:0043232;GO:0043233;GO:0044422;GO:0044424;GO:0044428;GO:0044446;GO:0044451;GO:0044464;GO:0070013;	Trihelix transcription factor	trihelix transcription factor GT-3b
Cla97C10G205570	630	212.864	91.2932	-1.21223	1.6e-11	2.34e-10	Down	K21797 SAC1, SACM1L; phosphatidylinositol 4-phosphatase [EC:3.1.3.-]	ko00562:Inositol phosphate metabolism|ko04070:Phosphatidylinositol signaling system	GO:0003674;GO:0003824;GO:0016787;GO:0016788;GO:0016791;GO:0034596;GO:0042578;GO:0043812;GO:0052744;GO:0052866;	GO:0006629;GO:0006644;GO:0006650;GO:0006793;GO:0006796;GO:0008150;GO:0008152;GO:0009987;GO:0016311;GO:0019637;GO:0030258;GO:0044237;GO:0044238;GO:0044255;GO:0046486;GO:0046488;GO:0046839;GO:0046856;GO:0071704;	GO:0005575;GO:0005622;GO:0005623;GO:0005737;GO:0005783;GO:0005789;GO:0012505;GO:0016020;GO:0031984;GO:0042175;GO:0043226;GO:0043227;GO:0043229;GO:0043231;GO:0044422;GO:0044424;GO:0044425;GO:0044432;GO:0044444;GO:0044446;GO:0044464;GO:0098827;	Phosphoinositide phosphatase	Phosphoinositide phosphatase
Cla97C10G205790	312	19.9302	7.79306	-1.35173	0.0186031	0.0461261	Down	K13141 INTS4; integrator complex subunit 4	NA	NA	NA	NA	NA	Protein SIEL isoform X1
Cla97C11G209280	1560	391.395	95.6451	-2.02289	4.82e-40	4.69e-38	Down	K15639 CYP734A1, BAS1; PHYB activation tagged suppressor 1 [EC:1.14.-.-]	ko00905:Brassinosteroid biosynthesis	GO:0003674;GO:0003824;GO:0004497;GO:0008395;GO:0016491;	GO:0006629;GO:0008150;GO:0008152;GO:0008202;GO:0009719;GO:0009725;GO:0009741;GO:0010033;GO:0010268;GO:0010817;GO:0014070;GO:0016128;GO:0016131;GO:0033993;GO:0042221;GO:0042445;GO:0042592;GO:0044238;GO:0048878;GO:0050896;GO:0055088;GO:0055114;GO:0065007;GO:0065008;GO:0071704;GO:1901360;GO:1901615;GO:1901700;	NA	Cytochrome p450	Cytochrome P450
Cla97C11G209430	543	87.6661	33.5735	-1.39787	8.75e-07	6.14e-06	Down	K13280 SEC11, sipW; signal peptidase I [EC:3.4.21.89]	ko03060:Protein export	NA	NA	NA	Signal peptidase complex catalytic subunit	Signal peptidase I
Cla97C11G209540	735	21.5204	5.17868	-2.06518	0.000757718	0.00282539	Down	NA	NA	GO:0003674;GO:0003700;GO:0140110;	GO:0006355;GO:0008150;GO:0009889;GO:0010468;GO:0010556;GO:0019219;GO:0019222;GO:0031323;GO:0031326;GO:0050789;GO:0050794;GO:0051171;GO:0051252;GO:0060255;GO:0065007;GO:0080090;GO:1903506;GO:2000112;GO:2001141;GO:0008152;GO:0006139;GO:0006351;GO:0006725;GO:0006807;GO:0009058;GO:0009059;GO:0009987;GO:0010467;GO:0016070;GO:0018130;GO:0019438;GO:0032774;GO:0034641;GO:0034645;GO:0034654;GO:0043170;GO:…	NA	Ethylene-responsive transcription factor WIN1-like	Ethylene-responsive transcription factor WIN1-like
Cla97C11G209580	810	35.6363	17.2456	-1.02678	0.0129992	0.0339358	Down	NA	NA	NA	NA	NA	superfamily. Protein	Tetratricopeptide repeat (TPR)-like superfamily protein
Cla97C11G210320	351	21.7848	8.64257	-1.33995	0.0146342	0.0376074	Down	NA	NA	NA	NA	NA	auxin-induced protein	auxin-responsive protein SAUR24-like
Cla97C11G210510	1122	14.8957	3.35132	-2.12992	0.00401975	0.0123366	Down	NA	NA	NA	NA	NA	Pentatricopeptide repeat-containing protein	Pentatricopeptide repeat-containing protein
Cla97C11G210570	192	13.3539	3.57946	-1.86378	0.0168946	0.0424567	Down	NA	NA	NA	NA	NA	NA	Unknown protein
Cla97C11G210940	1800	31.57	11.736	-1.41435	0.00195048	0.00655995	Down	NA	NA	GO:0003674;GO:0005215;GO:0005319;GO:0005548;GO:0008525;GO:0008526;	GO:0000003;GO:0000226;GO:0003006;GO:0006629;GO:0006644;GO:0006650;GO:0006656;GO:0006793;GO:0006796;GO:0006807;GO:0006810;GO:0006811;GO:0006820;GO:0006869;GO:0006996;GO:0007010;GO:0007017;GO:0007049;GO:0007275;GO:0008150;GO:0008152;GO:0008610;GO:0008654;GO:0009058;GO:0009653;GO:0009791;GO:0009908;GO:0009987;GO:0010876;GO:0010927;GO:0015711;GO:0015748;GO:0015914;GO:0016043;GO:0016192;GO:0019637;GO:…	GO:0005575;GO:0005622;GO:0005623;GO:0005628;GO:0005634;GO:0016020;GO:0030427;GO:0032153;GO:0035838;GO:0042763;GO:0042764;GO:0043226;GO:0043227;GO:0043229;GO:0043231;GO:0044424;GO:0044464;GO:0051286;GO:0060187;	Phosphatidylinositol phosphatidylcholine transfer protein	phosphatidylinositol/phosphatidylcholine transfer protein SFH3-like
Cla97C11G211450	210	25.3436	11.0817	-1.17978	0.0159538	0.040434	Down	NA	NA	NA	NA	NA	NA	Unknown protein
Cla97C11G212180	297	35.5693	15.8117	-1.15062	0.0103092	0.0277987	Down	NA	NA	NA	NA	NA	NA	Unknown protein
Cla97C11G212390	1560	108.29	10.4801	-3.35688	1.73e-21	6.8e-20	Down	K10717 CYP735A; cytokinin trans-hydroxylase	ko00908:Zeatin biosynthesis	GO:0003674;GO:0003824;GO:0004497;GO:0016491;	GO:0006725;GO:0006807;GO:0008150;GO:0008152;GO:0009058;GO:0009308;GO:0009690;GO:0009691;GO:0009987;GO:0010817;GO:0018130;GO:0019438;GO:0033397;GO:0033398;GO:0033400;GO:0033466;GO:0034641;GO:0034754;GO:0042445;GO:0042446;GO:0044237;GO:0044249;GO:0044271;GO:0046483;GO:0055114;GO:0065007;GO:0065008;GO:0071704;GO:0072521;GO:0072522;GO:1901360;GO:1901362;GO:1901564;GO:1901566;GO:1901576;	GO:0005575;GO:0005911;GO:0009506;GO:0030054;GO:0055044;	Cytokinin hydroxylase-like	Cytochrome P450
Cla97C11G212890	1740	104.178	49.7187	-1.06608	5.99e-06	3.6e-05	Down	K05909 E1.10.3.2; laccase [EC:1.10.3.2]	NA	GO:0003674;GO:0003824;GO:0016491;GO:0016722;	GO:0008150;GO:0008152;GO:0010035;GO:0010038;GO:0042221;GO:0046688;GO:0050896;GO:0055114;	NA	Lignin degradation and detoxification of lignin-derived products	Laccase
Cla97C11G213780	180	39.9425	16.8093	-1.23435	0.00194613	0.00654748	Down	NA	NA	NA	NA	NA	NA	Unknown protein
Cla97C11G213910	294	26.7483	12.222	-1.12217	0.0190288	0.0470031	Down	NA	NA	NA	NA	NA	NA	Unknown protein
Cla97C11G213940	2055	28.9284	12.0865	-1.26278	0.0122093	0.0321893	Down	NA	NA	GO:0003674;GO:0003824;GO:0004672;GO:0004674;GO:0004675;GO:0004888;GO:0016301;GO:0016740;GO:0016772;GO:0016773;GO:0019199;GO:0038023;GO:0060089;GO:0140096;	GO:0006464;GO:0006468;GO:0006793;GO:0006796;GO:0006807;GO:0007154;GO:0007165;GO:0007166;GO:0007167;GO:0007178;GO:0008150;GO:0008152;GO:0009987;GO:0016310;GO:0019538;GO:0023052;GO:0036211;GO:0043170;GO:0043412;GO:0044237;GO:0044238;GO:0044260;GO:0044267;GO:0050789;GO:0050794;GO:0050896;GO:0051716;GO:0065007;GO:0071704;GO:1901564;	GO:0005575;GO:0005623;GO:0005886;GO:0016020;GO:0044464;GO:0071944;	LysM domain	protein LYK2
Cla97C11G214970	1639	40.0225	18.8321	-1.0762	0.00519358	0.0154064	Down	K10896 FANCM; fanconi anemia group M protein	NA	GO:0003674;GO:0003682;GO:0005488;	GO:0000003;GO:0000280;GO:0000712;GO:0006139;GO:0006259;GO:0006260;GO:0006261;GO:0006281;GO:0006310;GO:0006725;GO:0006807;GO:0006950;GO:0006974;GO:0006996;GO:0007049;GO:0007059;GO:0007127;GO:0007131;GO:0008150;GO:0008152;GO:0009058;GO:0009059;GO:0009987;GO:0016043;GO:0022402;GO:0022414;GO:0031297;GO:0033554;GO:0034641;GO:0034645;GO:0035825;GO:0036297;GO:0043170;GO:0044237;GO:0044238;GO:0044249;GO:…	GO:0005575;GO:0005622;GO:0005623;GO:0005634;GO:0005654;GO:0031974;GO:0031981;GO:0032991;GO:0043226;GO:0043227;GO:0043229;GO:0043231;GO:0043233;GO:0043240;GO:0044422;GO:0044424;GO:0044428;GO:0044446;GO:0044451;GO:0044464;GO:0070013;GO:0071821;	DEAD DEAH box RNA helicase family protein	DEAD-box ATP-dependent RNA helicase FANCM isoform X1
Cla97C11G215160	930	46.8499	21.9251	-1.09678	0.00739015	0.0209344	Down	NA	NA	GO:0000166;GO:0003674;GO:0005488;GO:0036094;GO:0097159;GO:1901265;GO:1901363;	GO:0000302;GO:0001101;GO:0002376;GO:0006950;GO:0006952;GO:0006955;GO:0006979;GO:0007154;GO:0007165;GO:0008150;GO:0009605;GO:0009607;GO:0009617;GO:0009627;GO:0009719;GO:0009725;GO:0009733;GO:0009751;GO:0009814;GO:0009862;GO:0009863;GO:0009987;GO:0010033;GO:0010035;GO:0010193;GO:0014070;GO:0023052;GO:0032870;GO:0035690;GO:0042221;GO:0042493;GO:0042742;GO:0043207;GO:0045087;GO:0046677;GO:0050789;GO:…	GO:0005575;GO:0005622;GO:0005623;GO:0005634;GO:0005737;GO:0005739;GO:0005829;GO:0043226;GO:0043227;GO:0043229;GO:0043231;GO:0044424;GO:0044444;GO:0044464;	host programmed cell death induced by symbiont	Disease resistance protein (TIR-NBS-LRR class) family
Cla97C11G215210	207	23.8908	10.0138	-1.26203	0.0115277	0.0306276	Down	NA	NA	NA	NA	NA	NA	Unknown protein
Cla97C11G215550	204	41.1788	19.5588	-1.07654	0.00430767	0.0130912	Down	NA	NA	NA	NA	NA	NA	Unknown protein
Cla97C11G215700	570	23.7262	7.24156	-1.68349	0.00288302	0.00924613	Down	NA	NA	NA	NA	NA	NA	Unknown protein
Cla97C11G216410	687	31.9564	11.736	-1.43087	0.0014825	0.00514759	Down	NA	NA	NA	NA	NA	Encoded by	Unknown protein
Cla97C11G216610	2465	215.356	78.3567	-1.44372	3.55e-10	4.31e-09	Down	K10779 ATRX; transcriptional regulator ATRX	NA	GO:0003674;GO:0003824;GO:0005488;GO:0005515;GO:0016462;GO:0016787;GO:0016817;GO:0016818;GO:0016887;GO:0017111;GO:0042393;	GO:0000902;GO:0000904;GO:0001932;GO:0006139;GO:0006259;GO:0006323;GO:0006325;GO:0006333;GO:0006334;GO:0006336;GO:0006342;GO:0006355;GO:0006725;GO:0006807;GO:0006915;GO:0006928;GO:0006935;GO:0006996;GO:0007154;GO:0007165;GO:0007275;GO:0007399;GO:0007409;GO:0007411;GO:0008150;GO:0008152;GO:0008219;GO:0008347;GO:0009555;GO:0009605;GO:0009653;GO:0009889;GO:0009890;GO:0009892;GO:0009966;GO:0009987;GO:…	GO:0000775;GO:0000785;GO:0000792;GO:0001674;GO:0005575;GO:0005622;GO:0005623;GO:0005634;GO:0005694;GO:0005700;GO:0005701;GO:0005721;GO:0005722;GO:0010369;GO:0042585;GO:0043073;GO:0043226;GO:0043227;GO:0043228;GO:0043229;GO:0043231;GO:0043232;GO:0044422;GO:0044424;GO:0044427;GO:0044446;GO:0044464;GO:0098687;	Transcriptional regulator	ATP-dependent helicase ATRX
Cla97C11G216780	303	101.723	40.4467	-1.31442	1.11e-06	7.68e-06	Down	NA	NA	NA	NA	NA	NA	Unknown protein
Cla97C11G217620	264	17.7766	2.39622	-2.89335	0.000275981	0.0011522	Down	NA	NA	NA	NA	NA	NA	Unknown protein
Cla97C11G218360	376	31.2991	14.9019	-1.06425	0.0126186	0.0331172	Down	NA	NA	NA	NA	NA	NA	Unknown protein
Cla97C11G218420	558	509.176	164.095	-1.63565	1.38e-42	1.47e-40	Down	NA	NA	GO:0003674;GO:0005488;GO:0048037;GO:0051536;GO:0051540;	NA	NA	Belongs to the Casparian strip membrane proteins (CASP) family	CASP-like protein
Cla97C11G218470	321	117.131	55.4063	-1.07541	5.91e-06	3.56e-05	Down	NA	NA	NA	NA	NA	NA	sequence-specific DNA binding transcription factors;transcription regulators
Cla97C11G218850	204	20.5235	7.28427	-1.47163	0.0137906	0.035713	Down	NA	NA	NA	NA	NA	NA	Unknown protein
Cla97C11G219490	1068	43.0486	20.8073	-1.05222	0.00481378	0.0144278	Down	NA	NA	GO:0003674;GO:0003824;GO:0004672;GO:0004674;GO:0004675;GO:0004888;GO:0016301;GO:0016740;GO:0016772;GO:0016773;GO:0019199;GO:0038023;GO:0060089;GO:0140096;	GO:0002682;GO:0002684;GO:0006464;GO:0006468;GO:0006793;GO:0006796;GO:0006807;GO:0006950;GO:0006952;GO:0007154;GO:0007165;GO:0007166;GO:0007167;GO:0007178;GO:0008150;GO:0008152;GO:0009605;GO:0009607;GO:0009620;GO:0009987;GO:0016310;GO:0019538;GO:0023052;GO:0031347;GO:0031349;GO:0035821;GO:0036211;GO:0043170;GO:0043207;GO:0043412;GO:0044003;GO:0044237;GO:0044238;GO:0044260;GO:0044267;GO:0044403;GO:…	GO:0005575;GO:0005622;GO:0005623;GO:0005634;GO:0005730;GO:0005737;GO:0005886;GO:0016020;GO:0031974;GO:0031981;GO:0043226;GO:0043227;GO:0043228;GO:0043229;GO:0043231;GO:0043232;GO:0043233;GO:0044422;GO:0044424;GO:0044428;GO:0044446;GO:0044464;GO:0070013;GO:0071944;	Protein kinase APK1B, chloroplastic-like	Protein kinase domain-containing protein
Cla97C11G220090	489	57.7056	25.8181	-1.15872	0.000637414	0.00242899	Down	NA	NA	GO:0003674;GO:0003824;GO:0016298;GO:0016787;GO:0016788;GO:0047372;GO:0052689;	GO:0006629;GO:0006638;GO:0006639;GO:0008150;GO:0008152;GO:0009056;GO:0009987;GO:0016042;GO:0044237;GO:0044238;GO:0044242;GO:0044248;GO:0044255;GO:0046461;GO:0046464;GO:0046486;GO:0046503;GO:0071704;GO:1901575;	GO:0005575;GO:0016020;GO:0016021;GO:0031224;GO:0044425;	Monoacylglycerol lipase	Alpha/beta hydrolase-1
Cla97C11G220650	3024	306.259	119.402	-1.36444	1.83e-19	6e-18	Down	NA	NA	GO:0003674;GO:0003824;GO:0004672;GO:0004674;GO:0004712;GO:0016301;GO:0016740;GO:0016772;GO:0016773;GO:0140096;	GO:0001666;GO:0006082;GO:0006464;GO:0006468;GO:0006629;GO:0006720;GO:0006721;GO:0006793;GO:0006796;GO:0006807;GO:0006950;GO:0007154;GO:0007165;GO:0008150;GO:0008152;GO:0008299;GO:0008610;GO:0009058;GO:0009628;GO:0009685;GO:0009686;GO:0009719;GO:0009723;GO:0009725;GO:0009743;GO:0009744;GO:0009746;GO:0009750;GO:0009756;GO:0009966;GO:0009968;GO:0009987;GO:0010033;GO:0010035;GO:0010038;GO:0010039;GO:…	GO:0005575;GO:0005622;GO:0005623;GO:0005737;GO:0005783;GO:0005789;GO:0012505;GO:0016020;GO:0031984;GO:0042175;GO:0043226;GO:0043227;GO:0043229;GO:0043231;GO:0044422;GO:0044424;GO:0044425;GO:0044432;GO:0044444;GO:0044446;GO:0044464;GO:0098827;	Serine threonine-protein kinase	serine/threonine-protein kinase CTR1
Cla97C11G221220	273	45.3303	22.3816	-1.00152	0.00566371	0.0166087	Down	NA	NA	NA	NA	NA	NA	Unknown protein
Cla97C11G222410	354	28.0803	7.09624	-1.94162	0.000471468	0.00186268	Down	NA	NA	NA	NA	NA	NA	Unknown protein
Cla97C11G222780	1095	139.123	67.7282	-1.03652	7.33e-07	5.24e-06	Down	K14709 SLC39A1_2_3, ZIP1_2_3; solute carrier family 39 (zinc transporter), member 1/2/3	NA	GO:0003674;GO:0005215;GO:0005385;GO:0008324;GO:0015075;GO:0015318;GO:0022857;GO:0022890;GO:0046873;GO:0046915;GO:0072509;	GO:0000041;GO:0006810;GO:0006811;GO:0006812;GO:0006829;GO:0008150;GO:0030001;GO:0034220;GO:0051179;GO:0051234;GO:0055085;GO:0070838;GO:0071577;GO:0072511;GO:0098655;GO:0098660;GO:0098662;	GO:0005575;GO:0005623;GO:0005886;GO:0016020;GO:0044464;GO:0071944;	Zinc transporter	zinc transporter 5-like
Cla97C11G223450	1431	638.402	134.792	-2.24044	1.98e-73	5.01e-71	Down	K10956 SEC61A; protein transport protein SEC61 subunit alpha	ko03060:Protein export|ko04141:Protein processing in endoplasmic reticulum|ko04145:Phagosome	GO:0003674;GO:0005215;GO:0008320;GO:0008565;GO:0015399;GO:0015405;GO:0015450;GO:0022804;GO:0022857;GO:0022884;GO:0042887;GO:1904680;	GO:0006605;GO:0006612;GO:0006620;GO:0006810;GO:0006886;GO:0008104;GO:0008150;GO:0015031;GO:0015833;GO:0031204;GO:0033036;GO:0033365;GO:0034613;GO:0042886;GO:0045047;GO:0045184;GO:0046907;GO:0051179;GO:0051234;GO:0051641;GO:0051649;GO:0055085;GO:0065002;GO:0070727;GO:0070972;GO:0071702;GO:0071705;GO:0071806;GO:0072594;GO:0072599;GO:0072657;GO:0090150;	GO:0005575;GO:0005622;GO:0005623;GO:0005737;GO:0005783;GO:0012505;GO:0043226;GO:0043227;GO:0043229;GO:0043231;GO:0044424;GO:0044444;GO:0044464;	Belongs to the SecY SEC61-alpha family	Protein transport protein Sec61 subunit alpha-like
Cla97C11G224140	438	36.964	16.5913	-1.13945	0.00915924	0.0251265	Down	NA	NA	NA	NA	NA	NA	Unknown protein
Cla97C11G224350	516	56.291	26.8658	-1.05882	0.00129193	0.00455869	Down	K05350 bglB; beta-glucosidase [EC:3.2.1.21]	ko00460:Cyanoamino acid metabolism|ko00500:Starch and sucrose metabolism|ko00999:Biosynthesis of various plant secondary metabolites	GO:0003674;GO:0003824;GO:0004553;GO:0008422;GO:0015926;GO:0016787;GO:0016798;	GO:0008150;GO:0008152;GO:0071704;GO:1901135;GO:1901657;	NA	Belongs to the glycosyl hydrolase 1 family	beta-glucosidase 18-like
Cla97C11G225100	1326	180.969	89.295	-1.02368	9.96e-09	9.92e-08	Down	NA	NA	GO:0003674;GO:0003700;GO:0140110;	GO:0006355;GO:0008150;GO:0009653;GO:0009888;GO:0009889;GO:0009933;GO:0010014;GO:0010199;GO:0010468;GO:0010556;GO:0019219;GO:0019222;GO:0031323;GO:0031326;GO:0032502;GO:0048507;GO:0048532;GO:0048646;GO:0048856;GO:0048859;GO:0050789;GO:0050794;GO:0051171;GO:0051252;GO:0060255;GO:0065007;GO:0080090;GO:0090691;GO:1903506;GO:2000112;GO:2001141;GO:0008152;GO:0006139;GO:0006351;GO:0006725;GO:0006807;GO:…	NA	Protein CUP-SHAPED COTYLEDON	NAC domain-containing protein
Cla97C11G225180	195	37.6478	15.7917	-1.2315	0.00524149	0.0155281	Down	NA	NA	NA	NA	NA	NA	Unknown protein
Cla97C00G000340	642	18.0564	40.571	1.16257	0.00705236	0.0200818	Up	NA	NA	NA	NA	NA	GEM-like protein	GRAM domain-containing protein
Cla97C01G000110	684	37.0742	174.374	2.22344	3.17e-21	1.2e-19	Up	K13993 HSP20; HSP20 family protein	ko04141:Protein processing in endoplasmic reticulum	GO:0003674;GO:0005488;GO:0005515;GO:0043621;	GO:0000302;GO:0006355;GO:0006950;GO:0006979;GO:0006996;GO:0008150;GO:0009266;GO:0009314;GO:0009408;GO:0009416;GO:0009628;GO:0009636;GO:0009642;GO:0009644;GO:0009657;GO:0009658;GO:0009889;GO:0009987;GO:0010035;GO:0010468;GO:0010556;GO:0016043;GO:0019219;GO:0019222;GO:0031323;GO:0031326;GO:0042221;GO:0042493;GO:0042542;GO:0046677;GO:0050789;GO:0050794;GO:0050896;GO:0051171;GO:0051252;GO:0060255;GO:…	GO:0005575;GO:0005622;GO:0005623;GO:0005737;GO:0009295;GO:0009507;GO:0009532;GO:0009536;GO:0009570;GO:0032991;GO:0042644;GO:0042646;GO:0043226;GO:0043227;GO:0043228;GO:0043229;GO:0043231;GO:0043232;GO:0044422;GO:0044424;GO:0044434;GO:0044435;GO:0044444;GO:0044446;GO:0044464;GO:0101031;	small heat shock protein	small heat shock protein, chloroplastic
Cla97C01G000840	570	11.9792	32.7158	1.45464	0.00134311	0.00471625	Up	NA	NA	NA	NA	NA	NA	WD repeat-containing protein 91-like protein
Cla97C01G001220	1080	39.0854	90.578	1.22283	9.22e-05	0.00043027	Up	NA	NA	NA	GO:0006950;GO:0008150;GO:0009611;GO:0050896;	NA	receptor-like protein kinase	Protein kinase domain-containing protein
Cla97C01G001460	1179	19.765	51.3305	1.36931	0.000137609	0.000618384	Up	K00001 E1.1.1.1, adh; alcohol dehydrogenase [EC:1.1.1.1]	ko00010:Glycolysis / Gluconeogenesis|ko00071:Fatty acid degradation|ko00350:Tyrosine metabolism|ko00620:Pyruvate metabolism	NA	NA	NA	Alcohol dehydrogenase-like	alcohol dehydrogenase-like 4
Cla97C01G001670	777	169.699	353.323	1.05232	5.44e-13	9.5e-12	Up	K09422 MYBP; transcription factor MYB, plant	NA	NA	NA	NA	SANT SWI3, ADA2, N-CoR and TFIIIB'' DNA-binding domains	MYB transcription factor
Cla97C01G003070	450	419.356	1447.56	1.78566	1.6e-115	6.24e-113	Up	NA	NA	NA	NA	GO:0005575;GO:0005622;GO:0005623;GO:0005737;GO:0044424;GO:0044464;	Elicitor-responsive protein	elicitor-responsive protein 3
Cla97C01G003110	1185	522.616	1247.93	1.25701	1.54e-52	2.3e-50	Up	K09419 HSFF; heat shock transcription factor, other eukaryote	NA	GO:0003674;GO:0003700;GO:0140110;	GO:0006355;GO:0008150;GO:0009889;GO:0009890;GO:0009892;GO:0010033;GO:0010200;GO:0010243;GO:0010468;GO:0010556;GO:0010558;GO:0010605;GO:0010629;GO:0019219;GO:0019222;GO:0031323;GO:0031324;GO:0031326;GO:0031327;GO:0042221;GO:0042493;GO:0045892;GO:0045934;GO:0048519;GO:0048523;GO:0050789;GO:0050794;GO:0050896;GO:0051171;GO:0051172;GO:0051252;GO:0051253;GO:0060255;GO:0065007;GO:0080090;GO:1901698;GO:…	NA	Heat Stress Transcription Factor	heat stress transcription factor B-2b
Cla97C01G003320	906	179.985	469.603	1.38226	3.17e-27	1.78e-25	Up	NA	NA	GO:0003674;GO:0003700;GO:0140110;	GO:0006355;GO:0008150;GO:0008152;GO:0009058;GO:0009888;GO:0009889;GO:0009890;GO:0009892;GO:0009987;GO:0010087;GO:0010089;GO:0010191;GO:0010192;GO:0010468;GO:0010556;GO:0010558;GO:0010605;GO:0010629;GO:0019219;GO:0019222;GO:0031323;GO:0031324;GO:0031326;GO:0031327;GO:0032502;GO:0044087;GO:0044237;GO:0044249;GO:0045892;GO:0045934;GO:0048519;GO:0048523;GO:0048856;GO:0050789;GO:0050794;GO:0051171;GO:…	GO:0005575;GO:0005622;GO:0005623;GO:0005634;GO:0043226;GO:0043227;GO:0043229;GO:0043231;GO:0044424;GO:0044464;	Homeobox protein	homeobox protein knotted-1-like 7
Cla97C01G003730	651	77.2493	155.386	1.00898	2.37e-07	1.85e-06	Up	NA	NA	NA	NA	NA	Protein of unknown function (DUF1442)	Protein of unknown function (DUF1442)
Cla97C01G003790	1593	9.01523	24.7576	1.46471	0.00417041	0.0127256	Up	NA	NA	GO:0003674;GO:0003824;GO:0004497;GO:0016491;GO:0016705;GO:0016709;	GO:0008150;GO:0008152;GO:0009058;GO:0019748;GO:0044550;GO:0055114;	GO:0005575;GO:0016020;	Belongs to the cytochrome P450 family	cytochrome P450, family 706, subfamily A, polypeptide 3
Cla97C01G004000	819	13.6662	39.8642	1.53333	0.000656028	0.00249352	Up	NA	NA	NA	NA	NA	PLATZ transcription factor	B box-type domain-containing protein
Cla97C01G004110	564	20.0824	150.603	2.91636	3.91e-25	1.96e-23	Up	NA	NA	NA	NA	NA	14 kDa proline-rich protein DC2.15-like	14 kDa proline-rich protein DC2.15-like
Cla97C01G004120	771	2826.96	8730.21	1.6269	1.53e-243	2.21e-240	Up	NA	NA	NA	NA	NA	14 kDa proline-rich protein DC2.15-like	Bifunctional inhibitor/lipid-transfer protein/seed storage 2S albumin superfamily protein
Cla97C01G004920	726	146.765	570.729	1.95905	9.13e-52	1.3e-49	Up	K09286 EREBP; EREBP-like factor	NA	GO:0001067;GO:0003674;GO:0003676;GO:0003677;GO:0003700;GO:0005488;GO:0044212;GO:0097159;GO:0140110;GO:1901363;	GO:0006355;GO:0006950;GO:0006952;GO:0008150;GO:0009605;GO:0009607;GO:0009620;GO:0009888;GO:0009889;GO:0009891;GO:0009893;GO:0009987;GO:0010033;GO:0010087;GO:0010200;GO:0010243;GO:0010468;GO:0010556;GO:0010557;GO:0010604;GO:0010628;GO:0019219;GO:0019222;GO:0031323;GO:0031325;GO:0031326;GO:0031328;GO:0032502;GO:0042221;GO:0042493;GO:0043207;GO:0045893;GO:0045935;GO:0048518;GO:0048522;GO:0048856;GO:…	NA	ethylene-responsive transcription factor	ethylene-responsive transcription factor ERF105
Cla97C01G005290	585	11.5768	31.8563	1.46307	0.00141966	0.0049473	Up	K00851 idnK, gntK; gluconokinase [EC:2.7.1.12]	ko00030:Pentose phosphate pathway	GO:0003674;GO:0003824;GO:0016301;GO:0016740;GO:0016772;GO:0016773;GO:0046316;	GO:0005975;GO:0006082;GO:0006793;GO:0006796;GO:0008150;GO:0008152;GO:0009056;GO:0009987;GO:0016052;GO:0016054;GO:0016310;GO:0019520;GO:0019521;GO:0019523;GO:0019752;GO:0032787;GO:0043436;GO:0044237;GO:0044238;GO:0044248;GO:0044262;GO:0044275;GO:0044281;GO:0044282;GO:0046176;GO:0046183;GO:0046395;GO:0071704;GO:0072329;GO:1901575;	NA	Belongs to the gluconokinase GntK GntV family	Gluconokinase
Cla97C01G005560	639	163.584	577.847	1.81898	3.82e-49	5.02e-47	Up	NA	NA	GO:0003674;GO:0003700;GO:0140110;	GO:0000003;GO:0003006;GO:0006355;GO:0007275;GO:0007568;GO:0008150;GO:0009791;GO:0009838;GO:0009889;GO:0009908;GO:0009909;GO:0010150;GO:0010468;GO:0010556;GO:0019219;GO:0019222;GO:0022414;GO:0031323;GO:0031326;GO:0032501;GO:0032502;GO:0048366;GO:0048367;GO:0048437;GO:0048580;GO:0048608;GO:0048731;GO:0048827;GO:0048831;GO:0048856;GO:0050789;GO:0050793;GO:0050794;GO:0051171;GO:0051239;GO:0051252;GO:…	NA	MADS-box protein SOC1-like	MADS-box protein AGL42-like
Cla97C01G006000	261	9.13229	26.0686	1.49592	0.00328603	0.0103548	Up	NA	NA	GO:0003674;GO:0005102;GO:0005488;GO:0005515;GO:0033612;	GO:0007154;GO:0007267;GO:0008150;GO:0009987;GO:0023052;GO:0030154;GO:0032502;GO:0045165;GO:0045168;GO:0048869;	GO:0005575;GO:0005576;GO:0048046;	CLAVATA3 ESR (CLE)-related protein	CLAVATA3/ESR (CLE)-related protein 12-like
Cla97C01G006380	411	20.4077	86.563	2.07077	8.43e-11	1.11e-09	Up	NA	NA	NA	NA	NA	Chaperone protein	Chaperone protein DnaJ isoform X1
Cla97C01G006780	1410	673.775	1488.35	1.14464	1.01e-60	1.96e-58	Up	K14011 UBXN6, UBXD1; UBX domain-containing protein 6	ko04141:Protein processing in endoplasmic reticulum	NA	GO:0006508;GO:0006807;GO:0006810;GO:0006914;GO:0006950;GO:0006952;GO:0007034;GO:0007041;GO:0008150;GO:0008152;GO:0008333;GO:0009056;GO:0009057;GO:0009605;GO:0009607;GO:0009620;GO:0009987;GO:0010033;GO:0010243;GO:0010498;GO:0016192;GO:0016197;GO:0016236;GO:0019538;GO:0030163;GO:0032509;GO:0032510;GO:0033554;GO:0034976;GO:0036503;GO:0042221;GO:0043170;GO:0043207;GO:0044237;GO:0044238;GO:0044248;GO:…	GO:0000323;GO:0005575;GO:0005622;GO:0005623;GO:0005737;GO:0005764;GO:0005765;GO:0005768;GO:0005769;GO:0005770;GO:0005773;GO:0005774;GO:0005829;GO:0010008;GO:0012505;GO:0016020;GO:0019898;GO:0031090;GO:0031410;GO:0031901;GO:0031902;GO:0031982;GO:0032991;GO:0043226;GO:0043227;GO:0043229;GO:0043231;GO:0044422;GO:0044424;GO:0044425;GO:0044433;GO:0044437;GO:0044440;GO:0044444;GO:0044446;GO:0044464;GO:…	UBX domain-containing protein	UBX domain-containing protein
Cla97C01G007100	1002	74.1729	286.956	1.95171	2.47e-31	1.77e-29	Up	K14379 ACP5; tartrate-resistant acid phosphatase type 5 [EC:3.1.3.2]	ko00740:Riboflavin metabolism	GO:0003674;GO:0003824;GO:0003993;GO:0016787;GO:0016788;GO:0016791;GO:0042578;	GO:0006793;GO:0006796;GO:0008150;GO:0008152;GO:0009987;GO:0016311;GO:0044237;	GO:0005575;GO:0005622;GO:0005623;GO:0005737;GO:0005773;GO:0043226;GO:0043227;GO:0043229;GO:0043231;GO:0044424;GO:0044444;GO:0044464;	Purple acid phosphatase	Purple acid phosphatase
Cla97C01G007200	873	94.1145	452.795	2.26164	5.33e-59	9.81e-57	Up	NA	NA	GO:0003674;GO:0005488;GO:0030246;	GO:0008150;GO:0009605;GO:0009607;GO:0009617;GO:0043207;GO:0050896;GO:0051704;GO:0051707;	GO:0005575;GO:0005622;GO:0005623;GO:0005737;GO:0005773;GO:0005774;GO:0016020;GO:0031090;GO:0043226;GO:0043227;GO:0043229;GO:0043231;GO:0044422;GO:0044424;GO:0044437;GO:0044444;GO:0044446;GO:0044464;GO:0098588;GO:0098805;	P-loop nucleoside triphosphate hydrolase superfamily protein	P-loop containing nucleoside triphosphate hydrolases superfamily protein
Cla97C01G007510	1728	789.074	1654.41	1.06726	1.19e-47	1.5e-45	Up	NA	NA	GO:0003674;GO:0003824;GO:0016491;GO:0016679;GO:0016682;GO:0016722;GO:0052716;	GO:0006950;GO:0007154;GO:0008150;GO:0008152;GO:0009267;GO:0009605;GO:0009628;GO:0009888;GO:0009987;GO:0009991;GO:0010073;GO:0016036;GO:0031667;GO:0031668;GO:0031669;GO:0032501;GO:0032502;GO:0033554;GO:0042594;GO:0048507;GO:0048856;GO:0050896;GO:0051716;GO:0055114;GO:0071496;GO:0080167;	GO:0005575;GO:0005618;GO:0005622;GO:0005623;GO:0005737;GO:0005783;GO:0005794;GO:0005829;GO:0012505;GO:0016020;GO:0030312;GO:0043226;GO:0043227;GO:0043229;GO:0043231;GO:0044424;GO:0044444;GO:0044464;GO:0071944;	Belongs to the multicopper oxidase family	multicopper oxidase LPR1-like
Cla97C01G007980	2397	33.8283	73.519	1.12862	0.000157821	0.000699122	Up	NA	NA	NA	NA	NA	Cation H( ) antiporter	cation/H(+) antiporter 4-like
Cla97C01G008040	225	13.1936	31.0066	1.23339	0.00489977	0.0146465	Up	NA	NA	NA	NA	NA	NA	Unknown protein
Cla97C01G008540	203	81.3214	185.818	1.19128	1.89e-10	2.37e-09	Up	NA	NA	NA	NA	NA	NA	Unknown protein
Cla97C01G008570	1344	331.726	672.131	1.01723	8.35e-25	4.11e-23	Up	NA	NA	NA	NA	NA	NA	Pentatricopeptide repeat-containing protein
Cla97C01G008880	519	28.5995	487.584	4.09488	2.32e-102	7.23e-100	Up	NA	NA	GO:0000166;GO:0003674;GO:0005488;GO:0008144;GO:0016208;GO:0017076;GO:0030554;GO:0032553;GO:0032555;GO:0032559;GO:0036094;GO:0043167;GO:0043168;GO:0043169;GO:0097159;GO:0097367;GO:1901265;GO:1901363;	NA	GO:0005575;GO:0005623;GO:0005886;GO:0016020;GO:0044464;GO:0071944;	Universal stress protein A-like protein	Adenine nucleotide alpha hydrolases-like superfamily protein
Cla97C01G008930	1569	14.9278	35.105	1.24418	0.00293873	0.00940244	Up	K07195 EXOC7, EXO70; exocyst complex component 7	NA	NA	NA	NA	exocyst complex component	Exocyst subunit Exo70 family protein
Cla97C01G009190	630	48.3379	124.418	1.36038	3.47e-09	3.7e-08	Up	NA	NA	GO:0003674;GO:0005488;GO:0048037;GO:0051536;GO:0051540;	NA	GO:0005575;GO:0005623;GO:0005886;GO:0016020;GO:0044464;GO:0071944;	Belongs to the Casparian strip membrane proteins (CASP) family	CASP-like protein
Cla97C01G009900	2265	6.46415	22.2914	1.79233	0.00150489	0.00521646	Up	NA	NA	GO:0003674;GO:0003824;GO:0004175;GO:0004252;GO:0008233;GO:0008236;GO:0016787;GO:0017171;GO:0070011;GO:0140096;	GO:0006508;GO:0006807;GO:0007275;GO:0008150;GO:0008152;GO:0019538;GO:0032501;GO:0032502;GO:0042335;GO:0043170;GO:0044238;GO:0048856;GO:0071704;GO:1901564;	NA	Belongs to the peptidase S8 family	Subtilisin-like protease SBT2.4
Cla97C01G012110	732	10.9505	46.0863	2.07365	6.06e-07	4.42e-06	Up	K13343 PEX14; peroxin-14	ko04146:Peroxisome	GO:0003674;GO:0005102;GO:0005215;GO:0005488;GO:0005515;GO:0008565;	GO:0006605;GO:0006625;GO:0006810;GO:0006886;GO:0006996;GO:0007031;GO:0008104;GO:0008150;GO:0009987;GO:0015031;GO:0015833;GO:0015919;GO:0016043;GO:0016558;GO:0016560;GO:0017038;GO:0033036;GO:0033365;GO:0034613;GO:0042886;GO:0043574;GO:0044743;GO:0045184;GO:0046907;GO:0051179;GO:0051234;GO:0051641;GO:0051649;GO:0055085;GO:0065002;GO:0070727;GO:0071702;GO:0071705;GO:0071806;GO:0071840;GO:0072594;GO:…	GO:0005575;GO:0005622;GO:0005623;GO:0005737;GO:0005739;GO:0005777;GO:0005778;GO:0005829;GO:0005886;GO:0016020;GO:0031090;GO:0031903;GO:0032991;GO:0042579;GO:0043226;GO:0043227;GO:0043229;GO:0043231;GO:0044422;GO:0044424;GO:0044438;GO:0044439;GO:0044444;GO:0044446;GO:0044464;GO:0071944;GO:0098588;GO:0098805;GO:1990351;GO:1990415;GO:1990429;	Peroxisomal membrane protein	Peroxin-14
Cla97C01G012800	429	8209.75	16731.7	1.02702	1.55e-136	9.53e-134	Up	K11252 H2B; histone H2B	NA	NA	NA	NA	Core histone H2A/H2B/H3/H4	Histone H2B
Cla97C01G014280	363	3.17124	18.9273	2.566	0.000233026	0.00098815	Up	NA	NA	GO:0002020;GO:0003674;GO:0004857;GO:0004866;GO:0004869;GO:0005488;GO:0005515;GO:0019899;GO:0030234;GO:0030414;GO:0061134;GO:0061135;GO:0098772;	GO:0008150;GO:0009892;GO:0010466;GO:0010605;GO:0010951;GO:0019222;GO:0030162;GO:0031323;GO:0031324;GO:0032268;GO:0032269;GO:0043086;GO:0044092;GO:0045861;GO:0048519;GO:0048523;GO:0050789;GO:0050790;GO:0050794;GO:0051171;GO:0051172;GO:0051246;GO:0051248;GO:0051336;GO:0051346;GO:0052547;GO:0052548;GO:0060255;GO:0065007;GO:0065009;GO:0080090;GO:2000116;GO:2000117;GO:0008152;GO:0006508;GO:0006807;GO:…	NA	Belongs to the cystatin family. Phytocystatin subfamily	cysteine proteinase inhibitor 6-like
Cla97C01G014630	1113	14.2823	44.7783	1.63265	0.000317471	0.00130788	Up	NA	NA	NA	NA	NA	WAT1-related protein At5g64700-like	WAT1-related protein
Cla97C01G015080	1413	38.5848	90.1575	1.22514	1.71e-06	1.14e-05	Up	NA	NA	GO:0003674;GO:0003824;GO:0004497;GO:0016491;GO:0016705;GO:0016713;GO:0080133;	GO:0000038;GO:0006082;GO:0006629;GO:0006631;GO:0006633;GO:0006725;GO:0008150;GO:0008152;GO:0008610;GO:0009058;GO:0009698;GO:0009699;GO:0009987;GO:0010025;GO:0010166;GO:0010345;GO:0016053;GO:0019438;GO:0019748;GO:0019752;GO:0032787;GO:0042761;GO:0043436;GO:0044237;GO:0044238;GO:0044249;GO:0044255;GO:0044281;GO:0044283;GO:0044550;GO:0046394;GO:0055114;GO:0071704;GO:0072330;GO:1901360;GO:1901362;GO:…	GO:0005575;GO:0005622;GO:0005623;GO:0005737;GO:0005783;GO:0012505;GO:0043226;GO:0043227;GO:0043229;GO:0043231;GO:0044424;GO:0044444;GO:0044464;	Belongs to the cytochrome P450 family	alkane hydroxylase MAH1-like
Cla97C01G015160	591	65.6228	160.708	1.2843	7.77e-10	8.9e-09	Up	NA	NA	GO:0003674;GO:0005488;GO:0016168;GO:0043167;GO:0043168;GO:0046906;GO:0048037;GO:0097159;GO:1901363;	GO:0006091;GO:0006950;GO:0008150;GO:0008152;GO:0009314;GO:0009411;GO:0009416;GO:0009611;GO:0009628;GO:0009642;GO:0009644;GO:0009765;GO:0009987;GO:0015979;GO:0019684;GO:0034644;GO:0044237;GO:0050896;GO:0051716;GO:0070141;GO:0071214;GO:0071478;GO:0071482;GO:0071484;GO:0071486;GO:0071492;GO:0104004;	GO:0005575;GO:0005622;GO:0005623;GO:0005737;GO:0009507;GO:0009534;GO:0009535;GO:0009536;GO:0009579;GO:0016020;GO:0031976;GO:0031984;GO:0034357;GO:0042651;GO:0043226;GO:0043227;GO:0043229;GO:0043231;GO:0044422;GO:0044424;GO:0044434;GO:0044435;GO:0044436;GO:0044444;GO:0044446;GO:0044464;GO:0055035;	Stress enhanced protein 2	stress enhanced protein 2, chloroplastic-like
Cla97C01G015850	489	54.6	122.39	1.16005	3.41e-07	2.6e-06	Up	NA	NA	NA	NA	NA	NA	B3 domain-containing protein
Cla97C01G015900	891	88.1627	276.171	1.65176	4.61e-23	2.01e-21	Up	K09419 HSFF; heat shock transcription factor, other eukaryote	NA	GO:0003674;GO:0003700;GO:0140110;	GO:0006355;GO:0006950;GO:0008150;GO:0009266;GO:0009408;GO:0009628;GO:0009889;GO:0009890;GO:0009892;GO:0010468;GO:0010556;GO:0010558;GO:0010605;GO:0010629;GO:0019219;GO:0019222;GO:0031323;GO:0031324;GO:0031326;GO:0031327;GO:0045892;GO:0045934;GO:0048519;GO:0048523;GO:0050789;GO:0050794;GO:0050896;GO:0051171;GO:0051172;GO:0051252;GO:0051253;GO:0060255;GO:0065007;GO:0080090;GO:1902679;GO:1903506;GO:…	GO:0005575;GO:0005622;GO:0005623;GO:0005634;GO:0043226;GO:0043227;GO:0043229;GO:0043231;GO:0044424;GO:0044464;	heat shock factor protein	Heat shock transcription factor
Cla97C01G017840	459	10.7117	23.6798	1.1524	0.0195979	0.0481853	Up	NA	NA	NA	NA	NA	NA	Retrovirus-related Pol polyprotein from transposon TNT 1-94
Cla97C01G018360	1044	18.6231	44.5372	1.27031	0.000892392	0.00328102	Up	K01087 otsB; trehalose 6-phosphate phosphatase [EC:3.1.3.12]	ko00500:Starch and sucrose metabolism	GO:0003674;GO:0003824;GO:0004805;GO:0016787;GO:0016788;GO:0016791;GO:0019203;GO:0042578;	GO:0005975;GO:0005984;GO:0005991;GO:0005992;GO:0006793;GO:0006796;GO:0008150;GO:0008152;GO:0009058;GO:0009311;GO:0009312;GO:0009987;GO:0010035;GO:0010038;GO:0016051;GO:0016311;GO:0022603;GO:0034637;GO:0042221;GO:0044237;GO:0044238;GO:0044249;GO:0044262;GO:0046351;GO:0046686;GO:0048831;GO:0050789;GO:0050793;GO:0050896;GO:0051239;GO:0060688;GO:0065007;GO:0071704;GO:1900618;GO:1901576;GO:1905428;GO:…	GO:0005575;GO:0005576;GO:0005618;GO:0005622;GO:0005623;GO:0005634;GO:0005730;GO:0005737;GO:0005829;GO:0005886;GO:0009507;GO:0009536;GO:0016020;GO:0030312;GO:0031974;GO:0031981;GO:0043226;GO:0043227;GO:0043228;GO:0043229;GO:0043231;GO:0043232;GO:0043233;GO:0044422;GO:0044424;GO:0044428;GO:0044444;GO:0044446;GO:0044464;GO:0070013;GO:0071944;	Removes the phosphate from trehalose 6-phosphate to produce free trehalose	Trehalose 6-phosphate phosphatase
Cla97C01G018480	456	1076.06	2296.54	1.09349	3.55e-70	8.26e-68	Up	NA	NA	GO:0003674;GO:0005488;GO:0043167;GO:0043169;GO:0046872;GO:0046914;	GO:0006810;GO:0006811;GO:0006812;GO:0006873;GO:0006875;GO:0008150;GO:0009987;GO:0019725;GO:0030001;GO:0030003;GO:0042592;GO:0046916;GO:0048878;GO:0050801;GO:0051179;GO:0051234;GO:0055065;GO:0055076;GO:0055080;GO:0055082;GO:0065007;GO:0065008;GO:0098771;	GO:0005575;GO:0005622;GO:0005623;GO:0005737;GO:0044424;GO:0044464;	Heavy metal-associated isoprenylated plant protein	heavy metal-associated isoprenylated plant protein 23
Cla97C01G018520	216	149.759	403.973	1.43048	8.59e-27	4.67e-25	Up	NA	NA	NA	NA	NA	NA	Unknown protein
Cla97C01G018540	252	204.889	454.415	1.15025	1.27e-21	5.02e-20	Up	NA	NA	NA	NA	NA	NA	Unknown protein
Cla97C01G018800	1899	186.868	468.197	1.32972	1.33e-22	5.61e-21	Up	NA	NA	NA	GO:0006950;GO:0006952;GO:0008150;GO:0009605;GO:0009607;GO:0009620;GO:0043207;GO:0050832;GO:0050896;GO:0051704;GO:0051707;GO:0098542;	NA	Cupin	vicilin-like seed storage protein At2g18540
Cla97C01G019190	1086	3.06562	11.9739	1.93276	0.0197418	0.048486	Up	K21483 SAMT; salicylate 1-O-methyltransferase [EC:2.1.1.274]	NA	NA	NA	NA	Salicylate	S-adenosyl-L-methionine-dependent methyltransferases superfamily protein
Cla97C01G019270	1443	29.2036	77.4414	1.40962	7.69e-07	5.47e-06	Up	NA	NA	GO:0003674;GO:0003824;GO:0016462;GO:0016787;GO:0016817;GO:0016818;GO:0016887;GO:0017111;GO:0042623;	GO:0006996;GO:0007005;GO:0008150;GO:0009987;GO:0016043;GO:0017004;GO:0017062;GO:0022607;GO:0033108;GO:0034551;GO:0034622;GO:0043933;GO:0044085;GO:0065003;GO:0071840;	GO:0005575;GO:0005622;GO:0005623;GO:0005737;GO:0005739;GO:0005740;GO:0005743;GO:0016020;GO:0019866;GO:0031090;GO:0031966;GO:0031967;GO:0031975;GO:0043226;GO:0043227;GO:0043229;GO:0043231;GO:0044422;GO:0044424;GO:0044429;GO:0044444;GO:0044446;GO:0044464;	Belongs to the AAA ATPase family	AAA-ATPase
Cla97C01G019360	1002	28.0377	89.6259	1.6714	1.44e-09	1.61e-08	Up	K00430 E1.11.1.7; peroxidase [EC:1.11.1.7]	ko00940:Phenylpropanoid biosynthesis	NA	GO:0006725;GO:0008150;GO:0008152;GO:0009058;GO:0009698;GO:0009699;GO:0009808;GO:0009809;GO:0009987;GO:0019438;GO:0019748;GO:0044237;GO:0044249;GO:0044550;GO:0071704;GO:1901360;GO:1901362;GO:1901576;	GO:0005575;GO:0005618;GO:0005623;GO:0030312;GO:0044464;GO:0071944;	Belongs to the peroxidase family. Classical plant (class III) peroxidase subfamily	Peroxidase
Cla97C01G020890	294	34.9685	70.9972	1.02765	0.000331451	0.00136021	Up	NA	NA	NA	NA	NA	NA	Unknown protein
Cla97C01G021660	264	15.8093	57.0026	1.83732	4.19e-07	3.15e-06	Up	NA	NA	NA	NA	NA	NA	Unknown protein
Cla97C01G021690	339	20.3907	43.1985	1.07599	0.00317689	0.0100485	Up	NA	NA	NA	NA	NA	NA	Unknown protein
Cla97C01G022040	255	1.54331	11.3524	2.84087	0.00294608	0.0094215	Up	NA	NA	GO:0003674;GO:0003824;GO:0004672;GO:0004674;GO:0016301;GO:0016740;GO:0016772;GO:0016773;GO:0140096;	GO:0006464;GO:0006468;GO:0006793;GO:0006796;GO:0006807;GO:0006950;GO:0006952;GO:0008150;GO:0008152;GO:0009605;GO:0009607;GO:0009617;GO:0009987;GO:0016310;GO:0019538;GO:0036211;GO:0042742;GO:0043170;GO:0043207;GO:0043412;GO:0044237;GO:0044238;GO:0044260;GO:0044267;GO:0050896;GO:0051704;GO:0051707;GO:0071704;GO:0098542;GO:1901564;	GO:0005575;GO:0005623;GO:0005886;GO:0016020;GO:0044464;GO:0071944;	Cysteine-rich receptor-like protein kinase	cysteine-rich receptor-like protein kinase 10
Cla97C01G022050	546	4.11538	13.1671	1.67405	0.020002	0.049042	Up	NA	NA	GO:0003674;GO:0003824;GO:0004672;GO:0004674;GO:0016301;GO:0016740;GO:0016772;GO:0016773;GO:0140096;	GO:0001101;GO:0006464;GO:0006468;GO:0006793;GO:0006796;GO:0006807;GO:0008150;GO:0008152;GO:0009719;GO:0009725;GO:0009737;GO:0009987;GO:0010033;GO:0016310;GO:0019538;GO:0033993;GO:0036211;GO:0042221;GO:0043170;GO:0043412;GO:0044237;GO:0044238;GO:0044260;GO:0044267;GO:0050896;GO:0071704;GO:0097305;GO:1901564;GO:1901700;	GO:0005575;GO:0005622;GO:0005623;GO:0005737;GO:0005773;GO:0005886;GO:0016020;GO:0043226;GO:0043227;GO:0043229;GO:0043231;GO:0044424;GO:0044444;GO:0044464;GO:0071944;	Cysteine-rich receptor-like protein kinase	cysteine-rich receptor-like protein kinase 29
Cla97C01G022250	378	234.142	626.34	1.41846	2.32e-35	1.92e-33	Up	NA	NA	GO:0003674;GO:0003700;GO:0140110;	GO:0006355;GO:0008150;GO:0009889;GO:0010468;GO:0010556;GO:0019219;GO:0019222;GO:0031323;GO:0031326;GO:0050789;GO:0050794;GO:0051171;GO:0051252;GO:0060255;GO:0065007;GO:0080090;GO:1903506;GO:2000112;GO:2001141;GO:0008152;GO:0006139;GO:0006351;GO:0006725;GO:0006807;GO:0009058;GO:0009059;GO:0009987;GO:0010467;GO:0016070;GO:0018130;GO:0019438;GO:0032774;GO:0034641;GO:0034645;GO:0034654;GO:0043170;GO:…	NA	Zinc finger protein	B-box type zinc finger family protein
Cla97C01G022460	156	86.3501	243.337	1.49569	1.21e-16	3.09e-15	Up	NA	NA	NA	NA	NA	NA	Unknown protein
Cla97C01G023110	435	47.2931	96.7899	1.02804	2.24e-05	0.000120564	Up	NA	NA	NA	NA	NA	NA	Unknown protein
Cla97C01G023520	1176	186.8	470.592	1.33257	1.95e-30	1.32e-28	Up	NA	NA	NA	NA	GO:0005575;GO:0005618;GO:0005622;GO:0005623;GO:0005737;GO:0005773;GO:0030312;GO:0043226;GO:0043227;GO:0043229;GO:0043231;GO:0044424;GO:0044444;GO:0044464;GO:0071944;	Belongs to the 'GDSL' lipolytic enzyme family	GDSL esterase/lipase
Cla97C01G025530	579	32.7683	68.4052	1.05788	0.000230548	0.000979903	Up	NA	NA	NA	NA	NA	Protein of unknown function (DUF640)	protein LIGHT-DEPENDENT SHORT HYPOCOTYLS 4-like
Cla97C01G025800	381	74.2961	156.903	1.07649	1.5e-08	1.45e-07	Up	NA	NA	NA	NA	NA	NA	Unknown protein
Cla97C01G025830	1395	223.578	496.134	1.14981	2.93e-23	1.31e-21	Up	NA	NA	NA	GO:0000003;GO:0000271;GO:0003006;GO:0005975;GO:0005976;GO:0005982;GO:0006073;GO:0007275;GO:0008150;GO:0008152;GO:0009058;GO:0009059;GO:0009250;GO:0009791;GO:0009987;GO:0010154;GO:0010941;GO:0010942;GO:0016051;GO:0019252;GO:0022414;GO:0032501;GO:0032502;GO:0033692;GO:0034637;GO:0034645;GO:0043067;GO:0043068;GO:0043170;GO:0044042;GO:0044237;GO:0044238;GO:0044249;GO:0044260;GO:0044262;GO:0044264;GO:…	GO:0005575;GO:0005622;GO:0005623;GO:0005634;GO:0043226;GO:0043227;GO:0043229;GO:0043231;GO:0044424;GO:0044464;	MADS-box protein	MADS-box protein FBP24
Cla97C02G026280	957	170.655	388.939	1.1862	3.35e-20	1.16e-18	Up	NA	NA	GO:0001067;GO:0003674;GO:0003676;GO:0003677;GO:0003700;GO:0005488;GO:0043565;GO:0044212;GO:0097159;GO:0140110;GO:1901363;	GO:0001666;GO:0006082;GO:0006355;GO:0006790;GO:0006807;GO:0006950;GO:0008150;GO:0008152;GO:0009611;GO:0009628;GO:0009787;GO:0009788;GO:0009889;GO:0009966;GO:0009968;GO:0009987;GO:0010468;GO:0010556;GO:0010646;GO:0010648;GO:0016143;GO:0019219;GO:0019222;GO:0019748;GO:0019757;GO:0019760;GO:0023051;GO:0023057;GO:0031323;GO:0031326;GO:0036293;GO:0043436;GO:0044237;GO:0044281;GO:0048519;GO:0048523;GO:…	GO:0005575;GO:0005622;GO:0005623;GO:0005737;GO:0009507;GO:0009536;GO:0043226;GO:0043227;GO:0043229;GO:0043231;GO:0044424;GO:0044444;GO:0044464;	NAC domain-containing protein	NAC domain-containing protein
Cla97C02G026730	639	21.997	74.4632	1.75332	3.94e-08	3.53e-07	Up	K09422 MYBP; transcription factor MYB, plant	NA	GO:0000981;GO:0001067;GO:0001134;GO:0001135;GO:0003674;GO:0003676;GO:0003677;GO:0003700;GO:0005488;GO:0043565;GO:0044212;GO:0097159;GO:0140110;GO:1901363;GO:0005515;GO:0008134;	GO:0001101;GO:0006355;GO:0006357;GO:0006950;GO:0006952;GO:0006970;GO:0008150;GO:0009414;GO:0009415;GO:0009605;GO:0009607;GO:0009617;GO:0009620;GO:0009628;GO:0009651;GO:0009719;GO:0009723;GO:0009725;GO:0009733;GO:0009737;GO:0009739;GO:0009751;GO:0009753;GO:0009889;GO:0009966;GO:0009967;GO:0009987;GO:0010033;GO:0010035;GO:0010038;GO:0010200;GO:0010243;GO:0010468;GO:0010556;GO:0010646;GO:0010647;GO:…	GO:0005575;GO:0005622;GO:0005623;GO:0005634;GO:0043226;GO:0043227;GO:0043229;GO:0043231;GO:0044424;GO:0044464;	Myb-like DNA-binding domain	MYB transcription factor
Cla97C02G027030	1107	21.8064	61.4543	1.49263	4.76e-06	2.92e-05	Up	NA	NA	GO:0003674;GO:0005215;GO:0022857;	GO:0006810;GO:0007154;GO:0007165;GO:0008150;GO:0009719;GO:0009725;GO:0009733;GO:0009734;GO:0009755;GO:0009987;GO:0010033;GO:0023052;GO:0032870;GO:0042221;GO:0050789;GO:0050794;GO:0050896;GO:0051179;GO:0051234;GO:0051716;GO:0055085;GO:0065007;GO:0070887;GO:0071310;GO:0071365;GO:0071495;	GO:0005575;GO:0005622;GO:0005623;GO:0005737;GO:0005886;GO:0005887;GO:0005938;GO:0016020;GO:0016021;GO:0031224;GO:0031226;GO:0044424;GO:0044425;GO:0044444;GO:0044459;GO:0044464;GO:0071944;GO:0099568;	Auxin-induced protein	WAT1-related protein
Cla97C02G027100	1776	69.3802	194.708	1.48698	4.51e-16	1.09e-14	Up	NA	NA	GO:0003674;GO:0003824;GO:0009975;GO:0010333;GO:0010334;GO:0016829;GO:0016835;GO:0016838;GO:0034002;GO:0034768;GO:0050550;GO:0050551;GO:0050552;GO:0052578;GO:0080015;	GO:0001101;GO:0006629;GO:0006714;GO:0006720;GO:0006721;GO:0006950;GO:0008150;GO:0008152;GO:0008299;GO:0008610;GO:0009058;GO:0009605;GO:0009607;GO:0009611;GO:0009625;GO:0009719;GO:0009725;GO:0009753;GO:0009987;GO:0010033;GO:0016098;GO:0016099;GO:0016106;GO:0016114;GO:0042214;GO:0042221;GO:0043207;GO:0043692;GO:0043693;GO:0044237;GO:0044238;GO:0044249;GO:0044255;GO:0046246;GO:0050896;GO:0051704;GO:…	GO:0005575;GO:0005622;GO:0005623;GO:0005737;GO:0005829;GO:0009507;GO:0009532;GO:0009536;GO:0009570;GO:0043226;GO:0043227;GO:0043229;GO:0043231;GO:0044422;GO:0044424;GO:0044434;GO:0044435;GO:0044444;GO:0044446;GO:0044464;	synthase	terpene synthase 10-like
Cla97C02G027120	1773	143.023	412.026	1.52655	5.63e-28	3.29e-26	Up	NA	NA	GO:0003674;GO:0003824;GO:0009975;GO:0010333;GO:0010334;GO:0016829;GO:0016835;GO:0016838;GO:0034002;GO:0034768;GO:0050550;GO:0050551;GO:0050552;GO:0052578;GO:0080015;	GO:0001101;GO:0006629;GO:0006714;GO:0006720;GO:0006721;GO:0006950;GO:0008150;GO:0008152;GO:0008299;GO:0008610;GO:0009058;GO:0009605;GO:0009607;GO:0009611;GO:0009625;GO:0009719;GO:0009725;GO:0009753;GO:0009987;GO:0010033;GO:0016098;GO:0016099;GO:0016106;GO:0016114;GO:0042214;GO:0042221;GO:0043207;GO:0043692;GO:0043693;GO:0044237;GO:0044238;GO:0044249;GO:0044255;GO:0046246;GO:0050896;GO:0051704;GO:…	GO:0005575;GO:0005622;GO:0005623;GO:0005737;GO:0005829;GO:0009507;GO:0009532;GO:0009536;GO:0009570;GO:0043226;GO:0043227;GO:0043229;GO:0043231;GO:0044422;GO:0044424;GO:0044434;GO:0044435;GO:0044444;GO:0044446;GO:0044464;	synthase	terpene synthase 10-like
Cla97C02G027210	1797	19.9938	41.0506	1.03304	0.00854773	0.0236638	Up	NA	NA	GO:0003674;GO:0003824;GO:0009975;GO:0010333;GO:0010334;GO:0016829;GO:0016835;GO:0016838;GO:0034002;GO:0034768;GO:0050550;GO:0050551;GO:0050552;GO:0052578;GO:0080015;	GO:0001101;GO:0006629;GO:0006714;GO:0006720;GO:0006721;GO:0006950;GO:0008150;GO:0008152;GO:0008299;GO:0008610;GO:0009058;GO:0009605;GO:0009607;GO:0009611;GO:0009625;GO:0009719;GO:0009725;GO:0009753;GO:0009987;GO:0010033;GO:0016098;GO:0016099;GO:0016106;GO:0016114;GO:0042214;GO:0042221;GO:0043207;GO:0043692;GO:0043693;GO:0044237;GO:0044238;GO:0044249;GO:0044255;GO:0046246;GO:0050896;GO:0051704;GO:…	GO:0005575;GO:0005622;GO:0005623;GO:0005737;GO:0005829;GO:0009507;GO:0009532;GO:0009536;GO:0009570;GO:0043226;GO:0043227;GO:0043229;GO:0043231;GO:0044422;GO:0044424;GO:0044434;GO:0044435;GO:0044444;GO:0044446;GO:0044464;	synthase	Terpene synthase 10-like
Cla97C02G027760	258	23.4708	57.4187	1.28937	9.04e-05	0.000422148	Up	NA	NA	NA	NA	NA	Wound-induced protein	Wound-responsive family protein
Cla97C02G028150	402	11.6132	29.0866	1.32963	0.003812	0.0117758	Up	NA	NA	NA	NA	NA	B-Box-type zinc finger	B box-type domain-containing protein
Cla97C02G028340	195	31.0388	79.7145	1.35712	1.55e-06	1.04e-05	Up	NA	NA	NA	NA	NA	NA	Unknown protein
Cla97C02G028720	744	170.855	378.56	1.14735	6.95e-19	2.2e-17	Up	NA	NA	NA	NA	GO:0005575;GO:0005618;GO:0005622;GO:0005623;GO:0005737;GO:0005794;GO:0005886;GO:0005911;GO:0009505;GO:0009506;GO:0012505;GO:0016020;GO:0030054;GO:0030312;GO:0031224;GO:0031225;GO:0031226;GO:0043226;GO:0043227;GO:0043229;GO:0043231;GO:0044424;GO:0044425;GO:0044444;GO:0044459;GO:0044464;GO:0046658;GO:0055044;GO:0071944;	Fasciclin-like arabinogalactan protein	fasciclin-like arabinogalactan protein 6
Cla97C02G030290	855	0.312861	9.83579	4.8357	0.000708214	0.00266485	Up	NA	NA	NA	NA	NA	Arabidopsis protein of unknown function	Arabidopsis protein of unknown function (DUF241)
Cla97C02G030910	465	621.67	1852.4	1.57257	3.68e-80	9.67e-78	Up	NA	NA	GO:0003674;GO:0005488;GO:0043167;GO:0043169;GO:0046872;GO:0046914;	GO:0006810;GO:0006811;GO:0006812;GO:0006873;GO:0006875;GO:0008150;GO:0009987;GO:0019725;GO:0030001;GO:0030003;GO:0042592;GO:0046916;GO:0048878;GO:0050801;GO:0051179;GO:0051234;GO:0055065;GO:0055076;GO:0055080;GO:0055082;GO:0065007;GO:0065008;GO:0098771;	GO:0005575;GO:0005622;GO:0005623;GO:0005737;GO:0005911;GO:0009506;GO:0030054;GO:0044424;GO:0044464;GO:0055044;	Heavy metal-associated isoprenylated plant protein	heavy metal-associated isoprenylated plant protein 26-like
Cla97C02G031600	540	12.8542	28.9285	1.17437	0.0108164	0.028985	Up	K09755 CYP84A, F5H; ferulate-5-hydroxylase [EC:1.14.-.-]	ko00940:Phenylpropanoid biosynthesis	NA	NA	NA	Cytochrome p450	cytochrome P450 84A1-like
Cla97C02G031640	816	69.6279	204.724	1.55436	3.39e-16	8.25e-15	Up	NA	NA	NA	NA	NA	B-box zinc finger protein 20-like	B-box zinc finger family protein
Cla97C02G031810	927	118.403	273.909	1.20417	2.48e-14	5.09e-13	Up	K23050 PCBER1; phenylcoumaran benzylic ether reductase [EC:1.3.1.-]	NA	NA	NA	NA	isoflavone	isoflavone reductase-like protein
Cla97C02G032060	918	32.4811	591.912	4.19107	1.65e-121	7.11e-119	Up	NA	NA	NA	NA	NA	NA	organ-specific protein S2-like isoform X2
Cla97C02G032080	774	13697.6	27562.8	1.00874	1.73e-213	2.19e-210	Up	NA	NA	NA	NA	NA	NA	organ-specific protein S2-like isoform X2
Cla97C02G032460	408	22.6653	49.6758	1.12685	0.000928669	0.00339896	Up	NA	NA	NA	NA	NA	NA	Unknown protein
Cla97C02G032860	528	205.012	443.876	1.11455	8.08e-21	2.98e-19	Up	K13448 CML; calcium-binding protein CML	ko04626:Plant-pathogen interaction	GO:0003674;GO:0005488;GO:0005509;GO:0043167;GO:0043169;GO:0046872;	NA	GO:0005575;GO:0005622;GO:0005623;GO:0005737;GO:0005739;GO:0043226;GO:0043227;GO:0043229;GO:0043231;GO:0044424;GO:0044444;GO:0044464;	EF-hand domain	calmodulin-like protein 1
Cla97C02G033210	2064	6.9367	19.0724	1.43832	0.0181002	0.0450834	Up	NA	NA	NA	NA	NA	Encoded by	Proline-rich protein 36-like
Cla97C02G033340	1431	569.156	1904.37	1.74171	3.29e-144	2.15e-141	Up	NA	NA	NA	NA	NA	Belongs to the UDP-glycosyltransferase family	Glycosyltransferase
Cla97C02G033390	633	3.05512	68.3496	4.42587	2.22e-15	5.05e-14	Up	K13993 HSP20; HSP20 family protein	ko04141:Protein processing in endoplasmic reticulum	NA	GO:0006950;GO:0008150;GO:0009266;GO:0009408;GO:0009628;GO:0050896;	NA	Belongs to the small heat shock protein (HSP20) family	Heat-shock protein
Cla97C02G034340	432	25.2034	63.6651	1.3462	0.00010287	0.000476233	Up	NA	NA	NA	NA	NA	disease resistance protein	Fom-2 protein
Cla97C02G034820	249	11.4916	44.7005	1.95124	8.06e-06	4.73e-05	Up	NA	NA	NA	NA	NA	NA	Unknown protein
Cla97C02G035200	405	25.4712	51.586	1.01258	0.00199545	0.00668894	Up	NA	NA	GO:0003674;GO:0003676;GO:0003677;GO:0003682;GO:0003700;GO:0005198;GO:0005488;GO:0030527;GO:0097159;GO:0140110;GO:1901363;	GO:0006325;GO:0006333;GO:0006355;GO:0006996;GO:0008150;GO:0009889;GO:0009987;GO:0010468;GO:0010556;GO:0016043;GO:0019219;GO:0019222;GO:0031323;GO:0031326;GO:0050789;GO:0050794;GO:0051171;GO:0051252;GO:0051276;GO:0060255;GO:0065007;GO:0071840;GO:0080090;GO:1903506;GO:2000112;GO:2001141;GO:0008152;GO:0006139;GO:0006351;GO:0006725;GO:0006807;GO:0009058;GO:0009059;GO:0010467;GO:0016070;GO:0018130;GO:…	GO:0000785;GO:0005575;GO:0005622;GO:0005623;GO:0005634;GO:0005694;GO:0043226;GO:0043227;GO:0043228;GO:0043229;GO:0043231;GO:0043232;GO:0044422;GO:0044424;GO:0044427;GO:0044446;GO:0044464;	high mobility group	high mobility group B protein 3-like
Cla97C02G036510	708	87.6754	207.403	1.23698	2.24e-11	3.2e-10	Up	NA	NA	GO:0003674;GO:0005215;GO:0015291;GO:0015297;GO:0022804;GO:0022857;	GO:0006810;GO:0008150;GO:0015780;GO:0015931;GO:0051179;GO:0051234;GO:0055085;GO:0071702;GO:0071705;GO:0090480;GO:1901264;	GO:0005575;GO:0005622;GO:0005623;GO:0005737;GO:0005794;GO:0012505;GO:0043226;GO:0043227;GO:0043229;GO:0043231;GO:0044424;GO:0044444;GO:0044464;	UDP-galactose transporter 2-like	UDP-galactose transporter 2-like
Cla97C02G037900	465	30.9161	85.3831	1.47384	3.91e-07	2.96e-06	Up	K09286 EREBP; EREBP-like factor	NA	GO:0003674;GO:0003700;GO:0140110;	GO:0006355;GO:0008150;GO:0009889;GO:0010468;GO:0010556;GO:0019219;GO:0019222;GO:0031323;GO:0031326;GO:0050789;GO:0050794;GO:0051171;GO:0051252;GO:0060255;GO:0065007;GO:0080090;GO:1903506;GO:2000112;GO:2001141;GO:0008152;GO:0006139;GO:0006351;GO:0006725;GO:0006807;GO:0009058;GO:0009059;GO:0009987;GO:0010467;GO:0016070;GO:0018130;GO:0019438;GO:0032774;GO:0034641;GO:0034645;GO:0034654;GO:0043170;GO:…	NA	ethylene-responsive transcription factor	ethylene-responsive transcription factor ERF008
Cla97C02G038410	609	31.104	181.495	2.53473	9.87e-27	5.32e-25	Up	NA	NA	GO:0003674;GO:0003676;GO:0003677;GO:0003700;GO:0005488;GO:0043565;GO:0097159;GO:0140110;GO:1901363;	GO:0000003;GO:0003006;GO:0006355;GO:0007275;GO:0008150;GO:0009653;GO:0009791;GO:0009889;GO:0009891;GO:0009893;GO:0009908;GO:0010468;GO:0010500;GO:0010556;GO:0010557;GO:0010604;GO:0010628;GO:0019219;GO:0019222;GO:0022414;GO:0031323;GO:0031325;GO:0031326;GO:0031328;GO:0032501;GO:0032502;GO:0035670;GO:0045893;GO:0045935;GO:0048367;GO:0048437;GO:0048438;GO:0048440;GO:0048444;GO:0048445;GO:0048449;GO:…	NA	transcription factor	BHLH domain-containing protein
Cla97C02G038580	474	535.34	1527.3	1.51182	7.45e-84	2.07e-81	Up	NA	NA	NA	NA	NA	Domain of unknown function (DUF4228)	HTH-type transcriptional regulator protein ptxE
Cla97C02G039810	1398	100.29	244.882	1.28962	1.17e-15	2.74e-14	Up	NA	NA	NA	NA	GO:0005575;GO:0005622;GO:0005623;GO:0005737;GO:0009507;GO:0009536;GO:0043226;GO:0043227;GO:0043229;GO:0043231;GO:0044424;GO:0044444;GO:0044464;	4Fe-4S single cluster domain of Ferredoxin I	J domain-containing protein
Cla97C02G039950	681	78.9934	164.748	1.06193	1.93e-07	1.54e-06	Up	NA	NA	NA	NA	NA	GEM-like protein	GEM-like protein 4
Cla97C02G041810	1134	13.4855	29.0465	1.10461	0.0122165	0.0322039	Up	NA	NA	NA	NA	NA	Belongs to the 'GDSL' lipolytic enzyme family	GDSL esterase/lipase
Cla97C02G044000	267	4.12588	14.2875	1.78695	0.0112382	0.0300042	Up	NA	NA	NA	NA	NA	NA	Unknown protein
Cla97C02G044440	792	28.3503	57.6473	1.02892	0.00159882	0.00550249	Up	NA	NA	GO:0003674;GO:0003700;GO:0140110;	GO:0000003;GO:0003006;GO:0006355;GO:0007154;GO:0007165;GO:0007275;GO:0008150;GO:0009314;GO:0009416;GO:0009628;GO:0009639;GO:0009791;GO:0009889;GO:0009908;GO:0009909;GO:0009987;GO:0010017;GO:0010018;GO:0010218;GO:0010468;GO:0010556;GO:0019219;GO:0019222;GO:0022414;GO:0023052;GO:0031323;GO:0031326;GO:0032501;GO:0032502;GO:0048367;GO:0048580;GO:0048608;GO:0048731;GO:0048831;GO:0048856;GO:0050789;GO:…	GO:0005575;GO:0005622;GO:0005623;GO:0005634;GO:0043226;GO:0043227;GO:0043229;GO:0043231;GO:0044424;GO:0044464;	ZINC FINGER protein	CCT domain-containing protein
Cla97C02G045020	732	21.1856	65.2915	1.62037	8.43e-07	5.94e-06	Up	NA	NA	NA	GO:0006355;GO:0008150;GO:0009889;GO:0009890;GO:0009892;GO:0010468;GO:0010556;GO:0010558;GO:0010605;GO:0010629;GO:0019219;GO:0019222;GO:0031323;GO:0031324;GO:0031326;GO:0031327;GO:0045892;GO:0045934;GO:0048519;GO:0048523;GO:0050789;GO:0050794;GO:0051171;GO:0051172;GO:0051252;GO:0051253;GO:0060255;GO:0065007;GO:0080090;GO:1902679;GO:1903506;GO:1903507;GO:2000112;GO:2000113;GO:2001141;GO:0008152;GO:…	NA	transcription repressor	transcription repressor OFP17
Cla97C02G045070	981	20.7236	53.3177	1.36665	8.31e-05	0.000391933	Up	K00430 E1.11.1.7; peroxidase [EC:1.11.1.7]	ko00940:Phenylpropanoid biosynthesis	NA	NA	NA	Belongs to the peroxidase family. Classical plant (class III) peroxidase subfamily	Peroxidase
Cla97C02G045390	1239	127.019	278.089	1.13088	9.88e-15	2.13e-13	Up	NA	NA	NA	NA	NA	N-acetyltransferase	N-acetyltransferase domain-containing protein
Cla97C02G045410	699	8.02353	24.0531	1.57884	0.00300395	0.00957782	Up	NA	NA	NA	GO:0000003;GO:0003006;GO:0006950;GO:0006970;GO:0007275;GO:0008150;GO:0009266;GO:0009409;GO:0009628;GO:0009651;GO:0009791;GO:0010228;GO:0022414;GO:0032501;GO:0032502;GO:0048608;GO:0048731;GO:0048856;GO:0050896;GO:0061458;	GO:0005575;GO:0005622;GO:0005623;GO:0005737;GO:0005829;GO:0044424;GO:0044444;GO:0044464;	BAG family molecular chaperone regulator	BZIP domain-containing protein
Cla97C02G049610	2409	10.4159	25.9507	1.3082	0.00841239	0.0233594	Up	NA	NA	NA	NA	NA	G-type lectin S-receptor-like serine threonine-protein kinase	Receptor-like serine/threonine-protein kinase
Cla97C02G049670	639	5.17565	21.2632	2.03536	0.00115734	0.00412841	Up	K00454 LOX2S; lipoxygenase [EC:1.13.11.12]	ko00591:Linoleic acid metabolism|ko00592:alpha-Linolenic acid metabolism	GO:0003674;GO:0003824;GO:0016165;GO:0016491;GO:0016701;GO:0016702;GO:0051213;	GO:0006082;GO:0006629;GO:0006631;GO:0006690;GO:0008150;GO:0008152;GO:0009987;GO:0010597;GO:0019372;GO:0019752;GO:0032787;GO:0043436;GO:0044237;GO:0044238;GO:0044255;GO:0044281;GO:0055114;GO:0071704;GO:1901568;	GO:0005575;GO:0005622;GO:0005623;GO:0005737;GO:0009507;GO:0009532;GO:0009534;GO:0009536;GO:0009570;GO:0009579;GO:0031976;GO:0031984;GO:0043226;GO:0043227;GO:0043229;GO:0043231;GO:0044422;GO:0044424;GO:0044434;GO:0044435;GO:0044444;GO:0044446;GO:0044464;	Plant lipoxygenase may be involved in a number of diverse aspects of plant physiology including growth and development, pest resistance, and senescence or responses to wounding	Lipoxygenase
Cla97C02G049690	2784	165.632	458.737	1.46702	2e-27	1.14e-25	Up	K00454 LOX2S; lipoxygenase [EC:1.13.11.12]	ko00591:Linoleic acid metabolism|ko00592:alpha-Linolenic acid metabolism	NA	NA	NA	Plant lipoxygenase may be involved in a number of diverse aspects of plant physiology including growth and development, pest resistance, and senescence or responses to wounding	Lipoxygenase
Cla97C02G049890	1023	70.6694	161.959	1.19303	6.43e-10	7.47e-09	Up	K00430 E1.11.1.7; peroxidase [EC:1.11.1.7]	ko00940:Phenylpropanoid biosynthesis	NA	NA	GO:0005575;GO:0005622;GO:0005623;GO:0005737;GO:0005773;GO:0005774;GO:0016020;GO:0031090;GO:0043226;GO:0043227;GO:0043229;GO:0043231;GO:0044422;GO:0044424;GO:0044437;GO:0044444;GO:0044446;GO:0044464;GO:0098588;GO:0098805;	Removal of H(2)O(2), oxidation of toxic reductants, biosynthesis and degradation of lignin, suberization, auxin catabolism, response to environmental stresses such as wounding, pathogen attack and oxidative stress	Peroxidase
Cla97C02G049930	1026	239	512.202	1.09534	3.86e-19	1.24e-17	Up	K00430 E1.11.1.7; peroxidase [EC:1.11.1.7]	ko00940:Phenylpropanoid biosynthesis	NA	GO:0000003;GO:0002215;GO:0003006;GO:0006950;GO:0006952;GO:0007275;GO:0008150;GO:0009791;GO:0009908;GO:0022414;GO:0032501;GO:0032502;GO:0048367;GO:0048608;GO:0048731;GO:0048856;GO:0050896;GO:0061458;GO:0090567;GO:0009605;GO:0009607;GO:0051707;GO:0043207;GO:0051704;GO:0098542;	GO:0005575;GO:0005622;GO:0005623;GO:0005737;GO:0005794;GO:0012505;GO:0043226;GO:0043227;GO:0043229;GO:0043231;GO:0044424;GO:0044444;GO:0044464;	Belongs to the peroxidase family. Classical plant (class III) peroxidase subfamily	Peroxidase
Cla97C02G049940	960	771.771	1731.46	1.16455	6.66e-60	1.27e-57	Up	K00430 E1.11.1.7; peroxidase [EC:1.11.1.7]	ko00940:Phenylpropanoid biosynthesis	NA	NA	NA	Removal of H(2)O(2), oxidation of toxic reductants, biosynthesis and degradation of lignin, suberization, auxin catabolism, response to environmental stresses such as wounding, pathogen attack and oxidative stress	Peroxidase
Cla97C02G050010	381	50.565	133.256	1.39532	1.51e-10	1.92e-09	Up	NA	NA	NA	NA	NA	NA	Transmembrane protein
Cla97C03G051120	1281	1029.38	2301.45	1.16087	1.77e-65	3.86e-63	Up	NA	NA	NA	NA	NA	cinnamoyl-CoA reductase 1-like	Cinnamoyl-CoA reductase 1
Cla97C03G051690	1545	4.53386	21.3462	2.24259	0.000300498	0.00124511	Up	K15401 CYP86A1; long-chain fatty acid omega-monooxygenase [EC:1.14.14.80]	ko00071:Fatty acid degradation|ko00073:Cutin, suberine and wax biosynthesis	GO:0003674;GO:0003824;GO:0004497;GO:0016491;GO:0016705;GO:0016713;GO:0018685;	GO:0006082;GO:0006629;GO:0006631;GO:0006725;GO:0008150;GO:0008152;GO:0009058;GO:0009698;GO:0009699;GO:0009987;GO:0010345;GO:0019438;GO:0019748;GO:0019752;GO:0032787;GO:0043436;GO:0044237;GO:0044238;GO:0044249;GO:0044255;GO:0044281;GO:0044550;GO:0055114;GO:0071704;GO:1901360;GO:1901362;GO:1901576;	GO:0005575;GO:0005622;GO:0005623;GO:0005737;GO:0005773;GO:0043226;GO:0043227;GO:0043229;GO:0043231;GO:0044424;GO:0044444;GO:0044464;	Cytochrome p450	Cytochrome P450
Cla97C03G051740	1830	62.4114	257.508	2.0458	5.71e-26	3.02e-24	Up	K05349 bglX; beta-glucosidase [EC:3.2.1.21]	ko00460:Cyanoamino acid metabolism|ko00500:Starch and sucrose metabolism|ko00999:Biosynthesis of various plant secondary metabolites	GO:0003674;GO:0003824;GO:0004553;GO:0008422;GO:0015926;GO:0016787;GO:0016798;	GO:0000272;GO:0005975;GO:0005976;GO:0008150;GO:0008152;GO:0009056;GO:0009057;GO:0009251;GO:0016052;GO:0043170;GO:0044042;GO:0044238;GO:0071704;GO:1901575;	GO:0000323;GO:0005575;GO:0005622;GO:0005623;GO:0005737;GO:0005764;GO:0005773;GO:0005886;GO:0016020;GO:0043226;GO:0043227;GO:0043229;GO:0043231;GO:0044424;GO:0044444;GO:0044464;GO:0071944;	Belongs to the glycosyl hydrolase 3 family	Beta-glucosidase
Cla97C03G051930	483	880.921	8292.84	3.23556	0	0	Up	K13993 HSP20; HSP20 family protein	ko04141:Protein processing in endoplasmic reticulum	NA	NA	GO:0005575;GO:0005622;GO:0005623;GO:0005737;GO:0044424;GO:0044464;	Belongs to the small heat shock protein (HSP20) family	Class I heat shock protein
Cla97C03G051970	933	80.0709	192.418	1.26329	7.11e-11	9.49e-10	Up	NA	NA	GO:0003674;GO:0003824;GO:0008194;GO:0016740;GO:0016757;GO:0016758;GO:0035251;GO:0046527;GO:0047254;GO:0080043;GO:0080044;	NA	GO:0005575;GO:0005622;GO:0005623;GO:0043226;GO:0043227;GO:0043229;GO:0043231;GO:0044424;GO:0044464;	UDP-glycosyltransferase 76E2-like	Glycosyltransferase
Cla97C03G054210	1536	102.936	416.739	2.02294	1.06e-45	1.26e-43	Up	K20617 CYP71A; cytochrome P450 family 71 subfamily A	NA	GO:0003674;GO:0003824;GO:0004497;GO:0016491;GO:0016705;GO:0016709;	GO:0008150;GO:0008152;GO:0009058;GO:0019748;GO:0044550;GO:0055114;	GO:0005575;GO:0005622;GO:0005623;GO:0005737;GO:0005783;GO:0005789;GO:0012505;GO:0016020;GO:0031090;GO:0031984;GO:0042175;GO:0043226;GO:0043227;GO:0043229;GO:0043231;GO:0044422;GO:0044424;GO:0044425;GO:0044432;GO:0044444;GO:0044446;GO:0044464;GO:0098827;	Cytochrome p450	cytochrome P450 71A1-like
Cla97C03G054220	1263	62.3475	403.003	2.69378	4.17e-61	8.28e-59	Up	K20617 CYP71A; cytochrome P450 family 71 subfamily A	NA	GO:0003674;GO:0003824;GO:0004497;GO:0016491;GO:0016705;GO:0016709;	GO:0008150;GO:0008152;GO:0009058;GO:0019748;GO:0044550;GO:0055114;	GO:0005575;GO:0005622;GO:0005623;GO:0005737;GO:0005783;GO:0005789;GO:0012505;GO:0016020;GO:0031090;GO:0031984;GO:0042175;GO:0043226;GO:0043227;GO:0043229;GO:0043231;GO:0044422;GO:0044424;GO:0044425;GO:0044432;GO:0044444;GO:0044446;GO:0044464;GO:0098827;	Cytochrome p450	cytochrome P450 71A1-like
Cla97C03G054230	945	38.251	152.239	1.99734	1.36e-18	4.14e-17	Up	K20617 CYP71A; cytochrome P450 family 71 subfamily A	NA	GO:0003674;GO:0003824;GO:0004497;GO:0016491;GO:0016705;GO:0016709;	GO:0008150;GO:0008152;GO:0009058;GO:0019748;GO:0044550;GO:0055114;	GO:0005575;GO:0005622;GO:0005623;GO:0005737;GO:0005783;GO:0005789;GO:0012505;GO:0016020;GO:0031090;GO:0031984;GO:0042175;GO:0043226;GO:0043227;GO:0043229;GO:0043231;GO:0044422;GO:0044424;GO:0044425;GO:0044432;GO:0044444;GO:0044446;GO:0044464;GO:0098827;	Cytochrome p450	cytochrome P450 71A1-like
Cla97C03G054330	1014	11.0311	57.7399	2.3747	1.83e-09	2.02e-08	Up	K01051 E3.1.1.11; pectinesterase [EC:3.1.1.11]	ko00040:Pentose and glucuronate interconversions	NA	NA	NA	Pectinesterase	Pectinesterase
Cla97C03G054340	987	31.4464	100.575	1.68395	5.65e-10	6.63e-09	Up	K01051 E3.1.1.11; pectinesterase [EC:3.1.1.11]	ko00040:Pentose and glucuronate interconversions	GO:0003674;GO:0003824;GO:0004857;GO:0016787;GO:0016788;GO:0030234;GO:0030599;GO:0046910;GO:0052689;GO:0098772;	GO:0008150;GO:0043086;GO:0044092;GO:0050790;GO:0065007;GO:0065009;	GO:0005575;GO:0005623;GO:0044464;GO:0071944;	pectinesterase pectinesterase inhibitor	Pectinesterase
Cla97C03G054350	453	118.507	262.486	1.14822	1.78e-14	3.74e-13	Up	NA	NA	NA	NA	NA	NA	Unknown protein
Cla97C03G054790	1287	258.971	531.135	1.03492	1.36e-20	4.89e-19	Up	K01940 argG, ASS1; argininosuccinate synthase [EC:6.3.4.5]	ko00220:Arginine biosynthesis|ko00250:Alanine, aspartate and glutamate metabolism	GO:0003674;GO:0003824;GO:0004055;GO:0016874;GO:0016879;	GO:0000050;GO:0000053;GO:0006082;GO:0006520;GO:0006525;GO:0006526;GO:0006575;GO:0006807;GO:0008150;GO:0008152;GO:0008652;GO:0009058;GO:0009064;GO:0009084;GO:0009987;GO:0016053;GO:0019627;GO:0019752;GO:0034641;GO:0043436;GO:0043603;GO:0043604;GO:0044237;GO:0044238;GO:0044249;GO:0044271;GO:0044281;GO:0044283;GO:0046394;GO:0071704;GO:0071941;GO:0072350;GO:1901564;GO:1901566;GO:1901576;GO:1901605;GO:…	GO:0005575;GO:0005622;GO:0005623;GO:0005737;GO:0009507;GO:0009532;GO:0009536;GO:0009570;GO:0043226;GO:0043227;GO:0043229;GO:0043231;GO:0044422;GO:0044424;GO:0044434;GO:0044435;GO:0044444;GO:0044446;GO:0044464;	Argininosuccinate synthase	Citrulline--aspartate ligase
Cla97C03G055340	1392	13.7838	32.2751	1.20949	0.00792569	0.0222113	Up	NA	NA	GO:0003674;GO:0003824;GO:0004842;GO:0005488;GO:0005515;GO:0008134;GO:0016740;GO:0019787;GO:0140096;	GO:0006355;GO:0006464;GO:0006508;GO:0006511;GO:0006807;GO:0008150;GO:0008152;GO:0009056;GO:0009057;GO:0009889;GO:0009987;GO:0010468;GO:0010498;GO:0010556;GO:0016567;GO:0019219;GO:0019222;GO:0019538;GO:0019941;GO:0030163;GO:0031146;GO:0031323;GO:0031326;GO:0032446;GO:0036211;GO:0043161;GO:0043170;GO:0043412;GO:0043632;GO:0044237;GO:0044238;GO:0044248;GO:0044257;GO:0044260;GO:0044265;GO:0044267;GO:…	NA	protein UNUSUAL FLORAL	Protein UNUSUAL FLORAL ORGANS-like
Cla97C03G055480	2109	407.042	854.089	1.06648	8.15e-32	5.93e-30	Up	NA	NA	NA	NA	NA	ankyrin repeat-containing protein	Ankyrin repeat-containing protein
Cla97C03G055910	597	160.722	333.185	1.04704	3.28e-14	6.61e-13	Up	NA	NA	NA	NA	NA	Senescence regulator	Protein of unknown function, DUF584
Cla97C03G055920	351	17.8016	37.2932	1.07722	0.00657438	0.0188906	Up	NA	NA	NA	NA	NA	NA	DUF4228 domain-containing protein
Cla97C03G055940	342	9.52977	26.9255	1.4897	0.00321306	0.0101486	Up	NA	NA	NA	NA	NA	NA	Unknown protein
Cla97C03G056240	2250	1.52231	12.7634	3.01002	0.00195513	0.0065723	Up	NA	NA	GO:0003674;GO:0003824;GO:0004672;GO:0004674;GO:0016301;GO:0016740;GO:0016772;GO:0016773;GO:0140096;	GO:0001101;GO:0002376;GO:0006464;GO:0006468;GO:0006793;GO:0006796;GO:0006807;GO:0006950;GO:0006952;GO:0006955;GO:0008150;GO:0008152;GO:0008219;GO:0009605;GO:0009607;GO:0009617;GO:0009627;GO:0009719;GO:0009725;GO:0009751;GO:0009814;GO:0009987;GO:0010033;GO:0012501;GO:0014070;GO:0016310;GO:0019538;GO:0036211;GO:0042221;GO:0042493;GO:0042742;GO:0043170;GO:0043207;GO:0043412;GO:0044237;GO:0044238;GO:…	GO:0005575;GO:0005576;GO:0005623;GO:0005886;GO:0016020;GO:0044464;GO:0048046;GO:0071944;	Cysteine-rich receptor-like protein kinase	cysteine-rich receptor-like protein kinase 6
Cla97C03G056540	2505	9.15392	24.4143	1.41375	0.0101257	0.0273879	Up	NA	NA	GO:0003674;GO:0003824;GO:0004672;GO:0004674;GO:0005488;GO:0005515;GO:0005516;GO:0016301;GO:0016740;GO:0016772;GO:0016773;GO:0140096;	GO:0006464;GO:0006468;GO:0006793;GO:0006796;GO:0006807;GO:0008150;GO:0008152;GO:0009987;GO:0016310;GO:0019538;GO:0036211;GO:0043170;GO:0043412;GO:0044237;GO:0044238;GO:0044260;GO:0044267;GO:0071704;GO:1901564;	GO:0005575;GO:0005623;GO:0005886;GO:0016020;GO:0044464;GO:0071944;	G-type lectin S-receptor-like serine threonine-protein kinase	Receptor-like serine/threonine-protein kinase
Cla97C03G056670	342	18.7572	95.0973	2.33008	4.37e-13	7.75e-12	Up	NA	NA	NA	NA	NA	G-type lectin S-receptor-like Serine	Receptor-like serine/threonine-protein kinase
Cla97C03G056780	210	20.634	76.4787	1.89305	1.3e-09	1.45e-08	Up	NA	NA	NA	NA	NA	Wound-induced protein	Wound-responsive family protein
Cla97C03G058060	327	22.1603	51.4674	1.22071	0.000938793	0.00343291	Up	NA	NA	GO:0003674;GO:0003712;GO:0003714;GO:0140110;	GO:0006950;GO:0008150;GO:0009611;GO:0009889;GO:0009890;GO:0009892;GO:0009966;GO:0010556;GO:0010558;GO:0010605;GO:0010646;GO:0019219;GO:0019222;GO:0023051;GO:0031323;GO:0031324;GO:0031326;GO:0031327;GO:0031347;GO:0045934;GO:0048519;GO:0048523;GO:0048583;GO:0050789;GO:0050794;GO:0050896;GO:0051171;GO:0051172;GO:0051252;GO:0051253;GO:0060255;GO:0065007;GO:0080090;GO:0080134;GO:1902679;GO:1903506;GO:…	GO:0005575;GO:0005622;GO:0005623;GO:0005634;GO:0043226;GO:0043227;GO:0043229;GO:0043231;GO:0044424;GO:0044464;	TIFY 5A-like	protein TIFY 5A-like
Cla97C03G058580	489	47.419	100.826	1.08788	1.15e-05	6.55e-05	Up	NA	NA	GO:0000166;GO:0003674;GO:0003824;GO:0004672;GO:0004674;GO:0004683;GO:0005488;GO:0005515;GO:0005524;GO:0008092;GO:0008144;GO:0016301;GO:0016740;GO:0016772;GO:0016773;GO:0016905;GO:0017022;GO:0017076;GO:0030554;GO:0032553;GO:0032555;GO:0032559;GO:0035639;GO:0036094;GO:0043167;GO:0043168;GO:0045159;GO:0097159;GO:0097367;GO:0140096;GO:1901265;GO:1901363;	GO:0000278;GO:0000281;GO:0000910;GO:0006464;GO:0006468;GO:0006793;GO:0006796;GO:0006807;GO:0006996;GO:0007010;GO:0007049;GO:0008150;GO:0008152;GO:0009987;GO:0016043;GO:0016310;GO:0018107;GO:0018193;GO:0018210;GO:0019538;GO:0022402;GO:0022411;GO:0030029;GO:0030036;GO:0031033;GO:0031035;GO:0031037;GO:0031038;GO:0032984;GO:0036211;GO:0043170;GO:0043412;GO:0043624;GO:0043933;GO:0044237;GO:0044238;GO:…	GO:0005575;GO:0005622;GO:0005623;GO:0005737;GO:0005826;GO:0005856;GO:0005938;GO:0015629;GO:0030863;GO:0030864;GO:0032153;GO:0032155;GO:0043226;GO:0043228;GO:0043229;GO:0043232;GO:0044422;GO:0044424;GO:0044430;GO:0044444;GO:0044446;GO:0044448;GO:0044464;GO:0070938;GO:0071944;GO:0099568;	RING-type zinc-finger	Transducin/WD40 repeat-like superfamily protein
Cla97C03G058980	546	6.73502	48.7528	2.84876	6.89e-09	7.01e-08	Up	NA	NA	NA	NA	NA	Domain of unknown function (DUF4228)	DUF4228 domain-containing protein
Cla97C03G059180	1044	27.882	58.1207	1.06954	0.00105948	0.00381766	Up	NA	NA	NA	NA	NA	NA	nuclear envelope pore membrane protein POM 121-like
Cla97C03G060420	2745	213.916	571.251	1.41787	1.5e-36	1.32e-34	Up	K10534 NR; nitrate reductase (NAD(P)H) [EC:1.7.1.1 1.7.1.2 1.7.1.3]	ko00910:Nitrogen metabolism	GO:0003674;GO:0003824;GO:0008940;GO:0009703;GO:0016491;GO:0016661;GO:0046857;	GO:0001505;GO:0006082;GO:0006807;GO:0006809;GO:0008150;GO:0008152;GO:0009058;GO:0009314;GO:0009416;GO:0009605;GO:0009607;GO:0009608;GO:0009610;GO:0009620;GO:0009628;GO:0009987;GO:0017144;GO:0034641;GO:0042126;GO:0042128;GO:0042133;GO:0042136;GO:0043207;GO:0043436;GO:0044237;GO:0044249;GO:0044271;GO:0044281;GO:0046209;GO:0050896;GO:0051704;GO:0051707;GO:0055114;GO:0065007;GO:0065008;GO:0071704;GO:…	GO:0005575;GO:0005622;GO:0005623;GO:0005737;GO:0005773;GO:0005829;GO:0005886;GO:0016020;GO:0043226;GO:0043227;GO:0043229;GO:0043231;GO:0044424;GO:0044444;GO:0044464;GO:0071944;	Nitrate reductase is a key enzyme involved in the first step of nitrate assimilation in plants, fungi and bacteria	Nitrate reductase
Cla97C03G060620	1401	159.477	391.166	1.29098	6.02e-20	2.04e-18	Up	K13946 AUX1, LAX; auxin influx carrier (AUX1 LAX family)	ko04075:Plant hormone signal transduction	GO:0003674;GO:0005215;GO:0005342;GO:0008509;GO:0008514;GO:0010328;GO:0015075;GO:0015171;GO:0015318;GO:0022857;GO:0046943;GO:0080161;	GO:0003333;GO:0006810;GO:0006811;GO:0006820;GO:0006865;GO:0007275;GO:0008150;GO:0009653;GO:0009719;GO:0009725;GO:0009733;GO:0009791;GO:0009914;GO:0009926;GO:0010015;GO:0010033;GO:0010101;GO:0010102;GO:0010311;GO:0010817;GO:0015711;GO:0015849;GO:0022622;GO:0032501;GO:0032502;GO:0034220;GO:0042221;GO:0046942;GO:0048364;GO:0048527;GO:0048528;GO:0048646;GO:0048731;GO:0048829;GO:0048856;GO:0050896;GO:…	GO:0005575;GO:0005623;GO:0005886;GO:0016020;GO:0044464;GO:0071944;	Auxin transporter-like protein	auxin transporter-like protein 3
Cla97C03G060820	951	49.1384	108.437	1.1406	2.38e-06	1.54e-05	Up	K09287 RAV; RAV-like factor	NA	GO:0001067;GO:0003674;GO:0003676;GO:0003677;GO:0003700;GO:0005488;GO:0043565;GO:0044212;GO:0097159;GO:0140110;GO:1901363;	GO:0000003;GO:0003006;GO:0006355;GO:0007275;GO:0008150;GO:0009314;GO:0009416;GO:0009628;GO:0009648;GO:0009719;GO:0009725;GO:0009741;GO:0009791;GO:0009889;GO:0009890;GO:0009892;GO:0009909;GO:0009910;GO:0010033;GO:0010228;GO:0010468;GO:0010556;GO:0010558;GO:0010605;GO:0010629;GO:0014070;GO:0019219;GO:0019222;GO:0022414;GO:0022622;GO:0031323;GO:0031324;GO:0031326;GO:0031327;GO:0032501;GO:0032502;GO:…	GO:0005575;GO:0005622;GO:0005623;GO:0005634;GO:0043226;GO:0043227;GO:0043229;GO:0043231;GO:0044424;GO:0044464;	AP2 ERF and B3 domain-containing transcription	AP2/ERF and B3 domain-containing transcription factor RAV1-like
Cla97C03G060990	540	25.9848	58.0904	1.16012	0.000215241	0.000920057	Up	K16223 FT; protein FLOWERING LOCUS T	ko04712:Circadian rhythm - plant	GO:0003674;GO:0005488;GO:0005543;GO:0008289;GO:0008429;GO:0043167;GO:0043168;	GO:0000003;GO:0003006;GO:0007275;GO:0008150;GO:0009314;GO:0009416;GO:0009628;GO:0009648;GO:0009791;GO:0009909;GO:0010228;GO:0010229;GO:0022414;GO:0032501;GO:0032502;GO:0040034;GO:0048367;GO:0048506;GO:0048509;GO:0048510;GO:0048518;GO:0048572;GO:0048573;GO:0048575;GO:0048576;GO:0048578;GO:0048580;GO:0048582;GO:0048583;GO:0048584;GO:0048586;GO:0048587;GO:0048608;GO:0048731;GO:0048831;GO:0048856;GO:…	GO:0005575;GO:0005622;GO:0005623;GO:0005634;GO:0043226;GO:0043227;GO:0043229;GO:0043231;GO:0044424;GO:0044464;	flowering locus	Flowering locus T-like protein
Cla97C03G061280	1236	55.9222	176.918	1.65461	2.26e-16	5.59e-15	Up	K19365 BSCL2; seipin	NA	NA	GO:0000003;GO:0003006;GO:0006996;GO:0007275;GO:0008150;GO:0009791;GO:0009846;GO:0009856;GO:0009987;GO:0010154;GO:0010162;GO:0010344;GO:0010431;GO:0010876;GO:0016043;GO:0019915;GO:0021700;GO:0022414;GO:0022607;GO:0022611;GO:0032501;GO:0032502;GO:0032504;GO:0033036;GO:0034389;GO:0043900;GO:0044085;GO:0044706;GO:0048316;GO:0048608;GO:0048609;GO:0048731;GO:0048856;GO:0050789;GO:0051179;GO:0051235;GO:…	GO:0005575;GO:0005622;GO:0005623;GO:0005737;GO:0005783;GO:0012505;GO:0043226;GO:0043227;GO:0043229;GO:0043231;GO:0044424;GO:0044444;GO:0044464;	Putative adipose-regulatory protein (Seipin)	seipin-1
Cla97C03G063540	204	15.1931	34.9595	1.20812	0.00340256	0.0106639	Up	NA	NA	NA	NA	NA	NA	Unknown protein
Cla97C03G063890	1527	4.86279	22.1431	2.19353	0.00033322	0.00136664	Up	K01188 E3.2.1.21; beta-glucosidase [EC:3.2.1.21]	ko00460:Cyanoamino acid metabolism|ko00500:Starch and sucrose metabolism|ko00999:Biosynthesis of various plant secondary metabolites	GO:0003674;GO:0003824;GO:0004553;GO:0008422;GO:0015926;GO:0016787;GO:0016798;	GO:0008150;GO:0008152;GO:0071704;GO:1901135;GO:1901657;	NA	Belongs to the glycosyl hydrolase 1 family	beta-glucosidase 12-like
Cla97C03G063990	1164	36.4634	281.592	2.95673	2.15e-50	2.96e-48	Up	K00208 fabI; enoyl-[acyl-carrier protein] reductase I [EC:1.3.1.9 1.3.1.10]	ko00061:Fatty acid biosynthesis|ko00780:Biotin metabolism	GO:0003674;GO:0003824;GO:0005488;GO:0005507;GO:0016491;GO:0016627;GO:0016628;GO:0016631;GO:0043167;GO:0043169;GO:0046872;GO:0046914;	GO:0006082;GO:0006629;GO:0006631;GO:0006633;GO:0008150;GO:0008152;GO:0008610;GO:0009058;GO:0009987;GO:0016053;GO:0019752;GO:0032787;GO:0043436;GO:0044237;GO:0044238;GO:0044249;GO:0044255;GO:0044281;GO:0044283;GO:0046394;GO:0055114;GO:0071704;GO:0072330;GO:1901576;	GO:0005575;GO:0005622;GO:0005623;GO:0005737;GO:0005829;GO:0005835;GO:0009507;GO:0009526;GO:0009532;GO:0009536;GO:0009570;GO:0009579;GO:0009941;GO:0031967;GO:0031975;GO:0032991;GO:0043226;GO:0043227;GO:0043229;GO:0043231;GO:0044422;GO:0044424;GO:0044434;GO:0044435;GO:0044444;GO:0044445;GO:0044446;GO:0044464;	Enoyl- acyl-carrier-protein reductase NADH , chloroplastic-like	enoyl-[acyl-carrier-protein] reductase [NADH], chloroplastic-like
Cla97C03G064210	1668	24.86	92.5616	1.90584	4.41e-11	6.06e-10	Up	K00423 E1.10.3.3; L-ascorbate oxidase [EC:1.10.3.3]	ko00053:Ascorbate and aldarate metabolism	NA	NA	NA	Belongs to the multicopper oxidase family	L-ascorbate oxidase
Cla97C03G064220	1080	3.90814	23.858	2.62683	3.04e-05	0.000158268	Up	K00423 E1.10.3.3; L-ascorbate oxidase [EC:1.10.3.3]	ko00053:Ascorbate and aldarate metabolism	NA	NA	NA	Belongs to the multicopper oxidase family	L-ascorbate oxidase
Cla97C03G064570	216	4.80966	15.2951	1.6642	0.0146281	0.0376013	Up	NA	NA	NA	NA	NA	NA	Unknown protein
Cla97C03G065030	600	174.448	420.243	1.26513	4.22e-19	1.35e-17	Up	NA	NA	GO:0003674;GO:0004857;GO:0030234;GO:0098772;	GO:0008150;GO:0043086;GO:0044092;GO:0048509;GO:0050789;GO:0050790;GO:0050793;GO:0065007;GO:0065009;GO:1902183;GO:0009888;GO:0032502;GO:0048507;GO:0048856;GO:1902182;	NA	21 kDa protein	Plant invertase/pectin methylesterase inhibitor superfamily protein
Cla97C03G065100	2478	18.04	38.5039	1.09711	0.0137012	0.0355165	Up	NA	NA	GO:0003674;GO:0003824;GO:0004553;GO:0004565;GO:0015925;GO:0016787;GO:0016798;	NA	GO:0005575;GO:0005618;GO:0005622;GO:0005623;GO:0005737;GO:0005773;GO:0030312;GO:0043226;GO:0043227;GO:0043229;GO:0043231;GO:0044424;GO:0044444;GO:0044464;GO:0071944;	beta-galactosidase	Beta-galactosidase
Cla97C03G065270	1341	4.4968	17.6315	1.96982	0.0026727	0.00864283	Up	NA	NA	GO:0003674;GO:0003824;GO:0004672;GO:0004674;GO:0004675;GO:0004888;GO:0016301;GO:0016740;GO:0016772;GO:0016773;GO:0019199;GO:0038023;GO:0060089;GO:0140096;	GO:0002682;GO:0002683;GO:0006464;GO:0006468;GO:0006793;GO:0006796;GO:0006807;GO:0006950;GO:0006952;GO:0007154;GO:0007165;GO:0007166;GO:0007167;GO:0007178;GO:0008150;GO:0008152;GO:0009605;GO:0009607;GO:0009617;GO:0009987;GO:0016310;GO:0019538;GO:0023052;GO:0036211;GO:0042742;GO:0043170;GO:0043207;GO:0043412;GO:0044237;GO:0044238;GO:0044260;GO:0044267;GO:0048519;GO:0048583;GO:0048585;GO:0050776;GO:…	GO:0005575;GO:0005623;GO:0005886;GO:0016020;GO:0044464;GO:0071944;	Serine threonine-protein kinase	Protein kinase domain-containing protein
Cla97C03G065310	909	18.5024	42.3791	1.19356	0.00133452	0.0046918	Up	NA	NA	NA	NA	NA	NA	N-acetyltransferase domain-containing protein
Cla97C03G065810	1659	9.51927	24.8381	1.36734	0.0129065	0.0337373	Up	K00279 CKX; cytokinin dehydrogenase [EC:1.5.99.12]	ko00908:Zeatin biosynthesis	GO:0003674;GO:0003824;GO:0008131;GO:0016491;GO:0016638;GO:0016641;GO:0016645;GO:0019139;	GO:0006725;GO:0006807;GO:0008150;GO:0008152;GO:0009056;GO:0009308;GO:0009690;GO:0009823;GO:0009987;GO:0010817;GO:0034754;GO:0042445;GO:0042447;GO:0044237;GO:0046483;GO:0055114;GO:0065007;GO:0065008;GO:0071704;GO:1901564;	GO:0005575;GO:0005576;GO:0005615;GO:0005622;GO:0005623;GO:0005737;GO:0005783;GO:0005788;GO:0012505;GO:0031974;GO:0043226;GO:0043227;GO:0043229;GO:0043231;GO:0043233;GO:0044421;GO:0044422;GO:0044424;GO:0044432;GO:0044444;GO:0044446;GO:0044464;GO:0070013;	Cytokinin dehydrogenase	Cytokinin dehydrogenase
Cla97C03G065970	897	254.331	711.811	1.48547	6.02e-46	7.25e-44	Up	K01489 cdd, CDA; cytidine deaminase [EC:3.5.4.5]	ko00240:Pyrimidine metabolism	GO:0003674;GO:0003824;GO:0004126;GO:0005488;GO:0005515;GO:0008270;GO:0016787;GO:0016810;GO:0016814;GO:0019239;GO:0042802;GO:0042803;GO:0043167;GO:0043169;GO:0046872;GO:0046914;GO:0046983;GO:0047844;	GO:0006139;GO:0006213;GO:0006216;GO:0006725;GO:0006807;GO:0008150;GO:0008152;GO:0009056;GO:0009116;GO:0009119;GO:0009164;GO:0009972;GO:0009987;GO:0019439;GO:0034641;GO:0034655;GO:0034656;GO:0042454;GO:0044237;GO:0044238;GO:0044248;GO:0044270;GO:0044281;GO:0044282;GO:0046087;GO:0046131;GO:0046133;GO:0046135;GO:0046483;GO:0046700;GO:0055086;GO:0071704;GO:0072527;GO:0072529;GO:1901135;GO:1901136;GO:…	GO:0005575;GO:0005622;GO:0005623;GO:0005737;GO:0005829;GO:0044424;GO:0044444;GO:0044464;	Cytidine deaminase	Cytidine deaminase
Cla97C03G066980	453	43.7815	171.032	1.96807	2.33e-20	8.17e-19	Up	K14490 AHP; histidine-containing phosphotransfer peotein	ko04075:Plant hormone signal transduction	GO:0003674;GO:0003824;GO:0004672;GO:0005488;GO:0005515;GO:0009927;GO:0016301;GO:0016740;GO:0016772;GO:0016773;GO:0019899;GO:0019900;GO:0019901;GO:0043424;GO:0060089;GO:0140096;	GO:0000160;GO:0006464;GO:0006468;GO:0006793;GO:0006796;GO:0006807;GO:0007154;GO:0007165;GO:0008150;GO:0008152;GO:0009719;GO:0009725;GO:0009735;GO:0009736;GO:0009755;GO:0009987;GO:0010033;GO:0016310;GO:0019538;GO:0023052;GO:0032870;GO:0035556;GO:0036211;GO:0042221;GO:0043170;GO:0043412;GO:0044237;GO:0044238;GO:0044260;GO:0044267;GO:0050789;GO:0050794;GO:0050896;GO:0051716;GO:0065007;GO:0070887;GO:…	GO:0005575;GO:0005622;GO:0005623;GO:0005634;GO:0005737;GO:0043226;GO:0043227;GO:0043229;GO:0043231;GO:0044424;GO:0044464;	histidine-containing phosphotransfer protein	Histidine-containing phosphotransfer protein, putative
Cla97C03G067400	1284	74.1899	326.404	2.13578	4.49e-41	4.54e-39	Up	NA	NA	NA	NA	NA	ZINC FINGER protein	protein indeterminate-domain 12-like
Cla97C04G069130	455	13.4113	29.6054	1.13812	0.00991787	0.0269013	Up	NA	NA	NA	NA	NA	NA	Unknown protein
Cla97C04G070610	1434	1201.59	2625.18	1.12794	2.05e-71	4.93e-69	Up	K13495 CISZOG; cis-zeatin O-glucosyltransferase [EC:2.4.1.215]	ko00908:Zeatin biosynthesis	GO:0003674;GO:0003824;GO:0008194;GO:0016740;GO:0016757;GO:0016758;GO:0016763;GO:0035251;GO:0035252;GO:0042285;GO:0046527;GO:0050403;GO:0050404;	GO:0000003;GO:0003006;GO:0006464;GO:0006486;GO:0006725;GO:0006807;GO:0007275;GO:0008150;GO:0008152;GO:0009058;GO:0009059;GO:0009100;GO:0009101;GO:0009308;GO:0009653;GO:0009690;GO:0009791;GO:0009888;GO:0009889;GO:0009908;GO:0009965;GO:0009987;GO:0010015;GO:0010016;GO:0010073;GO:0010075;GO:0010083;GO:0010154;GO:0010380;GO:0010817;GO:0019222;GO:0019538;GO:0022414;GO:0022622;GO:0031323;GO:0031326;GO:…	NA	Belongs to the UDP-glycosyltransferase family	Glycosyltransferase
Cla97C04G071640	771	29.6922	64.7755	1.1188	0.000192552	0.000833993	Up	K09422 MYBP; transcription factor MYB, plant	NA	NA	NA	NA	Myb-related protein	myb-related protein 306
Cla97C04G071950	636	362.383	927.609	1.35362	2.37e-53	3.69e-51	Up	K13993 HSP20; HSP20 family protein	ko04141:Protein processing in endoplasmic reticulum	NA	GO:0006950;GO:0006970;GO:0008150;GO:0009266;GO:0009408;GO:0009628;GO:0050896;	NA	Belongs to the small heat shock protein (HSP20) family	Small heat shock protein
Cla97C04G072240	1713	98.2182	232.47	1.24597	5.82e-14	1.13e-12	Up	NA	NA	GO:0003674;GO:0003824;GO:0004672;GO:0004674;GO:0004683;GO:0005488;GO:0005515;GO:0005516;GO:0009931;GO:0010857;GO:0016301;GO:0016740;GO:0016772;GO:0016773;GO:0140096;	GO:0001101;GO:0006464;GO:0006468;GO:0006793;GO:0006796;GO:0006807;GO:0006950;GO:0007154;GO:0007165;GO:0008150;GO:0008152;GO:0009266;GO:0009408;GO:0009628;GO:0009719;GO:0009725;GO:0009737;GO:0009738;GO:0009755;GO:0009987;GO:0010033;GO:0010286;GO:0016310;GO:0018105;GO:0018193;GO:0018209;GO:0019538;GO:0023052;GO:0032870;GO:0033993;GO:0035556;GO:0036211;GO:0042221;GO:0043170;GO:0043412;GO:0044237;GO:…	GO:0005575;GO:0005622;GO:0005623;GO:0005634;GO:0005737;GO:0005886;GO:0016020;GO:0043226;GO:0043227;GO:0043229;GO:0043231;GO:0044424;GO:0044464;GO:0071944;	CDPK-related kinase	CDPK-related kinase
Cla97C04G073330	1272	18.2006	41.2783	1.17478	0.0025698	0.00835546	Up	NA	NA	GO:0003674;GO:0003824;GO:0008374;GO:0016407;GO:0016413;GO:0016740;GO:0016746;GO:0016747;GO:1990538;	GO:0000271;GO:0005975;GO:0005976;GO:0008150;GO:0008152;GO:0009058;GO:0009059;GO:0009987;GO:0010383;GO:0010410;GO:0016051;GO:0033692;GO:0034637;GO:0034645;GO:0042546;GO:0043170;GO:0044036;GO:0044038;GO:0044085;GO:0044237;GO:0044238;GO:0044249;GO:0044260;GO:0044262;GO:0044264;GO:0045491;GO:0045492;GO:0070589;GO:0070592;GO:0071554;GO:0071704;GO:0071840;GO:1901576;	GO:0005575;GO:0005622;GO:0005623;GO:0005737;GO:0005794;GO:0012505;GO:0043226;GO:0043227;GO:0043229;GO:0043231;GO:0044424;GO:0044444;GO:0044464;	Protein trichome birefringence-like 34	Trichome birefringence-like family
Cla97C04G073490	564	19.8752	48.6835	1.3004	0.00057772	0.00223065	Up	K01568 PDC, pdc; pyruvate decarboxylase [EC:4.1.1.1]	ko00010:Glycolysis / Gluconeogenesis	NA	NA	NA	Belongs to the TPP enzyme family	Pyruvate decarboxylase
Cla97C04G073510	1899	53.7208	142.653	1.40637	3.11e-11	4.36e-10	Up	K01568 PDC, pdc; pyruvate decarboxylase [EC:4.1.1.1]	ko00010:Glycolysis / Gluconeogenesis	NA	NA	NA	Belongs to the TPP enzyme family	Pyruvate decarboxylase
Cla97C04G073590	1347	56.1047	119.74	1.10047	1.76e-06	1.17e-05	Up	NA	NA	GO:0003674;GO:0003824;GO:0008374;GO:0016407;GO:0016413;GO:0016740;GO:0016746;GO:0016747;GO:1990538;	GO:0000271;GO:0005975;GO:0005976;GO:0006073;GO:0008150;GO:0008152;GO:0009058;GO:0009059;GO:0009250;GO:0009664;GO:0009827;GO:0009987;GO:0010383;GO:0010393;GO:0010410;GO:0016043;GO:0016051;GO:0017144;GO:0030243;GO:0030244;GO:0033692;GO:0034637;GO:0034645;GO:0042545;GO:0042546;GO:0043170;GO:0044036;GO:0044038;GO:0044042;GO:0044085;GO:0044237;GO:0044238;GO:0044249;GO:0044260;GO:0044262;GO:0044264;GO:…	GO:0005575;GO:0005622;GO:0005623;GO:0005737;GO:0005794;GO:0005886;GO:0012505;GO:0016020;GO:0043226;GO:0043227;GO:0043229;GO:0043231;GO:0044424;GO:0044444;GO:0044464;GO:0071944;	Protein trichome birefringence-like 3	Protein trichome birefringence-like
Cla97C04G074210	432	154.139	472.517	1.61349	6.32e-39	5.97e-37	Up	K13993 HSP20; HSP20 family protein	ko04141:Protein processing in endoplasmic reticulum	NA	NA	NA	Belongs to the small heat shock protein (HSP20) family	class I heat shock protein-like
Cla97C04G075230	795	66.3495	153.59	1.20075	8.77e-08	7.41e-07	Up	NA	NA	NA	NA	NA	Heavy-metal-associated domain	HMA domain-containing protein
Cla97C04G075550	309	3.13974	12.3799	1.95354	0.0153951	0.0392398	Up	NA	NA	NA	NA	NA	NA	Unknown protein
Cla97C04G075690	855	1419.14	3212.55	1.17803	5.25e-116	2.08e-113	Up	K09872 PIP; aquaporin PIP	NA	GO:0003674;GO:0003676;GO:0003723;GO:0003729;GO:0005215;GO:0005372;GO:0005488;GO:0015250;GO:0015267;GO:0015318;GO:0022803;GO:0022838;GO:0022857;GO:0097159;GO:1901363;	GO:0001101;GO:0006810;GO:0006811;GO:0006833;GO:0006950;GO:0008150;GO:0009414;GO:0009415;GO:0009628;GO:0009719;GO:0009725;GO:0009737;GO:0010033;GO:0010035;GO:0033993;GO:0034220;GO:0042044;GO:0042221;GO:0050896;GO:0051179;GO:0051234;GO:0055085;GO:0097305;GO:1901700;	GO:0005575;GO:0005622;GO:0005623;GO:0005737;GO:0005886;GO:0005887;GO:0005911;GO:0009506;GO:0009507;GO:0009536;GO:0016020;GO:0016021;GO:0030054;GO:0031224;GO:0031226;GO:0043226;GO:0043227;GO:0043229;GO:0043231;GO:0044424;GO:0044425;GO:0044444;GO:0044459;GO:0044464;GO:0055044;GO:0071944;	Belongs to the MIP aquaporin (TC 1.A.8) family	plasma membrane intrinsic protein 2
Cla97C04G075700	855	491.98	1211.46	1.30227	1.12e-59	2.09e-57	Up	K09872 PIP; aquaporin PIP	NA	GO:0003674;GO:0003676;GO:0003723;GO:0003729;GO:0005215;GO:0005372;GO:0005488;GO:0015250;GO:0015267;GO:0015318;GO:0022803;GO:0022838;GO:0022857;GO:0097159;GO:1901363;	GO:0001101;GO:0006810;GO:0006811;GO:0006833;GO:0006950;GO:0008150;GO:0009414;GO:0009415;GO:0009628;GO:0009719;GO:0009725;GO:0009737;GO:0010033;GO:0010035;GO:0033993;GO:0034220;GO:0042044;GO:0042221;GO:0050896;GO:0051179;GO:0051234;GO:0055085;GO:0097305;GO:1901700;	GO:0005575;GO:0005622;GO:0005623;GO:0005737;GO:0005886;GO:0005887;GO:0005911;GO:0009506;GO:0009507;GO:0009536;GO:0016020;GO:0016021;GO:0030054;GO:0031224;GO:0031226;GO:0043226;GO:0043227;GO:0043229;GO:0043231;GO:0044424;GO:0044425;GO:0044444;GO:0044459;GO:0044464;GO:0055044;GO:0071944;	Belongs to the MIP aquaporin (TC 1.A.8) family	aquaporin PIP2-2-like
Cla97C04G076360	1854	0.938582	36.7144	5.26039	1.78e-08	1.69e-07	Up	K01754 E4.3.1.19, ilvA, tdcB; threonine dehydratase [EC:4.3.1.19]	ko00260:Glycine, serine and threonine metabolism|ko00290:Valine, leucine and isoleucine biosynthesis	GO:0003674;GO:0005488;GO:0005515;GO:0042802;	NA	GO:0005575;GO:0005622;GO:0005623;GO:0005737;GO:0009507;GO:0009536;GO:0043226;GO:0043227;GO:0043229;GO:0043231;GO:0044424;GO:0044444;GO:0044464;	Threonine dehydratase biosynthetic	Threonine dehydratase
Cla97C04G077200	1230	27.4589	72.551	1.39381	1.15e-05	6.56e-05	Up	K17338 REEP1_2_3_4; receptor expression-enhancing protein 1/2/3/4	NA	NA	NA	NA	HVA22-like protein	HVA22-like protein
Cla97C04G077280	186	77.3917	191.84	1.31048	4.93e-13	8.69e-12	Up	NA	NA	NA	NA	NA	NA	Unknown protein
Cla97C04G077720	363	1893.22	4711.75	1.31486	1.21e-128	6.13e-126	Up	NA	NA	NA	NA	NA	Nonspecific lipid-transfer protein	Bifunctional inhibitor/lipid-transfer protein/seed storage 2S albumin superfamily protein
Cla97C04G078780	2727	3464.55	13750	1.98912	0	0	Up	K03695 clpB; ATP-dependent Clp protease ATP-binding subunit ClpB	NA	NA	GO:0000302;GO:0006417;GO:0006950;GO:0006979;GO:0008150;GO:0009266;GO:0009314;GO:0009408;GO:0009416;GO:0009628;GO:0009636;GO:0009642;GO:0009644;GO:0009889;GO:0009891;GO:0009893;GO:0009987;GO:0010035;GO:0010468;GO:0010556;GO:0010557;GO:0010604;GO:0010608;GO:0010628;GO:0019222;GO:0031323;GO:0031325;GO:0031326;GO:0031328;GO:0032268;GO:0032270;GO:0033554;GO:0034248;GO:0034250;GO:0034605;GO:0042221;GO:…	GO:0005575;GO:0005622;GO:0005623;GO:0005737;GO:0009507;GO:0009526;GO:0009532;GO:0009536;GO:0009570;GO:0009941;GO:0031967;GO:0031975;GO:0043226;GO:0043227;GO:0043229;GO:0043231;GO:0044422;GO:0044424;GO:0044434;GO:0044435;GO:0044444;GO:0044446;GO:0044464;	Chaperone protein	chaperone protein ClpB1
Cla97C04G079030	996	20.4107	84.5556	2.05977	2.42e-11	3.44e-10	Up	NA	NA	GO:0003674;GO:0003700;GO:0140110;	GO:0006355;GO:0008150;GO:0009889;GO:0010468;GO:0010556;GO:0019219;GO:0019222;GO:0031323;GO:0031326;GO:0050789;GO:0050794;GO:0051171;GO:0051252;GO:0060255;GO:0065007;GO:0080090;GO:1903506;GO:2000112;GO:2001141;GO:0008152;GO:0006139;GO:0006351;GO:0006725;GO:0006807;GO:0009058;GO:0009059;GO:0009987;GO:0010467;GO:0016070;GO:0018130;GO:0019438;GO:0032774;GO:0034641;GO:0034645;GO:0034654;GO:0043170;GO:…	NA	NAC domain-containing protein	NAC domain-containing protein
Cla97C04G079210	309	9.28547	29.8134	1.67801	0.000522018	0.00204009	Up	NA	NA	GO:0003674;GO:0003676;GO:0003677;GO:0005488;GO:0005515;GO:0042802;GO:0042803;GO:0046983;GO:0097159;GO:1901363;	GO:0001101;GO:0006355;GO:0007275;GO:0008150;GO:0009314;GO:0009416;GO:0009628;GO:0009639;GO:0009640;GO:0009719;GO:0009725;GO:0009733;GO:0009735;GO:0009737;GO:0009739;GO:0009741;GO:0009791;GO:0009889;GO:0009890;GO:0009892;GO:0010033;GO:0010468;GO:0010556;GO:0010558;GO:0010605;GO:0010629;GO:0014070;GO:0019219;GO:0019222;GO:0031323;GO:0031324;GO:0031326;GO:0031327;GO:0032501;GO:0032502;GO:0033993;GO:…	GO:0005575;GO:0005622;GO:0005623;GO:0005634;GO:0005737;GO:0043226;GO:0043227;GO:0043229;GO:0043231;GO:0044424;GO:0044464;	Mini zinc finger protein	Mini zinc finger
Cla97C04G079270	708	1744.29	4201.89	1.26873	3.53e-129	1.83e-126	Up	K00799 GST, gst; glutathione S-transferase [EC:2.5.1.18]	ko00480:Glutathione metabolism	GO:0003674;GO:0003824;GO:0004364;GO:0016740;GO:0016765;	GO:0006518;GO:0006575;GO:0006749;GO:0006790;GO:0006807;GO:0008150;GO:0008152;GO:0009056;GO:0009404;GO:0009407;GO:0009636;GO:0009987;GO:0019748;GO:0034641;GO:0042221;GO:0043603;GO:0044237;GO:0044248;GO:0050896;GO:0051186;GO:0071704;GO:0098754;GO:1901564;	GO:0005575;GO:0005622;GO:0005623;GO:0005737;GO:0044424;GO:0044464;	Glutathione S-transferase	Glutathione s-transferase
Cla97C04G079530	1119	367.542	972.927	1.40162	5.79e-52	8.49e-50	Up	NA	NA	NA	NA	NA	At4g15970-like	Nucleotide-diphospho-sugar transferase, nucleotide-diphospho-sugar transferase
Cla97C05G080030	669	19.8811	45.66	1.19358	0.0010914	0.00391806	Up	K09286 EREBP; EREBP-like factor	NA	NA	NA	NA	ethylene-responsive transcription factor	ethylene-responsive transcription factor 13-like
Cla97C05G080990	732	206.138	456.15	1.14554	1.32e-20	4.79e-19	Up	NA	NA	NA	NA	NA	NA	Enolase-phosphatase
Cla97C05G081790	1623	13.109	36.8469	1.49083	0.000409309	0.00164256	Up	NA	NA	NA	GO:0000003;GO:0003006;GO:0006325;GO:0006464;GO:0006476;GO:0006807;GO:0006996;GO:0007275;GO:0007276;GO:0008150;GO:0008152;GO:0009555;GO:0009893;GO:0009987;GO:0010468;GO:0010604;GO:0010628;GO:0016043;GO:0016569;GO:0016570;GO:0016575;GO:0019222;GO:0019538;GO:0019953;GO:0022412;GO:0022414;GO:0030154;GO:0032501;GO:0032502;GO:0032504;GO:0035601;GO:0036211;GO:0043170;GO:0043412;GO:0044237;GO:0044238;GO:…	GO:0000118;GO:0005575;GO:0005622;GO:0005623;GO:0005634;GO:0005654;GO:0031974;GO:0031981;GO:0032991;GO:0043226;GO:0043227;GO:0043229;GO:0043231;GO:0043233;GO:0044422;GO:0044424;GO:0044428;GO:0044446;GO:0044451;GO:0044464;GO:0048555;GO:0048556;GO:0070013;GO:1902494;	AT-rich interactive domain-containing protein	AT-rich interactive domain-containing protein 2-like isoform X1
Cla97C05G082460	1026	78.8155	157.856	1.00147	1.69e-07	1.36e-06	Up	K15919 HPR2_3; glyoxylate/hydroxypyruvate reductase [EC:1.1.1.79 1.1.1.81]	ko00260:Glycine, serine and threonine metabolism|ko00630:Glyoxylate and dicarboxylate metabolism	NA	NA	NA	Belongs to the D-isomer specific 2-hydroxyacid dehydrogenase family	Glyoxylate/hydroxypyruvate reductase HPR3-like
Cla97C05G082470	978	17.6169	121.574	2.78401	2.28e-21	8.84e-20	Up	K15919 HPR2_3; glyoxylate/hydroxypyruvate reductase [EC:1.1.1.79 1.1.1.81]	ko00260:Glycine, serine and threonine metabolism|ko00630:Glyoxylate and dicarboxylate metabolism	NA	NA	NA	Belongs to the D-isomer specific 2-hydroxyacid dehydrogenase family	Glyoxylate/hydroxypyruvate reductase HPR3-like
Cla97C05G083510	315	1039.81	2100.64	1.01299	1.4e-52	2.11e-50	Up	NA	NA	NA	NA	NA	zinc-finger of the FCS-type, C2-C2	FLZ-type domain-containing protein
Cla97C05G084100	882	31.6324	63.8383	1.01455	0.000921443	0.00337495	Up	NA	NA	GO:0003674;GO:0005488;GO:0030246;	NA	NA	f-box protein	F-box domain-containing protein
Cla97C05G085160	681	183.017	414.275	1.1736	1.18e-19	3.92e-18	Up	K14516 ERF1; ethylene-responsive transcription factor 1	ko04016:MAPK signaling pathway - plant|ko04075:Plant hormone signal transduction	GO:0003674;GO:0003676;GO:0003677;GO:0003700;GO:0005488;GO:0097159;GO:0140110;GO:1901363;	GO:0000160;GO:0001101;GO:0006355;GO:0006950;GO:0006952;GO:0007154;GO:0007165;GO:0008150;GO:0009719;GO:0009723;GO:0009725;GO:0009753;GO:0009755;GO:0009867;GO:0009873;GO:0009889;GO:0009987;GO:0010033;GO:0010468;GO:0010556;GO:0019219;GO:0019222;GO:0023052;GO:0031323;GO:0031326;GO:0032870;GO:0035556;GO:0042221;GO:0050789;GO:0050794;GO:0050896;GO:0051171;GO:0051252;GO:0051716;GO:0060255;GO:0065007;GO:…	GO:0005575;GO:0005622;GO:0005623;GO:0005634;GO:0043226;GO:0043227;GO:0043229;GO:0043231;GO:0044424;GO:0044464;	ethylene-responsive transcription factor	ethylene-responsive transcription factor 1B
Cla97C05G085820	318	61.2532	171.005	1.48579	1.47e-12	2.45e-11	Up	K24772 GG1_2; guanine nucleotide-binding protein subunit gamma 1/2, plant	NA	GO:0000166;GO:0001882;GO:0001883;GO:0003674;GO:0005488;GO:0005525;GO:0017076;GO:0019001;GO:0032549;GO:0032550;GO:0032553;GO:0032555;GO:0032561;GO:0035639;GO:0036094;GO:0043167;GO:0043168;GO:0097159;GO:0097367;GO:1901265;GO:1901363;	GO:0002376;GO:0006464;GO:0006497;GO:0006807;GO:0006810;GO:0006950;GO:0006952;GO:0006955;GO:0007275;GO:0008150;GO:0008152;GO:0009058;GO:0009059;GO:0009605;GO:0009607;GO:0009620;GO:0009791;GO:0009814;GO:0009817;GO:0009845;GO:0009914;GO:0009926;GO:0009987;GO:0010540;GO:0010541;GO:0010817;GO:0018342;GO:0018345;GO:0019538;GO:0022622;GO:0032501;GO:0032502;GO:0034645;GO:0036211;GO:0042157;GO:0042158;GO:…	GO:0000139;GO:0005575;GO:0005622;GO:0005623;GO:0005737;GO:0005794;GO:0005802;GO:0005834;GO:0005886;GO:0009898;GO:0012505;GO:0016020;GO:0019897;GO:0019898;GO:0031090;GO:0031234;GO:0031984;GO:0032588;GO:0032991;GO:0043226;GO:0043227;GO:0043229;GO:0043231;GO:0044422;GO:0044424;GO:0044425;GO:0044431;GO:0044444;GO:0044446;GO:0044459;GO:0044464;GO:0071944;GO:0098552;GO:0098562;GO:0098588;GO:0098791;GO:…	Guanine nucleotide-binding protein subunit gamma	guanine nucleotide-binding protein subunit gamma 2-like
Cla97C05G085830	354	5.44095	18.6594	1.78071	0.00405221	0.0124174	Up	NA	NA	NA	NA	NA	NA	Unknown protein
Cla97C05G085940	576	1346.88	3860.14	1.51871	4.25e-121	1.75e-118	Up	NA	NA	NA	GO:0006810;GO:0006950;GO:0008150;GO:0009266;GO:0009314;GO:0009408;GO:0009409;GO:0009411;GO:0009416;GO:0009628;GO:0009637;GO:0009639;GO:0009642;GO:0009644;GO:0009889;GO:0009987;GO:0010029;GO:0010030;GO:0010114;GO:0010117;GO:0010218;GO:0010224;GO:0010380;GO:0019222;GO:0031323;GO:0031326;GO:0033554;GO:0034605;GO:0034644;GO:0048518;GO:0048580;GO:0048582;GO:0050789;GO:0050793;GO:0050794;GO:0050896;GO:…	GO:0005575;GO:0005622;GO:0005623;GO:0005737;GO:0009507;GO:0009534;GO:0009535;GO:0009536;GO:0009579;GO:0016020;GO:0031976;GO:0031984;GO:0034357;GO:0042651;GO:0043226;GO:0043227;GO:0043229;GO:0043231;GO:0044422;GO:0044424;GO:0044434;GO:0044435;GO:0044436;GO:0044444;GO:0044446;GO:0044464;GO:0055035;	Early light-induced protein	early light-induced protein 1, chloroplastic
Cla97C05G086420	1716	310.079	675.869	1.12743	4.22e-29	2.65e-27	Up	K09489 HSPA4; heat shock 70kDa protein 4	NA	NA	GO:0000302;GO:0006950;GO:0006979;GO:0008150;GO:0009266;GO:0009314;GO:0009408;GO:0009416;GO:0009628;GO:0009636;GO:0009642;GO:0009644;GO:0010035;GO:0042221;GO:0042493;GO:0042542;GO:0046677;GO:0050896;GO:1901700;	NA	Heat shock 70 kDa protein	Heat shock 70 kDa protein 8
Cla97C05G087080	1005	187.169	385.853	1.04493	6.06e-16	1.45e-14	Up	NA	NA	GO:0003674;GO:0005215;GO:0022857;	GO:0006810;GO:0008150;GO:0051179;GO:0051234;GO:0055085;	GO:0005575;GO:0005623;GO:0005886;GO:0016020;GO:0044464;GO:0071944;	NA	WAT1-related protein
Cla97C05G088050	459	24.1333	64.4823	1.42913	1.42e-05	7.96e-05	Up	NA	NA	NA	NA	NA	NA	Unknown protein
Cla97C05G089070	237	109.12	287.989	1.4001	2.19e-20	7.75e-19	Up	NA	NA	NA	NA	NA	NA	Unknown protein
Cla97C05G089080	213	37.7824	129.04	1.78306	7.26e-13	1.25e-11	Up	NA	NA	NA	NA	NA	NA	Unknown protein
Cla97C05G089300	690	13.1887	27.7778	1.07196	0.0195956	0.0481853	Up	NA	NA	NA	NA	NA	Protein of unknown function (DUF1442)	Protein of unknown function (DUF1442)
Cla97C05G089740	579	3.36798	16.5037	2.25254	0.00402746	0.0123521	Up	NA	NA	GO:0001067;GO:0003674;GO:0003676;GO:0003677;GO:0003700;GO:0005488;GO:0043565;GO:0044212;GO:0097159;GO:0140110;GO:1901363;	GO:0006082;GO:0006355;GO:0006790;GO:0006807;GO:0006950;GO:0006952;GO:0008150;GO:0008152;GO:0009605;GO:0009607;GO:0009620;GO:0009889;GO:0009987;GO:0010468;GO:0010556;GO:0016143;GO:0019219;GO:0019222;GO:0019748;GO:0019757;GO:0019760;GO:0031323;GO:0031326;GO:0043207;GO:0043436;GO:0044237;GO:0044281;GO:0050789;GO:0050794;GO:0050832;GO:0050896;GO:0051171;GO:0051252;GO:0051704;GO:0051707;GO:0060255;GO:…	NA	ethylene-responsive transcription factor	ethylene-responsive transcription factor ERF027
Cla97C05G089920	1212	542.104	1096.49	1.01401	3.83e-32	2.86e-30	Up	K09419 HSFF; heat shock transcription factor, other eukaryote	NA	GO:0003674;GO:0003700;GO:0140110;	GO:0006355;GO:0008150;GO:0009889;GO:0010033;GO:0010200;GO:0010243;GO:0010468;GO:0010556;GO:0019219;GO:0019222;GO:0031323;GO:0031326;GO:0042221;GO:0042493;GO:0050789;GO:0050794;GO:0050896;GO:0051171;GO:0051252;GO:0060255;GO:0065007;GO:0080090;GO:1901698;GO:1901700;GO:1903506;GO:2000112;GO:2001141;GO:0008152;GO:0006139;GO:0006351;GO:0006725;GO:0006807;GO:0009058;GO:0009059;GO:0009987;GO:0010467;GO:…	NA	Heat Stress Transcription Factor	heat stress transcription factor B-2b-like
Cla97C05G090020	399	50.7617	119.384	1.23091	5.49e-08	4.81e-07	Up	K09422 MYBP; transcription factor MYB, plant	NA	GO:0000981;GO:0001067;GO:0001134;GO:0001135;GO:0003674;GO:0003676;GO:0003677;GO:0003700;GO:0005488;GO:0043565;GO:0044212;GO:0097159;GO:0140110;GO:1901363;GO:0005515;GO:0008134;	GO:0001101;GO:0006355;GO:0006357;GO:0007154;GO:0007165;GO:0008150;GO:0009314;GO:0009416;GO:0009628;GO:0009639;GO:0009719;GO:0009725;GO:0009751;GO:0009889;GO:0009891;GO:0009893;GO:0009987;GO:0010017;GO:0010018;GO:0010033;GO:0010218;GO:0010468;GO:0010556;GO:0010557;GO:0010604;GO:0010628;GO:0014070;GO:0019219;GO:0019222;GO:0023052;GO:0030154;GO:0031323;GO:0031325;GO:0031326;GO:0031328;GO:0032502;GO:…	GO:0005575;GO:0005622;GO:0005623;GO:0005634;GO:0043226;GO:0043227;GO:0043229;GO:0043231;GO:0044424;GO:0044464;	Transcription factor	Myb transcription factor
Cla97C05G090030	231	16.863	56.0806	1.74324	1.37e-06	9.37e-06	Up	K09422 MYBP; transcription factor MYB, plant	NA	GO:0000981;GO:0001067;GO:0001134;GO:0001135;GO:0003674;GO:0003676;GO:0003677;GO:0003700;GO:0005488;GO:0043565;GO:0044212;GO:0097159;GO:0140110;GO:1901363;GO:0005515;GO:0008134;	GO:0001101;GO:0006355;GO:0006357;GO:0007154;GO:0007165;GO:0008150;GO:0009314;GO:0009416;GO:0009628;GO:0009639;GO:0009719;GO:0009725;GO:0009751;GO:0009889;GO:0009891;GO:0009893;GO:0009987;GO:0010017;GO:0010018;GO:0010033;GO:0010218;GO:0010468;GO:0010556;GO:0010557;GO:0010604;GO:0010628;GO:0014070;GO:0019219;GO:0019222;GO:0023052;GO:0030154;GO:0031323;GO:0031325;GO:0031326;GO:0031328;GO:0032502;GO:…	GO:0005575;GO:0005622;GO:0005623;GO:0005634;GO:0043226;GO:0043227;GO:0043229;GO:0043231;GO:0044424;GO:0044464;	Transcription factor	Transcription factor LAF1-like isoform X2
Cla97C05G090040	1350	9.11129	36.9799	1.9986	0.000103976	0.000480913	Up	NA	NA	NA	NA	NA	O-glucosyltransferase rumi homolog	O-glucosyltransferase rumi-like protein
Cla97C05G090380	2112	124.138	675.065	2.44285	2.98e-92	9.01e-90	Up	K00521 E1.16.1.7; ferric-chelate reductase [EC:1.16.1.7]	NA	GO:0000293;GO:0003674;GO:0003824;GO:0016491;GO:0016722;GO:0016723;	GO:0008150;GO:0008152;GO:0055114;	NA	Ferric reduction oxidase 4-like	ferric reduction oxidase 4-like
Cla97C05G090390	261	18.6361	60.966	1.70371	1.75e-06	1.16e-05	Up	K01881 PARS, proS; prolyl-tRNA synthetase [EC:6.1.1.15]	ko00970:Aminoacyl-tRNA biosynthesis	NA	NA	NA	NA	Prolyl-tRNA synthetase
Cla97C05G090520	522	12.584	129.607	3.37466	1.29e-26	6.92e-25	Up	NA	NA	NA	NA	NA	NA	Transmembrane protein, putative
Cla97C05G091030	606	12.1228	30.7685	1.33712	0.00266191	0.00861067	Up	NA	NA	NA	NA	NA	NA	Unknown protein
Cla97C05G091500	267	1177.68	2916.29	1.30767	9.03e-132	4.81e-129	Up	K25829 ELOF1, ELF1; transcription elongation factor 1	NA	GO:0000993;GO:0001098;GO:0001099;GO:0003674;GO:0005488;GO:0005515;GO:0019899;GO:0043175;GO:0044877;GO:0070063;	GO:0006139;GO:0006325;GO:0006338;GO:0006351;GO:0006354;GO:0006355;GO:0006366;GO:0006368;GO:0006725;GO:0006807;GO:0006996;GO:0008150;GO:0008152;GO:0009058;GO:0009059;GO:0009889;GO:0009891;GO:0009893;GO:0009987;GO:0010467;GO:0010468;GO:0010556;GO:0010557;GO:0010604;GO:0010628;GO:0016043;GO:0016070;GO:0018130;GO:0019219;GO:0019222;GO:0019438;GO:0031323;GO:0031325;GO:0031326;GO:0031328;GO:0032774;GO:…	GO:0005575;GO:0005622;GO:0005623;GO:0005634;GO:0005654;GO:0008023;GO:0031974;GO:0031981;GO:0032991;GO:0043226;GO:0043227;GO:0043229;GO:0043231;GO:0043233;GO:0044422;GO:0044424;GO:0044428;GO:0044446;GO:0044451;GO:0044464;GO:0070013;	Transcription elongation factor implicated in the maintenance of proper chromatin structure in actively transcribed regions	Transcription elongation factor 1 homolog
Cla97C05G092030	1068	2.88987	22.4542	2.96494	5.43e-05	0.00026721	Up	NA	NA	NA	NA	NA	11S globulin seed storage protein	glutelin type-A 2-like
Cla97C05G093320	462	28.8107	59.9283	1.06728	0.000816677	0.00302794	Up	NA	NA	NA	NA	NA	MLP-like protein	Bet_v_1 domain-containing protein
Cla97C05G093560	321	8.59119	22.7173	1.39073	0.00871717	0.024067	Up	NA	NA	NA	NA	NA	NA	Unknown protein
Cla97C05G094220	465	175.063	532.019	1.60559	3.66e-42	3.84e-40	Up	NA	NA	NA	NA	NA	NA	Unknown protein
Cla97C05G094400	819	18.12	49.9165	1.46463	5.63e-05	0.000276173	Up	NA	NA	NA	NA	NA	Enoyl-(Acyl carrier protein) reductase	NAD(P)-binding Rossmann-fold superfamily protein
Cla97C05G094510	885	19.5101	47.2766	1.27038	0.000512737	0.00200809	Up	NA	NA	NA	NA	NA	Methyltransferase domain	Methyltransf_11 domain-containing protein
Cla97C05G095110	336	63.1539	178.667	1.49895	1.85e-14	3.89e-13	Up	NA	NA	NA	NA	NA	NA	Unknown protein
Cla97C05G095910	2007	8.56956	23.3091	1.43715	0.00978273	0.0265989	Up	NA	NA	NA	NA	GO:0005575;GO:0016020;GO:0031224;GO:0031225;GO:0044425;	COBRA-like protein	COBRA-like protein 10
Cla97C05G097630	459	29.8034	63.2038	1.08579	0.000293165	0.00121716	Up	NA	NA	NA	NA	NA	NA	Unknown protein
Cla97C05G098090	396	46.7455	97.7521	1.06502	1.38e-05	7.75e-05	Up	NA	NA	NA	NA	NA	NA	Chaperone protein DnaJ-like
Cla97C05G098640	414	909.453	2054.52	1.17517	8.24e-64	1.72e-61	Up	K13120 FAM32A; protein FAM32A	NA	NA	NA	NA	FAM32A-like	protein FAM32A-like
Cla97C05G098710	750	22.8506	46.7879	1.03507	0.00287101	0.00921491	Up	NA	NA	GO:0003674;GO:0003824;GO:0004672;GO:0004674;GO:0005488;GO:0005515;GO:0005516;GO:0016301;GO:0016740;GO:0016772;GO:0016773;GO:0140096;	GO:0006464;GO:0006468;GO:0006793;GO:0006796;GO:0006807;GO:0008150;GO:0008152;GO:0009987;GO:0016310;GO:0019538;GO:0036211;GO:0043170;GO:0043412;GO:0044237;GO:0044238;GO:0044260;GO:0044267;GO:0071704;GO:1901564;	GO:0005575;GO:0005623;GO:0005886;GO:0016020;GO:0044464;GO:0071944;	Belongs to the protein kinase superfamily	Protein kinase domain-containing protein
Cla97C05G098800	963	941.155	2179.84	1.21051	1.99e-61	3.98e-59	Up	K00430 E1.11.1.7; peroxidase [EC:1.11.1.7]	ko00940:Phenylpropanoid biosynthesis	NA	NA	NA	Belongs to the peroxidase family. Classical plant (class III) peroxidase subfamily	Peroxidase
Cla97C05G099440	471	4195.82	8792.71	1.06759	9.4e-114	3.52e-111	Up	K13993 HSP20; HSP20 family protein	ko04141:Protein processing in endoplasmic reticulum	NA	NA	GO:0005575;GO:0005622;GO:0005623;GO:0005737;GO:0044424;GO:0044464;	kDa class II heat shock protein-like	17.1 kDa class II heat shock protein-like
Cla97C05G099600	321	32.7464	95.825	1.54833	3.82e-09	4.04e-08	Up	NA	NA	NA	NA	NA	Gibberellin-regulated protein	Gibberellin-regulated family protein
Cla97C05G100280	2484	0.625722	8.40464	3.72571	0.00514014	0.0152716	Up	NA	NA	NA	NA	NA	C1 domain	Cysteine/Histidine-rich C1 domain family protein, putative
Cla97C05G100850	1578	82.5312	967.651	3.55067	2.57e-175	2.47e-172	Up	NA	NA	GO:0003674;GO:0003824;GO:0004497;GO:0016491;GO:0016705;GO:0016709;	GO:0008150;GO:0008152;GO:0009058;GO:0009987;GO:0010035;GO:0010038;GO:0010039;GO:0019748;GO:0042221;GO:0044550;GO:0050896;GO:0051716;GO:0055114;GO:0070887;GO:0071241;GO:0071248;GO:0071281;	GO:0005575;GO:0016020;	Cytochrome p450	Cytochrome P450
Cla97C05G100860	546	2.24315	14.2474	2.6623	0.00110625	0.00396014	Up	NA	NA	GO:0003674;GO:0003824;GO:0004497;GO:0016491;GO:0016705;GO:0016709;	GO:0008150;GO:0008152;GO:0009058;GO:0009987;GO:0010035;GO:0010038;GO:0010039;GO:0019748;GO:0042221;GO:0044550;GO:0050896;GO:0051716;GO:0055114;GO:0070887;GO:0071241;GO:0071248;GO:0071281;	GO:0005575;GO:0016020;	Cytochrome p450	Cytochrome P450
Cla97C05G100870	1554	504.334	1238.01	1.29773	1.38e-58	2.52e-56	Up	NA	NA	GO:0003674;GO:0003824;GO:0004497;GO:0016491;GO:0016705;GO:0016709;	GO:0008150;GO:0008152;GO:0009058;GO:0009987;GO:0010035;GO:0010038;GO:0010039;GO:0019748;GO:0042221;GO:0044550;GO:0050896;GO:0051716;GO:0055114;GO:0070887;GO:0071241;GO:0071248;GO:0071281;	GO:0005575;GO:0016020;	Cytochrome p450	Cytochrome P450
Cla97C05G101240	258	18.3588	38.5288	1.07116	0.00512743	0.0152392	Up	NA	NA	NA	NA	NA	NA	Unknown protein
Cla97C05G103130	633	42.7308	111.568	1.39048	2.49e-08	2.3e-07	Up	NA	NA	NA	NA	NA	NA	glycine-rich cell wall structural protein 2-like
Cla97C05G103160	456	138.11	315.734	1.19476	2.2e-16	5.46e-15	Up	NA	NA	GO:0003674;GO:0005344;GO:0140104;	GO:0006082;GO:0006629;GO:0006631;GO:0006638;GO:0006639;GO:0006641;GO:0006810;GO:0008150;GO:0008152;GO:0008610;GO:0009058;GO:0009987;GO:0015669;GO:0015671;GO:0015893;GO:0019432;GO:0019752;GO:0032787;GO:0042221;GO:0042493;GO:0043436;GO:0044237;GO:0044238;GO:0044249;GO:0044255;GO:0044281;GO:0045017;GO:0046460;GO:0046463;GO:0046486;GO:0050896;GO:0051179;GO:0051234;GO:0071704;GO:1901576;	NA	Belongs to the globin family	non-symbiotic hemoglobin 2
Cla97C05G104890	1047	154.187	337.669	1.13065	1.71e-17	4.69e-16	Up	K09287 RAV; RAV-like factor	NA	GO:0001067;GO:0003674;GO:0003676;GO:0003677;GO:0003700;GO:0005488;GO:0043565;GO:0044212;GO:0097159;GO:0140110;GO:1901363;	GO:0000003;GO:0003006;GO:0006355;GO:0007275;GO:0008150;GO:0009314;GO:0009416;GO:0009628;GO:0009648;GO:0009719;GO:0009725;GO:0009741;GO:0009791;GO:0009889;GO:0009890;GO:0009892;GO:0009909;GO:0009910;GO:0010033;GO:0010228;GO:0010468;GO:0010556;GO:0010558;GO:0010605;GO:0010629;GO:0014070;GO:0019219;GO:0019222;GO:0022414;GO:0022622;GO:0031323;GO:0031324;GO:0031326;GO:0031327;GO:0032501;GO:0032502;GO:…	GO:0005575;GO:0005622;GO:0005623;GO:0005634;GO:0043226;GO:0043227;GO:0043229;GO:0043231;GO:0044424;GO:0044464;	AP2 ERF and B3 domain-containing transcription	AP2/ERF and B3 domain-containing transcription factor RAV1-like
Cla97C05G105210	1173	0.625722	6.57988	3.36543	0.0161395	0.0408432	Up	NA	NA	NA	NA	NA	Protein of unknown function (DUF1262)	Protein of unknown function (DUF1262)
Cla97C05G105560	1461	39.0209	99.3823	1.35	2.75e-07	2.12e-06	Up	NA	NA	GO:0003674;GO:0003824;GO:0004497;GO:0008395;GO:0016491;	GO:0006629;GO:0008150;GO:0008152;GO:0008202;GO:0009719;GO:0009725;GO:0009741;GO:0010033;GO:0010268;GO:0010817;GO:0014070;GO:0016128;GO:0016131;GO:0033993;GO:0042221;GO:0042445;GO:0042592;GO:0044238;GO:0048878;GO:0050896;GO:0055088;GO:0055114;GO:0065007;GO:0065008;GO:0071704;GO:1901360;GO:1901615;GO:1901700;	NA	Cytochrome p450	Cytochrome P450
Cla97C05G105600	525	12.0543	28.7381	1.23643	0.0124471	0.0327352	Up	K25796 YAB; plant-specific transcription factor YABBY family protein	NA	GO:0003674;GO:0003700;GO:0140110;	GO:0000003;GO:0003002;GO:0003006;GO:0006355;GO:0007275;GO:0007389;GO:0008150;GO:0009653;GO:0009791;GO:0009798;GO:0009888;GO:0009889;GO:0009908;GO:0009943;GO:0009944;GO:0009955;GO:0010022;GO:0010073;GO:0010093;GO:0010094;GO:0010254;GO:0010468;GO:0010556;GO:0010582;GO:0019219;GO:0019222;GO:0022414;GO:0031323;GO:0031326;GO:0032501;GO:0032502;GO:0048366;GO:0048367;GO:0048437;GO:0048438;GO:0048440;GO:…	NA	crabs claw	protein CRABS CLAW
Cla97C05G106250	600	259.257	857.285	1.72417	1.92e-53	3.03e-51	Up	NA	NA	GO:0003674;GO:0003824;GO:0004842;GO:0005488;GO:0005515;GO:0016740;GO:0019787;GO:0051787;GO:0061630;GO:0061659;GO:0140096;	GO:0000003;GO:0000209;GO:0000902;GO:0000904;GO:0003006;GO:0006464;GO:0006508;GO:0006511;GO:0006515;GO:0006807;GO:0006950;GO:0007275;GO:0008150;GO:0008152;GO:0009056;GO:0009057;GO:0009653;GO:0009791;GO:0009826;GO:0009888;GO:0009987;GO:0010026;GO:0010033;GO:0010154;GO:0010498;GO:0016043;GO:0016049;GO:0016567;GO:0019538;GO:0019941;GO:0022412;GO:0022414;GO:0030154;GO:0030163;GO:0032446;GO:0032501;GO:…	GO:0005575;GO:0005622;GO:0005623;GO:0005737;GO:0005829;GO:0044424;GO:0044444;GO:0044464;	E3 ubiquitin-protein ligase	RING-type domain-containing protein
Cla97C05G106590	2181	183.305	487.743	1.41111	1.74e-33	1.33e-31	Up	NA	NA	NA	NA	NA	LRR receptor-like serine threonine-protein kinase	Protein kinase domain-containing protein
Cla97C05G107260	1119	64.6552	134.73	1.06027	3.15e-07	2.41e-06	Up	NA	NA	GO:0003674;GO:0005215;GO:0022857;	GO:0002831;GO:0002832;GO:0006810;GO:0007154;GO:0007165;GO:0008150;GO:0009719;GO:0009725;GO:0009733;GO:0009734;GO:0009755;GO:0009987;GO:0010033;GO:0023052;GO:0031347;GO:0031348;GO:0032101;GO:0032102;GO:0032870;GO:0042221;GO:0043900;GO:0043901;GO:0048519;GO:0048583;GO:0048585;GO:0050789;GO:0050794;GO:0050896;GO:0051179;GO:0051234;GO:0051716;GO:0055085;GO:0065007;GO:0070887;GO:0071310;GO:0071365;GO:…	GO:0005575;GO:0005622;GO:0005623;GO:0005737;GO:0005783;GO:0005886;GO:0005887;GO:0005938;GO:0012505;GO:0016020;GO:0016021;GO:0031224;GO:0031226;GO:0043226;GO:0043227;GO:0043229;GO:0043231;GO:0044424;GO:0044425;GO:0044444;GO:0044459;GO:0044464;GO:0071944;GO:0099568;	WAT1-related protein	WAT1-related protein
Cla97C05G108440	705	501.07	2441.93	2.28466	3.98e-245	6.2e-242	Up	K13993 HSP20; HSP20 family protein	ko04141:Protein processing in endoplasmic reticulum	NA	NA	NA	Belongs to the small heat shock protein (HSP20) family	small heat shock protein, chloroplastic-like
Cla97C05G108820	612	29.6601	70.9148	1.26112	4.64e-05	0.000231419	Up	NA	NA	NA	NA	NA	NA	DUF4378 domain-containing protein
Cla97C06G109470	330	6.09323	19.8698	1.71209	0.00386863	0.0119361	Up	K05282 GA20ox; gibberellin-44 dioxygenase [EC:1.14.11.12]	ko00904:Diterpenoid biosynthesis	GO:0003674;GO:0003824;GO:0016491;GO:0016705;GO:0016706;GO:0045544;GO:0051213;	GO:0000003;GO:0000902;GO:0001101;GO:0003006;GO:0006082;GO:0006629;GO:0006720;GO:0006721;GO:0007154;GO:0007165;GO:0007275;GO:0008150;GO:0008152;GO:0008299;GO:0008610;GO:0009058;GO:0009314;GO:0009416;GO:0009628;GO:0009648;GO:0009653;GO:0009685;GO:0009686;GO:0009719;GO:0009725;GO:0009739;GO:0009740;GO:0009755;GO:0009791;GO:0009826;GO:0009908;GO:0009987;GO:0010033;GO:0010228;GO:0010476;GO:0010817;GO:…	GO:0005575;GO:0005622;GO:0005623;GO:0005737;GO:0044424;GO:0044464;	Belongs to the iron ascorbate-dependent oxidoreductase family	gibberellin 20 oxidase 2-like
Cla97C06G109480	873	12.7961	38.0178	1.57861	0.000319624	0.00131541	Up	K05282 GA20ox; gibberellin-44 dioxygenase [EC:1.14.11.12]	ko00904:Diterpenoid biosynthesis	GO:0003674;GO:0003824;GO:0016491;GO:0016705;GO:0016706;GO:0045544;GO:0051213;	GO:0000003;GO:0000902;GO:0001101;GO:0003006;GO:0006082;GO:0006629;GO:0006720;GO:0006721;GO:0007154;GO:0007165;GO:0007275;GO:0008150;GO:0008152;GO:0008299;GO:0008610;GO:0009058;GO:0009314;GO:0009416;GO:0009628;GO:0009648;GO:0009653;GO:0009685;GO:0009686;GO:0009719;GO:0009725;GO:0009739;GO:0009740;GO:0009755;GO:0009791;GO:0009826;GO:0009908;GO:0009987;GO:0010033;GO:0010228;GO:0010476;GO:0010817;GO:…	GO:0005575;GO:0005622;GO:0005623;GO:0005737;GO:0044424;GO:0044464;	Belongs to the iron ascorbate-dependent oxidoreductase family	gibberellin 20 oxidase 2-like
Cla97C06G109690	927	101.93	347.557	1.76955	1.04e-30	7.14e-29	Up	NA	NA	NA	NA	NA	Myelodysplasia-myeloid leukemia factor 1-interacting protein	FUNCTIONS IN: molecular_function unknown; INVOLVED IN: biological_process unknown; LOCATED IN: cellular_component unknown; EXPRESSED IN: inflorescence meristem, flower, cultured cell; EXPRESSED DURING: petal differentiation and expansion stage; BEST Arabidopsis thaliana protein match is: glycine-rich protein .
Cla97C06G110110	534	2.53502	18.9073	2.88679	8.94e-05	0.000418431	Up	NA	NA	NA	NA	GO:0005575;GO:0005576;	invertase	PMEI domain-containing protein
Cla97C06G110850	1605	137.989	377.095	1.44965	2.01e-25	1.03e-23	Up	K25487 CYP81Q58; 19-hydroxycucurbitadienol 25-hydroxylase [EC:1.14.14.-]	ko00996:Biosynthesis of various alkaloids	NA	NA	NA	iron ion binding	Cytochrome P450
Cla97C06G110860	1554	1405.72	3312.09	1.23727	2.26e-121	9.55e-119	Up	K24184 CYP89A; cytochrome P450 family 89 subfamily A [EC:1.14.-.-]	NA	GO:0003674;GO:0003824;GO:0004497;GO:0016491;GO:0016705;GO:0016709;	GO:0008150;GO:0008152;GO:0009058;GO:0019748;GO:0044550;GO:0055114;	GO:0005575;GO:0016020;	Cytochrome p450	Cytochrome P450
Cla97C06G111730	240	59.9036	138.246	1.20162	3.1e-08	2.83e-07	Up	NA	NA	NA	NA	NA	pollen allergen Ole e 6-like	major pollen allergen Ole e 6-like
Cla97C06G112040	492	558.626	1610.91	1.52804	1.57e-99	4.82e-97	Up	K24345 KIC; calcium-binding protein KIC and related proteins	NA	GO:0003674;GO:0005488;GO:0005509;GO:0043167;GO:0043169;GO:0046872;	GO:0000902;GO:0000904;GO:0008150;GO:0009653;GO:0009888;GO:0009987;GO:0010026;GO:0010090;GO:0010091;GO:0016043;GO:0030154;GO:0032502;GO:0032989;GO:0048468;GO:0048856;GO:0048869;GO:0071840;GO:0090558;GO:0090626;	NA	calcium-binding protein	Calcium-binding EF-hand family protein
Cla97C06G112090	1203	17.6901	111.871	2.68062	3.87e-17	1.03e-15	Up	NA	NA	GO:0003674;GO:0003700;GO:0140110;	GO:0000003;GO:0006355;GO:0008150;GO:0009832;GO:0009834;GO:0009889;GO:0009891;GO:0009893;GO:0009900;GO:0009987;GO:0010047;GO:0010468;GO:0010556;GO:0010557;GO:0010604;GO:0010628;GO:0019219;GO:0019222;GO:0022414;GO:0031323;GO:0031325;GO:0031326;GO:0031328;GO:0032501;GO:0032504;GO:0042546;GO:0044085;GO:0045893;GO:0045935;GO:0048518;GO:0048522;GO:0048609;GO:0050789;GO:0050794;GO:0051171;GO:0051173;GO:…	GO:0005575;GO:0016020;	NAC domain-containing protein	NAC domain-containing protein
Cla97C06G112660	375	16.477	161.28	3.27756	9.32e-31	6.42e-29	Up	NA	NA	NA	GO:0000003;GO:0007154;GO:0008150;GO:0009856;GO:0009875;GO:0009987;GO:0022414;GO:0032501;GO:0044706;GO:0051704;	NA	Plant self-incompatibility protein S1	S-protein homolog
Cla97C06G112670	1176	165.504	412.945	1.31596	2.1e-24	1e-22	Up	NA	NA	NA	NA	NA	Belongs to the 'GDSL' lipolytic enzyme family	GDSL esterase/lipase
Cla97C06G112700	3756	1468.76	3974.57	1.43738	1.99e-144	1.34e-141	Up	NA	NA	GO:0003674;GO:0005488;GO:0005515;GO:0005516;	GO:0000003;GO:0000302;GO:0002376;GO:0003006;GO:0006457;GO:0006914;GO:0006950;GO:0006952;GO:0006955;GO:0006979;GO:0007275;GO:0008150;GO:0008152;GO:0009056;GO:0009266;GO:0009314;GO:0009408;GO:0009416;GO:0009605;GO:0009607;GO:0009620;GO:0009628;GO:0009636;GO:0009642;GO:0009644;GO:0009791;GO:0009814;GO:0009817;GO:0009893;GO:0009894;GO:0009896;GO:0009987;GO:0010035;GO:0010228;GO:0010506;GO:0010508;GO:…	GO:0005575;GO:0005911;GO:0009506;GO:0030054;GO:0055044;	BAG family molecular chaperone regulator	BAG family molecular chaperone regulator 6
Cla97C06G113770	996	34.0083	71.3631	1.07157	0.000123158	0.000559908	Up	K18819 GOLS; inositol 3-alpha-galactosyltransferase [EC:2.4.1.123]	ko00052:Galactose metabolism	GO:0003674;GO:0003824;GO:0005488;GO:0005536;GO:0008194;GO:0008378;GO:0008466;GO:0016740;GO:0016757;GO:0016758;GO:0030246;GO:0035250;GO:0035251;GO:0036094;GO:0046527;GO:0047216;GO:0048029;	GO:0000271;GO:0001775;GO:0002252;GO:0002263;GO:0002274;GO:0002275;GO:0002283;GO:0002366;GO:0002376;GO:0002443;GO:0002444;GO:0002446;GO:0005975;GO:0005976;GO:0005977;GO:0005978;GO:0005996;GO:0006012;GO:0006073;GO:0006091;GO:0006112;GO:0006810;GO:0006887;GO:0006955;GO:0008150;GO:0008152;GO:0009058;GO:0009059;GO:0009250;GO:0009987;GO:0015980;GO:0016051;GO:0016192;GO:0019318;GO:0032940;GO:0033692;GO:…	GO:0000323;GO:0005575;GO:0005576;GO:0005622;GO:0005623;GO:0005737;GO:0005764;GO:0005773;GO:0005775;GO:0005829;GO:0012505;GO:0030141;GO:0031410;GO:0031974;GO:0031982;GO:0031983;GO:0034774;GO:0043202;GO:0043226;GO:0043227;GO:0043229;GO:0043231;GO:0043233;GO:0044422;GO:0044424;GO:0044433;GO:0044437;GO:0044444;GO:0044446;GO:0044464;GO:0060205;GO:0070013;GO:0097708;GO:0099503;GO:0101002;GO:1904813;	Belongs to the glycosyltransferase 8 family	Hexosyltransferase
Cla97C06G113900	1014	7.47286	19.9025	1.3999	0.0178122	0.0444645	Up	K00430 E1.11.1.7; peroxidase [EC:1.11.1.7]	ko00940:Phenylpropanoid biosynthesis	NA	NA	NA	Belongs to the peroxidase family. Classical plant (class III) peroxidase subfamily	Peroxidase
Cla97C06G114440	534	149.747	434.436	1.53314	7.67e-30	5.01e-28	Up	NA	NA	NA	NA	NA	NA	Unknown protein
Cla97C06G114460	729	35.2453	71.5035	1.01063	0.000549367	0.00213461	Up	NA	NA	GO:0003674;GO:0003824;GO:0004842;GO:0016740;GO:0019787;GO:0061630;GO:0061659;GO:0140096;	GO:0000209;GO:0006464;GO:0006508;GO:0006511;GO:0006807;GO:0006950;GO:0006952;GO:0007275;GO:0008150;GO:0008152;GO:0009056;GO:0009057;GO:0009987;GO:0010033;GO:0010200;GO:0010243;GO:0010498;GO:0016567;GO:0019538;GO:0019941;GO:0022622;GO:0030163;GO:0032446;GO:0032501;GO:0032502;GO:0036211;GO:0042221;GO:0042493;GO:0043161;GO:0043170;GO:0043412;GO:0043632;GO:0044237;GO:0044238;GO:0044248;GO:0044257;GO:…	GO:0005575;GO:0005623;GO:0005886;GO:0016020;GO:0044464;GO:0071944;	RING-H2 finger protein	RING-H2 finger protein ATL2-like
Cla97C06G115360	744	6055.35	12317.4	1.02402	4.16e-124	1.87e-121	Up	NA	NA	NA	NA	NA	DUF3700	Aluminium induced protein with YGL and LRDR motifs
Cla97C06G115380	333	6.46972	22.5395	1.80942	0.00137442	0.00481117	Up	NA	NA	NA	NA	NA	NA	DUF4218 domain-containing protein
Cla97C06G117290	438	10.7127	27.9034	1.36749	0.00432063	0.0131227	Up	NA	NA	NA	NA	NA	Plant self-incompatibility protein S1	S-protein homolog
Cla97C06G117610	258	55.3222	117.241	1.07714	4.4e-06	2.72e-05	Up	K24544 CYP714C; cytochrome P450 family 714 subfamily C	NA	NA	NA	NA	NA	cytochrome P450 714C2-like
Cla97C06G118030	186	651.974	1404.38	1.10618	1.26e-46	1.53e-44	Up	NA	NA	NA	NA	NA	NA	Unknown protein
Cla97C06G118450	279	314.162	760.949	1.27663	4.48e-35	3.63e-33	Up	K10418 DYNLL; dynein light chain LC8-type	NA	NA	NA	NA	Dynein light chain type 1	Dynein light chain
Cla97C06G119170	699	186.671	559.948	1.58722	2.05e-44	2.32e-42	Up	K25079 RBM42; RNA-binding protein 42	NA	NA	NA	NA	RNA-binding protein	RNA-binding protein 42-like
Cla97C06G119410	444	137.005	436.547	1.66816	3.53e-35	2.91e-33	Up	NA	NA	NA	GO:0008150;GO:0008284;GO:0009719;GO:0009723;GO:0009725;GO:0009733;GO:0009741;GO:0009825;GO:0009987;GO:0010033;GO:0014070;GO:0016049;GO:0032501;GO:0032502;GO:0032870;GO:0033993;GO:0035265;GO:0040007;GO:0040008;GO:0042127;GO:0042221;GO:0045927;GO:0046620;GO:0046622;GO:0048518;GO:0048522;GO:0048589;GO:0048638;GO:0048639;GO:0050789;GO:0050793;GO:0050794;GO:0050896;GO:0051094;GO:0051239;GO:0051240;GO:…	GO:0005575;GO:0005622;GO:0005623;GO:0005634;GO:0005737;GO:0005783;GO:0012505;GO:0016020;GO:0043226;GO:0043227;GO:0043229;GO:0043231;GO:0044424;GO:0044444;GO:0044464;	Protein AUXIN-REGULATED GENE INVOLVED IN ORGAN SIZE-like	Auxin-regulated gene involved in organ size
Cla97C06G119990	381	228.516	490.901	1.10018	2.1e-21	8.2e-20	Up	NA	NA	NA	NA	NA	NA	Unknown protein
Cla97C06G120030	1590	3.9937	18.7418	2.19324	0.00164441	0.00563831	Up	K15639 CYP734A1, BAS1; PHYB activation tagged suppressor 1 [EC:1.14.-.-]	ko00905:Brassinosteroid biosynthesis	GO:0003674;GO:0003824;GO:0004497;GO:0008395;GO:0016491;	GO:0006629;GO:0008150;GO:0008152;GO:0008202;GO:0009719;GO:0009725;GO:0009741;GO:0010033;GO:0010268;GO:0010817;GO:0014070;GO:0016128;GO:0016131;GO:0033993;GO:0042221;GO:0042445;GO:0042592;GO:0044238;GO:0048878;GO:0050896;GO:0055088;GO:0055114;GO:0065007;GO:0065008;GO:0071704;GO:1901360;GO:1901615;GO:1901700;	NA	Cytochrome p450	Cytochrome P450
Cla97C06G120380	426	66.1769	134.317	1.01791	1.1e-06	7.67e-06	Up	NA	NA	NA	NA	NA	NA	Cytochrome P450 family protein
Cla97C06G120450	1254	9.84263	25.2491	1.34915	0.00657047	0.0188821	Up	K15014 SLC29A1_2_3, ENT1_2_3; solute carrier family 29 (equilibrative nucleoside transporter), member 1/2/3	NA	NA	NA	NA	Equilibrative nucleotide transporter	equilibrative nucleotide transporter 8
Cla97C06G121400	555	265.12	548.007	1.0459	1.19e-21	4.72e-20	Up	K03098 APOD; apolipoprotein D and lipocalin family protein	NA	NA	NA	GO:0005575;GO:0005623;GO:0009279;GO:0016020;GO:0019867;GO:0030312;GO:0030313;GO:0031975;GO:0044462;GO:0044464;GO:0071944;	Belongs to the calycin superfamily. Lipocalin family	temperature-induced lipocalin-1
Cla97C06G121690	1380	515.808	1155.65	1.16212	1.98e-47	2.44e-45	Up	K16297 SCPL-II; serine carboxypeptidase-like clade II [EC:3.4.16.-]	NA	GO:0003674;GO:0003824;GO:0004180;GO:0004185;GO:0008233;GO:0008236;GO:0008238;GO:0016787;GO:0017171;GO:0070008;GO:0070011;GO:0140096;	GO:0006508;GO:0006807;GO:0007154;GO:0007165;GO:0008150;GO:0008152;GO:0009056;GO:0009057;GO:0009719;GO:0009725;GO:0009741;GO:0009742;GO:0009755;GO:0009987;GO:0010033;GO:0014070;GO:0019538;GO:0023052;GO:0030163;GO:0032870;GO:0033993;GO:0042221;GO:0043170;GO:0043401;GO:0044237;GO:0044238;GO:0044248;GO:0044257;GO:0044260;GO:0044265;GO:0044267;GO:0048545;GO:0050789;GO:0050794;GO:0050896;GO:0051603;GO:…	GO:0005575;GO:0005576;GO:0005615;GO:0044421;	Belongs to the peptidase S10 family	Carboxypeptidase
Cla97C06G121760	327	18.2049	51.9239	1.50851	6.47e-05	0.000313391	Up	NA	NA	NA	NA	NA	NA	Unknown protein
Cla97C06G122350	342	84.4887	184.575	1.12295	2e-09	2.19e-08	Up	NA	NA	NA	NA	GO:0005575;GO:0005576;	Potato inhibitor I family	Serine proteinase inhibitor
Cla97C06G122930	2862	95.0562	232.1	1.287	3.2e-14	6.46e-13	Up	K01535 PMA1, PMA2; H+-transporting ATPase [EC:7.1.2.1]	ko00190:Oxidative phosphorylation	NA	NA	GO:0005575;GO:0005623;GO:0005886;GO:0016020;GO:0044464;GO:0071944;	Plasma membrane ATPase	Plasma membrane ATPase
Cla97C06G123440	738	915.349	2459.75	1.42583	8.41e-128	4.15e-125	Up	NA	NA	NA	NA	NA	NA	STE20-like serine/threonine-protein kinase
Cla97C06G125470	378	1145.65	2381.77	1.05537	1.02e-72	2.51e-70	Up	K16904 DCTPP1; dCTP diphosphatase [EC:3.6.1.12]	ko00240:Pyrimidine metabolism	NA	NA	NA	dCTP pyrophosphatase 1-like	dCTP pyrophosphatase 1
Cla97C06G125540	534	16.9121	36.8994	1.12071	0.00607522	0.0176467	Up	NA	NA	NA	NA	NA	NA	Unknown protein
Cla97C06G126740	351	103.198	265.438	1.36232	5.76e-18	1.66e-16	Up	NA	NA	GO:0003674;GO:0003700;GO:0140110;	GO:0006355;GO:0008150;GO:0009888;GO:0009889;GO:0010073;GO:0010468;GO:0010556;GO:0019219;GO:0019222;GO:0031323;GO:0031326;GO:0032501;GO:0032502;GO:0048507;GO:0048856;GO:0050789;GO:0050794;GO:0051171;GO:0051252;GO:0060255;GO:0065007;GO:0080090;GO:1903506;GO:2000112;GO:2001141;GO:0008152;GO:0006139;GO:0006351;GO:0006725;GO:0006807;GO:0009058;GO:0009059;GO:0009987;GO:0010467;GO:0016070;GO:0018130;GO:…	GO:0005575;GO:0005622;GO:0005623;GO:0005634;GO:0043226;GO:0043227;GO:0043229;GO:0043231;GO:0044424;GO:0044464;	Homeobox protein knotted-1-like	Homeobox protein knotted-1, putative
Cla97C06G127640	222	260.427	528.221	1.01784	1.5e-18	4.53e-17	Up	NA	NA	NA	NA	NA	NA	Unknown protein
Cla97C06G127780	1062	363.64	728.332	1.00258	9.89e-28	5.72e-26	Up	NA	NA	NA	NA	NA	Heavy-metal-associated domain	heavy metal-associated isoprenylated plant protein 3
Cla97C06G127800	357	129.707	280.889	1.11448	2.92e-14	5.94e-13	Up	K17279 REEP5_6; receptor expression-enhancing protein 5/6	NA	NA	GO:0000003;GO:0001101;GO:0003006;GO:0006950;GO:0006970;GO:0006972;GO:0007275;GO:0008150;GO:0009266;GO:0009409;GO:0009414;GO:0009415;GO:0009555;GO:0009628;GO:0009651;GO:0009719;GO:0009725;GO:0009737;GO:0009791;GO:0009892;GO:0009894;GO:0009895;GO:0009908;GO:0010033;GO:0010035;GO:0010506;GO:0010507;GO:0019222;GO:0022414;GO:0031323;GO:0031324;GO:0031329;GO:0031330;GO:0032501;GO:0032502;GO:0033993;GO:…	NA	HVA22-like protein	HVA22-like protein
Cla97C07G128720	948	51.1691	117.266	1.19175	2.52e-07	1.96e-06	Up	K08099 E3.1.1.14; chlorophyllase [EC:3.1.1.14]	ko00860:Porphyrin metabolism	GO:0003674;GO:0003824;GO:0016787;GO:0016788;GO:0047746;GO:0052689;	GO:0006725;GO:0006778;GO:0006787;GO:0006807;GO:0006950;GO:0006952;GO:0008150;GO:0008152;GO:0009056;GO:0009605;GO:0009607;GO:0009617;GO:0009620;GO:0009987;GO:0015994;GO:0015996;GO:0019439;GO:0033013;GO:0033015;GO:0034641;GO:0042440;GO:0042742;GO:0043207;GO:0044237;GO:0044248;GO:0044270;GO:0046149;GO:0046483;GO:0046700;GO:0050832;GO:0050896;GO:0051186;GO:0051187;GO:0051704;GO:0051707;GO:0071704;GO:…	GO:0005575;GO:0005622;GO:0005623;GO:0005737;GO:0005773;GO:0043226;GO:0043227;GO:0043229;GO:0043231;GO:0044424;GO:0044444;GO:0044464;	Chlorophyllase-1-like	Chlorophyllase
Cla97C07G130240	228	30.5928	186.754	2.61504	3.34e-31	2.37e-29	Up	NA	NA	NA	NA	NA	NA	Unknown protein
Cla97C07G130250	1134	84.6305	222.08	1.38663	4.72e-13	8.35e-12	Up	NA	NA	NA	NA	NA	Zinc finger, C3HC4 type (RING finger)	RING-type domain-containing protein
Cla97C07G130340	345	1590.72	7803.89	2.2935	0	0	Up	NA	NA	NA	NA	NA	NA	Seed nucellus-specific protein
Cla97C07G130360	351	898.812	3414.92	1.92404	8.19e-165	6.91e-162	Up	NA	NA	NA	NA	NA	NA	Seed nucellus-specific protein
Cla97C07G131030	948	16.7898	38.4637	1.19408	0.0035461	0.0110556	Up	K00430 E1.11.1.7; peroxidase [EC:1.11.1.7]	ko00940:Phenylpropanoid biosynthesis	NA	GO:0006725;GO:0008150;GO:0008152;GO:0009058;GO:0009698;GO:0009699;GO:0009808;GO:0009809;GO:0009888;GO:0009889;GO:0009891;GO:0009893;GO:0009987;GO:0010087;GO:0010089;GO:0019222;GO:0019438;GO:0019748;GO:0031323;GO:0031325;GO:0031326;GO:0031328;GO:0032502;GO:0043455;GO:0044237;GO:0044249;GO:0044550;GO:0048518;GO:0048522;GO:0048856;GO:0050789;GO:0050794;GO:0065007;GO:0071704;GO:1900376;GO:1900378;GO:…	GO:0005575;GO:0005576;GO:0005618;GO:0005622;GO:0005623;GO:0005737;GO:0005794;GO:0005829;GO:0012505;GO:0030312;GO:0043226;GO:0043227;GO:0043229;GO:0043231;GO:0044424;GO:0044444;GO:0044464;GO:0048046;GO:0071944;	Belongs to the peroxidase family. Classical plant (class III) peroxidase subfamily	Peroxidase
Cla97C07G132150	480	849.119	6126.07	2.85154	0	0	Up	K13993 HSP20; HSP20 family protein	ko04141:Protein processing in endoplasmic reticulum	NA	NA	NA	Belongs to the small heat shock protein (HSP20) family	17.8 kDa class I heat shock protein-like
Cla97C07G132180	465	28.4343	131.146	2.21277	1.21e-18	3.72e-17	Up	K13993 HSP20; HSP20 family protein	ko04141:Protein processing in endoplasmic reticulum	NA	NA	NA	Belongs to the small heat shock protein (HSP20) family	17.8 kDa class I heat shock protein-like
Cla97C07G132190	480	2002.01	4588.45	1.19694	3.12e-124	1.43e-121	Up	K13993 HSP20; HSP20 family protein	ko04141:Protein processing in endoplasmic reticulum	NA	NA	NA	Belongs to the small heat shock protein (HSP20) family	17.8 kDa class I heat shock protein-like
Cla97C07G132200	315	7.3978	28.4423	1.94594	0.000138999	0.000623664	Up	NA	NA	NA	NA	NA	NA	Unknown protein
Cla97C07G132220	480	855.135	2254.92	1.39874	4.64e-111	1.59e-108	Up	K13993 HSP20; HSP20 family protein	ko04141:Protein processing in endoplasmic reticulum	NA	NA	NA	Belongs to the small heat shock protein (HSP20) family	17.8 kDa class I heat shock protein-like
Cla97C07G132280	480	555.286	1474.12	1.40778	1.12e-77	2.86e-75	Up	K13993 HSP20; HSP20 family protein	ko04141:Protein processing in endoplasmic reticulum	NA	NA	NA	Belongs to the small heat shock protein (HSP20) family	17.8 kDa class I heat shock protein-like
Cla97C07G132300	480	2012.84	4635.88	1.20415	1.16e-125	5.47e-123	Up	K13993 HSP20; HSP20 family protein	ko04141:Protein processing in endoplasmic reticulum	NA	NA	NA	Belongs to the small heat shock protein (HSP20) family	17.8 kDa class I heat shock protein-like
Cla97C07G132310	465	25.1833	132.459	2.40259	4.6e-20	1.59e-18	Up	K13993 HSP20; HSP20 family protein	ko04141:Protein processing in endoplasmic reticulum	NA	NA	NA	Belongs to the small heat shock protein (HSP20) family	17.8 kDa class I heat shock protein-like
Cla97C07G132660	1794	3109.91	7409.92	1.25279	9.03e-215	1.22e-211	Up	K05857 PLCD; phosphatidylinositol phospholipase C, delta [EC:3.1.4.11]	ko00562:Inositol phosphate metabolism|ko04070:Phosphatidylinositol signaling system	GO:0003674;GO:0003824;GO:0004620;GO:0004629;GO:0008081;GO:0016298;GO:0016787;GO:0016788;GO:0042578;	GO:0000003;GO:0003006;GO:0006950;GO:0006952;GO:0007049;GO:0007275;GO:0008150;GO:0009553;GO:0009555;GO:0009556;GO:0009605;GO:0009607;GO:0009617;GO:0009791;GO:0009889;GO:0009891;GO:0009893;GO:0009908;GO:0009987;GO:0010600;GO:0010601;GO:0010817;GO:0019222;GO:0019953;GO:0022402;GO:0022414;GO:0031323;GO:0031325;GO:0031326;GO:0031328;GO:0032350;GO:0032352;GO:0032501;GO:0032502;GO:0034293;GO:0042742;GO:…	GO:0005575;GO:0005623;GO:0005886;GO:0016020;GO:0044464;GO:0071944;	Phosphoinositide phospholipase C	Phosphoinositide phospholipase C
Cla97C07G132790	1137	7.63654	19.4363	1.34466	0.0156093	0.0397	Up	K17506 PPM1L, PP2CE; protein phosphatase 1L [EC:3.1.3.16]	NA	GO:0003674;GO:0003824;GO:0004721;GO:0004722;GO:0016787;GO:0016788;GO:0016791;GO:0042578;GO:0140096;	GO:0001101;GO:0006464;GO:0006470;GO:0006793;GO:0006796;GO:0006807;GO:0007154;GO:0007165;GO:0007275;GO:0008150;GO:0008152;GO:0009719;GO:0009725;GO:0009737;GO:0009738;GO:0009755;GO:0009791;GO:0009888;GO:0009987;GO:0010033;GO:0010374;GO:0010440;GO:0016311;GO:0019538;GO:0023052;GO:0032501;GO:0032502;GO:0032870;GO:0033993;GO:0036211;GO:0042221;GO:0043170;GO:0043412;GO:0044237;GO:0044238;GO:0044260;GO:…	GO:0005575;GO:0005622;GO:0005623;GO:0005634;GO:0043226;GO:0043227;GO:0043229;GO:0043231;GO:0044424;GO:0044464;	phosphatase 2C	Protein-serine/threonine phosphatase
Cla97C07G133710	1131	14.8697	57.1555	1.94988	1.28e-07	1.05e-06	Up	NA	NA	NA	NA	NA	S-adenosylmethionine-dependent methyltransferase	S-adenosyl-L-methionine-dependent methyltransferases superfamily protein
Cla97C07G134180	384	3.2188	13.7386	2.0963	0.00549878	0.0161884	Up	NA	NA	NA	NA	NA	leucine-rich repeat extensin-like protein	acrosin-like
Cla97C07G134890	573	40.9225	89.3052	1.12841	1.37e-05	7.7e-05	Up	NA	NA	NA	NA	NA	Dirigent proteins impart stereoselectivity on the phenoxy radical-coupling reaction, yielding optically active lignans from two molecules of coniferyl alcohol in the biosynthesis of lignans, flavonolignans, and alkaloids and thus plays a central role in plant secondary metabolism	Dirigent protein
Cla97C07G135790	1002	108.378	408.205	1.91569	2.73e-44	3.05e-42	Up	K00430 E1.11.1.7; peroxidase [EC:1.11.1.7]	ko00940:Phenylpropanoid biosynthesis	GO:0003674;GO:0003824;GO:0004601;GO:0016209;GO:0016491;GO:0016684;	GO:0000003;GO:0003006;GO:0005975;GO:0005976;GO:0006725;GO:0007275;GO:0008150;GO:0008152;GO:0009056;GO:0009058;GO:0009636;GO:0009698;GO:0009699;GO:0009791;GO:0009808;GO:0009809;GO:0009845;GO:0009987;GO:0010154;GO:0010383;GO:0016998;GO:0019438;GO:0019748;GO:0022414;GO:0032501;GO:0032502;GO:0032504;GO:0042221;GO:0043170;GO:0044036;GO:0044237;GO:0044238;GO:0044248;GO:0044249;GO:0044260;GO:0044347;GO:…	GO:0005575;GO:0005618;GO:0005623;GO:0009505;GO:0030312;GO:0044464;GO:0071944;	Belongs to the peroxidase family. Classical plant (class III) peroxidase subfamily	Peroxidase
Cla97C07G136010	1164	55.2375	120.529	1.11956	7.8e-07	5.55e-06	Up	NA	NA	NA	NA	NA	f-box protein	F-box protein
Cla97C07G136680	1248	34.5059	95.7603	1.4728	2.29e-07	1.79e-06	Up	NA	NA	GO:0003674;GO:0003824;GO:0008374;GO:0016407;GO:0016413;GO:0016740;GO:0016746;GO:0016747;GO:1990538;	GO:0000271;GO:0005975;GO:0005976;GO:0008150;GO:0008152;GO:0009058;GO:0009059;GO:0009987;GO:0010383;GO:0010410;GO:0016051;GO:0033692;GO:0034637;GO:0034645;GO:0042546;GO:0043170;GO:0044036;GO:0044038;GO:0044085;GO:0044237;GO:0044238;GO:0044249;GO:0044260;GO:0044262;GO:0044264;GO:0045491;GO:0045492;GO:0070589;GO:0070592;GO:0071554;GO:0071704;GO:0071840;GO:1901576;	GO:0005575;GO:0005622;GO:0005623;GO:0005737;GO:0005794;GO:0012505;GO:0043226;GO:0043227;GO:0043229;GO:0043231;GO:0044424;GO:0044444;GO:0044464;	Protein trichome birefringence-like 31	protein trichome birefringence-like 31
Cla97C07G137950	1347	11.7785	29.8533	1.33256	0.00401745	0.0123315	Up	NA	NA	GO:0003674;GO:0003824;GO:0016740;GO:0016746;GO:0016747;GO:0050734;	GO:0000271;GO:0005975;GO:0005976;GO:0006725;GO:0008150;GO:0008152;GO:0009058;GO:0009059;GO:0009664;GO:0009698;GO:0009699;GO:0009832;GO:0009987;GO:0010345;GO:0010383;GO:0010393;GO:0016043;GO:0016051;GO:0017144;GO:0019438;GO:0019748;GO:0033692;GO:0034637;GO:0034645;GO:0042546;GO:0043170;GO:0044036;GO:0044038;GO:0044085;GO:0044237;GO:0044238;GO:0044249;GO:0044260;GO:0044262;GO:0044264;GO:0044550;GO:…	NA	Anthranilate N-benzoyltransferase protein	HXXXD-type acyl-transferase family protein
Cla97C07G138230	600	398.848	848.973	1.09008	1.15e-28	7.12e-27	Up	NA	NA	NA	NA	NA	Domain of unknown function (DUF4228)	UvrABC system protein C
Cla97C07G139570	342	241.599	615.973	1.34676	5.2e-36	4.5e-34	Up	NA	NA	NA	NA	NA	Domain of unknown function (DUF4666)	MAPK kinase substrate protein At1g80180-like
Cla97C07G139950	2316	290.371	602.11	1.05331	1.08e-24	5.23e-23	Up	K09338 HD-ZIP; homeobox-leucine zipper protein	NA	NA	NA	NA	Homeobox-leucine zipper protein GLABRA	homeobox-leucine zipper protein GLABRA 2-like
Cla97C07G140040	621	142.236	553.637	1.95544	3.41e-53	5.27e-51	Up	NA	NA	NA	NA	NA	Ribonuclease H protein	Avr9/Cf-9 rapidly elicited protein
Cla97C07G140060	969	188.531	517.812	1.45626	3.54e-27	1.99e-25	Up	NA	NA	GO:0000976;GO:0000977;GO:0000981;GO:0001012;GO:0001067;GO:0001085;GO:0001228;GO:0003674;GO:0003676;GO:0003677;GO:0003682;GO:0003690;GO:0003700;GO:0005488;GO:0005515;GO:0008134;GO:0043565;GO:0044212;GO:0097159;GO:0140110;GO:1901363;GO:1990837;	GO:0006139;GO:0006351;GO:0006355;GO:0006357;GO:0006366;GO:0006725;GO:0006807;GO:0007623;GO:0008150;GO:0008152;GO:0009058;GO:0009059;GO:0009314;GO:0009416;GO:0009628;GO:0009889;GO:0009891;GO:0009893;GO:0009987;GO:0010467;GO:0010468;GO:0010556;GO:0010557;GO:0010604;GO:0010628;GO:0016070;GO:0018130;GO:0019219;GO:0019222;GO:0019438;GO:0030154;GO:0031323;GO:0031325;GO:0031326;GO:0031328;GO:0032502;GO:…	GO:0005575;GO:0005622;GO:0005623;GO:0005634;GO:0005667;GO:0032991;GO:0043226;GO:0043227;GO:0043229;GO:0043231;GO:0044424;GO:0044464;	Transcriptional activator that specifically binds 5'- GATA-3' or 5'-GAT-3' motifs within gene promoters	GATA transcription factor
Cla97C07G140090	612	62.114	253.296	2.03405	4.36e-25	2.18e-23	Up	K09286 EREBP; EREBP-like factor	NA	GO:0003674;GO:0003700;GO:0140110;	GO:0006355;GO:0008150;GO:0009889;GO:0010468;GO:0010556;GO:0019219;GO:0019222;GO:0031323;GO:0031326;GO:0050789;GO:0050794;GO:0051171;GO:0051252;GO:0060255;GO:0065007;GO:0080090;GO:1903506;GO:2000112;GO:2001141;GO:0008152;GO:0006139;GO:0006351;GO:0006725;GO:0006807;GO:0009058;GO:0009059;GO:0009987;GO:0010467;GO:0016070;GO:0018130;GO:0019438;GO:0032774;GO:0034641;GO:0034645;GO:0034654;GO:0043170;GO:…	NA	ethylene-responsive transcription factor	ethylene-responsive transcription factor TINY
Cla97C07G140340	762	8.29932	21.8425	1.39476	0.00856713	0.023711	Up	NA	NA	GO:0003674;GO:0003700;GO:0140110;	GO:0006355;GO:0008150;GO:0009889;GO:0010468;GO:0010556;GO:0019219;GO:0019222;GO:0031323;GO:0031326;GO:0048580;GO:0048583;GO:0048586;GO:0048587;GO:0050789;GO:0050793;GO:0050794;GO:0051171;GO:0051239;GO:0051252;GO:0060255;GO:0065007;GO:0080090;GO:1903506;GO:2000026;GO:2000028;GO:2000112;GO:2000241;GO:2001141;GO:0008152;GO:0006139;GO:0006351;GO:0006725;GO:0006807;GO:0009058;GO:0009059;GO:0009987;GO:…	GO:0005575;GO:0005622;GO:0005623;GO:0005634;GO:0043226;GO:0043227;GO:0043229;GO:0043231;GO:0044424;GO:0044464;	Transcription factor	transcription factor bHLH87-like
Cla97C07G140380	1458	40.3292	149.414	1.89055	4.03e-16	9.74e-15	Up	NA	NA	NA	NA	NA	F-Box protein	F-box domain-containing protein
Cla97C07G140960	1536	122.6	245.549	1.00315	1.15e-10	1.5e-09	Up	K20623 CYP92A6; typhasterol/6-deoxotyphasterol 2alpha-hydroxylase	ko00905:Brassinosteroid biosynthesis	NA	NA	GO:0005575;GO:0005622;GO:0005623;GO:0005737;GO:0005783;GO:0005789;GO:0012505;GO:0016020;GO:0031090;GO:0031984;GO:0042175;GO:0043226;GO:0043227;GO:0043229;GO:0043231;GO:0044422;GO:0044424;GO:0044425;GO:0044432;GO:0044444;GO:0044446;GO:0044464;GO:0098827;	Cytochrome p450	cytochrome P450 71A1-like
Cla97C07G141230	399	6.6714	33.4629	2.32002	5.04e-06	3.08e-05	Up	NA	NA	NA	NA	NA	NA	Unknown protein
Cla97C07G142350	1305	141.146	1472.07	3.38283	3.41e-212	4.05e-209	Up	NA	NA	NA	GO:0006457;GO:0008150;GO:0009266;GO:0009605;GO:0009607;GO:0009628;GO:0009987;GO:0043207;GO:0050896;	GO:0005575;GO:0005911;GO:0009506;GO:0030054;GO:0055044;	BAG family molecular chaperone regulator	BAG family molecular chaperone regulator 6-like
Cla97C07G143690	1503	483.078	999.162	1.04869	1.07e-36	9.47e-35	Up	NA	NA	GO:0003674;GO:0003824;GO:0008194;GO:0016740;GO:0016757;GO:0016758;GO:0035251;GO:0046527;GO:0080043;GO:0080044;	NA	GO:0005575;GO:0005622;GO:0005623;GO:0043226;GO:0043227;GO:0043229;GO:0043231;GO:0044424;GO:0044464;	Belongs to the UDP-glycosyltransferase family	Glycosyltransferase
Cla97C07G144250	1104	36.9504	151.246	2.04275	1.2e-18	3.67e-17	Up	K22684 MCA1; metacaspase-1 [EC:3.4.22.-]	NA	NA	GO:0008150;GO:0010941;GO:0043067;GO:0043069;GO:0048519;GO:0048523;GO:0050789;GO:0050794;GO:0060548;GO:0065007;GO:0008219;GO:0009987;GO:0012501;	NA	Metacaspase-1-like	metacaspase-1-like
Cla97C08G144800	519	3.83402	14.9217	1.95344	0.00610141	0.0177177	Up	K02132 ATPeF1A, ATP5A1, ATP1; F-type H+-transporting ATPase subunit alpha	ko00190:Oxidative phosphorylation	NA	NA	NA	ATP synthase subunit alpha	ATP synthase subunit alpha
Cla97C08G145240	387	1.25144	12.2975	3.27269	0.00144267	0.00502144	Up	NA	NA	NA	NA	NA	NA	Unknown protein
Cla97C08G145950	567	11.0987	196.659	4.16953	1.89e-42	1.99e-40	Up	K13993 HSP20; HSP20 family protein	ko04141:Protein processing in endoplasmic reticulum	NA	GO:0006950;GO:0008150;GO:0009266;GO:0009408;GO:0009628;GO:0050896;	GO:0005575;GO:0005622;GO:0005623;GO:0005737;GO:0005783;GO:0012505;GO:0043226;GO:0043227;GO:0043229;GO:0043231;GO:0044424;GO:0044444;GO:0044464;	Belongs to the small heat shock protein (HSP20) family	22.0 kDa class IV heat shock protein
Cla97C08G146010	432	185.783	530.243	1.51181	2.02e-39	1.94e-37	Up	NA	NA	NA	NA	NA	NA	keratin, type II cytoskeletal 3 isoform X1
Cla97C08G147460	1641	323.411	1105.38	1.76949	4.26e-87	1.27e-84	Up	NA	NA	NA	GO:0001906;GO:0008150;GO:0031640;GO:0035821;GO:0044364;GO:0044419;GO:0051704;	GO:0005575;GO:0005622;GO:0005623;GO:0005737;GO:0005783;GO:0012505;GO:0043226;GO:0043227;GO:0043229;GO:0043231;GO:0044424;GO:0044444;GO:0044464;	Encoded by	rRNA N-glycosidase
Cla97C08G147870	381	5.89093	18.6366	1.67716	0.0143483	0.0369431	Up	NA	NA	NA	NA	NA	NA	Unknown protein
Cla97C08G148020	165	2.63014	12.453	2.27123	0.0059272	0.0172688	Up	NA	NA	NA	NA	NA	NA	Unknown protein
Cla97C08G148620	891	57.2889	125.814	1.13508	1.47e-07	1.2e-06	Up	NA	NA	NA	NA	NA	No apical meristem (NAM) protein	NAC domain-containing protein
Cla97C08G149220	1197	464.815	1124.92	1.27495	1.14e-56	1.97e-54	Up	K03921 FAB2, SSI2, desA1; acyl-[acyl-carrier-protein] desaturase [EC:1.14.19.2 1.14.19.11 1.14.19.26]	ko00061:Fatty acid biosynthesis|ko01040:Biosynthesis of unsaturated fatty acids	NA	NA	GO:0005575;GO:0016020;	Introduction of a cis double bond between carbons of the acyl chain	Acyl-[acyl-carrier-protein] desaturase
Cla97C08G152050	1011	28.4398	59.5441	1.06755	0.000695132	0.00262099	Up	NA	NA	NA	NA	NA	Protein CUP-SHAPED COTYLEDON	NAC domain-containing protein
Cla97C08G155110	231	26.0753	59.0052	1.16871	0.000368579	0.0014956	Up	NA	NA	NA	NA	NA	NA	Unknown protein
Cla97C08G155900	201	88.0784	263.63	1.57773	1.92e-18	5.74e-17	Up	NA	NA	NA	NA	NA	NA	Methionyl-tRNA synthetase
Cla97C08G158300	699	19.2118	59.6445	1.64725	2.89e-06	1.84e-05	Up	NA	NA	NA	NA	NA	Transmembrane protein 136	TLC domain-containing protein
Cla97C08G158700	348	64.8609	139.908	1.10503	4.13e-07	3.11e-06	Up	NA	NA	NA	NA	NA	NA	Zinc finger and BTB domain-containing protein 47
Cla97C08G159060	1218	20.4172	46.4897	1.17949	0.00100571	0.00364598	Up	NA	NA	GO:0000166;GO:0003674;GO:0003824;GO:0004672;GO:0004674;GO:0004683;GO:0005488;GO:0005515;GO:0005524;GO:0008092;GO:0008144;GO:0016301;GO:0016740;GO:0016772;GO:0016773;GO:0016905;GO:0017022;GO:0017076;GO:0030554;GO:0032553;GO:0032555;GO:0032559;GO:0035639;GO:0036094;GO:0043167;GO:0043168;GO:0045159;GO:0097159;GO:0097367;GO:0140096;GO:1901265;GO:1901363;	GO:0000003;GO:0000278;GO:0000281;GO:0000910;GO:0006464;GO:0006468;GO:0006793;GO:0006796;GO:0006807;GO:0006996;GO:0007010;GO:0007049;GO:0008150;GO:0008152;GO:0009846;GO:0009856;GO:0009987;GO:0016043;GO:0016310;GO:0018107;GO:0018193;GO:0018210;GO:0019538;GO:0022402;GO:0022411;GO:0022414;GO:0030029;GO:0030036;GO:0031033;GO:0031035;GO:0031037;GO:0031038;GO:0032501;GO:0032984;GO:0036211;GO:0043170;GO:…	GO:0005575;GO:0005622;GO:0005623;GO:0005634;GO:0005737;GO:0005826;GO:0005856;GO:0005938;GO:0015629;GO:0030863;GO:0030864;GO:0032153;GO:0032155;GO:0043226;GO:0043227;GO:0043228;GO:0043229;GO:0043231;GO:0043232;GO:0044422;GO:0044424;GO:0044430;GO:0044444;GO:0044446;GO:0044448;GO:0044464;GO:0070938;GO:0071944;GO:0099568;	Vegetative incompatibility protein	Transducin/WD40 repeat-like superfamily protein
Cla97C08G159210	690	109.459	252.659	1.20604	2.08e-12	3.39e-11	Up	NA	NA	GO:0000981;GO:0001067;GO:0001134;GO:0001135;GO:0003674;GO:0003676;GO:0003677;GO:0003700;GO:0005488;GO:0043565;GO:0044212;GO:0097159;GO:0140110;GO:1901363;GO:0005515;GO:0008134;	GO:0001101;GO:0006355;GO:0006357;GO:0006950;GO:0006952;GO:0006970;GO:0008150;GO:0009414;GO:0009415;GO:0009605;GO:0009607;GO:0009617;GO:0009620;GO:0009628;GO:0009651;GO:0009719;GO:0009723;GO:0009725;GO:0009733;GO:0009737;GO:0009739;GO:0009751;GO:0009753;GO:0009889;GO:0009966;GO:0009967;GO:0009987;GO:0010033;GO:0010035;GO:0010038;GO:0010200;GO:0010243;GO:0010468;GO:0010556;GO:0010646;GO:0010647;GO:…	GO:0005575;GO:0005622;GO:0005623;GO:0005634;GO:0043226;GO:0043227;GO:0043229;GO:0043231;GO:0044424;GO:0044464;	transcription factor	transcription factor MYB44-like
Cla97C08G159420	264	20.8577	66.2164	1.65187	1.43e-06	9.67e-06	Up	NA	NA	NA	NA	NA	EF-hand domain	calmodulin-like
Cla97C08G159430	489	145.911	529.407	1.85384	3.52e-49	4.65e-47	Up	NA	NA	NA	NA	NA	NA	zinc transporter 7-like
Cla97C08G159440	408	5.81837	31.2022	2.39025	3.83e-05	0.000195228	Up	NA	NA	GO:0003674;GO:0005488;GO:0005509;GO:0043167;GO:0043169;GO:0046872;	NA	GO:0005575;GO:0005622;GO:0005623;GO:0005737;GO:0005773;GO:0005886;GO:0016020;GO:0043226;GO:0043227;GO:0043229;GO:0043231;GO:0044424;GO:0044444;GO:0044464;GO:0071944;	calcium-binding protein	calmodulin-like
Cla97C08G159740	693	746.518	1511.29	1.01772	9.58e-42	9.95e-40	Up	NA	NA	NA	GO:0000003;GO:0003006;GO:0007154;GO:0007165;GO:0007275;GO:0008150;GO:0009790;GO:0009791;GO:0009793;GO:0009888;GO:0009987;GO:0010065;GO:0010067;GO:0010087;GO:0010154;GO:0022414;GO:0023052;GO:0032501;GO:0032502;GO:0048316;GO:0048507;GO:0048508;GO:0048608;GO:0048731;GO:0048856;GO:0050789;GO:0050794;GO:0050896;GO:0051301;GO:0051716;GO:0061458;GO:0065007;	GO:0005575;GO:0005622;GO:0005623;GO:0005634;GO:0043226;GO:0043227;GO:0043229;GO:0043231;GO:0044424;GO:0044464;	WUSCHEL-related homeobox	WUSCHEL-related homeobox 4
Cla97C08G159910	264	89.7162	194.712	1.11636	4.7e-10	5.58e-09	Up	NA	NA	NA	NA	NA	NA	Unknown protein
Cla97C08G160510	921	89.5874	189.472	1.08421	4.97e-09	5.17e-08	Up	NA	NA	GO:0003674;GO:0005488;GO:0008270;GO:0043167;GO:0043169;GO:0046872;GO:0046914;	GO:0001101;GO:0007154;GO:0007165;GO:0007275;GO:0007568;GO:0008150;GO:0009719;GO:0009725;GO:0009753;GO:0009755;GO:0009867;GO:0009987;GO:0010033;GO:0010150;GO:0023052;GO:0032501;GO:0032502;GO:0032870;GO:0042221;GO:0048366;GO:0048367;GO:0048731;GO:0048827;GO:0048856;GO:0050789;GO:0050794;GO:0050896;GO:0051716;GO:0065007;GO:0070887;GO:0071229;GO:0071310;GO:0071395;GO:0071495;GO:0090693;GO:0099402;GO:…	GO:0005575;GO:0005622;GO:0005623;GO:0005634;GO:0043226;GO:0043227;GO:0043229;GO:0043231;GO:0044424;GO:0044464;	zinc finger CCCH domain-containing protein	Zinc finger CCCH domain-containing protein 20
Cla97C08G160520	621	14.7329	62.204	2.05867	3.69e-08	3.33e-07	Up	K09422 MYBP; transcription factor MYB, plant	NA	GO:0000981;GO:0001067;GO:0001134;GO:0001135;GO:0003674;GO:0003676;GO:0003677;GO:0003700;GO:0005488;GO:0043565;GO:0044212;GO:0097159;GO:0140110;GO:1901363;GO:0005515;GO:0008134;	GO:0001101;GO:0006355;GO:0006357;GO:0008150;GO:0009719;GO:0009725;GO:0009751;GO:0009889;GO:0009987;GO:0010033;GO:0010468;GO:0010556;GO:0014070;GO:0019219;GO:0019222;GO:0030154;GO:0031323;GO:0031326;GO:0032502;GO:0042221;GO:0042493;GO:0046677;GO:0048869;GO:0050789;GO:0050794;GO:0050896;GO:0051171;GO:0051252;GO:0060255;GO:0065007;GO:0080090;GO:1901700;GO:1903506;GO:2000112;GO:2001141;GO:0008152;GO:…	GO:0005575;GO:0005622;GO:0005623;GO:0005634;GO:0043226;GO:0043227;GO:0043229;GO:0043231;GO:0044424;GO:0044464;	SANT SWI3, ADA2, N-CoR and TFIIIB'' DNA-binding domains	Myb transcription factor
Cla97C08G160790	1461	241.298	491.515	1.02245	8.27e-19	2.6e-17	Up	NA	NA	NA	NA	NA	Short calmodulin-binding motif containing conserved Ile and Gln residues.	IQ domain-containing protein IQM1
Cla97C09G161870	1527	18.0725	50.275	1.4844	3.45e-05	0.000177675	Up	K15813 LUP4; beta-amyrin synthase [EC:5.4.99.39]	ko00909:Sesquiterpenoid and triterpenoid biosynthesis	GO:0003674;GO:0003824;GO:0016853;GO:0016866;GO:0031559;GO:0042300;	GO:0006629;GO:0006720;GO:0006721;GO:0006722;GO:0008150;GO:0008152;GO:0008299;GO:0008610;GO:0009058;GO:0009987;GO:0016104;GO:0016114;GO:0019742;GO:0019745;GO:0044237;GO:0044238;GO:0044249;GO:0044255;GO:0071704;GO:1901360;GO:1901362;GO:1901576;	NA	Belongs to the terpene cyclase mutase family	Terpene cyclase/mutase family member
Cla97C09G164260	240	10.1926	24.1359	1.23702	0.0128618	0.0336421	Up	NA	NA	NA	NA	NA	NA	serine-rich protein-related
Cla97C09G165260	429	87.7164	176.849	1.0098	3.44e-07	2.61e-06	Up	NA	NA	NA	NA	NA	VQ motif	VQ motif-containing protein 11
Cla97C09G165930	384	140.14	344.615	1.29763	6.42e-21	2.38e-19	Up	NA	NA	NA	NA	NA	NA	Oxidoreductase/transition metal ion-binding protein
Cla97C09G166590	342	142.104	295.335	1.05259	1.45e-10	1.85e-09	Up	NA	NA	NA	NA	NA	NA	Unknown protein
Cla97C09G167760	597	84.7101	182.405	1.10556	5.99e-09	6.14e-08	Up	NA	NA	GO:0001067;GO:0003674;GO:0003676;GO:0003677;GO:0003700;GO:0005488;GO:0043565;GO:0044212;GO:0097159;GO:0140110;GO:1901363;	GO:0001101;GO:0006355;GO:0007154;GO:0007165;GO:0008150;GO:0009719;GO:0009725;GO:0009735;GO:0009736;GO:0009739;GO:0009740;GO:0009755;GO:0009787;GO:0009788;GO:0009888;GO:0009889;GO:0009966;GO:0009968;GO:0009987;GO:0010026;GO:0010033;GO:0010468;GO:0010476;GO:0010556;GO:0010646;GO:0010648;GO:0019219;GO:0019222;GO:0023051;GO:0023052;GO:0023057;GO:0030154;GO:0031323;GO:0031326;GO:0032502;GO:0032870;GO:…	GO:0005575;GO:0005622;GO:0005623;GO:0005634;GO:0005737;GO:0005829;GO:0005840;GO:0022626;GO:0032991;GO:0043226;GO:0043227;GO:0043228;GO:0043229;GO:0043231;GO:0043232;GO:0044424;GO:0044444;GO:0044445;GO:0044464;GO:1990904;	zinc finger	zinc finger protein 6-like
Cla97C09G168420	504	14.9973	32.4281	1.11549	0.0082489	0.0229685	Up	NA	NA	NA	NA	NA	Universal stress protein	universal stress protein A-like protein isoform X1
Cla97C09G169780	804	15.0448	32.1527	1.09588	0.0129813	0.0338934	Up	NA	NA	NA	NA	NA	Transcriptional repressor, ovate	Transcription repressor
Cla97C09G169790	774	0.625722	9.00865	3.8084	0.00493425	0.014743	Up	NA	NA	NA	NA	NA	Late embryogenesis abundant protein	late embryogenesis abundant protein D-34
Cla97C09G170200	1518	501.188	1019.04	1.02469	3.07e-38	2.86e-36	Up	NA	NA	GO:0003674;GO:0003824;GO:0004620;GO:0004806;GO:0008970;GO:0016298;GO:0016787;GO:0016788;GO:0047714;GO:0052689;	NA	GO:0005575;GO:0005622;GO:0005623;GO:0005737;GO:0009507;GO:0009536;GO:0043226;GO:0043227;GO:0043229;GO:0043231;GO:0044424;GO:0044444;GO:0044464;	Phospholipase A1-Igamma2, chloroplastic-like	phospholipase A1-Igamma1, chloroplastic
Cla97C09G170860	312	45.8835	107.696	1.223	1.09e-06	7.6e-06	Up	NA	NA	NA	NA	NA	NA	Unknown protein
Cla97C09G171720	216	341.549	761.951	1.15712	2.24e-30	1.5e-28	Up	NA	NA	NA	NA	NA	NA	Unknown protein
Cla97C09G172860	2034	401.156	1558.86	1.95895	4.66e-120	1.89e-117	Up	K03283 HSPA1s; heat shock 70kDa protein 1/2/6/8	ko03040:Spliceosome|ko04141:Protein processing in endoplasmic reticulum|ko04144:Endocytosis	NA	GO:0006605;GO:0006810;GO:0006886;GO:0006950;GO:0008104;GO:0008150;GO:0009266;GO:0009408;GO:0009628;GO:0010035;GO:0010038;GO:0015031;GO:0015833;GO:0033036;GO:0033365;GO:0034613;GO:0042221;GO:0042886;GO:0045036;GO:0045184;GO:0046686;GO:0046907;GO:0050896;GO:0051179;GO:0051234;GO:0051641;GO:0051649;GO:0070727;GO:0071702;GO:0071705;GO:0072594;GO:0072596;GO:0072598;	GO:0005575;GO:0005576;GO:0005622;GO:0005623;GO:0005737;GO:0009507;GO:0009526;GO:0009532;GO:0009536;GO:0009570;GO:0009579;GO:0009941;GO:0031967;GO:0031975;GO:0043226;GO:0043227;GO:0043229;GO:0043231;GO:0044422;GO:0044424;GO:0044434;GO:0044435;GO:0044444;GO:0044446;GO:0044464;GO:0048046;	Stromal 70 kDa heat shock-related protein	Heat shock protein, putative
Cla97C09G173550	339	1225.21	3239.28	1.40215	4.92e-142	3.11e-139	Up	K03113 EIF1, SUI1; translation initiation factor 1	NA	NA	NA	NA	Protein translation factor SUI1 homolog	protein translation factor SUI1 homolog
Cla97C09G174780	606	29.905	96.94	1.69038	6.18e-10	7.2e-09	Up	NA	NA	NA	NA	NA	NA	Microspore-specific promoter 2, putative
Cla97C09G174840	426	73.6439	211.389	1.51708	2.33e-16	5.73e-15	Up	NA	NA	NA	NA	NA	NA	Auxin responsive SAUR protein
Cla97C09G175690	876	511.728	1289	1.33504	1.57e-66	3.46e-64	Up	NA	NA	GO:0003674;GO:0005488;GO:0030246;GO:0031406;GO:0033293;GO:0036094;GO:0043167;GO:0043168;GO:0043177;GO:0048029;GO:0048032;	GO:0007154;GO:0007267;GO:0008150;GO:0009987;GO:0023052;	GO:0005575;GO:0005623;GO:0005886;GO:0016020;GO:0044464;GO:0071944;	Remorin, N-terminal region	remorin
Cla97C09G177710	372	37.4229	201.836	2.43493	4.73e-30	3.12e-28	Up	NA	NA	NA	NA	NA	NA	Unknown protein
Cla97C09G178420	1554	10.9675	27.9261	1.33153	0.00615795	0.0178384	Up	K24184 CYP89A; cytochrome P450 family 89 subfamily A [EC:1.14.-.-]	NA	NA	NA	NA	Cytochrome p450	Cytochrome P450 89A2
Cla97C09G178540	1350	332.126	799.757	1.27128	5.52e-40	5.34e-38	Up	NA	NA	GO:0003674;GO:0003824;GO:0016740;GO:0016746;GO:0016747;GO:0047634;	NA	NA	Isoflavonoid malonyl transferase	malonyl-CoA:anthocyanidin 5-O-glucoside-6''-O-malonyltransferase-like
Cla97C09G179610	744	150.391	307.987	1.03295	4.91e-12	7.7e-11	Up	K01166 RNASET2; ribonuclease T2 [EC:4.6.1.19]	NA	NA	NA	NA	Belongs to the RNase T2 family	ribonuclease 1-like
Cla97C09G179650	291	224.461	536.223	1.25507	3.01e-27	1.7e-25	Up	NA	NA	GO:0003674;GO:0003676;GO:0003677;GO:0005488;GO:0005515;GO:0042802;GO:0042803;GO:0046983;GO:0097159;GO:1901363;	GO:0000003;GO:0003006;GO:0007275;GO:0008150;GO:0009791;GO:0009888;GO:0009908;GO:0010022;GO:0010073;GO:0010582;GO:0022414;GO:0032501;GO:0032502;GO:0035670;GO:0048367;GO:0048437;GO:0048438;GO:0048440;GO:0048467;GO:0048507;GO:0048608;GO:0048731;GO:0048827;GO:0048856;GO:0061458;GO:0090567;GO:0099402;	GO:0005575;GO:0005622;GO:0005623;GO:0005634;GO:0005737;GO:0043226;GO:0043227;GO:0043229;GO:0043231;GO:0044424;GO:0044464;	ZF-HD protein dimerisation region	mini zinc finger protein 2
Cla97C09G180230	1065	8.14615	23.8477	1.52668	0.00537624	0.0158761	Up	NA	NA	NA	NA	NA	EamA-like transporter family	WAT1-related protein
Cla97C09G180270	456	225.984	507.221	1.16535	1.42e-25	7.35e-24	Up	NA	NA	NA	NA	NA	NA	NHL domain protein
Cla97C09G180650	192	33.7495	115.687	1.76984	2.09e-12	3.41e-11	Up	NA	NA	NA	NA	NA	NA	Unknown protein
Cla97C09G180690	420	17.0171	126.506	2.89321	0.000301205	0.00124747	Up	NA	NA	NA	NA	NA	NA	Unknown protein
Cla97C09G184080	282	45.957	93.5916	1.02332	2.56e-05	0.000135637	Up	NA	NA	NA	NA	NA	Cysteine-rich and transmembrane domain-containing protein	Cysteine-rich transmembrane CYSTM domain containing protein
Cla97C10G184690	1185	121.977	349.521	1.51506	6.31e-25	3.13e-23	Up	K24139 PILS, ECM3; auxin efflux carrier family protein	NA	GO:0003674;GO:0005215;GO:0010329;GO:0015562;GO:0022857;GO:0080161;	GO:0006810;GO:0007275;GO:0008150;GO:0009653;GO:0009719;GO:0009725;GO:0009733;GO:0009791;GO:0009914;GO:0009966;GO:0010015;GO:0010033;GO:0010101;GO:0010102;GO:0010252;GO:0010311;GO:0010315;GO:0010646;GO:0010817;GO:0010928;GO:0022622;GO:0023051;GO:0032501;GO:0032502;GO:0040008;GO:0040009;GO:0042221;GO:0042592;GO:0048364;GO:0048527;GO:0048528;GO:0048583;GO:0048646;GO:0048731;GO:0048856;GO:0048878;GO:…	GO:0005575;GO:0005622;GO:0005623;GO:0005737;GO:0005783;GO:0005789;GO:0012505;GO:0016020;GO:0031984;GO:0042175;GO:0043226;GO:0043227;GO:0043229;GO:0043231;GO:0044422;GO:0044424;GO:0044425;GO:0044432;GO:0044444;GO:0044446;GO:0044464;GO:0098827;	Transporter	protein PIN-LIKES 7-like
Cla97C10G185780	1998	18.02	63.1343	1.81668	3.06e-07	2.35e-06	Up	K26271 MS1, MMD1; PHD finger protein MS1/MMD1	NA	GO:0003674;GO:0003676;GO:0003677;GO:0003682;GO:0005488;GO:0005515;GO:0008134;GO:0033613;GO:0042393;GO:0043565;GO:0097159;GO:1901363;GO:1990188;	GO:0000003;GO:0000212;GO:0000226;GO:0000280;GO:0003006;GO:0006323;GO:0006355;GO:0006996;GO:0007010;GO:0007017;GO:0007049;GO:0007051;GO:0007059;GO:0007060;GO:0007140;GO:0007275;GO:0007276;GO:0008150;GO:0009555;GO:0009889;GO:0009987;GO:0010032;GO:0010468;GO:0010556;GO:0016043;GO:0019219;GO:0019222;GO:0019953;GO:0022402;GO:0022412;GO:0022414;GO:0030154;GO:0030261;GO:0031323;GO:0031326;GO:0032501;GO:…	GO:0000228;GO:0000785;GO:0000790;GO:0000791;GO:0005575;GO:0005622;GO:0005623;GO:0005634;GO:0005694;GO:0005719;GO:0031974;GO:0031981;GO:0043226;GO:0043227;GO:0043228;GO:0043229;GO:0043231;GO:0043232;GO:0043233;GO:0044422;GO:0044424;GO:0044427;GO:0044428;GO:0044446;GO:0044454;GO:0044464;GO:0070013;	PHD finger protein MALE MEIOCYTE DEATH	PHD domain-containing protein
Cla97C10G185860	1497	160.783	369.12	1.19891	1.12e-20	4.09e-19	Up	K00938 E2.7.4.2, mvaK2; phosphomevalonate kinase [EC:2.7.4.2]	ko00900:Terpenoid backbone biosynthesis	GO:0003674;GO:0003824;GO:0004631;GO:0016301;GO:0016740;GO:0016772;GO:0016776;	GO:0006066;GO:0006084;GO:0006139;GO:0006163;GO:0006629;GO:0006637;GO:0006644;GO:0006694;GO:0006696;GO:0006720;GO:0006725;GO:0006732;GO:0006753;GO:0006790;GO:0006793;GO:0006796;GO:0006807;GO:0008150;GO:0008152;GO:0008202;GO:0008204;GO:0008299;GO:0008610;GO:0008654;GO:0009058;GO:0009117;GO:0009150;GO:0009240;GO:0009259;GO:0009987;GO:0016125;GO:0016126;GO:0016128;GO:0016129;GO:0016310;GO:0019287;GO:…	GO:0005575;GO:0005622;GO:0005623;GO:0005737;GO:0005777;GO:0042579;GO:0043226;GO:0043227;GO:0043229;GO:0043231;GO:0044424;GO:0044444;GO:0044464;	Phosphomevalonate	Phosphomevalonate kinase
Cla97C10G186140	357	724.515	1483.23	1.0345	2.21e-35	1.84e-33	Up	NA	NA	NA	NA	NA	NA	Unknown protein
Cla97C10G186590	672	39.3922	134.639	1.76665	3.75e-14	7.51e-13	Up	K21806 VCPKMT, METTL21D; protein N-lysine methyltransferase METTL21D [EC:2.1.1.-]	NA	NA	NA	NA	Lysine methyltransferase	protein N-lysine methyltransferase METTL21A-like
Cla97C10G186610	369	52.9443	134.311	1.34522	1.29e-09	1.45e-08	Up	NA	NA	NA	NA	NA	NA	Unknown protein
Cla97C10G187010	840	42.8157	155.031	1.8594	7.54e-17	1.96e-15	Up	K09286 EREBP; EREBP-like factor	NA	GO:0003674;GO:0003700;GO:0140110;	GO:0000160;GO:0001101;GO:0002218;GO:0002252;GO:0002253;GO:0002376;GO:0002682;GO:0002684;GO:0006355;GO:0006950;GO:0006952;GO:0006955;GO:0007154;GO:0007165;GO:0008150;GO:0009605;GO:0009607;GO:0009617;GO:0009682;GO:0009719;GO:0009723;GO:0009725;GO:0009753;GO:0009755;GO:0009864;GO:0009867;GO:0009873;GO:0009888;GO:0009889;GO:0009891;GO:0009893;GO:0009987;GO:0010033;GO:0010087;GO:0010200;GO:0010243;GO:…	GO:0005575;GO:0005622;GO:0005623;GO:0005634;GO:0043226;GO:0043227;GO:0043229;GO:0043231;GO:0044424;GO:0044464;	ethylene-responsive transcription factor	Ethylene responsive transcription factor 1a
Cla97C10G187290	636	4230.8	10737.8	1.3438	1.1e-180	1.11e-177	Up	K13993 HSP20; HSP20 family protein	ko04141:Protein processing in endoplasmic reticulum	NA	GO:0006950;GO:0006970;GO:0008150;GO:0009266;GO:0009408;GO:0009628;GO:0050896;	NA	Belongs to the small heat shock protein (HSP20) family	Small heat shock protein
Cla97C10G188000	801	14.429	43.2867	1.58198	0.000187793	0.000816001	Up	NA	NA	NA	GO:0002831;GO:0006950;GO:0006952;GO:0008150;GO:0009605;GO:0009607;GO:0009620;GO:0031341;GO:0031343;GO:0031347;GO:0032101;GO:0040008;GO:0042268;GO:0043207;GO:0043900;GO:0043901;GO:0043902;GO:0043903;GO:0044126;GO:0044130;GO:0044144;GO:0044146;GO:0045919;GO:0045926;GO:0048518;GO:0048519;GO:0048522;GO:0048583;GO:0050789;GO:0050794;GO:0050832;GO:0050896;GO:0051704;GO:0051707;GO:0051709;GO:0051710;GO:…	NA	thaumatin-like protein	Thaumatin-like protein
Cla97C10G188160	1860	99.7488	1066.87	3.42323	4.5e-195	4.79e-192	Up	NA	NA	NA	NA	NA	glutamyl-tRNA(Gln) amidotransferase subunit	glutamyl-tRNA(Gln) amidotransferase subunit A
Cla97C10G188660	897	14.2168	46.9063	1.72849	1.18e-05	6.72e-05	Up	K13066 COMT; caffeic acid 3-O-methyltransferase / acetylserotonin O-methyltransferase [EC:2.1.1.68 2.1.1.4]	ko00380:Tryptophan metabolism|ko00940:Phenylpropanoid biosynthesis	NA	NA	NA	Belongs to the class I-like SAM-binding methyltransferase superfamily. Cation-independent O- methyltransferase family	Caffeic acid 3-O-methyltransferase-like
Cla97C10G189050	897	164.537	342.116	1.05585	2.08e-15	4.72e-14	Up	K08867 WNK, PRKWNK; WNK lysine deficient protein kinase [EC:2.7.11.1]	NA	GO:0003674;GO:0003824;GO:0004672;GO:0004674;GO:0016301;GO:0016740;GO:0016772;GO:0016773;GO:0140096;	GO:0006464;GO:0006468;GO:0006793;GO:0006796;GO:0006807;GO:0007154;GO:0007165;GO:0008150;GO:0008152;GO:0009987;GO:0016310;GO:0019538;GO:0023052;GO:0035556;GO:0036211;GO:0043170;GO:0043412;GO:0044237;GO:0044238;GO:0044260;GO:0044267;GO:0050789;GO:0050794;GO:0050896;GO:0051716;GO:0065007;GO:0071704;GO:1901564;	GO:0005575;GO:0005622;GO:0005623;GO:0005737;GO:0005829;GO:0044424;GO:0044444;GO:0044464;	Serine threonine-protein kinase	Protein kinase domain-containing protein
Cla97C10G189470	531	72.2599	164.123	1.18361	4.51e-09	4.74e-08	Up	NA	NA	NA	NA	NA	Cotton fibre expressed protein	LIM and calponin domains-containing protein 1, putative
Cla97C10G189870	1101	39.297	103.401	1.38613	7.64e-07	5.44e-06	Up	K03146 THI4, THI1; cysteine-dependent adenosine diphosphate thiazole synthase [EC:2.4.2.60]	ko00730:Thiamine metabolism	GO:0003674;GO:0005488;GO:0005506;GO:0043167;GO:0043169;GO:0046872;GO:0046914;	GO:0006725;GO:0006766;GO:0006767;GO:0006772;GO:0006790;GO:0006807;GO:0008150;GO:0008152;GO:0009058;GO:0009110;GO:0009228;GO:0009987;GO:0017144;GO:0018130;GO:0018131;GO:0019438;GO:0034641;GO:0042364;GO:0042723;GO:0042724;GO:0044237;GO:0044249;GO:0044271;GO:0044272;GO:0044281;GO:0044283;GO:0046483;GO:0046484;GO:0052837;GO:0052838;GO:0071704;GO:0072527;GO:0072528;GO:1901360;GO:1901362;GO:1901564;GO:…	GO:0005575;GO:0005622;GO:0005623;GO:0005737;GO:0005829;GO:0044424;GO:0044444;GO:0044464;	Involved in biosynthesis of the thiamine precursor thiazole. Catalyzes the conversion of NAD and glycine to adenosine diphosphate 5-(2-hydroxyethyl)-4-methylthiazole-2-carboxylic acid (ADT), an adenylated thiazole intermediate. The reaction includes an iron-dependent sulfide transfer from a conserved cysteine residue of the protein to a thiazole intermediate. The enzyme can only undergo a single …	Thiamine thiazole synthase, chloroplastic
Cla97C10G190580	1023	64.3213	136.045	1.08076	3.29e-07	2.51e-06	Up	NA	NA	GO:0001067;GO:0003674;GO:0003676;GO:0003677;GO:0003700;GO:0005488;GO:0043565;GO:0044212;GO:0097159;GO:0140110;GO:1901363;	GO:0000003;GO:0003006;GO:0006355;GO:0007275;GO:0008150;GO:0009555;GO:0009653;GO:0009791;GO:0009888;GO:0009889;GO:0009908;GO:0010154;GO:0010468;GO:0010556;GO:0019219;GO:0019222;GO:0022414;GO:0031323;GO:0031326;GO:0032501;GO:0032502;GO:0035670;GO:0045995;GO:0048229;GO:0048316;GO:0048317;GO:0048367;GO:0048437;GO:0048438;GO:0048440;GO:0048443;GO:0048466;GO:0048467;GO:0048481;GO:0048608;GO:0048653;GO:…	GO:0005575;GO:0005622;GO:0005623;GO:0005634;GO:0043226;GO:0043227;GO:0043229;GO:0043231;GO:0044424;GO:0044464;	NAC domain-containing protein	NAC domain-containing protein
Cla97C10G190620	351	37.3593	124.756	1.73948	1.11e-12	1.88e-11	Up	NA	NA	NA	NA	NA	Thaumatin family	Thaumatin-like protein
Cla97C10G191220	573	173.679	3280.93	4.24333	0	0	Up	K13993 HSP20; HSP20 family protein	ko04141:Protein processing in endoplasmic reticulum	NA	NA	NA	Belongs to the small heat shock protein (HSP20) family	Heat-shock protein
Cla97C10G191470	1845	19.6479	57.6744	1.55884	5.38e-06	3.27e-05	Up	K01662 dxs; 1-deoxy-D-xylulose-5-phosphate synthase [EC:2.2.1.7]	ko00730:Thiamine metabolism|ko00900:Terpenoid backbone biosynthesis	NA	NA	NA	1-deoxy-D-xylulose-5-phosphate synthase 2	1-deoxy-D-xylulose-5-phosphate synthase
Cla97C10G191480	2157	38.8341	112.18	1.53213	4.89e-10	5.78e-09	Up	K01662 dxs; 1-deoxy-D-xylulose-5-phosphate synthase [EC:2.2.1.7]	ko00730:Thiamine metabolism|ko00900:Terpenoid backbone biosynthesis	NA	NA	NA	1-deoxy-D-xylulose-5-phosphate synthase 2	1-deoxy-D-xylulose-5-phosphate synthase
Cla97C10G191670	468	18.6346	37.6887	1.00822	0.0152736	0.0389979	Up	NA	NA	NA	NA	NA	NA	agamous-like MADS-box protein AGL14
Cla97C10G192090	384	8.65975	25.2389	1.5358	0.0031115	0.00987559	Up	NA	NA	NA	NA	NA	NA	Unknown protein
Cla97C10G192470	759	6.60777	18.6392	1.481	0.0148409	0.0380421	Up	K01166 RNASET2; ribonuclease T2 [EC:4.6.1.19]	NA	GO:0003674;GO:0003824;GO:0004518;GO:0004519;GO:0004521;GO:0004540;GO:0016787;GO:0016788;GO:0140098;	GO:0006139;GO:0006401;GO:0006725;GO:0006807;GO:0008150;GO:0008152;GO:0009056;GO:0009057;GO:0009892;GO:0009894;GO:0009895;GO:0009987;GO:0010506;GO:0010507;GO:0016070;GO:0016072;GO:0016075;GO:0019222;GO:0019439;GO:0031323;GO:0031324;GO:0031329;GO:0031330;GO:0034641;GO:0034655;GO:0034660;GO:0034661;GO:0043170;GO:0044237;GO:0044238;GO:0044248;GO:0044260;GO:0044265;GO:0044270;GO:0046483;GO:0046700;GO:…	GO:0005575;GO:0005622;GO:0005623;GO:0005737;GO:0005773;GO:0005783;GO:0010168;GO:0012505;GO:0043226;GO:0043227;GO:0043229;GO:0043231;GO:0044424;GO:0044444;GO:0044464;	Belongs to the RNase T2 family	Ribonuclease T(2)
Cla97C10G192520	486	53.5765	114.862	1.10076	6.74e-07	4.86e-06	Up	NA	NA	NA	NA	NA	NA	Unknown protein
Cla97C10G192730	732	653.829	1333.02	1.02829	1.7e-49	2.29e-47	Up	K22314 GGP; glucosinolate gamma-glutamyl hydrolase [EC:3.4.19.16]	NA	NA	NA	NA	glutamine amidotransferase	Glutamine amidotransferase type-1 domain-containing protein
Cla97C10G193360	216	49.4071	109.456	1.14564	9.76e-06	5.65e-05	Up	NA	NA	NA	NA	NA	NA	Unknown protein
Cla97C10G194030	894	773.954	1716.74	1.14889	1.22e-69	2.8e-67	Up	K09286 EREBP; EREBP-like factor	NA	GO:0003674;GO:0003700;GO:0140110;	GO:0006355;GO:0006950;GO:0008150;GO:0009628;GO:0009889;GO:0010468;GO:0010556;GO:0019219;GO:0019222;GO:0031323;GO:0031326;GO:0034059;GO:0036293;GO:0050789;GO:0050793;GO:0050794;GO:0050896;GO:0051171;GO:0051239;GO:0051252;GO:0060255;GO:0065007;GO:0070482;GO:0080090;GO:1903506;GO:2000026;GO:2000112;GO:2000280;GO:2001141;GO:0008152;GO:0006139;GO:0006351;GO:0006725;GO:0006807;GO:0009058;GO:0009059;GO:…	GO:0005575;GO:0005622;GO:0005623;GO:0005634;GO:0043226;GO:0043227;GO:0043229;GO:0043231;GO:0044424;GO:0044464;	transcription factor	ethylene-responsive transcription factor ERF071
Cla97C10G194080	3285	79.4465	192.911	1.2753	1.12e-11	1.67e-10	Up	K00770 E2.4.2.24; 1,4-beta-D-xylan synthase [EC:2.4.2.24]	ko00520:Amino sugar and nucleotide sugar metabolism	GO:0000030;GO:0003674;GO:0003824;GO:0016740;GO:0016757;GO:0016758;GO:0019187;GO:0046527;GO:0051753;	GO:0000278;GO:0000281;GO:0000910;GO:0000911;GO:0000919;GO:0001101;GO:0006950;GO:0006970;GO:0007049;GO:0007275;GO:0008150;GO:0008152;GO:0009414;GO:0009415;GO:0009628;GO:0009651;GO:0009987;GO:0010035;GO:0016043;GO:0022402;GO:0022607;GO:0032501;GO:0032502;GO:0032506;GO:0042221;GO:0042546;GO:0044085;GO:0048367;GO:0048731;GO:0048856;GO:0050896;GO:0051301;GO:0061640;GO:0070085;GO:0071554;GO:0071669;GO:…	GO:0005575;GO:0005622;GO:0005623;GO:0005737;GO:0005794;GO:0012505;GO:0043226;GO:0043227;GO:0043229;GO:0043231;GO:0044424;GO:0044444;GO:0044464;	Belongs to the glycosyltransferase 2 family	Cellulose synthase-like protein
Cla97C10G195190	996	39.6099	85.6201	1.10255	4.43e-05	0.000222142	Up	NA	NA	NA	NA	NA	NA	Late embryogenesis abundant protein, group 2
Cla97C10G195800	942	32.2519	146.057	2.19117	1.57e-18	4.72e-17	Up	NA	NA	GO:0001067;GO:0003674;GO:0003676;GO:0003677;GO:0003700;GO:0005488;GO:0044212;GO:0097159;GO:0140110;GO:1901363;	GO:0001101;GO:0002237;GO:0006355;GO:0006950;GO:0006952;GO:0008150;GO:0009605;GO:0009607;GO:0009611;GO:0009617;GO:0009620;GO:0009719;GO:0009725;GO:0009751;GO:0009889;GO:0009890;GO:0009892;GO:0010033;GO:0010200;GO:0010243;GO:0010468;GO:0010556;GO:0010558;GO:0010605;GO:0010629;GO:0014070;GO:0019219;GO:0019222;GO:0031323;GO:0031324;GO:0031326;GO:0031327;GO:0031347;GO:0042221;GO:0042493;GO:0042742;GO:…	GO:0005575;GO:0005622;GO:0005623;GO:0005634;GO:0043226;GO:0043227;GO:0043229;GO:0043231;GO:0044424;GO:0044464;	WRKY transcription factor	WRKY protein
Cla97C10G195870	978	6.70353	21.7321	1.68449	0.00817253	0.0227889	Up	K09753 CCR; cinnamoyl-CoA reductase [EC:1.2.1.44]	ko00940:Phenylpropanoid biosynthesis	GO:0003674;GO:0003824;GO:0016491;GO:0016620;GO:0016621;GO:0016903;	GO:0006725;GO:0006950;GO:0007623;GO:0008150;GO:0008152;GO:0009058;GO:0009266;GO:0009409;GO:0009628;GO:0009698;GO:0009699;GO:0009808;GO:0009809;GO:0009987;GO:0019438;GO:0019748;GO:0042752;GO:0042754;GO:0044237;GO:0044249;GO:0044550;GO:0048511;GO:0048519;GO:0050789;GO:0050896;GO:0055114;GO:0065007;GO:0071704;GO:1901360;GO:1901362;GO:1901576;	GO:0005575;GO:0005622;GO:0005623;GO:0005737;GO:0005829;GO:0044424;GO:0044444;GO:0044464;	Cinnamoyl-CoA reductase	cinnamoyl coa reductase
Cla97C10G196380	1887	365.488	844.451	1.20819	1.62e-37	1.46e-35	Up	K05349 bglX; beta-glucosidase [EC:3.2.1.21]	ko00460:Cyanoamino acid metabolism|ko00500:Starch and sucrose metabolism|ko00999:Biosynthesis of various plant secondary metabolites	GO:0003674;GO:0003824;GO:0004553;GO:0008422;GO:0015926;GO:0016787;GO:0016798;	GO:0000272;GO:0005975;GO:0005976;GO:0008150;GO:0008152;GO:0009056;GO:0009057;GO:0009251;GO:0016052;GO:0043170;GO:0044042;GO:0044238;GO:0071704;GO:1901575;	GO:0000323;GO:0005575;GO:0005622;GO:0005623;GO:0005737;GO:0005764;GO:0005773;GO:0005886;GO:0016020;GO:0042597;GO:0043226;GO:0043227;GO:0043229;GO:0043231;GO:0044424;GO:0044444;GO:0044464;GO:0071944;	Lysosomal beta glucosidase-like	Glycosyl hydrolase family protein
Cla97C10G199550	876	176.894	391.089	1.14344	3.05e-19	9.82e-18	Up	K09422 MYBP; transcription factor MYB, plant	NA	NA	NA	NA	Myb-related protein	MYB transcription factor
Cla97C10G201680	444	147.078	326.973	1.15195	2.92e-16	7.14e-15	Up	K01285 PRCP; lysosomal Pro-X carboxypeptidase [EC:3.4.16.2]	NA	GO:0003674;GO:0003824;GO:0004177;GO:0008233;GO:0008238;GO:0008239;GO:0016787;GO:0070011;GO:0140096;	GO:0001525;GO:0001568;GO:0001944;GO:0003008;GO:0003013;GO:0003073;GO:0003085;GO:0006508;GO:0006807;GO:0006950;GO:0007275;GO:0008015;GO:0008150;GO:0008152;GO:0008217;GO:0009611;GO:0009653;GO:0010594;GO:0010632;GO:0019538;GO:0030334;GO:0032501;GO:0032502;GO:0032879;GO:0035239;GO:0035295;GO:0040012;GO:0042060;GO:0043170;GO:0043535;GO:0044238;GO:0045776;GO:0048514;GO:0048646;GO:0048731;GO:0048856;GO:…	NA	Lysosomal Pro-X	lysosomal Pro-X carboxypeptidase-like
Cla97C10G201890	288	22.4191	61.4673	1.47043	8.14e-05	0.000384578	Up	NA	NA	NA	NA	NA	Has 11 Blast hits to 11 proteins in 5 species Archae - 0	SRP54 domain-containing protein
Cla97C10G202540	1602	31.5919	94.8248	1.57622	1.08e-08	1.07e-07	Up	K13680 CSLA; beta-mannan synthase [EC:2.4.1.32]	NA	GO:0000030;GO:0003674;GO:0003824;GO:0016740;GO:0016757;GO:0016758;GO:0019187;GO:0051753;	GO:0008150;GO:0008152;GO:0009292;GO:0009294;GO:0009605;GO:0009607;GO:0009617;GO:0009987;GO:0043207;GO:0044764;GO:0050896;GO:0051704;GO:0051707;GO:0070085;GO:0097502;	NA	Glucomannan 4-beta-mannosyltransferase 9-like	glucomannan 4-beta-mannosyltransferase 9-like
Cla97C10G202550	441	195.104	1090.03	2.4811	1.02e-147	7.15e-145	Up	NA	NA	NA	NA	NA	NA	Unknown protein
Cla97C10G203590	969	115.256	849.257	2.88162	1.54e-132	8.44e-130	Up	K00430 E1.11.1.7; peroxidase [EC:1.11.1.7]	ko00940:Phenylpropanoid biosynthesis	GO:0003674;GO:0003824;GO:0004601;GO:0016209;GO:0016491;GO:0016684;	GO:0006950;GO:0006952;GO:0008150;GO:0008152;GO:0009605;GO:0009607;GO:0009620;GO:0009636;GO:0009664;GO:0009987;GO:0016043;GO:0042221;GO:0043207;GO:0045229;GO:0050832;GO:0050896;GO:0051704;GO:0051707;GO:0051716;GO:0055114;GO:0070887;GO:0071554;GO:0071555;GO:0071669;GO:0071840;GO:0097237;GO:0098542;GO:0098754;GO:0098869;GO:1990748;	GO:0005575;GO:0005618;GO:0005622;GO:0005623;GO:0005737;GO:0005829;GO:0005911;GO:0009505;GO:0009506;GO:0030054;GO:0030312;GO:0044424;GO:0044444;GO:0044464;GO:0055044;GO:0071944;	Removal of H(2)O(2), oxidation of toxic reductants, biosynthesis and degradation of lignin, suberization, auxin catabolism, response to environmental stresses such as wounding, pathogen attack and oxidative stress	Peroxidase
Cla97C10G203830	1431	38.4625	119.587	1.64021	7.55e-11	1e-09	Up	K09284 AP2; AP2-like factor, euAP2 lineage	NA	GO:0003674;GO:0003700;GO:0140110;	GO:0000003;GO:0003002;GO:0003006;GO:0006355;GO:0007275;GO:0007389;GO:0008150;GO:0009653;GO:0009791;GO:0009888;GO:0009889;GO:0009908;GO:0010073;GO:0010093;GO:0010154;GO:0010468;GO:0010556;GO:0019219;GO:0019222;GO:0022414;GO:0031323;GO:0031326;GO:0032501;GO:0032502;GO:0035670;GO:0048316;GO:0048367;GO:0048437;GO:0048438;GO:0048440;GO:0048444;GO:0048449;GO:0048467;GO:0048481;GO:0048507;GO:0048608;GO:…	GO:0005575;GO:0005622;GO:0005623;GO:0005634;GO:0043226;GO:0043227;GO:0043229;GO:0043231;GO:0044424;GO:0044464;	Floral homeotic protein	floral homeotic protein APETALA 2-like
Cla97C10G204410	885	7163.3	15075.5	1.07326	1.5e-133	8.41e-131	Up	K07025 K07025; putative hydrolase of the HAD superfamily	NA	NA	NA	NA	Haloacid dehalogenase-like hydrolase	Haloacid dehalogenase-like hydrolase (HAD) superfamily protein
Cla97C10G205510	882	200.919	481.866	1.2574	2.28e-21	8.86e-20	Up	NA	NA	GO:0003674;GO:0005488;GO:0030246;	GO:0008150;GO:0009605;GO:0009607;GO:0009617;GO:0043207;GO:0050896;GO:0051704;GO:0051707;	GO:0005575;GO:0005622;GO:0005623;GO:0005737;GO:0005773;GO:0005774;GO:0016020;GO:0031090;GO:0043226;GO:0043227;GO:0043229;GO:0043231;GO:0044422;GO:0044424;GO:0044437;GO:0044444;GO:0044446;GO:0044464;GO:0098588;GO:0098805;	P-loop nucleoside triphosphate hydrolase superfamily protein	P-loop containing nucleoside triphosphate hydrolases superfamily protein
Cla97C10G205520	864	274.203	551.161	1.00976	4.8e-21	1.8e-19	Up	NA	NA	GO:0003674;GO:0005488;GO:0030246;	GO:0008150;GO:0009605;GO:0009607;GO:0009617;GO:0043207;GO:0050896;GO:0051704;GO:0051707;	GO:0005575;GO:0005622;GO:0005623;GO:0005737;GO:0005773;GO:0005774;GO:0016020;GO:0031090;GO:0043226;GO:0043227;GO:0043229;GO:0043231;GO:0044422;GO:0044424;GO:0044437;GO:0044444;GO:0044446;GO:0044464;GO:0098588;GO:0098805;	P-loop nucleoside triphosphate hydrolase superfamily protein	p-loop containing nucleoside triphosphate hydrolases superfamily protein
Cla97C10G205680	504	34.7387	73.5462	1.08552	0.000237692	0.00100604	Up	NA	NA	NA	NA	NA	UPF0098 protein	UPF0098 protein
Cla97C11G206570	753	234.25	483.433	1.04457	1.11e-17	3.1e-16	Up	NA	NA	NA	NA	NA	Belongs to the short-chain dehydrogenases reductases (SDR) family	NADPH-dependent pterin aldehyde reductase-like
Cla97C11G208460	1542	4.16294	13.9893	1.74078	0.0135592	0.0352113	Up	K03327 TC.MATE, SLC47A, norM, mdtK, dinF; multidrug resistance protein, MATE family	NA	GO:0003674;GO:0005215;GO:0015238;GO:0022857;	GO:0006810;GO:0006855;GO:0007275;GO:0007568;GO:0008150;GO:0009653;GO:0010015;GO:0010150;GO:0010252;GO:0015893;GO:0022622;GO:0031347;GO:0031348;GO:0032501;GO:0032502;GO:0040008;GO:0042221;GO:0042493;GO:0042592;GO:0046620;GO:0048364;GO:0048366;GO:0048367;GO:0048519;GO:0048583;GO:0048585;GO:0048638;GO:0048731;GO:0048827;GO:0048856;GO:0048878;GO:0050789;GO:0050793;GO:0050801;GO:0050896;GO:0051179;GO:…	GO:0005575;GO:0005622;GO:0005623;GO:0005737;GO:0005768;GO:0005770;GO:0010008;GO:0012505;GO:0016020;GO:0031090;GO:0031410;GO:0031982;GO:0043226;GO:0043227;GO:0043229;GO:0044422;GO:0044424;GO:0044433;GO:0044440;GO:0044444;GO:0044446;GO:0044464;GO:0097708;GO:0098588;GO:0098805;	Belongs to the multi antimicrobial extrusion (MATE) (TC 2.A.66.1) family	Protein DETOXIFICATION
Cla97C11G208570	318	8.42194	22.3465	1.38246	0.0203329	0.0497628	Up	K22378 RNF181; E3 ubiquitin-protein ligase RNF181 [EC:2.3.2.27]	NA	GO:0003674;GO:0003824;GO:0004842;GO:0016740;GO:0019787;GO:0061630;GO:0061659;GO:0140096;	GO:0000209;GO:0006464;GO:0006508;GO:0006511;GO:0006807;GO:0008150;GO:0008152;GO:0009056;GO:0009057;GO:0009987;GO:0010498;GO:0016567;GO:0019538;GO:0019941;GO:0030163;GO:0032446;GO:0036211;GO:0043161;GO:0043170;GO:0043412;GO:0043632;GO:0044237;GO:0044238;GO:0044248;GO:0044257;GO:0044260;GO:0044265;GO:0044267;GO:0051603;GO:0070647;GO:0071704;GO:1901564;GO:1901565;GO:1901575;	NA	E3 ubiquitin-protein ligase	E3 ubiquitin-protein ligase RING1-like
Cla97C11G208930	438	739.219	4615.33	2.64308	0	0	Up	K03627 MBF1; putative transcription factor	NA	GO:0003674;GO:0003700;GO:0003712;GO:0003713;GO:0140110;	GO:0000160;GO:0001101;GO:0006355;GO:0006950;GO:0007154;GO:0007165;GO:0008150;GO:0009266;GO:0009408;GO:0009414;GO:0009415;GO:0009628;GO:0009719;GO:0009723;GO:0009725;GO:0009737;GO:0009755;GO:0009873;GO:0009889;GO:0009891;GO:0009893;GO:0009987;GO:0010033;GO:0010035;GO:0010468;GO:0010556;GO:0010557;GO:0010604;GO:0010628;GO:0019219;GO:0019222;GO:0023052;GO:0031323;GO:0031325;GO:0031326;GO:0031328;GO:…	GO:0005575;GO:0005622;GO:0005623;GO:0005634;GO:0005730;GO:0005737;GO:0031974;GO:0031981;GO:0043226;GO:0043227;GO:0043228;GO:0043229;GO:0043231;GO:0043232;GO:0043233;GO:0044422;GO:0044424;GO:0044428;GO:0044446;GO:0044464;GO:0070013;	Multiprotein-bridging factor	multiprotein-bridging factor 1c
Cla97C11G210310	294	4.82573	17.0299	1.81728	0.00478847	0.0143604	Up	K14488 SAUR; SAUR family protein	ko04075:Plant hormone signal transduction	NA	NA	NA	auxin-induced protein	auxin-responsive protein SAUR21-like
Cla97C11G210980	840	11.0941	32.6764	1.55979	0.00119286	0.00424238	Up	NA	NA	GO:0000140;GO:0003674;GO:0003824;GO:0004806;GO:0016298;GO:0016491;GO:0016614;GO:0016616;GO:0016787;GO:0016788;GO:0052689;	GO:0006629;GO:0006638;GO:0006639;GO:0006641;GO:0006644;GO:0006650;GO:0006654;GO:0006793;GO:0006796;GO:0008150;GO:0008152;GO:0008610;GO:0008654;GO:0009056;GO:0009058;GO:0009987;GO:0016042;GO:0019433;GO:0019637;GO:0044237;GO:0044238;GO:0044242;GO:0044248;GO:0044249;GO:0044255;GO:0045017;GO:0046461;GO:0046464;GO:0046473;GO:0046474;GO:0046486;GO:0046503;GO:0055114;GO:0071704;GO:0090407;GO:1901575;GO:…	GO:0005575;GO:0005622;GO:0005623;GO:0005737;GO:0005783;GO:0005811;GO:0012505;GO:0043226;GO:0043227;GO:0043228;GO:0043229;GO:0043231;GO:0043232;GO:0044424;GO:0044444;GO:0044464;	Belongs to the short-chain dehydrogenases reductases (SDR) family	NADPH-dependent 1-acyldihydroxyacetone phosphate reductase-like
Cla97C11G210990	1581	1982.22	4698.3	1.24473	4.27e-148	3.09e-145	Up	K00975 glgC; glucose-1-phosphate adenylyltransferase [EC:2.7.7.27]	ko00500:Starch and sucrose metabolism|ko00520:Amino sugar and nucleotide sugar metabolism	GO:0003674;GO:0003824;GO:0008878;GO:0016740;GO:0016772;GO:0016779;GO:0070566;	GO:0000271;GO:0005975;GO:0005976;GO:0005982;GO:0006073;GO:0008150;GO:0008152;GO:0009058;GO:0009059;GO:0009250;GO:0009987;GO:0016051;GO:0019252;GO:0033692;GO:0034637;GO:0034645;GO:0043170;GO:0044042;GO:0044237;GO:0044238;GO:0044249;GO:0044260;GO:0044262;GO:0044264;GO:0071704;GO:1901576;	GO:0005575;GO:0005622;GO:0005623;GO:0005737;GO:0009501;GO:0009507;GO:0009536;GO:0010170;GO:0032991;GO:0043226;GO:0043227;GO:0043229;GO:0043231;GO:0044424;GO:0044444;GO:0044464;GO:0061695;GO:1902494;GO:1902503;GO:1990234;	This protein plays a role in synthesis of starch. It catalyzes the synthesis of the activated glycosyl donor, ADP- glucose from Glc-1-P and ATP	Glucose-1-phosphate adenylyltransferase
Cla97C11G211530	1116	6.01418	21.2333	1.80205	0.00385505	0.011896	Up	NA	NA	NA	NA	NA	NA	F-box protein
Cla97C11G211770	999	16.6082	36.6741	1.14948	0.00494993	0.014779	Up	NA	NA	NA	NA	NA	Pollen proteins Ole e I like	Pollen Ole e 1 allergen and extensin family protein
Cla97C11G212150	1290	125.654	255.646	1.02338	5.24e-11	7.15e-10	Up	NA	NA	NA	NA	NA	Protein trichome birefringence-like 19	protein trichome birefringence-like 19
Cla97C11G212830	258	127.329	260.479	1.03643	8.04e-11	1.07e-09	Up	NA	NA	NA	NA	NA	Heavy-metal-associated domain	Heavy metal transport/detoxification superfamily protein
Cla97C11G212900	1245	43.5959	89.7138	1.04196	6.5e-05	0.000314614	Up	K09286 EREBP; EREBP-like factor	NA	GO:0001067;GO:0003674;GO:0003676;GO:0003677;GO:0003700;GO:0005488;GO:0043565;GO:0044212;GO:0097159;GO:0140110;GO:1901363;	GO:0001101;GO:0006355;GO:0006950;GO:0008150;GO:0009266;GO:0009408;GO:0009628;GO:0009719;GO:0009725;GO:0009737;GO:0009889;GO:0009891;GO:0009893;GO:0010033;GO:0010286;GO:0010468;GO:0010556;GO:0010557;GO:0010604;GO:0010628;GO:0019219;GO:0019222;GO:0031323;GO:0031325;GO:0031326;GO:0031328;GO:0033993;GO:0042221;GO:0045893;GO:0045935;GO:0048518;GO:0048522;GO:0050789;GO:0050794;GO:0050896;GO:0051171;GO:…	GO:0005575;GO:0005622;GO:0005623;GO:0005634;GO:0043226;GO:0043227;GO:0043229;GO:0043231;GO:0044424;GO:0044464;	Dehydration-responsive element-binding protein	Dehydration-responsive element-binding protein 2C
Cla97C11G212910	618	62.564	164.505	1.39905	1.28e-10	1.65e-09	Up	K14496 PYL; abscisic acid receptor PYR/PYL family	ko04016:MAPK signaling pathway - plant|ko04075:Plant hormone signal transduction	NA	NA	NA	Abscisic acid receptor	abscisic acid receptor PYL4-like
Cla97C11G213310	1551	72.0894	297.572	2.04474	5.53e-35	4.45e-33	Up	NA	NA	NA	GO:0000902;GO:0000904;GO:0008150;GO:0008152;GO:0009058;GO:0009059;GO:0009653;GO:0009888;GO:0009987;GO:0010026;GO:0010090;GO:0010143;GO:0016043;GO:0030154;GO:0032502;GO:0032989;GO:0043170;GO:0048468;GO:0048856;GO:0048869;GO:0051179;GO:0071704;GO:0071840;GO:0090558;GO:0090626;GO:1901576;	GO:0005575;GO:0005622;GO:0005623;GO:0005737;GO:0044424;GO:0044464;	Transferase family	HXXXD-type acyl-transferase family protein
Cla97C11G214200	1248	16.2117	33.8687	1.05137	0.0146532	0.0376373	Up	K02878 RP-L16, MRPL16, rplP; large subunit ribosomal protein L16	ko03010:Ribosome	NA	NA	NA	Ribosomal protein L16p/L10e	Ribulose bisphosphate carboxylase large chain
Cla97C11G214380	627	63.9167	159.061	1.31676	0.0121703	0.0320948	Up	NA	NA	NA	NA	NA	NA	Inactive ubiquitin carboxyl-terminal hydrolase 54
Cla97C11G214410	1101	3.51559	16.7642	2.26298	0.00966176	0.0263266	Up	K03046 rpoC; DNA-directed RNA polymerase subunit beta' [EC:2.7.7.6]	ko03020:RNA polymerase	NA	NA	GO:0000428;GO:0005575;GO:0005622;GO:0005623;GO:0005737;GO:0009507;GO:0009536;GO:0030880;GO:0032991;GO:0043226;GO:0043227;GO:0043229;GO:0043231;GO:0044424;GO:0044444;GO:0044464;GO:0061695;GO:1902494;GO:1990234;	RNA polymerase	DNA-directed RNA polymerase subunit beta''
Cla97C11G215260	1005	34.4534	89.0525	1.37074	4.74e-07	3.52e-06	Up	NA	NA	NA	NA	NA	Carboxylesterase	alpha/beta-Hydrolases superfamily protein
Cla97C11G215850	927	15.686	34.3809	1.13378	0.00807654	0.0225506	Up	K18753 ZFP36L; butyrate response factor	NA	GO:0003674;GO:0003676;GO:0003723;GO:0003729;GO:0003730;GO:0005488;GO:0097159;GO:1901363;	GO:0001558;GO:0006355;GO:0006417;GO:0008150;GO:0009889;GO:0009890;GO:0009891;GO:0009892;GO:0009893;GO:0009894;GO:0009896;GO:0010468;GO:0010556;GO:0010557;GO:0010558;GO:0010604;GO:0010605;GO:0010608;GO:0010628;GO:0010629;GO:0017148;GO:0019219;GO:0019222;GO:0022603;GO:0022604;GO:0030308;GO:0031323;GO:0031324;GO:0031325;GO:0031326;GO:0031327;GO:0031328;GO:0031329;GO:0031331;GO:0032268;GO:0032269;GO:…	GO:0005575;GO:0005622;GO:0005623;GO:0005737;GO:0005829;GO:0044424;GO:0044444;GO:0044464;	zinc finger CCCH domain-containing protein	Zinc finger CCCH domain-containing protein 14-like
Cla97C11G216560	1446	3.67034	14.0296	1.90903	0.0154411	0.0393463	Up	K03320 amt, AMT, MEP; ammonium transporter, Amt family	NA	GO:0003674;GO:0005215;GO:0008324;GO:0008519;GO:0015075;GO:0022857;	GO:0006810;GO:0006811;GO:0006812;GO:0008150;GO:0009605;GO:0009607;GO:0009624;GO:0015695;GO:0015696;GO:0015837;GO:0015843;GO:0019755;GO:0034220;GO:0043207;GO:0050896;GO:0051179;GO:0051234;GO:0051704;GO:0051707;GO:0055085;GO:0071702;GO:0071705;GO:0072488;GO:0098655;	GO:0005575;GO:0005623;GO:0005886;GO:0005887;GO:0016020;GO:0016021;GO:0031224;GO:0031226;GO:0044425;GO:0044459;GO:0044464;GO:0071944;	Ammonium transporter	Ammonium transporter
Cla97C11G217390	1941	71.0326	346.098	2.27598	6.87e-36	5.91e-34	Up	K03283 HSPA1s; heat shock 70kDa protein 1/2/6/8	ko03040:Spliceosome|ko04141:Protein processing in endoplasmic reticulum|ko04144:Endocytosis	NA	NA	NA	heat shock	heat shock 70 kDa protein
Cla97C11G218330	378	90.2626	186.217	1.0432	5.6e-09	5.78e-08	Up	NA	NA	NA	NA	NA	NA	Unknown protein
Cla97C11G218460	528	14.3916	32.1699	1.17403	0.00732794	0.0207786	Up	NA	NA	GO:0003674;GO:0003700;GO:0140110;	GO:0006355;GO:0007154;GO:0007165;GO:0008150;GO:0009719;GO:0009725;GO:0009741;GO:0009742;GO:0009755;GO:0009889;GO:0009987;GO:0010033;GO:0010468;GO:0010556;GO:0014070;GO:0019219;GO:0019222;GO:0023052;GO:0031323;GO:0031326;GO:0032870;GO:0033993;GO:0040008;GO:0042221;GO:0043401;GO:0048545;GO:0050789;GO:0050794;GO:0050896;GO:0051171;GO:0051252;GO:0051716;GO:0060255;GO:0065007;GO:0070887;GO:0071310;GO:…	NA	transcription factor	Transcription factor IBH1
Cla97C11G219090	3894	8.43801	25.7431	1.60441	0.00427276	0.0130026	Up	K05658 ABCB1, CD243; ATP-binding cassette, subfamily B (MDR/TAP), member 1 [EC:7.6.2.2]	ko02010:ABC transporters	GO:0003674;GO:0005215;GO:0010329;GO:0015562;GO:0022857;GO:0080161;	GO:0006810;GO:0008150;GO:0009914;GO:0009926;GO:0009966;GO:0010315;GO:0010540;GO:0010646;GO:0010817;GO:0010928;GO:0023051;GO:0048583;GO:0050789;GO:0050794;GO:0051179;GO:0051234;GO:0055085;GO:0060918;GO:0065007;GO:0065008;GO:0007165;GO:0007154;GO:0009987;GO:0023052;GO:0050896;GO:0051716;GO:0009719;GO:0009725;GO:0009733;GO:0009734;GO:0009755;GO:0010033;GO:0070887;GO:0032870;GO:0042221;GO:0071310;GO:…	GO:0005575;GO:0005623;GO:0005886;GO:0005911;GO:0009506;GO:0016020;GO:0030054;GO:0044464;GO:0055044;GO:0071944;	ABC transporter B family member	ABC transporter B family protein
Cla97C11G219610	732	1475.65	15267.2	3.37002	0	0	Up	NA	NA	NA	GO:0006996;GO:0007275;GO:0008150;GO:0009555;GO:0009987;GO:0016043;GO:0032501;GO:0032502;GO:0034389;GO:0040007;GO:0040008;GO:0045927;GO:0048229;GO:0048518;GO:0048583;GO:0048584;GO:0048589;GO:0048856;GO:0050789;GO:0065007;GO:0071840;GO:0080134;GO:0080186;GO:1902584;GO:2000070;GO:0050896;GO:0006950;GO:0001101;GO:0009414;GO:0009415;GO:0009628;GO:0010035;GO:0042221;GO:1901700;	GO:0005575;GO:0005622;GO:0005623;GO:0005737;GO:0005773;GO:0005783;GO:0005811;GO:0012505;GO:0043226;GO:0043227;GO:0043228;GO:0043229;GO:0043231;GO:0043232;GO:0044424;GO:0044444;GO:0044464;	REF SRPP-like protein	REF/SRPP-like protein At1g67360
Cla97C11G219810	2493	4.91129	22.9131	2.19429	0.000758321	0.00282712	Up	K01427 URE; urease [EC:3.5.1.5]	ko00220:Arginine biosynthesis|ko00230:Purine metabolism	GO:0003674;GO:0003824;GO:0009039;GO:0016787;GO:0016810;GO:0016811;	GO:0006807;GO:0008150;GO:0008152;	NA	belongs to the metallo- dependent hydrolases superfamily. Urease alpha subunit family	Urease
Cla97C11G220550	945	37.0746	91.1445	1.29739	2.31e-06	1.5e-05	Up	NA	NA	NA	NA	NA	NA	BEST Arabidopsis thaliana protein match is: methyltransferases .
Cla97C11G220820	966	55.7721	139.701	1.32337	3.18e-10	3.89e-09	Up	NA	NA	NA	NA	NA	Histidine phosphatase superfamily (branch 1)	Phosphoglycerate mutase family protein
Cla97C11G221310	315	7.35518	24.1461	1.71589	0.00146568	0.00509539	Up	NA	NA	NA	NA	NA	NA	Unknown protein
Cla97C11G221890	900	1754.85	5074.35	1.5318	1.63e-115	6.24e-113	Up	NA	NA	GO:0003674;GO:0003676;GO:0003677;GO:0003700;GO:0005488;GO:0043565;GO:0097159;GO:0140110;GO:1901363;	GO:0000003;GO:0002831;GO:0003006;GO:0006355;GO:0006950;GO:0007275;GO:0008150;GO:0009266;GO:0009409;GO:0009611;GO:0009628;GO:0009787;GO:0009788;GO:0009790;GO:0009791;GO:0009793;GO:0009889;GO:0009891;GO:0009893;GO:0009966;GO:0009968;GO:0010154;GO:0010468;GO:0010556;GO:0010557;GO:0010604;GO:0010628;GO:0010646;GO:0010648;GO:0019219;GO:0019222;GO:0022414;GO:0022622;GO:0023051;GO:0023057;GO:0031323;GO:…	GO:0005575;GO:0005622;GO:0005623;GO:0005634;GO:0043226;GO:0043227;GO:0043229;GO:0043231;GO:0044424;GO:0044464;	NAC domain-containing protein	NAC domain-containing protein
Cla97C11G222760	618	17.729	59.0152	1.72196	1.31e-06	8.96e-06	Up	NA	NA	NA	NA	NA	VQ motif	VQ motif-containing protein 22-like
Cla97C11G222860	672	6.75602	33.6938	2.32412	3.01e-06	1.91e-05	Up	NA	NA	GO:0003674;GO:0003824;GO:0008194;GO:0016740;GO:0016757;GO:0016758;GO:0035251;GO:0046527;GO:0080043;GO:0080044;GO:0080046;	GO:0001101;GO:0006066;GO:0006082;GO:0006629;GO:0006714;GO:0006720;GO:0006721;GO:0006950;GO:0006970;GO:0008150;GO:0008152;GO:0008300;GO:0009056;GO:0009628;GO:0009651;GO:0009687;GO:0009719;GO:0009725;GO:0009737;GO:0009987;GO:0010033;GO:0016042;GO:0016054;GO:0016107;GO:0016115;GO:0019752;GO:0032787;GO:0033993;GO:0042221;GO:0043288;GO:0043290;GO:0043436;GO:0044237;GO:0044238;GO:0044242;GO:0044248;GO:…	GO:0005575;GO:0005622;GO:0005623;GO:0005737;GO:0005829;GO:0016020;GO:0043226;GO:0043227;GO:0043229;GO:0043231;GO:0044424;GO:0044444;GO:0044464;	Belongs to the UDP-glycosyltransferase family	Glycosyltransferase
Cla97C11G223150	1074	155.338	542.835	1.80452	4.49e-48	5.79e-46	Up	NA	NA	GO:0003674;GO:0003824;GO:0016491;GO:0016679;GO:0016682;	GO:0007275;GO:0007568;GO:0008150;GO:0008152;GO:0010150;GO:0032501;GO:0032502;GO:0048366;GO:0048367;GO:0048731;GO:0048827;GO:0048856;GO:0055114;GO:0090693;GO:0099402;	NA	Belongs to the iron ascorbate-dependent oxidoreductase family	2-oxoglutarate (2OG) and Fe(II)-dependent oxygenase superfamily protein
Cla97C11G223430	387	10.0289	25.6299	1.33987	0.00804165	0.0224625	Up	NA	NA	NA	NA	NA	NA	histidine-rich glycoprotein-like
Cla97C11G224390	456	36.4519	77.0332	1.08733	0.000198306	0.000856078	Up	K05350 bglB; beta-glucosidase [EC:3.2.1.21]	ko00460:Cyanoamino acid metabolism|ko00500:Starch and sucrose metabolism|ko00999:Biosynthesis of various plant secondary metabolites	GO:0003674;GO:0003824;GO:0004553;GO:0008422;GO:0015926;GO:0016787;GO:0016798;	GO:0008150;GO:0008152;GO:0071704;GO:1901135;GO:1901657;	NA	Belongs to the glycosyl hydrolase 1 family	Beta-glucosidase
Cla97C11G224410	1461	55.3635	140.647	1.34599	8.04e-09	8.11e-08	Up	K05350 bglB; beta-glucosidase [EC:3.2.1.21]	ko00460:Cyanoamino acid metabolism|ko00500:Starch and sucrose metabolism|ko00999:Biosynthesis of various plant secondary metabolites	GO:0003674;GO:0003824;GO:0004553;GO:0008422;GO:0015926;GO:0016787;GO:0016798;	GO:0008150;GO:0008152;GO:0071704;GO:1901135;GO:1901657;	NA	Belongs to the glycosyl hydrolase 1 family	beta-glucosidase 18-like
Cla97C11G224710	1005	23.6419	72.814	1.61085	5.63e-07	4.13e-06	Up	NA	NA	NA	NA	NA	NA	Protein SPOROCYTELESS
Cla97C02G041360	2628	2.21166	31.879	3.83373	5.08e-08	4.48e-07	Up	K15718 LOX1_5; linoleate 9S-lipoxygenase [EC:1.13.11.58]	ko00591:Linoleic acid metabolism	NA	NA	GO:0005575;GO:0005622;GO:0005623;GO:0005737;GO:0044424;GO:0044464;	Plant lipoxygenase may be involved in a number of diverse aspects of plant physiology including growth and development, pest resistance, and senescence or responses to wounding	Lipoxygenase
Cla97C03G051460	399	3.1663	15.4734	2.27888	0.0034078	0.0106787	Up	NA	NA	NA	NA	NA	NA	extensin-like isoform X2
Cla97C03G051470	228	0.349922	6.91063	4.32123	0.0040175	0.0123315	Up	NA	NA	NA	NA	NA	NA	Protein PSY3
Cla97C05G108200	1527	3.21386	30.4178	3.24354	5.85e-07	4.28e-06	Up	NA	NA	GO:0003674;GO:0003824;GO:0004497;GO:0016491;GO:0016705;GO:0016709;	GO:0006950;GO:0008150;GO:0008152;GO:0009058;GO:0009266;GO:0009408;GO:0009628;GO:0010286;GO:0019748;GO:0044550;GO:0050896;GO:0055114;	GO:0005575;GO:0016020;	Cytochrome p450	cytochrome P450 71B34-like
Cla97C06G110120	567	3.86615	31.816	3.04103	1.21e-06	8.32e-06	Up	NA	NA	NA	NA	GO:0005575;GO:0005576;	invertase	PMEI domain-containing protein
Cla97C06G113250	1491	1.90929	10.8661	2.49638	0.00803682	0.0224521	Up	NA	NA	NA	NA	NA	O-glucosyltransferase rumi homolog	protein O-glucosyltransferase 1-like
Cla97C07G134540	435	2.6567	11.716	2.17554	0.0134139	0.0349013	Up	NA	NA	NA	NA	NA	NA	Unknown protein
Cla97C08G157670	954	0.699845	9.16433	3.81038	0.00382564	0.0118143	Up	K00430 E1.11.1.7; peroxidase [EC:1.11.1.7]	ko00940:Phenylpropanoid biosynthesis	GO:0003674;GO:0003824;GO:0004601;GO:0016209;GO:0016491;GO:0016684;	GO:0008150;GO:0008152;GO:0009636;GO:0009664;GO:0009987;GO:0016043;GO:0042221;GO:0045229;GO:0050896;GO:0051716;GO:0055114;GO:0070887;GO:0071554;GO:0071555;GO:0071669;GO:0071840;GO:0097237;GO:0098754;GO:0098869;GO:1990748;	GO:0005575;GO:0005618;GO:0005623;GO:0005911;GO:0009505;GO:0009506;GO:0030054;GO:0030312;GO:0044464;GO:0055044;GO:0071944;	Removal of H(2)O(2), oxidation of toxic reductants, biosynthesis and degradation of lignin, suberization, auxin catabolism, response to environmental stresses such as wounding, pathogen attack and oxidative stress	Peroxidase
Cla97C11G210270	294	0.954647	10.1492	3.39676	0.0025652	0.00834184	Up	K14488 SAUR; SAUR family protein	ko04075:Plant hormone signal transduction	NA	NA	NA	Auxin responsive protein	auxin-responsive protein SAUR21-like
Cla97C05G082680	762	0.604724	6.94057	3.4573	0.015591	0.0396634	Up	NA	NA	GO:0003674;GO:0005488;GO:0030246;	NA	NA	f-box protein	F-box domain-containing protein
Cla97C05G093330	459	0.604724	6.44436	3.34182	0.0197458	0.0484902	Up	NA	NA	NA	NA	NA	MLP-like protein	major latex protein 15-like
Cla97C10G196680	531	0.604724	15.1825	4.57612	0.000150326	0.00066944	Up	NA	NA	NA	NA	NA	LOB domain-containing protein	LOB domain-containing protein
Cla97C11G207650	456	0.907087	67.1919	6.13018	5.63e-12	8.75e-11	Up	NA	NA	GO:0003674;GO:0005488;GO:0005507;GO:0043167;GO:0043169;GO:0046872;GO:0046914;	GO:0000003;GO:0003006;GO:0007275;GO:0008150;GO:0009719;GO:0009725;GO:0009735;GO:0009791;GO:0010033;GO:0010035;GO:0010038;GO:0010043;GO:0010228;GO:0014070;GO:0022414;GO:0032501;GO:0032502;GO:0042221;GO:0048608;GO:0048731;GO:0048856;GO:0050896;GO:0061458;GO:0080184;	GO:0005575;GO:0005622;GO:0005623;GO:0005737;GO:0005829;GO:0044424;GO:0044444;GO:0044464;	MLP-like protein	MLP-like protein 328
Cla97C01G000190	201	0	4.5144	4.66772	0.00555688	0.0163333	Up	K01057 PGLS, pgl, devB; 6-phosphogluconolactonase [EC:3.1.1.31]	ko00030:Pentose phosphate pathway	GO:0003674;GO:0003824;GO:0016787;GO:0016788;GO:0017057;GO:0052689;	GO:0002229;GO:0002239;GO:0006081;GO:0006082;GO:0006098;GO:0006139;GO:0006725;GO:0006732;GO:0006733;GO:0006739;GO:0006753;GO:0006793;GO:0006796;GO:0006807;GO:0006950;GO:0006952;GO:0008150;GO:0008152;GO:0009051;GO:0009117;GO:0009605;GO:0009607;GO:0009617;GO:0009987;GO:0019362;GO:0019637;GO:0019682;GO:0019693;GO:0034641;GO:0042126;GO:0042128;GO:0042742;GO:0043207;GO:0043436;GO:0044237;GO:0044238;GO:…	GO:0005575;GO:0005622;GO:0005623;GO:0005737;GO:0005773;GO:0005774;GO:0005777;GO:0005829;GO:0009507;GO:0009532;GO:0009536;GO:0009570;GO:0016020;GO:0031090;GO:0042579;GO:0043226;GO:0043227;GO:0043229;GO:0043231;GO:0044422;GO:0044424;GO:0044434;GO:0044435;GO:0044437;GO:0044444;GO:0044446;GO:0044464;GO:0098588;GO:0098805;	6-phosphogluconolactonase 4	Glucosamine_iso domain-containing protein
Cla97C02G036120	516	0	5.72739	5.00384	0.00220167	0.00730161	Up	NA	NA	GO:0003674;GO:0003700;GO:0140110;	GO:0000003;GO:0003006;GO:0006355;GO:0007275;GO:0007276;GO:0008150;GO:0009555;GO:0009889;GO:0009987;GO:0010468;GO:0010556;GO:0019219;GO:0019222;GO:0019953;GO:0022412;GO:0022414;GO:0030154;GO:0031323;GO:0031326;GO:0032501;GO:0032502;GO:0032504;GO:0044703;GO:0048229;GO:0048232;GO:0048235;GO:0048609;GO:0048856;GO:0048869;GO:0050789;GO:0050794;GO:0051171;GO:0051252;GO:0051704;GO:0055046;GO:0060255;GO:…	GO:0005575;GO:0005622;GO:0005623;GO:0005634;GO:0043226;GO:0043227;GO:0043229;GO:0043231;GO:0044424;GO:0044464;	Zinc finger protein	zinc finger protein ZAT3-like
Cla97C02G043560	279	0	7.24416	5.35189	0.000415834	0.00166597	Up	K00815 TAT; tyrosine aminotransferase [EC:2.6.1.5]	ko00130:Ubiquinone and other terpenoid-quinone biosynthesis|ko00270:Cysteine and methionine metabolism|ko00350:Tyrosine metabolism|ko00360:Phenylalanine metabolism|ko00400:Phenylalanine, tyrosine and tryptophan biosynthesis|ko00950:Isoquinoline alkaloid biosynthesis|ko00960:Tropane, piperidine and pyridine alkaloid biosynthesis	GO:0003674;GO:0003824;GO:0004838;GO:0008483;GO:0016740;GO:0016769;GO:0070547;	GO:0006082;GO:0006520;GO:0006570;GO:0006572;GO:0006725;GO:0006807;GO:0008150;GO:0008152;GO:0009056;GO:0009063;GO:0009072;GO:0009074;GO:0009987;GO:0016054;GO:0019439;GO:0019752;GO:0043436;GO:0044237;GO:0044238;GO:0044248;GO:0044281;GO:0044282;GO:0046395;GO:0071704;GO:1901360;GO:1901361;GO:1901564;GO:1901565;GO:1901575;GO:1901605;GO:1901606;	GO:0005575;GO:0005622;GO:0005623;GO:0005737;GO:0005829;GO:0044424;GO:0044444;GO:0044464;	Aminotransferase	tyrosine aminotransferase-like
Cla97C02G047970	4050	0	8.16652	5.52839	0.000179254	0.000782592	Up	NA	NA	NA	NA	NA	FES	ENDO3c domain-containing protein
Cla97C04G069790	447	0	5.20862	4.87398	0.0029029	0.00929973	Up	NA	NA	NA	NA	NA	NA	Unknown protein
Cla97C05G080220	804	0	4.14094	4.54491	0.00837878	0.0232789	Up	NA	NA	NA	GO:0000902;GO:0008150;GO:0009653;GO:0009664;GO:0009826;GO:0009827;GO:0009828;GO:0009987;GO:0016043;GO:0016049;GO:0032502;GO:0032989;GO:0040007;GO:0042545;GO:0045229;GO:0048589;GO:0048856;GO:0048869;GO:0060560;GO:0071554;GO:0071555;GO:0071669;GO:0071840;	GO:0005575;GO:0005618;GO:0005623;GO:0016020;GO:0030312;GO:0044464;GO:0071944;	Belongs to the expansin family	Beta-expansin
Cla97C05G093880	597	0	5.18866	4.86953	0.00271551	0.00876585	Up	NA	NA	NA	NA	NA	NA	Unknown protein
Cla97C06G116170	744	0	5.77029	5.02806	0.0016326	0.00560446	Up	K14484 IAA; auxin-responsive protein IAA	ko04075:Plant hormone signal transduction	GO:0003674;GO:0003700;GO:0005488;GO:0005515;GO:0042802;GO:0140110;	GO:0001101;GO:0006355;GO:0006950;GO:0007154;GO:0007165;GO:0007275;GO:0008150;GO:0009414;GO:0009415;GO:0009605;GO:0009606;GO:0009611;GO:0009628;GO:0009629;GO:0009630;GO:0009653;GO:0009719;GO:0009725;GO:0009733;GO:0009734;GO:0009753;GO:0009755;GO:0009791;GO:0009889;GO:0009890;GO:0009892;GO:0009987;GO:0010015;GO:0010033;GO:0010035;GO:0010101;GO:0010102;GO:0010468;GO:0010556;GO:0010558;GO:0010605;GO:…	GO:0005575;GO:0005622;GO:0005623;GO:0005634;GO:0043226;GO:0043227;GO:0043229;GO:0043231;GO:0044424;GO:0044464;	Aux IAA proteins are short-lived transcriptional factors that function as repressors of early auxin response genes at low auxin concentrations	Auxin-responsive protein
Cla97C06G118180	321	0	8.34197	5.56415	0.000172028	0.00075561	Up	NA	NA	NA	NA	NA	NA	Unknown protein
Cla97C06G119480	1155	0	18.2456	6.68026	5.07e-07	3.75e-06	Up	NA	NA	NA	GO:0007154;GO:0007165;GO:0008150;GO:0009719;GO:0009725;GO:0009733;GO:0009734;GO:0009755;GO:0009987;GO:0010033;GO:0023052;GO:0032870;GO:0042221;GO:0050789;GO:0050794;GO:0050896;GO:0051716;GO:0065007;GO:0070887;GO:0071310;GO:0071365;GO:0071495;	GO:0005575;GO:0005622;GO:0005623;GO:0005737;GO:0005886;GO:0005887;GO:0005938;GO:0016020;GO:0016021;GO:0031224;GO:0031226;GO:0044424;GO:0044425;GO:0044444;GO:0044459;GO:0044464;GO:0071944;GO:0099568;	WAT1-related protein	WAT1-related protein
Cla97C07G128900	651	0	4.08825	4.52974	0.00871565	0.0240661	Up	K14484 IAA; auxin-responsive protein IAA	ko04075:Plant hormone signal transduction	NA	NA	NA	Aux IAA proteins are short-lived transcriptional factors that function as repressors of early auxin response genes at low auxin concentrations	Auxin-responsive protein
Cla97C08G145390	474	0	3.64214	4.37078	0.0148983	0.0381649	Up	NA	NA	GO:0003674;GO:0003700;GO:0140110;	GO:0006355;GO:0008150;GO:0009889;GO:0010468;GO:0010556;GO:0019219;GO:0019222;GO:0031323;GO:0031326;GO:0050789;GO:0050794;GO:0051171;GO:0051252;GO:0060255;GO:0065007;GO:0080090;GO:1903506;GO:2000112;GO:2001141;GO:0008152;GO:0006139;GO:0006351;GO:0006725;GO:0006807;GO:0009058;GO:0009059;GO:0009987;GO:0010467;GO:0016070;GO:0018130;GO:0019438;GO:0032774;GO:0034641;GO:0034645;GO:0034654;GO:0043170;GO:…	NA	Ethylene-responsive transcription factor ERF022-like	ethylene-responsive transcription factor ERF022-like
Cla97C08G148500	978	0	103.976	9.19397	2.59e-14	5.31e-13	Up	K10523 SPOP; speckle-type POZ protein	NA	GO:0003674;GO:0005488;GO:0005515;GO:0019899;GO:0031625;GO:0044389;	GO:0006508;GO:0006511;GO:0006807;GO:0008150;GO:0008152;GO:0009056;GO:0009057;GO:0009987;GO:0010498;GO:0019222;GO:0019538;GO:0019941;GO:0030162;GO:0030163;GO:0043161;GO:0043170;GO:0043632;GO:0044237;GO:0044238;GO:0044248;GO:0044257;GO:0044260;GO:0044265;GO:0044267;GO:0050789;GO:0051171;GO:0051246;GO:0051603;GO:0060255;GO:0065007;GO:0071704;GO:0080090;GO:1901564;GO:1901565;GO:1901575;	GO:0000151;GO:0005575;GO:0005622;GO:0005623;GO:0005737;GO:0019005;GO:0031461;GO:0031463;GO:0032991;GO:0044424;GO:0044464;GO:1902494;GO:1990234;	BTB POZ domain-containing protein	BTB/POZ domain-containing protein
Cla97C09G171040	759	0	22.7972	7.00162	7.96e-08	6.77e-07	Up	NA	NA	NA	NA	NA	NA	Pentatricopeptide repeat-containing protein
Cla97C09G174940	516	0	207.334	10.1925	1.16e-17	3.22e-16	Up	NA	NA	NA	NA	NA	NA	Unknown protein
Cla97C09G176880	1059	0	4.83516	4.76807	0.00409939	0.0125449	Up	K01184 E3.2.1.15; polygalacturonase [EC:3.2.1.15]	ko00040:Pentose and glucuronate interconversions	NA	NA	GO:0005575;GO:0005576;GO:0005618;GO:0005623;GO:0030312;GO:0044464;GO:0071944;	Polygalacturonase-like	Pectin lyase-like superfamily protein
Cla97C10G187970	249	0	8.19906	5.52231	0.000229396	0.000975618	Up	NA	NA	NA	NA	NA	NA	Retrotransposable element Tf2
Cla97C10G187980	213	0	7.36691	5.38399	0.000368919	0.00149658	Up	NA	NA	NA	NA	NA	NA	Unknown protein
Cla97C10G188240	1011	0	6.8707	5.27668	0.000597381	0.00229605	Up	K15803 GERD; (-)-germacrene D synthase [EC:4.2.3.75]	ko00909:Sesquiterpenoid and triterpenoid biosynthesis	NA	NA	NA	(-)-germacrene D synthase-like	(-)-germacrene D synthase-like
Cla97C10G189450	393	0	8.21921	5.53598	0.000176286	0.0007718	Up	NA	NA	NA	NA	NA	NA	Unknown protein
Cla97C10G193560	1218	0	17.1426	6.59609	6.62e-07	4.78e-06	Up	NA	NA	GO:0003674;GO:0003824;GO:0016740;GO:0016746;	GO:0005975;GO:0005984;GO:0005985;GO:0008150;GO:0008152;GO:0009311;GO:0009987;GO:0044237;GO:0044238;GO:0044262;GO:0071704;	NA	Transferase family	vinorine synthase-like
Cla97C10G199060	237	0	4.52438	4.67021	0.00551865	0.0162398	Up	NA	NA	NA	NA	NA	NA	auxin-regulated gene involved in organ size
Cla97C11G218320	1467	0	3.41399	4.26921	0.0185774	0.0460736	Up	K03327 TC.MATE, SLC47A, norM, mdtK, dinF; multidrug resistance protein, MATE family	NA	NA	NA	NA	Belongs to the multi antimicrobial extrusion (MATE) (TC 2.A.66.1) family	Protein DETOXIFICATION
